# Supplementary material
Source: PubMed Central journal article supplement (PMC3349428)
Supplement: supp_dds083_dds083supp.pdf [file supp_dds083_dds083supp.pdf]

**Penetrance of biallelic *SMARCA1* mutations is associated with  
environmental and genetic disturbances of gene expression**

Alireza Baradaran-Heravi, Kyoung Sang Cho, Bas Tolhuis, Mrinmoy Sanyal, Olena Morozova,  
Marie Morimoto, Leah I. Elizondo, Darren Bridgewater, Joanna Lubieniecka, Kimberly Beirnes,  
Clara Myung, Danny Leung, Hok Khim Fam, Kunho Choi, Yan Huang, Kira Y. Dionis,  
Jonathan Zonana, Kory Keller, Peter Stenzel, Christy Mayfield, Thomas Lücke, Arend  
Bokenkamp, Marco A. Marra, Maarten van Lohuizen, David B. Lewis, Chad Shaw, and  
Cornelius F. Boerkoel

**Table of Contents:**

|                                |      |
|--------------------------------|------|
| Supplementary Methods.....     | 3-29 |
| Supplementary Figure S1.....   | 30   |
| Supplementary Figure S2.....   | 31   |
| Supplementary Figure S3.....   | 32   |
| Supplementary Figure S4.....   | 33   |
| Supplementary Figure S5.....   | 34   |
| Supplementary Figure S6.....   | 35   |
| Supplementary Figure S7.....   | 36   |
| Supplementary Figure S8.....   | 37   |
| Supplementary Figure S9.....   | 38   |
| Supplementary Figure S10 ..... | 39   |
| Supplementary Figure S11.....  | 40   |

|                               |         |
|-------------------------------|---------|
| Supplementary Figure S12..... | 41      |
| Supplementary Figure S13..... | 42      |
| Supplementary Figure S14..... | 43      |
| Supplementary Table S1.....   | 44      |
| Supplementary Table S2.....   | 45-47   |
| Supplementary Table S3.....   | 48-298  |
| Supplementary Table S4.....   | 299-303 |
| Supplementary Table S5.....   | 304-309 |
| Supplementary Table S6.....   | 310-311 |
| Supplementary Table S7.....   | 312-490 |
| Supplementary Table S8.....   | 491     |
| Supplementary Table S9.....   | 492     |
| Supplementary Table S10.....  | 493-823 |
| Supplementary Table S11.....  | 824-827 |
| Supplementary Table S12.....  | 828-830 |
| Supplementary Table S13.....  | 831     |
| Supplementary Table S14.....  | 832-836 |
| Supplementary Table S15.....  | 837     |
| Supplementary Table S16.....  | 838-843 |
| Supplementary Table S17.....  | 844-846 |
| Supplementary Table S18.....  | 847     |
| Supplementary Table S19.....  | 848-850 |

## Supplementary Methods

**Human subjects.** Patients referred to this study gave informed consent approved by the Institutional Review Board of Baylor College of Medicine (Houston, TX, USA), the Hospital for Sick Children (Toronto, ON, Canada), or the University of British Columbia (H06-70283, Vancouver, BC, Canada). Also, the institutional review board of Stanford University School of Medicine approved the use of human tissue. The clinical data for patients were obtained from questionnaires completed by the attending physician as well as from the medical records.

**Animal subjects.** Mice used in this study were housed, bred, and euthanized in accordance with accepted ethical guidelines. These procedures were approved by the Institutional Review Board of Baylor College of Medicine (Houston, TX, USA, IRB protocol: AN-2983) or the University of British Columbia (Vancouver, BC, Canada, Animal Care Certificate: A10-0296).

**Generation of *Smarc1* KO construct.** Recombineering was used to make a floxed allele of *Smarc1* (Supplementary Material, Fig. S3). BAC DNA was transformed into the EL350 recombinogenic bacterial strain. The 5' Homology Region (HR), 3' HR, Exon 2 (Ex 2) HR, 5' and 3' Intron 1 (Int 1) HRs and 5' and 3' Intron 3 (Int 3) HRs were all PCR-amplified from RP22-273C7 BAC DNA and sequenced to exclude PCR-introduced mutations. The 5' HR and 3' HR were cloned into pBluescript (Invitrogen, Burlington, ON) containing a *thymidine kinase* (*tk*) negative selection cassette. The gap repair plasmid was linearized with Sal I to create a DNA double-strand break for gap repair, which was electroporated into EL350 cells transformed with the BAC. The mini-targeting vector was generated by ligating 5' Int 1 HR upstream of the *loxP* floxed Neo cassette in plasmid PL452 and 3' Int 1 HR downstream of the *loxP* floxed Neo cassette in PL452. The mini-targeting vector was then linearized with Not I and Sal I and co-

electroporated with the gap repaired plasmid into EL350 cells to yield a plasmid with a floxed *Neo* cassette upstream of *Smarcal1* Exon 2. EL350 contains an arabinose-inducible *Cre Recombinase* gene. Following Cre Recombinase induction, a plasmid containing a *loxP* site upstream of *Smarcal1* Exon 2 was retrieved. A second mini-targeting vector was created by ligating 5' Int 3 HR upstream of the *FRT* flanked *Neo* cassette in plasmid PL451, and 3' Int 3 HR downstream of the *FRT* flanked *Neo* cassette. PL451 also contains a *loxP* site downstream of the 3' *FRT* site. The mini-targeting vector was linearized with Not I and Sal I and co-electroporated with the gap-repaired plasmid into EL350 cells to yield a plasmid with Exons 2 and 3 of *Smarcal1* floxed with *loxP* sites, a *Neo* positive selection cassette downstream of Exon 3 and a *tk* negative selection cassette. This conditional knockout construct was used for targeting *Smarcal1* in the murine genome. To test the functionality of the *FRT* sites and *loxP* sites, the *Neo* selection cassette was excised from the vector in bacteria expressing Flp recombinase and exons 2 and 3 were excised from the vector in cells expressing Cre recombinase (data not shown). The primers we used are shown in supplementary material, table S19.

***Smarcal1* gene targeting and Southern analysis.** The Darwin Core in the Department of Molecular and Human Genetics at the Baylor College of Medicine introduced the linearized conditional knockout construct into 129 SvEv Embryonic Stem (ES) cells by electroporation following standard techniques (1). Resistance to the antibiotic G418 and loss of the *tk* negative selection cassette was used to select ES cells in which the cKO construct inserted by homologous recombination within *Smarcal1*. Integration into the *Smarcal1* locus was confirmed by Southern analysis, using probes upstream of the 5' *loxP* site and in Exon 4 (Supplementary Material, Fig. S4). The integration of the *Smarcal1* cKO construct into the endogenous *Smarcal1* genomic

locus was screened by Southern analysis following XhoI and KpnI/PacI digestion of mouse SvEv embryonic stem cell genomic DNA. The 5' Southern probe is *Smarc11* exon 1 while the 3' probe is exon 4 (Supplementary Material, Fig. S4). After restriction enzyme digestion overnight, DNA was separated on a 0.6% agarose gel in 0.5X TBE at 75 volts for 24 hours. The agarose gel was then exposed to UV radiation for 5 minutes, followed by a 10 minute wash in 0.25 N hydrochloric acid and a 10 minute wash in 0.4 N sodium hydroxide. The DNA was transferred to a nitrocellulose membrane overnight in alkaline transfer buffer (0.4 N sodium hydroxide and 1.0 M sodium chloride). The DNA was fixed to the membrane by soaking the membrane in neutralization buffer (0.5 M Tris-Cl, pH 7.2 and 1.0 M sodium chloride) for 15 minutes followed by UV irradiation. The membrane was placed in pre-hybridization buffer (0.2 M NaPO<sub>4</sub>, pH 7.2; 1.0 mM EDTA; 1% BSA; 7% SDS; 15% formamide) and rocked for 4 hours at 65°C. Using the manufacturer's directions for the Rediprime II Random Prime Labeling System (Amersham/GE Healthcare), exon 4 of *Smarc11* was labeled with alpha-P<sup>32</sup> cytosine. The nitrocellulose membrane containing DNA was incubated with this labeled probe and fresh pre-hybridization buffer with rocking for 12 hours at 65°C. The nitrocellulose membrane was immersed in wash buffer (NaPO<sub>4</sub>, EDTA, 7% SDS) three times for 30 minutes at 65°C. The membrane was subsequently exposed to film until development occurred at -80°C. Southern analysis was also used to identify mice after Cre recombinase removal of *Smarc11* exons 2 and 3.

**Generating *Smarc11* knock-out mice.** In the conditional knockout allele, exons 2 and 3 of *Smarc11* are floxed by *loxP* sites (*Smarc11*<sup>*loxP*</sup>). We observed germ-line transmission in 3 chimeric mice and established these 3 lines separately for analysis. Mice carrying a *GDF9-Cre* transgene (C57BL/6 background), which drives oocyte specific expression of Cre recombinase,

were crossed to the *Smarcal1*<sup>loxP/+</sup> mice. Female mice carrying both the *GDF9-Cre* transgene and the *Smarcal1*<sup>loxP</sup> excise exons 2 and 3 of *Smarcal1* in the oocytes prior to fertilization (2). These female mice were backcrossed to *Smarcal1*<sup>+/+</sup> male mice (129SvEv background) to generate progeny heterozygous for a *Smarcal1* null allele (*Smarcal1*<sup>del/+</sup>). *Smarcal1*<sup>del/+</sup> mice were intercrossed to generate *Smarcal1*<sup>del/del</sup> mice.

**Backcrossing the *Smarcal1*<sup>del</sup> allele onto the C57BL/6 background.** We backcrossed the *Cre*-deleted mice into C57BL/6 background for eight generations. Apart from monitoring black coat color in backcrossed mice, we also analyzed the expression of IgM allotypes in B cells. Since B cells from 129SvEv mice express the IgM-a allotype and B cells from C57BL/6 mice express the IgM-b allotype, we followed IgM-b expression to determine purity of background. At eight generations, the backcrossed mice exclusively expressed IgM b allotype in their B cells suggesting that the backcrossed mice have a nearly homogeneous C57BL/6 background (data not shown).

**Mouse PCR genotyping.** One-centimeter mouse tail clippings were collected on postnatal day 21. Mouse tails were incubated overnight at 55°C in 800 µl tail lysis buffer (0.1 M Tris-HCl, pH 8.5; 5.0 mM EDTA, pH 8.0; 0.2% SDS; 200 mM NaCl) and 30 µl proteinase K solution. The following day, 500 µl of protein precipitation solution (Promega, Madison, WI) was added and solutions were centrifuged at maximum speed for 15 minutes to remove debris. The supernatant was transferred to a new tube, and genomic DNA was precipitated by adding an equal volume of isopropanol. The precipitate was centrifuged at maximum speed for 30 minutes at 4°C and was subsequently washed with 70% ethanol. The genomic DNA was resuspended in TE buffer.

Genotyping was performed by PCR (95°C for 15 minutes, 30 cycles of 95°C for 1 minute, 60°C for 30 seconds, and 72°C for 1 minute) (Supplementary Material, Fig. S4). The PCR primers are listed in supplementary material, table S19.

**Cloning and recombination of *Smarcal1* KO cDNA.** The murine *Smarcal1* KO cDNA was cloned into the ECHO-adapted donor vector pUniBlunt/V5-His-Topo (Invitrogen) such that the V5-His<sub>6</sub> tag was added in frame to the carboxyl tail of the Smarcal1 protein as described (3). For expression of this cDNA in mammalian cells, this donor vector was recombined into the destination vector pcDNA5/FRT/TO-E as described (3).

**RNA extraction.** RNA was extracted from the indicated tissue using the RNeasy Mini Kit (Qiagen). Elimination of genomic DNA was performed using either on-column DNAase (Qiagen) or DNase I (Ambion) following RNA extraction at 37°C for 1 hour. cDNA synthesis was performed using SuperScript III First Strand Kit (Invitrogen) or qScript cDNA SuperMix (Quanta Biosciences).

**RT-PCR.** *Human:* RT-PCR was performed as described(3, 4) using the primers listed in supplementary material, table S19. Quantitative real-time RT-PCR was performed using the ABI 7500 Fast system and PerfeCTa Sybr Fastmx Lrx 1250 (Quanta Biosciences) or a human heat shock proteins and protein folding array (SABiosciences) following the manufacturer's instructions. *Mouse:* For cloning, the *Smarcal1* cDNA was amplified by PCR using Platinum Taq DNA Polymerase (Invitrogen) with the primers listed in supplementary material, table S19 (94°C for 5 minutes, 35 cycles of 94°C for 15 seconds, 55°C for 30 seconds and 68°C for 1

minute). Quantitative real-time RT-PCR was performed using the ABI 7500 Fast system and PerfeCTa Sybr Fastmx Lrx 1250 (Quanta Biosciences) or mouse heat shock PCR arrays (SABiosciences) following the manufacturer's instructions. *Drosophila*: For cloning the *Marcell* cDNA was amplified by PCR using Platinum Taq DNA Polymerase (Invitrogen) with the primers listed in supplementary material, table S19 (94°C for 5 minutes, 35 cycles of 94°C for 15 seconds, 55°C for 30 seconds and 68°C for 1 minute). PCR amplification of other cDNAs was done using HotStarTaq DNA Polymerase (Qiagen) with the primers listed in supplementary material, table S19 (94°C for 15 minutes, 30 cycles of 94°C for 1 minute, 57°C for 1 minute and 72°C for 1 minute). Quantitative PCR was performed using the ABI 7500 Fast system and PerfeCTa Sybr Fastmx Lrx 1250 (Quanta Biosciences).

***RpII* knock-down.** Transfection of fibroblasts was carried out according to the Amaxa Biosystems Human Dermal Fibroblast Nucleofector Kit or the Amaxa Biosystems MEF Nucleofector Kit optimized protocol. For human dermal fibroblasts, we electroporated (Program U-023) 5.0µg of a plasmid expressing a GFP-tagged shRNA targeting *POLR2A* (insert sequence: AACGAGTTGGAGCGGGAATTT) or *POLR2B* (insert sequence: TCAGGTTTCATGTTTGCAATCT) (SABiosciences) or 5.0µg of a plasmid expressing a GFP-tagged non-silencing shRNA (insert sequence: ggaatctcattcgatgcatac) (SABiosciences). For MEFs, we electroporated (Program A-023) 2.5µg of siRNA duplex 1 (Alexa-488-CAGAATCTGGCTACACTTAAA, Qiagen) or siRNA duplex 3 (Alexa-488-CTCAATGATGCTCGAGACAAA, Qiagen) targeting *Polr2a* or non-silencing siRNA duplex (Alexa-488-ACGUGACACGUUCGGAGAA, Qiagen). Thirty-six hours later, we selected transfected cells by fluorescent activated cell sorting and plated them at a concentration of  $1 \times 10^3$ -



10<sup>4</sup> cells/100µl/well of 96-well Wallac cell culture plates. By quantitative real-time RT-PCR at 48 and 96 hours post-transfection, this method reduced expression of *POLR2A* by 50-80%, of *POLR2B* by 45-50%, and of *Polr2a* by 55-65% (siRNA duplex 1) or 70% (siRNA duplex 3). Cell viability and proliferation rate were assessed at 48, 72 and 96 hours post-transfection using the Cell Proliferation Reagent WST-1 (Roche, Laval, QC) according to the manufacturer's protocol and the relative proliferation rates were calculated for either the 24-hour (human fibroblasts) or 48-hour (mouse fibroblasts) intervals. The rate of cell growth in each group was compared for statistically significant differences using the two-tailed Student's *t*-test.

**Marcal1 antibody generation.** The polyclonal antibody to Marcal1 was generated in rabbit by injecting the amino terminus of Marcal1 (amino acids 1-400) and further purified by affinity purification.

**Site directed mutagenesis.** Site directed mutagenesis was performed as previously described (3) using primers listed in supplementary material, table S19.

**Immunofluorescence.** *Drosophila*: Polytene chromosomes of third instar larva were prepared and processed as described (5) and immunostaining of the polytene chromosomes, wing imaginal discs, embryos, eye discs, or testes were performed according to standard procedures (6). We used mouse anti-HA (1:200, Sigma), rabbit anti-acetyl-histone H4 (1:200, Upstate Biotechnology/Millipore), rabbit anti-trimethyl-K4-histone H3 (1:200, Upstate Biotechnology/Millipore) antibodies as primary antibodies. DNA was stained with 4',6-diamidino-2-phenylindole (1:1000, Sigma). Fluorophore-conjugated secondary antibodies were

used to detect the primary antibodies. *Human*: Immunofluorescence studies for human SMARCAL1 were performed with an anti-SMARCAL1 antibody as previously described (3, 7). Expression of the *Smarcal1<sup>del</sup>* cDNA lacking the first two coding exons with a 3' V5-tag in tetracycline-inducible T-Rex-293 cell line (Invitrogen) was detected by rabbit anti-V5 (1:250, Sigma) followed by a fluorophore-conjugated secondary antibody.

**Immunoprecipitation.** To check the physical interaction between Marcal1 or SMARCAL1 and RNA polymerase II, we used homozygous *tubulin-GAL4, UAS-HA-GFP-Marcal1* flies as well as T-REx-293 cells expressing V5-tagged SMARCAL1(3). The extracts of 100 flies were subjected to immunoprecipitation using monoclonal anti-HA agarose conjugate (Sigma). The T-Rex-293 nuclear extracts were incubated with rabbit anti-V5 agarose conjugate or mouse anti-RNA Polymerase II (CTD4H4, Covance) and immunoprecipitations were performed using Protein A or G agarose (Invitrogen), respectively. The immunoprecipitated proteins were detected by immunoblotting using rabbit anti-Marcal1 (1:2000), rabbit anti-SMARCAL1 (1:2000), and mouse anti-RNA Polymerase II (CTD4H4 or H14, 1:500; Covance).

**Western blotting.** Detection of Marcal1 was performed according to standard protocols (8) using rabbit anti-Marcal1 antibody (1:2000). Detection of SMARCAL1 and Smarcal1 were performed with an anti-SMARCAL1 antibody (4, 9).

**ATPase activity assay.** To assay ATPase activity, HA-GFP-Marcal1 was immunoprecipitated from protein extracts of *tub-GAL4, UAST-HA-GFP-Marcal1/TM6B* flies using the monoclonal anti-HA agarose conjugate (Sigma). His-tagged human SMARCAL1 and mouse Smarcal1 were

purified from protein extracts of a stably transfected Flp-In T-Rex-293 cell lines (Invitrogen) using a His-Bind Purification Kit (Novagen/EMD). The ATPase assay was performed with the purified proteins as described (3, 10).

**Urinary creatinine and albumin assays.** Spot urine was collected from *Smarcal1*<sup>del/del</sup> and *Smarcal1*<sup>+/+</sup> mice injected with alpha-amanitin or PBS. Urinary creatinine measurement was performed using creatinine assay kit from Cayman Chemical Company (Ann Arbor) following the manufacturer's instruction. Urinary albumin measurement was performed using the bromocresol green method. Ten dilutions of albumin standards from 0 to 8 g/dl were prepared. Two microliters of standards and samples were added to a 96-well plate in duplicates and then 200  $\mu$ l of albumin reagent (Sigma) was added and mixed. After incubation at room temperature for 1 minute, the absorbance was measured at 630 nm and the concentration was calculated. Finally, albumin/creatinine ratio was calculated for each sample.

**Urinary protein and creatinine measurement.** 24-hour urine was collected from *Smarcal1*<sup>del/del</sup> (n=4) and *Smarcal1*<sup>+/+</sup> (n=4) female mice at the age of 2 and 12 months using Nalgene metabolic cages. Protein measurement was performed in duplicate using Lowry protein assay (Bio-Rad) following the manufacturer's instruction (Hercules). Urinary creatinine measurement was performed using creatinine assay kit from Cayman Chemical Company (Ann Arbor) following the manufacturer's instruction.

**Microarray gene expression analysis in human cells.** For analysis of gene expression in primary cultured human dermal fibroblasts, 5.0  $\mu$ g of total RNA from two biologically

independent replicates was extracted from two SIOD (SD8 and SD60) and three from a control skin fibroblast cell lines, labeled and hybridized to Affymetrix Human Genome U133 Plus 2.0 Arrays. CEL file data were normalized using the GCRMA package from the Bioconductor suite (11). Present-absent p values were calculated in R using the Affymetrix test statistic(12). Subsequent to deriving expression measures, an ANOVA model was fit to each genotype ( $Y = \text{Genotype} + \text{Error}$ ), where Y is the normalized expression measure for a gene on a particular microarray. The model was fit using the LIMMA R package (13). Coefficients for the linear model were estimated by least squares method. Linear contrast scores were used to compare gene lists between the genotypes. Determination of up- and down-regulation of expression is made by computing a T-statistic for SIOD and control samples, and then adjusting the variance estimate using the empirical Bayes method as implemented in the LIMMA R Package. The p-values obtained are then converted to Q-values using the LBE R package (14, 15) to control the false discovery rate (FDR) at 0.05. A pair of lists was determined as well as linear contrast values ( $\log_2$  fold changes) comparing the SIOD patients and the control. A Q-value cutoff of 0.05 was used to determine a pair of lists for the probe sets either overexpressed or underexpressed.

**Microarray gene expression analysis in flies.** For analysis of gene expression in flies, 5.0  $\mu\text{g}$  of total RNA from three biologically independent replicates was extracted from 1) *yw*, 2) *MarcalI<sup>del/del</sup>*, 3) *RpII215<sup>4</sup>/FM7*, and 4) *RpII215<sup>4</sup>/FM7;MarcalI<sup>del/del</sup>* ovaries at 20°C and from *yw* and *MarcalI<sup>del/del</sup>* at 25°C, labeled and hybridized to Affymetrix *Drosophila* Genome 2.0 arrays. Affymetrix cel file data were processed using the robust multi-array average (RMA) method as implemented in Bioconductor. The *yw* expression data from both the base and high temperature

states were used to determine a set of "expressed" transcripts using the maximum RMA value for each probe set across all individual *yw* samples. Probe sets were identified as being expressed when the maximum RMA value was greater than or equal to six—a value determined by observation of the distribution of expression values in the *yw* samples. This analysis identified 6,437 probe sets, which were subsequently analyzed and visualized in the other genotypes. Linear contrast of the RMA values for each treatment was compared by first computing the mean of RMA values with each treatment group and then comparing different pairs of groups of interest. The heatmap was generated by sorting the differenced values and plotting each probe set. The density plots are kernel probability density estimates of the linear contrast scores for the ensemble of 6,437 probe sets, determined to be expressed in *yw*. FlyBase IDs provided by the Affymetrix website were used to query the FlyBase information.

**RNA sequencing and data analysis.** RNA was extracted from the liver of three *Smarcal1*<sup>+/+</sup> and three *Smarcal1*<sup>del/del</sup> female mice (3-4 months of age) at room temperature as well as after 1 hour at 39.5°C. The RNA sequencing libraries were constructed and sequenced using the whole transcriptome shotgun sequencing procedure, as previously described (16-18). The sequencing was performed using two lanes per genotype of an Illumina Genome Analyzer II following the manufacturer's instructions. Image analysis and base calling were done by the GA pipeline v1.0 (Illumina, Hayward, CA) using phasing and matrix values calculated from a control phiX174 library run on each flow cell. Raw quality scores were calibrated by alignment to the reference mouse genome (NCBI build 37, mm9) using ELAND (Illumina, Hayward, CA). Short read sequences obtained from the Illumina Genome Analyzer for each sample were mapped to the reference mouse genome (NCBI build 37, mm9) plus a database of known exon junctions (19)

using MAQ in paired end mode (20). The exon junction sequences consisted of N-1 nucleotides of the donor exon ‘spliced’ to N-1 nucleotides of the acceptor exon for every known pair of exons in the mouse transcriptome, where N is the read length. This was designed to rescue reads that would not map to the mouse reference genome due to their spanning a splice site. The maximum insert size (-a parameter) to MAQ was 500. Mouse sequence summary count data were log<sub>2</sub> scaled. All genes with a count per kilobase summary greater than 4 (log<sub>2</sub> >2) in either temperature condition in *Smarcal1*<sup>+/+</sup> samples were identified as well enough represented to be considered in our analysis. The mean log<sub>2</sub> scaled expression summary (across both *Smarcal1*<sup>+/+</sup> and *Smarcal1*<sup>del/del</sup>) was determined for each temperature state. The deviation of each sample (computed by subtracting the observed value from the mean) for the base temperature condition was subsequently determined and plotted in the heatmap. For both heatmaps, the sort order was computed as follows: the difference between *Smarcal1*<sup>+/+</sup> and *Smarcal1*<sup>del/del</sup> in each treatment condition was divided by the log<sub>2</sub> expression value in the *Smarcal1*<sup>+/+</sup> in the baseline temperature condition. The resulting scores for each treatment condition were averaged and then the genes were sorted according to this score for difference in the high temperature state. The density plots represent the distribution of expression difference values for each temperature state between the *Smarcal1*<sup>+/+</sup> and *Smarcal1*<sup>del/del</sup>. The same genes plotted in the heatmap are represented in the line plot (probability density estimate plot).

**Gene Ontology (GO) analysis.** GO analysis was performed using the Database for Annotation, Visualization and Integrated Discovery (DAVID ) v6.7 (21, 22). Differentially expressed genes (q-value <0.05) between *yw* vs. *Marcal1*<sup>del/del</sup>, *yw* vs. *RpII215*<sup>4</sup>, and *yw* vs. *RpII215*<sup>4</sup>; *Marcal1*<sup>del/del</sup> ovaries at 20°C, *yw* vs. *Marcal1*<sup>del/del</sup> ovaries at 25°C, differentially

expressed genes (fold-change > 2) between *Smarca11*<sup>+/+</sup> vs. *Smarca11*<sup>del/del</sup> mouse livers at 20°C, *Smarca11*<sup>+/+</sup> vs. *Smarca11*<sup>del/del</sup> mouse livers at 39.5°C, and differentially expressed genes (q-value <0.05 and fold-change > 2) between control vs. SIOD fibroblasts, were analyzed for their enrichment in biological process GO biological process annotation terms at all levels.

**DNA adenine methyltransferase analysis of Marca11 binding.** Full-length *Marca11* was cloned into pNDamMyc such that Dam was fused in frame with the amino terminus of Marca11. This construct was transfected into Kc167 cells as previously described (23). For microarray analyses, we used a 385K tiling array (NimbleGen Systems/Roche, Madison WI), which was designed by the group of Bas van Steensel (NKI – Amsterdam, The Netherlands). This array contained 60-mer oligomers roughly every 300 base pairs across the entire nonrepetitive part of the *Drosophila* genome (release 4.3). We made two independent biological replicate experiments that were differentially labeled and in parallel hybridized to the microarrays. The individual replicates were normalized, using Lowess Normalization methods. For each replicate, we defined Marca11 binding sites as described (23). First, we removed random noise by calculating a running median with a window size of 15 consecutive probes (i.e. ~4.5 Kbp). We defined a Marca11 binding site as: at least two consecutive probes along the DNA template that have a log<sub>2</sub>-transformed binding ratio (N-Dam-Marca11/Dam) higher than an empirically determined threshold. This threshold was determined on randomly shuffled data, giving an estimate of the FDR. This FDR was defined as the number of binding sites in the random data / the number of sites in observed data. We chose a threshold that equals the standard deviation of log<sub>2</sub>-transformed binding ratios across all probes on the microarray, giving FDRs of ~1% and 0% for replicates 1 and 2, respectively, indicating that our definition of a binding site is highly stringent.

Next, we further increased confidence in our data by selecting only binding sites that were identified in both replicates. Finally, we identified target genes using the start and end coordinates of Marcal1 binding sites and FlyBase R4.3 gene annotation ([www.flybase.org](http://www.flybase.org)). As the minimal requirements for a target gene, we chose at least one nucleotide overlap with at least one Marcal1 binding site. We used this list of target genes to divide previously published data into target and non-target genes. These data sets include chromatin accessibility (24), gene expression (25), DNA replication timing(25), histone acetylation (26), histone methylation (23), and a non-specific antibody control (rabbit anti-IgG) (23). Data derived from Greil *et al.* (24) and Schubeler *et al.* (25, 26) compared 638 targets to 4718 non-targets, and data from Tolhius *et al.* (23) compared 1026 targets to 8964 non-targets. Density distribution plots, statistical tests, and alignment plots of Marcal1 binding around transcription start and termination sites of 1822 target genes were made with R ([www.r-project.org](http://www.r-project.org)).



## Supplementary Figures

**Supplementary Figure S1. Temporospatial expression of Marcal1 in *Drosophila* cells and tissues.** (A) Photograph of S2 cells expressing GFP-tagged Marcal1. (B) Photograph of an ovarian nurse cell dissected from a transgenic fly expressing GFP-tagged Marcal1. (C) Photograph of immunofluorescently detected endogenous Marcal1 expression in the wing imaginal disc. The upper panel was treated with anti-Marcal1 serum and the lower panel with preimmune serum. (D) Northern blot analysis of *Marcal1* expression during *Drosophila* development.

**Supplementary Figure S2. Generation of a fly model for the study of Marcal1 function.** (A) Diagram showing that imprecise excision of P element *KG9850*, which is inserted within exon 1 of *Marcal1*, was used to generate a fly line deficient for Marcal1 (*Marcal1<sup>del/del</sup>*). The mutation generated by this imprecise excision was c.673\_1258delinsATGATGAAATAACATCA, p.225Mfs228X. (B) Northern blot analysis showing the absence of Marcal1 mRNA in *Marcal1<sup>del/del</sup>* flies. 3 µg of mRNA were used for Northern blot analysis. (C) Immunoblot analysis showing the absence of Marcal1 protein in *Marcal1<sup>del/del</sup>* flies. One *yw*, one *Marcal1<sup>del/del</sup>*, and one *tub>GFP-Marcal1* (*tub-GAL4, UAS-HA-GFP-Marcal11/TM6B*) male fly (about 10 µg of protein of extract) were used. The rabbit polyclonal anti-Marcal1 antibody was used to probe the blot.

**Supplementary Figure S3.** Outline for deriving the *Smarcal1* knockout targeting vector from a bacterial artificial chromosome (BAC) via recombineering. The black triangles denote *LoxP* sites and the yellow triangles denote *FRT* sites.

**Supplementary Figure S4. Generation of a *Smarcal1* deficient mouse.** (A) Diagram of the restriction map for the *Smarcal1* gene after insertion of the cKO construct. *LoxP* sites are shown in black while *FRT* sites are shown in yellow. Insertion of the 5' *loxP* site introduces an Xho I site and insertion of the neo cassette introduces a *PflI* I and *Pac* I site. Exons 2 and 3, which contain the initiating ATG site, nuclear localization signal, RPA binding site and a HARP domain, are removed when mice are crossed to Cre-expressing mice. The location of the Southern probes and the PCR genotyping primers are shown below the restriction maps. (B) Southern analysis was used to detect integration of the cKO construct, removal of neo cassette, and removal of exons 2 and 3. The expected restriction fragments for each digestion are shown in the table. (C) Southern analysis of *SvEv* embryonic stem (ES) cells after integration of the *Smarcal1* cKO construct. After restriction enzyme digestion with Kpn I and Pac I, probing with the 5' probe shows an 18.5 kb band corresponding to the *Smarcal1* wild-type allele and a 4.2 kb band in those cells with the *Smarcal1 loxP* allele. Probing the membrane with the 3' probe shows an 18.5 kb band corresponding to the *Smarcal1* wild-type allele and a 16.3 kb band corresponding to the *Smarcal1* floxed allele. The lanes marked with an asterisk represent ES cells that are heterozygous for the conditional allele (*Smarcal1*<sup>+/*loxP*</sup>). (D) Depiction of the floxed *Smarcal1* allele used to generate the *Smarcal1*<sup>del</sup> allele. The *Smarcal1*<sup>del</sup> allele lacks exons 2 and 3 and thus encodes a protein with deletion of the amino terminal nuclear localization signal, RPA binding site and most of the first HARP domain. Noncoding exons are shown in yellow; exons encoding the HARP domains are shown in light blue; and exons encoding the SNF2 domain are shown in gray. (E) Southern analysis of mouse tail DNA after recombination of the *loxP* sites upon expression of Cre recombinase. Mice carrying a *GDF9-Cre* transgene(2), which drives

oocyte specific expression of Cre recombinase, were crossed to the *Smarcal1*<sup>loxP/+</sup> mice to generate the *Smarcal1*<sup>del</sup> allele. After restriction enzyme digestion with Kpn I and Xmn I, probing with the 3' probe shows a 7.65 kb band corresponding to the *Smarcal1* wild-type allele and a 5.25 kb allele representing the knockout allele. The lanes marked with an asterisk represent mice that are heterozygous at the *Smarcal1* locus (*Smarcal1*<sup>+/del</sup>). (F) PCR amplification products expected for genotyping of the *Smarcal1*<sup>LoxP</sup> and *Smarcal1*<sup>del</sup> alleles. (G) Results of the PCR genotyping for the floxed *Smarcal1* allele (*Smarcal1*<sup>LoxP</sup>). (H) Results of the PCR genotyping for the deleted *Smarcal1* allele (*Smarcal1*<sup>del</sup>).

**Supplementary Figure S5. Expression analyses of the *Smarcal1* deletion (*Smarcal1*<sup>del</sup>) and wild type (*Smarcal1*<sup>+</sup>) mRNA and protein.** (A) Photograph of an agarose gel showing that by RT-PCR analysis of mRNA isolated from *Smarcal1*<sup>+</sup>, *Smarcal1*<sup>del/+</sup> and *Smarcal1*<sup>del/del</sup> mouse embryonic fibroblasts (MEFs), the *Smarcal1*<sup>del</sup> allele produces mRNA by splicing from exon 1 to 4. The PCR primer pair used had a forward primer in exon 1 and a reverse primer in exon 4. (B) Photograph of an immunoblot showing that the *Smarcal1*<sup>del</sup> allele in MEFs does not produce *Smarcal1* protein detectable by antiserum raised against the amino terminal of *Smarcal1*.  $\square$ -tubulin is shown as a loading control. (C) Photograph of an immunoblot showing that expression of the wild type and deleted *Smarcal1* with a carboxy terminal V5-tag in HEK 293 cells produces similar steady state levels of each protein. The proteins were detected using polyclonal anti-V5 serum. GAPDH is shown as a loading control. (D) Photographs showing that by immunofluorescent analysis, the *Smarcal1*<sup>+</sup> and *Smarcal1*<sup>del</sup> proteins localize to the nucleus. Bar = 20 $\mu$ m. (E) Graph of the DNA-dependent ATP hydrolysis activity of the *Smarcal1*<sup>del</sup> protein

relative to that of Smarcal1<sup>+</sup> protein. Calf intestinal phosphatase was used as a positive control. The error bars represent one standard deviation.

**Supplementary Figure S6. Phenotypic comparison of *Smarcal1*<sup>+/+</sup> and *Smarcal1*<sup>del/del</sup> mice.**

(A) Graphs comparing the body weights and lengths of newborn (P0) *Smarcal1*<sup>+/+</sup> (n=20), *Smarcal1*<sup>+del</sup> (n=55), and *Smarcal1*<sup>del/del</sup> (n=20) littermates. The error bars represent one standard deviation. None of the differences in these graphs are statistically significant. (B) Genotypes of the offspring of *Smarcal1*<sup>+del</sup> x *Smarcal1*<sup>+del</sup> parents. Note that the genotypes of the offspring have a Mendelian ratio both at birth and at weaning. (C) Graphs comparing the body weights and lengths for each sex of 6 month-old *Smarcal1*<sup>+/+</sup> (9 males and 21 females) and *Smarcal1*<sup>del/del</sup> (31 males and 24 females) littermates. The error bars represent one standard deviation. None of the differences in these graphs are statistically significant. (D-G) Photographs of representative H&E staining of the proximal tibia of 6 month-old *Smarcal1*<sup>+/+</sup> (D and E) and *Smarcal1*<sup>del/del</sup> (F and G) mice. Panels E and G are higher magnifications of the boxed areas on panels D and F, respectively. Note similar structure and cellularity of the growth plates between *Smarcal1*<sup>+/+</sup> and *Smarcal1*<sup>del/del</sup> mice. Bar = 100µm. (H-K) Photographs of representative H&E staining of the kidney cortex from 6 month-old *Smarcal1*<sup>+/+</sup> (H and I) and *Smarcal1*<sup>del/del</sup> (J and K) mice. Panels I and K are higher magnifications of the glomeruli boxed on panels H and J, respectively. Note similar glomeruli and tubular structures between *Smarcal1*<sup>+/+</sup> and *Smarcal1*<sup>del/del</sup> mice. Bar = 100 µm. (L) Graphs comparing the urinary excretion of protein over 24-hours by 2 and 12 month-old *Smarcal1*<sup>+/+</sup> (n=4) and *Smarcal1*<sup>del/del</sup> (n=4) mice. The protein excretion was normalized to the urinary creatinine. The error bars represent one standard deviation. (M) Plots show the representative FACS analysis of the thymus from *Smarcal1*<sup>+/+</sup> (n=3) and *Smarcal1*<sup>del/del</sup>

(n=3) mice for different lymphocyte subsets. Thymocytes were initially analyzed for T-cell developmental stages based on CD4 and CD8 staining. Double negative (CD4<sup>-</sup>CD8<sup>-</sup>) cells were further resolved based on CD44 and CD25 expression into DN1 (CD44<sup>+</sup>CD25<sup>-</sup>), DN2 (CD44<sup>+</sup>CD25<sup>+</sup>), DN3 (CD44<sup>-</sup>CD25<sup>+</sup>) and DN4 (CD44<sup>-</sup>CD25<sup>-</sup>) fractions. (N) Quantification of lymphocyte subsets analyzed in panel m. The error bars represent one standard deviation. (O) Plots show the representative FACS analysis of the spleen from *Smrca11*<sup>+/+</sup> (n=3) and *Smrca11*<sup>del/del</sup> (n=3) mice for different lymphocyte subsets. Splenic B and T cells were initially resolved based on expression of B220 (CD45R) and TCRαβ. Subsequently, T cells (TCR<sup>+</sup>) were further resolved into CD4<sup>+</sup> and CD8<sup>+</sup> T-cell subsets. Note that there is a significantly reduction of B cells (B220<sup>+</sup>) in *Smrca11*<sup>del/del</sup> spleen. The error bars represent one standard deviation.

**Supplementary Figure S7.** Photographs showing immunofluorescent co-localization of Marcal1 (green) with panacetyl-histone H4 (AcH4; red) on *Drosophila* polytene chromosomes. HA tagged Marcal1 was in transgenic flies (*tub-GAL4, UAS-HA-GFP-Marcal1*) and detected with an anti-HA monoclonal antibody.

**Supplementary Figure S8. Photographs of *Drosophila* wings showing the extra wing veins induced by expression of Marcal1 (A) and SMARCAL1 (B).** Marcal1 and SMARCAL1 expression were driven in transgenic flies by the GAL4-UAS system. No extra wing veins are observed with the UAS-Marcal1 or UAS-SMARCAL1 constructs alone or with the GAL4 drivers (*tubulin>GAL4* or *MS1096>GAL4*) alone. Also, note the absence of ectopic wing veins

when the expressed protein product has no ATPase activity (*Marcal1*<sup>K275R</sup> and *SMARCAL1*<sup>R586W</sup>) (3, 27).

### **Supplementary Figure S9. Epistatic interaction of Marcal1 and SMARCAL1**

**overexpression with mutations of RNA polymerase II (RpII).** Photographs of representative wings showing the effect of several *RpII215* and *RpII140* mutations on the extra wing vein phenotype. Quantification of wing margin scalloping in *C96-GAL4, UAS-Hrs* flies was used to control for nonspecific interactions between the various mutations and the GAL4-UAS system.

### **Supplementary Figure S10. Verification of microarray gene expression and transcriptome**

**sequencing data by qRT-PCR.** For each gene expression array and transcriptome experiment, genes involved in specific pathways that seemed to be deregulated in *SMARCAL1*-deficient cells or organisms were chosen for validation of mRNA levels by qRT-PCR. These pathways include cell cycle genes for the human gene expression array, egg development genes for the *Drosophila* gene expression array, and stress response genes for the mouse transcriptome. The RNA samples used for these validation studies were aliquots from the same biological replicates used for the gene expression array and transcriptome experiments. **(A)** Graphs of relative quotients (RQ) for steady state mRNA levels of 8 genes in cultured dermal fibroblasts derived from two SIOD patients (SD8 and SD60) and one unaffected control. The analysis was performed using human cell cycle PCR array (SABiosciences) and data was normalized to *B2M*, *HPRT1*, *RPL13A*, *GAPDH*, and *ACTB* mRNA levels and plotted relative to the unaffected control. **(B)** Graphs of the RQs for steady state mRNA levels of 7 genes in ovaries dissected from *Marcal1*<sup>del/del</sup> and *yw* flies. The data was normalized to *Gapdh2* mRNA levels and plotted relative to the *yw* control

flies. (C) Graphs of RQs for steady state mRNA levels of 7 genes in livers dissected from *Smarcal1<sup>del/del</sup>* and *Smarcal1<sup>+/+</sup>* mice placed at an ambient temperature of 39.5°C for 1 hour. The analysis was performed using the mouse heat shock PCR array (SABiosciences) and data was normalized to *Gusb*, *Hprt*, *Hsp90ab1*, *Gapdh*, and *Actb* mRNA levels and plotted relative to the unaffected control. All error bars represent one standard deviation.

**Supplementary Figure S11. *SMARCAL1* deficiency causes abnormal expression of heat stress genes.** Volcano plots of qRT-PCR comparison of stress gene expression in SIOD dermal fibroblasts (SD120 and SD123) to that in control unaffected dermal fibroblasts after one hour incubation at 43°C followed by one hour incubation at 37°C. Each plot is based on three biological replicates.

**Supplementary Figure S12. Effect of *Marcal1* deficiency on expression of heat stress genes and proteins in 1-3 day old *Drosophila* females.** (A) Graphs showing qRT-PCR measurement of stress gene mRNA levels in *Marcal1<sup>del/del</sup>* flies relative to *yw* control flies. The duration of heat shock at 37°C and recovery at 20°C is shown above the graphs. The values in each graph represent the mean of three independent experiments assessed in triplicate. The data was normalized to *Gapdh2* mRNA levels. The error bars represent one standard deviation. (B) Photographs of immunoblots showing the expression of stress gene proteins in *Marcal1<sup>del/del</sup>* flies and *yw* control flies. The duration of heat shock at 37°C and recovery at 20°C is shown above.  $\beta$ -tubulin was used as a loading control. Abbreviations: *del*, *Marcal1<sup>del/del</sup>* flies; RQ, relative quotient.

**Supplementary Figure S13. Effect of knocking down RpII components in *SMARCAL1* and *Smarcal1* deficient fibroblasts.** (A) The ratio of WST-1 assay measurement of *SMARCAL1*<sup>del/del</sup> (SD31) and unaffected control dermal fibroblasts 72 and 96 hours following electroporation with non-targeting or *POLR2A*- and *POLR2B*-targeting shRNAs. The values in each graph represent the mean of 3 independent experiments and were normalized to the non-targeting values. (B) As measured by qRT-PCR, *POLR2A* and *POLR2B* mRNA levels were reduced approximately by 50-80% and 45-50%, respectively. The data was normalized to *GAPDH* mRNA levels and to the non-targeting control. (C) The ratio of WST-1 assay measurement of *Smarcal1*<sup>del/del</sup> and *Smarcal1*<sup>+/+</sup> MEFs 48 and 96 hours following electroporation with non-targeting or *Polr2a*-targeting siRNAs (*Polr2a-1* and *Polr2a-3*). The values in each graph represent the mean of 3 independent experiments and were normalized to the non-targeting values. (D) As measured by qRT-PCR, *Polr2a* mRNA levels were reduced approximately by 55-65% for siRNA duplex 1 and 70% for siRNA duplex 3. The data was normalized to *Gapdh* mRNA levels and to the non-targeting control. The error bars throughout represent one standard deviation.

**Supplementary Figure S14. Treatment of *Smarcal1*<sup>del/del</sup> mice with  $\alpha$ -amanitin does not recapitulate T-cell deficiency in SIOD.** (A) Plots show the representative FACS analysis of the thymus from *Smarcal1*<sup>+/+</sup> (n=3) and *Smarcal1*<sup>del/del</sup> (n=5) mice treated with  $\alpha$ -amanitin for different developmental T-cell subsets. Thymocytes were initially analyzed for T-cell developmental stages based on CD4 and CD8 staining. Double negative (CD4<sup>-</sup>CD8<sup>-</sup>) cells were further resolved based on CD44 and CD25 expression into DN1 (CD44<sup>+</sup>CD25<sup>-</sup>), DN2 (CD44<sup>+</sup>CD25<sup>+</sup>), DN3 (CD44<sup>-</sup>CD25<sup>+</sup>) and DN4 (CD44<sup>-</sup>CD25<sup>-</sup>) fractions. (B) Quantification of T-cell subsets analyzed in panel A. (C) Plots show the representative FACS analysis of the spleen from *Smarcal1*<sup>+/+</sup> (n=3) and *Smarcal1*<sup>del/del</sup> (n=5) mice treated with  $\alpha$ -amanitin for different



lymphocyte subsets. Splenic B and T cells were initially resolved based on expression of B220 (CD45R) and TCR $\alpha\beta$ . Subsequently, T cells (TCR $\alpha\beta$ ) were further resolved into CD4<sup>+</sup> and CD8<sup>+</sup> T-cell subsets. **(D)** Quantification of T-cell subsets analyzed in panel C. Note that compared to untreated mice (Supplementary Material, Fig. S6), treatment with  $\alpha$ -amanitin did not significantly alter the representation of the lymphocyte subsets. The error bars represent one standard deviation.

## Supplementary References

1. Nagy, A., Gertsenstein, M., Vintersten, K. and Behringer, R. (2003) *Manipulating the Mouse Embryo*. Cold Spring Harbor Press, Cold Spring Harbor.
2. Lan, Z.J., Xu, X. and Cooney, A.J. (2004) Differential oocyte-specific expression of Cre recombinase activity in GDF-9-iCre, Zp3cre, and Msx2Cre transgenic mice. *Biol. Reprod.*, **71**, 1469-1474.
3. Elizondo, L.I., Cho, K.S., Zhang, W., Yan, J., Huang, C., Huang, Y., Choi, K., Sloan, E.A., Deguchi, K., Lou, S. *et al.* (2009) Schimke immuno-osseous dysplasia: SMARCAL1 loss-of-function and phenotypic correlation. *J. Med. Genet.*, **46**, 49-59.
4. Clewing, J.M., Fryssira, H., Goodman, D., Smithson, S.F., Sloan, E.A., Lou, S., Huang, Y., Choi, K., Lucke, T., Alpay, H. *et al.* (2007) Schimke immunoosseous dysplasia: suggestions of genetic diversity. *Hum. Mutat.*, **28**, 273-283.
5. Zink, D. and Paro, R. (1995) Drosophila Polycomb-group regulated chromatin inhibits the accessibility of a trans-activator to its target DNA. *Embo J.*, **14**, 5660-5671.
6. Ashburner, M. (1989) *Drosophila: A Laboratory Handbook and Manual*. Cold Spring Harbor Laboratory Press, Plainview.
7. Deguchi, K., Clewing, J.M., Elizondo, L.I., Hirano, R., Huang, C., Choi, K., Sloan, E.A., Lucke, T., Marwedel, K.M., Powell, R.D., Jr. *et al.* (2008) Neurologic phenotype of Schimke immuno-osseous dysplasia and neurodevelopmental expression of SMARCAL1. *J. Neuropathol. Exp. Neurol.*, **67**, 565-577.
8. Harlow, E. and Lane, D. (1988) *Antibodies: A Laboratory Manual*. Cold Spring Harbor Laboratory Press, Cold Spring Harbor.

9. Elizondo, L.I., Huang, C., Northrop, J.L., Deguchi, K., Clewing, J.M., Armstrong, D.L. and Boerkoel, C.F. (2006) Schimke immuno-osseous dysplasia: a cell autonomous disorder? *Am. J. Med. Genet. A*, **140**, 340-348.
10. Zhao, K., Wang, W., Rando, O.J., Xue, Y., Swiderek, K., Kuo, A. and Crabtree, G.R. (1998) Rapid and phosphoinositol-dependent binding of the SWI/SNF-like BAF complex to chromatin after T lymphocyte receptor signaling. *Cell*, **95**, 625-636.
11. Muse, G.W., Gilchrist, D.A., Nechaev, S., Shah, R., Parker, J.S., Grissom, S.F., Zeitlinger, J. and Adelman, K. (2007) RNA polymerase is poised for activation across the genome. *Nat. Genet.*, **39**, 1507-1511.
12. Fritsch, C., Brown, J.L., Kassis, J.A. and Muller, J. (1999) The DNA-binding polycomb group protein pleiohomeotic mediates silencing of a Drosophila homeotic gene. *Development*, **126**, 3905-3913.
13. Elfring, L.K., Daniel, C., Papoulas, O., Deuring, R., Sarte, M., Moseley, S., Beek, S.J., Waldrip, W.R., Daubresse, G., DePace, A. *et al.* (1998) Genetic analysis of brahma: the Drosophila homolog of the yeast chromatin remodeling factor SWI2/SNF2. *Genetics*, **148**, 251-265.
14. Dalmaso, C., Broet, P. and Moreau, T. (2005) A simple procedure for estimating the false discovery rate. *Bioinformatics*, **21**, 660-668.
15. Storey, J.D. and Tibshirani, R. (2003) Statistical significance for genomewide studies. *Proc. Natl Acad. Sci. USA*, **100**, 9440-9445.
16. Shah, S.P., Morin, R.D., Khattra, J., Prentice, L., Pugh, T., Burleigh, A., Delaney, A., Gelmon, K., Guliany, R., Senz, J. *et al.* (2009) Mutational evolution in a lobular breast tumour profiled at single nucleotide resolution. *Nature*, **461**, 809-813.

17. Shah, S.P., Kobel, M., Senz, J., Morin, R.D., Clarke, B.A., Wiegand, K.C., Leung, G., Zayed, A., Mehl, E., Kalloger, S.E. *et al.* (2009) Mutation of FOXL2 in granulosa-cell tumors of the ovary. *N. Engl. J. Med.*, **360**, 2719-2729.
18. Morin, R.D., Johnson, N.A., Severson, T.M., Mungall, A.J., An, J., Goya, R., Paul, J.E., Boyle, M., Woolcock, B.W., Kuchenbauer, F. *et al.* (2010) Somatic mutations altering EZH2 (Tyr641) in follicular and diffuse large B-cell lymphomas of germinal-center origin. *Nat. Genet.*, **42**, 181-185.
19. Morin, R., Bainbridge, M., Fejes, A., Hirst, M., Krzywinski, M., Pugh, T., McDonald, H., Varhol, R., Jones, S. and Marra, M. (2008) Profiling the HeLa S3 transcriptome using randomly primed cDNA and massively parallel short-read sequencing. *Biotechniques*, **45**, 81-94.
20. Li, H., Ruan, J. and Durbin, R. (2008) Mapping short DNA sequencing reads and calling variants using mapping quality scores. *Genome Res.*, **18**, 1851-1858.
21. Dennis, G., Jr., Sherman, B.T., Hosack, D.A., Yang, J., Gao, W., Lane, H.C. and Lempicki, R.A. (2003) DAVID: Database for Annotation, Visualization, and Integrated Discovery. *Genome Biol.*, **4**, P3.
22. Huang da, W., Sherman, B.T. and Lempicki, R.A. (2009) Systematic and integrative analysis of large gene lists using DAVID bioinformatics resources. *Nat. Protoc.*, **4**, 44-57.
23. Tolhuis, B., de Wit, E., Muijters, I., Teunissen, H., Talhout, W., van Steensel, B. and van Lohuizen, M. (2006) Genome-wide profiling of PRC1 and PRC2 Polycomb chromatin binding in *Drosophila melanogaster*. *Nat. Genet.*, **38**, 694-699.
24. Greil, F., van der Kraan, I., Delrow, J., Smothers, J.F., de Wit, E., Bussemaker, H.J., van Driel, R., Henikoff, S. and van Steensel, B. (2003) Distinct HP1 and Su(var)3-9 complexes bind

to sets of developmentally coexpressed genes depending on chromosomal location. *Genes. Dev.*, **17**, 2825-2838.

25. Schubeler, D., MacAlpine, D.M., Scalzo, D., Wirbelauer, C., Kooperberg, C., van Leeuwen, F., Gottschling, D.E., O'Neill, L.P., Turner, B.M., Delrow, J. *et al.* (2004) The histone modification pattern of active genes revealed through genome-wide chromatin analysis of a higher eukaryote. *Genes Dev.*, **18**, 1263-1271.

26. Schubeler, D., Scalzo, D., Kooperberg, C., van Steensel, B., Delrow, J. and Groudine, M. (2002) Genome-wide DNA replication profile for *Drosophila melanogaster*: a link between transcription and replication timing. *Nat. Genet.*, **32**, 438-442.

27. Deuring, R., Fanti, L., Armstrong, J.A., Sarte, M., Papoulas, O., Prestel, M., Daubresse, G., Verardo, M., Moseley, S.L., Berloco, M. *et al.* (2000) The ISWI chromatin-remodeling protein is required for gene expression and the maintenance of higher order chromatin structure in vivo. *Mol. Cell*, **5**, 355-365.

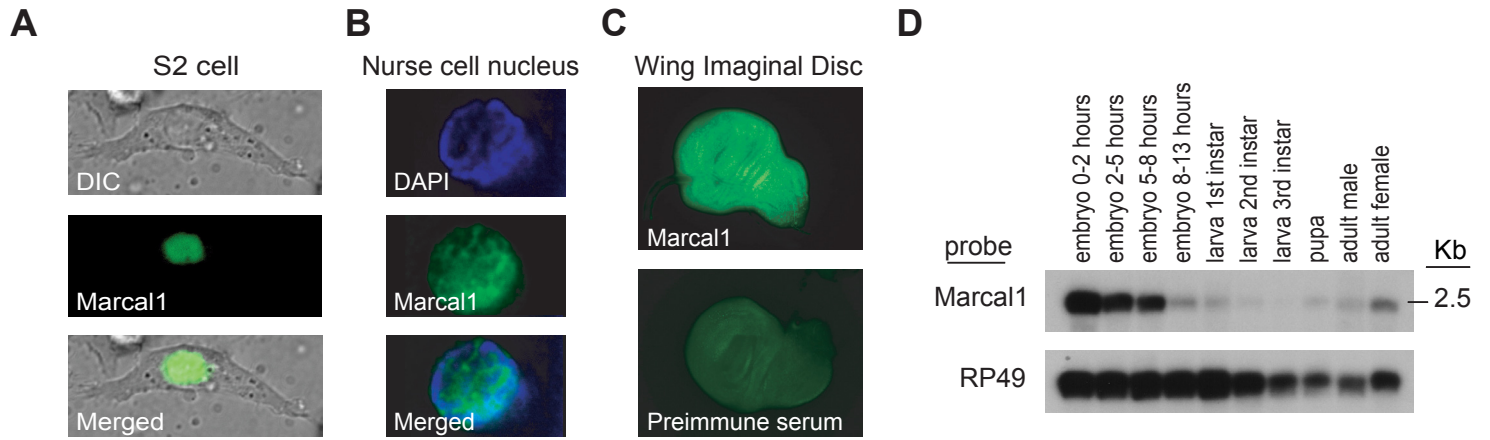

**A**

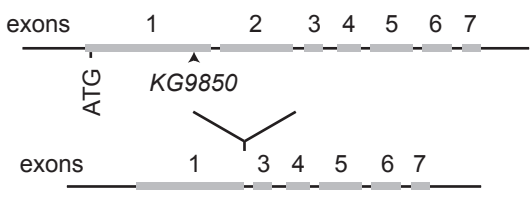

**B**

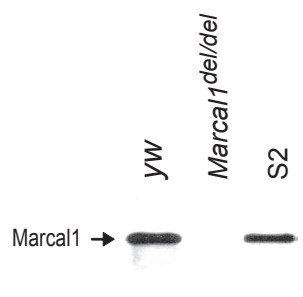

**C**

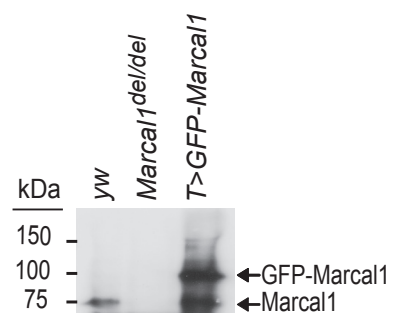

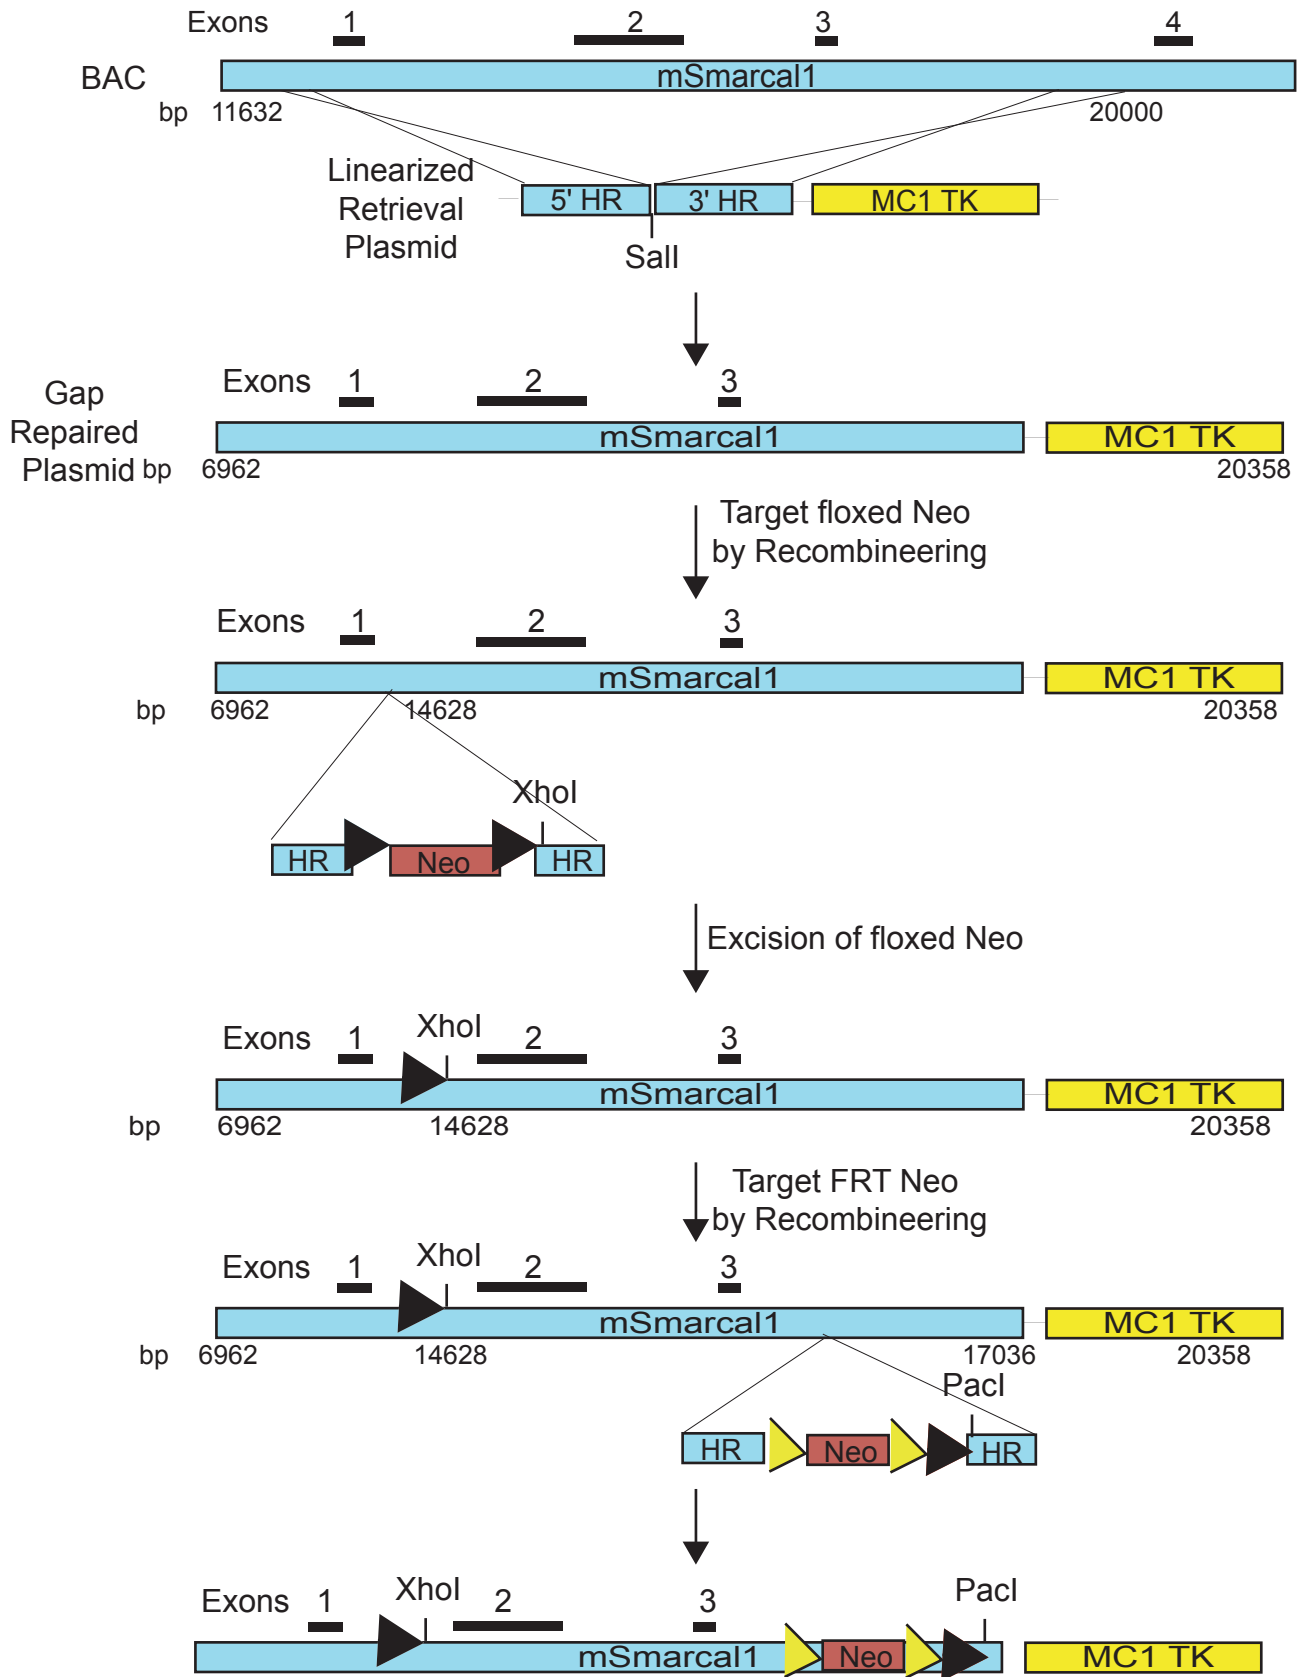



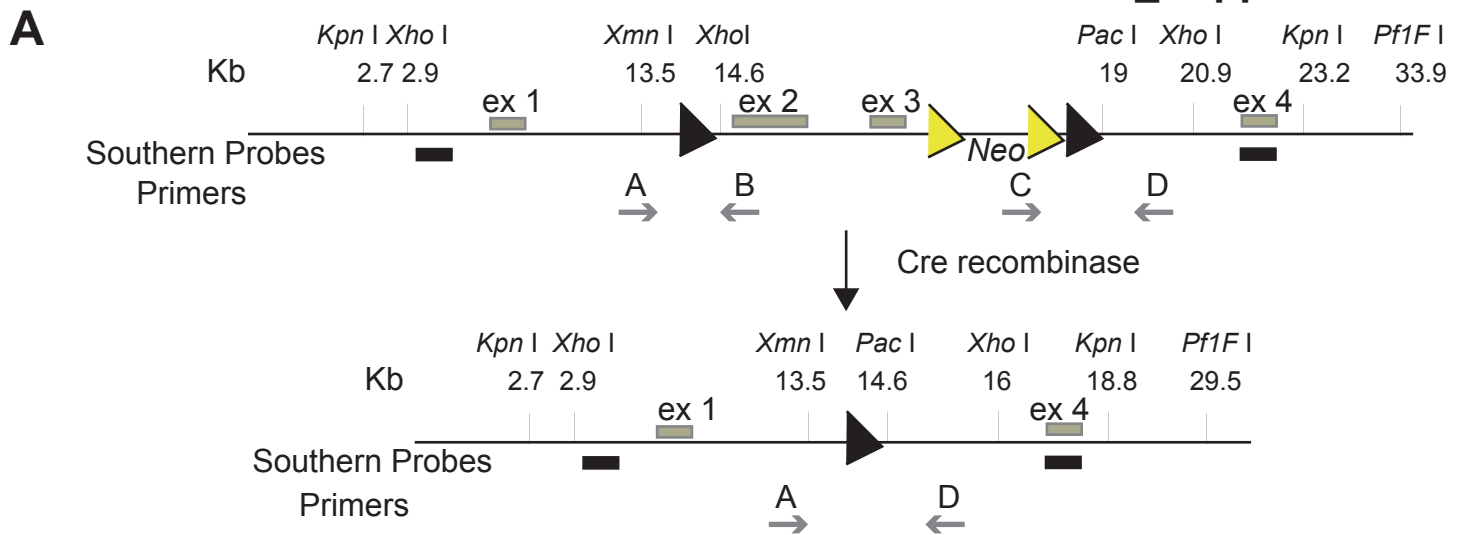

**B** Fragment sizes (Kb) by Southern analysis for wild type (wt) and transgenic (Tg) *Smarcal1* alleles

| Genotype | Integration  |                            | Removal of Neo |                             | Removal of Exons 2 & 3 |              |                            |
|----------|--------------|----------------------------|----------------|-----------------------------|------------------------|--------------|----------------------------|
|          | <i>Xho</i> I | <i>Kpn</i> I/ <i>Pac</i> I | Flp            | <i>Kpn</i> I/ <i>Pfl</i> FI | Cre                    | <i>Xho</i> I | <i>Kpn</i> I/ <i>Xmn</i> I |
| 5' Probe | wt           | 16                         | -              | 15.4                        | -                      | 11.7         | nd                         |
|          | Tg           | 11.7                       | +              | 18.5                        | +                      | 13.6         | nd                         |
| 3' Probe | wt           | nd                         | -              | 5.2                         | -                      | nd           | 7.65                       |
|          | Tg           | nd                         | +              | 18.5                        | +                      | nd           | 5.25                       |

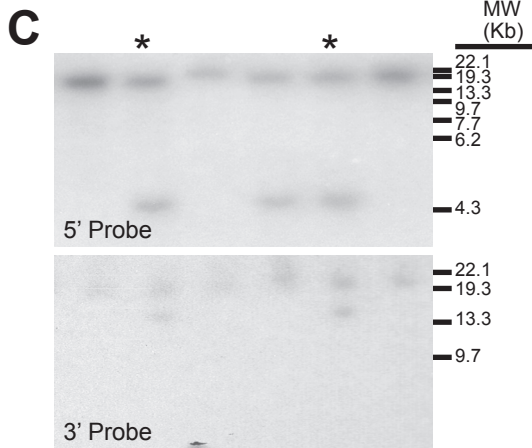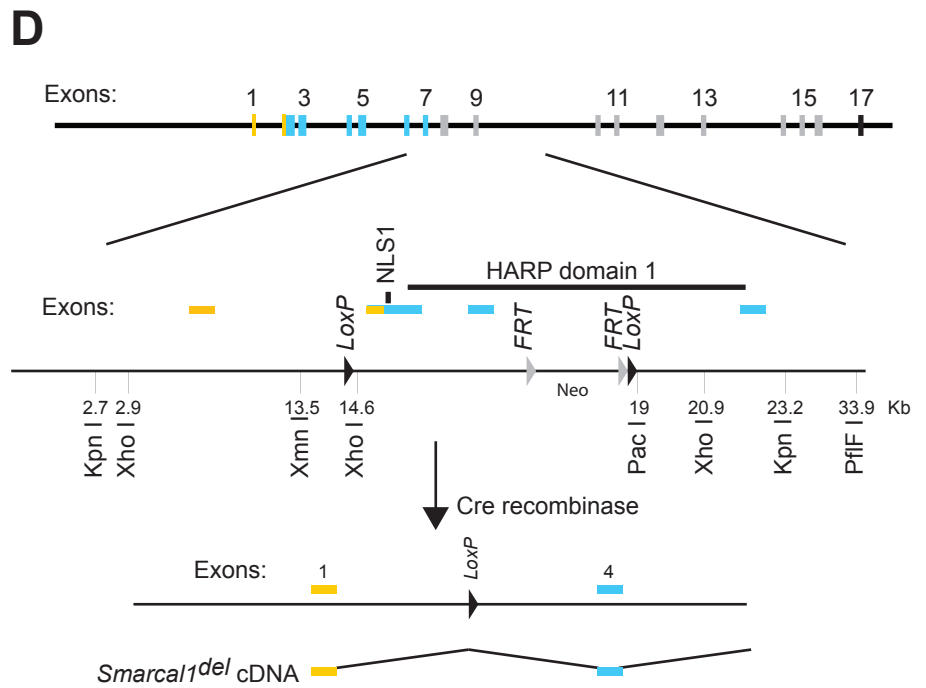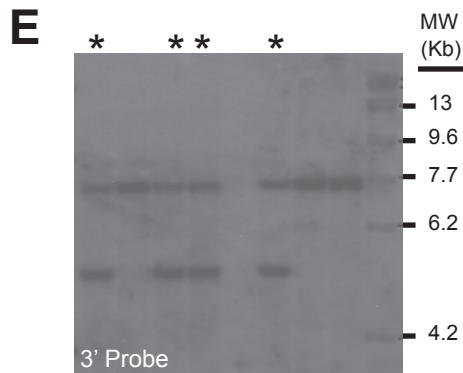

**F** PCR products of wt and tg *Smarcal1* alleles

| Primers | Genotype | <i>Smarcal1</i> allele |        |
|---------|----------|------------------------|--------|
|         |          | LoxP                   | del    |
| A & B   | wt       | 340 bp                 | 340 bp |
|         | Tg       | 374 bp                 | -      |
| C & D   | wt       | -                      | -      |
|         | Tg       | 850 bp                 | -      |
| A & D   | wt       | -                      | -      |
|         | Tg       | -                      | 637 bp |

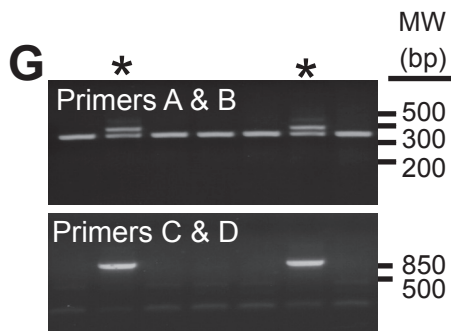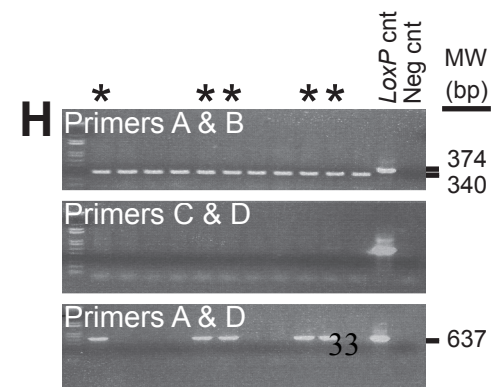

**A**

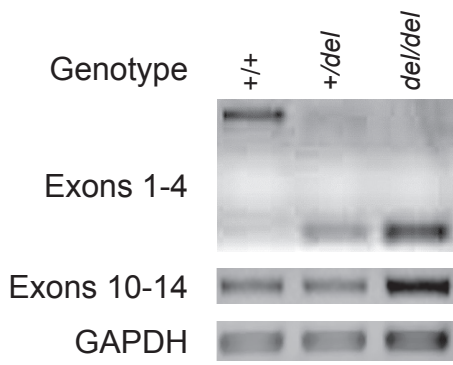

**B**

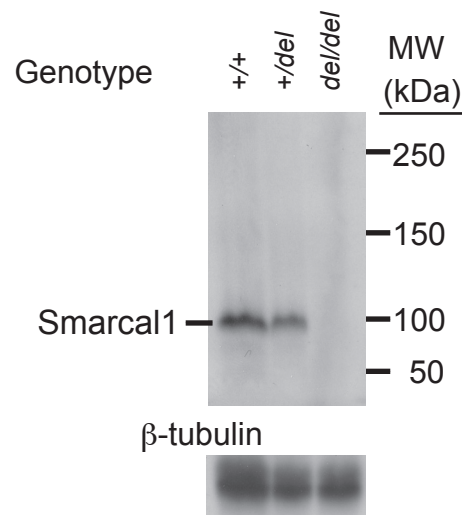

**C**

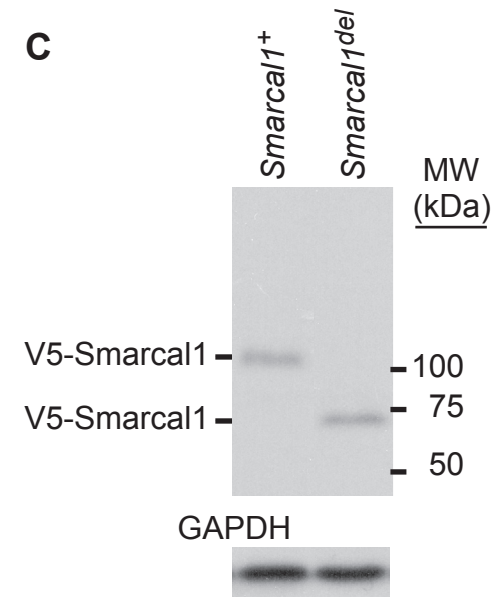

**D**

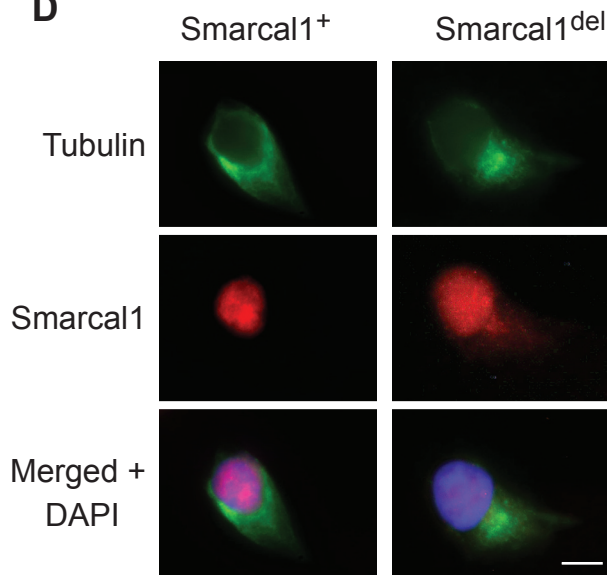

**E**

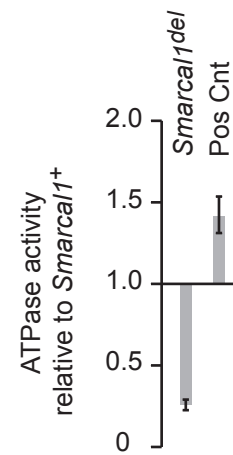

**A**

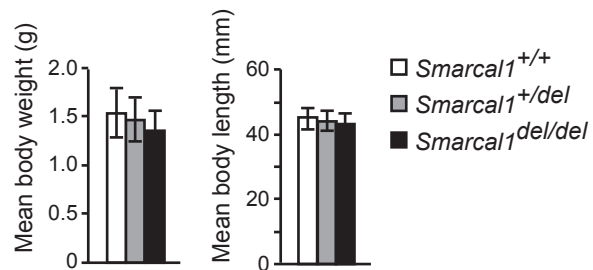

**B**

| <i>Smarcal1</i> <sup>+/del</sup> X <i>Smarcal1</i> <sup>+/del</sup> | P0       |          | Weaned   |          |
|---------------------------------------------------------------------|----------|----------|----------|----------|
|                                                                     | observed | expected | observed | expected |
| <i>Smarcal1</i> <sup>del/del</sup>                                  | 44       | 50       | 43       | 51       |
| <i>Smarcal1</i> <sup>+del</sup>                                     | 106      | 100      | 102      | 101      |
| <i>Smarcal1</i> <sup>+/+</sup>                                      | 50       | 50       | 58       | 51       |
| <b>Total</b>                                                        | 200      |          | 203      |          |

p=0.58      p=0.32

**C**

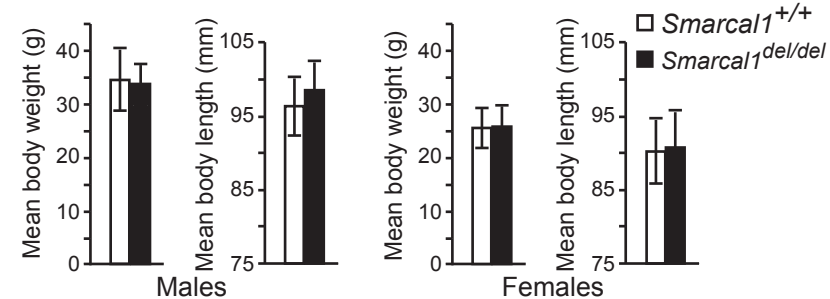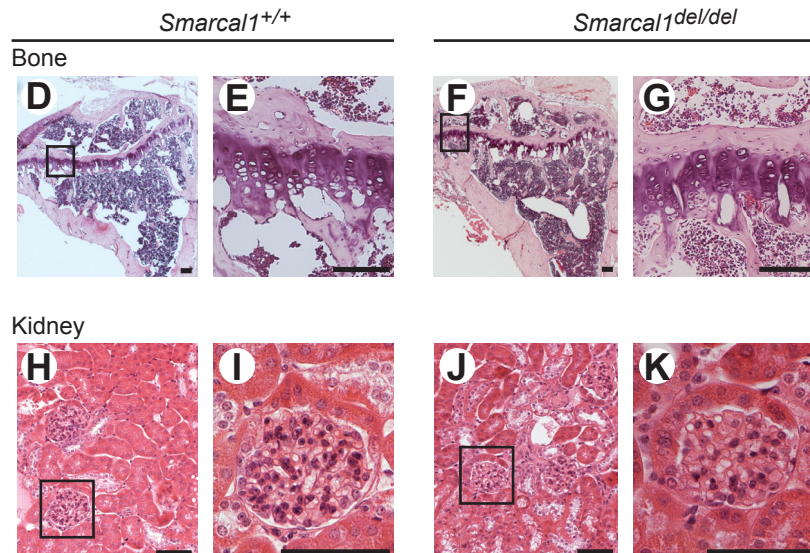

**L**

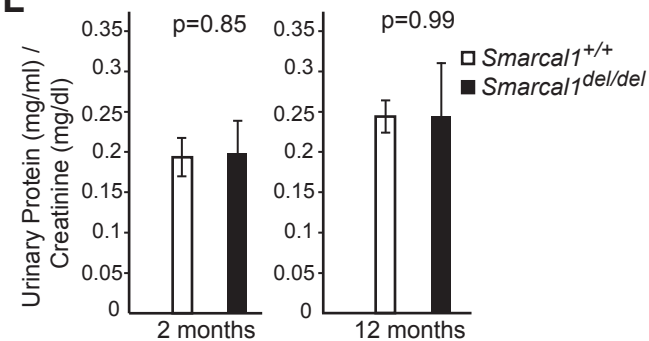

**M**

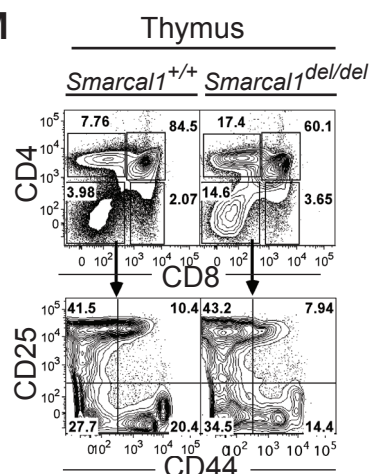

**N**

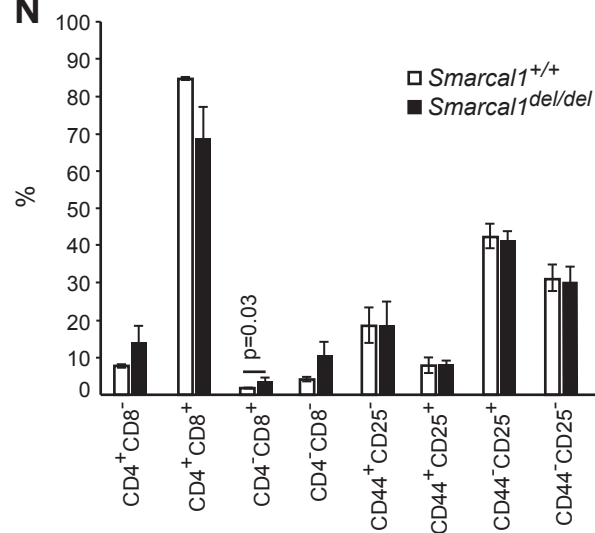

**O**

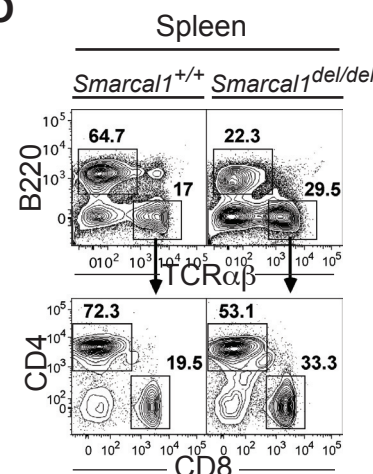

**p**

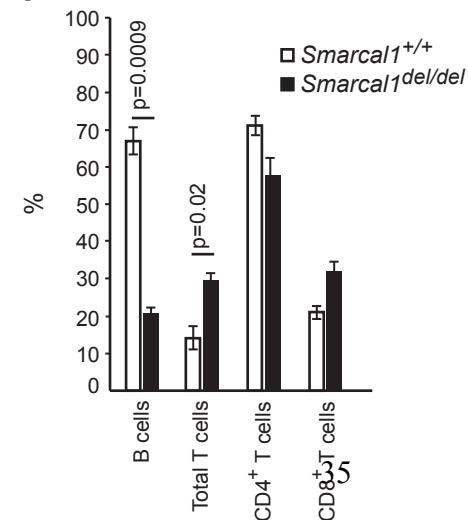

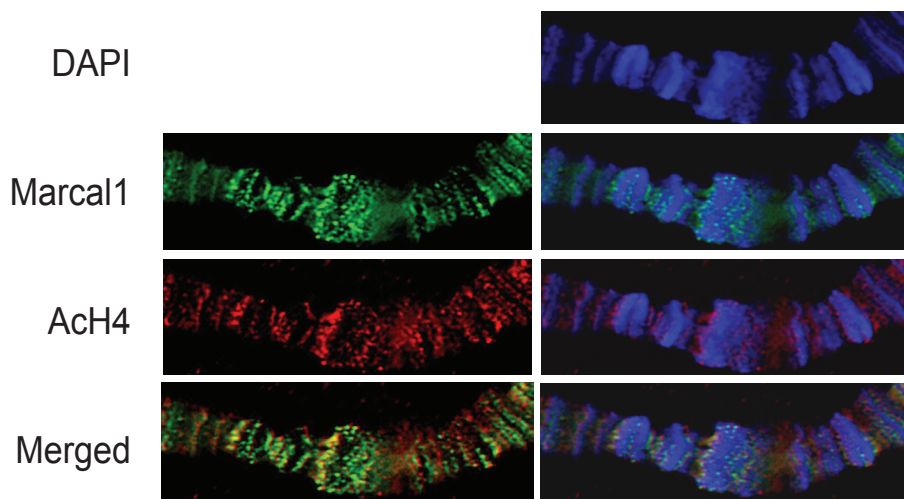

**A**

*Drosophila Marcal1* overexpression

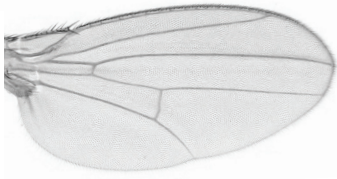

*UAS-Marcal1*

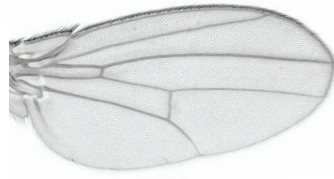

*tubulin-GAL4*

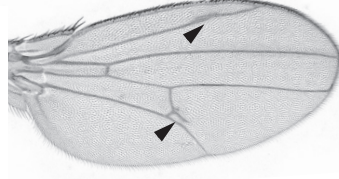

*UAS-Marcal1;*  
*tubulin-GAL4*

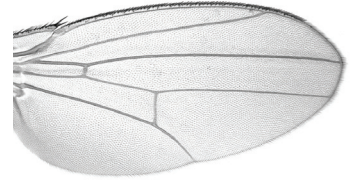

*UAS-Marcal1<sup>K275R</sup>;*  
*tubulin-GAL4*

**B**

*Human SMARCAL1* overexpression

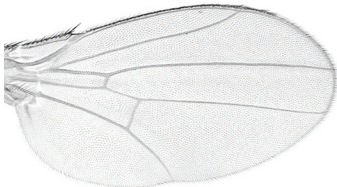

*UAS-SMARCAL1*

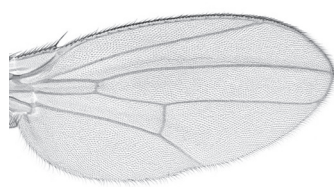

*MS1096-GAL4*

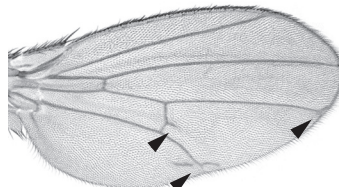

*MS1096-GAL4;*  
*UAS-SMARCAL1*

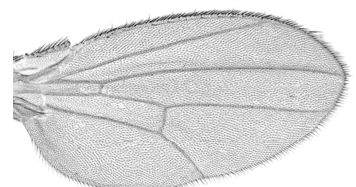

*MS1096-GAL4;*  
*UAS-SMARCAL1<sup>R580W</sup>*

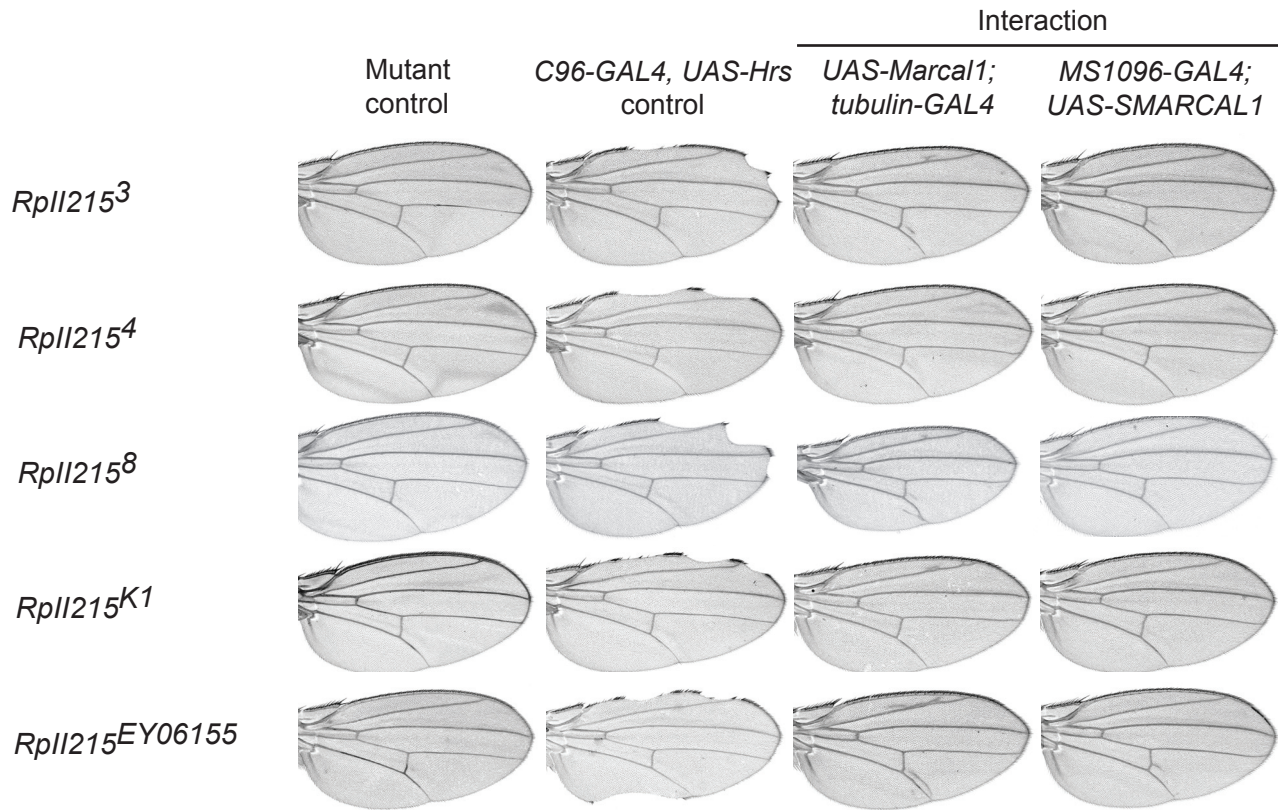

**A**

Gene expression in human fibroblasts

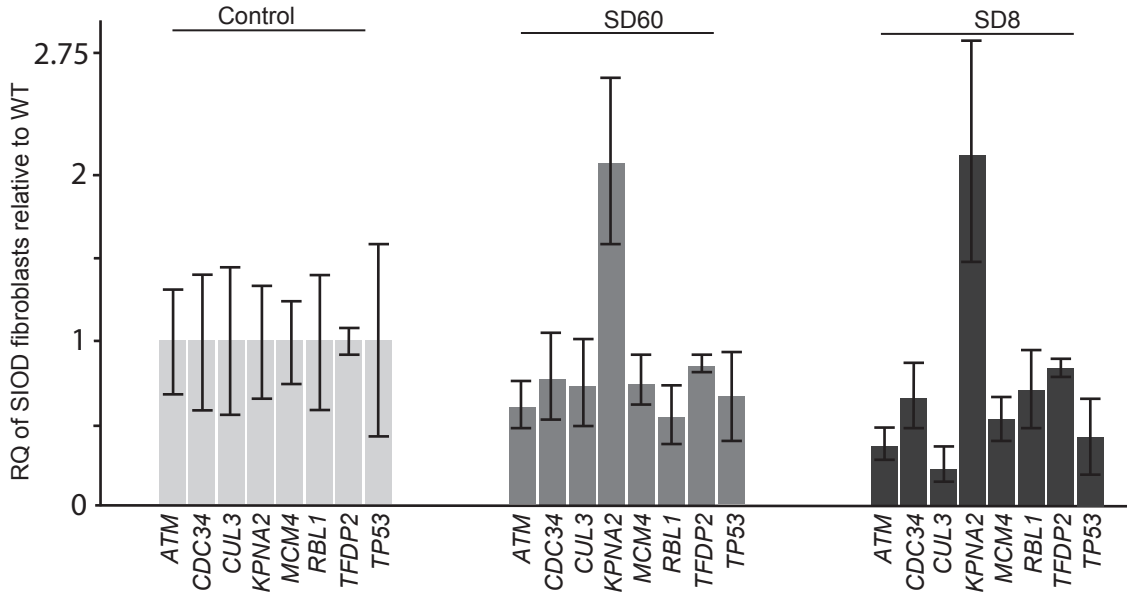

**B**

Gene expression in fly ovary

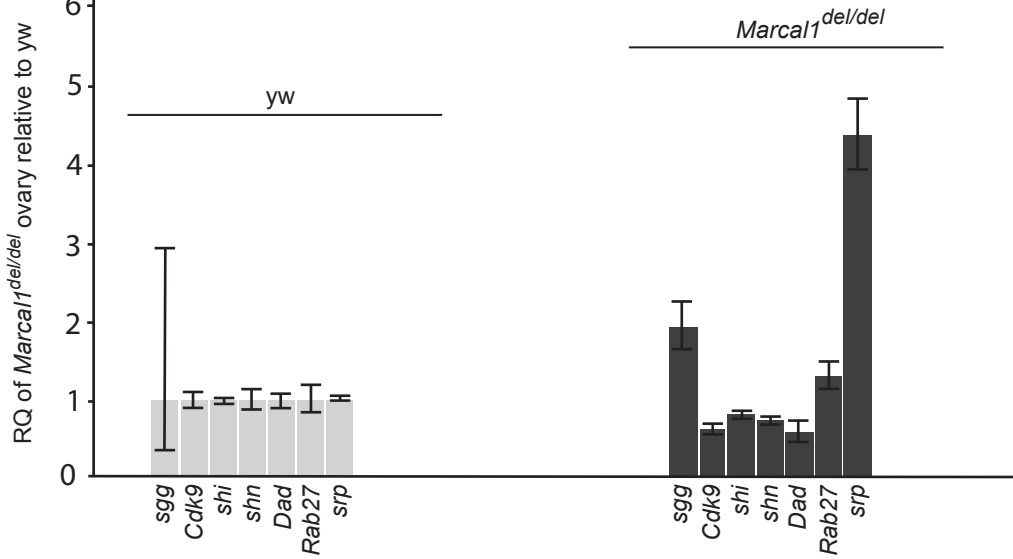

**C**

Gene expression in mouse liver after 1h heat stress

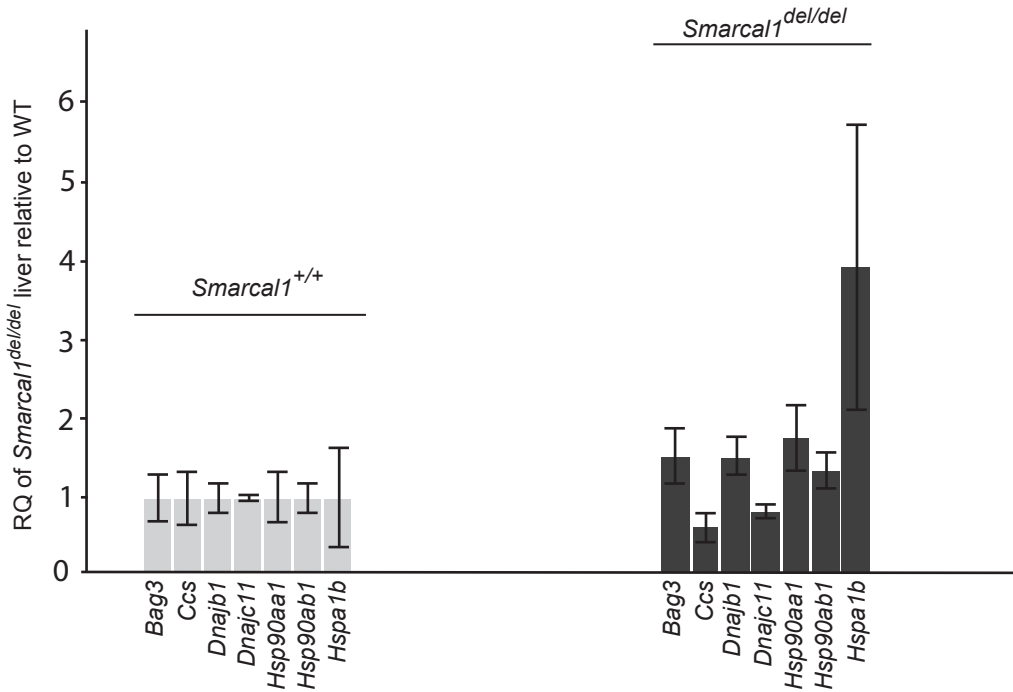

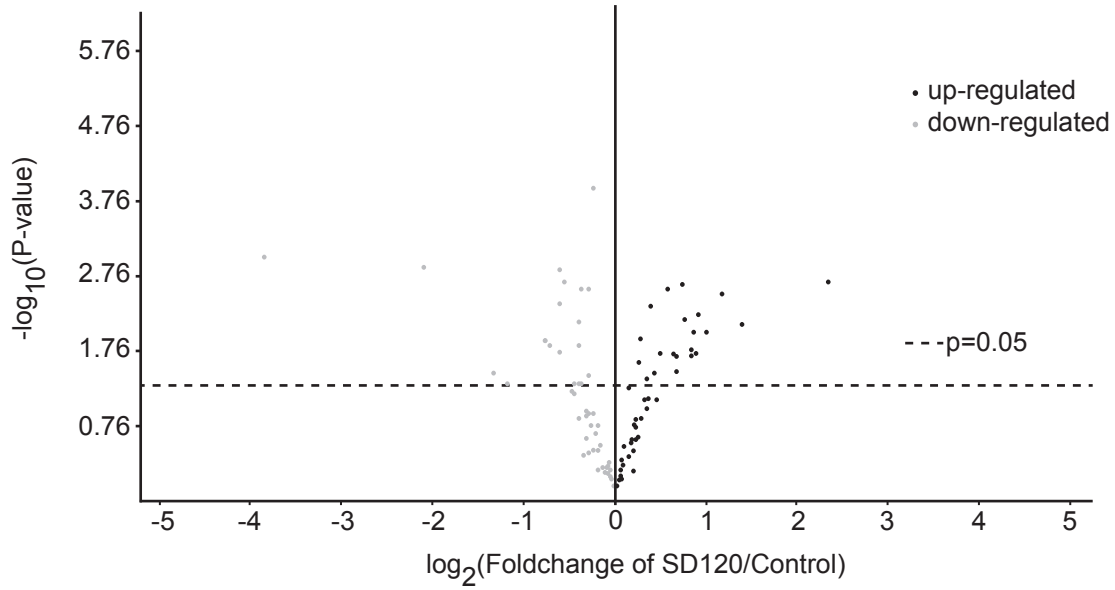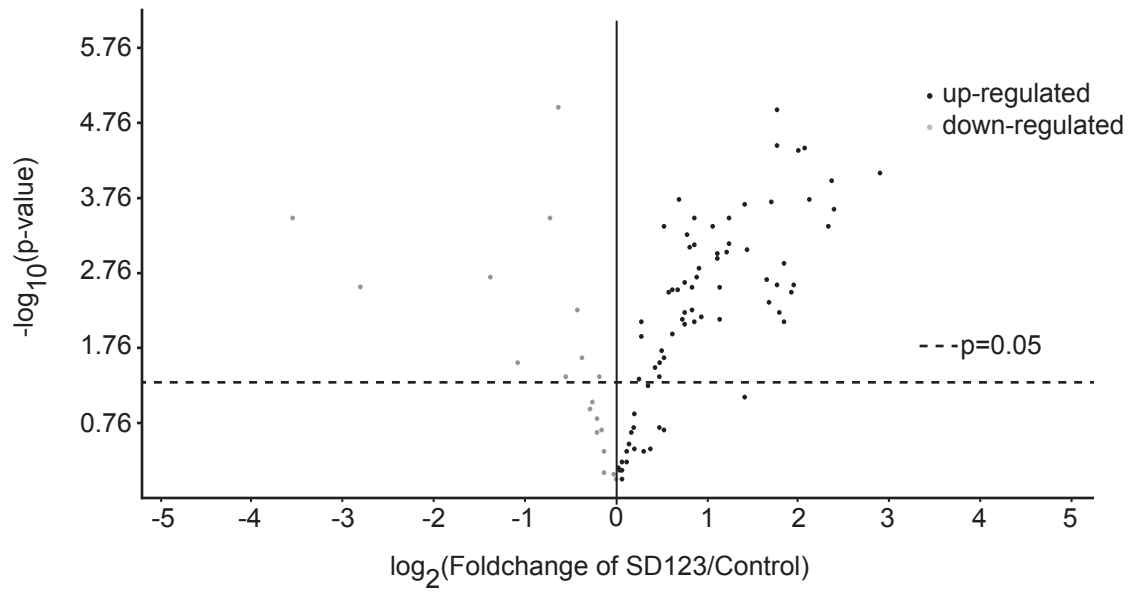



**A**

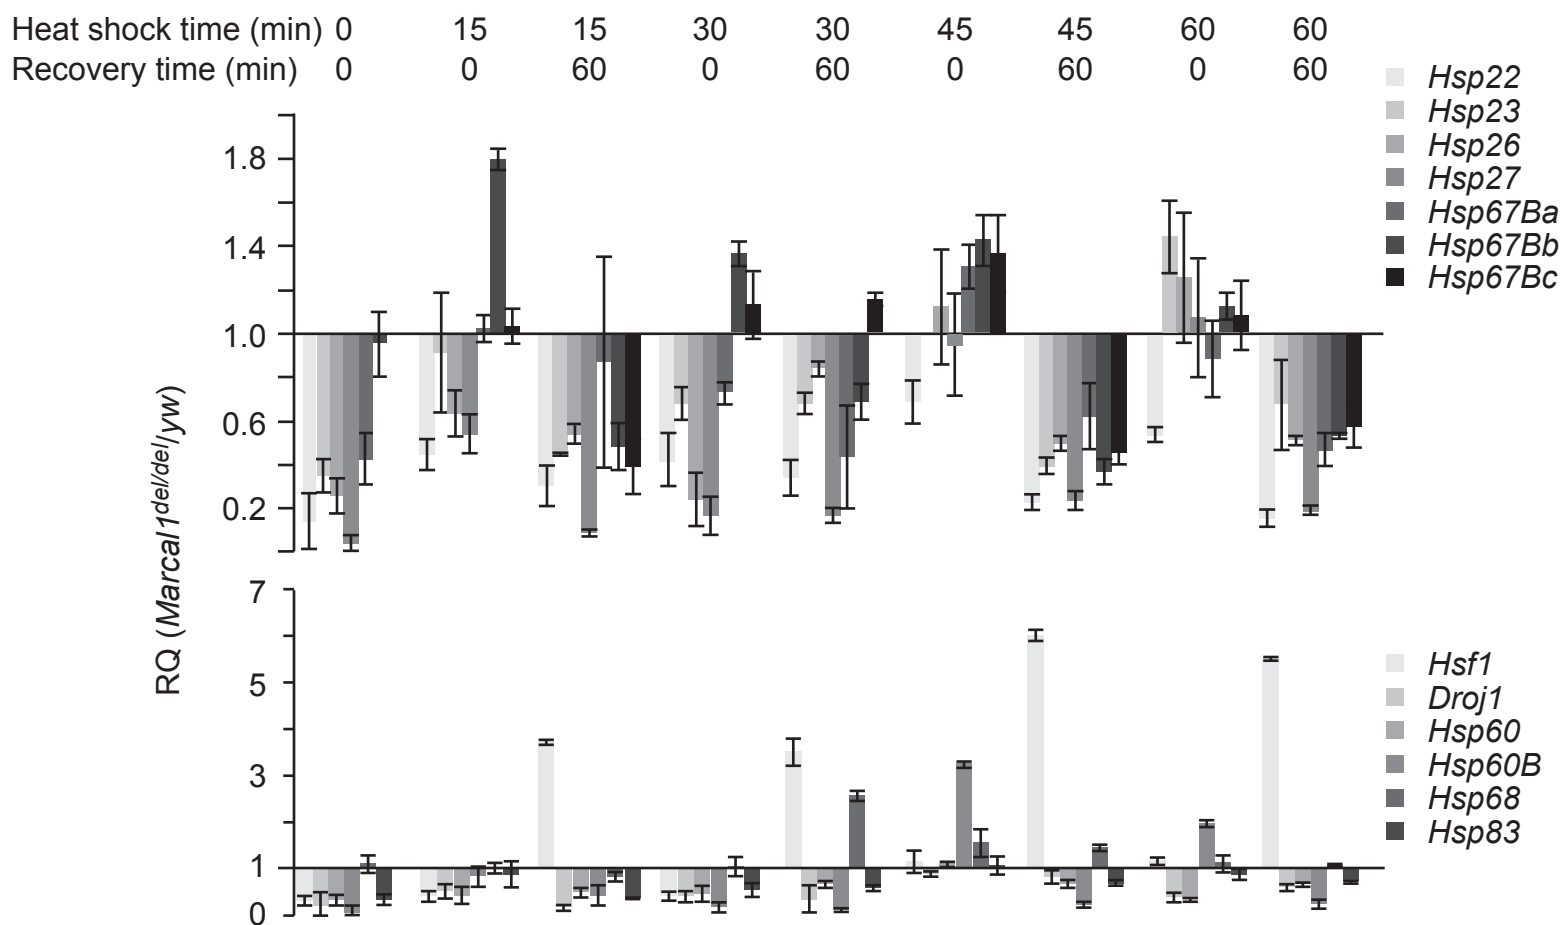

**B**

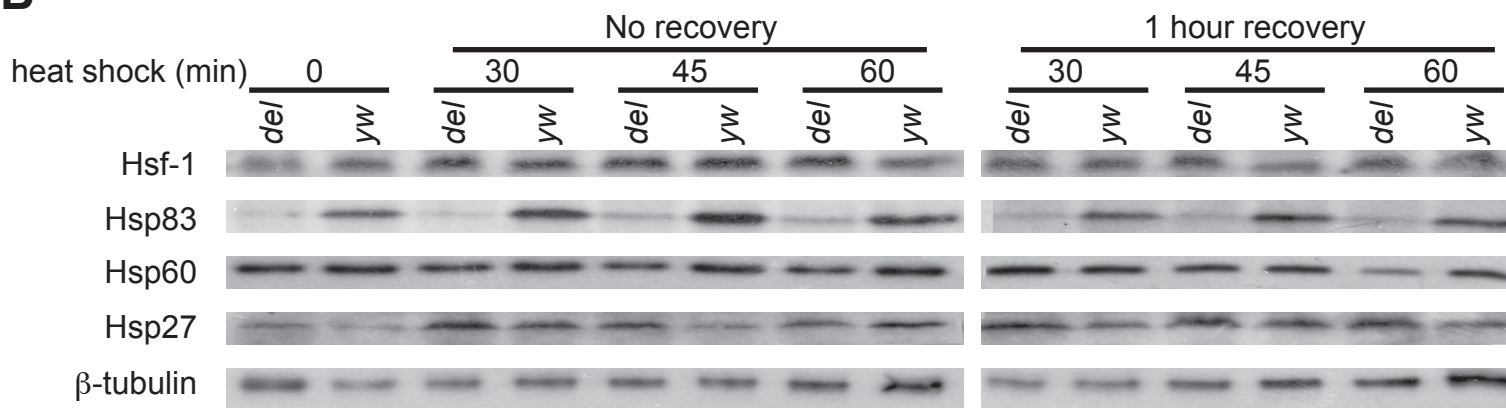

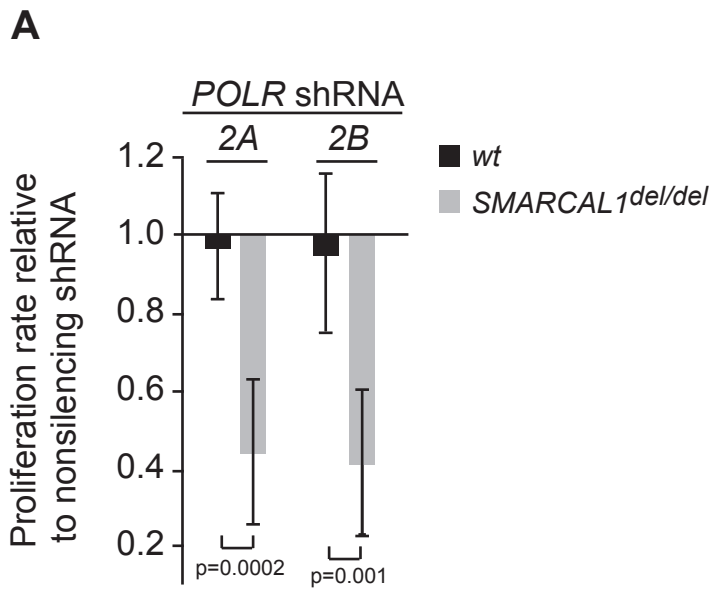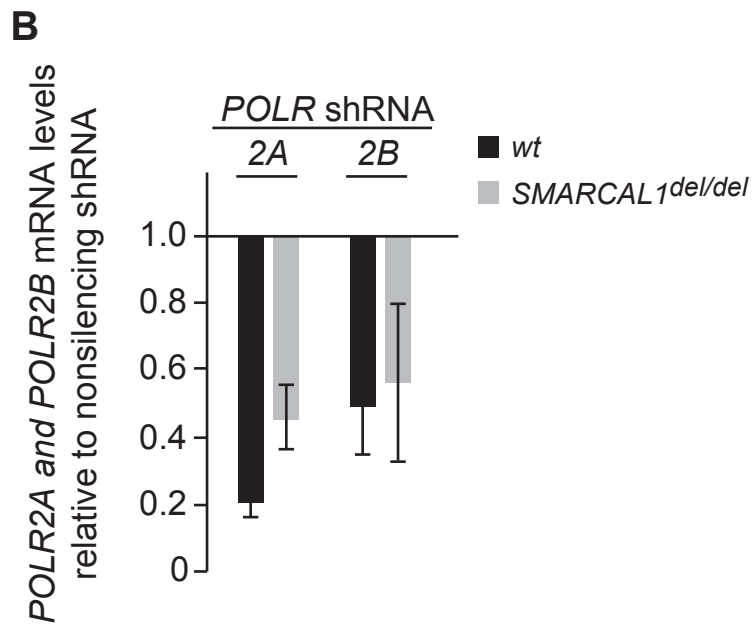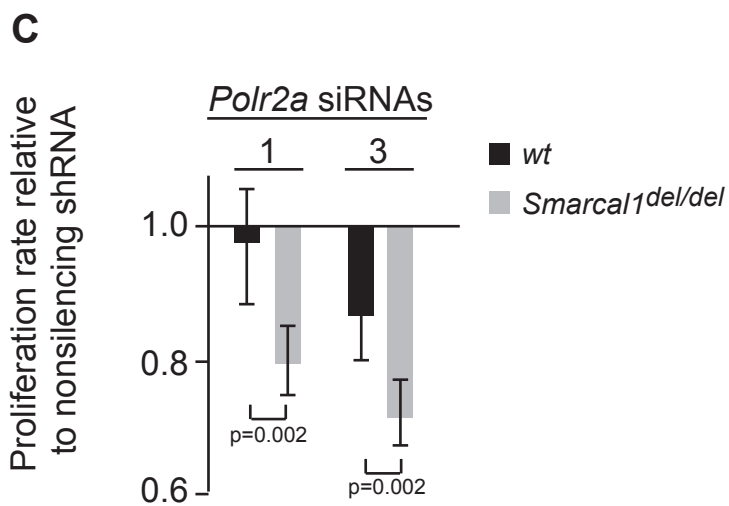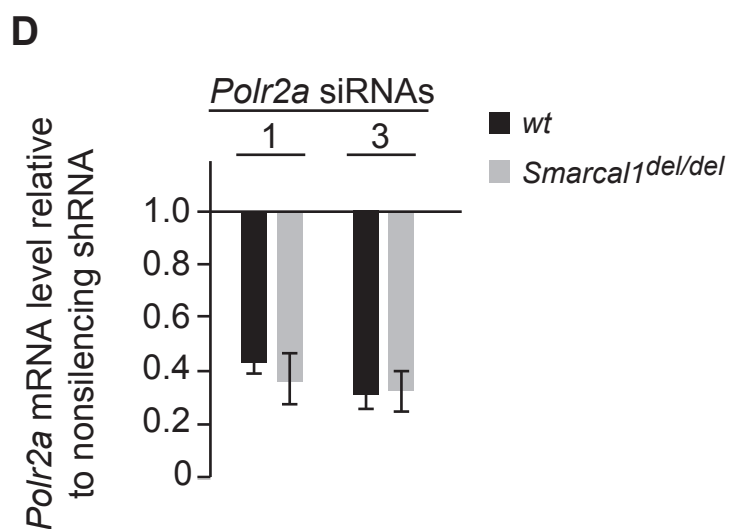

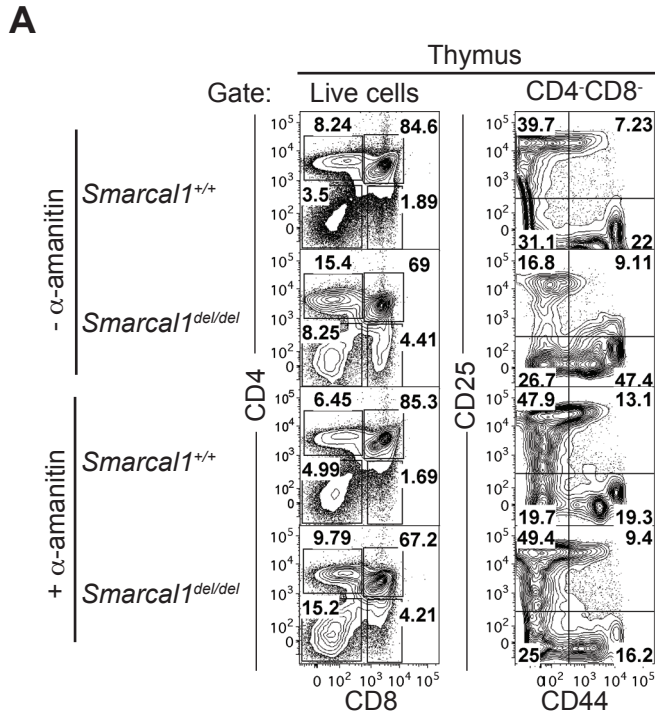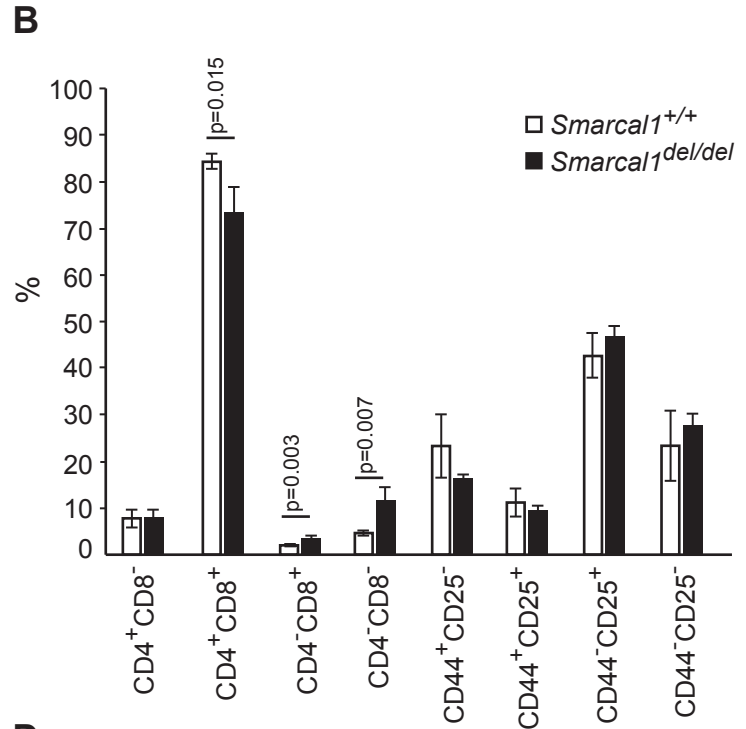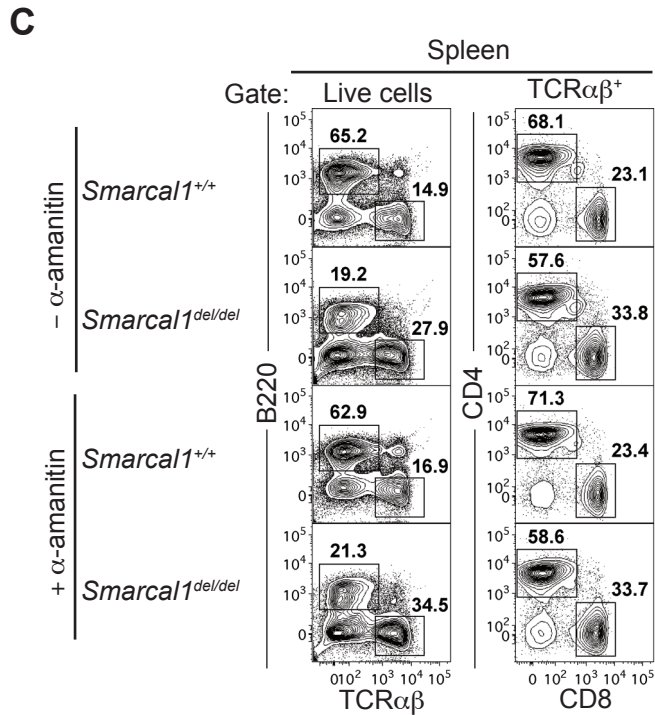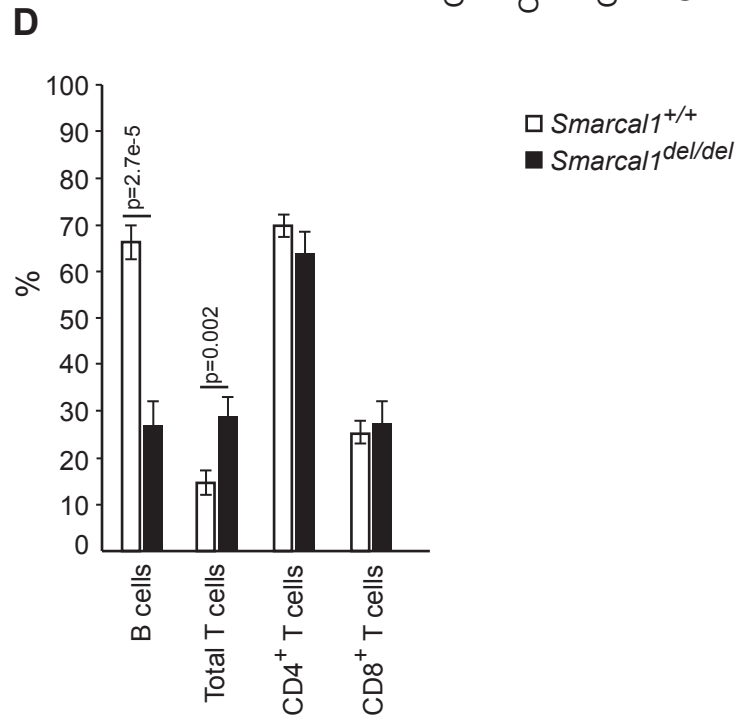

**Supplementary Table S1** Distribution of RplII for MarcalI and Pc target genes

| Data           |         | RplII absent |              |          | RplII stalled |              |          | RplII active |              |          | RplII undetermined |              |          |
|----------------|---------|--------------|--------------|----------|---------------|--------------|----------|--------------|--------------|----------|--------------------|--------------|----------|
| Source         | Profile | Observed (%) | Expected (%) | $\chi^2$ | Observed (%)  | Expected (%) | $\chi^2$ | Observed (%) | Expected (%) | $\chi^2$ | Observed (%)       | Expected (%) | $\chi^2$ |
| <i>Toll10b</i> | Marcal1 | 15           | 39           | 5E-69    | 21            | 11           | 6E-25    | 33           | 27           | 0.2      | 32                 | 23           | 7E-09    |
|                | Pc      | 45           | 39           | 1        | 27            | 11           | 2E-45    | 11           | 27           | 1E-24    | 17                 | 23           | 0.1      |
| S2             | Marcal1 | 28           | 55           | 2E-82    | 15            | 5            | 8E-41    | 42           | 29           | 3E-22    | -                  | -            | -        |
|                | Pc      | 64           | 55           | 7E-04    | 12            | 5            | 5E-11    | 13           | 29           | 7E-25    | -                  | -            | -        |

N.B. Expected is based on genome-wide distribution of RplII

P values from the  $\chi^2$  test were corrected for multiple testing, using Bonferroni correction

**Supplementary Table S2** Suppressors and enhancers of ectopic wing veins induced by the overexpression of *Drosophila* Marcal1 and human SMARCAL1.

| Gene                                                        | Allele         | <i>Drosophila</i><br>Marcal1 | Human<br>SMARCAL1 | Gene                | Allele            | <i>Drosophila</i><br>Marcal1 | Human<br>SMARCAL1 |
|-------------------------------------------------------------|----------------|------------------------------|-------------------|---------------------|-------------------|------------------------------|-------------------|
| <i>Nuclear Matrix and Chromatin Structure Interactors</i>   |                |                              |                   |                     |                   |                              |                   |
| <i>BEAF-32</i>                                              | <i>e00756</i>  | E                            | E                 | <i>Nipped-B</i>     | <i>02047</i>      | S                            | S                 |
|                                                             | <i>KG06904</i> | S                            | 0                 | <i>ord</i>          | <i>1</i>          | S                            | S                 |
| <i>Lam</i>                                                  | <i>91</i>      | E                            | E                 | <i>san</i>          | <i>KG04816</i>    | 0                            | 0                 |
|                                                             | <i>98</i>      | E                            | E                 | <i>SMC1</i>         | <i>c00402</i>     | E                            | E                 |
|                                                             | <i>sz18</i>    | E                            | E                 | <i>su(Hw)</i>       | <i>2</i>          | S                            | S                 |
| <i>LamC</i>                                                 | <i>G00158</i>  | S                            | S                 |                     | <i>8</i>          | S                            | S                 |
|                                                             | <i>k11904</i>  | 0                            | 0                 |                     | <i>e04061</i>     | E                            | E                 |
| <i>mei-S332</i>                                             | <i>1</i>       | S                            | 0                 | <i>Trl</i>          | <i>s2325</i>      | S                            | E                 |
| <i>mod(mdg4)</i>                                            | <i>u1</i>      | S                            | S                 |                     | <i>KG08276</i>    | S                            | S                 |
|                                                             | <i>KG08515</i> | S                            | S                 |                     |                   |                              |                   |
| <i>Chromatin Remodeling or Chromatin Structural Factors</i> |                |                              |                   |                     |                   |                              |                   |
| <i>Acf1</i>                                                 | <i>1</i>       | 0                            | 0                 | <i>Pcaf</i>         | <i>f02830</i>     | S                            | 0                 |
|                                                             | <i>2</i>       | E                            | E                 |                     | <i>f05456</i>     | 0                            | E                 |
|                                                             | <i>EY08629</i> | E                            | E                 |                     | <i>C137T</i>      | S                            | S                 |
| <i>mod</i>                                                  | <i>07570</i>   | S                            | S                 |                     | <i>E333st</i>     | 0                            | E                 |
| <i>Nap1</i>                                                 | <i>KG03959</i> | E                            | E                 |                     | <i>Q186st</i>     | S                            | 0                 |
|                                                             | <i>EY08596</i> | E                            | E                 |                     | <i>DeltaT280-</i> | S                            | S                 |
|                                                             | <i>K01</i>     | E                            | E                 | <i>Sir2</i>         | <i>17</i>         | 0                            | E                 |
|                                                             | <i>K02</i>     | 0                            | E                 |                     | <i>2A-7-11</i>    | E                            | E                 |
| <i>nej</i>                                                  | <i>P</i>       | S                            | S                 | <i>Su(var)205</i>   | <i>5</i>          | E                            | E                 |
|                                                             | <i>Q7</i>      | S                            | S                 | <i>Su(var)3-1</i>   | <i>3</i>          | S                            | S                 |
| <i>nhk-1</i>                                                | <i>Z3-0437</i> | E                            | 0                 | <i>Su(var)3-4</i>   | <i>1</i>          | S                            | E                 |
| <i>Nipped-A</i>                                             | <i>NC116</i>   | S                            | S                 |                     | <i>2</i>          | S                            | S                 |
|                                                             | <i>NC186</i>   | S                            | S                 | <i>trr</i>          | <i>1</i>          | S                            | S                 |
| <i>pr-set7</i>                                              | <i>1</i>       | 0                            | 0                 |                     | <i>3</i>          | S                            | S                 |
|                                                             | <i>EY04668</i> | E                            | E                 |                     | <i>4</i>          | S                            | S                 |
|                                                             |                |                              |                   |                     | <i>EY06632</i>    | E                            | E                 |
| <i>Mediator Complex</i>                                     |                |                              |                   |                     |                   |                              |                   |
| <i>Cdk8</i>                                                 | <i>A162</i>    | S                            | 0                 | <i>MED18</i>        | <i>e03853</i>     | S                            | S                 |
| <i>MED6</i>                                                 | <i>EY05087</i> | E                            | E                 | <i>MED20</i>        | <i>C6R20</i>      | 0                            | S                 |
| <i>MED12</i>                                                | <i>1</i>       | E                            | E                 |                     | <i>f00955</i>     | S                            | E                 |
| ( <i>Kto</i> )                                              |                |                              |                   |                     |                   |                              |                   |
| <i>MED13</i>                                                | <i>2</i>       | E                            | E                 | <i>MED23</i>        | <i>KG00948</i>    | E                            | 0                 |
| ( <i>skuld</i> )                                            |                |                              |                   |                     |                   |                              |                   |
|                                                             | <i>rK760</i>   | E                            | E                 | <i>MED24</i>        | <i>BG01670</i>    | E                            | E                 |
|                                                             | <i>L7062</i>   | 0                            | S                 | <i>MED28</i>        | <i>e03165</i>     | E                            | E                 |
|                                                             | <i>EY07369</i> | E                            | 0                 | <i>MED29</i>        | <i>1</i>          | 0                            | S                 |
|                                                             |                |                              |                   | ( <i>intersex</i> ) |                   |                              |                   |
| <i>MED15</i>                                                | <i>f04180</i>  | 0                            | E                 |                     | <i>KG04582</i>    | 0                            | 0                 |
| <i>MED17</i>                                                | <i>s2956</i>   | E                            | E                 |                     |                   |                              |                   |
| <i>RNA Polymerase II Complex</i>                            |                |                              |                   |                     |                   |                              |                   |
| <i>cul-4</i>                                                | <i>KG02900</i> | E                            | E                 | <i>RpII215</i>      | <i>3</i>          | 0                            | 0                 |
|                                                             | <i>EP2518</i>  | S                            | 0                 |                     | <i>4</i>          | S                            | S                 |
| <i>RpII33</i>                                               | <i>1</i>       | 0                            | 0                 |                     | <i>8</i>          | E                            | S                 |
|                                                             | <i>k05605</i>  | 0                            | S                 |                     | <i>12</i>         | E                            | E                 |
| <i>RpIII40</i>                                              | <i>wimp</i>    | E                            | E                 |                     | <i>102</i>        | E                            | E                 |
|                                                             | <i>S</i>       | S                            | S                 |                     | <i>G0040</i>      | 0                            | S                 |
|                                                             |                |                              |                   |                     | <i>K1</i>         | S                            | S                 |
|                                                             |                |                              |                   |                     | <i>ts</i>         | S                            | E                 |
|                                                             |                |                              |                   |                     | <i>Ubl</i>        | E                            | S                 |

|                                                            |                  |          |          | <i>EY06155</i>                  | <i>E</i>        | <i>E</i>            |          |
|------------------------------------------------------------|------------------|----------|----------|---------------------------------|-----------------|---------------------|----------|
| <i>RNA Polymerase II Initiation Factors</i>                |                  |          |          |                                 |                 |                     |          |
| <i>pb (srb)</i>                                            | <i>1</i>         | <i>S</i> | <i>E</i> | <i>Taf2 (TFIID)</i>             | <i>c03353</i>   | <i>S</i>            | <i>0</i> |
|                                                            | <i>10</i>        | <i>S</i> | <i>S</i> | <i>Taf4 (TFIID)</i>             | <i>1</i>        | <i>E</i>            | <i>S</i> |
|                                                            | <i>23</i>        | <i>S</i> | <i>S</i> |                                 | <i>e02502</i>   | <i>S</i>            | <i>E</i> |
|                                                            | <i>27</i>        | <i>S</i> | <i>0</i> | <i>Taf5 (TFIID)</i>             | <i>EY01764b</i> | <i>E</i>            | <i>0</i> |
| <i>Trf2</i>                                                | <i>PL28#1</i>    | <i>S</i> | <i>S</i> | <i>Taf6 (TFIID)</i>             | <i>1</i>        | <i>0</i>            | <i>E</i> |
| <i>TfIIA-L</i>                                             | <i>e01040</i>    | <i>0</i> | <i>E</i> |                                 | <i>f06930</i>   | <i>0</i>            | <i>E</i> |
|                                                            | <i>d08487</i>    | <i>S</i> | <i>E</i> | <i>Taf10</i>                    | <i>KG07031</i>  | <i>0</i>            | <i>0</i> |
|                                                            |                  |          |          | ( <i>TFIID</i> )                |                 |                     |          |
| <i>TfIIA-S</i>                                             | <i>E32</i>       | <i>S</i> | <i>E</i> | <i>Taf10b</i>                   | <i>KG01574</i>  | <i>E</i>            | <i>E</i> |
|                                                            |                  |          |          | ( <i>TFIID</i> )                |                 |                     |          |
|                                                            | <i>E73</i>       | <i>S</i> | <i>0</i> | <i>Taf12L</i>                   | <i>KG00946</i>  | <i>E</i>            | <i>S</i> |
|                                                            |                  |          |          | ( <i>TFIID</i> )                |                 |                     |          |
|                                                            | <i>EY02323</i>   | <i>E</i> | <i>S</i> | <i>TfIIE<math>\alpha</math></i> | <i>e01382</i>   | <i>S</i>            | <i>0</i> |
| <i>TfIIB</i>                                               | <i>DG14311</i>   | <i>S</i> | <i>E</i> | <i>TfIIE<math>\beta</math></i>  | <i>e00364</i>   | <i>S</i>            | <i>E</i> |
| <i>caz (TFIID)</i>                                         | <i>EP1564</i>    | <i>E</i> | <i>E</i> | <i>TfIIF<math>\alpha</math></i> | <i>d01485</i>   | <i>S</i>            | <i>E</i> |
| <i>e(y)1</i>                                               | <i>BG00948</i>   | <i>S</i> | <i>S</i> | <i>TfIIF<math>\beta</math></i>  | <i>j3C1</i>     | <i>E</i>            | <i>S</i> |
| ( <i>TFIID</i> )                                           |                  |          |          |                                 |                 |                     |          |
| <i>mia</i>                                                 | <i>B560</i>      | <i>S</i> | <i>S</i> | <i>Cdk7</i>                     | <i>T170A</i>    | <i>E, blistered</i> | <i>E</i> |
| ( <i>TFIID</i> )                                           |                  |          |          | ( <i>TFIIH</i> )                |                 |                     |          |
|                                                            | <i>EY07883</i>   | <i>E</i> | <i>E</i> |                                 | <i>D136R</i>    | <i>E</i>            | <i>E</i> |
| <i>Taf1</i>                                                | <i>1</i>         | <i>S</i> | <i>S</i> | <i>CycH</i>                     | <i>KG02273</i>  | <i>E</i>            | <i>E</i> |
| ( <i>TFIID</i> )                                           |                  |          |          | ( <i>TFIIH</i> )                |                 |                     |          |
|                                                            | <i>EP421</i>     | <i>E</i> | <i>E</i> | <i>hay (TFIIH,</i>              | <i>f00028</i>   | <i>0</i>            | <i>E</i> |
|                                                            |                  |          |          | <i>Xpb, Ercc3)</i>              |                 |                     |          |
| <i>RNA Polymerase II Elongation Factors</i>                |                  |          |          |                                 |                 |                     |          |
| <i>Cdk9</i>                                                | <i>f05537</i>    | <i>E</i> | <i>E</i> | <i>mus209</i>                   | <i>02448</i>    | <i>S</i>            | <i>S</i> |
|                                                            |                  |          |          | ( <i>PCNA</i> )                 |                 |                     |          |
| <i>CycT</i>                                                | <i>c04764</i>    | <i>S</i> | <i>S</i> |                                 | <i>k00704</i>   | <i>0</i>            | <i>S</i> |
|                                                            | <i>c06571</i>    | <i>E</i> | <i>E</i> |                                 | <i>EY09082</i>  | <i>E</i>            | <i>E</i> |
| <i>dre4</i>                                                | <i>EY01604</i>   | <i>E</i> | <i>S</i> | <i>Spt4</i>                     | <i>k05316</i>   | <i>S</i>            | <i>S</i> |
| ( <i>FACT,</i>                                             |                  |          |          |                                 |                 |                     |          |
| <i>Spt16)</i>                                              |                  |          |          |                                 |                 |                     |          |
| <i>Elongin-B</i>                                           | <i>EP3132</i>    | <i>S</i> | <i>0</i> | <i>Spt5</i>                     | <i>SIE-27</i>   | <i>S</i>            | <i>S</i> |
|                                                            | <i>EY04022</i>   | <i>E</i> | <i>E</i> |                                 | <i>W049</i>     | <i>S, small</i>     | <i>0</i> |
| <i>Elongin-C</i>                                           | <i>e01107</i>    | <i>S</i> | <i>0</i> | <i>Spt6</i>                     | <i>G0063</i>    | <i>S</i>            | <i>S</i> |
| <i>Mi-2</i>                                                | <i>DG12505</i>   | <i>S</i> | <i>0</i> | <i>Su(Tpl)</i>                  | <i>10</i>       | <i>S</i>            | <i>S</i> |
|                                                            |                  |          |          | ( <i>ELL</i> )                  |                 |                     |          |
|                                                            | <i>EY08138</i>   | <i>E</i> | <i>E</i> |                                 | <i>c00783</i>   | <i>0</i>            | <i>0</i> |
|                                                            | <i>EY08696</i>   | <i>E</i> | <i>E</i> |                                 | <i>c03115</i>   | <i>S</i>            | <i>0</i> |
|                                                            |                  |          |          |                                 | <i>S-192</i>    | <i>S</i>            | <i>E</i> |
|                                                            |                  |          |          | <i>TfIIS</i>                    | <i>2</i>        | <i>S</i>            | <i>0</i> |
| <i>RNA Polymerase II Transcription Termination Factors</i> |                  |          |          |                                 |                 |                     |          |
| <i>Ids</i>                                                 | <i>1</i>         | <i>S</i> | <i>E</i> | <i>Pcf11</i>                    | <i>k08015</i>   | <i>S</i>            | <i>E</i> |
|                                                            | <i>A190</i>      | <i>0</i> | <i>E</i> | <i>Slbp</i>                     | <i>EP1045</i>   | <i>S</i>            | <i>0</i> |
|                                                            | <i>e00889</i>    | <i>S</i> | <i>E</i> |                                 |                 |                     |          |
|                                                            | <i>Hor-1</i>     | <i>E</i> | <i>E</i> |                                 |                 |                     |          |
| <i>Regulators of DNA Replication Gene Transcription</i>    |                  |          |          |                                 |                 |                     |          |
| <i>cdc2</i>                                                | <i>B47</i>       | <i>S</i> | <i>E</i> | <i>Dp</i>                       | <i>49Fk-1</i>   | <i>0</i>            | <i>S</i> |
|                                                            | <i>c03495</i>    | <i>E</i> | <i>S</i> |                                 | <i>a1</i>       | <i>S</i>            | <i>S</i> |
|                                                            | <i>E1-23</i>     | <i>E</i> | <i>E</i> |                                 | <i>KG00660</i>  | <i>S</i>            | <i>S</i> |
|                                                            | <i>E1-24</i>     | <i>E</i> | <i>E</i> |                                 | <i>EY09085</i>  | <i>E</i>            | <i>E</i> |
|                                                            | <i>GT-000294</i> | <i>E</i> | <i>E</i> | <i>E2f</i>                      | <i>07172</i>    | <i>S</i>            | <i>S</i> |
| <i>CycA</i>                                                | <i>03946</i>     | <i>E</i> | <i>0</i> |                                 | <i>i2</i>       | <i>0</i>            | <i>S</i> |
|                                                            | <i>c05304</i>    | <i>E</i> | <i>S</i> |                                 | <i>KG03332</i>  | <i>S</i>            | <i>S</i> |
|                                                            | <i>C8LR1</i>     | <i>S</i> | <i>E</i> |                                 | <i>EY14408</i>  | <i>E</i>            | <i>0</i> |

|                                                             |                |   |   |                |               |   |   |
|-------------------------------------------------------------|----------------|---|---|----------------|---------------|---|---|
|                                                             | <i>H170</i>    | S | S | <i>grh</i>     | <i>06850</i>  | E | E |
|                                                             | <i>EY11746</i> | E | S |                | <i>IM</i>     | E | E |
| <i>Dref</i>                                                 | <i>KG09294</i> | 0 | S |                | <i>s2140</i>  | E | S |
|                                                             | <i>NP4719</i>  | 0 | 0 |                |               |   |   |
| <i>Regulators of Chromatin Condensation and Segregation</i> |                |   |   |                |               |   |   |
| <i>barr</i>                                                 | <i>k14014</i>  | S | S | <i>mei-9</i>   | <i>f01366</i> | S | S |
|                                                             | <i>L305</i>    | S | S | <i>mei-P22</i> | <i>A054</i>   | E | E |
| <i>Cap-G</i><br>( <i>condensin</i> )                        | <i>BG01873</i> | E | E |                | <i>P22</i>    | E | E |
|                                                             | <i>EP2346</i>  | E | E | <i>mei-W68</i> | <i>1</i>      | S | S |
| <i>gluon</i>                                                | <i>88-37</i>   | S | 0 |                | <i>k05603</i> | S | S |
|                                                             | <i>k08819</i>  | S | S | <i>pros</i>    | <i>17</i>     | S | S |

Key: S = suppressor, 0 = Neither a suppressor nor an enhancer, E = enhancer.

**Supplementary Table S3** Log<sub>2</sub> scale value of mRNAs expression in SIOD (SD8 and SD60) and control fibroblasts.

| <b>AffyID</b> | <b>Symbol</b>  | <b>Control</b> | <b>SD8</b> | <b>SD60</b> |
|---------------|----------------|----------------|------------|-------------|
| 204776_at     | <i>THBS4</i>   | 14.73          | 3.05       | 2.77        |
| 213183_s_at   | <i>CDKN1C</i>  | 7.89           | 2.35       | 2.3         |
| 226931_at     | <i>TMTC1</i>   | 8.17           | 2.64       | 2.34        |
| 205549_at     | <i>PCP4</i>    | 9.52           | 3.06       | 2.86        |
| 205226_at     | <i>PDGFRL</i>  | 7.535          | 2.325      | 2.395       |
| 204712_at     | <i>WIF1</i>    | 9.47           | 3.14       | 3.2         |
| 227949_at     | <i>PHACTR3</i> | 9.13           | 3.34       | 3.32        |
| 228750_at     | <i>COL14A1</i> | 7.96           | 3.02       | 2.98        |
| 221805_at     | <i>NEFL</i>    | 6.99           | 2.55       | 2.75        |
| 205935_at     | <i>FOXF1</i>   | 6.31           | 2.41       | 2.42        |
| 242137_at     | <i>NA</i>      | 7.075          | 2.705      | 2.775       |
| 208096_s_at   | <i>COL21A1</i> | 7.235          | 2.685      | 2.985       |
| 220783_at     | <i>MMP27</i>   | 5.75           | 2.35       | 2.22        |
| 219304_s_at   | <i>PDGFD</i>   | 9.72           | 3.79       | 3.97        |
| 237860_at     | <i>RBMS3</i>   | 6.61           | 2.68       | 2.66        |
| 206404_at     | <i>FGF9</i>    | 5.255          | 2.185      | 2.175       |
| 239468_at     | <i>MKX</i>     | 11.435         | 5.125      | 4.415       |
| 219454_at     | <i>EGFL6</i>   | 5.88           | 2.45       | 2.47        |
| 221916_at     | <i>NEFL</i>    | 7.97           | 3.51       | 3.47        |
| 1555106_a_at  | <i>CTDSPL2</i> | 5.86           | 2.6        | 2.56        |
| 229525_at     | <i>THOC7</i>   | 6.87           | 2.91       | 3.15        |
| 232746_at     | <i>CXCR7</i>   | 6.45           | 2.97       | 2.72        |
| 1557155_a_at  | <i>ZIC1</i>    | 7.275          | 3.045      | 3.495       |
| 230418_s_at   | <i>GALNTL1</i> | 8.125          | 3.765      | 3.595       |
| 227816_at     | <i>NTN1</i>    | 5.515          | 2.515      | 2.485       |
| 218995_s_at   | <i>EDN1</i>    | 9.435          | 4.145      | 4.445       |
| 226322_at     | <i>TMTC1</i>   | 9.04           | 4.45       | 3.95        |



|              |                 |        |       |       |
|--------------|-----------------|--------|-------|-------|
| 225089_at    | <i>USP40</i>    | 4.425  | 1.965 | 2.155 |
| 239503_at    | <i>NA</i>       | 5.355  | 2.565 | 2.515 |
| 220306_at    | <i>FAM46C</i>   | 5.46   | 2.62  | 2.59  |
| 235044_at    | <i>CYYR1</i>    | 5.965  | 2.685 | 3.035 |
| 227857_at    | <i>C20orf3</i>  | 7.5    | 3.48  | 3.72  |
| 239680_at    | <i>NA</i>       | 6.265  | 3.125 | 3.005 |
| 229912_at    | <i>SDK1</i>     | 5.07   | 2.51  | 2.51  |
| 210997_at    | <i>HGF</i>      | 5.345  | 2.655 | 2.685 |
| 220386_s_at  | <i>EML4</i>     | 7.39   | 3.57  | 3.88  |
| 1564630_at   | <i>EDN1</i>     | 4.595  | 2.315 | 2.315 |
| 215450_at    | <i>SNRPE</i>    | 8.38   | 4.37  | 4.19  |
| 203372_s_at  | <i>SOCS2</i>    | 5.255  | 2.685 | 2.695 |
| 219616_at    | <i>FLJ21963</i> | 4.59   | 2.37  | 2.33  |
| 212777_at    | <i>SOS1</i>     | 4.455  | 2.355 | 2.225 |
| 1568408_x_at | <i>NA</i>       | 4.58   | 2.36  | 2.37  |
| 221915_s_at  | <i>RANBP1</i>   | 4.805  | 2.485 | 2.525 |
| 215813_s_at  | <i>PTGS1</i>    | 11.095 | 5.875 | 5.765 |
| 228501_at    | <i>GALNTL2</i>  | 6.33   | 3.46  | 3.2   |
| 210305_at    | <i>PDE4DIP</i>  | 7.73   | 4.14  | 3.99  |
| 202283_at    | <i>SERPINF1</i> | 9.63   | 5.12  | 5.02  |
| 209646_x_at  | <i>ALDH1B1</i>  | 9.325  | 5.015 | 4.825 |
| 228485_s_at  | <i>SLC44A1</i>  | 8.68   | 4.61  | 4.6   |
| 237986_at    | <i>MGC16121</i> | 5.03   | 2.71  | 2.66  |
| 228707_at    | <i>CLDN23</i>   | 8.345  | 4.675 | 4.265 |
| 211368_s_at  | <i>CASP1</i>    | 5.295  | 2.745 | 2.925 |
| 213285_at    | <i>TMEM30B</i>  | 4.915  | 2.675 | 2.625 |
| 207386_at    | <i>CYP7B1</i>   | 5.775  | 3.265 | 2.965 |
| 225977_at    | <i>PCDH18</i>   | 6.05   | 3.34  | 3.2   |
| 233191_at    | <i>RUFY2</i>    | 5.64   | 2.92  | 3.19  |
| 209057_x_at  | <i>CDC5L</i>    | 7.5    | 4.27  | 3.89  |
| 226865_at    | <i>NA</i>       | 6.225  | 3.415 | 3.365 |

|              |                  |        |       |       |
|--------------|------------------|--------|-------|-------|
| 227610_at    | <i>TSPAN11</i>   | 6.12   | 3.46  | 3.22  |
| 1555594_a_at | <i>MBNL1</i>     | 4.82   | 2.7   | 2.67  |
| 210454_s_at  | <i>KCNJ6</i>     | 5      | 2.9   | 2.7   |
| 230164_at    | <i>ZNF621</i>    | 4.57   | 2.5   | 2.68  |
| 207869_s_at  | <i>CACNA1G</i>   | 5.61   | 3.27  | 3.11  |
| 210380_s_at  | <i>CACNA1G</i>   | 6.22   | 3.55  | 3.53  |
| 215802_at    | <i>TLE1</i>      | 5.325  | 3.035 | 3.015 |
| 241779_at    | <i>MTX3</i>      | 7.17   | 4.26  | 3.91  |
| 230967_s_at  | <i>USP7</i>      | 9.325  | 5.435 | 5.215 |
| 229505_at    | <i>NAP1L4</i>    | 6.81   | 3.91  | 3.88  |
| 242809_at    | <i>IL1RL1</i>    | 4.445  | 2.565 | 2.525 |
| 1554283_at   | <i>CCRN4L</i>    | 5.775  | 3.295 | 3.335 |
| 1560047_s_at | <i>LOC439962</i> | 5.725  | 3.345 | 3.275 |
| 204610_s_at  | <i>CCDC85B</i>   | 6.505  | 3.715 | 3.825 |
| 228772_at    | <i>HNMT</i>      | 6.94   | 4.16  | 3.88  |
| 214505_s_at  | <i>FHL1</i>      | 6.28   | 3.69  | 3.62  |
| 227860_at    | <i>CPXMI</i>     | 3.805  | 2.225 | 2.215 |
| 209829_at    | <i>C6orf32</i>   | 10.8   | 6.12  | 6.47  |
| 213972_at    | <i>FOXD1</i>     | 5.245  | 2.985 | 3.145 |
| 211064_at    | <i>ZNF493</i>    | 5.33   | 3.22  | 3.04  |
| 204684_at    | <i>NPTX1</i>     | 10.495 | 6.025 | 6.295 |
| 232926_x_at  | <i>ANKRD19</i>   | 4.6    | 2.73  | 2.67  |
| 223556_at    | <i>HELLS</i>     | 6.065  | 3.655 | 3.485 |
| 229204_at    | <i>HP1BP3</i>    | 9.785  | 5.555 | 6.005 |
| 220786_s_at  | <i>SLC38A4</i>   | 4.535  | 2.695 | 2.685 |
| 211348_s_at  | <i>CDC14B</i>    | 6.715  | 4.135 | 3.855 |
| 239959_x_at  | <i>PDE3B</i>     | 4.235  | 2.505 | 2.565 |
| 213642_at    | <i>NA</i>        | 13.65  | 7.98  | 8.4   |
| 204841_s_at  | <i>EEA1</i>      | 7.135  | 4.395 | 4.195 |
| 205732_s_at  | <i>NCOA2</i>     | 5.52   | 3.4   | 3.24  |
| 1556066_at   | <i>JMJD3</i>     | 3.465  | 2.085 | 2.085 |

|              |                  |       |       |       |
|--------------|------------------|-------|-------|-------|
| 213406_at    | <i>WSBI</i>      | 3.94  | 2.35  | 2.41  |
| 232112_at    | <i>RALGPS2</i>   | 4.555 | 2.835 | 2.685 |
| 208889_s_at  | <i>NCOR2</i>     | 3.8   | 2.3   | 2.31  |
| 205128_x_at  | <i>PTGS1</i>     | 13.13 | 8.15  | 7.83  |
| 210298_x_at  | <i>FHL1</i>      | 4.005 | 2.445 | 2.435 |
| 213590_at    | <i>SLC16A5</i>   | 8.195 | 4.855 | 5.125 |
| 210299_s_at  | <i>FHL1</i>      | 8.635 | 5.405 | 5.115 |
| 214125_s_at  | <i>NENF</i>      | 5.27  | 3.26  | 3.16  |
| 206765_at    | <i>KCNJ2</i>     | 10.75 | 6.4   | 6.78  |
| 1560451_at   | <i>PKN3</i>      | 3.73  | 2.27  | 2.3   |
| 237533_at    | <i>LOC647049</i> | 4.645 | 2.905 | 2.795 |
| 237954_x_at  | <i>NA</i>        | 6.355 | 3.945 | 3.855 |
| 224321_at    | <i>TMEFF2</i>    | 13.28 | 8.01  | 8.31  |
| 235887_at    | <i>NA</i>        | 4.405 | 2.705 | 2.705 |
| 241927_x_at  | <i>CDC34</i>     | 4.795 | 2.955 | 2.955 |
| 231248_at    | <i>CST6</i>      | 3.835 | 2.375 | 2.345 |
| 1555272_at   | <i>LOC285927</i> | 9.375 | 5.805 | 5.745 |
| 218848_at    | <i>THOC6</i>     | 3.69  | 2.3   | 2.25  |
| 221423_s_at  | <i>YIPF5</i>     | 9.835 | 5.895 | 6.225 |
| 241975_at    | <i>LOC399959</i> | 5.53  | 3.42  | 3.41  |
| 225726_s_at  | <i>PLEKHH1</i>   | 5.085 | 3.195 | 3.095 |
| 226811_at    | <i>FAM46C</i>    | 7.54  | 4.53  | 4.79  |
| 201539_s_at  | <i>FHL1</i>      | 4.4   | 2.65  | 2.8   |
| 202935_s_at  | <i>FLJ37644</i>  | 10.32 | 6.36  | 6.41  |
| 233558_s_at  | <i>FLJ12716</i>  | 7.87  | 4.72  | 5.02  |
| 214437_s_at  | <i>SHMT2</i>     | 8.755 | 5.325 | 5.505 |
| 1555399_a at | <i>DUSP16</i>    | 5.395 | 3.335 | 3.345 |
| 219427_at    | <i>FAT4</i>      | 9.195 | 5.505 | 5.915 |
| 231650_s at  | <i>SEZ6L</i>     | 3.75  | 2.33  | 2.33  |
| 239461_at    | <i>GALNTL2</i>   | 5.45  | 3.44  | 3.34  |
| 224580_at    | <i>SLC38A1</i>   | 6.36  | 4.06  | 3.87  |

|              |                   |        |       |       |
|--------------|-------------------|--------|-------|-------|
| 231174_s_at  | <i>NA</i>         | 5.47   | 3.39  | 3.43  |
| 218748_s_at  | <i>EXOC5</i>      | 5.115  | 3.125 | 3.255 |
| 228235_at    | <i>MGC16121</i>   | 6.555  | 4.015 | 4.175 |
| 203961_at    | <i>NEBL</i>       | 3.68   | 2.31  | 2.29  |
| 229042_s_at  | <i>DYNClH1</i>    | 4.515  | 2.785 | 2.885 |
| 228665_at    | <i>CYYRI</i>      | 8.95   | 5.79  | 5.47  |
| 239247_at    | <i>LOC401577</i>  | 3.83   | 2.4   | 2.42  |
| 1553635_s_at | <i>TCTEX1D1</i>   | 4.775  | 2.985 | 3.035 |
| 242196_at    | <i>NA</i>         | 4.665  | 2.955 | 2.935 |
| 227545_at    | <i>NA</i>         | 6.03   | 3.79  | 3.83  |
| 212868_x_at  | <i>MAPKAPK5</i>   | 3.525  | 2.225 | 2.235 |
| 241902_at    | <i>MKX</i>        | 4.505  | 2.865 | 2.835 |
| 214001_x_at  | <i>FLJ20294</i>   | 12.215 | 7.785 | 7.675 |
| 213705_at    | <i>NA</i>         | 10.25  | 6.57  | 6.46  |
| 222329_x_at  | <i>NA</i>         | 5.215  | 3.225 | 3.405 |
| 1568377_x_at | <i>DEFB124</i>    | 4.425  | 2.835 | 2.805 |
| 220979_s_at  | <i>ST6GALNAC5</i> | 3.875  | 2.475 | 2.475 |
| 200908_s_at  | <i>RPLP2</i>      | 12.26  | 7.6   | 8.04  |
| 215384_s_at  | <i>MAP1A</i>      | 6.125  | 3.935 | 3.885 |
| 1552307_a_at | <i>C18orf17</i>   | 4.585  | 2.875 | 3.005 |
| 223925_s_at  | <i>LOC767558</i>  | 8.13   | 5.26  | 5.16  |
| 205794_s_at  | <i>NOVA1</i>      | 3.215  | 2.055 | 2.065 |
| 213561_at    | <i>ASF1A</i>      | 3.75   | 2.39  | 2.43  |
| 1559585_at   | <i>FLJ31033</i>   | 3.65   | 2.3   | 2.39  |
| 1559315_s_at | <i>LOC144481</i>  | 4.36   | 2.81  | 2.79  |
| 214283_at    | <i>IFT20</i>      | 7.135  | 4.735 | 4.465 |
| 217580_x_at  | <i>ARL6IP2</i>    | 4.39   | 2.84  | 2.82  |
| 231513_at    | <i>NA</i>         | 12.735 | 7.965 | 8.495 |
| 209739_s_at  | <i>PNPLA4</i>     | 4.095  | 2.645 | 2.655 |
| 1555970_at   | <i>FBXO28</i>     | 4.98   | 3.27  | 3.17  |
| 232411_at    | <i>NA</i>         | 4.205  | 2.735 | 2.715 |

|              |                  |        |       |       |
|--------------|------------------|--------|-------|-------|
| 229397_s_at  | <i>GRLF1</i>     | 7.75   | 5.01  | 5.05  |
| 211347_at    | <i>CDC14B</i>    | 6.49   | 4.2   | 4.22  |
| 204437_s_at  | <i>FOLR1</i>     | 4.43   | 2.92  | 2.86  |
| 244066_at    | <i>DENND4C</i>   | 5.185  | 3.425 | 3.345 |
| 1566163_at   | <i>MEIS2</i>     | 4.415  | 2.885 | 2.875 |
| 229671_s_at  | <i>C21orf45</i>  | 6.17   | 3.98  | 4.08  |
| 230867_at    | <i>LOC131873</i> | 3.415  | 2.235 | 2.225 |
| 233546_at    | <i>LOC283075</i> | 4.11   | 2.71  | 2.67  |
| 213813_x_at  | <i>RNPS1</i>     | 10.205 | 6.865 | 6.475 |
| 204301_at    | <i>KBTBD11</i>   | 3.75   | 2.45  | 2.46  |
| 235649_at    | <i>ADAMTS8</i>   | 3.19   | 2.09  | 2.09  |
| 1568997_at   | <i>NA</i>        | 4.425  | 2.955 | 2.855 |
| 214691_x_at  | <i>FAM63B</i>    | 6.635  | 4.405 | 4.295 |
| 236335_at    | <i>NA</i>        | 5      | 3.35  | 3.21  |
| 218858_at    | <i>DEPDC6</i>    | 6.89   | 4.42  | 4.64  |
| 1559485_at   | <i>C14orf103</i> | 3.955  | 2.535 | 2.665 |
| 210333_at    | <i>NR5A1</i>     | 3.635  | 2.395 | 2.385 |
| 229806_at    | <i>QRICHI</i>    | 8.65   | 5.63  | 5.75  |
| 242972_at    | <i>TRIM26</i>    | 4.085  | 2.735 | 2.635 |
| 243466_at    | <i>NA</i>        | 4.415  | 2.955 | 2.865 |
| 231098_at    | <i>NA</i>        | 4.205  | 2.785 | 2.745 |
| 219738_s_at  | <i>PCDH9</i>     | 4.17   | 2.77  | 2.73  |
| 216875_x_at  | <i>HAB1</i>      | 4.535  | 3.025 | 2.955 |
| 232497_at    | <i>ZNF3</i>      | 4.675  | 3.145 | 3.035 |
| 228913_at    | <i>LOC728913</i> | 8.86   | 5.81  | 5.91  |
| 229584_at    | <i>LRRK2</i>     | 4.185  | 2.775 | 2.765 |
| 1555772_a at | <i>CDC25A</i>    | 4.21   | 2.79  | 2.79  |
| 213054_at    | <i>KIAA0841</i>  | 4.525  | 3.055 | 2.955 |
| 241667_x_at  | <i>FOXO1A</i>    | 4.04   | 2.71  | 2.65  |
| 218172_s_at  | <i>DERL1</i>     | 9.38   | 6.15  | 6.29  |
| 244115_at    | <i>FAM126A</i>   | 7.045  | 4.595 | 4.745 |

|              |                  |        |       |       |
|--------------|------------------|--------|-------|-------|
| 214057_at    | <i>MCL1</i>      | 9.13   | 6.01  | 6.12  |
| 229458_s_at  | <i>GALK1</i>     | 3.9    | 2.6   | 2.6   |
| 210984_x_at  | <i>EGFR</i>      | 3.315  | 2.215 | 2.215 |
| 1570364_at   | <i>ZNF564</i>    | 4.45   | 3.05  | 2.89  |
| 207570_at    | <i>SHOX</i>      | 3.49   | 2.33  | 2.33  |
| 214149_s_at  | <i>ATP6V0E1</i>  | 11.195 | 7.455 | 7.525 |
| 1552596_at   | <i>GAS2L2</i>    | 3.725  | 2.495 | 2.485 |
| 1555097_a_at | <i>PTGFR</i>     | 4.64   | 3.08  | 3.16  |
| 243834_at    | <i>TNRC6A</i>    | 5.335  | 3.625 | 3.555 |
| 1557840_at   | <i>EFHB</i>      | 4.22   | 2.85  | 2.83  |
| 231798_at    | <i>NOG</i>       | 11.52  | 7.61  | 7.92  |
| 214000_s_at  | <i>RGS10</i>     | 5.265  | 3.505 | 3.585 |
| 1561500_at   | <i>LOC348180</i> | 4.595  | 3.145 | 3.045 |
| 239341_at    | <i>VDP</i>       | 3.555  | 2.425 | 2.365 |
| 223640_at    | <i>HCST</i>      | 5.025  | 3.435 | 3.345 |
| 204540_at    | <i>EEF1A2</i>    | 3.89   | 2.63  | 2.63  |
| 214484_s_at  | <i>OPRS1</i>     | 4.39   | 2.95  | 2.99  |
| 205111_s_at  | <i>PLCE1</i>     | 5.805  | 4.025 | 3.825 |
| 214892_x_at  | <i>C19orf29</i>  | 3.515  | 2.375 | 2.375 |
| 214041_x_at  | <i>RPL37A</i>    | 8.955  | 5.905 | 6.215 |
| 218122_s_at  | <i>SENP2</i>     | 5.93   | 4.13  | 3.9   |
| 213439_x_at  | <i>RPIP8</i>     | 4.33   | 2.95  | 2.91  |
| 214313_s_at  | <i>EIF5B</i>     | 6.515  | 4.425 | 4.415 |
| 205731_s_at  | <i>NCOA2</i>     | 6.29   | 4.34  | 4.2   |
| 201718_s_at  | <i>EPB41L2</i>   | 8.21   | 5.47  | 5.67  |
| 233496_s_at  | <i>CFL2</i>      | 9.425  | 6.525 | 6.275 |
| 210113_s_at  | <i>NLRP1</i>     | 3.345  | 2.265 | 2.265 |
| 232331_at    | <i>PPARG</i>     | 3.99   | 2.71  | 2.72  |
| 1560866_at   | <i>WNK2</i>      | 3.405  | 2.325 | 2.315 |
| 205330_at    | <i>MNI</i>       | 8.655  | 6.045 | 5.735 |
| 221960_s_at  | <i>RAB2A</i>     | 8.405  | 5.735 | 5.715 |

|              |                 |        |       |       |
|--------------|-----------------|--------|-------|-------|
| 229689_s_at  | <i>DLG5</i>     | 10.635 | 7.055 | 7.425 |
| 217257_at    | <i>NA</i>       | 4.485  | 3.115 | 3.005 |
| 236389_x_at  | <i>OIT3</i>     | 3.935  | 2.655 | 2.725 |
| 209159_s_at  | <i>NDRG4</i>    | 3.51   | 2.4   | 2.41  |
| 210814_at    | <i>TRPC3</i>    | 4.375  | 3.025 | 2.965 |
| 1552885_a_at | <i>NKX6-3</i>   | 3.69   | 2.52  | 2.54  |
| 202812_at    | <i>GAA</i>      | 4.895  | 3.295 | 3.425 |
| 214807_at    | <i>NA</i>       | 6.58   | 4.54  | 4.5   |
| 213621_s_at  | <i>GUK1</i>     | 6.58   | 4.62  | 4.42  |
| 204189_at    | <i>RARG</i>     | 2.795  | 1.915 | 1.915 |
| 225768_at    | <i>NR1D2</i>    | 12.56  | 8.79  | 8.49  |
| 206410_at    | <i>NR0B2</i>    | 3.21   | 2.23  | 2.19  |
| 204994_at    | <i>MX2</i>      | 3.07   | 2.11  | 2.11  |
| 234773_x_at  | <i>NA</i>       | 3.66   | 2.53  | 2.5   |
| 1556322_a_at | <i>TJAP1</i>    | 3.795  | 2.565 | 2.655 |
| 229787_s_at  | <i>NA</i>       | 11.375 | 7.875 | 7.785 |
| 227349_at    | <i>HELLS</i>    | 4.085  | 2.795 | 2.825 |
| 213652_at    | <i>PCSK5</i>    | 7.595  | 5.305 | 5.165 |
| 1552856_at   | <i>TMEM148</i>  | 3.54   | 2.44  | 2.44  |
| 221890_at    | <i>ZNF335</i>   | 3.705  | 2.595 | 2.525 |
| 231387_at    | <i>C6orf145</i> | 8.665  | 6.095 | 5.865 |
| 1567252_at   | <i>OR10D3P</i>  | 4.25   | 2.94  | 2.93  |
| 205297_s_at  | <i>CD79B</i>    | 3.865  | 2.705 | 2.625 |
| 243135_x_at  | <i>NA</i>       | 4.66   | 3.24  | 3.2   |
| 213488_at    | <i>SNED1</i>    | 7.695  | 5.345 | 5.285 |
| 217315_s_at  | <i>KLK13</i>    | 3.05   | 2.11  | 2.11  |
| 32402_s_at   | <i>SYMPK</i>    | 3.335  | 2.315 | 2.315 |
| 229636_at    | <i>CACNA2D2</i> | 3.295  | 2.275 | 2.275 |
| 212362_at    | <i>ATP2A2</i>   | 3.65   | 2.53  | 2.53  |
| 1567540_at   | <i>SPAG10</i>   | 3.765  | 2.625 | 2.595 |
| 209692_at    | <i>EYA2</i>     | 3.54   | 2.46  | 2.46  |

|              |                  |        |       |       |
|--------------|------------------|--------|-------|-------|
| 1559808_at   | <i>PLEC1</i>     | 3.53   | 2.45  | 2.45  |
| 208791_at    | <i>CLU</i>       | 3.715  | 2.595 | 2.565 |
| 230576_at    | <i>BLOC1S3</i>   | 4.65   | 3.2   | 3.26  |
| 1555181_a_at | <i>ST3GAL3</i>   | 3.125  | 2.165 | 2.175 |
| 203071_at    | <i>SEMA3B</i>    | 3.88   | 2.71  | 2.69  |
| 202374_s_at  | <i>RAB3GAP2</i>  | 9.565  | 6.795 | 6.525 |
| 1559667_at   | <i>NA</i>        | 4.86   | 3.43  | 3.34  |
| 230156_x_at  | <i>CHD2</i>      | 6.33   | 4.43  | 4.39  |
| 230940_at    | <i>REXO1</i>     | 3.595  | 2.505 | 2.495 |
| 209307_at    | <i>SWAP70</i>    | 13.49  | 9.29  | 9.49  |
| 1554106_at   | <i>ALS2CR16</i>  | 8      | 5.64  | 5.51  |
| 1563431_x_at | <i>CALM3</i>     | 11.305 | 7.945 | 7.815 |
| 218881_s_at  | <i>FOSL2</i>     | 3.31   | 2.31  | 2.3   |
| 229784_at    | <i>MGC16121</i>  | 8.165  | 5.745 | 5.635 |
| 223517_at    | <i>FBXO44</i>    | 4.655  | 3.245 | 3.255 |
| 201427_s_at  | <i>SEPP1</i>     | 12.005 | 8.395 | 8.365 |
| 205559_s_at  | <i>PCSK5</i>     | 5.805  | 4.035 | 4.065 |
| 206140_at    | <i>LHX2</i>      | 3.425  | 2.395 | 2.385 |
| 204795_at    | <i>PRR3</i>      | 3.685  | 2.565 | 2.575 |
| 216116_at    | <i>NCKIPSD</i>   | 2.945  | 2.065 | 2.055 |
| 232811_x_at  | <i>PRICKLE1</i>  | 4.935  | 3.495 | 3.415 |
| 237236_x_at  | <i>LOC731789</i> | 3.53   | 2.49  | 2.45  |
| 213560_at    | <i>GADD45B</i>   | 5.435  | 3.825 | 3.775 |
| 1569274_at   | <i>LOC283551</i> | 3.46   | 2.43  | 2.41  |
| 1563357_at   | <i>NA</i>        | 5.01   | 3.47  | 3.55  |
| 1563902_at   | <i>SPSB1</i>     | 3.495  | 2.485 | 2.415 |
| 243120_at    | <i>NA</i>        | 3.54   | 2.48  | 2.48  |
| 227488_at    | <i>MGC16121</i>  | 2.94   | 2.06  | 2.06  |
| 236908_at    | <i>ACPL2</i>     | 3.91   | 2.73  | 2.77  |
| 241797_at    | <i>NFIX</i>      | 3.545  | 2.495 | 2.485 |
| 1552306_at   | <i>ALG10</i>     | 4.18   | 2.91  | 2.97  |



|              |                 |        |       |       |
|--------------|-----------------|--------|-------|-------|
| 242336_at    | <i>NA</i>       | 8.005  | 5.645 | 5.635 |
| 204939_s_at  | <i>PLN</i>      | 3.95   | 2.78  | 2.79  |
| 1554918_a_at | <i>ABCC4</i>    | 3.26   | 2.3   | 2.3   |
| 230879_at    | <i>BAG2</i>     | 5.92   | 4.07  | 4.28  |
| AFFX-BioB-3  | <i>NA</i>       | 11.775 | 8.455 | 8.165 |
| 228871_at    | <i>ALG14</i>    | 3.07   | 2.14  | 2.2   |
| 1569949_at   | <i>GRK5</i>     | 2.25   | 1.58  | 1.6   |
| 231508_s_at  | <i>NA</i>       | 10.385 | 7.405 | 7.275 |
| 203968_s_at  | <i>CDC6</i>     | 3.835  | 2.735 | 2.695 |
| 227533_at    | <i>RALGPS2</i>  | 8.39   | 6.07  | 5.79  |
| 235723_at    | <i>BNC2</i>     | 3.33   | 2.33  | 2.37  |
| 225934_at    | <i>MRPL20</i>   | 7.725  | 5.535 | 5.385 |
| 242592_at    | <i>GPRI37C</i>  | 6.035  | 4.195 | 4.345 |
| 225309_at    | <i>PHF5A</i>    | 7.11   | 5.11  | 4.95  |
| 218406_x_at  | <i>NENF</i>     | 4.38   | 3.09  | 3.11  |
| 216269_s_at  | <i>ELN</i>      | 3.505  | 2.495 | 2.475 |
| 1570249_x_at | <i>GNB1</i>     | 3.62   | 2.52  | 2.6   |
| 239093_at    | <i>C10orf65</i> | 2.705  | 1.925 | 1.925 |
| AFFX-r2-Ec-b | <i>NA</i>       | 12.135 | 8.685 | 8.515 |
| 236479_at    | <i>NA</i>       | 3.465  | 2.465 | 2.455 |
| 205684_s_at  | <i>DENND4C</i>  | 9.165  | 6.595 | 6.415 |
| 242484_at    | <i>TTC9B</i>    | 3.415  | 2.415 | 2.425 |
| 202446_s_at  | <i>PLSCR1</i>   | 9.965  | 7.125 | 7.035 |
| 243575_at    | <i>MAST4</i>    | 3.355  | 2.375 | 2.375 |
| 242022_at    | <i>PBX1</i>     | 6.76   | 4.88  | 4.72  |
| 223079_s_at  | <i>GLS</i>      | 13.09  | 9.35  | 9.27  |
| 231988_x_at  | <i>ZNF490</i>   | 5.28   | 3.82  | 3.69  |
| 237632_at    | <i>HERC1</i>    | 4.335  | 3.105 | 3.085 |
| 237439_at    | <i>USP43</i>    | 4.835  | 3.535 | 3.375 |
| 1553328_a_at | <i>SLC18A2</i>  | 3.075  | 2.185 | 2.195 |
| 243365_s_at  | <i>AUTS2</i>    | 4.345  | 3.055 | 3.155 |

|              |                  |        |       |       |
|--------------|------------------|--------|-------|-------|
| 1555953_at   | <i>SLC19A1</i>   | 3.84   | 2.72  | 2.76  |
| 1553647_at   | <i>CDYL2</i>     | 4.245  | 3.015 | 3.035 |
| 206438_x_at  | <i>C12orf38</i>  | 8.535  | 6.225 | 5.995 |
| 236439_at    | <i>BCL6</i>      | 7.035  | 4.935 | 5.145 |
| 1554476_x_at | <i>ZNF808</i>    | 4.61   | 3.25  | 3.36  |
| 223481_s_at  | <i>MRPL47</i>    | 7.025  | 5.155 | 4.935 |
| 1553686_at   | <i>C18orf25</i>  | 3.415  | 2.455 | 2.445 |
| 205636_at    | <i>SH3GL3</i>    | 3.085  | 2.205 | 2.215 |
| 238964_at    | <i>NA</i>        | 3.55   | 2.54  | 2.56  |
| 203289_s_at  | <i>C16orf35</i>  | 5.36   | 3.93  | 3.76  |
| 1557052_at   | <i>NA</i>        | 4.075  | 2.955 | 2.905 |
| 222434_at    | <i>ENAH</i>      | 10.68  | 7.59  | 7.77  |
| 218264_at    | <i>BCCIP</i>     | 8.385  | 5.905 | 6.175 |
| 240556_at    | <i>DCN</i>       | 7.255  | 5.125 | 5.315 |
| 227821_at    | <i>LG14</i>      | 3.685  | 2.655 | 2.645 |
| 1559343_at   | <i>SNRPN</i>     | 6.965  | 5.035 | 5.005 |
| 231193_s_at  | <i>NA</i>        | 10.495 | 7.625 | 7.495 |
| 219180_s_at  | <i>PEX26</i>     | 6.44   | 4.59  | 4.69  |
| 217159_x_at  | <i>SIGLEC7</i>   | 3.49   | 2.48  | 2.55  |
| 216943_at    | <i>NA</i>        | 3.03   | 2.19  | 2.18  |
| 237056_at    | <i>INSC</i>      | 4.32   | 3.12  | 3.12  |
| 232214_x_at  | <i>ZNF554</i>    | 3.54   | 2.52  | 2.6   |
| 215720_s_at  | <i>NFYA</i>      | 4.015  | 2.895 | 2.895 |
| 211123_at    | <i>SLC5A5</i>    | 3.575  | 2.545 | 2.615 |
| 1563512_at   | <i>NOS1AP</i>    | 3.67   | 2.66  | 2.64  |
| 242367_at    | <i>SLC38A1</i>   | 3.875  | 2.845 | 2.755 |
| 229090_at    | <i>LOC220930</i> | 3.785  | 2.765 | 2.715 |
| 223121_s_at  | <i>SFRP2</i>     | 3.565  | 2.585 | 2.575 |
| 217370_x_at  | <i>FUS</i>       | 4.315  | 3.075 | 3.165 |
| 1555888_at   | <i>EDDI</i>      | 4.86   | 3.56  | 3.48  |
| 1558450_at   | <i>A2M</i>       | 3      | 2.17  | 2.18  |

|              |                   |        |       |       |
|--------------|-------------------|--------|-------|-------|
| 1553586_at   | <i>LOC283932</i>  | 3.68   | 2.66  | 2.67  |
| 204658_at    | <i>TRA2A</i>      | 10.3   | 7.36  | 7.56  |
| 1557357_at   | <i>LOC440944</i>  | 3.84   | 2.78  | 2.78  |
| 241210_at    | <i>MYO1D</i>      | 3.355  | 2.435 | 2.435 |
| 232600_at    | <i>ANKRD42</i>    | 6.66   | 4.71  | 4.93  |
| 216246_at    | <i>NA</i>         | 13.325 | 9.585 | 9.735 |
| 1552271_at   | <i>MGC24975</i>   | 2.855  | 2.045 | 2.095 |
| 1565730_at   | <i>NA</i>         | 3.105  | 2.245 | 2.255 |
| 215436_at    | <i>HSDL2</i>      | 4.24   | 3.15  | 3.01  |
| 208421_at    | <i>NA</i>         | 3.57   | 2.59  | 2.59  |
| 1558011_at   | <i>SMA5</i>       | 4.1    | 3.01  | 2.95  |
| 204112_s_at  | <i>HNMT</i>       | 9.525  | 7.035 | 6.805 |
| 231016_s_at  | <i>ARNT</i>       | 10.53  | 7.64  | 7.67  |
| 207968_s_at  | <i>MEF2C</i>      | 2.79   | 2.03  | 2.03  |
| 228193_s_at  | <i>RGC32</i>      | 3.565  | 2.595 | 2.585 |
| 244144_at    | <i>SYNE1</i>      | 3.975  | 2.885 | 2.895 |
| 214267_s_at  | <i>CADM4</i>      | 3.18   | 2.32  | 2.31  |
| 1568764_x_at | <i>PDCD6</i>      | 4.93   | 3.57  | 3.61  |
| 241015_at    | <i>NA</i>         | 3.39   | 2.48  | 2.46  |
| 210129_s_at  | <i>TLL3</i>       | 3.33   | 2.41  | 2.45  |
| 213951_s_at  | <i>PSMC3IP</i>    | 9.865  | 7.075 | 7.295 |
| 1564463_at   | <i>LOC283711</i>  | 3.69   | 2.67  | 2.71  |
| 228473_at    | <i>MSX1</i>       | 6.93   | 5.03  | 5.07  |
| 244709_at    | <i>NA</i>         | 3.065  | 2.235 | 2.225 |
| 236351_at    | <i>LOC389023</i>  | 3.4    | 2.48  | 2.48  |
| 230482_at    | <i>ST6GALNAC5</i> | 3.345  | 2.455 | 2.425 |
| 222585_x_at  | <i>KRCC1</i>      | 7.215  | 5.375 | 5.145 |
| 216183_at    | <i>TGM2</i>       | 2.755  | 2.005 | 2.015 |
| 37577_at     | <i>ARHGAP19</i>   | 5.165  | 3.845 | 3.695 |
| 213640_s_at  | <i>LOX</i>        | 3.19   | 2.35  | 2.31  |
| 202648_at    | <i>RPS19</i>      | 10.31  | 7.65  | 7.42  |

|              |                  |        |       |       |
|--------------|------------------|--------|-------|-------|
| 224348_s_at  | <i>HI9</i>       | 3.325  | 2.425 | 2.435 |
| 241700_at    | <i>ZFHX4</i>     | 3.79   | 2.76  | 2.78  |
| 1562081_a_at | <i>NA</i>        | 4.115  | 3.005 | 3.015 |
| 225762_x_at  | <i>LOC284801</i> | 5.13   | 3.78  | 3.72  |
| 205140_at    | <i>FPGT</i>      | 6.13   | 4.45  | 4.53  |
| 228232_s_at  | <i>VSIG2</i>     | 2.95   | 2.16  | 2.15  |
| 229931_at    | <i>REPIN1</i>    | 3.49   | 2.58  | 2.52  |
| 201540_at    | <i>FHL1</i>      | 14.81  | 10.91 | 10.78 |
| 202972_s_at  | <i>FAM13A1</i>   | 3.2    | 2.32  | 2.37  |
| 213006_at    | <i>KIAA0146</i>  | 3.88   | 2.85  | 2.84  |
| 1559696_at   | <i>NA</i>        | 3.695  | 2.715 | 2.705 |
| 223791_at    | <i>FAM27A</i>    | 3.42   | 2.5   | 2.5   |
| AFFX-r2-Ec-b | <i>NA</i>        | 12.37  | 9.27  | 8.87  |
| 236324_at    | <i>MBP</i>       | 3.055  | 2.235 | 2.235 |
| 240773_at    | <i>TRIO</i>      | 3.935  | 2.925 | 2.855 |
| 228161_at    | <i>RAB32</i>     | 3.01   | 2.21  | 2.2   |
| 206707_x_at  | <i>C6orf32</i>   | 6.92   | 5.18  | 4.98  |
| 224579_at    | <i>SLC38A1</i>   | 11.525 | 8.435 | 8.495 |
| 1569330_at   | <i>NA</i>        | 3.105  | 2.285 | 2.275 |
| 219740_at    | <i>VASH2</i>     | 3.11   | 2.29  | 2.29  |
| 209750_at    | <i>NR1D2</i>     | 11.605 | 8.475 | 8.605 |
| 201081_s_at  | <i>PIP5K2B</i>   | 4.955  | 3.665 | 3.635 |
| 218325_s_at  | <i>DIDO1</i>     | 5.255  | 3.815 | 3.925 |
| 1554229_at   | <i>LOC153222</i> | 3.205  | 2.375 | 2.345 |
| 210321_at    | <i>GZMH</i>      | 3.135  | 2.315 | 2.315 |
| 220285_at    | <i>C9orf77</i>   | 3.215  | 2.365 | 2.375 |
| 1570366_x_at | <i>ZNF564</i>    | 3.41   | 2.52  | 2.5   |
| 221470_s_at  | <i>IL1F7</i>     | 3.42   | 2.52  | 2.52  |
| 1552980_at   | <i>HAS3</i>      | 3.815  | 2.805 | 2.825 |
| 212517_at    | <i>ATRN</i>      | 9.73   | 7.07  | 7.27  |
| 232145_at    | <i>USP39</i>     | 3.88   | 2.86  | 2.86  |

|              |                 |        |       |       |
|--------------|-----------------|--------|-------|-------|
| 209437_s_at  | <i>SPONI</i>    | 3.125  | 2.305 | 2.305 |
| 225123_at    | <i>NA</i>       | 7.81   | 5.67  | 5.86  |
| 207872_s_at  | <i>LILRA1</i>   | 3.51   | 2.59  | 2.59  |
| 1555558_at   | <i>USP25</i>    | 3.945  | 2.925 | 2.895 |
| 1569728_at   | <i>NA</i>       | 3.57   | 2.66  | 2.61  |
| 238669_at    | <i>PTGS1</i>    | 11.56  | 8.58  | 8.5   |
| 244691_at    | <i>SETD5</i>    | 3.745  | 2.765 | 2.765 |
| 1552274_at   | <i>PXK</i>      | 8.37   | 6.08  | 6.3   |
| 219142_at    | <i>RASL11B</i>  | 8.66   | 6.32  | 6.48  |
| 219577_s_at  | <i>ABCA7</i>    | 3.83   | 2.84  | 2.83  |
| 212389_at    | <i>SBF1</i>     | 3.21   | 2.38  | 2.37  |
| 204251_s_at  | <i>CEP164</i>   | 5.985  | 4.385 | 4.465 |
| 210921_at    | <i>NA</i>       | 3.405  | 2.525 | 2.515 |
| 210733_at    | <i>TRAMI</i>    | 12.56  | 9.16  | 9.43  |
| 242856_at    | <i>NA</i>       | 8.46   | 6.19  | 6.33  |
| AFFX-r2-Ec-b | <i>NA</i>       | 12.415 | 9.375 | 9.005 |
| 1562235_s_at | <i>PBX1</i>     | 3.45   | 2.56  | 2.54  |
| 220442_at    | <i>GALNT4</i>   | 3.105  | 2.325 | 2.275 |
| 1562477_at   | <i>EBF2</i>     | 3.465  | 2.575 | 2.565 |
| 204415_at    | <i>IFI6</i>     | 5.16   | 3.77  | 3.88  |
| 206105_at    | <i>AFF2</i>     | 2.85   | 2.13  | 2.09  |
| 219205_at    | <i>SRR</i>      | 7.375  | 5.435 | 5.505 |
| 224987_at    | <i>C6orf89</i>  | 3.48   | 2.58  | 2.58  |
| 225604_s_at  | <i>C9orf19</i>  | 7.65   | 5.72  | 5.62  |
| 1559812_at   | <i>NA</i>       | 2.95   | 2.2   | 2.18  |
| 217053_x_at  | <i>ETV1</i>     | 3.19   | 2.36  | 2.37  |
| 1559450_at   | <i>NAALADL2</i> | 3.685  | 2.755 | 2.725 |
| 1555063_at   | <i>USP6</i>     | 4.095  | 3.075 | 3.005 |
| AFFX-BioC-5  | <i>NA</i>       | 12.6   | 9.56  | 9.16  |
| 241896_at    | <i>MACF1</i>    | 3.215  | 2.385 | 2.395 |
| 1559237_a_at | <i>NA</i>       | 3.05   | 2.27  | 2.27  |

|              |                      |        |        |        |
|--------------|----------------------|--------|--------|--------|
| 236772_s_at  | <i>NA</i>            | 9.81   | 7.42   | 7.17   |
| 223895_s_at  | <i>EPN3</i>          | 3.705  | 2.775  | 2.745  |
| 1559535_s_at | <i>NA</i>            | 4.69   | 3.51   | 3.47   |
| 232609_at    | <i>CRB3</i>          | 3.99   | 2.96   | 2.98   |
| 241165_at    | <i>DCAMKL1</i>       | 3.68   | 2.75   | 2.73   |
| 222968_at    | <i>NA</i>            | 11.37  | 8.59   | 8.35   |
| 224022_x_at  | <i>WNT16</i>         | 9.98   | 7.36   | 7.51   |
| 223453_s_at  | <i>DKFZP564J0863</i> | 3.39   | 2.52   | 2.53   |
| 205769_at    | <i>SLC27A2</i>       | 3.685  | 2.785  | 2.705  |
| 216139_s_at  | <i>MAPK8IP3</i>      | 3.405  | 2.545  | 2.545  |
| 238335_at    | <i>DNAJA5</i>        | 4.06   | 3.02   | 3.03   |
| 205598_at    | <i>TRAIIP</i>        | 2.83   | 2.11   | 2.11   |
| 244285_at    | <i>KIF6</i>          | 3.64   | 2.72   | 2.72   |
| 1554258_a_at | <i>DNAJC5B</i>       | 3.055  | 2.285  | 2.275  |
| 212915_at    | <i>PDZRN3</i>        | 13.445 | 10.025 | 10.065 |
| 1553235_at   | <i>PCDHAC1</i>       | 3.105  | 2.325  | 2.325  |
| 231411_at    | <i>LHFP</i>          | 10.63  | 7.84   | 8.05   |
| 231642_at    | <i>C6orf201</i>      | 3.385  | 2.535  | 2.525  |
| 227744_s_at  | <i>HNRPD</i>         | 4.385  | 3.215  | 3.345  |
| 211696_x_at  | <i>HBB</i>           | 2.865  | 2.145  | 2.145  |
| 230214_at    | <i>MRVII</i>         | 8.485  | 6.335  | 6.355  |
| 210037_s_at  | <i>NOS2A</i>         | 2.845  | 2.135  | 2.125  |
| 209970_x_at  | <i>CASP1</i>         | 3.135  | 2.345  | 2.355  |
| 223906_s_at  | <i>TEX101</i>        | 3.435  | 2.575  | 2.575  |
| 218237_s_at  | <i>SLC38A1</i>       | 11.55  | 8.82   | 8.48   |
| 223910_at    | <i>ERN2</i>          | 4.575  | 3.495  | 3.375  |
| 201787_at    | <i>FBLN1</i>         | 9.51   | 7.25   | 7.01   |
| 205352_at    | <i>SERPINI1</i>      | 8.915  | 6.815  | 6.565  |
| 241990_at    | <i>RHOV</i>          | 3.77   | 2.84   | 2.82   |
| 240677_at    | <i>NA</i>            | 2.86   | 2.12   | 2.16   |
| 208269_s_at  | <i>ADAM28</i>        | 2.97   | 2.23   | 2.23   |

|              |                  |       |       |       |
|--------------|------------------|-------|-------|-------|
| 217473_x_at  | <i>SLC11A1</i>   | 3.235 | 2.435 | 2.425 |
| 240167_at    | <i>LOC152742</i> | 3.91  | 2.95  | 2.91  |
| 1559702_at   | <i>NA</i>        | 3.505 | 2.635 | 2.625 |
| 1557712_x_at | <i>NA</i>        | 5.265 | 3.975 | 3.915 |
| 208228_s_at  | <i>FGFR2</i>     | 4.075 | 3.055 | 3.065 |
| 223905_at    | <i>CCDC135</i>   | 3.05  | 2.29  | 2.29  |
| 207215_at    | <i>HS322B1A</i>  | 3.315 | 2.495 | 2.495 |
| 206543_at    | <i>SMARCA2</i>   | 6.04  | 4.49  | 4.59  |
| 217481_x_at  | <i>FLJ45455</i>  | 3.675 | 2.765 | 2.755 |
| 204229_at    | <i>SLC17A7</i>   | 2.93  | 2.22  | 2.19  |
| 208185_x_at  | <i>NA</i>        | 3.805 | 2.875 | 2.845 |
| 1557124_at   | <i>LOC440104</i> | 3.4   | 2.56  | 2.56  |
| 201694_s_at  | <i>EGR1</i>      | 12.04 | 9     | 9.11  |
| 207788_s_at  | <i>SORBS3</i>    | 3.56  | 2.72  | 2.64  |
| 229803_s_at  | <i>NA</i>        | 10.03 | 7.54  | 7.56  |
| 220532_s_at  | <i>TMEM176B</i>  | 3.295 | 2.485 | 2.475 |
| 226672_s_at  | <i>HDAC10</i>    | 4.23  | 3.2   | 3.18  |
| 209897_s_at  | <i>SLIT2</i>     | 8.145 | 6.215 | 6.065 |
| 208920_at    | <i>SRI</i>       | 6.51  | 4.99  | 4.83  |
| 205813_s_at  | <i>MAT1A</i>     | 3.82  | 2.88  | 2.88  |
| 241765_at    | <i>CPM</i>       | 5.225 | 3.935 | 3.945 |
| 244152_at    | <i>SCHIP1</i>    | 3.34  | 2.52  | 2.52  |
| 239619_at    | <i>ZNF395</i>    | 3.34  | 2.56  | 2.48  |
| 203222_s_at  | <i>TLE1</i>      | 6.03  | 4.63  | 4.48  |
| 201404_x_at  | <i>PSMB2</i>     | 4.545 | 3.475 | 3.385 |
| 224023_s_at  | <i>C3orf10</i>   | 10.29 | 7.83  | 7.72  |
| 244571_s_at  | <i>TTC12</i>     | 3.965 | 2.995 | 3.005 |
| 221550_at    | <i>COX15</i>     | 5.795 | 4.405 | 4.355 |
| 236742_at    | <i>ARFGEF1</i>   | 4.095 | 3.125 | 3.065 |
| 244353_s_at  | <i>SLC2A12</i>   | 3.68  | 2.79  | 2.77  |
| 221715_at    | <i>MYST3</i>     | 6.755 | 5.145 | 5.075 |

|              |                  |        |       |       |
|--------------|------------------|--------|-------|-------|
| 237604_at    | <i>CNTFR</i>     | 3.71   | 2.85  | 2.77  |
| 205168_at    | <i>DDR2</i>      | 9.835  | 7.485 | 7.385 |
| 242685_at    | <i>GTPBP8</i>    | 3.45   | 2.61  | 2.61  |
| 230428_at    | <i>THEM5</i>     | 3.31   | 2.51  | 2.5   |
| 1559924_at   | <i>SLC38A2</i>   | 4.11   | 3.12  | 3.1   |
| 1558530_at   | <i>LRTM2</i>     | 3.24   | 2.46  | 2.45  |
| 206249_at    | <i>MAP3K13</i>   | 3.47   | 2.66  | 2.6   |
| 1565554_at   | <i>LOC127841</i> | 3.825  | 2.915 | 2.885 |
| 1552713_a_at | <i>SLC4A1</i>    | 3.17   | 2.41  | 2.41  |
| 229109_s_at  | <i>BLVRA</i>     | 3.04   | 2.3   | 2.31  |
| 228278_at    | <i>NFIX</i>      | 10.515 | 8.035 | 7.915 |
| 219703_at    | <i>MNS1</i>      | 4.27   | 3.22  | 3.25  |
| 216794_at    | <i>NA</i>        | 3.17   | 2.42  | 2.4   |
| 238534_at    | <i>LRRFIP1</i>   | 3.48   | 2.68  | 2.6   |
| 214768_x_at  | <i>HLA-C</i>     | 3.095  | 2.355 | 2.345 |
| 239613_at    | <i>TMED3</i>     | 5.345  | 4.065 | 4.055 |
| 1559950_at   | <i>LOC729689</i> | 4.615  | 3.495 | 3.505 |
| 223495_at    | <i>CCDC8</i>     | 10.22  | 7.65  | 7.87  |
| 222556_at    | <i>ALG5</i>      | 2.795  | 2.125 | 2.115 |
| 220963_s_at  | <i>C1orf89</i>   | 3.07   | 2.33  | 2.33  |
| 235683_at    | <i>SESN3</i>     | 3.985  | 3.015 | 3.035 |
| 234332_at    | <i>NUB1</i>      | 4.84   | 3.65  | 3.71  |
| 1555065_x_at | <i>USP6</i>      | 3.815  | 2.905 | 2.885 |
| 233112_at    | <i>C9orf150</i>  | 3.705  | 2.795 | 2.845 |
| 238704_at    | <i>NA</i>        | 4.69   | 3.54  | 3.6   |
| 242840_at    | <i>DAB1</i>      | 3.16   | 2.39  | 2.42  |
| 233891_at    | <i>NA</i>        | 3.335  | 2.545 | 2.525 |
| 206416_at    | <i>ZNF205</i>    | 6.89   | 5.3   | 5.19  |
| 236940_at    | <i>NA</i>        | 3.075  | 2.335 | 2.335 |
| 201813_s_at  | <i>TBC1D5</i>    | 7.41   | 5.63  | 5.66  |
| 230451_at    | <i>C1orf136</i>  | 3.54   | 2.69  | 2.7   |



|              |                  |        |        |        |
|--------------|------------------|--------|--------|--------|
| 223400_s_at  | <i>PBI</i>       | 8.675  | 6.585  | 6.635  |
| 205505_at    | <i>GCNT1</i>     | 7.715  | 5.935  | 5.815  |
| 215295_at    | <i>DTNB</i>      | 2.995  | 2.275  | 2.275  |
| 206229_x_at  | <i>PAX2</i>      | 4.365  | 3.325  | 3.325  |
| 242371_x_at  | <i>NFAT5</i>     | 3.7    | 2.82   | 2.82   |
| 214422_at    | <i>RAD23B</i>    | 3.53   | 2.66   | 2.72   |
| 229562_at    | <i>RPL10A</i>    | 3.355  | 2.565  | 2.545  |
| 216385_at    | <i>LOC220077</i> | 3.525  | 2.685  | 2.685  |
| 230130_at    | <i>SLIT2</i>     | 14.005 | 10.605 | 10.765 |
| 220119_at    | <i>EPB41L4A</i>  | 3.02   | 2.31   | 2.29   |
| 221611_s_at  | <i>PHF7</i>      | 4.635  | 3.555  | 3.525  |
| 235790_at    | <i>CTAGE5</i>    | 3.05   | 2.37   | 2.29   |
| 207289_at    | <i>MMP25</i>     | 5.135  | 3.885  | 3.955  |
| 235858_at    | <i>CREBBP</i>    | 3.455  | 2.635  | 2.635  |
| 1565162_s_at | <i>MGST1</i>     | 8.08   | 6.06   | 6.29   |
| 228467_at    | <i>PURB</i>      | 2.98   | 2.27   | 2.28   |
| 239666_at    | <i>PYGO2</i>     | 3.375  | 2.605  | 2.555  |
| 241083_at    | <i>DBC1</i>      | 3.74   | 2.87   | 2.85   |
| 205779_at    | <i>RAMP2</i>     | 3.08   | 2.36   | 2.36   |
| 1555664_at   | <i>NA</i>        | 3.09   | 2.37   | 2.37   |
| 1552516_a_at | <i>HIPK1</i>     | 3.135  | 2.405  | 2.395  |
| 209769_s_at  | <i>GP1BB</i>     | 3.49   | 2.67   | 2.67   |
| 210456_at    | <i>PCYT1B</i>    | 3.805  | 2.945  | 2.895  |
| 220758_s_at  | <i>ROBO4</i>     | 3.135  | 2.405  | 2.395  |
| 220682_s_at  | <i>KLHL5</i>     | 5.91   | 4.5    | 4.56   |
| 1569793_at   | <i>SLC25A18</i>  | 3.615  | 2.775  | 2.765  |
| 230534_at    | <i>ZNF678</i>    | 3.845  | 2.945  | 2.945  |
| 1556787_s_at | <i>PDE5A</i>     | 3.51   | 2.71   | 2.68   |
| 236796_at    | <i>BACH2</i>     | 3.025  | 2.325  | 2.325  |
| 231366_at    | <i>KIAA1505</i>  | 3.035  | 2.335  | 2.335  |
| 242081_at    | <i>CENTB1</i>    | 3.79   | 2.89   | 2.93   |

|             |                 |       |       |       |
|-------------|-----------------|-------|-------|-------|
| 209223_at   | <i>IK</i>       | 3.1   | 2.37  | 2.39  |
| 208590_x_at | <i>GJA3</i>     | 3     | 2.3   | 2.3   |
| 219695_at   | <i>SMPD3</i>    | 3.2   | 2.46  | 2.46  |
| 222665_at   | <i>FAM82B</i>   | 7.245 | 5.645 | 5.485 |
| 235343_at   | <i>NA</i>       | 3.335 | 2.575 | 2.545 |
| 224140_at   | <i>NPCDR1</i>   | 3.28  | 2.52  | 2.51  |
| 1555452_at  | <i>RALGPS1</i>  | 3.69  | 2.81  | 2.86  |
| 211546_x_at | <i>SNCA</i>     | 4.57  | 3.56  | 3.46  |
| 203010_at   | <i>STAT5A</i>   | 3.09  | 2.33  | 2.41  |
| 225979_at   | <i>PLEKHG2</i>  | 3.11  | 2.39  | 2.39  |
| 237784_at   | <i>SUB1</i>     | 3.145 | 2.415 | 2.425 |
| 229619_at   | <i>FOLR2</i>    | 4.08  | 3.16  | 3.11  |
| 210436_at   | <i>CCT8</i>     | 3.12  | 2.4   | 2.4   |
| 221801_x_at | <i>NEFL</i>     | 4.225 | 3.285 | 3.205 |
| 232495_x_at | <i>CUGBP1</i>   | 3.065 | 2.345 | 2.375 |
| 236371_s_at | <i>TGSI</i>     | 3.145 | 2.435 | 2.415 |
| 222784_at   | <i>SMOC1</i>    | 3.015 | 2.355 | 2.285 |
| 238268_at   | <i>NA</i>       | 3.67  | 2.83  | 2.83  |
| 215182_x_at | <i>MYH9</i>     | 4.505 | 3.505 | 3.425 |
| 228404_at   | <i>IRX2</i>     | 3.825 | 2.925 | 2.965 |
| 238238_at   | <i>NA</i>       | 3.085 | 2.405 | 2.365 |
| 220272_at   | <i>BNC2</i>     | 3.725 | 2.865 | 2.875 |
| 242458_at   | <i>RALGPS2</i>  | 4.725 | 3.665 | 3.615 |
| 1570303_at  | <i>NA</i>       | 3.955 | 3.045 | 3.055 |
| 1558238_at  | <i>KIAA1856</i> | 3.295 | 2.545 | 2.525 |
| 224087_at   | <i>NA</i>       | 3.335 | 2.595 | 2.545 |
| 219162_s_at | <i>MRPL11</i>   | 4.595 | 3.545 | 3.535 |
| 222057_at   | <i>NOL12</i>    | 3.505 | 2.745 | 2.655 |
| 1564066_at  | <i>C6orf137</i> | 6.04  | 4.71  | 4.61  |
| 213946_s_at | <i>OBSL1</i>    | 3.05  | 2.36  | 2.34  |
| 207677_s_at | <i>NCF4</i>     | 3.395 | 2.615 | 2.615 |

|              |                  |        |       |       |
|--------------|------------------|--------|-------|-------|
| 239530_at    | <i>NA</i>        | 3.41   | 2.64  | 2.62  |
| 229381_at    | <i>C1orf64</i>   | 4.03   | 3.11  | 3.11  |
| 222440_s_at  | <i>THRAP3</i>    | 9.515  | 7.235 | 7.445 |
| 1553565_s_at | <i>DDAH1</i>     | 3.225  | 2.485 | 2.485 |
| 1561078_at   | <i>NA</i>        | 2.89   | 2.23  | 2.23  |
| 215125_s_at  | <i>UGT1A1</i>    | 3.32   | 2.57  | 2.56  |
| 1552725_s_at | <i>ADAMTS17</i>  | 2.955  | 2.265 | 2.295 |
| 1561581_at   | <i>NA</i>        | 4.13   | 3.21  | 3.17  |
| 229437_at    | <i>BIC</i>       | 5.71   | 4.38  | 4.45  |
| 220244_at    | <i>LOH3CR2A</i>  | 4.375  | 3.375 | 3.385 |
| 1553828_at   | <i>FAM55A</i>    | 3.1    | 2.4   | 2.4   |
| 200869_at    | <i>RPL18A</i>    | 9.97   | 7.8   | 7.62  |
| 214216_s_at  | <i>LARP5</i>     | 3.195  | 2.465 | 2.485 |
| 220095_at    | <i>C9orf39</i>   | 2.845  | 2.205 | 2.205 |
| 233267_at    | <i>SELENBP1</i>  | 2.745  | 2.125 | 2.125 |
| 222176_at    | <i>PTEN</i>      | 3.115  | 2.415 | 2.415 |
| 206542_s_at  | <i>SMARCA2</i>   | 11.415 | 8.865 | 8.795 |
| 239071_at    | <i>RBBP4</i>     | 6.19   | 4.78  | 4.79  |
| 1561433_at   | <i>LOC285103</i> | 3.945  | 3.015 | 3.085 |
| 224145_s_at  | <i>SPTBN4</i>    | 3.685  | 2.885 | 2.815 |
| 238170_at    | <i>CEP63</i>     | 3.585  | 2.765 | 2.775 |
| 228872_at    | <i>C9orf77</i>   | 3.575  | 2.785 | 2.755 |
| 229831_at    | <i>CNTN3</i>     | 11.79  | 9.12  | 9.13  |
| 228243_at    | <i>PAXIP1</i>    | 3.36   | 2.61  | 2.59  |
| 219442_at    | <i>C16orf67</i>  | 2.85   | 2.21  | 2.21  |
| 206450_at    | <i>DBH</i>       | 3.065  | 2.365 | 2.375 |
| 229047_at    | <i>PLEKHB1</i>   | 5.095  | 3.965 | 3.935 |
| 1556659_at   | <i>NA</i>        | 3.58   | 2.78  | 2.77  |
| 203498_at    | <i>DSCR1L1</i>   | 9.715  | 7.545 | 7.525 |
| 215517_at    | <i>PYGO1</i>     | 3.195  | 2.475 | 2.475 |
| 211904_x_at  | <i>RAD52</i>     | 3.105  | 2.405 | 2.405 |

|              |                  |        |       |       |
|--------------|------------------|--------|-------|-------|
| 1561502_x_at | <i>LOC348180</i> | 3.975  | 3.125 | 3.035 |
| 210075_at    | <i>2-Mar</i>     | 3.38   | 2.63  | 2.61  |
| 211654_x_at  | <i>HLA-DQB1</i>  | 3.005  | 2.325 | 2.325 |
| 228310_at    | <i>ENAH</i>      | 10.34  | 7.89  | 8.15  |
| 215066_at    | <i>PTPRF</i>     | 3.365  | 2.605 | 2.615 |
| 214115_at    | <i>VAMP5</i>     | 8.86   | 6.93  | 6.83  |
| 220057_at    | <i>XAGE1</i>     | 2.915  | 2.265 | 2.255 |
| 228850_s_at  | <i>SLIT2</i>     | 12.11  | 9.45  | 9.37  |
| 239125_at    | <i>NA</i>        | 3.185  | 2.475 | 2.465 |
| 1561863_a_at | <i>CRY1</i>      | 3.67   | 2.87  | 2.83  |
| 222487_s_at  | <i>RPS27L</i>    | 10.575 | 8.195 | 8.235 |
| 222962_s_at  | <i>MCM10</i>     | 3.13   | 2.44  | 2.42  |
| 216391_s_at  | <i>ATXN8OS</i>   | 2.78   | 2.16  | 2.16  |
| 221383_at    | <i>NMUR1</i>     | 3.33   | 2.59  | 2.59  |
| 218808_at    | <i>DALRD3</i>    | 4.68   | 3.7   | 3.58  |
| 216911_s_at  | <i>HIC2</i>      | 3.095  | 2.425 | 2.395 |
| 203604_at    | <i>ZNF516</i>    | 9.28   | 7.32  | 7.12  |
| 1554469_at   | <i>ZBTB44</i>    | 3.95   | 3.07  | 3.07  |
| 234431_at    | <i>NA</i>        | 4.115  | 3.205 | 3.195 |
| 202980_s_at  | <i>SLAH1</i>     | 8.715  | 6.735 | 6.825 |
| 1553055_a_at | <i>SLFN5</i>     | 3.51   | 2.74  | 2.73  |
| 222936_s_at  | <i>C1orf121</i>  | 3.275  | 2.565 | 2.535 |
| 1556757_a_at | <i>ALS2CR11</i>  | 3.675  | 2.865 | 2.845 |
| 1561795_at   | <i>NA</i>        | 3.285  | 2.555 | 2.565 |
| 243716_at    | <i>NA</i>        | 3.35   | 2.62  | 2.6   |
| 240530_at    | <i>SLC25A16</i>  | 3.15   | 2.46  | 2.45  |
| 207300_s_at  | <i>F7</i>        | 6.39   | 5.05  | 4.9   |
| 1566884_at   | <i>C17orf84</i>  | 2.9    | 2.27  | 2.25  |
| 201698_s_at  | <i>SFRS9</i>     | 12.95  | 10    | 10.17 |
| 1556962_at   | <i>ONECUT3</i>   | 4.835  | 3.795 | 3.745 |
| 1557817_a_at | <i>NA</i>        | 6.275  | 4.845 | 4.945 |

|             |                  |        |        |        |
|-------------|------------------|--------|--------|--------|
| 203373_at   | <i>SOCS2</i>     | 12.16  | 9.42   | 9.53   |
| 203973_s_at | <i>CEBPD</i>     | 7.62   | 5.96   | 5.92   |
| 243712_at   | <i>XIST</i>      | 2.63   | 2.05   | 2.05   |
| 229827_at   | <i>BUB3</i>      | 3.54   | 2.76   | 2.76   |
| 216018_at   | <i>RNF5</i>      | 2.675  | 2.105  | 2.075  |
| 240071_at   | <i>NA</i>        | 2.93   | 2.28   | 2.29   |
| 201621_at   | <i>NBL1</i>      | 10.285 | 7.955  | 8.085  |
| 1563283_at  | <i>NA</i>        | 5.21   | 4.07   | 4.06   |
| 1553464_at  | <i>FLJ40288</i>  | 3.57   | 2.83   | 2.75   |
| 211159_s_at | <i>PPP2R5D</i>   | 3.37   | 2.59   | 2.67   |
| 243425_at   | <i>COX4NB</i>    | 3.305  | 2.595  | 2.575  |
| 242609_x_at | <i>ADCK4</i>     | 3.395  | 2.655  | 2.655  |
| 210924_at   | <i>OLFM1</i>     | 3.16   | 2.47   | 2.45   |
| 231197_at   | <i>PPP1R3F</i>   | 3.29   | 2.57   | 2.57   |
| 219618_at   | <i>IRAK4</i>     | 5.3    | 4.07   | 4.21   |
| 220604_x_at | <i>FTCD</i>      | 4.72   | 3.66   | 3.7    |
| 213879_at   | <i>NA</i>        | 13.51  | 10.64  | 10.46  |
| 206788_s_at | <i>CBFB</i>      | 7.315  | 5.755  | 5.665  |
| 230413_s_at | <i>AP1S2</i>     | 12.895 | 10.005 | 10.135 |
| 236611_at   | <i>ZNF232</i>    | 4.135  | 3.195  | 3.275  |
| 231640_at   | <i>LYRM5</i>     | 3.095  | 2.415  | 2.415  |
| 208867_s_at | <i>CSNK1A1</i>   | 8.155  | 6.335  | 6.405  |
| 214398_s_at | <i>IKBKE</i>     | 2.73   | 2.13   | 2.13   |
| 217413_s_at | <i>TNXB</i>      | 2.905  | 2.265  | 2.265  |
| 227236_at   | <i>TSPAN2</i>    | 9.195  | 7.205  | 7.175  |
| 234110_at   | <i>LOC283075</i> | 3.505  | 2.755  | 2.725  |
| 222419_x_at | <i>UBE2H</i>     | 3.065  | 2.415  | 2.385  |
| 233545_at   | <i>INPP5D</i>    | 3.41   | 2.67   | 2.66   |
| 217903_at   | <i>STRN4</i>     | 3.13   | 2.44   | 2.45   |
| 203750_s_at | <i>RARA</i>      | 4.63   | 3.65   | 3.6    |
| 241470_x_at | <i>NA</i>        | 3.94   | 3.09   | 3.07   |

|             |                  |        |        |       |
|-------------|------------------|--------|--------|-------|
| 205597_at   | <i>SLC44A4</i>   | 3.19   | 2.49   | 2.49  |
| 1553858_at  | <i>ZBTB3</i>     | 6.925  | 5.485  | 5.365 |
| 1564603_at  | <i>NUT</i>       | 2.755  | 2.155  | 2.155 |
| 240890_at   | <i>CASP4</i>     | 3.925  | 3.075  | 3.065 |
| 241608_at   | <i>SNTB2</i>     | 3.435  | 2.695  | 2.695 |
| 214101_s_at | <i>LOC728896</i> | 11.45  | 9.04   | 8.89  |
| 202976_s_at | <i>RHOBTB3</i>   | 10.22  | 7.93   | 8.07  |
| 222942_s_at | <i>TIAM2</i>     | 6.16   | 4.84   | 4.8   |
| 223783_s_at | <i>GEMIN4</i>    | 3.215  | 2.525  | 2.515 |
| 1563961_at  | <i>FHAD1</i>     | 3.155  | 2.475  | 2.465 |
| 210799_at   | <i>HTR1B</i>     | 3.075  | 2.415  | 2.415 |
| 239535_at   | <i>POMT2</i>     | 2.9    | 2.28   | 2.28  |
| 234958_at   | <i>PPFIBP2</i>   | 3.45   | 2.71   | 2.71  |
| 207916_at   | <i>RBM</i>       | 3.26   | 2.57   | 2.55  |
| 213722_at   | <i>SOX2</i>      | 2.815  | 2.215  | 2.215 |
| 206582_s_at | <i>GPR56</i>     | 3.08   | 2.41   | 2.42  |
| 223477_s_at | <i>FLJ38663</i>  | 5.3    | 4.1    | 4.22  |
| 214435_x_at | <i>RALA</i>      | 12.705 | 10.045 | 9.885 |
| 220491_at   | <i>HAMP</i>      | 6.11   | 4.83   | 4.76  |
| 237506_at   | <i>TMEM177</i>   | 3.135  | 2.445  | 2.475 |
| 1561497_at  | <i>NA</i>        | 3.565  | 2.815  | 2.795 |
| 233592_at   | <i>ANKRD18B</i>  | 3.015  | 2.375  | 2.365 |
| 232642_at   | <i>LOC90113</i>  | 3.37   | 2.66   | 2.64  |
| 229029_at   | <i>NA</i>        | 2.89   | 2.25   | 2.29  |
| 235387_at   | <i>GSTCD</i>     | 5.355  | 4.225  | 4.195 |
| 243709_at   | <i>FLJ90709</i>  | 3.015  | 2.365  | 2.375 |
| 1556269_at  | <i>MYT1</i>      | 3.58   | 2.86   | 2.77  |
| 242629_at   | <i>RAB3B</i>     | 8.965  | 7.125  | 6.975 |
| 228803_at   | <i>ORMDL1</i>    | 3.2    | 2.53   | 2.51  |
| 225564_at   | <i>SPATA13</i>   | 10.3   | 8.07   | 8.14  |
| 213087_s_at | <i>EEF1D</i>     | 8.64   | 6.7    | 6.9   |

|             |                 |        |       |       |
|-------------|-----------------|--------|-------|-------|
| 206759_at   | <i>FCER2</i>    | 2.885  | 2.295 | 2.235 |
| 239980_at   | <i>C22orf28</i> | 3.465  | 2.735 | 2.715 |
| 239712_at   | <i>C9orf93</i>  | 3.425  | 2.705 | 2.695 |
| 224313_at   | <i>AASDHPPT</i> | 2.785  | 2.185 | 2.185 |
| 1555713_at  | <i>PNKD</i>     | 2.995  | 2.355 | 2.355 |
| 1562029_at  | <i>NA</i>       | 3.14   | 2.48  | 2.48  |
| 241795_at   | <i>RHEB</i>     | 5.485  | 4.335 | 4.315 |
| 201605_x_at | <i>CNN2</i>     | 9.035  | 7.105 | 7.135 |
| 218768_at   | <i>NUP107</i>   | 10.85  | 8.56  | 8.54  |
| 212044_s_at | <i>RPL27A</i>   | 15.12  | 11.87 | 11.96 |
| 223577_x_at | <i>MALAT1</i>   | 13.15  | 10.3  | 10.44 |
| 231081_at   | <i>FLJ40298</i> | 3.2    | 2.54  | 2.5   |
| 202881_x_at | <i>NOL7</i>     | 3.02   | 2.39  | 2.38  |
| 234225_at   | <i>NA</i>       | 3.41   | 2.68  | 2.7   |
| 214953_s_at | <i>APP</i>      | 12.42  | 9.74  | 9.86  |
| 240849_at   | <i>FZRI</i>     | 4.785  | 3.745 | 3.815 |
| 234855_at   | <i>ORF1</i>     | 3.92   | 3.14  | 3.05  |
| 236379_at   | <i>EPB41</i>    | 3.105  | 2.445 | 2.455 |
| 33736_at    | <i>STOML1</i>   | 8.375  | 6.695 | 6.535 |
| 1560131_at  | <i>NA</i>       | 2.825  | 2.235 | 2.225 |
| 230170_at   | <i>OSM</i>      | 3.145  | 2.485 | 2.485 |
| 207138_at   | <i>PHF2</i>     | 3.53   | 2.79  | 2.79  |
| 202022_at   | <i>ALDOC</i>    | 5.435  | 4.235 | 4.345 |
| 207569_at   | <i>ROSI</i>     | 3.455  | 2.735 | 2.725 |
| 241445_at   | <i>TMEM87B</i>  | 4.795  | 3.785 | 3.795 |
| 212257_s_at | <i>SMARCA2</i>  | 2.785  | 2.195 | 2.205 |
| 229242_at   | <i>NA</i>       | 2.67   | 2.11  | 2.11  |
| 224977_at   | <i>C6orf89</i>  | 9.835  | 7.765 | 7.775 |
| 219632_s_at | <i>TRPV1</i>    | 2.895  | 2.295 | 2.295 |
| 223493_at   | <i>FBXO4</i>    | 7.15   | 5.6   | 5.7   |
| 201406_at   | <i>RPL36A</i>   | 11.225 | 8.925 | 8.815 |

|              |                   |        |       |       |
|--------------|-------------------|--------|-------|-------|
| 222022_at    | <i>DTX3</i>       | 3.195  | 2.535 | 2.525 |
| 233278_at    | <i>M-RIP</i>      | 3.095  | 2.445 | 2.455 |
| 240840_s_at  | <i>C5orf35</i>    | 3.315  | 2.625 | 2.615 |
| 237713_at    | <i>TACC2</i>      | 3.24   | 2.56  | 2.57  |
| 223541_at    | <i>HAS3</i>       | 3.235  | 2.545 | 2.565 |
| 227298_at    | <i>FLJ37798</i>   | 8.02   | 6.32  | 6.36  |
| 206590_x_at  | <i>DRD2</i>       | 2.595  | 2.055 | 2.055 |
| 201867_s_at  | <i>TBL1X</i>      | 5.975  | 4.685 | 4.785 |
| 237790_at    | <i>FLJ33996</i>   | 3.27   | 2.58  | 2.6   |
| 223726_at    | <i>KCNH3</i>      | 3.18   | 2.52  | 2.52  |
| 238297_at    | <i>PHACTR1</i>    | 3.965  | 3.175 | 3.105 |
| 1555437_at   | <i>EARS2</i>      | 3.83   | 3.03  | 3.03  |
| 221463_at    | <i>CCL24</i>      | 2.935  | 2.325 | 2.315 |
| 235966_at    | <i>DAB2IP</i>     | 5.48   | 4.33  | 4.35  |
| 238918_at    | <i>NA</i>         | 2.845  | 2.245 | 2.245 |
| 226880_at    | <i>NUCKS1</i>     | 14.68  | 11.59 | 11.66 |
| 224800_at    | <i>WDFY1</i>      | 11.535 | 9.055 | 9.215 |
| 219271_at    | <i>GALNT14</i>    | 2.8    | 2.22  | 2.22  |
| 37005_at     | <i>NBL1</i>       | 11.85  | 9.41  | 9.36  |
| 228399_at    | <i>OSR1</i>       | 3.385  | 2.665 | 2.705 |
| 1552491_at   | <i>IDI2</i>       | 3.045  | 2.405 | 2.415 |
| 238816_at    | <i>NA</i>         | 3.38   | 2.68  | 2.68  |
| 1565843_s_at | <i>BRPF3</i>      | 3.405  | 2.705 | 2.695 |
| 220519_s_at  | <i>LIM2</i>       | 2.8    | 2.22  | 2.22  |
| 240494_at    | <i>CTDSPL</i>     | 3.355  | 2.685 | 2.635 |
| 236643_s_at  | <i>LOC645321</i>  | 4.025  | 3.225 | 3.155 |
| 233941_at    | <i>C14orf166B</i> | 3.205  | 2.545 | 2.545 |
| 1565823_at   | <i>7-Sep</i>      | 11.205 | 9.005 | 8.775 |
| 203485_at    | <i>RTNI</i>       | 3.445  | 2.725 | 2.735 |
| 210300_at    | <i>REMI</i>       | 4.325  | 3.405 | 3.455 |
| 214072_x_at  | <i>NENF</i>       | 5.79   | 4.6   | 4.59  |



|              |                  |       |       |       |
|--------------|------------------|-------|-------|-------|
| 1553713_a_at | <i>RHEBL1</i>    | 4.855 | 3.885 | 3.815 |
| 237310_at    | <i>EXT1</i>      | 7.125 | 5.655 | 5.645 |
| 229648_at    | <i>NA</i>        | 6.725 | 5.405 | 5.285 |
| 220725_x_at  | <i>DNAH3</i>     | 5.955 | 4.765 | 4.695 |
| 244643_at    | <i>NA</i>        | 2.75  | 2.19  | 2.19  |
| 1556014_at   | <i>MESP2</i>     | 2.845 | 2.265 | 2.255 |
| 242636_at    | <i>GCRG224</i>   | 2.94  | 2.34  | 2.34  |
| 244045_at    | <i>NA</i>        | 3.37  | 2.68  | 2.67  |
| 244865_at    | <i>HAX1</i>      | 3.88  | 3.06  | 3.11  |
| 218361_at    | <i>GOLPH3L</i>   | 8.69  | 6.98  | 6.84  |
| 229621_x_at  | <i>EBF3</i>      | 3.79  | 3.02  | 3.01  |
| 1566830_at   | <i>LOC283104</i> | 2.595 | 2.055 | 2.055 |
| 242239_at    | <i>NSUN6</i>     | 7.235 | 5.775 | 5.725 |
| 222036_s_at  | <i>MCM4</i>      | 8.97  | 7.13  | 7.13  |
| 224467_s_at  | <i>PDCD2L</i>    | 3.25  | 2.59  | 2.58  |
| 235433_at    | <i>APOOL</i>     | 9.455 | 7.425 | 7.615 |
| 1554743_x_at | <i>PMS1</i>      | 2.955 | 2.335 | 2.375 |
| 206125_s_at  | <i>KLK8</i>      | 3.14  | 2.52  | 2.47  |
| 234654_at    | <i>C20orf4</i>   | 3.62  | 2.88  | 2.88  |
| 233454_at    | <i>C4orf15</i>   | 4.295 | 3.425 | 3.405 |
| 239674_at    | <i>ARID1B</i>    | 3.375 | 2.725 | 2.655 |
| 228188_at    | <i>FOSL2</i>     | 10.77 | 8.58  | 8.57  |
| 217406_at    | <i>NA</i>        | 3.685 | 2.945 | 2.915 |
| 211650_x_at  | <i>IL8</i>       | 2.755 | 2.195 | 2.195 |
| 227552_at    | <i>1-Sep</i>     | 3.115 | 2.495 | 2.455 |
| 206800_at    | <i>MTHFR</i>     | 3.16  | 2.52  | 2.52  |
| 206216_at    | <i>SRPK3</i>     | 3.135 | 2.505 | 2.485 |
| 201766_at    | <i>ELAC2</i>     | 5.1   | 4.02  | 4.1   |
| 205757_at    | <i>ENTPD5</i>    | 3.34  | 2.66  | 2.66  |
| 229401_at    | <i>IL17RE</i>    | 3.44  | 2.75  | 2.73  |
| 228594_at    | <i>C5orf33</i>   | 10.42 | 8.18  | 8.42  |

|              |                 |       |       |       |
|--------------|-----------------|-------|-------|-------|
| 236030_at    | <i>RCOR2</i>    | 3.185 | 2.545 | 2.535 |
| 232754_at    | <i>CENPO</i>    | 3.515 | 2.815 | 2.785 |
| 231720_s_at  | <i>JAM3</i>     | 2.685 | 2.145 | 2.135 |
| 216103_at    | <i>ACOT11</i>   | 4.105 | 3.305 | 3.235 |
| 217462_at    | <i>C11orf9</i>  | 3.765 | 3.025 | 2.985 |
| 244729_at    | <i>NA</i>       | 3.515 | 2.815 | 2.785 |
| 1554895_a_at | <i>RHBDL2</i>   | 3.18  | 2.55  | 2.53  |
| 222328_x_at  | <i>MEG3</i>     | 3.03  | 2.39  | 2.43  |
| 1563108_at   | <i>LRRC62</i>   | 3.225 | 2.575 | 2.565 |
| 217579_x_at  | <i>ARL6IP2</i>  | 4.65  | 3.69  | 3.73  |
| 219038_at    | <i>MORC4</i>    | 9.4   | 7.49  | 7.51  |
| 213409_s_at  | <i>RHEB</i>     | 7.595 | 5.975 | 6.145 |
| 217541_x_at  | <i>ZNF816A</i>  | 3.545 | 2.855 | 2.795 |
| 205616_at    | <i>NA</i>       | 3.345 | 2.685 | 2.655 |
| 208770_s_at  | <i>EIF4EBP2</i> | 9.51  | 7.48  | 7.7   |
| 241181_x_at  | <i>NA</i>       | 5.015 | 4.025 | 3.975 |
| 227797_x_at  | <i>LYRM2</i>    | 5.25  | 4.18  | 4.2   |
| 234344_at    | <i>RAP2C</i>    | 5.05  | 4.03  | 4.04  |
| 239965_at    | <i>MAG11</i>    | 3.665 | 2.895 | 2.965 |
| 221373_x_at  | <i>PSPN</i>     | 2.9   | 2.32  | 2.32  |
| 216679_at    | <i>NA</i>       | 3.17  | 2.53  | 2.53  |
| 215402_at    | <i>APPBP2</i>   | 3.68  | 2.94  | 2.94  |
| 205028_at    | <i>TRO</i>      | 4.48  | 3.58  | 3.58  |
| 213789_at    | <i>TBC1D25</i>  | 10.35 | 8.23  | 8.31  |
| 215281_x_at  | <i>POGZ</i>     | 4.68  | 3.77  | 3.71  |
| 243078_at    | <i>NA</i>       | 2.99  | 2.39  | 2.39  |
| 1553359_at   | <i>FBXL18</i>   | 2.71  | 2.15  | 2.18  |
| 222374_at    | <i>BTRC</i>     | 3.305 | 2.645 | 2.645 |
| 210431_at    | <i>ALPPL2</i>   | 2.825 | 2.265 | 2.255 |
| 216417_x_at  | <i>HOXB9</i>    | 3.725 | 2.975 | 2.985 |
| 215799_at    | <i>NA</i>       | 2.89  | 2.31  | 2.31  |

|              |                  |        |        |        |
|--------------|------------------|--------|--------|--------|
| 1563549_a_at | <i>TMEM16H</i>   | 3.51   | 2.83   | 2.79   |
| 214091_s_at  | <i>GPX3</i>      | 3.58   | 2.9    | 2.82   |
| 207101_at    | <i>VAMP1</i>     | 3.69   | 2.95   | 2.95   |
| 223663_at    | <i>CCDC88</i>    | 2.365  | 1.885  | 1.885  |
| 1554705_at   | <i>SCARA5</i>    | 3.42   | 2.74   | 2.74   |
| 229329_s_at  | <i>SSU72</i>     | 8.675  | 6.945  | 6.935  |
| 1557174_a_at | <i>IRAK1BP1</i>  | 4.02   | 3.22   | 3.22   |
| 1561181_at   | <i>ARID5B</i>    | 2.825  | 2.235  | 2.295  |
| 242495_at    | <i>SERF1A</i>    | 3.92   | 3.17   | 3.11   |
| 1555158_at   | <i>NA</i>        | 2.705  | 2.165  | 2.165  |
| 1560800_at   | <i>NA</i>        | 3.765  | 3.045  | 2.995  |
| 217248_s_at  | <i>SLC7A8</i>    | 2.675  | 2.135  | 2.145  |
| 214549_x_at  | <i>SPRR1A</i>    | 4.33   | 3.47   | 3.47   |
| 236042_at    | <i>RAD52</i>     | 3.175  | 2.555  | 2.525  |
| 224445_s_at  | <i>ZFYVE21</i>   | 11.005 | 8.905  | 8.735  |
| 214821_at    | <i>SLC25A4</i>   | 2.73   | 2.19   | 2.19   |
| 1553582_a_at | <i>SPAG11</i>    | 3.52   | 2.84   | 2.81   |
| 203484_at    | <i>SEC61G</i>    | 13.535 | 10.825 | 10.885 |
| 1555923_a_at | <i>C10orf114</i> | 3.63   | 2.94   | 2.88   |
| 230666_at    | <i>HOXA11S</i>   | 3.765  | 3.015  | 3.035  |
| 201442_s_at  | <i>ATP6AP2</i>   | 2.92   | 2.34   | 2.35   |
| 1557755_at   | <i>C14orf145</i> | 3.605  | 2.895  | 2.885  |
| 202975_s_at  | <i>RHOBTB3</i>   | 9.1    | 7.39   | 7.21   |
| 233747_at    | <i>NA</i>        | 3.21   | 2.59   | 2.56   |
| 239933_x_at  | <i>C14orf45</i>  | 3.315  | 2.655  | 2.655  |
| 231534_at    | <i>CDC2</i>      | 3.02   | 2.43   | 2.41   |
| 226374_at    | <i>CXADR</i>     | 3.15   | 2.53   | 2.53   |
| 1559467_at   | <i>MTHFS</i>     | 5.88   | 4.77   | 4.67   |
| 229094_at    | <i>LOC401431</i> | 2.93   | 2.35   | 2.35   |
| 225796_at    | <i>PXK</i>       | 10.77  | 8.72   | 8.57   |
| 1554212_s_at | <i>KCNS2</i>     | 7.375  | 5.975  | 5.855  |

|              |                  |        |       |       |
|--------------|------------------|--------|-------|-------|
| 231400_s_at  | <i>NA</i>        | 2.655  | 2.135 | 2.135 |
| 219004_s_at  | <i>C21orf45</i>  | 7.31   | 5.85  | 5.89  |
| 1557303_at   | <i>NT5C</i>      | 2.675  | 2.145 | 2.155 |
| 215378_at    | <i>SRA1</i>      | 4.06   | 3.27  | 3.25  |
| 230564_at    | <i>SIPAIL3</i>   | 2.505  | 2.005 | 2.005 |
| 1563341_at   | <i>KIF3A</i>     | 3.47   | 2.79  | 2.79  |
| 211366_x_at  | <i>CASP1</i>     | 2.915  | 2.345 | 2.335 |
| 217904_s_at  | <i>BACE1</i>     | 10.765 | 8.565 | 8.735 |
| 205194_at    | <i>PSPH</i>      | 8.525  | 6.755 | 6.945 |
| 216537_s_at  | <i>SIGLEC7</i>   | 3.085  | 2.485 | 2.475 |
| 1564257_at   | <i>STAMBPL1</i>  | 5.165  | 4.175 | 4.125 |
| 229120_s_at  | <i>CDC42SE1</i>  | 11.63  | 9.23  | 9.47  |
| 1559766_at   | <i>NA</i>        | 2.795  | 2.255 | 2.245 |
| 1559534_at   | <i>NA</i>        | 4.32   | 3.52  | 3.44  |
| 1567068_at   | <i>OR4D1</i>     | 3.38   | 2.73  | 2.71  |
| 243029_at    | <i>KREMEN1</i>   | 3.595  | 2.905 | 2.875 |
| 236571_at    | <i>SLC2A3</i>    | 3.58   | 2.88  | 2.88  |
| 240584_at    | <i>SHANK2</i>    | 3.165  | 2.545 | 2.545 |
| 238636_at    | <i>NA</i>        | 4.84   | 3.9   | 3.9   |
| 205506_at    | <i>VIL1</i>      | 3.095  | 2.495 | 2.485 |
| 238405_at    | <i>GAB2</i>      | 3.88   | 3.15  | 3.1   |
| 233064_at    | <i>LOC388494</i> | 3.265  | 2.625 | 2.625 |
| 1554662_at   | <i>C17orf47</i>  | 2.78   | 2.24  | 2.24  |
| 204984_at    | <i>GPC4</i>      | 12.35  | 9.93  | 9.97  |
| 1562271_x_at | <i>ARHGEF7</i>   | 3.945  | 3.205 | 3.155 |
| 1557066_at   | <i>LUC7L</i>     | 4.595  | 3.705 | 3.695 |
| 219990_at    | <i>E2F8</i>      | 3.445  | 2.795 | 2.765 |
| 242485_at    | <i>PTK2</i>      | 3.8    | 3.08  | 3.05  |
| 228197_at    | <i>C1orf86</i>   | 2.86   | 2.3   | 2.3   |
| 237851_at    | <i>NIBP</i>      | 3.83   | 3.13  | 3.05  |
| 238858_at    | <i>TIFA</i>      | 2.79   | 2.25  | 2.25  |

|              |                  |        |       |       |
|--------------|------------------|--------|-------|-------|
| 211579_at    | <i>ITGB3</i>     | 4.66   | 3.78  | 3.74  |
| 242368_at    | <i>GTF2I</i>     | 3.235  | 2.595 | 2.625 |
| 232820_s_at  | <i>FAM112A</i>   | 4.505  | 3.685 | 3.575 |
| 213479_at    | <i>NPTX2</i>     | 3.23   | 2.61  | 2.6   |
| 1564444_at   | <i>SLC24A3</i>   | 3.4    | 2.75  | 2.73  |
| 203166_at    | <i>CFDP1</i>     | 10.095 | 8.235 | 8.045 |
| 217683_at    | <i>HBG2</i>      | 2.935  | 2.365 | 2.375 |
| 215582_x_at  | <i>MCM3AP</i>    | 6.145  | 4.905 | 5.015 |
| 230313_at    | <i>TK2</i>       | 11.135 | 9.125 | 8.865 |
| 1555784_s_at | <i>IRAK1</i>     | 2.835  | 2.305 | 2.285 |
| 205500_at    | <i>C5</i>        | 4.905  | 3.995 | 3.935 |
| 1569230_at   | <i>TATDN1</i>    | 3.43   | 2.8   | 2.74  |
| 207151_at    | <i>ADCYAP1R1</i> | 3.44   | 2.77  | 2.79  |
| 216464_x_at  | <i>GPR44</i>     | 2.71   | 2.19  | 2.19  |
| 217258_x_at  | <i>IVD</i>       | 3.455  | 2.795 | 2.795 |
| 218221_at    | <i>ARNT</i>      | 9.07   | 7.25  | 7.41  |
| 244394_at    | <i>BLK</i>       | 2.8    | 2.26  | 2.26  |
| 1566256_s_at | <i>GPR180</i>    | 3.34   | 2.7   | 2.7   |
| 235875_at    | <i>SLC1A4</i>    | 3.525  | 2.845 | 2.845 |
| 1553878_at   | <i>GOTIL1</i>    | 3.57   | 2.89  | 2.88  |
| 243553_x_at  | <i>LOC643749</i> | 3.31   | 2.71  | 2.63  |
| 243766_s_at  | <i>TEAD2</i>     | 4.335  | 3.505 | 3.495 |
| 207369_at    | <i>NA</i>        | 3.135  | 2.535 | 2.535 |
| 236947_at    | <i>SEMA3C</i>    | 3.155  | 2.565 | 2.535 |
| 234199_at    | <i>SLC24A3</i>   | 2.62   | 2.12  | 2.12  |
| 229547_s_at  | <i>WNK2</i>      | 4.325  | 3.525 | 3.475 |
| 228884_at    | <i>LRRC27</i>    | 3.335  | 2.705 | 2.685 |
| 1569461_at   | <i>KCNT1</i>     | 4.01   | 3.28  | 3.21  |
| 242668_x_at  | <i>SPAG4L</i>    | 2.905  | 2.355 | 2.345 |
| 208454_s_at  | <i>PGCP</i>      | 7.775  | 6.265 | 6.315 |
| 241114_s_at  | <i>NA</i>        | 6.09   | 4.98  | 4.88  |

|              |                    |        |        |        |
|--------------|--------------------|--------|--------|--------|
| 217432_s_at  | <i>IDS</i>         | 3.03   | 2.46   | 2.44   |
| 216081_at    | <i>LAMA4</i>       | 3.245  | 2.635  | 2.615  |
| 1555756_a_at | <i>CLEC7A</i>      | 3.28   | 2.66   | 2.65   |
| 243101_x_at  | <i>C20orf160</i>   | 3.425  | 2.765  | 2.765  |
| 1558142_at   | <i>TNRC6B</i>      | 11.77  | 9.52   | 9.54   |
| 243459_x_at  | <i>PFTK1</i>       | 7.105  | 5.695  | 5.795  |
| 236338_at    | <i>IRS2</i>        | 4.485  | 3.625  | 3.625  |
| 231950_at    | <i>ZNF658</i>      | 3.605  | 2.925  | 2.915  |
| 208425_s_at  | <i>TANC2</i>       | 3.55   | 2.88   | 2.87   |
| 220521_s_at  | <i>ATG16L1</i>     | 3.49   | 2.8    | 2.85   |
| 208108_s_at  | <i>AVPR2</i>       | 2.63   | 2.13   | 2.13   |
| 206618_at    | <i>IL18R1</i>      | 3.03   | 2.47   | 2.43   |
| 240606_at    | <i>ACACA</i>       | 3.76   | 3.06   | 3.02   |
| 1554004_a_at | <i>RGNEF</i>       | 3.175  | 2.575  | 2.565  |
| 1556111_s_at | <i>NA</i>          | 4.12   | 3.35   | 3.33   |
| 238663_x_at  | <i>GRIA4</i>       | 3.33   | 2.7    | 2.68   |
| 239116_at    | <i>ANKRD10</i>     | 3.325  | 2.695  | 2.685  |
| 215733_x_at  | <i>CTAG2</i>       | 2.42   | 1.96   | 1.96   |
| 216254_at    | <i>PARVB</i>       | 3.765  | 3.065  | 3.035  |
| 202938_x_at  | <i>CTA-126B4.3</i> | 2.72   | 2.2    | 2.2    |
| 1559611_at   | <i>TMEM75</i>      | 2.95   | 2.39   | 2.39   |
| 202028_s_at  | <i>RPL38</i>       | 14.575 | 11.855 | 11.775 |
| 1564905_at   | <i>NA</i>          | 3.3    | 2.7    | 2.66   |
| 229304_s_at  | <i>MLFIIP</i>      | 3.05   | 2.46   | 2.48   |
| 205011_at    | <i>LOH11CR2A</i>   | 2.73   | 2.21   | 2.21   |
| 229465_s_at  | <i>PTPRS</i>       | 11.73  | 9.47   | 9.54   |
| 235144_at    | <i>NA</i>          | 4.03   | 3.26   | 3.27   |
| 212953_x_at  | <i>CALR</i>        | 8.185  | 6.595  | 6.665  |
| 1552671_a_at | <i>SLC9A7</i>      | 3.49   | 2.83   | 2.83   |
| 1557129_a_at | <i>FAM111B</i>     | 3.99   | 3.26   | 3.21   |
| 214523_at    | <i>CEBPE</i>       | 3.8    | 3.12   | 3.04   |

|             |                  |        |       |       |
|-------------|------------------|--------|-------|-------|
| 215153_at   | <i>NOS1AP</i>    | 3.135  | 2.545 | 2.535 |
| 227225_at   | <i>ZNF503</i>    | 4.305  | 3.485 | 3.485 |
| 228182_at   | <i>ADCY5</i>     | 2.65   | 2.15  | 2.15  |
| 1563009_at  | <i>LOC284930</i> | 2.96   | 2.41  | 2.4   |
| 234117_at   | <i>AAA1</i>      | 3.29   | 2.68  | 2.66  |
| 209184_s_at | <i>IRS2</i>      | 9.795  | 7.865 | 8.045 |
| 244548_at   | <i>ARHGAP26</i>  | 3.265  | 2.645 | 2.645 |
| 210673_x_at | <i>TITF1</i>     | 4.68   | 3.8   | 3.79  |
| 239943_x_at | <i>PIGL</i>      | 3.83   | 3.12  | 3.1   |
| 222882_s_at | <i>CI7orf59</i>  | 2.915  | 2.385 | 2.355 |
| 1562428_at  | <i>LOC654780</i> | 4.375  | 3.535 | 3.565 |
| 208321_s_at | <i>CABP1</i>     | 3      | 2.44  | 2.43  |
| 231278_at   | <i>NA</i>        | 3.445  | 2.825 | 2.775 |
| 1560443_at  | <i>SMCHD1</i>    | 4.175  | 3.385 | 3.395 |
| 215089_s_at | <i>RBM10</i>     | 8.5    | 6.97  | 6.83  |
| 224182_x_at | <i>SEMA6B</i>    | 2.76   | 2.24  | 2.24  |
| 1556494_at  | <i>NA</i>        | 3.455  | 2.805 | 2.815 |
| 214773_x_at | <i>TIPRL</i>     | 10.35  | 8.32  | 8.5   |
| 214662_at   | <i>WDR43</i>     | 9.245  | 7.405 | 7.605 |
| 213176_s_at | <i>LTBP4</i>     | 4.445  | 3.605 | 3.605 |
| 210073_at   | <i>ST8SIA1</i>   | 3.815  | 3.135 | 3.065 |
| 1552646_at  | <i>IL11RA</i>    | 3.495  | 2.855 | 2.825 |
| 228405_at   | <i>RHPN1</i>     | 5.14   | 4.18  | 4.17  |
| 235941_s_at | <i>LOC401629</i> | 3.195  | 2.595 | 2.595 |
| 212414_s_at | <i>6-Sep</i>     | 10.625 | 8.655 | 8.605 |
| 1556606_at  | <i>NAV2</i>      | 2.68   | 2.18  | 2.17  |
| 205481_at   | <i>ADORA1</i>    | 3.19   | 2.59  | 2.59  |
| 219076_s_at | <i>PXMP2</i>     | 7.89   | 6.5   | 6.33  |
| 208199_s_at | <i>ZFP161</i>    | 3.63   | 2.96  | 2.94  |
| 211577_s_at | <i>IGF1</i>      | 3.19   | 2.6   | 2.58  |
| 224965_at   | <i>GNG2</i>      | 3.52   | 2.86  | 2.86  |

|             |                  |       |       |       |
|-------------|------------------|-------|-------|-------|
| 227681_at   | <i>ZFP36L2</i>   | 3.135 | 2.555 | 2.555 |
| 224509_s at | <i>RTN4IP1</i>   | 6.665 | 5.475 | 5.365 |
| 240508_at   | <i>LOC400927</i> | 2.635 | 2.135 | 2.135 |
| 209819_at   | <i>HABP4</i>     | 3.475 | 2.865 | 2.795 |
| 223411_at   | <i>MIF4GD</i>    | 7.39  | 5.95  | 6.07  |
| 244149_at   | <i>MYL9</i>      | 2.715 | 2.205 | 2.215 |
| 238124_at   | <i>MYOM3</i>     | 3.65  | 3.01  | 2.93  |
| 203811_s at | <i>DNAJB4</i>    | 6.41  | 5.14  | 5.28  |
| 207303_at   | <i>PDE1C</i>     | 2.865 | 2.325 | 2.335 |
| 1560296_at  | <i>DST</i>       | 5.025 | 4.105 | 4.065 |
| 229837_s at | <i>KCTD5</i>     | 2.865 | 2.335 | 2.325 |
| 213390_at   | <i>C19orf7</i>   | 11.82 | 9.62  | 9.62  |
| 210228_at   | <i>CSF2</i>      | 3.78  | 3.08  | 3.08  |
| 216866_s at | <i>COL14A1</i>   | 2.84  | 2.32  | 2.31  |
| 220574_at   | <i>SEMA6D</i>    | 2.9   | 2.38  | 2.34  |
| 219201_s at | <i>TWSG1</i>     | 9.77  | 8.02  | 7.89  |
| 213302_at   | <i>PFAS</i>      | 7.03  | 5.7   | 5.76  |
| 204808_s at | <i>TMEM5</i>     | 10.8  | 8.81  | 8.79  |
| 241871_at   | <i>CAMK4</i>     | 3.645 | 2.965 | 2.965 |
| 220410_s at | <i>CAMSAP1</i>   | 3.02  | 2.46  | 2.46  |
| 234867_at   | <i>NA</i>        | 3.275 | 2.675 | 2.665 |
| 216936_at   | <i>NA</i>        | 3.165 | 2.595 | 2.575 |
| 240344_x at | <i>LYRM7</i>     | 9.92  | 8.12  | 8.05  |
| 242185_at   | <i>SFRS12</i>    | 2.995 | 2.445 | 2.435 |
| 214456_x at | <i>SAA2</i>      | 3.305 | 2.685 | 2.695 |
| 208070_s at | <i>REV3L</i>     | 11.46 | 9.32  | 9.36  |
| 206362_x at | <i>MAP3K10</i>   | 4.2   | 3.43  | 3.41  |
| 234729_at   | <i>SUMF2</i>     | 3.02  | 2.46  | 2.46  |
| 1557564_at  | <i>ALKBH3</i>    | 3.185 | 2.605 | 2.595 |
| 208047_s at | <i>NAB1</i>      | 4.155 | 3.345 | 3.435 |
| 1569891_at  | <i>ATP5A1</i>    | 3.095 | 2.525 | 2.515 |



|              |                  |       |       |       |
|--------------|------------------|-------|-------|-------|
| 238173_at    | <i>TCEA2</i>     | 2.93  | 2.39  | 2.39  |
| 231838_at    | <i>C20orf119</i> | 3.655 | 2.975 | 2.975 |
| 220684_at    | <i>TBX21</i>     | 2.885 | 2.355 | 2.345 |
| 1560062_at   | <i>SLC29A2</i>   | 3.225 | 2.645 | 2.605 |
| 225333_at    | <i>ZNF496</i>    | 2.75  | 2.25  | 2.24  |
| 237913_at    | <i>NA</i>        | 3.945 | 3.215 | 3.225 |
| 205275_at    | <i>GTPBP1</i>    | 3.715 | 3.045 | 3.025 |
| 215077_at    | <i>COL3A1</i>    | 3.335 | 2.745 | 2.695 |
| 216563_at    | <i>ANKRD12</i>   | 8.24  | 6.79  | 6.65  |
| 1552325_at   | <i>CCDC11</i>    | 4.31  | 3.56  | 3.47  |
| 242036_x_at  | <i>ATP2B3</i>    | 3.35  | 2.76  | 2.7   |
| 217454_at    | <i>LOC203510</i> | 3.815 | 3.135 | 3.095 |
| 224538_s_at  | <i>PARD6G</i>    | 3.135 | 2.545 | 2.565 |
| 241177_at    | <i>NA</i>        | 3.605 | 2.945 | 2.945 |
| 225686_at    | <i>FAM33A</i>    | 8.895 | 7.325 | 7.195 |
| 1558942_at   | <i>ZNF813</i>    | 9.645 | 7.975 | 7.765 |
| 1556304_s_at | <i>NA</i>        | 3.6   | 2.95  | 2.93  |
| 223311_s_at  | <i>MTA3</i>      | 6.405 | 5.265 | 5.195 |
| 1555902_at   | <i>ARMCX5</i>    | 2.72  | 2.22  | 2.22  |
| 1568964_x_at | <i>SPN</i>       | 4.9   | 4.02  | 3.98  |
| 1563300_at   | <i>LOC387826</i> | 2.71  | 2.21  | 2.22  |
| 222462_s_at  | <i>BACE1</i>     | 10.37 | 8.37  | 8.57  |
| 1562314_at   | <i>NCOA1</i>     | 3.57  | 2.94  | 2.89  |
| 1554014_at   | <i>CHD2</i>      | 6.97  | 5.7   | 5.69  |
| 1564438_at   | <i>LOC729436</i> | 3.415 | 2.795 | 2.795 |
| 203428_s_at  | <i>ASF1A</i>     | 7.805 | 6.425 | 6.335 |
| 221071_at    | <i>NA</i>        | 3.235 | 2.655 | 2.625 |
| 208167_s_at  | <i>MMP16</i>     | 3.465 | 2.825 | 2.835 |
| 240350_at    | <i>NA</i>        | 3.535 | 2.905 | 2.885 |
| 1559083_x_at | <i>LOC284600</i> | 3.215 | 2.645 | 2.615 |
| 218379_at    | <i>RBM7</i>      | 11.28 | 9.19  | 9.25  |

|              |                  |        |       |       |
|--------------|------------------|--------|-------|-------|
| 243849_at    | <i>TMEM37</i>    | 5.07   | 4.15  | 4.14  |
| 207582_at    | <i>PINIL</i>     | 3.005  | 2.465 | 2.455 |
| 223425_at    | <i>RAVER1</i>    | 2.94   | 2.4   | 2.41  |
| 244824_at    | <i>NA</i>        | 3.18   | 2.61  | 2.59  |
| 221709_s_at  | <i>C14orf131</i> | 6.745  | 5.545 | 5.475 |
| 1567623_at   | <i>ABLIM2</i>    | 2.865  | 2.345 | 2.345 |
| 201308_s_at  | <i>11-Sep</i>    | 10.155 | 8.215 | 8.385 |
| 1568702_a_at | <i>WDR71</i>     | 3.19   | 2.6   | 2.61  |
| 1566896_at   | <i>UNQ1887</i>   | 3.225  | 2.645 | 2.635 |
| 236504_x_at  | <i>C6orf52</i>   | 3.315  | 2.725 | 2.705 |
| 1569857_s_at | <i>TPP2</i>      | 3.815  | 3.135 | 3.095 |
| 242658_at    | <i>RAB11FIP3</i> | 3.74   | 3.02  | 3.1   |
| 236222_at    | <i>C3orf15</i>   | 2.86   | 2.35  | 2.33  |
| 234025_at    | <i>NA</i>        | 2.86   | 2.34  | 2.34  |
| 1554967_at   | <i>DIP2A</i>     | 2.72   | 2.22  | 2.23  |
| 34846_at     | <i>CAMK2B</i>    | 2.66   | 2.18  | 2.17  |
| 222731_at    | <i>ZDHHC2</i>    | 11.09  | 9.02  | 9.13  |
| 1558875_at   | <i>SREBF1</i>    | 3.21   | 2.63  | 2.62  |
| 205754_at    | <i>F2</i>        | 2.665  | 2.185 | 2.185 |
| 1566670_at   | <i>C21orf124</i> | 3.135  | 2.565 | 2.575 |
| 244858_at    | <i>TGIF1</i>     | 3.07   | 2.52  | 2.51  |
| 1552887_at   | <i>C10orf27</i>  | 3.445  | 2.835 | 2.805 |
| 221662_s_at  | <i>SLC22A7</i>   | 3.125  | 2.555 | 2.565 |
| 220892_s_at  | <i>PSAT1</i>     | 3.72   | 3.03  | 3.05  |
| 236720_at    | <i>NA</i>        | 2.965  | 2.435 | 2.425 |
| 242740_at    | <i>NA</i>        | 3.61   | 2.95  | 2.96  |
| 215746_at    | <i>NOL14</i>     | 3.155  | 2.585 | 2.575 |
| 225684_at    | <i>FAM33A</i>    | 12.49  | 10.34 | 10.11 |
| 212650_at    | <i>EHBP1</i>     | 7.675  | 6.285 | 6.295 |
| 234464_s_at  | <i>EME1</i>      | 9.155  | 7.545 | 7.455 |
| 202425_x_at  | <i>PPP3CA</i>    | 11.005 | 9.085 | 8.955 |

|              |                 |       |       |       |
|--------------|-----------------|-------|-------|-------|
| 244229_at    | <i>PARVG</i>    | 3.21  | 2.64  | 2.62  |
| 1569341_at   | <i>POLH</i>     | 4.1   | 3.37  | 3.35  |
| 243951_at    | <i>ABCBI</i>    | 3.79  | 3.13  | 3.09  |
| 231710_at    | <i>CAPS</i>     | 3.08  | 2.51  | 2.53  |
| 221408_x_at  | <i>PCDHB12</i>  | 3.85  | 3.15  | 3.15  |
| 228203_at    | <i>B3GNT1</i>   | 3.19  | 2.64  | 2.59  |
| 1553726_s_at | <i>C6orf170</i> | 3.715 | 3.035 | 3.065 |
| 201137_s_at  | <i>HLA-DPB1</i> | 5.865 | 4.815 | 4.805 |
| 239718_at    | <i>NA</i>       | 2.59  | 2.13  | 2.13  |
| 244495_x_at  | <i>C18orf45</i> | 7.81  | 6.32  | 6.49  |
| 1555196_at   | <i>NA</i>       | 2.775 | 2.275 | 2.275 |
| 240591_at    | <i>KCNIP4</i>   | 3.045 | 2.495 | 2.505 |
| 204248_at    | <i>GNA11</i>    | 6.8   | 5.61  | 5.55  |
| 242180_at    | <i>TSPAN16</i>  | 3.965 | 3.255 | 3.245 |
| 243161_x_at  | <i>ZFP42</i>    | 3.34  | 2.75  | 2.73  |
| 212884_x_at  | <i>TOMM40</i>   | 7.335 | 6.085 | 5.945 |
| 235406_x_at  | <i>NA</i>       | 6.36  | 5.16  | 5.27  |
| 224153_s_at  | <i>NA</i>       | 3.87  | 3.17  | 3.18  |
| 241038_at    | <i>CHRM3</i>    | 3.165 | 2.605 | 2.595 |
| 1559406_at   | <i>ANKRD18A</i> | 2.945 | 2.425 | 2.415 |
| 229303_at    | <i>NA</i>       | 9.61  | 7.94  | 7.84  |
| 239596_at    | <i>SLC30A7</i>  | 6.735 | 5.535 | 5.525 |
| 230618_s_at  | <i>NA</i>       | 13.56 | 11.01 | 11.27 |
| 202438_x_at  | <i>IDS</i>      | 9.97  | 8.2   | 8.18  |
| 221681_s_at  | <i>DSPP</i>     | 6.655 | 5.525 | 5.425 |
| 220459_at    | <i>MCM3APAS</i> | 3.46  | 2.85  | 2.83  |
| 239855_at    | <i>PPMIL</i>    | 2.665 | 2.185 | 2.185 |
| 223580_at    | <i>SPSB2</i>    | 5.03  | 4.15  | 4.11  |
| 239878_at    | <i>IPMK</i>     | 3.885 | 3.205 | 3.175 |
| 238439_at    | <i>ANKRD22</i>  | 2.755 | 2.265 | 2.255 |
| 1561531_at   | <i>NA</i>       | 2.485 | 2.025 | 2.065 |

|              |                 |        |       |       |
|--------------|-----------------|--------|-------|-------|
| 227877_at    | <i>AXIIR</i>    | 2.895  | 2.365 | 2.385 |
| 231277_x_at  | <i>DTWD2</i>    | 3.735  | 3.085 | 3.055 |
| 223578_x_at  | <i>PRO1073</i>  | 9.895  | 8.225 | 8.045 |
| 241965_at    | <i>LARP5</i>    | 3.075  | 2.535 | 2.525 |
| 215172_at    | <i>PTPN20B</i>  | 3.285  | 2.705 | 2.695 |
| 220433_at    | <i>PRRG3</i>    | 2.705  | 2.225 | 2.215 |
| 1552319_a_at | <i>KLK8</i>     | 4.275  | 3.525 | 3.505 |
| 1557275_a_at | <i>NA</i>       | 7.53   | 6.18  | 6.21  |
| 221925_s_at  | <i>CSPP1</i>    | 3.755  | 3.115 | 3.065 |
| 1554953_a_at | <i>C21orf90</i> | 3.165  | 2.595 | 2.615 |
| 208009_s_at  | <i>ARHGEF16</i> | 2.85   | 2.36  | 2.34  |
| 215646_s_at  | <i>VCAN</i>     | 10.855 | 8.955 | 8.905 |
| 91682_at     | <i>EXOSC4</i>   | 3.26   | 2.69  | 2.68  |
| 217316_at    | <i>OR7A10</i>   | 3.62   | 2.98  | 2.98  |
| 220039_s_at  | <i>CDKAL1</i>   | 3.125  | 2.575 | 2.565 |
| 214637_at    | <i>OSM</i>      | 3.05   | 2.5   | 2.52  |
| 220443_s_at  | <i>VAX2</i>     | 4.78   | 3.98  | 3.89  |
| 217061_s_at  | <i>ETV1</i>     | 5.11   | 4.22  | 4.19  |
| 206148_at    | <i>IL3RA</i>    | 2.86   | 2.39  | 2.33  |
| 215465_at    | <i>ABCA12</i>   | 2.985  | 2.465 | 2.455 |
| 220780_at    | <i>PLA2G3</i>   | 2.95   | 2.43  | 2.43  |
| 213633_at    | <i>SH3BP1</i>   | 2.72   | 2.26  | 2.22  |
| 237555_at    | <i>ING1</i>     | 3.85   | 3.17  | 3.17  |
| 238706_at    | <i>PAPD4</i>    | 3.505  | 2.875 | 2.895 |
| 228731_at    | <i>NA</i>       | 3.04   | 2.51  | 2.5   |
| 228625_at    | <i>CITED4</i>   | 2.935  | 2.415 | 2.415 |
| 236297_at    | <i>NA</i>       | 3.115  | 2.585 | 2.555 |
| 205277_at    | <i>PRDM2</i>    | 5.145  | 4.205 | 4.275 |
| 239773_at    | <i>GTPBP10</i>  | 3.19   | 2.63  | 2.63  |
| 223564_s_at  | <i>GNBIL</i>    | 2.72   | 2.24  | 2.24  |
| 240243_at    | <i>FGF2</i>     | 3.125  | 2.585 | 2.575 |

|              |                  |       |       |       |
|--------------|------------------|-------|-------|-------|
| 210686_x_at  | <i>SLC25A16</i>  | 7.615 | 6.195 | 6.355 |
| 215705_at    | <i>PPP5C</i>     | 3.545 | 2.925 | 2.925 |
| 215369_at    | <i>LOC90120</i>  | 3.235 | 2.685 | 2.655 |
| 219955_at    | <i>LITD1</i>     | 3.06  | 2.54  | 2.5   |
| 243749_s_at  | <i>NA</i>        | 3.155 | 2.625 | 2.575 |
| 1558167_a_at | <i>MGC16275</i>  | 3.54  | 2.94  | 2.9   |
| 222600_s_at  | <i>UBE1L2</i>    | 10.14 | 8.38  | 8.34  |
| 209480_at    | <i>HLA-DQB1</i>  | 3.525 | 2.905 | 2.905 |
| 232519_at    | <i>NSFL1C</i>    | 2.61  | 2.15  | 2.15  |
| 233823_at    | <i>KIAA1276</i>  | 3.005 | 2.485 | 2.475 |
| 238078_at    | <i>SEC22A</i>    | 8.035 | 6.635 | 6.625 |
| 1566887_x_at | <i>NA</i>        | 9.725 | 7.945 | 8.095 |
| 216474_x_at  | <i>TPSAB1</i>    | 2.585 | 2.125 | 2.125 |
| 204969_s_at  | <i>RDX</i>       | 8.885 | 7.415 | 7.245 |
| 237761_at    | <i>NEK6</i>      | 2.94  | 2.43  | 2.42  |
| 232589_at    | <i>NA</i>        | 3.31  | 2.72  | 2.75  |
| 223979_x_at  | <i>FTCD</i>      | 4.155 | 3.435 | 3.425 |
| 207635_s_at  | <i>KCNHI</i>     | 2.875 | 2.375 | 2.375 |
| 1557961_s_at | <i>LOC642730</i> | 9.73  | 8.07  | 7.99  |
| 212443_at    | <i>NBEAL2</i>    | 2.65  | 2.19  | 2.19  |
| 243440_at    | <i>NA</i>        | 3.02  | 2.52  | 2.47  |
| 1558770_a_at | <i>C17orf38</i>  | 2.66  | 2.2   | 2.2   |
| 232957_x_at  | <i>NA</i>        | 3.985 | 3.315 | 3.265 |
| 219372_at    | <i>IFT81</i>     | 9.645 | 7.955 | 7.975 |
| 1553710_at   | <i>FLJ31659</i>  | 3.395 | 2.815 | 2.775 |
| 202971_s_at  | <i>DYRK2</i>     | 11.47 | 9.49  | 9.45  |
| 1556925_at   | <i>SMC3</i>      | 3.69  | 3.07  | 3.03  |
| 232470_at    | <i>SNFILK</i>    | 2.75  | 2.27  | 2.27  |
| 241951_at    | <i>NA</i>        | 3.545 | 2.945 | 2.905 |
| 241647_x_at  | <i>NA</i>        | 3.82  | 3.18  | 3.13  |
| 208189_s_at  | <i>MYO7A</i>     | 2.545 | 2.125 | 2.085 |

|              |                  |        |        |        |
|--------------|------------------|--------|--------|--------|
| 241245_at    | <i>SFRS4</i>     | 3.61   | 2.99   | 2.98   |
| 218778_x_at  | <i>EPS8L1</i>    | 4.015  | 3.345  | 3.295  |
| 222938_x_at  | <i>ENPP3</i>     | 2.605  | 2.155  | 2.145  |
| 229700_at    | <i>ZNF738</i>    | 9.715  | 7.995  | 8.075  |
| 216112_at    | <i>PKN2</i>      | 4.35   | 3.61   | 3.58   |
| 221723_s_at  | <i>SLC4A5</i>    | 2.775  | 2.285  | 2.305  |
| 223327_x_at  | <i>FLJ22795</i>  | 6.095  | 5.065  | 5.005  |
| 242916_at    | <i>CEP110</i>    | 4.49   | 3.73   | 3.69   |
| 224600_at    | <i>CGGBP1</i>    | 8.685  | 7.255  | 7.115  |
| 240215_at    | <i>RAP1A</i>     | 2.845  | 2.355  | 2.345  |
| 212938_at    | <i>COL6A1</i>    | 3.12   | 2.6    | 2.56   |
| 1566150_at   | <i>CALML4</i>    | 3.25   | 2.69   | 2.69   |
| 235964_x_at  | <i>C20orf118</i> | 10.2   | 8.46   | 8.41   |
| 1561373_at   | <i>LOC285796</i> | 2.585  | 2.145  | 2.145  |
| 226631_at    | <i>LOC399818</i> | 8.48   | 7.1    | 6.94   |
| 242950_x_at  | <i>SNX4</i>      | 3.03   | 2.53   | 2.49   |
| 240084_at    | <i>CBX2</i>      | 3.39   | 2.78   | 2.84   |
| 1563250_at   | <i>NA</i>        | 2.71   | 2.26   | 2.24   |
| 242376_at    | <i>NA</i>        | 4.68   | 3.89   | 3.86   |
| 225400_at    | <i>C1orf19</i>   | 3.045  | 2.515  | 2.535  |
| 236495_at    | <i>PBEF1</i>     | 3.87   | 3.19   | 3.22   |
| 207578_s_at  | <i>HTR4</i>      | 5.35   | 4.43   | 4.43   |
| 211128_at    | <i>EDA</i>       | 2.31   | 1.91   | 1.91   |
| 224410_s_at  | <i>LMBR1</i>     | 2.975  | 2.465  | 2.455  |
| 209764_at    | <i>NA</i>        | 3.905  | 3.255  | 3.205  |
| 205325_at    | <i>PHYHIP</i>    | 2.395  | 1.975  | 1.985  |
| 1569246_a_at | <i>C8orf74</i>   | 3.385  | 2.815  | 2.785  |
| 213048_s_at  | <i>NA</i>        | 14.965 | 12.395 | 12.385 |
| 229216_s_at  | <i>CSNK2A1</i>   | 2.775  | 2.295  | 2.295  |
| 205560_at    | <i>PCSK5</i>     | 3.49   | 2.86   | 2.92   |
| 1561642_at   | <i>PHACTR1</i>   | 3.465  | 2.845  | 2.885  |

|              |                  |        |       |       |
|--------------|------------------|--------|-------|-------|
| 228427_at    | <i>ZNF395</i>    | 2.9    | 2.4   | 2.4   |
| 231355_at    | <i>NA</i>        | 3.76   | 3.13  | 3.1   |
| 215214_at    | <i>IGL@</i>      | 4.005  | 3.325 | 3.315 |
| 242849_at    | <i>SASH1</i>     | 3.305  | 2.745 | 2.745 |
| 209528_s_at  | <i>TELO2</i>     | 4.285  | 3.565 | 3.535 |
| 223053_x_at  | <i>SSU72</i>     | 7.075  | 5.915 | 5.805 |
| 1556075_at   | <i>BMPR2</i>     | 4.43   | 3.67  | 3.67  |
| 220538_at    | <i>ADM2</i>      | 2.995  | 2.475 | 2.485 |
| 1556012_at   | <i>KLHDC7A</i>   | 2.645  | 2.195 | 2.185 |
| 1569905_at   | <i>HSD11B1L</i>  | 3.14   | 2.63  | 2.58  |
| 218887_at    | <i>MRPL2</i>     | 3.265  | 2.705 | 2.705 |
| 233871_at    | <i>NA</i>        | 3.71   | 3.08  | 3.07  |
| 229929_at    | <i>SPSB4</i>     | 2.8    | 2.32  | 2.32  |
| 241248_at    | <i>TNFSF11</i>   | 2.725  | 2.255 | 2.265 |
| 238777_x_at  | <i>LOC728210</i> | 2.8    | 2.32  | 2.32  |
| 240565_at    | <i>ZFP28</i>     | 2.615  | 2.175 | 2.165 |
| 1558390_at   | <i>ZNF599</i>    | 3.665  | 3.045 | 3.035 |
| 1562724_at   | <i>LOC286114</i> | 3.31   | 2.76  | 2.73  |
| 221975_s_at  | <i>C21orf2</i>   | 3.27   | 2.7   | 2.72  |
| 208211_s_at  | <i>ALK</i>       | 2.48   | 2.08  | 2.04  |
| 1561685_a_at | <i>LOC441178</i> | 2.945  | 2.445 | 2.435 |
| 219884_at    | <i>LHX6</i>      | 2.71   | 2.25  | 2.25  |
| 238277_at    | <i>TNKS</i>      | 3.315  | 2.765 | 2.745 |
| 214666_x_at  | <i>NA</i>        | 4.92   | 4.08  | 4.08  |
| 230872_s_at  | <i>ARPC4</i>     | 3.315  | 2.775 | 2.735 |
| 1552409_a_at | <i>ODF4</i>      | 2.94   | 2.44  | 2.44  |
| 210705_s_at  | <i>TRIM5</i>     | 10.425 | 8.705 | 8.595 |
| 1556319_at   | <i>LOC283270</i> | 2.775  | 2.295 | 2.305 |
| 232076_at    | <i>ZNF707</i>    | 4.6    | 3.77  | 3.87  |
| 232187_at    | <i>PALMD</i>     | 2.86   | 2.38  | 2.37  |
| 207593_at    | <i>ABCG4</i>     | 2.94   | 2.44  | 2.44  |

|              |                 |        |       |       |
|--------------|-----------------|--------|-------|-------|
| 227427_at    | <i>GEFT</i>     | 5.4    | 4.5   | 4.46  |
| 214504_at    | <i>ABO</i>      | 2.55   | 2.12  | 2.11  |
| 220554_at    | <i>SLC22A7</i>  | 3.845  | 3.225 | 3.155 |
| 229745_x_at  | <i>DACT3</i>    | 3.11   | 2.6   | 2.57  |
| 226940_at    | <i>FAM69B</i>   | 2.72   | 2.26  | 2.26  |
| 1560962_at   | <i>NA</i>       | 3.65   | 3.02  | 3.04  |
| 234271_at    | <i>OTOP2</i>    | 2.84   | 2.38  | 2.34  |
| 217582_at    | <i>KCNIP4</i>   | 3.54   | 2.97  | 2.91  |
| 216704_at    | <i>TBCA</i>     | 3.245  | 2.705 | 2.695 |
| 1569690_at   | <i>CCDC36</i>   | 3.7    | 3.1   | 3.06  |
| 214893_x_at  | <i>HCN2</i>     | 4.195  | 3.495 | 3.485 |
| 217391_x_at  | <i>NA</i>       | 3.005  | 2.505 | 2.495 |
| 1562415_a_at | <i>SPOCD1</i>   | 7.195  | 5.945 | 6.005 |
| 237548_at    | <i>ZAK</i>      | 2.84   | 2.36  | 2.36  |
| 236730_at    | <i>GIPC3</i>    | 2.62   | 2.18  | 2.18  |
| 241037_at    | <i>NA</i>       | 3.645  | 3.035 | 3.015 |
| 215289_at    | <i>ZNF419</i>   | 3.515  | 2.925 | 2.915 |
| 215135_at    | <i>DNPEP</i>    | 4.195  | 3.485 | 3.495 |
| 240305_at    | <i>DIP2C</i>    | 3.125  | 2.615 | 2.585 |
| 236736_at    | <i>NA</i>       | 4.755  | 4.005 | 3.905 |
| 230221_at    | <i>BAT5</i>     | 4.075  | 3.405 | 3.375 |
| 241201_at    | <i>KIAA1530</i> | 2.61   | 2.16  | 2.18  |
| 223069_s_at  | <i>EML4</i>     | 3.45   | 2.88  | 2.86  |
| 210197_at    | <i>ITPK1</i>    | 2.46   | 2.04  | 2.04  |
| 236794_at    | <i>CTBP2</i>    | 3.305  | 2.745 | 2.745 |
| 203312_x_at  | <i>ARF6</i>     | 9.975  | 8.395 | 8.195 |
| 243463_s_at  | <i>RIT1</i>     | 11.055 | 9.125 | 9.265 |
| 214133_at    | <i>MUC6</i>     | 3.485  | 2.895 | 2.905 |
| 244506_at    | <i>TMTC1</i>    | 2.89   | 2.42  | 2.4   |
| 206077_at    | <i>KEL</i>      | 2.76   | 2.3   | 2.3   |
| 207498_s_at  | <i>CYP2D6</i>   | 2.88   | 2.41  | 2.39  |



|              |                      |        |       |       |
|--------------|----------------------|--------|-------|-------|
| 209810_at    | <i>SFTPB</i>         | 5.25   | 4.42  | 4.32  |
| 208652_at    | <i>PPP2CA</i>        | 10.245 | 8.555 | 8.495 |
| 206654_s_at  | <i>POLR3G</i>        | 3.525  | 2.925 | 2.935 |
| 230115_at    | <i>DKFZp779M0652</i> | 3.305  | 2.745 | 2.755 |
| 241455_at    | <i>NA</i>            | 3.125  | 2.615 | 2.595 |
| 205170_at    | <i>STAT2</i>         | 2.89   | 2.41  | 2.41  |
| 1562065_at   | <i>NA</i>            | 3.47   | 2.91  | 2.87  |
| 225380_at    | <i>LOC91461</i>      | 3.745  | 3.125 | 3.115 |
| 241030_at    | <i>FSIP1</i>         | 3.055  | 2.545 | 2.535 |
| 206323_x_at  | <i>OPHN1</i>         | 10.345 | 8.715 | 8.505 |
| 1566581_at   | <i>CLPB</i>          | 3.375  | 2.835 | 2.795 |
| 220103_s_at  | <i>MRPS18C</i>       | 3.57   | 2.98  | 2.96  |
| 227216_at    | <i>RLTPR</i>         | 3.78   | 3.16  | 3.13  |
| 211184_s_at  | <i>USH1C</i>         | 2.77   | 2.33  | 2.29  |
| 220544_at    | <i>TSKS</i>          | 2.825  | 2.355 | 2.345 |
| 231851_at    | <i>RAVER2</i>        | 3.425  | 2.855 | 2.845 |
| 1559618_at   | <i>DTX1</i>          | 2.685  | 2.245 | 2.245 |
| 231681_x_at  | <i>HIST3H2A</i>      | 2.97   | 2.47  | 2.47  |
| 235180_at    | <i>STYX</i>          | 4.475  | 3.705 | 3.755 |
| 240432_x_at  | <i>NA</i>            | 7.625  | 6.365 | 6.335 |
| 243638_at    | <i>QKI</i>           | 3.25   | 2.71  | 2.71  |
| 211326_x_at  | <i>HFE</i>           | 2.925  | 2.455 | 2.435 |
| 1556015_a_at | <i>MESP2</i>         | 2.245  | 1.875 | 1.865 |
| 217435_x_at  | <i>NA</i>            | 2.835  | 2.355 | 2.355 |
| 201647_s_at  | <i>SCARB2</i>        | 9.105  | 7.635 | 7.545 |
| 207862_at    | <i>UPK2</i>          | 4.05   | 3.38  | 3.36  |
| 242857_at    | <i>FARP2</i>         | 3.61   | 3.04  | 2.98  |
| 230891_at    | <i>TUBE1</i>         | 3.445  | 2.875 | 2.865 |
| 1562074_a_at | <i>UNC13C</i>        | 3      | 2.5   | 2.5   |
| 1558440_at   | <i>TMEM64</i>        | 2.975  | 2.485 | 2.475 |
| 209008_x_at  | <i>KRT8</i>          | 3.325  | 2.755 | 2.785 |

|              |                      |       |       |       |
|--------------|----------------------|-------|-------|-------|
| 229545_at    | <i>C20orf42</i>      | 2.79  | 2.35  | 2.3   |
| 1554038_at   | <i>LARP2</i>         | 2.65  | 2.21  | 2.21  |
| 208262_x_at  | <i>MEFV</i>          | 2.68  | 2.24  | 2.24  |
| 233302_at    | <i>BCL11B</i>        | 3.13  | 2.58  | 2.64  |
| 226904_at    | <i>SLC6A8</i>        | 3.525 | 2.955 | 2.935 |
| 236010_at    | <i>SH3D19</i>        | 3.73  | 3.13  | 3.09  |
| 221597_s_at  | <i>HSPC171</i>       | 9.77  | 8.08  | 8.22  |
| 201263_at    | <i>TARS</i>          | 11.87 | 10.02 | 9.79  |
| 209779_at    | <i>C12orf31</i>      | 3.78  | 3.17  | 3.15  |
| 214347_s_at  | <i>DDC</i>           | 3.6   | 3.02  | 2.98  |
| 214084_x_at  | <i>NCF1</i>          | 2.8   | 2.34  | 2.33  |
| 239080_at    | <i>NA</i>            | 3.61  | 3.01  | 3.01  |
| 236580_at    | <i>NA</i>            | 2.855 | 2.375 | 2.385 |
| 218747_s_at  | <i>TAPBPL</i>        | 3.135 | 2.595 | 2.645 |
| 226269_at    | <i>GDAP1</i>         | 7.715 | 6.495 | 6.375 |
| 1555892_s_at | <i>LOC253039</i>     | 3.435 | 2.885 | 2.855 |
| 37424_at     | <i>CCHCR1</i>        | 3.435 | 2.875 | 2.865 |
| 204110_at    | <i>HNMT</i>          | 2.77  | 2.31  | 2.31  |
| 239445_at    | <i>RAB6A</i>         | 2.835 | 2.375 | 2.375 |
| 236059_at    | <i>C11orf61</i>      | 3.28  | 2.73  | 2.75  |
| 1555132_at   | <i>NA</i>            | 2.705 | 2.265 | 2.255 |
| 224124_at    | <i>ZRANB3</i>        | 3.245 | 2.735 | 2.685 |
| 1561961_at   | <i>DKFZp686A1627</i> | 3.235 | 2.705 | 2.685 |
| 209185_s_at  | <i>IRS2</i>          | 12.65 | 10.67 | 10.47 |
| 229791_at    | <i>CAPNS2</i>        | 3.25  | 2.72  | 2.71  |
| 238924_at    | <i>LOC399761</i>     | 3.005 | 2.515 | 2.505 |
| 230307_at    | <i>SLC25A21</i>      | 3.56  | 3.01  | 2.95  |
| 230662_at    | <i>RNF187</i>        | 3.015 | 2.535 | 2.505 |
| 243200_at    | <i>NA</i>            | 3.445 | 2.895 | 2.875 |
| 210193_at    | <i>MOBP</i>          | 3.455 | 2.895 | 2.885 |
| 241834_at    | <i>NA</i>            | 3.095 | 2.595 | 2.585 |

|              |                    |        |       |       |
|--------------|--------------------|--------|-------|-------|
| 220319_s_at  | <i>MYLIP</i>       | 3.745  | 3.125 | 3.125 |
| 237121_at    | <i>NA</i>          | 3.44   | 2.88  | 2.88  |
| 1553915_at   | <i>C10orf126</i>   | 3.565  | 2.995 | 2.965 |
| 1567036_at   | <i>C20orf181</i>   | 3.085  | 2.595 | 2.575 |
| 216702_x_at  | <i>ATP8A2</i>      | 3.93   | 3.28  | 3.29  |
| 1556182_x_at | <i>DRAP1</i>       | 3.145  | 2.635 | 2.625 |
| 1567590_at   | <i>NA</i>          | 3.155  | 2.645 | 2.635 |
| 227205_at    | <i>TAF1</i>        | 9.16   | 7.58  | 7.75  |
| 233277_at    | <i>DLEU7</i>       | 2.46   | 2.06  | 2.06  |
| 1567256_at   | <i>OR1J2</i>       | 3.525  | 2.955 | 2.935 |
| 233001_at    | <i>SAMD10</i>      | 4.28   | 3.59  | 3.57  |
| 207787_at    | <i>KRT33B</i>      | 2.66   | 2.23  | 2.22  |
| 1565860_at   | <i>USP34</i>       | 2.71   | 2.27  | 2.27  |
| 233920_at    | <i>MAD1L1</i>      | 2.58   | 2.16  | 2.16  |
| 233741_at    | <i>FTCD</i>        | 3.03   | 2.53  | 2.53  |
| 213197_at    | <i>ASTN1</i>       | 2.71   | 2.27  | 2.27  |
| 209433_s_at  | <i>PAICS</i>       | 6.785  | 5.735 | 5.625 |
| 225072_at    | <i>ZCCHC3</i>      | 2.95   | 2.46  | 2.47  |
| 211586_s_at  | <i>ATP2B2</i>      | 2.73   | 2.28  | 2.3   |
| 205693_at    | <i>TNNT3</i>       | 3.115  | 2.615 | 2.605 |
| 206011_at    | <i>CASP1</i>       | 2.84   | 2.38  | 2.38  |
| 203783_x_at  | <i>POLRMT</i>      | 2.605  | 2.185 | 2.175 |
| 237106_at    | <i>SLC11A2</i>     | 3.625  | 3.045 | 3.035 |
| 232887_at    | <i>hCG_1776018</i> | 2.55   | 2.13  | 2.13  |
| 238048_at    | <i>CLASP2</i>      | 2.95   | 2.48  | 2.47  |
| 212145_at    | <i>MRPS27</i>      | 6.585  | 5.575 | 5.475 |
| 211407_at    | <i>NDUFB7</i>      | 3.405  | 2.865 | 2.835 |
| 232163_at    | <i>WDR19</i>       | 3.2    | 2.67  | 2.69  |
| 222129_at    | <i>C2orf17</i>     | 10.845 | 9.095 | 9.075 |
| 243906_at    | <i>OSTalpha</i>    | 3.83   | 3.24  | 3.18  |
| 231086_at    | <i>BACE1</i>       | 3.91   | 3.24  | 3.31  |

|              |                  |        |        |        |
|--------------|------------------|--------|--------|--------|
| 1570430_at   | <i>NA</i>        | 3.13   | 2.63   | 2.62   |
| 214105_at    | <i>SOCS3</i>     | 2.72   | 2.28   | 2.28   |
| 201873_s_at  | <i>ABCE1</i>     | 9.4    | 7.87   | 7.89   |
| 202473_x_at  | <i>HCFC1</i>     | 2.84   | 2.37   | 2.39   |
| 1570633_at   | <i>NA</i>        | 3.82   | 3.21   | 3.19   |
| 228575_at    | <i>IL20RB</i>    | 3.25   | 2.72   | 2.73   |
| 1555103_s_at | <i>FGF7</i>      | 3.545  | 2.975  | 2.965  |
| 226001_at    | <i>KLHL5</i>     | 12     | 10.01  | 10.12  |
| 233675_s_at  | <i>LOC374491</i> | 3.425  | 2.865  | 2.875  |
| 203294_s_at  | <i>LMAN1</i>     | 6.61   | 5.53   | 5.56   |
| 231615_at    | <i>C8orf70</i>   | 3.265  | 2.745  | 2.735  |
| 1564004_at   | <i>DGKG</i>      | 3.555  | 3.005  | 2.955  |
| 222927_s_at  | <i>CPLX3</i>     | 3.285  | 2.765  | 2.755  |
| 234342_at    | <i>NA</i>        | 3.11   | 2.63   | 2.59   |
| 243975_at    | <i>RTN4RL1</i>   | 3.165  | 2.665  | 2.655  |
| 220051_at    | <i>PRSS21</i>    | 2.795  | 2.355  | 2.345  |
| 221038_at    | <i>NA</i>        | 3.255  | 2.735  | 2.735  |
| 203253_s_at  | <i>HISPPD1</i>   | 10.41  | 8.68   | 8.79   |
| 236770_at    | <i>LOC283507</i> | 2.715  | 2.275  | 2.275  |
| 222236_s_at  | <i>DDEFL1</i>    | 5.24   | 4.44   | 4.36   |
| 1559481_at   | <i>CHIC1</i>     | 3.085  | 2.595  | 2.585  |
| 1555474_at   | <i>TTLL3</i>     | 3.46   | 2.93   | 2.88   |
| 223770_x_at  | <i>MGC3207</i>   | 3.33   | 2.79   | 2.79   |
| 1563834_a_at | <i>C1orf62</i>   | 3.435  | 2.885  | 2.875  |
| 242082_at    | <i>MMAB</i>      | 2.63   | 2.21   | 2.21   |
| 234947_s_at  | <i>C10orf84</i>  | 9.98   | 8.32   | 8.44   |
| 201961_s_at  | <i>RNF41</i>     | 3.015  | 2.525  | 2.535  |
| 208300_at    | <i>PTPRH</i>     | 3.22   | 2.7    | 2.7    |
| 228746_s_at  | <i>CDV3</i>      | 12.935 | 10.975 | 10.735 |
| 231273_x_at  | <i>FRZB</i>      | 3.21   | 2.71   | 2.68   |
| 203940_s_at  | <i>VASH1</i>     | 4.24   | 3.55   | 3.58   |

|              |                  |       |       |       |
|--------------|------------------|-------|-------|-------|
| 243410_at    | <i>PTPN2</i>     | 2.77  | 2.33  | 2.33  |
| 224816_at    | <i>C7orf20</i>   | 2.77  | 2.33  | 2.33  |
| 205009_at    | <i>TFF1</i>      | 2.74  | 2.3   | 2.3   |
| 213671_s_at  | <i>MARS</i>      | 10.37 | 8.62  | 8.8   |
| 1564294_at   | <i>KIAA1128</i>  | 3     | 2.53  | 2.51  |
| 219712_s_at  | <i>CARKL</i>     | 2.675 | 2.255 | 2.245 |
| 214589_at    | <i>FGF12</i>     | 3.595 | 3.025 | 3.005 |
| 217222_at    | <i>IGHG1</i>     | 2.655 | 2.235 | 2.235 |
| 213794_s_at  | <i>NGDN</i>      | 7.76  | 6.47  | 6.57  |
| 1570138_at   | <i>NA</i>        | 3.045 | 2.565 | 2.555 |
| 242603_x_at  | <i>NA</i>        | 3.455 | 2.915 | 2.885 |
| 224501_at    | <i>C1orf170</i>  | 3.075 | 2.575 | 2.585 |
| 1553823_a_at | <i>RTP1</i>      | 2.955 | 2.475 | 2.485 |
| 233937_at    | <i>ZNF403</i>    | 2.785 | 2.335 | 2.345 |
| 205774_at    | <i>F12</i>       | 2.465 | 2.065 | 2.065 |
| 205926_at    | <i>IL27RA</i>    | 3.965 | 3.325 | 3.335 |
| 219487_at    | <i>BBS10</i>     | 8.955 | 7.505 | 7.555 |
| 239101_at    | <i>ITCH</i>      | 7.725 | 6.425 | 6.555 |
| 241361_at    | <i>KIAA1833</i>  | 3.175 | 2.675 | 2.675 |
| 235129_at    | <i>PPP1RIA</i>   | 2.9   | 2.46  | 2.41  |
| 234669_x_at  | <i>HSA251708</i> | 5.14  | 4.34  | 4.3   |
| 241381_at    | <i>CXorf36</i>   | 2.935 | 2.475 | 2.465 |
| 212210_at    | <i>INTS1</i>     | 3.105 | 2.615 | 2.605 |
| 223638_at    | <i>NBPF3</i>     | 5.71  | 4.78  | 4.83  |
| 1563178_at   | <i>NA</i>        | 2.65  | 2.23  | 2.23  |
| 219103_at    | <i>DDEFL1</i>    | 4.03  | 3.38  | 3.4   |
| 1555843_at   | <i>HNRPM</i>     | 2.595 | 2.185 | 2.175 |
| 1562292_at   | <i>ANKRD30B</i>  | 4.03  | 3.41  | 3.37  |
| 1558631_at   | <i>PPARA</i>     | 2.965 | 2.515 | 2.485 |
| 215712_s_at  | <i>IGFALS</i>    | 3.2   | 2.7   | 2.69  |
| 232389_at    | <i>WIPF3</i>     | 2.875 | 2.415 | 2.415 |

|             |                  |        |        |        |
|-------------|------------------|--------|--------|--------|
| 213139_at   | <i>SNAI2</i>     | 13.695 | 11.435 | 11.625 |
| 1559265_at  | <i>FLJ45187</i>  | 3.31   | 2.8    | 2.78   |
| 229142_s_at | <i>BBS1</i>      | 2.855  | 2.395  | 2.395  |
| 235664_at   | <i>LOC729620</i> | 3.16   | 2.66   | 2.66   |
| 1562038_at  | <i>LIPC</i>      | 3.18   | 2.69   | 2.67   |
| 242747_at   | <i>NA</i>        | 3.675  | 3.105  | 3.085  |
| 1562601_at  | <i>UNQ6975</i>   | 2.92   | 2.47   | 2.44   |
| 206588_at   | <i>DAZL</i>      | 3.145  | 2.655  | 2.635  |
| 210785_s_at | <i>C1orf38</i>   | 2.58   | 2.18   | 2.17   |
| 221023_s_at | <i>KCNH6</i>     | 3.185  | 2.665  | 2.705  |
| 219815_at   | <i>GAL3ST4</i>   | 8.735  | 7.405  | 7.305  |
| 243084_at   | <i>CALD1</i>     | 2.9    | 2.44   | 2.45   |
| 214222_at   | <i>DNAH7</i>     | 5.095  | 4.245  | 4.335  |
| 218360_at   | <i>RAB22A</i>    | 10.07  | 8.46   | 8.52   |
| 229954_at   | <i>NA</i>        | 2.67   | 2.24   | 2.26   |
| 242190_at   | <i>SDAD1</i>     | 3.735  | 3.165  | 3.135  |
| 204528_s_at | <i>NAPILI</i>    | 14.395 | 12.225 | 12.045 |
| 230908_at   | <i>NA</i>        | 2.865  | 2.405  | 2.415  |
| 217800_s_at | <i>NDFI1</i>     | 10.29  | 8.62   | 8.72   |
| 237041_x_at | <i>RCOR1</i>     | 3.885  | 3.265  | 3.265  |
| 232775_at   | <i>NA</i>        | 3.405  | 2.875  | 2.865  |
| 207771_at   | <i>SLC5A2</i>    | 3.035  | 2.555  | 2.555  |
| 1562459_at  | <i>NA</i>        | 3.655  | 3.105  | 3.045  |
| 240624_x_at | <i>NA</i>        | 4.155  | 3.535  | 3.465  |
| 209306_s_at | <i>SWAP70</i>    | 11.57  | 9.66   | 9.84   |
| 207618_s_at | <i>BCSIL</i>     | 7.595  | 6.395  | 6.405  |
| 210352_at   | <i>BRD8</i>      | 2.475  | 2.095  | 2.085  |
| 212853_at   | <i>DCUNID4</i>   | 4.04   | 3.43   | 3.37   |
| 241490_s_at | <i>PGBD2</i>     | 2.94   | 2.48   | 2.48   |
| 231317_at   | <i>TSNARE1</i>   | 3.025  | 2.575  | 2.525  |
| 205662_at   | <i>EPPB9</i>     | 3.245  | 2.755  | 2.735  |

|             |                      |        |       |       |
|-------------|----------------------|--------|-------|-------|
| 241903_at   | <i>KCTD3</i>         | 4.07   | 3.43  | 3.43  |
| 231492_at   | <i>NA</i>            | 3.145  | 2.645 | 2.655 |
| 233781_s_at | <i>RIFI</i>          | 3.445  | 2.925 | 2.895 |
| 1566097_at  | <i>A2BPI</i>         | 2.505  | 2.115 | 2.105 |
| 237872_at   | <i>LRFN2</i>         | 2.995  | 2.535 | 2.525 |
| 236874_at   | <i>TSSK3</i>         | 3.245  | 2.745 | 2.745 |
| 202330_s_at | <i>UNG</i>           | 8.495  | 7.185 | 7.155 |
| 238060_s_at | <i>B4GALNT4</i>      | 3.47   | 2.92  | 2.94  |
| 217283_at   | <i>NA</i>            | 3.025  | 2.555 | 2.545 |
| 206307_s_at | <i>FOXD1</i>         | 12.65  | 10.65 | 10.69 |
| 228339_at   | <i>ECSM2</i>         | 3.025  | 2.545 | 2.545 |
| 208876_s_at | <i>PAK2</i>          | 10.62  | 9.02  | 8.91  |
| 221588_x_at | <i>ALDH6A1</i>       | 4.77   | 4.05  | 4.01  |
| 230639_at   | <i>NA</i>            | 3.045  | 2.565 | 2.565 |
| 1553243_at  | <i>ITIH5</i>         | 3.405  | 2.875 | 2.865 |
| 226456_at   | <i>C16orf75</i>      | 6.535  | 5.565 | 5.465 |
| 227375_at   | <i>ANKRD13C</i>      | 9.345  | 7.865 | 7.905 |
| 244090_at   | <i>ITPR1</i>         | 4.61   | 3.88  | 3.9   |
| 226212_s_at | <i>NA</i>            | 3.58   | 3.05  | 3     |
| 236671_at   | <i>COMT</i>          | 5.815  | 4.915 | 4.915 |
| 1566033_at  | <i>CRTC3</i>         | 3.415  | 2.885 | 2.875 |
| 233067_at   | <i>NA</i>            | 3.015  | 2.555 | 2.545 |
| 221719_s_at | <i>LZTS1</i>         | 2.72   | 2.3   | 2.29  |
| 222601_at   | <i>UBEIL2</i>        | 9.215  | 7.735 | 7.825 |
| 231471_at   | <i>ZNF638</i>        | 3.13   | 2.66  | 2.64  |
| 1561789_at  | <i>DKFZP779L1068</i> | 3.7    | 3.15  | 3.09  |
| 216000_at   | <i>ASNS</i>          | 2.85   | 2.41  | 2.41  |
| 231736_x_at | <i>MGST1</i>         | 10.345 | 8.795 | 8.685 |
| 223345_at   | <i>HDAC8</i>         | 5.3    | 4.49  | 4.47  |
| 202447_at   | <i>DECRI</i>         | 11.24  | 9.59  | 9.41  |
| 244673_at   | <i>KIAA1841</i>      | 3.38   | 2.84  | 2.88  |

|              |                  |       |       |       |
|--------------|------------------|-------|-------|-------|
| 208071_s_at  | <i>LAIR1</i>     | 2.96  | 2.51  | 2.49  |
| 228094_at    | <i>AMICA1</i>    | 3.12  | 2.63  | 2.65  |
| 217235_x_at  | <i>NA</i>        | 3.36  | 2.84  | 2.84  |
| 220323_at    | <i>CNTD2</i>     | 2.86  | 2.44  | 2.4   |
| 217017_at    | <i>OSBPL10</i>   | 2.6   | 2.2   | 2.2   |
| 1556116_s_at | <i>PTPRS</i>     | 2.555 | 2.155 | 2.165 |
| 1553237_x_at | <i>PCDHAC1</i>   | 3.075 | 2.605 | 2.585 |
| 230460_at    | <i>MYLK</i>      | 2.98  | 2.54  | 2.5   |
| 201142_at    | <i>EIF2S1</i>    | 10.3  | 8.75  | 8.66  |
| 243744_at    | <i>LOC348751</i> | 3.23  | 2.73  | 2.73  |
| 233352_at    | <i>WWC1</i>      | 3.275 | 2.785 | 2.755 |
| 217365_at    | <i>PRAMEF5</i>   | 2.805 | 2.365 | 2.365 |
| 1559952_x_at | <i>LOC729689</i> | 3.805 | 3.225 | 3.215 |
| 226052_at    | <i>NA</i>        | 10.36 | 8.7   | 8.82  |
| 207230_at    | <i>CDON</i>      | 3.22  | 2.75  | 2.7   |
| 237083_at    | <i>NA</i>        | 3.475 | 2.945 | 2.935 |
| 218471_s_at  | <i>BBS1</i>      | 6.565 | 5.525 | 5.575 |
| 207032_s_at  | <i>CRISP1</i>    | 2.685 | 2.265 | 2.265 |
| 228636_at    | <i>BHLHB5</i>    | 3.205 | 2.715 | 2.705 |
| 218553_s_at  | <i>KCTD15</i>    | 4.755 | 4.015 | 4.025 |
| 215654_at    | <i>BCAT2</i>     | 2.88  | 2.44  | 2.44  |
| 202692_s_at  | <i>UBTF</i>      | 5.545 | 4.665 | 4.705 |
| 1553488_at   | <i>TEKT5</i>     | 2.745 | 2.325 | 2.325 |
| 228578_at    | <i>DRB1</i>      | 6.9   | 5.81  | 5.87  |
| 1561526_at   | <i>NA</i>        | 3.07  | 2.59  | 2.6   |
| 208725_at    | <i>EIF2S2</i>    | 5.155 | 4.315 | 4.405 |
| 220055_at    | <i>ZNF287</i>    | 2.77  | 2.35  | 2.34  |
| 226878_at    | <i>HLA-DOA</i>   | 2.705 | 2.285 | 2.285 |
| 223922_x_at  | <i>MS4A6A</i>    | 2.43  | 2.05  | 2.05  |
| 216134_at    | <i>FRMD4B</i>    | 3.345 | 2.835 | 2.825 |
| 1563039_at   | <i>LARGE</i>     | 3.53  | 2.99  | 2.99  |



|              |                  |        |       |       |
|--------------|------------------|--------|-------|-------|
| 228093_at    | <i>ZNF599</i>    | 3      | 2.52  | 2.56  |
| 206379_at    | <i>EYA3</i>      | 3.04   | 2.59  | 2.56  |
| 207311_at    | <i>DOC2B</i>     | 2.63   | 2.23  | 2.23  |
| 225636_at    | <i>STAT2</i>     | 13.84  | 11.6  | 11.84 |
| 1565887_at   | <i>TRPM7</i>     | 2.87   | 2.44  | 2.43  |
| 210272_at    | <i>CYP2B7P1</i>  | 2.51   | 2.14  | 2.12  |
| 1555049_at   | <i>C21orf29</i>  | 2.835  | 2.395 | 2.405 |
| 219291_at    | <i>DTWD1</i>     | 10.475 | 8.825 | 8.925 |
| 217555_at    | <i>SMC1A</i>     | 4.23   | 3.62  | 3.55  |
| 204968_at    | <i>C6orf47</i>   | 7.365  | 6.245 | 6.245 |
| 230410_at    | <i>NRP2</i>      | 3.05   | 2.59  | 2.58  |
| 1558553_at   | <i>KIAA0182</i>  | 2.515  | 2.135 | 2.135 |
| 239241_at    | <i>LOC727869</i> | 4.535  | 3.845 | 3.835 |
| 203138_at    | <i>HAT1</i>      | 11.39  | 9.58  | 9.72  |
| 225221_at    | <i>NA</i>        | 11.355 | 9.545 | 9.695 |
| 241771_at    | <i>RIMBP2</i>    | 2.78   | 2.36  | 2.36  |
| 1554110_at   | <i>CDCP1</i>     | 3.225  | 2.735 | 2.725 |
| 219912_s_at  | <i>ENPP3</i>     | 3.24   | 2.76  | 2.73  |
| 1555475_x_at | <i>TLL3</i>      | 4.235  | 3.635 | 3.555 |
| 210477_x_at  | <i>MAPK8</i>     | 2.51   | 2.13  | 2.13  |
| 1560671_at   | <i>KIAA1652</i>  | 2.53   | 2.15  | 2.15  |
| 207637_at    | <i>KIAA0789</i>  | 2.935  | 2.505 | 2.485 |
| 204746_s_at  | <i>PICK1</i>     | 3.085  | 2.625 | 2.625 |
| 214098_at    | <i>KIAA1107</i>  | 3.44   | 2.92  | 2.92  |
| 1552807_a_at | <i>SIGLEC10</i>  | 3.055  | 2.595 | 2.585 |
| 213349_at    | <i>TMCC1</i>     | 7.39   | 6.31  | 6.23  |
| 1560086_at   | <i>NA</i>        | 3.58   | 3.07  | 3.01  |
| 208466_at    | <i>RAB3D</i>     | 2.91   | 2.47  | 2.47  |
| 233000_x_at  | <i>NA</i>        | 2.93   | 2.49  | 2.49  |
| 244550_at    | <i>TFDP1</i>     | 3      | 2.54  | 2.54  |
| 223693_s_at  | <i>FLJ10324</i>  | 3.03   | 2.57  | 2.57  |

|              |                  |        |       |       |
|--------------|------------------|--------|-------|-------|
| 226408_at    | <i>TEAD2</i>     | 6.415  | 5.395 | 5.485 |
| 227090_at    | <i>PHF21A</i>    | 6.505  | 5.505 | 5.535 |
| 222000_at    | <i>C1orf174</i>  | 11.07  | 9.33  | 9.44  |
| 234791_at    | <i>GSH1</i>      | 3.005  | 2.555 | 2.535 |
| 226433_at    | <i>RNF157</i>    | 3.475  | 2.965 | 2.935 |
| 230297_x_at  | <i>SYNGAP1</i>   | 4.12   | 3.5   | 3.49  |
| 1569738_at   | <i>NA</i>        | 3.02   | 2.56  | 2.56  |
| 1561454_at   | <i>NA</i>        | 2.89   | 2.45  | 2.45  |
| 226800_at    | <i>KIAA1799</i>  | 6.74   | 5.74  | 5.7   |
| 218353_at    | <i>RGS5</i>      | 3.43   | 2.89  | 2.93  |
| 234681_s_at  | <i>CHD6</i>      | 2.55   | 2.17  | 2.17  |
| 211798_x_at  | <i>IGLJ3</i>     | 3.13   | 2.66  | 2.65  |
| 217251_x_at  | <i>IVD</i>       | 2.91   | 2.49  | 2.45  |
| 1569604_at   | <i>NA</i>        | 3.945  | 3.345 | 3.345 |
| 219381_at    | <i>FLJ13231</i>  | 5.14   | 4.38  | 4.34  |
| 216551_x_at  | <i>PLCG1</i>     | 5.76   | 4.88  | 4.89  |
| 1554062_at   | <i>XG</i>        | 10.445 | 8.935 | 8.795 |
| 240999_at    | <i>LOC401351</i> | 3.075  | 2.615 | 2.615 |
| 243077_at    | <i>FLJ16734</i>  | 3.405  | 2.915 | 2.855 |
| 1554510_s_at | <i>GHITM</i>     | 8.565  | 7.295 | 7.235 |
| 224498_x_at  | <i>AXIN2</i>     | 2.8    | 2.38  | 2.38  |
| 237353_at    | <i>CDKAL1</i>    | 3.54   | 3.02  | 2.99  |
| 234589_at    | <i>TMEM106A</i>  | 2.565  | 2.185 | 2.185 |
| 219741_x_at  | <i>ZNF552</i>    | 3.03   | 2.57  | 2.57  |
| 232357_at    | <i>TLL9</i>      | 2.51   | 2.13  | 2.13  |
| 1564112_at   | <i>FAM71A</i>    | 2.48   | 2.11  | 2.1   |
| 1559848_at   | <i>NSUN4</i>     | 3.47   | 2.95  | 2.95  |
| 1569879_a_at | <i>MEGF11</i>    | 2.39   | 2.03  | 2.03  |
| 207827_x_at  | <i>SNCA</i>      | 8.035  | 6.835 | 6.805 |
| 207414_s_at  | <i>PCSK6</i>     | 2.805  | 2.405 | 2.365 |
| 1561405_s_at | <i>PDIA3</i>     | 2.87   | 2.45  | 2.42  |

|              |                     |        |       |       |
|--------------|---------------------|--------|-------|-------|
| 228379_at    | <i>NUTF2</i>        | 8.855  | 7.545 | 7.495 |
| 239004_at    | <i>SQSTM1</i>       | 2.865  | 2.415 | 2.445 |
| 1560133_at   | <i>TNRC15</i>       | 3.47   | 2.94  | 2.95  |
| 233484_at    | <i>NA</i>           | 3.06   | 2.6   | 2.6   |
| 223801_s_at  | <i>APOL4</i>        | 3.795  | 3.255 | 3.185 |
| 233447_at    | <i>RP11-506K6.3</i> | 3.3    | 2.82  | 2.79  |
| 236141_at    | <i>NBLA00301</i>    | 3.365  | 2.875 | 2.855 |
| 206705_at    | <i>TULP1</i>        | 2.975  | 2.535 | 2.525 |
| 201451_x_at  | <i>RHEB</i>         | 5.465  | 4.615 | 4.675 |
| 221969_at    | <i>NA</i>           | 3.495  | 2.995 | 2.955 |
| 229392_s_at  | <i>PIK3R2</i>       | 4.825  | 4.125 | 4.075 |
| 230423_at    | <i>FOXD3</i>        | 2.81   | 2.39  | 2.39  |
| 201063_at    | <i>RCN1</i>         | 13.85  | 11.72 | 11.82 |
| 226770_at    | <i>MAGI3</i>        | 6.765  | 5.775 | 5.715 |
| 221224_s_at  | <i>DCAKD</i>        | 5.35   | 4.55  | 4.55  |
| 1562274_at   | <i>CDHI3</i>        | 2.53   | 2.15  | 2.15  |
| 1553599_a_at | <i>SYCP3</i>        | 3.65   | 3.12  | 3.1   |
| 230530_at    | <i>OSGIN1</i>       | 3.145  | 2.665 | 2.695 |
| 1553214_a_at | <i>CCDC7</i>        | 3.815  | 3.275 | 3.225 |
| 1555554_at   | <i>RP11-49G10.8</i> | 2.79   | 2.38  | 2.37  |
| 201055_s_at  | <i>HNRPA0</i>       | 8.115  | 6.955 | 6.865 |
| 1559439_s_at | <i>C21orf58</i>     | 3.5    | 3     | 2.96  |
| 203375_s_at  | <i>TPP2</i>         | 9.01   | 7.67  | 7.67  |
| 207822_at    | <i>FGFR1</i>        | 3.325  | 2.835 | 2.815 |
| 1552524_at   | <i>ART5</i>         | 2.73   | 2.33  | 2.32  |
| 216433_s_at  | <i>PRDM2</i>        | 2.85   | 2.43  | 2.42  |
| 240158_at    | <i>NA</i>           | 3.36   | 2.89  | 2.83  |
| 1558449_at   | <i>MBTD1</i>        | 3.465  | 2.955 | 2.945 |
| 212840_at    | <i>UBXD7</i>        | 10.955 | 9.305 | 9.365 |
| 238577_s_at  | <i>NA</i>           | 2.905  | 2.475 | 2.465 |
| 1558856_at   | <i>DMRTA2</i>       | 3.09   | 2.64  | 2.63  |

|              |                  |        |       |       |
|--------------|------------------|--------|-------|-------|
| 228540_at    | <i>QKI</i>       | 3.54   | 2.99  | 3.05  |
| 235187_s_at  | <i>C14orf135</i> | 2.99   | 2.55  | 2.54  |
| 205642_at    | <i>CEP110</i>    | 2.86   | 2.44  | 2.44  |
| 1552311_a_at | <i>RAXL1</i>     | 5.63   | 4.77  | 4.82  |
| 1563674_at   | <i>FCRL2</i>     | 2.84   | 2.41  | 2.43  |
| 1554857_at   | <i>ELMO2</i>     | 2.6    | 2.22  | 2.21  |
| 222911_s_at  | <i>CXorf36</i>   | 2.875  | 2.465 | 2.445 |
| 202526_at    | <i>SMAD4</i>     | 3.585  | 3.045 | 3.055 |
| 210657_s_at  | 4-Sep            | 2.84   | 2.43  | 2.41  |
| 242644_at    | <i>TMC8</i>      | 3.355  | 2.865 | 2.845 |
| 212291_at    | <i>HIPK1</i>     | 2.665  | 2.265 | 2.265 |
| 202725_at    | <i>POLR2A</i>    | 5.28   | 4.47  | 4.53  |
| 211715_s_at  | <i>BDHI</i>      | 3.145  | 2.685 | 2.675 |
| 1556240_at   | <i>ATG7</i>      | 2.755  | 2.355 | 2.345 |
| 244488_at    | <i>LSM14B</i>    | 2.55   | 2.18  | 2.16  |
| 239607_at    | <i>GPR156</i>    | 4.71   | 4.01  | 4.02  |
| 211248_s_at  | <i>CHRD</i>      | 2.795  | 2.375 | 2.375 |
| 230126_s_at  | <i>JMJD2B</i>    | 3.435  | 2.935 | 2.925 |
| 207172_s_at  | <i>CDH11</i>     | 7.665  | 6.585 | 6.475 |
| 241996_at    | <i>RUFY2</i>     | 10.545 | 8.905 | 9.075 |
| 203061_s_at  | <i>MDC1</i>      | 3.1    | 2.63  | 2.65  |
| 237455_at    | <i>FLJ45825</i>  | 2.515  | 2.145 | 2.135 |
| 222783_s_at  | <i>SMOC1</i>     | 2.495  | 2.135 | 2.125 |
| 231685_at    | <i>SOX5</i>      | 3.04   | 2.6   | 2.59  |
| 218915_at    | <i>NF2</i>       | 8.79   | 7.54  | 7.44  |
| 218763_at    | <i>STX18</i>     | 9.275  | 7.955 | 7.875 |
| 236658_at    | <i>NA</i>        | 2.96   | 2.52  | 2.53  |
| 1556595_at   | <i>WWOX</i>      | 3.11   | 2.66  | 2.65  |
| 231143_at    | <i>LOC642421</i> | 2.88   | 2.46  | 2.46  |
| 242680_at    | <i>NA</i>        | 3.075  | 2.625 | 2.615 |
| 230136_at    | <i>LOC400099</i> | 4.105  | 3.505 | 3.495 |

|              |                      |        |        |        |
|--------------|----------------------|--------|--------|--------|
| 1557389_at   | <i>SH3PXD2A</i>      | 2.815  | 2.405  | 2.395  |
| 238573_at    | <i>NA</i>            | 9.815  | 8.405  | 8.345  |
| 229115_at    | <i>DYNClHl</i>       | 10.04  | 8.49   | 8.64   |
| 228083_at    | <i>CACNA2D4</i>      | 3.01   | 2.57   | 2.57   |
| 210682_at    | <i>LPO</i>           | 2.535  | 2.165  | 2.155  |
| 229043_at    | <i>PAPD5</i>         | 11.06  | 9.39   | 9.49   |
| 224805_s_at  | <i>C15orf17</i>      | 2.86   | 2.46   | 2.42   |
| 235529_x_at  | <i>C20orf118</i>     | 10.82  | 9.29   | 9.19   |
| 222381_at    | <i>PDCD6</i>         | 3.93   | 3.36   | 3.34   |
| 236776_at    | <i>NA</i>            | 3.93   | 3.36   | 3.34   |
| 210507_s_at  | <i>AVIL</i>          | 3.475  | 2.975  | 2.965  |
| 243697_at    | <i>MOXD1</i>         | 2.99   | 2.56   | 2.54   |
| 207231_at    | <i>DZIP3</i>         | 3.775  | 3.215  | 3.225  |
| 1566844_at   | <i>PER4</i>          | 2.545  | 2.175  | 2.165  |
| 1553046_s_at | <i>GAL3ST2</i>       | 2.565  | 2.185  | 2.185  |
| 238313_at    | <i>NA</i>            | 3.085  | 2.625  | 2.635  |
| 1570015_at   | <i>RP11-165H20.1</i> | 2.58   | 2.2    | 2.2    |
| 240567_at    | <i>NA</i>            | 3.665  | 3.135  | 3.115  |
| 222766_at    | <i>POLR3K</i>        | 3.54   | 3.03   | 3.01   |
| 1561611_at   | <i>NA</i>            | 2.685  | 2.305  | 2.265  |
| 234727_at    | <i>DNAH7</i>         | 2.58   | 2.2    | 2.2    |
| 204858_s_at  | <i>ECGF1</i>         | 2.265  | 1.935  | 1.925  |
| 230792_at    | <i>FAAH2</i>         | 2.69   | 2.31   | 2.28   |
| 237080_at    | <i>SRGAP3</i>        | 3.56   | 3.04   | 3.04   |
| 1559629_at   | <i>TMEM132D</i>      | 3.07   | 2.65   | 2.61   |
| 203439_s_at  | <i>STC2</i>          | 11.995 | 10.145 | 10.355 |
| 219711_at    | <i>ZNF586</i>        | 2.685  | 2.285  | 2.295  |
| 1556422_at   | <i>ZFP28</i>         | 2.74   | 2.35   | 2.33   |
| 212230_at    | <i>PPAP2B</i>        | 13.48  | 11.55  | 11.48  |
| 228949_at    | <i>GPR177</i>        | 11.775 | 10.025 | 10.095 |
| 219934_s_at  | <i>SULT1E1</i>       | 3      | 2.57   | 2.56   |

|              |                 |       |       |       |
|--------------|-----------------|-------|-------|-------|
| 243091_at    | <i>CRYZL1</i>   | 5.51  | 4.68  | 4.74  |
| 201611_s_at  | <i>ICMT</i>     | 9.265 | 7.915 | 7.925 |
| 220505_at    | <i>C9orf53</i>  | 2.825 | 2.405 | 2.415 |
| 204397_at    | <i>EML2</i>     | 2.705 | 2.305 | 2.315 |
| 219674_s_at  | <i>PRO2900</i>  | 5.625 | 4.815 | 4.795 |
| 223359_s_at  | <i>PDE7A</i>    | 2.49  | 2.13  | 2.13  |
| 1555014_x_at | <i>NA</i>       | 4.635 | 3.985 | 3.935 |
| 220163_s_at  | <i>HR</i>       | 2.695 | 2.305 | 2.295 |
| 1554241_at   | <i>COCH</i>     | 13.38 | 11.54 | 11.34 |
| 222364_at    | <i>NA</i>       | 7.815 | 6.615 | 6.745 |
| 235955_at    | <i>MARVELD2</i> | 3.46  | 2.93  | 2.99  |
| 228352_at    | <i>UNC13D</i>   | 3.075 | 2.635 | 2.635 |
| 215587_x_at  | <i>BTBD14B</i>  | 3.885 | 3.325 | 3.325 |
| 235592_at    | <i>ELL2</i>     | 7.135 | 6.125 | 6.075 |
| 240795_at    | <i>NA</i>       | 2.8   | 2.4   | 2.39  |
| 234419_x_at  | <i>NA</i>       | 3.625 | 3.135 | 3.075 |
| 1556533_at   | <i>C17orf52</i> | 2.995 | 2.535 | 2.585 |
| 232235_at    | <i>DSEL</i>     | 12.55 | 10.8  | 10.66 |
| 221293_s_at  | <i>DEF6</i>     | 2.955 | 2.515 | 2.545 |
| 215383_x_at  | <i>SPG21</i>    | 7.07  | 6.06  | 6.04  |
| 1554922_at   | <i>ZNF678</i>   | 3.365 | 2.895 | 2.865 |
| 217374_x_at  | <i>TRGV5</i>    | 2.65  | 2.27  | 2.27  |
| 1569557_at   | <i>ZNF248</i>   | 3.235 | 2.795 | 2.745 |
| 202448_s_at  | <i>ZER1</i>     | 2.375 | 2.035 | 2.035 |
| 218373_at    | <i>AKTIP</i>    | 8.85  | 7.59  | 7.55  |
| 1569449_a_at | <i>CRSP2</i>    | 3.105 | 2.655 | 2.665 |
| 207099_s_at  | <i>CHM</i>      | 2.695 | 2.315 | 2.315 |
| 215354_s_at  | <i>PELP1</i>    | 6.275 | 5.345 | 5.395 |
| 242532_at    | <i>NA</i>       | 2.92  | 2.5   | 2.5   |
| 238638_at    | <i>SLC37A2</i>  | 5.275 | 4.545 | 4.485 |
| 231459_at    | <i>SMG6</i>     | 2.595 | 2.215 | 2.215 |

|              |                  |        |        |        |
|--------------|------------------|--------|--------|--------|
| 211516_at    | <i>IL5RA</i>     | 2.77   | 2.36   | 2.38   |
| 1559186_at   | <i>PRKXP1</i>    | 3.435  | 2.935  | 2.935  |
| 231448_at    | <i>Tenr</i>      | 2.91   | 2.51   | 2.47   |
| 1563821_at   | <i>LOC170425</i> | 2.855  | 2.445  | 2.435  |
| 212852_s_at  | <i>TROVE2</i>    | 13.59  | 11.65  | 11.61  |
| 236490_at    | <i>NA</i>        | 3.19   | 2.74   | 2.72   |
| 243912_x_at  | <i>APOBEC3F</i>  | 3.505  | 3.025  | 2.975  |
| 242681_at    | <i>CTNNBIP1</i>  | 3.095  | 2.665  | 2.635  |
| 1570593_at   | <i>NA</i>        | 3.575  | 3.085  | 3.035  |
| 239076_at    | <i>LOC441220</i> | 4.58   | 3.92   | 3.92   |
| 234232_at    | <i>KBTBD2</i>    | 3.095  | 2.645  | 2.655  |
| 226204_at    | <i>GNBIL</i>     | 9.3    | 7.9    | 8.02   |
| 225442_at    | <i>DDR2</i>      | 12.205 | 10.515 | 10.375 |
| 225118_at    | <i>SETD8</i>     | 6.755  | 5.805  | 5.755  |
| 1554712_a_at | <i>GLYATL2</i>   | 2.89   | 2.49   | 2.46   |
| 225869_s_at  | <i>UNC93B1</i>   | 2.735  | 2.355  | 2.325  |
| 242815_x_at  | <i>FRMD4A</i>    | 3.425  | 2.955  | 2.905  |
| 1562352_at   | <i>NA</i>        | 3.74   | 3.23   | 3.17   |
| 232502_at    | <i>FLJ34077</i>  | 4.155  | 3.575  | 3.535  |
| 1563840_at   | <i>EFTUD1</i>    | 3.07   | 2.65   | 2.61   |
| 228048_at    | <i>C10orf41</i>  | 2.935  | 2.515  | 2.505  |
| 1559901_s_at | <i>C21orf34</i>  | 3.165  | 2.705  | 2.715  |
| 213563_s_at  | <i>TUBGCP2</i>   | 5.095  | 4.375  | 4.345  |
| 201031_s_at  | <i>HNRPH1</i>    | 14.305 | 12.155 | 12.345 |
| 1565876_x_at | <i>SMG6</i>      | 3.36   | 2.88   | 2.88   |
| 1560119_at   | <i>LOC389634</i> | 3.545  | 3.045  | 3.035  |
| 219186_at    | <i>ZBTB7A</i>    | 4.45   | 3.84   | 3.78   |
| 1561990_at   | <i>LOC157931</i> | 2.325  | 1.985  | 1.985  |
| 216095_x_at  | <i>MTMRI</i>     | 9.685  | 8.255  | 8.345  |
| 230186_at    | <i>TMEM136</i>   | 2.92   | 2.5    | 2.5    |
| 210886_x_at  | <i>TP53API</i>   | 2.975  | 2.545  | 2.565  |

|              |                  |        |       |       |
|--------------|------------------|--------|-------|-------|
| 230174_at    | <i>LYPLAL1</i>   | 8.25   | 7.09  | 7.05  |
| 1560911_at   | <i>NA</i>        | 2.89   | 2.46  | 2.49  |
| 217706_at    | <i>LRRRC51</i>   | 3.715  | 3.185 | 3.175 |
| 239276_at    | <i>NA</i>        | 4.32   | 3.7   | 3.7   |
| 231198_at    | <i>CDK6</i>      | 2.745  | 2.355 | 2.345 |
| 232373_at    | <i>NOXA1</i>     | 2.81   | 2.41  | 2.4   |
| 243983_at    | <i>MCF2L</i>     | 3.44   | 2.95  | 2.94  |
| 219580_s at  | <i>TMC5</i>      | 3.175  | 2.725 | 2.715 |
| 223844_at    | <i>ADAMTS13</i>  | 2.79   | 2.4   | 2.38  |
| 234445_at    | <i>C6orf12</i>   | 3.54   | 3.06  | 3.02  |
| 200698_at    | <i>KDEL2</i>     | 13.44  | 11.51 | 11.53 |
| 1570022_at   | <i>C3orf1</i>    | 3.07   | 2.63  | 2.63  |
| 243616_at    | <i>NA</i>        | 3.195  | 2.745 | 2.725 |
| 239699_s at  | <i>PMS2L5</i>    | 4.46   | 3.82  | 3.83  |
| 220745_at    | <i>IL19</i>      | 2.39   | 2.05  | 2.05  |
| 236179_at    | <i>NA</i>        | 12.53  | 10.77 | 10.72 |
| 229886_at    | <i>C5orf34</i>   | 4.165  | 3.565 | 3.565 |
| 1562576_at   | <i>NA</i>        | 3.145  | 2.705 | 2.695 |
| 203255_at    | <i>FBXO11</i>    | 10.365 | 8.955 | 8.825 |
| 235175_at    | <i>GBP4</i>      | 3.275  | 2.815 | 2.815 |
| 239411_at    | <i>ZNF496</i>    | 2.765  | 2.365 | 2.365 |
| 216849_at    | <i>NA</i>        | 3.975  | 3.435 | 3.395 |
| 213753_x at  | <i>LOC642592</i> | 7.72   | 6.68  | 6.56  |
| 219249_s at  | <i>FKBP10</i>    | 2.64   | 2.26  | 2.27  |
| 1560463_at   | <i>NA</i>        | 2.51   | 2.15  | 2.15  |
| 205623_at    | <i>ALDH3A1</i>   | 2.915  | 2.495 | 2.495 |
| 236839_at    | <i>AUH</i>       | 3.84   | 3.3   | 3.29  |
| 204449_at    | <i>PDCL</i>      | 10.075 | 8.645 | 8.635 |
| 1552399_a at | <i>BRF1</i>      | 3.18   | 2.73  | 2.72  |
| 241043_at    | <i>ORC5L</i>     | 3.53   | 3.03  | 3.03  |
| 244242_at    | <i>NA</i>        | 2.85   | 2.45  | 2.45  |



|              |                  |        |       |       |
|--------------|------------------|--------|-------|-------|
| 231051_at    | <i>SLC16A9</i>   | 2.845  | 2.445 | 2.445 |
| 220104_at    | <i>ZC3HAV1</i>   | 3.07   | 2.63  | 2.64  |
| 206053_at    | <i>ZNF510</i>    | 3.84   | 3.3   | 3.29  |
| 208251_at    | <i>KCNC4</i>     | 2.56   | 2.2   | 2.2   |
| 239528_at    | <i>PROM2</i>     | 3.98   | 3.45  | 3.38  |
| 210577_at    | <i>CASR</i>      | 2.585  | 2.225 | 2.225 |
| 1561474_at   | <i>NA</i>        | 2.85   | 2.46  | 2.44  |
| 233321_x_at  | <i>LOC90834</i>  | 6.41   | 5.52  | 5.49  |
| 1566633_at   | <i>NA</i>        | 3.085  | 2.655 | 2.635 |
| 214490_at    | <i>ARSF</i>      | 2.605  | 2.245 | 2.235 |
| 217494_s_at  | <i>PTENP1</i>    | 2.98   | 2.55  | 2.57  |
| 221197_s_at  | <i>CHAT</i>      | 2.71   | 2.33  | 2.33  |
| 210864_x_at  | <i>HFE</i>       | 2.645  | 2.265 | 2.265 |
| 213219_at    | <i>ADCY2</i>     | 2.71   | 2.33  | 2.32  |
| 1565939_at   | <i>C5orf22</i>   | 3.67   | 3.17  | 3.14  |
| 1553813_s_at | <i>TLE6</i>      | 2.915  | 2.505 | 2.495 |
| 234888_at    | <i>CACHD1</i>    | 2.65   | 2.27  | 2.28  |
| 212217_at    | <i>PREPL</i>     | 8.39   | 7.2   | 7.21  |
| 208771_s_at  | <i>LTA4H</i>     | 10.695 | 9.235 | 9.145 |
| 1560207_at   | <i>LOC644660</i> | 3.195  | 2.755 | 2.725 |
| 241276_at    | <i>NA</i>        | 2.86   | 2.46  | 2.46  |
| 240644_at    | <i>NA</i>        | 2.745  | 2.365 | 2.355 |
| 1562853_x_at | <i>AGPAT3</i>    | 2.68   | 2.3   | 2.3   |
| 222180_at    | <i>YES1</i>      | 3.38   | 2.88  | 2.92  |
| 206506_s_at  | <i>SUPT3H</i>    | 3.505  | 3.015 | 3.005 |
| 214952_at    | <i>NCAM1</i>     | 2.785  | 2.395 | 2.385 |
| 1562573_at   | <i>CYP17A1</i>   | 3.855  | 3.325 | 3.305 |
| 220200_s_at  | <i>SETD8</i>     | 3.325  | 2.865 | 2.855 |
| 217383_at    | <i>PGK1</i>      | 2.85   | 2.45  | 2.45  |
| 1556553_at   | <i>SLC45A4</i>   | 2.795  | 2.405 | 2.395 |
| 1560937_at   | <i>RSU1</i>      | 3.41   | 2.92  | 2.94  |

|             |                  |        |        |        |
|-------------|------------------|--------|--------|--------|
| 216569_at   | <i>NA</i>        | 3.11   | 2.68   | 2.66   |
| 211410_x_at | <i>KIR2DL5A</i>  | 2.44   | 2.08   | 2.12   |
| 204854_at   | <i>LEPREL2</i>   | 3.735  | 3.235  | 3.195  |
| 1562260_at  | <i>BRE</i>       | 3.16   | 2.73   | 2.71   |
| 235718_at   | <i>SRL</i>       | 3.31   | 2.86   | 2.84   |
| 210046_s_at | <i>IDH2</i>      | 7.435  | 6.415  | 6.375  |
| 204777_s_at | <i>MAL</i>       | 2.73   | 2.35   | 2.35   |
| 201669_s_at | <i>MARCKS</i>    | 13.775 | 11.865 | 11.815 |
| 240393_at   | <i>AES</i>       | 2.445  | 2.105  | 2.095  |
| 200646_s_at | <i>NUCB1</i>     | 3.13   | 2.71   | 2.68   |
| 229697_at   | <i>HIRIP3</i>    | 3.27   | 2.83   | 2.79   |
| 218292_s_at | <i>PRKAG2</i>    | 3.515  | 3.025  | 3.015  |
| 206081_at   | <i>SLC24A1</i>   | 6.41   | 5.5    | 5.52   |
| 206908_s_at | <i>CLDN11</i>    | 2.27   | 1.95   | 1.95   |
| 225668_at   | <i>LOC134145</i> | 3.635  | 3.125  | 3.135  |
| 234346_x_at | <i>ITGB4BP</i>   | 3.365  | 2.885  | 2.895  |
| 236224_at   | <i>RIT1</i>      | 12.34  | 10.58  | 10.65  |
| 241581_at   | <i>ERBB4</i>     | 2.84   | 2.44   | 2.44   |
| 212410_at   | <i>EFHA1</i>     | 12.3   | 10.62  | 10.54  |
| 213565_s_at | <i>SMAD6</i>     | 5.615  | 4.835  | 4.825  |
| 232475_at   | <i>C15orf42</i>  | 2.71   | 2.33   | 2.33   |
| 235011_at   | <i>MAP3K2</i>    | 3.6    | 3.08   | 3.11   |
| 231616_at   | <i>GYPA</i>      | 3.335  | 2.875  | 2.865  |
| 225415_at   | <i>DTX3L</i>     | 7.59   | 6.52   | 6.54   |
| 215122_at   | <i>TBX6</i>      | 3.29   | 2.84   | 2.82   |
| 234789_at   | <i>NA</i>        | 3.58   | 3.09   | 3.07   |
| 210344_at   | <i>OSBPL7</i>    | 2.85   | 2.45   | 2.45   |
| 208340_at   | <i>CASP4</i>     | 3.065  | 2.645  | 2.635  |
| 228557_at   | <i>L3MBTL4</i>   | 2.9    | 2.5    | 2.49   |
| 218568_at   | <i>AGK</i>       | 9.36   | 8.07   | 8.04   |
| 218202_x_at | <i>MRPL44</i>    | 3.045  | 2.625  | 2.615  |

|              |                  |        |        |        |
|--------------|------------------|--------|--------|--------|
| 240081_at    | <i>MYO5C</i>     | 3.56   | 3.07   | 3.05   |
| 244323_at    | <i>BHLHB5</i>    | 3.545  | 3.075  | 3.025  |
| 1556826_s_at | <i>Clorf187</i>  | 3.635  | 3.155  | 3.105  |
| 225381_at    | <i>LOC399959</i> | 11.895 | 10.255 | 10.225 |
| 225885_at    | <i>EEA1</i>      | 11.345 | 9.815  | 9.725  |
| 216509_x_at  | <i>MLLT10</i>    | 3.16   | 2.71   | 2.74   |
| 1555749_at   | <i>SF1</i>       | 2.89   | 2.5    | 2.48   |
| 206936_x_at  | <i>NA</i>        | 7.315  | 6.265  | 6.335  |
| 242789_at    | <i>PDE1A</i>     | 2.825  | 2.445  | 2.415  |
| 238004_at    | <i>PGBD2</i>     | 4.525  | 3.915  | 3.885  |
| 222428_s_at  | <i>LARS</i>      | 12.215 | 10.555 | 10.475 |
| 206918_s_at  | <i>CPNE1</i>     | 8.06   | 7      | 6.89   |
| 215820_x_at  | <i>SNX13</i>     | 3.805  | 3.285  | 3.285  |
| 201407_s_at  | <i>PPP1CB</i>    | 11.775 | 10.095 | 10.215 |
| 228185_at    | <i>ZNF25</i>     | 8.925  | 7.625  | 7.755  |
| 232770_at    | <i>TUSC3</i>     | 2.89   | 2.5    | 2.48   |
| 234275_at    | <i>ESR1</i>      | 2.985  | 2.575  | 2.565  |
| 220845_at    | <i>ACOXL</i>     | 3.555  | 3.075  | 3.045  |
| 230553_at    | <i>PRDM15</i>    | 3.255  | 2.815  | 2.805  |
| 223635_s_at  | <i>SSBP3</i>     | 2.695  | 2.335  | 2.305  |
| 237532_at    | <i>TNFRSF8</i>   | 2.65   | 2.29   | 2.29   |
| 243939_at    | <i>NA</i>        | 2.585  | 2.225  | 2.235  |
| 231018_at    | <i>LOC342979</i> | 2.94   | 2.54   | 2.53   |
| 1569150_x_at | <i>PDLIM7</i>    | 2.8    | 2.41   | 2.42   |
| 230320_at    | <i>TBRG1</i>     | 8.845  | 7.695  | 7.555  |
| 216195_at    | <i>ANK2</i>      | 2.77   | 2.39   | 2.38   |
| 222679_s_at  | <i>DCUN1D1</i>   | 9.88   | 8.57   | 8.47   |
| 212762_s_at  | <i>TCF7L2</i>    | 9.215  | 7.985  | 7.925  |
| 236886_at    | <i>NINJ2</i>     | 2.95   | 2.55   | 2.54   |
| 243403_x_at  | <i>CPM</i>       | 3.19   | 2.77   | 2.73   |
| 1554706_at   | <i>OR2L13</i>    | 3.175  | 2.765  | 2.715  |

|              |                       |        |        |        |
|--------------|-----------------------|--------|--------|--------|
| 1569805_at   | <i>NA</i>             | 2.525  | 2.185  | 2.175  |
| 202602_s_at  | <i>HTATSF1</i>        | 11.9   | 10.23  | 10.3   |
| 236867_at    | <i>TRPV1</i>          | 4.5    | 3.88   | 3.88   |
| 221334_s_at  | <i>FOXP3</i>          | 4.1    | 3.56   | 3.52   |
| 228443_s_at  | <i>SETD8</i>          | 12.995 | 11.115 | 11.315 |
| 240836_at    | <i>RPL27</i>          | 3.26   | 2.79   | 2.84   |
| 207649_at    | <i>KRT37</i>          | 2.62   | 2.26   | 2.26   |
| 207019_s_at  | <i>AKAP4</i>          | 3.19   | 2.75   | 2.75   |
| 236556_s_at  | <i>LONRF1</i>         | 3.545  | 3.075  | 3.055  |
| 1563295_at   | <i>NA</i>             | 2.665  | 2.305  | 2.305  |
| 227317_at    | <i>LMCD1</i>          | 2.61   | 2.25   | 2.25   |
| 214293_at    | <i>11-Sep</i>         | 11.555 | 10.025 | 9.915  |
| 1560386_at   | <i>XPO1</i>           | 3.015  | 2.605  | 2.585  |
| 223281_s_at  | <i>COX15</i>          | 8.74   | 7.57   | 7.51   |
| 231584_s_at  | <i>NA</i>             | 3.185  | 2.745  | 2.745  |
| 1558938_at   | <i>C14orf122</i>      | 3.51   | 3.03   | 3.03   |
| 215860_at    | <i>SYT12</i>          | 4.035  | 3.495  | 3.455  |
| 203678_at    | <i>MTMR15</i>         | 7.335  | 6.295  | 6.375  |
| 214191_at    | <i>ICAI</i>           | 2.815  | 2.435  | 2.425  |
| 1563978_at   | <i>LOC339457</i>      | 3.705  | 3.215  | 3.185  |
| 216614_at    | <i>ITPR2</i>          | 3.125  | 2.705  | 2.695  |
| 237404_at    | <i>PEX14</i>          | 2.715  | 2.345  | 2.335  |
| 220894_x_at  | <i>PRDM12</i>         | 4.135  | 3.585  | 3.555  |
| 1563165_at   | <i>LOC152845</i>      | 2.915  | 2.515  | 2.515  |
| 230107_at    | <i>HMI3</i>           | 2.72   | 2.34   | 2.35   |
| 1554037_a_at | <i>ZBTB24</i>         | 3.35   | 2.87   | 2.91   |
| 204179_at    | <i>MB</i>             | 2.63   | 2.27   | 2.27   |
| 217802_s_at  | <i>NUCKS1</i>         | 14.295 | 12.335 | 12.345 |
| 205800_at    | <i>SLC3A1</i>         | 2.94   | 2.54   | 2.54   |
| 1553402_a_at | <i>HFE</i>            | 4.07   | 3.5    | 3.52   |
| 212327_at    | <i>DKFZP686A01247</i> | 10.52  | 9.17   | 8.99   |

|             |                 |        |        |        |
|-------------|-----------------|--------|--------|--------|
| 233174_at   | <i>NA</i>       | 3.115  | 2.685  | 2.705  |
| 232951_at   | <i>CMTM7</i>    | 4.585  | 3.945  | 3.975  |
| 213682_at   | <i>NUP50</i>    | 11.68  | 10.11  | 10.06  |
| 240328_at   | <i>GNAOI</i>    | 2.585  | 2.225  | 2.235  |
| 241159_x_at | <i>ITFGI</i>    | 4.415  | 3.835  | 3.795  |
| 222187_x_at | <i>G3BP1</i>    | 3.42   | 2.96   | 2.95   |
| 214495_at   | <i>CACNG2</i>   | 2.555  | 2.215  | 2.205  |
| 237218_at   | <i>CCBL2</i>    | 2.79   | 2.41   | 2.41   |
| 1553462_at  | <i>NA</i>       | 3.865  | 3.345  | 3.335  |
| 224936_at   | <i>EIF2S3</i>   | 12.32  | 10.74  | 10.54  |
| 209078_s_at | <i>TXN2</i>     | 2.555  | 2.215  | 2.215  |
| 217557_s_at | <i>CPM</i>      | 3.73   | 3.25   | 3.2    |
| 209074_s_at | <i>FAM107A</i>  | 2.92   | 2.52   | 2.52   |
| 200630_x_at | <i>SET</i>      | 11.755 | 10.195 | 10.115 |
| 244095_at   | <i>NA</i>       | 3.355  | 2.905  | 2.895  |
| 1559956_at  | <i>SYT7</i>     | 3.69   | 3.2    | 3.18   |
| 239475_at   | <i>ACPL2</i>    | 2.9    | 2.51   | 2.5    |
| 226038_at   | <i>LONRF1</i>   | 8.37   | 7.27   | 7.19   |
| 219890_at   | <i>CLEC5A</i>   | 2.535  | 2.195  | 2.195  |
| 214451_at   | <i>TFAP2B</i>   | 3.23   | 2.8    | 2.78   |
| 242993_at   | <i>PCK2</i>     | 3.27   | 2.82   | 2.84   |
| 236962_at   | <i>PTBP2</i>    | 3.05   | 2.64   | 2.63   |
| 1557094_at  | <i>NA</i>       | 3.595  | 3.125  | 3.095  |
| 229546_at   | <i>FAM84A</i>   | 3.275  | 2.825  | 2.835  |
| 242873_at   | <i>KLRK1</i>    | 2.77   | 2.39   | 2.39   |
| 203832_at   | <i>SNRPF</i>    | 8.025  | 6.915  | 6.965  |
| 208458_at   | <i>SCNN1D</i>   | 2.715  | 2.355  | 2.345  |
| 237977_at   | <i>NA</i>       | 4.225  | 3.675  | 3.625  |
| 224073_at   | <i>FLJ20464</i> | 2.785  | 2.415  | 2.405  |
| 232097_at   | <i>KIAA0737</i> | 8.32   | 7.13   | 7.26   |
| 236223_s_at | <i>RIT1</i>     | 10.495 | 8.995  | 9.155  |

|              |                       |        |       |       |
|--------------|-----------------------|--------|-------|-------|
| 231850_x_at  | <i>KIAA1712</i>       | 7.8    | 6.81  | 6.68  |
| 239382_at    | <i>HPS1</i>           | 2.95   | 2.55  | 2.55  |
| 1554864_a_at | <i>SDC3</i>           | 2.735  | 2.375 | 2.365 |
| 230160_x_at  | <i>DRAP1</i>          | 3.87   | 3.37  | 3.33  |
| 204579_at    | <i>FGFR4</i>          | 3.11   | 2.7   | 2.68  |
| 233016_at    | <i>NA</i>             | 3.15   | 2.74  | 2.71  |
| 238322_s_at  | <i>TEAD2</i>          | 3.11   | 2.7   | 2.68  |
| 1560963_a_at | <i>NA</i>             | 2.85   | 2.48  | 2.46  |
| 1561850_at   | <i>MGC15613</i>       | 2.69   | 2.33  | 2.32  |
| 209604_s_at  | <i>GATA3</i>          | 2.655  | 2.285 | 2.305 |
| 232740_at    | <i>MCM3APAS</i>       | 3.01   | 2.6   | 2.61  |
| 238723_at    | <i>ATXN3</i>          | 4.92   | 4.27  | 4.25  |
| 233836_at    | <i>TNRC6A</i>         | 2.8    | 2.42  | 2.42  |
| 1559029_at   | <i>LOC286154</i>      | 2.96   | 2.56  | 2.56  |
| 1552927_at   | <i>MAP3K7IP3</i>      | 3.73   | 3.25  | 3.21  |
| 200593_s_at  | <i>HNRPU</i>          | 10.99  | 9.55  | 9.48  |
| 203425_s_at  | <i>IGFBP5</i>         | 3.58   | 3.12  | 3.08  |
| 1561546_at   | <i>NA</i>             | 3.065  | 2.655 | 2.645 |
| 1564074_at   | <i>NA</i>             | 2.68   | 2.32  | 2.32  |
| 227504_s_at  | <i>KIAA1276</i>       | 4.265  | 3.715 | 3.665 |
| 229701_at    | <i>DNAJC9</i>         | 3.12   | 2.7   | 2.7   |
| 1569208_a_at | <i>DKFZP686A01247</i> | 3.945  | 3.445 | 3.395 |
| 215238_s_at  | <i>DOCK9</i>          | 2.8    | 2.43  | 2.41  |
| 1569668_at   | <i>NA</i>             | 3.005  | 2.595 | 2.605 |
| 238127_at    | <i>FLJ41484</i>       | 3.975  | 3.415 | 3.465 |
| 237262_at    | <i>NA</i>             | 2.55   | 2.21  | 2.21  |
| 206372_at    | <i>MYF6</i>           | 2.7    | 2.34  | 2.34  |
| 231101_at    | <i>PPP2R5E</i>        | 10.555 | 9.205 | 9.065 |
| 208400_at    | <i>GLP1R</i>          | 3.455  | 3.005 | 2.975 |
| 232631_at    | <i>CDH6</i>           | 2.49   | 2.15  | 2.15  |
| 210185_at    | <i>CACNBI</i>         | 3.69   | 3.2   | 3.19  |

|              |                  |        |        |        |
|--------------|------------------|--------|--------|--------|
| 237144_at    | <i>LTBP3</i>     | 3.78   | 3.29   | 3.26   |
| 202711_at    | <i>EFNB1</i>     | 2.84   | 2.46   | 2.46   |
| 1564385_at   | <i>LOC219688</i> | 2.93   | 2.54   | 2.53   |
| 229413_s_at  | <i>PCGF3</i>     | 4.5    | 3.9    | 3.9    |
| 1568600_at   | <i>CALML4</i>    | 2.89   | 2.53   | 2.48   |
| 208808_s_at  | <i>HMGB2</i>     | 13.065 | 11.365 | 11.285 |
| 237988_at    | <i>EIF1B</i>     | 3.345  | 2.915  | 2.885  |
| 212202_s_at  | <i>TMEM87A</i>   | 11.345 | 9.845  | 9.815  |
| 221295_at    | <i>CIDEA</i>     | 2.55   | 2.21   | 2.21   |
| 221871_s_at  | <i>TFG</i>       | 10.34  | 8.89   | 9.03   |
| 205153_s_at  | <i>CD40</i>      | 2.41   | 2.09   | 2.09   |
| 201405_s_at  | <i>COPS6</i>     | 10.715 | 9.215  | 9.365  |
| 217530_at    | <i>SLC34A1</i>   | 3.29   | 2.84   | 2.86   |
| 229301_at    | <i>TUG1</i>      | 3.45   | 2.99   | 2.99   |
| 243711_at    | <i>DDAH1</i>     | 3.6    | 3.13   | 3.11   |
| 237045_at    | <i>FAM91A1</i>   | 5.73   | 4.95   | 4.99   |
| 233031_at    | <i>ZEB2</i>      | 3.035  | 2.635  | 2.635  |
| 225799_at    | <i>LOC541471</i> | 10.53  | 9.05   | 9.21   |
| 204581_at    | <i>CD22</i>      | 3.045  | 2.645  | 2.635  |
| 216284_at    | <i>NA</i>        | 2.89   | 2.51   | 2.51   |
| 1558409_at   | <i>IMMP2L</i>    | 3.195  | 2.795  | 2.745  |
| 215205_x_at  | <i>NCOR2</i>     | 3.33   | 2.89   | 2.89   |
| 243448_at    | <i>NA</i>        | 3.205  | 2.795  | 2.765  |
| 226944_at    | <i>HTRA3</i>     | 6.18   | 5.4    | 5.32   |
| 234345_at    | <i>NA</i>        | 2.89   | 2.51   | 2.51   |
| 230490_x_at  | <i>RSU1</i>      | 12.285 | 10.655 | 10.645 |
| 1552509_a_at | <i>CD300LG</i>   | 2.585  | 2.245  | 2.245  |
| 240628_at    | <i>CADMI</i>     | 2.755  | 2.375  | 2.415  |
| 207650_x_at  | <i>PTGER1</i>    | 2.89   | 2.49   | 2.53   |
| 236605_at    | <i>EIF3S12</i>   | 3.255  | 2.825  | 2.815  |
| 236235_at    | <i>ITCH</i>      | 10.185 | 8.845  | 8.815  |

|              |                     |        |        |        |
|--------------|---------------------|--------|--------|--------|
| 242982_x_at  | <i>ITGB8</i>        | 2.825  | 2.445  | 2.445  |
| 1555034_at   | <i>CLRN1</i>        | 3.01   | 2.61   | 2.61   |
| 1558889_at   | <i>TTC28</i>        | 2.505  | 2.165  | 2.175  |
| 1553199_at   | <i>WDR21C</i>       | 3.825  | 3.335  | 3.305  |
| 214431_at    | <i>GMPS</i>         | 9.855  | 8.515  | 8.585  |
| 239213_at    | <i>SERPIN1</i>      | 2.515  | 2.185  | 2.175  |
| 1561607_at   | <i>NA</i>           | 2.75   | 2.39   | 2.39   |
| 219591_at    | <i>CEND1</i>        | 2.72   | 2.36   | 2.36   |
| 216695_s_at  | <i>TNKS</i>         | 2.91   | 2.53   | 2.52   |
| 226576_at    | <i>ARHGAP26</i>     | 2.82   | 2.45   | 2.43   |
| 226304_at    | <i>HSPB6</i>        | 3.165  | 2.745  | 2.745  |
| 213146_at    | <i>JMJD3</i>        | 3.515  | 3.055  | 3.045  |
| 243119_at    | <i>NUFIP2</i>       | 3.13   | 2.71   | 2.71   |
| 214282_at    | <i>CP</i>           | 3.16   | 2.75   | 2.73   |
| 1554133_at   | <i>RUFY2</i>        | 3.745  | 3.275  | 3.225  |
| 1560101_at   | <i>SYDE2</i>        | 4.06   | 3.49   | 3.55   |
| 236062_at    | <i>UBE2E1</i>       | 3.21   | 2.77   | 2.81   |
| 208557_at    | <i>HOXA6</i>        | 3.28   | 2.85   | 2.84   |
| 204408_at    | <i>APEX2</i>        | 3.275  | 2.835  | 2.845  |
| 1558956_s_at | <i>IFT80</i>        | 12.865 | 11.255 | 11.075 |
| 213965_s_at  | <i>CHD5</i>         | 3.085  | 2.685  | 2.675  |
| 216770_at    | <i>NA</i>           | 3.8    | 3.31   | 3.29   |
| 233355_at    | <i>PRR17</i>        | 3.21   | 2.79   | 2.79   |
| 232041_at    | <i>INADL</i>        | 2.43   | 2.11   | 2.11   |
| 237733_at    | <i>RP11-125A7.3</i> | 3.295  | 2.865  | 2.855  |
| 214170_x_at  | <i>FH</i>           | 10.435 | 9.055  | 9.055  |
| 216981_x_at  | <i>SPN</i>          | 2.47   | 2.15   | 2.14   |
| 212017_at    | <i>LOC130074</i>    | 11.825 | 10.335 | 10.205 |
| 215279_at    | <i>SVIL</i>         | 2.39   | 2.07   | 2.07   |
| 239979_at    | <i>EPSTH1</i>       | 2.835  | 2.465  | 2.455  |
| 206540_at    | <i>GLB1L</i>        | 3.35   | 2.92   | 2.9    |



|              |                 |       |       |       |
|--------------|-----------------|-------|-------|-------|
| 217459_at    | <i>NA</i>       | 2.8   | 2.44  | 2.43  |
| 203918_at    | <i>PCDHI</i>    | 6.235 | 5.455 | 5.375 |
| 201785_at    | <i>RNASE1</i>   | 2.865 | 2.485 | 2.485 |
| 1553957_at   | <i>ZNF564</i>   | 6.965 | 6.005 | 6.095 |
| 1570372_at   | <i>NA</i>       | 3.35  | 2.92  | 2.9   |
| 234096_at    | <i>PACRG</i>    | 3.105 | 2.705 | 2.705 |
| 241359_at    | <i>NA</i>       | 7.63  | 6.63  | 6.63  |
| 1553257_at   | <i>GAL3ST3</i>  | 2.84  | 2.47  | 2.46  |
| 1557402_at   | <i>NA</i>       | 2.85  | 2.48  | 2.46  |
| 244018_at    | <i>SLC2A9</i>   | 2.985 | 2.575 | 2.605 |
| 1562396_at   | <i>PP8961</i>   | 3.66  | 3.18  | 3.18  |
| 240792_at    | <i>NCOR2</i>    | 2.885 | 2.505 | 2.505 |
| 239924_at    | <i>LOC91316</i> | 3.35  | 2.92  | 2.9   |
| 223779_at    | <i>MGC10981</i> | 2.565 | 2.235 | 2.225 |
| 209927_s_at  | <i>C1orf77</i>  | 6.88  | 5.97  | 5.99  |
| 1557132_at   | <i>WDR17</i>    | 3.325 | 2.915 | 2.865 |
| 203473_at    | <i>SLCO2B1</i>  | 2.31  | 2.01  | 2.01  |
| 215165_x_at  | <i>UMPS</i>     | 8.43  | 7.37  | 7.29  |
| 220457_at    | <i>SAMD4B</i>   | 2.685 | 2.335 | 2.325 |
| 207561_s_at  | <i>ACCN3</i>    | 2.75  | 2.39  | 2.39  |
| 227447_at    | <i>SKIV2L2</i>  | 9.35  | 8.18  | 8.08  |
| 205517_at    | <i>GATA4</i>    | 3.105 | 2.715 | 2.695 |
| 208912_s_at  | <i>CNP</i>      | 9.985 | 8.745 | 8.615 |
| 231872_at    | <i>LRRCC1</i>   | 3     | 2.61  | 2.6   |
| 225005_at    | <i>PHF13</i>    | 9.48  | 8.17  | 8.31  |
| 207291_at    | <i>PRRG4</i>    | 2.965 | 2.585 | 2.575 |
| 226844_at    | <i>MOBKL2B</i>  | 2.6   | 2.27  | 2.25  |
| 1553906_s_at | <i>FGD2</i>     | 3.23  | 2.82  | 2.8   |
| 1561732_at   | <i>NA</i>       | 3.47  | 3.02  | 3     |
| 241066_at    | <i>ZNF449</i>   | 3.495 | 3.045 | 3.025 |
| 244637_at    | <i>NA</i>       | 2.865 | 2.505 | 2.475 |

|              |                     |        |       |       |
|--------------|---------------------|--------|-------|-------|
| 228030_at    | <i>RBM6</i>         | 12.81  | 11.1  | 11.19 |
| 237069_s_at  | <i>TRPM1</i>        | 2.685  | 2.335 | 2.345 |
| 220210_at    | <i>CHRNA10</i>      | 2.705  | 2.355 | 2.345 |
| 240767_x_at  | <i>VPSI3A</i>       | 2.81   | 2.46  | 2.44  |
| 224694_at    | <i>ANTXR1</i>       | 14.05  | 12.15 | 12.31 |
| 224748_at    | <i>WDR68</i>        | 9.42   | 8.23  | 8.17  |
| 228219_s_at  | <i>UPBI</i>         | 3.44   | 3.02  | 2.97  |
| 242247_at    | <i>METT5D1</i>      | 4      | 3.47  | 3.49  |
| 206750_at    | <i>MAFK</i>         | 2.565  | 2.225 | 2.225 |
| 217615_at    | <i>LRRC37A</i>      | 2.725  | 2.355 | 2.385 |
| 240821_at    | <i>NA</i>           | 3.6    | 3.15  | 3.13  |
| 234637_at    | <i>KRTAP4-5</i>     | 2.665  | 2.335 | 2.315 |
| 243306_s_at  | <i>GCCI</i>         | 3.26   | 2.85  | 2.83  |
| 1562446_at   | <i>RPI-153G14.3</i> | 2.8    | 2.44  | 2.44  |
| 215026_x_at  | <i>SCNNIA</i>       | 5.23   | 4.55  | 4.55  |
| 209977_at    | <i>PLG</i>          | 2.83   | 2.47  | 2.46  |
| 1570594_at   | <i>TMEM45B</i>      | 3.125  | 2.735 | 2.705 |
| 1565915_at   | <i>ZC3HAV1</i>      | 3.315  | 2.885 | 2.895 |
| 242845_at    | <i>NA</i>           | 3.1    | 2.71  | 2.7   |
| 1556636_at   | <i>NA</i>           | 3.355  | 2.925 | 2.915 |
| 226472_at    | <i>PPIL4</i>        | 8.285  | 7.185 | 7.255 |
| 215917_at    | <i>SNPH</i>         | 3.25   | 2.85  | 2.81  |
| 202029_x_at  | <i>RPL38</i>        | 14.04  | 12.13 | 12.35 |
| 218688_at    | <i>DAK</i>          | 2.83   | 2.47  | 2.46  |
| 228122_at    | <i>CCDC66</i>       | 5.01   | 4.37  | 4.37  |
| 1562010_x_at | <i>NA</i>           | 4.65   | 4.08  | 4.02  |
| 242494_at    | <i>PLCB1</i>        | 2.965  | 2.585 | 2.585 |
| 201657_at    | <i>ARL1</i>         | 9.5    | 8.24  | 8.32  |
| 230839_at    | <i>PRMT8</i>        | 2.445  | 2.145 | 2.115 |
| 1554171_at   | <i>ZMYM3</i>        | 10.375 | 8.965 | 9.115 |
| 214638_s_at  | <i>CCNT2</i>        | 5.33   | 4.68  | 4.62  |

|             |                 |        |        |        |
|-------------|-----------------|--------|--------|--------|
| 1556175_at  | <i>ABBA-1</i>   | 2.715  | 2.365  | 2.375  |
| 242427_at   | <i>WAC</i>      | 3.625  | 3.165  | 3.155  |
| 235514_at   | <i>SASP</i>     | 2.55   | 2.23   | 2.22   |
| 217509_x_at | <i>GRIK5</i>    | 5.985  | 5.255  | 5.185  |
| 218050_at   | <i>UFMI</i>     | 13.795 | 11.985 | 12.045 |
| 208953_at   | <i>LARP5</i>    | 8.695  | 7.575  | 7.575  |
| 228673_s_at | <i>EML4</i>     | 2.83   | 2.47   | 2.47   |
| 201602_s_at | <i>PPP1R12A</i> | 8.055  | 7.015  | 7.025  |
| 232084_at   | <i>SGTB</i>     | 3.055  | 2.665  | 2.655  |
| 207239_s_at | <i>PCTK1</i>    | 2.905  | 2.525  | 2.535  |
| 227064_at   | <i>ANKRD40</i>  | 11.465 | 10.065 | 9.935  |
| 216084_at   | <i>C9orf144</i> | 3.055  | 2.665  | 2.655  |
| 215924_at   | <i>DBC1</i>     | 3.12   | 2.73   | 2.71   |
| 217416_x_at | <i>NA</i>       | 3.25   | 2.83   | 2.83   |
| 213966_at   | <i>HMG20B</i>   | 3.15   | 2.74   | 2.76   |
| 208450_at   | <i>LGALS2</i>   | 2.595  | 2.265  | 2.255  |
| 205062_x_at | <i>ARID4A</i>   | 7.725  | 6.795  | 6.685  |
| 223802_s_at | <i>RBBP6</i>    | 5.695  | 4.965  | 4.975  |
| 229747_x_at | <i>MGC40489</i> | 2.31   | 2.01   | 2.01   |
| 201775_s_at | <i>ATPAF1</i>   | 4.785  | 4.145  | 4.195  |
| 243246_at   | <i>NAT12</i>    | 2.465  | 2.145  | 2.145  |
| 230315_at   | <i>KLF3</i>     | 2.77   | 2.41   | 2.41   |
| 219359_at   | <i>ATHL1</i>    | 4.37   | 3.79   | 3.83   |
| 228687_at   | <i>ZNF777</i>   | 2.51   | 2.19   | 2.19   |
| 218646_at   | <i>C4orf27</i>  | 11.63  | 10.13  | 10.17  |
| 242513_x_at | <i>KIAA2018</i> | 3.255  | 2.835  | 2.835  |
| 221117_at   | <i>NA</i>       | 2.98   | 2.6    | 2.6    |
| 228519_x_at | <i>CIRBP</i>    | 7.175  | 6.225  | 6.295  |
| 1561073_at  | <i>TRPS1</i>    | 3.96   | 3.46   | 3.46   |
| 202276_at   | <i>SHFM1</i>    | 11.96  | 10.4   | 10.47  |
| 179_at      | <i>PMS2L11</i>  | 2.135  | 1.855  | 1.865  |

|              |                  |        |        |        |
|--------------|------------------|--------|--------|--------|
| 204293_at    | <i>SGSH</i>      | 5.63   | 4.91   | 4.91   |
| 217662_x_at  | <i>BCAP29</i>    | 9.835  | 8.605  | 8.555  |
| 242125_at    | <i>CAPZA1</i>    | 2.72   | 2.38   | 2.38   |
| 232040_at    | <i>LOC157860</i> | 2.98   | 2.6    | 2.6    |
| 210063_at    | <i>SARDH</i>     | 3.11   | 2.73   | 2.7    |
| 205901_at    | <i>PNOC</i>      | 2.53   | 2.21   | 2.21   |
| 241718_x_at  | <i>KIAA0947</i>  | 5.005  | 4.385  | 4.355  |
| 211304_x_at  | <i>KCNJ5</i>     | 4.84   | 4.22   | 4.23   |
| 220266_s_at  | <i>KLF4</i>      | 2.885  | 2.535  | 2.505  |
| 214243_s_at  | <i>SERHL2</i>    | 2.675  | 2.345  | 2.325  |
| 1562433_at   | <i>FLJ10489</i>  | 2.585  | 2.265  | 2.255  |
| 230061_at    | <i>TM4SF18</i>   | 3.075  | 2.685  | 2.675  |
| 203168_at    | <i>CREBL1</i>    | 3.68   | 3.22   | 3.21   |
| 1553397_at   | <i>CCDC13</i>    | 3.805  | 3.325  | 3.315  |
| 1562955_at   | <i>WDFY1</i>     | 2.62   | 2.29   | 2.27   |
| 230071_at    | <i>11-Sep</i>    | 12.415 | 10.925 | 10.755 |
| 234169_at    | <i>NA</i>        | 3.63   | 3.18   | 3.16   |
| 215807_s_at  | <i>PLXNB1</i>    | 2.495  | 2.175  | 2.175  |
| 242454_at    | <i>AMBP</i>      | 3.095  | 2.695  | 2.695  |
| 1555704_at   | <i>CMTM3</i>     | 3.11   | 2.71   | 2.72   |
| 215244_at    | <i>DGCR5</i>     | 2.56   | 2.24   | 2.24   |
| 227026_at    | <i>HSMPP8</i>    | 9.235  | 8.135  | 7.985  |
| 1570345_at   | <i>C9orf27</i>   | 3.775  | 3.315  | 3.275  |
| 211054_at    | <i>INVS</i>      | 3.58   | 3.15   | 3.1    |
| 232608_x_at  | <i>CARD14</i>    | 3.245  | 2.835  | 2.825  |
| 1558820_a_at | <i>C18orf34</i>  | 2.33   | 2.03   | 2.04   |
| 1553872_at   | <i>MGC33894</i>  | 5.08   | 4.45   | 4.42   |
| 1561937_x_at | <i>NA</i>        | 2.37   | 2.07   | 2.07   |
| 206778_at    | <i>CRYBB2</i>    | 2.475  | 2.165  | 2.155  |
| 1559591_s_at | <i>CHDH</i>      | 3.615  | 3.155  | 3.165  |
| 205409_at    | <i>FOSL2</i>     | 2.58   | 2.26   | 2.25   |

|              |                     |        |        |        |
|--------------|---------------------|--------|--------|--------|
| 241097_at    | <i>RHOA</i>         | 3.13   | 2.74   | 2.72   |
| 232414_at    | <i>LGALS8</i>       | 2.735  | 2.395  | 2.395  |
| 238701_x_at  | <i>FLJ45803</i>     | 10.115 | 8.775  | 8.895  |
| 240595_at    | <i>NA</i>           | 4.88   | 4.28   | 4.24   |
| 1561132_at   | <i>DHX35</i>        | 2.68   | 2.34   | 2.34   |
| 238489_at    | <i>NA</i>           | 3.355  | 2.955  | 2.915  |
| 1557452_at   | <i>SSBP2</i>        | 2.72   | 2.38   | 2.38   |
| 216301_at    | <i>NA</i>           | 3.125  | 2.715  | 2.745  |
| 237599_at    | <i>ZNF30</i>        | 2.66   | 2.32   | 2.32   |
| 1556256_a_at | <i>APPBP1</i>       | 3.34   | 2.93   | 2.91   |
| 216160_at    | <i>NA</i>           | 2.775  | 2.435  | 2.425  |
| 243114_at    | <i>LOC648708</i>    | 2.57   | 2.25   | 2.25   |
| 1565746_at   | <i>ZNF724P</i>      | 3.005  | 2.635  | 2.625  |
| 203209_at    | <i>RFC5</i>         | 5.755  | 5.005  | 5.055  |
| 218792_s_at  | <i>BSPRY</i>        | 2.7    | 2.36   | 2.36   |
| 241835_at    | <i>NA</i>           | 3.235  | 2.855  | 2.815  |
| 228648_at    | <i>LRG1</i>         | 2.99   | 2.62   | 2.6    |
| 222184_at    | <i>NA</i>           | 4.395  | 3.845  | 3.835  |
| 1565911_at   | <i>NA</i>           | 3.395  | 2.975  | 2.975  |
| 207585_s_at  | <i>RPL36AL</i>      | 12.535 | 10.875 | 11.045 |
| 234347_s_at  | <i>DENR</i>         | 2.52   | 2.2    | 2.21   |
| 243405_at    | <i>TXNDC5</i>       | 8.635  | 7.515  | 7.585  |
| 1556938_a_at | <i>DYNLL1</i>       | 3.145  | 2.755  | 2.735  |
| 237889_s_at  | <i>LOC553137</i>    | 2.57   | 2.25   | 2.25   |
| 1554873_at   | <i>CSPP1</i>        | 3.47   | 3.05   | 3.01   |
| 226703_at    | <i>KIAA1787</i>     | 3.005  | 2.635  | 2.615  |
| 223426_s_at  | <i>EPB41L4B</i>     | 2.85   | 2.49   | 2.49   |
| 1556502_at   | <i>RP11-151A6.2</i> | 3.465  | 3.055  | 3.005  |
| 243971_x_at  | <i>LOC731789</i>    | 2.605  | 2.285  | 2.275  |
| 234879_at    | <i>NA</i>           | 2.615  | 2.285  | 2.295  |
| 232560_at    | <i>UROS</i>         | 2.55   | 2.23   | 2.23   |

|              |                  |        |        |        |
|--------------|------------------|--------|--------|--------|
| 1560596_at   | <i>GFPT1</i>     | 2.615  | 2.295  | 2.285  |
| 243958_at    | <i>NA</i>        | 3.57   | 3.11   | 3.14   |
| 230035_at    | <i>BOC</i>       | 5.045  | 4.415  | 4.405  |
| 230452_at    | <i>FLJ42351</i>  | 2.605  | 2.295  | 2.265  |
| 228831_s_at  | <i>GNG7</i>      | 4.075  | 3.555  | 3.585  |
| 228019_s_at  | <i>MRPS18C</i>   | 8.15   | 7.1    | 7.17   |
| 240893_at    | <i>FLJ22662</i>  | 2.7    | 2.36   | 2.36   |
| 230113_at    | <i>NA</i>        | 3.18   | 2.79   | 2.77   |
| 218263_s_at  | <i>ZBED5</i>     | 11.195 | 9.765  | 9.825  |
| 242537_at    | <i>ZMYND8</i>    | 3.18   | 2.79   | 2.78   |
| 1562456_at   | <i>NA</i>        | 2.745  | 2.405  | 2.405  |
| 228204_at    | <i>PSMB4</i>     | 13.965 | 12.285 | 12.165 |
| 1562935_at   | <i>NA</i>        | 2.89   | 2.54   | 2.52   |
| 1557569_at   | <i>MPDU1</i>     | 3.295  | 2.885  | 2.875  |
| 211497_x_at  | <i>NKX3-1</i>    | 2.535  | 2.225  | 2.205  |
| 206614_at    | <i>GDF5</i>      | 4.905  | 4.275  | 4.305  |
| 225187_at    | <i>KIAA1967</i>  | 4.545  | 3.985  | 3.975  |
| 223750_s_at  | <i>TLR10</i>     | 3.065  | 2.695  | 2.665  |
| 222161_at    | <i>NAALAD2</i>   | 3.17   | 2.78   | 2.77   |
| 244471_x_at  | <i>PANX2</i>     | 2.505  | 2.185  | 2.185  |
| 1563120_at   | <i>NA</i>        | 2.775  | 2.435  | 2.425  |
| 208944_at    | <i>TGFBR2</i>    | 12.125 | 10.665 | 10.575 |
| 233374_at    | <i>HIC2</i>      | 3.07   | 2.7    | 2.68   |
| 232088_x_at  | <i>NA</i>        | 3.675  | 3.205  | 3.235  |
| 222376_at    | <i>NA</i>        | 2.56   | 2.25   | 2.23   |
| 210135_s_at  | <i>SHOX2</i>     | 10.815 | 9.505  | 9.445  |
| 220878_at    | <i>NA</i>        | 2.75   | 2.41   | 2.41   |
| 205150_s_at  | <i>KIAA0644</i>  | 2.88   | 2.52   | 2.52   |
| 237556_at    | <i>LOC728804</i> | 3.825  | 3.355  | 3.335  |
| 1560477_a_at | <i>SAMD11</i>    | 2.22   | 1.94   | 1.94   |
| 1554834_a_at | <i>RASSF5</i>    | 2.505  | 2.195  | 2.185  |

|              |                 |        |        |        |
|--------------|-----------------|--------|--------|--------|
| 203248_at    | <i>ZNF24</i>    | 3.265  | 2.865  | 2.855  |
| 207221_at    | <i>F2RL3</i>    | 2.605  | 2.285  | 2.285  |
| 222219_s_at  | <i>TLE6</i>     | 2.93   | 2.57   | 2.57   |
| 221225_at    | <i>DKAKD</i>    | 3.475  | 3.035  | 3.045  |
| 1560974_s_at | <i>NOS1</i>     | 2.685  | 2.365  | 2.335  |
| 241605_at    | <i>TRUB1</i>    | 3.1    | 2.72   | 2.71   |
| 224458_at    | <i>C9orf125</i> | 6.44   | 5.68   | 5.6    |
| 226054_at    | <i>BRD4</i>     | 9.48   | 8.26   | 8.34   |
| 213511_s_at  | <i>MTMRI</i>    | 8.89   | 7.75   | 7.83   |
| 230712_at    | <i>NBPF1</i>    | 8.98   | 7.86   | 7.87   |
| 1554131_at   | <i>KIAA1128</i> | 3.815  | 3.325  | 3.355  |
| 212380_at    | <i>KIAA0082</i> | 3.34   | 2.91   | 2.93   |
| 203418_at    | <i>CCNA2</i>    | 2.59   | 2.27   | 2.27   |
| 241671_x_at  | <i>FLJ22536</i> | 3.45   | 3.05   | 3      |
| 1557595_at   | <i>GINS2</i>    | 6.585  | 5.755  | 5.775  |
| 207095_at    | <i>SLC10A2</i>  | 2.965  | 2.585  | 2.625  |
| 1562392_at   | <i>MRPL23</i>   | 2.54   | 2.23   | 2.22   |
| 237835_at    | <i>NA</i>       | 2.975  | 2.625  | 2.605  |
| 213350_at    | <i>RPS11</i>    | 15.945 | 13.895 | 14.045 |
| 229840_at    | <i>IQSEC2</i>   | 4.265  | 3.765  | 3.715  |
| 212821_at    | <i>SPTB</i>     | 2.805  | 2.465  | 2.465  |
| 1559915_at   | <i>NA</i>       | 3.37   | 2.95   | 2.96   |
| 1557136_at   | <i>ATP13A4</i>  | 3.315  | 2.925  | 2.895  |
| 242256_x_at  | <i>NA</i>       | 3.955  | 3.495  | 3.445  |
| 1561221_x_at | <i>ZDHHC20</i>  | 2.525  | 2.205  | 2.205  |
| 241925_x_at  | <i>NA</i>       | 2.97   | 2.61   | 2.61   |
| 239350_at    | <i>MARVELD3</i> | 2.705  | 2.365  | 2.375  |
| 1553094_at   | <i>TAC4</i>     | 2.94   | 2.58   | 2.57   |
| 1552427_at   | <i>ZNF485</i>   | 4.25   | 3.74   | 3.71   |
| 201614_s_at  | <i>RUVBL1</i>   | 6.84   | 6.05   | 5.95   |
| 233152_x_at  | <i>TNKS</i>     | 3.94   | 3.46   | 3.46   |

|             |                  |        |        |        |
|-------------|------------------|--------|--------|--------|
| 224570_s_at | <i>IRF2BP2</i>   | 12.455 | 10.825 | 11.005 |
| 237844_at   | <i>LOC644010</i> | 2.855  | 2.505  | 2.495  |
| 233532_x_at | <i>IFT52</i>     | 2.97   | 2.6    | 2.62   |
| 215574_at   | <i>NA</i>        | 2.95   | 2.59   | 2.59   |
| 237726_at   | <i>PLA2G6</i>    | 5.295  | 4.645  | 4.635  |
| 211396_at   | <i>FCGR2C</i>    | 2.895  | 2.535  | 2.535  |
| 226959_at   | <i>CAMK1D</i>    | 2.94   | 2.57   | 2.59   |
| 205124_at   | <i>MEF2B</i>     | 2.725  | 2.385  | 2.385  |
| 216186_at   | <i>C1orf21</i>   | 2.6    | 2.28   | 2.28   |
| 238639_x_at | <i>NA</i>        | 3.9    | 3.39   | 3.45   |
| 229625_at   | <i>GBP5</i>      | 2.895  | 2.525  | 2.545  |
| 212333_at   | <i>FAM98A</i>    | 12.71  | 11.22  | 11.08  |
| 230318_at   | <i>SERPINA1</i>  | 2.375  | 2.075  | 2.075  |
| 1569600_at  | <i>DLEU2</i>     | 3.515  | 3.105  | 3.055  |
| 235265_at   | <i>ZNF650</i>    | 2.495  | 2.195  | 2.185  |
| 221685_s_at | <i>CCDC99</i>    | 10.94  | 9.55   | 9.65   |
| 225784_s_at | <i>KIAA1166</i>  | 2.565  | 2.245  | 2.245  |
| 240124_at   | <i>NA</i>        | 2.63   | 2.31   | 2.31   |
| 234661_at   | <i>CCDC57</i>    | 2.25   | 1.97   | 1.97   |
| 226238_at   | <i>MCEE</i>      | 5.415  | 4.755  | 4.755  |
| 240676_at   | <i>NA</i>        | 3.6    | 3.14   | 3.18   |
| 219067_s_at | <i>NSMCE4A</i>   | 7.51   | 6.61   | 6.57   |
| 236082_at   | <i>PHLDB3</i>    | 2.715  | 2.385  | 2.375  |
| 204328_at   | <i>TMC6</i>      | 2.515  | 2.225  | 2.195  |
| 1554285_at  | <i>HAVCR2</i>    | 2.82   | 2.49   | 2.47   |
| 211473_s_at | <i>COL4A6</i>    | 2.555  | 2.235  | 2.245  |
| 221858_at   | <i>TBC1D12</i>   | 10.15  | 8.98   | 8.85   |
| 205986_at   | <i>AATK</i>      | 5.53   | 4.82   | 4.88   |
| 213160_at   | <i>DOCK2</i>     | 5.15   | 4.55   | 4.5    |
| 230125_at   | <i>GUSB</i>      | 3.33   | 2.94   | 2.92   |
| 240333_at   | <i>NA</i>        | 2.77   | 2.43   | 2.43   |



|              |                   |        |        |        |
|--------------|-------------------|--------|--------|--------|
| 228163_at    | <i>ST6GALNAC4</i> | 2.69   | 2.38   | 2.36   |
| 224198_at    | <i>ELAI</i>       | 2.365  | 2.085  | 2.075  |
| 206179_s_at  | <i>TPPP</i>       | 2.895  | 2.545  | 2.535  |
| 214141_x_at  | <i>SFRS7</i>      | 9.615  | 8.505  | 8.395  |
| 1556650_at   | <i>AUTS2</i>      | 3.11   | 2.73   | 2.73   |
| 1560987_a_at | <i>NA</i>         | 3.385  | 2.975  | 2.965  |
| 233053_at    | <i>PBI</i>        | 5.78   | 5.08   | 5.08   |
| 209371_s_at  | <i>SH3BP2</i>     | 2.425  | 2.125  | 2.125  |
| 209800_at    | <i>KRT16</i>      | 2.705  | 2.385  | 2.375  |
| 202624_s_at  | <i>CABIN1</i>     | 2.575  | 2.265  | 2.255  |
| 201949_x_at  | <i>CAPZB</i>      | 12.98  | 11.35  | 11.45  |
| 1553398_at   | <i>NA</i>         | 2.765  | 2.425  | 2.425  |
| 208354_s_at  | <i>SLC12A3</i>    | 2.32   | 2.04   | 2.04   |
| 230667_at    | <i>NA</i>         | 3.055  | 2.675  | 2.685  |
| 219188_s_at  | <i>LRP16</i>      | 4.1    | 3.61   | 3.59   |
| 89476_r_at   | <i>NPEPL1</i>     | 6.655  | 5.875  | 5.825  |
| 230990_at    | <i>KIF13A</i>     | 2.33   | 2.05   | 2.05   |
| 223996_s_at  | <i>MRPL30</i>     | 5.645  | 4.945  | 4.985  |
| 201133_s_at  | <i>PJA2</i>       | 12.56  | 11.1   | 10.98  |
| 209612_s_at  | <i>ADH1B</i>      | 2.7    | 2.37   | 2.38   |
| 231994_at    | <i>CHDH</i>       | 3.29   | 2.88   | 2.9    |
| 202848_s_at  | <i>GRK6</i>       | 2.8    | 2.46   | 2.46   |
| 219870_at    | <i>ATF7IP2</i>    | 3.295  | 2.895  | 2.895  |
| 229687_s_at  | <i>NA</i>         | 3.5    | 3.08   | 3.08   |
| 233063_s_at  | <i>NA</i>         | 2.885  | 2.545  | 2.535  |
| 1558533_at   | <i>KRBA2</i>      | 2.34   | 2.06   | 2.06   |
| 215609_at    | <i>STARD7</i>     | 6.185  | 5.435  | 5.445  |
| 227911_at    | <i>ARHGAP28</i>   | 2.81   | 2.47   | 2.47   |
| 37012_at     | <i>CAPZB</i>      | 12.455 | 10.975 | 10.925 |
| 1562886_at   | <i>NA</i>         | 3.37   | 2.98   | 2.95   |
| 1558620_at   | <i>ZNF621</i>     | 7.79   | 6.8    | 6.9    |

|             |                     |       |       |       |
|-------------|---------------------|-------|-------|-------|
| 224418_x_at | <i>PMCHL1</i>       | 2.385 | 2.105 | 2.105 |
| 215555_at   | <i>Clorf63</i>      | 3.175 | 2.805 | 2.785 |
| 217762_s_at | <i>RAB31</i>        | 14.39 | 12.73 | 12.57 |
| 239685_at   | <i>LOC283143</i>    | 2.755 | 2.415 | 2.415 |
| 236317_at   | <i>SETBP1</i>       | 2.795 | 2.475 | 2.445 |
| 242423_x_at | <i>NA</i>           | 2.925 | 2.565 | 2.575 |
| 205952_at   | <i>KCNK3</i>        | 2.725 | 2.405 | 2.395 |
| 215757_at   | <i>PRKDC</i>        | 3.395 | 2.995 | 2.985 |
| 243594_x_at | <i>SPIRE2</i>       | 3.455 | 3.045 | 3.035 |
| 1570048_at  | <i>DPH4</i>         | 3.2   | 2.8   | 2.84  |
| 211305_x_at | <i>FCAR</i>         | 2.855 | 2.515 | 2.515 |
| 204394_at   | <i>SLC43A1</i>      | 2.695 | 2.375 | 2.375 |
| 229571_at   | <i>CALM2</i>        | 5.185 | 4.535 | 4.585 |
| 229602_at   | <i>NA</i>           | 5.595 | 4.905 | 4.935 |
| 240127_at   | <i>FAM92A1</i>      | 3.105 | 2.745 | 2.715 |
| 224276_at   | <i>ZNF33A</i>       | 2.84  | 2.5   | 2.5   |
| 235088_at   | <i>LOC201725</i>    | 7.2   | 6.38  | 6.29  |
| 236522_at   | <i>NFIA</i>         | 2.64  | 2.33  | 2.31  |
| 1552917_at  | <i>IL29</i>         | 2.52  | 2.22  | 2.22  |
| 224425_x_at | <i>LOC440888</i>    | 2.64  | 2.32  | 2.32  |
| 216384_x_at | <i>LOC643287</i>    | 9.755 | 8.585 | 8.575 |
| 215773_x_at | <i>PARP2</i>        | 5.17  | 4.53  | 4.57  |
| 223921_s_at | <i>GBA2</i>         | 2.99  | 2.63  | 2.64  |
| 217341_at   | <i>DNMI</i>         | 3.065 | 2.705 | 2.695 |
| 227647_at   | <i>KCNE3</i>        | 2.775 | 2.435 | 2.435 |
| 243705_at   | <i>DDHD1</i>        | 3.265 | 2.895 | 2.845 |
| 1556365_at  | <i>RP3-398D13.1</i> | 2.595 | 2.275 | 2.285 |
| 241945_at   | <i>ALS2CR13</i>     | 3.19  | 2.81  | 2.81  |
| 227660_at   | <i>ANTXR1</i>       | 8.03  | 7.06  | 7.07  |
| 1565856_at  | <i>NA</i>           | 3.15  | 2.79  | 2.76  |
| 235991_at   | <i>LOC606495</i>    | 3.285 | 2.895 | 2.875 |

|              |                  |       |       |       |
|--------------|------------------|-------|-------|-------|
| 240379_at    | <i>PKP4</i>      | 2.7   | 2.38  | 2.38  |
| 236845_at    | <i>TRIM62</i>    | 2.99  | 2.63  | 2.63  |
| 236709_at    | <i>NA</i>        | 2.82  | 2.48  | 2.48  |
| 214197_s_at  | <i>SETDB1</i>    | 3.355 | 2.975 | 2.935 |
| 239147_at    | <i>ARSK</i>      | 6.425 | 5.655 | 5.665 |
| 239333_x_at  | <i>NA</i>        | 7.585 | 6.715 | 6.645 |
| 217287_s_at  | <i>TRPC6</i>     | 2.545 | 2.245 | 2.245 |
| 1553234_at   | <i>ADAMTS18</i>  | 3.04  | 2.69  | 2.66  |
| 224433_s_at  | <i>DDX54</i>     | 4.465 | 3.925 | 3.925 |
| 221155_x_at  | <i>NA</i>        | 3.645 | 3.195 | 3.225 |
| 1562582_at   | <i>LOC646405</i> | 3.58  | 3.18  | 3.13  |
| 243288_at    | <i>SMYD2</i>     | 2.82  | 2.49  | 2.48  |
| 217177_s_at  | <i>NA</i>        | 3.115 | 2.745 | 2.735 |
| 207927_at    | <i>HTR7</i>      | 3.595 | 3.175 | 3.165 |
| 211225_at    | <i>FUT5</i>      | 5.07  | 4.47  | 4.47  |
| 1555748_x_at | <i>CD79B</i>     | 2.955 | 2.605 | 2.595 |
| 216390_at    | <i>LCAT</i>      | 2.285 | 2.005 | 2.005 |
| 231084_at    | <i>C10orf79</i>  | 2.985 | 2.635 | 2.625 |
| 1554683_a_at | <i>MGC50722</i>  | 3.145 | 2.765 | 2.765 |
| 223814_at    | <i>TRNT1</i>     | 6.285 | 5.585 | 5.505 |
| 220353_at    | <i>FAM86C</i>    | 2.69  | 2.37  | 2.37  |
| 1553352_x_at | <i>ERVWE1</i>    | 2.98  | 2.62  | 2.63  |
| 225717_at    | <i>KIAA1715</i>  | 8.995 | 7.925 | 7.935 |
| 215855_s_at  | <i>TMFI</i>      | 3.69  | 3.26  | 3.24  |
| 239844_x_at  | <i>MGC33556</i>  | 3.075 | 2.725 | 2.695 |
| 215109_at    | <i>RC3H1</i>     | 3.135 | 2.755 | 2.765 |
| 1570130_at   | <i>SPATS2</i>    | 3.16  | 2.79  | 2.78  |
| 1560353_at   | <i>FOXP1</i>     | 2.965 | 2.615 | 2.595 |
| 1566096_x_at | <i>ARHGEF12</i>  | 4.08  | 3.63  | 3.57  |
| 232681_at    | <i>NA</i>        | 6.96  | 6.13  | 6.14  |
| 242350_s_at  | <i>ST8SLA6</i>   | 2.795 | 2.465 | 2.455 |

|              |                  |       |       |       |
|--------------|------------------|-------|-------|-------|
| 230118_at    | <i>NA</i>        | 2.64  | 2.32  | 2.33  |
| 240023_at    | <i>NA</i>        | 2.425 | 2.135 | 2.145 |
| 232016_at    | <i>MTMR15</i>    | 3.425 | 3.025 | 3.025 |
| 241947_at    | <i>FAM113B</i>   | 2.765 | 2.445 | 2.435 |
| 244639_at    | <i>TMBIM4</i>    | 3.425 | 3.035 | 3.015 |
| 208201_at    | <i>DUX2</i>      | 2.84  | 2.51  | 2.5   |
| 222097_at    | <i>MZF1</i>      | 2.925 | 2.595 | 2.575 |
| 232359_at    | <i>RDH11</i>     | 3.5   | 3.1   | 3.07  |
| 200780_x_at  | <i>GNAS</i>      | 13.32 | 11.68 | 11.81 |
| 226846_at    | <i>PHYHD1</i>    | 3.56  | 3.12  | 3.16  |
| 216883_x_at  | <i>PDE6D</i>     | 4.165 | 3.645 | 3.695 |
| 220967_s_at  | <i>ZNF696</i>    | 3.35  | 2.93  | 2.97  |
| 225466_at    | <i>FLJ36874</i>  | 7.885 | 6.945 | 6.955 |
| 237309_at    | <i>FBXO4</i>     | 3.55  | 3.12  | 3.14  |
| 1569592_a_at | <i>F11</i>       | 3.415 | 3.035 | 2.995 |
| 219562_at    | <i>RAB26</i>     | 2.435 | 2.155 | 2.155 |
| 234350_at    | <i>NA</i>        | 3.72  | 3.29  | 3.27  |
| 237874_at    | <i>RNF150</i>    | 3.015 | 2.665 | 2.655 |
| 1555844_s_at | <i>HNRPM</i>     | 14.77 | 13.07 | 12.99 |
| 234584_s_at  | <i>ATE1</i>      | 5.9   | 5.16  | 5.24  |
| 230654_at    | <i>NA</i>        | 3.2   | 2.83  | 2.81  |
| 239604_at    | <i>RBMS3</i>     | 3.04  | 2.68  | 2.68  |
| 219472_at    | <i>CENPO</i>     | 3.79  | 3.34  | 3.36  |
| 243758_at    | <i>CCDC37</i>    | 3.315 | 2.935 | 2.905 |
| 221032_s_at  | <i>TMPRSS5</i>   | 2.745 | 2.425 | 2.425 |
| 206781_at    | <i>DNAJC4</i>    | 3.41  | 3.02  | 3     |
| 230921_s_at  | <i>NA</i>        | 9.1   | 7.97  | 8.08  |
| 243825_at    | <i>NA</i>        | 4.56  | 4.02  | 4.02  |
| 209359_x_at  | <i>RUNX1</i>     | 4.295 | 3.795 | 3.795 |
| 236409_at    | <i>LYPLAL1</i>   | 2.835 | 2.505 | 2.495 |
| 1563867_at   | <i>LOC283194</i> | 2.455 | 2.175 | 2.165 |

|              |                 |        |        |        |
|--------------|-----------------|--------|--------|--------|
| 207127_s_at  | <i>HNRPH3</i>   | 12.05  | 10.56  | 10.7   |
| 239312_at    | <i>NA</i>       | 2.89   | 2.57   | 2.53   |
| 220464_at    | <i>MCF2L</i>    | 3.38   | 2.99   | 2.97   |
| 209079_x_at  | <i>PCDHGA1</i>  | 8.225  | 7.285  | 7.235  |
| 212652_s_at  | <i>SNX4</i>     | 9.5    | 8.32   | 8.44   |
| 228588_s_at  | <i>UBE2B</i>    | 13.525 | 11.915 | 11.965 |
| 1559149_at   | <i>NA</i>       | 2.77   | 2.45   | 2.45   |
| 212981_s_at  | <i>KIAA0738</i> | 13.3   | 11.65  | 11.83  |
| 1553809_a_at | <i>C9orf71</i>  | 2.615  | 2.325  | 2.295  |
| 231575_at    | <i>EGR4</i>     | 2.645  | 2.335  | 2.325  |
| 227680_at    | <i>ZNF326</i>   | 10.2   | 8.98   | 9.03   |
| 1561240_at   | <i>NA</i>       | 3.41   | 3.01   | 3.01   |
| 201603_at    | <i>PPP1R12A</i> | 13.925 | 12.245 | 12.335 |
| 204467_s_at  | <i>SNCA</i>     | 3.42   | 3.02   | 3.02   |
| 227950_at    | <i>UBE2H</i>    | 2.55   | 2.26   | 2.24   |
| 224778_s_at  | <i>NA</i>       | 12.925 | 11.315 | 11.495 |
| 230324_at    | <i>NCOA2</i>    | 3.655  | 3.215  | 3.245  |
| 213584_s_at  | <i>CREBZF</i>   | 2.88   | 2.53   | 2.55   |
| 231797_at    | <i>SIX4</i>     | 3.125  | 2.775  | 2.745  |
| 202294_at    | <i>STAG1</i>    | 8.935  | 7.845  | 7.945  |
| 200981_x_at  | <i>GNAS</i>     | 13.06  | 11.48  | 11.59  |
| 1561190_at   | <i>CDKL3</i>    | 3.905  | 3.475  | 3.425  |
| 222684_s_at  | <i>NOL10</i>    | 6.44   | 5.66   | 5.71   |
| 1555468_at   | <i>NRP2</i>     | 2.945  | 2.605  | 2.605  |
| 226002_at    | <i>GAB1</i>     | 3.225  | 2.865  | 2.825  |
| 241913_at    | <i>KLHL8</i>    | 3.1    | 2.74   | 2.74   |
| 1560803_at   | <i>DNAH3</i>    | 2.78   | 2.47   | 2.44   |
| 205849_s_at  | <i>UQCRB</i>    | 12.87  | 11.46  | 11.28  |
| 1553229_at   | <i>ZNF572</i>   | 2.89   | 2.55   | 2.55   |
| 242119_at    | <i>PROX1</i>    | 2.465  | 2.175  | 2.185  |
| 212237_at    | <i>ASXL1</i>    | 8.875  | 7.885  | 7.795  |

|              |                      |        |        |        |
|--------------|----------------------|--------|--------|--------|
| 213402_at    | <i>ZNF787</i>        | 2.68   | 2.35   | 2.38   |
| 243811_at    | <i>NA</i>            | 3.155  | 2.815  | 2.775  |
| 207257_at    | <i>EPO</i>           | 3.145  | 2.785  | 2.775  |
| 230556_at    | <i>IMMP1L</i>        | 3.32   | 2.95   | 2.93   |
| 1553857_at   | <i>IGSF22</i>        | 3.565  | 3.145  | 3.145  |
| 238460_at    | <i>FAM83A</i>        | 2.815  | 2.485  | 2.495  |
| 1555429_at   | <i>NA</i>            | 2.7    | 2.38   | 2.38   |
| 202820_at    | <i>AHR</i>           | 9.405  | 8.365  | 8.245  |
| 237707_at    | <i>FLJ20105</i>      | 2.375  | 2.095  | 2.095  |
| 214309_s_at  | <i>C21orf2</i>       | 2.155  | 1.895  | 1.905  |
| 213236_at    | <i>SASH1</i>         | 6.945  | 6.175  | 6.115  |
| 1552377_s_at | <i>FAM18B2</i>       | 3.165  | 2.805  | 2.795  |
| 236587_at    | <i>NA</i>            | 3.29   | 2.92   | 2.9    |
| 1553499_s_at | <i>SERPINA9</i>      | 3.58   | 3.16   | 3.16   |
| 216142_at    | <i>CALML4</i>        | 3.905  | 3.465  | 3.435  |
| 212636_at    | <i>OKI</i>           | 12.185 | 10.845 | 10.695 |
| 211858_x_at  | <i>GNAS</i>          | 12.465 | 11.025 | 11.015 |
| 242420_at    | <i>PPP1R9A</i>       | 3.16   | 2.81   | 2.78   |
| 1556672_a_at | <i>RBM6</i>          | 3.035  | 2.685  | 2.675  |
| 207470_at    | <i>DKFZp566H0824</i> | 2.78   | 2.46   | 2.46   |
| 1563894_at   | <i>LOC441178</i>     | 2.335  | 2.065  | 2.055  |
| 224566_at    | <i>TncRNA</i>        | 13.375 | 11.725 | 11.915 |
| 235540_at    | <i>GNRH1</i>         | 2.59   | 2.29   | 2.29   |
| 225775_at    | <i>TSPAN33</i>       | 3.045  | 2.685  | 2.685  |
| 219748_at    | <i>TREML2</i>        | 2.405  | 2.125  | 2.125  |
| 218600_at    | <i>LIMD2</i>         | 2.845  | 2.525  | 2.515  |
| 237135_at    | <i>NA</i>            | 2.735  | 2.415  | 2.415  |
| 217264_s_at  | <i>SCNN1A</i>        | 8.08   | 7.16   | 7.12   |
| 236784_s_at  | <i>APTX</i>          | 3.035  | 2.695  | 2.665  |
| 203269_at    | <i>NSMAF</i>         | 12.455 | 11.105 | 10.925 |
| 1555894_s_at | <i>ABBA-1</i>        | 2.985  | 2.645  | 2.645  |

|              |                  |       |       |       |
|--------------|------------------|-------|-------|-------|
| 213719_s_at  | <i>SMARCA4</i>   | 2.615 | 2.325 | 2.305 |
| 219769_at    | <i>INCENP</i>    | 2.365 | 2.085 | 2.085 |
| 201069_at    | <i>MMP2</i>      | 11.35 | 10.07 | 10    |
| 203517_at    | <i>MTX2</i>      | 8.015 | 7.045 | 7.135 |
| 237554_at    | <i>ACVR1</i>     | 3.205 | 2.815 | 2.845 |
| 212317_at    | <i>TNPO3</i>     | 9.945 | 8.845 | 8.735 |
| 1552455_at   | <i>PRUNE2</i>    | 2.745 | 2.435 | 2.425 |
| 244848_at    | <i>CHDIL</i>     | 3.005 | 2.665 | 2.655 |
| 216894_x_at  | <i>CDKN1C</i>    | 2.76  | 2.44  | 2.44  |
| 235524_at    | <i>GARNL1</i>    | 2.605 | 2.305 | 2.305 |
| 242994_at    | <i>NRD1</i>      | 2.545 | 2.255 | 2.245 |
| 204252_at    | <i>CDK2</i>      | 7.17  | 6.32  | 6.37  |
| 231328_s_at  | <i>FAM98C</i>    | 2.675 | 2.375 | 2.365 |
| 208888_s_at  | <i>NCOR2</i>     | 2.43  | 2.15  | 2.15  |
| 207115_x_at  | <i>MBTD1</i>     | 3.47  | 3.08  | 3.06  |
| 242315_at    | <i>XYLT1</i>     | 2.735 | 2.425 | 2.415 |
| 1554940_a_at | <i>LOC388882</i> | 2.465 | 2.185 | 2.185 |
| 216828_at    | <i>NA</i>        | 2.97  | 2.62  | 2.63  |
| 230216_at    | <i>C12orf51</i>  | 2.475 | 2.195 | 2.195 |
| 1562772_a_at | <i>DAND5</i>     | 3.24  | 2.86  | 2.87  |
| 233745_at    | <i>PTOV1</i>     | 2.725 | 2.415 | 2.395 |
| 228199_at    | <i>LOC729234</i> | 2.665 | 2.375 | 2.355 |
| 203118_at    | <i>PCSK7</i>     | 8.105 | 7.195 | 7.145 |
| 1563210_at   | <i>ERBB2IP</i>   | 3.44  | 3.06  | 3.02  |
| 225302_at    | <i>TXNDC10</i>   | 11.78 | 10.35 | 10.5  |
| 1560940_at   | <i>NA</i>        | 3.605 | 3.215 | 3.165 |
| 209529_at    | <i>PPAP2C</i>    | 2.325 | 2.065 | 2.065 |
| 243430_at    | <i>SEZ6</i>      | 3.055 | 2.705 | 2.695 |
| 1561919_at   | <i>C14orf101</i> | 3.26  | 2.9   | 2.86  |
| 211704_s_at  | <i>SPIN2B</i>    | 6.09  | 5.4   | 5.38  |
| 1564802_at   | <i>NA</i>        | 3.055 | 2.705 | 2.695 |

|              |                 |        |        |        |
|--------------|-----------------|--------|--------|--------|
| 212876_at    | <i>B4GALT4</i>  | 10.405 | 9.265  | 9.155  |
| 212603_at    | <i>MRPS31</i>   | 9.94   | 8.78   | 8.82   |
| 1556125_at   | <i>GPATCH2</i>  | 2.675  | 2.375  | 2.375  |
| 240727_s_at  | <i>NA</i>       | 3.12   | 2.76   | 2.76   |
| 240705_at    | <i>CYP19A1</i>  | 3.145  | 2.805  | 2.765  |
| 206731_at    | <i>CNKS2</i>    | 2.825  | 2.505  | 2.495  |
| 232260_at    | <i>NA</i>       | 2.79   | 2.46   | 2.48   |
| 202524_s_at  | <i>SPOCK2</i>   | 2.535  | 2.245  | 2.235  |
| 215626_at    | <i>DOCK9</i>    | 3.17   | 2.81   | 2.8    |
| 211894_x_at  | <i>SEZ6L</i>    | 2.45   | 2.17   | 2.17   |
| 212273_x_at  | <i>GNAS</i>     | 13.13  | 11.6   | 11.65  |
| 238522_at    | <i>USP54</i>    | 2.565  | 2.275  | 2.265  |
| 208753_s_at  | <i>NAP1L1</i>   | 11.985 | 10.555 | 10.665 |
| 201386_s_at  | <i>DHX15</i>    | 10.475 | 9.245  | 9.305  |
| 230628_at    | <i>EP400</i>    | 2.77   | 2.46   | 2.45   |
| 207517_at    | <i>LAMC2</i>    | 3.31   | 2.95   | 2.91   |
| 229118_at    | <i>NA</i>       | 2.81   | 2.5    | 2.48   |
| 216463_at    | <i>NA</i>       | 3.345  | 2.985  | 2.945  |
| 234187_at    | <i>NA</i>       | 2.425  | 2.145  | 2.145  |
| 1562944_at   | <i>NA</i>       | 2.65   | 2.34   | 2.35   |
| 212125_at    | <i>RANGAP1</i>  | 2.28   | 2.02   | 2.02   |
| 214190_x_at  | <i>GGA2</i>     | 2.735  | 2.425  | 2.415  |
| 241095_at    | <i>NA</i>       | 2.575  | 2.275  | 2.285  |
| 234881_at    | <i>NA</i>       | 6.245  | 5.545  | 5.505  |
| 232990_at    | <i>FAM104B</i>  | 3.285  | 2.905  | 2.915  |
| 211571_s_at  | <i>VCAN</i>     | 8.2    | 7.26   | 7.26   |
| 1569796_s_at | <i>ATRNL1</i>   | 2.82   | 2.48   | 2.51   |
| 1553887_at   | <i>FLJ40235</i> | 2.645  | 2.345  | 2.345  |
| 227947_at    | <i>PHACTR2</i>  | 12.225 | 10.805 | 10.845 |
| 224887_at    | <i>GNPTG</i>    | 7.325  | 6.445  | 6.535  |
| 201496_x_at  | <i>MYH11</i>    | 2.715  | 2.395  | 2.425  |



|              |                  |        |        |        |
|--------------|------------------|--------|--------|--------|
| 1553011_at   | <i>TAF1L</i>     | 3.435  | 3.015  | 3.065  |
| 239611_at    | <i>NPAS3</i>     | 2.63   | 2.33   | 2.33   |
| 242104_at    | <i>NA</i>        | 3.17   | 2.81   | 2.81   |
| 213357_at    | <i>GTF2H5</i>    | 9.745  | 8.675  | 8.605  |
| 202377_at    | <i>LEPR</i>      | 11.855 | 10.445 | 10.575 |
| 214951_at    | <i>SLC26A10</i>  | 2.585  | 2.295  | 2.285  |
| 228853_at    | <i>STYX</i>      | 9.98   | 8.79   | 8.89   |
| 203034_s at  | <i>RPL27A</i>    | 12.12  | 10.67  | 10.81  |
| 202809_s at  | <i>INTS3</i>     | 8.5    | 7.48   | 7.59   |
| 208014_x at  | <i>AD7C-NTP</i>  | 2.64   | 2.34   | 2.34   |
| 239753_at    | <i>LOC441383</i> | 5.345  | 4.765  | 4.725  |
| 235646_at    | <i>PIP5K1A</i>   | 2.795  | 2.475  | 2.475  |
| 237026_at    | <i>SORBS1</i>    | 2.575  | 2.275  | 2.275  |
| 223965_at    | <i>TRSPAP1</i>   | 2.81   | 2.5    | 2.48   |
| 244182_at    | <i>NA</i>        | 5.855  | 5.175  | 5.215  |
| 219036_at    | <i>CEP70</i>     | 3.23   | 2.85   | 2.88   |
| 207025_at    | <i>GJAI2</i>     | 3.25   | 2.89   | 2.88   |
| 209785_s at  | <i>PLA2G4C</i>   | 7.115  | 6.265  | 6.355  |
| 215486_at    | <i>PRPS1L1</i>   | 3      | 2.68   | 2.65   |
| 213475_s at  | <i>ITGAL</i>     | 3      | 2.66   | 2.66   |
| 220500_s at  | <i>RABL2A</i>    | 3.38   | 3.01   | 2.98   |
| 204057_at    | <i>IRF8</i>      | 3.33   | 2.95   | 2.95   |
| 234649_at    | <i>POU2F1</i>    | 2.5    | 2.22   | 2.22   |
| 216043_x at  | <i>RAB11FIP3</i> | 2.95   | 2.6    | 2.62   |
| 240285_at    | <i>AQP2</i>      | 3.285  | 2.925  | 2.895  |
| 211837_s at  | <i>PTCRA</i>     | 2.84   | 2.52   | 2.52   |
| 202074_s at  | <i>OPTN</i>      | 10.78  | 9.57   | 9.55   |
| 200013_at    | <i>RPL24</i>     | 13.905 | 12.365 | 12.295 |
| 1553793_a at | <i>KIAA1109</i>  | 2.885  | 2.575  | 2.545  |
| 210548_at    | <i>CCL23</i>     | 2.375  | 2.105  | 2.115  |
| 239454_at    | <i>SCARF2</i>    | 2.775  | 2.465  | 2.455  |

|              |                  |        |        |        |
|--------------|------------------|--------|--------|--------|
| 227217_at    | <i>WNK2</i>      | 2.575  | 2.285  | 2.275  |
| 227544_at    | <i>C14orf83</i>  | 2.545  | 2.275  | 2.245  |
| 218155_x_at  | <i>TSR1</i>      | 7.855  | 6.965  | 6.985  |
| 231631_at    | <i>NA</i>        | 2.945  | 2.605  | 2.605  |
| 242858_at    | <i>C14orf2</i>   | 2.8    | 2.48   | 2.48   |
| 213646_x_at  | <i>TUBA1A</i>    | 12.475 | 11.105 | 11.035 |
| 1562449_s_at | <i>LARGE</i>     | 3.39   | 3.02   | 3      |
| 1561690_at   | <i>SSBP2</i>     | 2.64   | 2.34   | 2.34   |
| 212633_at    | <i>KIAA0776</i>  | 10.85  | 9.67   | 9.59   |
| 239850_at    | <i>ZNF441</i>    | 2.8    | 2.48   | 2.49   |
| 229077_at    | <i>KATNB1</i>    | 2.48   | 2.2    | 2.2    |
| 217898_at    | <i>C15orf24</i>  | 11.91  | 10.64  | 10.5   |
| 240281_at    | <i>RFT1</i>      | 2.48   | 2.2    | 2.2    |
| 232703_at    | <i>GLUD1</i>     | 2.725  | 2.415  | 2.425  |
| 1559362_at   | <i>KIAA0999</i>  | 2.965  | 2.635  | 2.625  |
| 233639_at    | <i>POMGNT1</i>   | 2.735  | 2.435  | 2.425  |
| 206071_s_at  | <i>EPHA3</i>     | 2.81   | 2.51   | 2.48   |
| 1557562_at   | <i>GRIPAP1</i>   | 3.495  | 3.105  | 3.095  |
| 1553734_at   | <i>AK7</i>       | 2.865  | 2.555  | 2.535  |
| 220980_s_at  | <i>ADPGK</i>     | 9.05   | 8.05   | 8.01   |
| 234094_x_at  | <i>DNAJA5</i>    | 3.535  | 3.155  | 3.115  |
| 228875_at    | <i>C6orf189</i>  | 2.68   | 2.38   | 2.38   |
| 1552586_at   | <i>TRPV3</i>     | 2.775  | 2.465  | 2.455  |
| 220336_s_at  | <i>GP6</i>       | 3.125  | 2.775  | 2.765  |
| 234235_at    | <i>NA</i>        | 2.945  | 2.615  | 2.605  |
| 230889_at    | <i>LOC645321</i> | 2.975  | 2.635  | 2.635  |
| 205458_at    | <i>MC1R</i>      | 3      | 2.66   | 2.66   |
| 241073_at    | <i>NA</i>        | 2.345  | 2.085  | 2.085  |
| 231107_at    | <i>RSU1</i>      | 2.86   | 2.54   | 2.54   |
| 202729_s_at  | <i>LTBP1</i>     | 13.615 | 12.025 | 12.155 |
| 1552889_a_at | <i>EXOC3L2</i>   | 4.65   | 4.15   | 4.11   |

|              |                     |        |        |        |
|--------------|---------------------|--------|--------|--------|
| 208457_at    | <i>GABRD</i>        | 2.185  | 1.945  | 1.945  |
| 222307_at    | <i>LOC282997</i>    | 2.67   | 2.37   | 2.37   |
| 1552826_at   | <i>SLC26A7</i>      | 3.165  | 2.815  | 2.795  |
| 230665_at    | <i>NA</i>           | 2.67   | 2.37   | 2.37   |
| 202325_s_at  | <i>ATP5J</i>        | 13.105 | 11.685 | 11.595 |
| 1559031_at   | <i>EXOSC10</i>      | 2.75   | 2.45   | 2.44   |
| 244309_at    | <i>LOC393076</i>    | 2.455  | 2.175  | 2.175  |
| 211066_x_at  | <i>PCDHGC3</i>      | 8.96   | 7.99   | 7.92   |
| 226144_at    | <i>REXO1</i>        | 2.395  | 2.125  | 2.135  |
| 1569339_s_at | <i>PAPLN</i>        | 3.2    | 2.83   | 2.86   |
| 232761_at    | <i>COX4I2</i>       | 3.04   | 2.7    | 2.7    |
| 229979_x_at  | <i>NA</i>           | 5.14   | 4.56   | 4.56   |
| 244717_x_at  | <i>SV2B</i>         | 2.79   | 2.47   | 2.48   |
| 214031_s_at  | <i>KRT7</i>         | 2.555  | 2.275  | 2.275  |
| 211493_x_at  | <i>DTNA</i>         | 2.73   | 2.43   | 2.43   |
| 213188_s_at  | <i>MINA</i>         | 9.765  | 8.655  | 8.705  |
| 210499_s_at  | <i>PQBPI</i>        | 6.765  | 6.035  | 5.975  |
| 1559692_at   | <i>NA</i>           | 2.795  | 2.485  | 2.475  |
| 1556099_at   | <i>hCG_2025798</i>  | 3.175  | 2.825  | 2.815  |
| 1556136_at   | <i>RP11-145H9.1</i> | 3.165  | 2.805  | 2.805  |
| 238097_at    | <i>FLJ41484</i>     | 3.315  | 2.955  | 2.945  |
| 241152_at    | <i>NA</i>           | 3.62   | 3.24   | 3.2    |
| 227025_at    | <i>PPHLN1</i>       | 2.815  | 2.505  | 2.495  |
| 1557476_at   | <i>PFN4</i>         | 2.985  | 2.645  | 2.655  |
| 243966_at    | <i>ZMYM5</i>        | 3.2    | 2.84   | 2.85   |
| 217347_at    | <i>NA</i>           | 4.065  | 3.585  | 3.625  |
| 1552440_at   | <i>ADMR</i>         | 3.475  | 3.105  | 3.085  |
| 1562414_at   | <i>NA</i>           | 2.885  | 2.565  | 2.565  |
| 214296_x_at  | <i>C19orf36</i>     | 3.855  | 3.435  | 3.425  |
| 228027_at    | <i>GPRASP2</i>      | 10.205 | 9.115  | 9.025  |
| 203852_s_at  | <i>SMNI</i>         | 9.085  | 8.095  | 8.065  |

|              |                     |        |        |        |
|--------------|---------------------|--------|--------|--------|
| 222229_x_at  | <i>hCG_26523</i>    | 9.655  | 8.635  | 8.515  |
| 211963_s_at  | <i>ARPC5</i>        | 13.105 | 11.575 | 11.715 |
| 216387_x_at  | <i>NA</i>           | 5.295  | 4.725  | 4.695  |
| 239938_x_at  | <i>MEF2C</i>        | 3.61   | 3.22   | 3.19   |
| 226036_x_at  | <i>CASP2</i>        | 3.035  | 2.715  | 2.675  |
| 238791_at    | <i>ZNF100</i>       | 4.435  | 3.965  | 3.905  |
| 241366_at    | <i>RBAK</i>         | 3.08   | 2.74   | 2.74   |
| 230070_at    | <i>CNIH2</i>        | 2.39   | 2.13   | 2.13   |
| 202663_at    | <i>WIPF1</i>        | 9.44   | 8.4    | 8.39   |
| 213467_at    | <i>RND2</i>         | 2.83   | 2.52   | 2.51   |
| 244255_at    | <i>LOC286114</i>    | 2.765  | 2.465  | 2.455  |
| 1570447_at   | <i>FLJ44054</i>     | 2.775  | 2.465  | 2.475  |
| 1557651_x_at | <i>GALE</i>         | 4.57   | 4.04   | 4.09   |
| 200043_at    | <i>ERH</i>          | 11.485 | 10.195 | 10.215 |
| 208984_x_at  | <i>RBM10</i>        | 7.45   | 6.66   | 6.6    |
| 214889_at    | <i>DKFZP564J102</i> | 3.04   | 2.7    | 2.7    |
| 1570227_at   | <i>COQ9</i>         | 3.035  | 2.695  | 2.705  |
| 202726_at    | <i>LIG1</i>         | 2.51   | 2.24   | 2.22   |
| 217891_at    | <i>C16orf58</i>     | 2.815  | 2.505  | 2.495  |
| 216740_at    | <i>TRERF1</i>       | 2.84   | 2.53   | 2.52   |
| 244150_at    | <i>SMC1A</i>        | 3.155  | 2.825  | 2.795  |
| 1558624_at   | <i>CUTL1</i>        | 3.175  | 2.825  | 2.815  |
| 38269_at     | <i>PRKD2</i>        | 4.955  | 4.415  | 4.405  |
| 230273_at    | <i>C6orf165</i>     | 4.995  | 4.435  | 4.445  |
| 238010_at    | <i>C1orf174</i>     | 2.85   | 2.54   | 2.53   |
| 232995_at    | <i>PDGFD</i>        | 2.655  | 2.365  | 2.355  |
| 1553678_a_at | <i>ITGB1</i>        | 12.32  | 10.92  | 11     |
| 208615_s_at  | <i>PTP4A2</i>       | 11.83  | 10.54  | 10.51  |
| 225060_at    | <i>LRP11</i>        | 12.19  | 10.8   | 10.9   |
| 1566141_at   | <i>GBF1</i>         | 2.59   | 2.31   | 2.31   |
| 1558795_at   | <i>LOC728052</i>    | 3.4    | 3.03   | 3.01   |

|              |                  |        |        |        |
|--------------|------------------|--------|--------|--------|
| 227440_at    | <i>ANKS1B</i>    | 2.46   | 2.19   | 2.18   |
| 244279_at    | <i>FLJ10159</i>  | 2.465  | 2.195  | 2.185  |
| 216987_at    | <i>IRF4</i>      | 3.155  | 2.815  | 2.805  |
| 209859_at    | <i>TRIM9</i>     | 3.45   | 3.06   | 3.08   |
| 1562337_at   | <i>OR7D2</i>     | 2.825  | 2.525  | 2.495  |
| 1556301_at   | <i>NA</i>        | 3.015  | 2.675  | 2.675  |
| 235720_at    | <i>CRIP3</i>     | 2.685  | 2.385  | 2.385  |
| 211909_x_at  | <i>PTGER3</i>    | 6.035  | 5.345  | 5.395  |
| 238796_at    | <i>YTHDC1</i>    | 2.805  | 2.505  | 2.495  |
| 213747_at    | <i>AZIN1</i>     | 12.23  | 10.95  | 10.83  |
| 231480_at    | <i>NA</i>        | 2.725  | 2.425  | 2.425  |
| 211489_at    | <i>ADRA1A</i>    | 2.89   | 2.58   | 2.56   |
| 212761_at    | <i>TCF7L2</i>    | 13.685 | 12.155 | 12.205 |
| 233377_at    | <i>ARID5B</i>    | 3.27   | 2.93   | 2.89   |
| 201029_s_at  | <i>CD99</i>      | 13.365 | 11.905 | 11.895 |
| 234099_at    | <i>LAMA2</i>     | 2.37   | 2.11   | 2.11   |
| 216276_s_at  | <i>ADAM3A</i>    | 3.65   | 3.27   | 3.23   |
| 218074_at    | <i>FAM96B</i>    | 9.565  | 8.535  | 8.505  |
| 228067_at    | <i>MGC42367</i>  | 2.87   | 2.55   | 2.56   |
| 216426_at    | <i>LOC644540</i> | 3.58   | 3.2    | 3.17   |
| 215980_s_at  | <i>IGHMBP2</i>   | 4.605  | 4.115  | 4.095  |
| 1563181_a_at | <i>NA</i>        | 2.88   | 2.56   | 2.56   |
| 1557297_at   | <i>ABCA13</i>    | 2.75   | 2.45   | 2.45   |
| 239686_at    | <i>NA</i>        | 2.625  | 2.345  | 2.335  |
| 235838_at    | <i>NLGN2</i>     | 2.525  | 2.245  | 2.245  |
| 237993_at    | <i>CHCHD5</i>    | 3.65   | 3.25   | 3.25   |
| 1559678_s_at | <i>LOC730495</i> | 3.1    | 2.76   | 2.76   |
| 207094_at    | <i>IL8RA</i>     | 2.485  | 2.215  | 2.205  |
| 33323_r_at   | <i>SFN</i>       | 3.28   | 2.93   | 2.91   |
| 202043_s_at  | <i>SMS</i>       | 11.195 | 9.965  | 9.975  |
| 227560_at    | <i>SFXN2</i>     | 3.3    | 2.92   | 2.96   |

|             |                      |        |        |        |
|-------------|----------------------|--------|--------|--------|
| 1561243_at  | <i>TMEM105</i>       | 2.8    | 2.5    | 2.5    |
| 228026_at   | <i>SIKE</i>          | 9.195  | 8.255  | 8.135  |
| 227442_at   | <i>COX18</i>         | 9.635  | 8.615  | 8.545  |
| 243473_at   | <i>KIAA0999</i>      | 3.395  | 3.025  | 3.015  |
| 216162_at   | <i>SBNO1</i>         | 2.715  | 2.425  | 2.415  |
| 219187_at   | <i>FKBPL</i>         | 4.75   | 4.2    | 4.26   |
| 216498_at   | <i>NA</i>            | 3.33   | 2.98   | 2.95   |
| 221549_at   | <i>GRWD1</i>         | 6.695  | 5.965  | 5.955  |
| 244076_at   | <i>RP11-130N24.1</i> | 2.73   | 2.43   | 2.43   |
| 224886_at   | <i>LOC339123</i>     | 6.365  | 5.695  | 5.635  |
| 220290_at   | <i>AIMIL</i>         | 3.565  | 3.165  | 3.195  |
| 228718_at   | <i>ZNF44</i>         | 7.12   | 6.37   | 6.31   |
| 222055_at   | <i>FAHD2A</i>        | 2.875  | 2.555  | 2.555  |
| 244122_at   | <i>MGST3</i>         | 2.505  | 2.235  | 2.225  |
| 221633_at   | <i>NCAPH2</i>        | 2.705  | 2.415  | 2.405  |
| 1554473_at  | <i>SRGAP1</i>        | 3.015  | 2.685  | 2.695  |
| 236708_at   | <i>CAPZB</i>         | 4.22   | 3.74   | 3.78   |
| 221439_at   | <i>RBBP9</i>         | 2.795  | 2.485  | 2.505  |
| 227276_at   | <i>PLXDC2</i>        | 2.965  | 2.645  | 2.645  |
| 210404_x_at | <i>CAMK2B</i>        | 2.73   | 2.43   | 2.43   |
| 210030_at   | <i>DOHH</i>          | 2.38   | 2.12   | 2.12   |
| 240409_at   | <i>LOC283507</i>     | 2.865  | 2.555  | 2.545  |
| 212925_at   | <i>C19orf21</i>      | 3.89   | 3.47   | 3.46   |
| 220859_at   | <i>NA</i>            | 3.325  | 2.965  | 2.965  |
| 212188_at   | <i>KCTD12</i>        | 13.195 | 11.705 | 11.815 |
| 221592_at   | <i>RPL31</i>         | 2.19   | 1.95   | 1.95   |
| 237746_at   | <i>SFRS11</i>        | 3.025  | 2.725  | 2.685  |
| 226707_at   | <i>NAPRT1</i>        | 4.4    | 3.93   | 3.91   |
| 236034_at   | <i>MCPH1</i>         | 2.74   | 2.45   | 2.43   |
| 234365_at   | <i>NA</i>            | 2.615  | 2.335  | 2.335  |
| 220332_at   | <i>CLDN16</i>        | 2.54   | 2.26   | 2.26   |

|              |                  |        |        |        |
|--------------|------------------|--------|--------|--------|
| 224565_at    | <i>TncRNA</i>    | 13.585 | 12.065 | 12.155 |
| 210920_x_at  | <i>EMID2</i>     | 3.36   | 2.98   | 3.01   |
| 230658_at    | <i>SLC7A2</i>    | 2.875  | 2.565  | 2.555  |
| 244797_at    | <i>NA</i>        | 2.41   | 2.15   | 2.15   |
| 242589_x_at  | <i>DOCK5</i>     | 7.21   | 6.39   | 6.47   |
| 205265_s_at  | <i>SPEG</i>      | 5.97   | 5.33   | 5.32   |
| 236038_at    | <i>NA</i>        | 3.5    | 3.12   | 3.12   |
| 231544_s_at  | <i>POLR3G</i>    | 3.13   | 2.8    | 2.78   |
| 209461_x_at  | <i>WDR18</i>     | 2.525  | 2.245  | 2.255  |
| 1570156_s_at | <i>FMNI</i>      | 3.17   | 2.81   | 2.84   |
| 235411_at    | <i>PGBD1</i>     | 4.555  | 4.065  | 4.055  |
| 203407_at    | <i>PPL</i>       | 2.525  | 2.255  | 2.245  |
| 200061_s_at  | <i>RPS24</i>     | 13.835 | 12.395 | 12.285 |
| 208713_at    | <i>HNRPUL1</i>   | 9.535  | 8.545  | 8.475  |
| 1556894_at   | <i>NT5DC2</i>    | 3.66   | 3.28   | 3.25   |
| 1566527_at   | <i>CUTL2</i>     | 3.205  | 2.875  | 2.855  |
| 1569090_x_at | <i>FLJ35390</i>  | 2.8    | 2.5    | 2.5    |
| 203533_s_at  | <i>CUL5</i>      | 10.795 | 9.585  | 9.675  |
| 244634_at    | <i>FAM53B</i>    | 2.695  | 2.405  | 2.395  |
| 229804_x_at  | <i>CBWD1</i>     | 8.615  | 7.665  | 7.725  |
| 219542_at    | <i>NEK11</i>     | 5.53   | 4.91   | 4.95   |
| 223572_at    | <i>HHATL</i>     | 2.4    | 2.14   | 2.14   |
| 1558881_at   | <i>LOC145820</i> | 2.565  | 2.285  | 2.285  |
| 37802_r_at   | <i>FAM63B</i>    | 4.99   | 4.42   | 4.48   |
| 220215_at    | <i>ZNF669</i>    | 5.25   | 4.72   | 4.66   |
| 1560492_at   | <i>CRADD</i>     | 4.775  | 4.255  | 4.255  |
| 1557740_a_at | <i>NA</i>        | 4.005  | 3.575  | 3.565  |
| 234950_s_at  | <i>RFWD2</i>     | 9.46   | 8.42   | 8.46   |
| 1560543_at   | <i>GRK4</i>      | 3.59   | 3.22   | 3.2    |
| 219545_at    | <i>KCTD14</i>    | 2.39   | 2.13   | 2.14   |
| 223851_s_at  | <i>TNFRSF18</i>  | 2.77   | 2.47   | 2.47   |

|              |                  |       |       |       |
|--------------|------------------|-------|-------|-------|
| 202210_x_at  | <i>GSK3A</i>     | 6.925 | 6.195 | 6.175 |
| 1563587_at   | <i>CDH4</i>      | 2.875 | 2.575 | 2.565 |
| 208448_x_at  | <i>IFNA16</i>    | 2.45  | 2.19  | 2.19  |
| 1563325_at   | <i>NA</i>        | 2.745 | 2.445 | 2.445 |
| 215141_at    | <i>NOL14</i>     | 2.325 | 2.085 | 2.085 |
| 204670_x_at  | <i>HLA-DRB5</i>  | 2.275 | 2.035 | 2.035 |
| 213401_s_at  | <i>TBL1X</i>     | 3.68  | 3.26  | 3.31  |
| 216506_x_at  | <i>MLLT10</i>    | 2.895 | 2.585 | 2.595 |
| 244352_at    | <i>NA</i>        | 3.515 | 3.155 | 3.115 |
| 227635_at    | <i>RBBP6</i>     | 2.82  | 2.52  | 2.52  |
| 240906_at    | <i>MRPS36</i>    | 3.075 | 2.745 | 2.755 |
| 1560889_a_at | <i>SEMA5A</i>    | 3.01  | 2.69  | 2.69  |
| 233966_at    | <i>NA</i>        | 2.65  | 2.37  | 2.36  |
| 1568922_at   | <i>SLC24A4</i>   | 2.695 | 2.415 | 2.405 |
| 243095_at    | <i>NA</i>        | 4.11  | 3.66  | 3.68  |
| 224069_x_at  | <i>P2RX2</i>     | 2.64  | 2.35  | 2.36  |
| 234565_x_at  | <i>NA</i>        | 3.3   | 2.95  | 2.94  |
| 235178_x_at  | <i>ESCO2</i>     | 3.37  | 3.02  | 3     |
| 1560638_a_at | <i>NA</i>        | 3.325 | 2.965 | 2.965 |
| 211130_x_at  | <i>EDA</i>       | 2.61  | 2.33  | 2.33  |
| 220012_at    | <i>ERO1LB</i>    | 3.4   | 3.03  | 3.04  |
| 207923_x_at  | <i>PAX8</i>      | 2.59  | 2.31  | 2.31  |
| 209193_at    | <i>PIMI</i>      | 5.885 | 5.285 | 5.235 |
| 1556846_at   | <i>LOC646670</i> | 2.79  | 2.5   | 2.49  |
| 1554017_at   | <i>FLJ39378</i>  | 2.695 | 2.415 | 2.415 |
| 207680_x_at  | <i>PAX3</i>      | 2.62  | 2.34  | 2.34  |
| 227470_at    | <i>ZNF553</i>    | 5.08  | 4.57  | 4.51  |
| 228668_x_at  | <i>FLJ36031</i>  | 2.875 | 2.575 | 2.575 |
| 219784_at    | <i>FBXO31</i>    | 4.86  | 4.32  | 4.37  |
| 215599_at    | <i>SMA4</i>      | 3.615 | 3.215 | 3.255 |
| 1563302_at   | <i>NA</i>        | 4.275 | 3.845 | 3.795 |



|             |                  |        |        |        |
|-------------|------------------|--------|--------|--------|
| 219824_at   | <i>SLC13A4</i>   | 2.695  | 2.415  | 2.405  |
| 240352_at   | <i>NA</i>        | 2.865  | 2.565  | 2.555  |
| 219221_at   | <i>ZBTB38</i>    | 11.035 | 9.895  | 9.825  |
| 238382_x_at | <i>COG5</i>      | 3.23   | 2.89   | 2.89   |
| 224724_at   | <i>SULF2</i>     | 6.33   | 5.64   | 5.67   |
| 215389_s_at | <i>TNNT2</i>     | 3.4    | 3.03   | 3.05   |
| 1561854_at  | <i>HBG2</i>      | 3.57   | 3.2    | 3.18   |
| 203152_at   | <i>MRPL40</i>    | 7.43   | 6.65   | 6.64   |
| 209718_at   | <i>NCAPH2</i>    | 5.82   | 5.19   | 5.22   |
| 239989_at   | <i>C9orf39</i>   | 4.01   | 3.58   | 3.6    |
| 210292_s_at | <i>PCDH11X</i>   | 3.04   | 2.72   | 2.71   |
| 220302_at   | <i>MAK</i>       | 2.565  | 2.295  | 2.285  |
| 1554694_at  | <i>CCNY</i>      | 2.745  | 2.455  | 2.445  |
| 216434_at   | <i>FLJ20699</i>  | 2.81   | 2.51   | 2.51   |
| 218046_s_at | <i>MRPS16</i>    | 6.305  | 5.665  | 5.615  |
| 209155_s_at | <i>NT5C2</i>     | 10.82  | 9.65   | 9.71   |
| 233282_at   | <i>FIP1L1</i>    | 3.17   | 2.83   | 2.84   |
| 209573_s_at | <i>C18orf1</i>   | 2.565  | 2.295  | 2.285  |
| 216334_s_at | <i>CYP2A7P1</i>  | 3.295  | 2.965  | 2.935  |
| 1555816_at  | <i>THSD4</i>     | 3.06   | 2.76   | 2.72   |
| 221849_s_at | <i>LOC90379</i>  | 3.005  | 2.695  | 2.685  |
| 160020_at   | <i>MMP14</i>     | 8.18   | 7.28   | 7.36   |
| 1563853_at  | <i>LOC283045</i> | 2.165  | 1.935  | 1.945  |
| 205334_at   | <i>SI00A1</i>    | 2.83   | 2.54   | 2.53   |
| 217856_at   | <i>RBM8A</i>     | 2.79   | 2.5    | 2.49   |
| 206777_s_at | <i>CRYBB2</i>    | 2.77   | 2.48   | 2.47   |
| 234315_at   | <i>BACH1</i>     | 3.015  | 2.715  | 2.685  |
| 203380_x_at | <i>SFRS5</i>     | 12.035 | 10.755 | 10.785 |
| 207772_s_at | <i>PRMT8</i>     | 3.02   | 2.71   | 2.69   |
| 1569713_at  | <i>NA</i>        | 2.585  | 2.305  | 2.315  |
| 243021_at   | <i>LOC643965</i> | 3.23   | 2.89   | 2.88   |

|              |                  |        |        |        |
|--------------|------------------|--------|--------|--------|
| 206460_at    | <i>AJAP1</i>     | 2.745  | 2.455  | 2.465  |
| 1554583_a_at | <i>MGC50559</i>  | 2.315  | 2.065  | 2.075  |
| 218256_s_at  | <i>NUP54</i>     | 10.61  | 9.56   | 9.42   |
| 242987_x_at  | <i>NA</i>        | 3.265  | 2.935  | 2.905  |
| 221967_at    | <i>NXPH4</i>     | 3.355  | 2.995  | 3.005  |
| 226442_at    | <i>ABTB1</i>     | 2.515  | 2.245  | 2.255  |
| 1567622_at   | <i>ABLIM2</i>    | 2.735  | 2.465  | 2.435  |
| 213655_at    | <i>PAFAH1B1</i>  | 15.475 | 13.865 | 13.835 |
| 1557665_at   | <i>NA</i>        | 3.16   | 2.83   | 2.81   |
| 222037_at    | <i>MCM4</i>      | 4.105  | 3.645  | 3.695  |
| 1560921_at   | <i>ZNF169</i>    | 2.63   | 2.36   | 2.35   |
| 212779_at    | <i>KIAA1109</i>  | 10.655 | 9.585  | 9.485  |
| 228319_at    | <i>FAM84A</i>    | 2.795  | 2.495  | 2.495  |
| 214675_at    | <i>NUP188</i>    | 2.89   | 2.59   | 2.59   |
| 222677_x_at  | <i>AURKAIP1</i>  | 3.515  | 3.135  | 3.165  |
| 233668_at    | <i>EDIL3</i>     | 2.65   | 2.37   | 2.37   |
| 243174_at    | <i>NA</i>        | 4.715  | 4.225  | 4.215  |
| 233205_at    | <i>NA</i>        | 3.355  | 3.015  | 2.985  |
| 214329_x_at  | <i>TNFSF10</i>   | 2.845  | 2.545  | 2.545  |
| 212836_at    | <i>POLD3</i>     | 8.465  | 7.575  | 7.585  |
| 237241_at    | <i>ECT2</i>      | 2.69   | 2.41   | 2.41   |
| 232144_at    | <i>PBX1</i>      | 3.135  | 2.825  | 2.795  |
| 1556872_s_at | <i>IQSEC3</i>    | 2.3    | 2.06   | 2.06   |
| 207136_at    | <i>ARR3</i>      | 2.545  | 2.285  | 2.275  |
| 233283_at    | <i>MAX</i>       | 2.84   | 2.55   | 2.54   |
| 223815_at    | <i>CCDC45</i>    | 3.2    | 2.84   | 2.88   |
| 208734_x_at  | <i>RAB2A</i>     | 11.715 | 10.465 | 10.515 |
| 204598_at    | <i>UBOX5</i>     | 5.035  | 4.515  | 4.505  |
| 1556607_at   | <i>EHD4</i>      | 3.6    | 3.21   | 3.23   |
| 208865_at    | <i>CSNK1A1</i>   | 13.8   | 12.39  | 12.33  |
| 220207_at    | <i>LOC541469</i> | 2.465  | 2.215  | 2.205  |

|              |                    |        |        |        |
|--------------|--------------------|--------|--------|--------|
| 236711_at    | <i>ZIC4</i>        | 2.69   | 2.42   | 2.4    |
| 1555904_at   | <i>NA</i>          | 3.025  | 2.695  | 2.715  |
| 241545_x_at  | <i>RBBP6</i>       | 3.67   | 3.28   | 3.3    |
| 212967_x_at  | <i>NAP1L1</i>      | 13.365 | 11.965 | 11.975 |
| 202402_s_at  | <i>CARS</i>        | 8.705  | 7.815  | 7.785  |
| 209638_x_at  | <i>RGS12</i>       | 4.02   | 3.61   | 3.6    |
| 1559565_x_at | <i>TPST1</i>       | 2.9    | 2.61   | 2.59   |
| 1558475_at   | <i>TNFSF5IP1</i>   | 2.615  | 2.335  | 2.335  |
| 219755_at    | <i>CBX8</i>        | 3.07   | 2.75   | 2.75   |
| 234864_s_at  | <i>TRPM6</i>       | 2.46   | 2.2    | 2.2    |
| 1558323_at   | <i>NA</i>          | 4.735  | 4.225  | 4.255  |
| 231267_at    | <i>C1orf76</i>     | 2.89   | 2.6    | 2.58   |
| 243004_at    | <i>NA</i>          | 3.28   | 2.94   | 2.94   |
| 209617_s_at  | <i>CTNND2</i>      | 2.89   | 2.59   | 2.59   |
| 203416_at    | <i>CD53</i>        | 2.7    | 2.41   | 2.42   |
| 226694_at    | <i>PALM2-AKAP2</i> | 13.98  | 12.6   | 12.45  |
| 212639_x_at  | <i>TUBA1A</i>      | 12.365 | 11.055 | 11.115 |
| 210599_at    | <i>ZNF614</i>      | 3.14   | 2.82   | 2.82   |
| 240203_at    | <i>NA</i>          | 3.28   | 2.95   | 2.92   |
| 231393_x_at  | <i>NA</i>          | 7.585  | 6.805  | 6.805  |
| 214238_at    | <i>NA</i>          | 2.845  | 2.555  | 2.545  |
| 1567333_at   | <i>NA</i>          | 2.795  | 2.505  | 2.495  |
| 204427_s_at  | <i>TMED2</i>       | 10.305 | 9.245  | 9.215  |
| 222563_s_at  | <i>TNKS2</i>       | 3.165  | 2.855  | 2.825  |
| 1564338_at   | <i>MKL1</i>        | 2.775  | 2.495  | 2.485  |
| 243155_at    | <i>NA</i>          | 2.585  | 2.325  | 2.315  |
| 240070_at    | <i>VSIG9</i>       | 2.605  | 2.335  | 2.325  |
| 223877_at    | <i>CIQTNF7</i>     | 3.015  | 2.695  | 2.705  |
| 1567069_at   | <i>OR4D1</i>       | 2.325  | 2.075  | 2.095  |
| 238483_at    | <i>NA</i>          | 3.08   | 2.75   | 2.77   |
| 227806_at    | <i>C16orf74</i>    | 2.83   | 2.54   | 2.53   |

|             |                 |       |       |       |
|-------------|-----------------|-------|-------|-------|
| 211357_s_at | <i>ALDOB</i>    | 3.12  | 2.81  | 2.79  |
| 1554629_at  | <i>EPHA7</i>    | 2.995 | 2.685 | 2.675 |
| 217149_x_at | <i>TNK1</i>     | 2.845 | 2.545 | 2.545 |
| 1554033_at  | <i>FRMD4A</i>   | 3.025 | 2.715 | 2.705 |
| 236406_at   | <i>ZNF324B</i>  | 2.835 | 2.545 | 2.535 |
| 207906_at   | <i>IL3</i>      | 2.595 | 2.335 | 2.325 |
| 1564897_at  | <i>NA</i>       | 2.28  | 2.04  | 2.05  |
| 1555146_at  | <i>ATF2</i>     | 2.935 | 2.625 | 2.635 |
| 239112_at   | <i>NA</i>       | 2.795 | 2.525 | 2.495 |
| 235898_at   | <i>NA</i>       | 2.33  | 2.08  | 2.1   |
| 233525_s_at | <i>C9orf44</i>  | 3.185 | 2.875 | 2.845 |
| 220149_at   | <i>FLJ22671</i> | 3.68  | 3.3   | 3.3   |
| 217820_s_at | <i>ENAH</i>     | 12.93 | 11.64 | 11.55 |
| 209143_s_at | <i>CLNS1A</i>   | 8.9   | 7.94  | 8.02  |
| 237174_at   | <i>NA</i>       | 2.53  | 2.27  | 2.27  |
| 230394_at   | <i>TCP10L</i>   | 3.065 | 2.755 | 2.735 |
| 222160_at   | <i>AKAP8L</i>   | 3.3   | 2.95  | 2.97  |
| 234003_at   | <i>COVA1</i>    | 2.925 | 2.615 | 2.625 |
| 231573_at   | <i>FATE1</i>    | 3.09  | 2.78  | 2.76  |
| 203263_s_at | <i>ARHGEF9</i>  | 2.725 | 2.435 | 2.445 |
| 212096_s_at | <i>MTUS1</i>    | 2.665 | 2.385 | 2.385 |
| 220791_x_at | <i>SCN11A</i>   | 2.97  | 2.67  | 2.67  |
| 229146_at   | <i>C7orf31</i>  | 2.96  | 2.66  | 2.65  |
| 211988_at   | <i>SMARCE1</i>  | 12.16 | 10.91 | 10.89 |
| 212931_at   | <i>TCF20</i>    | 8.345 | 7.485 | 7.485 |
| 221672_s_at | <i>NIBP</i>     | 2.74  | 2.46  | 2.46  |
| 234206_at   | <i>NA</i>       | 2.455 | 2.195 | 2.195 |
| 202846_s_at | <i>PIGC</i>     | 8.28  | 7.43  | 7.42  |
| 228696_at   | <i>SLC45A3</i>  | 2.995 | 2.685 | 2.695 |
| 234887_at   | <i>NA</i>       | 2.645 | 2.375 | 2.365 |
| 206961_s_at | <i>TRFP</i>     | 2.56  | 2.3   | 2.3   |

|             |                 |       |       |       |
|-------------|-----------------|-------|-------|-------|
| 224390_s_at | <i>RGS8</i>     | 2.46  | 2.2   | 2.2   |
| 209645_s_at | <i>ALDH1B1</i>  | 2.675 | 2.395 | 2.405 |
| 1561692_at  | <i>WWOX</i>     | 2.76  | 2.48  | 2.47  |
| 1560118_at  | <i>NA</i>       | 2.86  | 2.57  | 2.56  |
| 229834_at   | <i>NFIX</i>     | 3.1   | 2.78  | 2.78  |
| 241190_at   | <i>NA</i>       | 3.12  | 2.81  | 2.79  |
| 36553_at    | <i>ASMTL</i>    | 10.01 | 8.94  | 9.01  |
| 219191_s_at | <i>BIN2</i>     | 2.52  | 2.26  | 2.26  |
| 228117_at   | <i>C22orf32</i> | 2.935 | 2.635 | 2.625 |
| 222139_at   | <i>KIAA1466</i> | 2.745 | 2.465 | 2.465 |
| 228538_at   | <i>ZNF662</i>   | 2.74  | 2.46  | 2.46  |
| 229432_at   | <i>NAGS</i>     | 2.74  | 2.46  | 2.46  |
| 233806_at   | <i>NA</i>       | 2.585 | 2.325 | 2.325 |
| 233908_x_at | <i>NA</i>       | 4.055 | 3.655 | 3.625 |
| 239280_at   | <i>NA</i>       | 2.85  | 2.56  | 2.54  |
| 241349_at   | <i>NA</i>       | 2.645 | 2.365 | 2.375 |
| 1555871_at  | <i>KIAA1648</i> | 2.625 | 2.365 | 2.355 |
| 208238_x_at | <i>NA</i>       | 6.955 | 6.225 | 6.245 |
| 241807_x_at | <i>NA</i>       | 2.92  | 2.62  | 2.62  |
| 241720_at   | <i>ZNF326</i>   | 2.965 | 2.675 | 2.655 |
| 208921_s_at | <i>SRI</i>      | 11.48 | 10.35 | 10.25 |
| 229727_x_at | <i>NLF2</i>     | 3.205 | 2.885 | 2.875 |
| 206635_at   | <i>CHRNA2</i>   | 5.735 | 5.135 | 5.165 |
| 1565672_at  | <i>NA</i>       | 2.545 | 2.275 | 2.295 |
| 229287_at   | <i>NA</i>       | 11.77 | 10.61 | 10.52 |
| 232328_at   | <i>ZNF552</i>   | 2.645 | 2.375 | 2.365 |
| 224557_x_at | <i>P2RX2</i>    | 4.135 | 3.715 | 3.705 |
| 1552768_at  | <i>CAMKK1</i>   | 2.56  | 2.3   | 2.3   |
| 1565558_at  | <i>NA</i>       | 2.415 | 2.165 | 2.185 |
| 203772_at   | <i>BLVRA</i>    | 3.1   | 2.79  | 2.78  |
| 240818_at   | <i>NA</i>       | 2.805 | 2.525 | 2.525 |

|             |                  |        |        |        |
|-------------|------------------|--------|--------|--------|
| 216584_at   | <i>NA</i>        | 5.24   | 4.72   | 4.68   |
| 236017_at   | <i>CDKL3</i>     | 2.625  | 2.365  | 2.355  |
| 243355_at   | <i>NA</i>        | 2.425  | 2.185  | 2.185  |
| 214536_at   | <i>SLURP1</i>    | 2.37   | 2.13   | 2.13   |
| 231885_at   | <i>KIAA1702</i>  | 3.065  | 2.745  | 2.755  |
| 217769_s_at | <i>POMP</i>      | 12.535 | 11.295 | 11.215 |
| 203983_at   | <i>TSNAX</i>     | 11.76  | 10.56  | 10.56  |
| 213864_s_at | <i>NAPILI</i>    | 13.245 | 11.885 | 11.895 |
| 212589_at   | <i>RRAS2</i>     | 13.3   | 11.92  | 11.96  |
| 240043_at   | <i>NA</i>        | 3.37   | 3.05   | 3.01   |
| 234761_at   | <i>KIAA1530</i>  | 3.295  | 2.955  | 2.955  |
| 227370_at   | <i>KIAA1946</i>  | 11.78  | 10.6   | 10.56  |
| 241009_at   | <i>FOXN4</i>     | 2.56   | 2.3    | 2.3    |
| 219314_s_at | <i>ZNF219</i>    | 3.28   | 2.94   | 2.95   |
| 231682_at   | <i>NA</i>        | 2.76   | 2.49   | 2.46   |
| 235460_at   | <i>SNX22</i>     | 3.01   | 2.72   | 2.69   |
| 212139_at   | <i>GCNIL1</i>    | 9.055  | 8.085  | 8.185  |
| 1553002_at  | <i>DEFB105A</i>  | 2.68   | 2.42   | 2.39   |
| 242284_at   | <i>LOC199899</i> | 2.9    | 2.6    | 2.6    |
| 211517_s_at | <i>IL5RA</i>     | 3.08   | 2.78   | 2.75   |
| 224342_x_at | <i>LOC96610</i>  | 2.635  | 2.375  | 2.365  |
| 1559561_at  | <i>FBXO18</i>    | 3.025  | 2.725  | 2.715  |
| 209447_at   | <i>SYNE1</i>     | 8.65   | 7.77   | 7.77   |
| 217034_at   | <i>HLA-C</i>     | 4.32   | 3.89   | 3.87   |
| 240321_at   | <i>TCF4</i>      | 3.265  | 2.935  | 2.925  |
| 233402_at   | <i>SNX24</i>     | 2.885  | 2.595  | 2.575  |
| 1555979_at  | <i>FLJ39609</i>  | 2.845  | 2.565  | 2.555  |
| 1563425_at  | <i>CLYBL</i>     | 3.395  | 3.045  | 3.055  |
| 211958_at   | <i>IGFBP5</i>    | 3.565  | 3.205  | 3.205  |
| 238849_at   | <i>ACY1</i>      | 2.53   | 2.27   | 2.27   |
| 244146_at   | <i>DTWD1</i>     | 2.825  | 2.545  | 2.535  |

|              |                      |        |       |       |
|--------------|----------------------|--------|-------|-------|
| 222168_at    | <i>ALDH1A3</i>       | 2.985  | 2.685 | 2.685 |
| 216481_at    | <i>GRIP2</i>         | 2.95   | 2.66  | 2.64  |
| 240441_at    | <i>NA</i>            | 3.11   | 2.8   | 2.78  |
| 201353_s_at  | <i>BAZ2A</i>         | 2.97   | 2.68  | 2.66  |
| 225599_s_at  | <i>DKFZP779L1068</i> | 9.43   | 8.45  | 8.49  |
| 229606_at    | <i>NA</i>            | 14.75  | 13.28 | 13.22 |
| 216247_at    | <i>LOC440992</i>     | 4.845  | 4.345 | 4.355 |
| 1555809_at   | <i>CRISPLD2</i>      | 2.91   | 2.6   | 2.62  |
| 233967_at    | <i>NA</i>            | 2.485  | 2.235 | 2.225 |
| 209236_at    | <i>SLC23A2</i>       | 3.56   | 3.22  | 3.18  |
| 202110_at    | <i>COX7B</i>         | 11.87  | 10.71 | 10.62 |
| 1556267_at   | <i>C12orf28</i>      | 3.38   | 3.05  | 3.03  |
| 205073_at    | <i>CYP2J2</i>        | 2.845  | 2.565 | 2.555 |
| 212816_s_at  | <i>CBS</i>           | 2.825  | 2.535 | 2.545 |
| 1557145_at   | <i>STK38</i>         | 3.22   | 2.9   | 2.9   |
| 222078_at    | <i>NA</i>            | 3.355  | 3.015 | 3.015 |
| 1566787_at   | <i>NA</i>            | 3.16   | 2.85  | 2.83  |
| 230234_at    | <i>NA</i>            | 2.535  | 2.275 | 2.275 |
| 211646_at    | <i>NA</i>            | 3.09   | 2.77  | 2.78  |
| 232852_at    | <i>LDB2</i>          | 3.325  | 2.985 | 2.985 |
| 232731_x_at  | <i>RAMP2</i>         | 2.655  | 2.395 | 2.385 |
| 1557657_a_at | <i>LOC400238</i>     | 2.55   | 2.3   | 2.29  |
| 232368_at    | <i>BET3L</i>         | 3.34   | 3.02  | 2.99  |
| 1566881_at   | <i>NA</i>            | 2.645  | 2.385 | 2.385 |
| 1555498_at   | <i>NA</i>            | 3.12   | 2.82  | 2.79  |
| 207884_at    | <i>GUCY2D</i>        | 2.24   | 2.02  | 2.02  |
| 201119_s_at  | <i>COX8A</i>         | 10.685 | 9.655 | 9.555 |
| 1566541_at   | <i>PRKCE</i>         | 2.855  | 2.575 | 2.575 |
| 209743_s_at  | <i>ITCH</i>          | 3.84   | 3.46  | 3.45  |
| 201098_at    | <i>COPB2</i>         | 13.56  | 12.27 | 12.13 |
| 228358_at    | <i>SOX12</i>         | 2.56   | 2.29  | 2.32  |

|              |                  |       |       |       |
|--------------|------------------|-------|-------|-------|
| 214303_x_at  | <i>MUC5AC</i>    | 2.65  | 2.39  | 2.39  |
| 1568618_a_at | <i>GALNT1</i>    | 14.06 | 12.73 | 12.56 |
| 238803_at    | <i>HECTD2</i>    | 3.175 | 2.835 | 2.875 |
| 1554316_at   | <i>PGLS</i>      | 2.79  | 2.51  | 2.51  |
| 1554553_s_at | <i>YIF1B</i>     | 2.21  | 1.99  | 1.99  |
| 244799_s_at  | <i>NA</i>        | 2.695 | 2.425 | 2.415 |
| 1568752_s_at | <i>RGS13</i>     | 3.38  | 3.04  | 3.04  |
| 234043_at    | <i>DYM</i>       | 3.35  | 3.01  | 3.01  |
| 1565713_at   | <i>MYH9</i>      | 2.665 | 2.405 | 2.395 |
| 234496_x_at  | <i>NYX</i>       | 4.305 | 3.885 | 3.855 |
| 1554452_a_at | <i>HIG2</i>      | 4.415 | 3.995 | 3.955 |
| 1565787_at   | <i>ZCCHC7</i>    | 2.505 | 2.255 | 2.245 |
| 1559474_at   | <i>SPEG</i>      | 2.355 | 2.115 | 2.115 |
| 222345_at    | <i>NA</i>        | 2.81  | 2.54  | 2.52  |
| 234961_at    | <i>NA</i>        | 3.13  | 2.83  | 2.8   |
| 208583_x_at  | <i>HIST1H2AJ</i> | 3.79  | 3.42  | 3.41  |
| 222089_s_at  | <i>C16orf71</i>  | 2.655 | 2.395 | 2.385 |
| 201754_at    | <i>COX6C</i>     | 12.66 | 11.4  | 11.4  |
| 237457_at    | <i>EIF3S9</i>    | 2.64  | 2.38  | 2.38  |
| 220551_at    | <i>SLC17A6</i>   | 2.55  | 2.29  | 2.29  |
| 226717_at    | <i>LRRC51</i>    | 2.285 | 2.055 | 2.065 |
| 1557029_at   | <i>HMMR</i>      | 2.39  | 2.15  | 2.15  |
| 234372_at    | <i>NA</i>        | 2.675 | 2.415 | 2.405 |
| 220293_at    | <i>C14orf161</i> | 2.37  | 2.13  | 2.13  |
| 217131_at    | <i>NA</i>        | 3.17  | 2.87  | 2.84  |
| 237739_at    | <i>HBG1</i>      | 4.185 | 3.765 | 3.765 |
| 210880_s_at  | <i>EFS</i>       | 3.025 | 2.735 | 2.715 |
| 211688_x_at  | <i>KIR3DL2</i>   | 2.515 | 2.265 | 2.255 |
| 1564511_a_at | <i>FSTL4</i>     | 2.6   | 2.35  | 2.33  |
| 221844_x_at  | <i>NA</i>        | 13.87 | 12.45 | 12.53 |
| 232233_at    | <i>SLC22A16</i>  | 2.895 | 2.625 | 2.595 |



|              |                  |       |       |       |
|--------------|------------------|-------|-------|-------|
| 215296_at    | <i>CDC42BPA</i>  | 5.63  | 5.07  | 5.06  |
| 243503_at    | <i>NA</i>        | 2.59  | 2.33  | 2.33  |
| 1554577_a_at | <i>PSMD10</i>    | 6.585 | 5.895 | 5.955 |
| 214331_at    | <i>TFSM</i>      | 5.425 | 4.875 | 4.895 |
| 244686_at    | <i>TCOF1</i>     | 3.38  | 3.04  | 3.04  |
| 221966_at    | <i>GPR137</i>    | 2.49  | 2.25  | 2.24  |
| 237776_at    | <i>ZADH2</i>     | 2.385 | 2.145 | 2.145 |
| 201832_s_at  | <i>VDP</i>       | 13.58 | 12.21 | 12.24 |
| 207154_at    | <i>DIO3</i>      | 2.455 | 2.215 | 2.205 |
| 228881_at    | <i>PARL</i>      | 2.22  | 2     | 2     |
| 228807_at    | <i>NA</i>        | 2.59  | 2.34  | 2.33  |
| 228500_at    | <i>THAP8</i>     | 2.655 | 2.395 | 2.385 |
| 217630_at    | <i>ANGEL2</i>    | 3.38  | 3.04  | 3.04  |
| 1563263_at   | <i>PLCG2</i>     | 2.275 | 2.055 | 2.055 |
| 216699_s_at  | <i>KLK1</i>      | 2.885 | 2.605 | 2.605 |
| 211750_x_at  | <i>TUBA1C</i>    | 13.06 | 11.71 | 11.81 |
| 1558327_at   | <i>ZDHHC18</i>   | 2.735 | 2.465 | 2.455 |
| 222903_s_at  | <i>CPEB1</i>     | 2.82  | 2.55  | 2.53  |
| 241333_x_at  | <i>NA</i>        | 3.515 | 3.175 | 3.165 |
| 1566042_at   | <i>NA</i>        | 3.105 | 2.805 | 2.795 |
| 209066_x_at  | <i>UQCRB</i>     | 12.31 | 11.1  | 11.08 |
| 1555533_at   | <i>GPR103</i>    | 2.605 | 2.355 | 2.345 |
| 241830_at    | <i>C20orf112</i> | 2.265 | 2.055 | 2.035 |
| 226553_at    | <i>TMPRSS2</i>   | 2.84  | 2.56  | 2.56  |
| 220471_s_at  | <i>MYCT1</i>     | 2.68  | 2.42  | 2.41  |
| 1570516_s_at | <i>HBG2</i>      | 2.195 | 1.975 | 1.975 |
| 228140_s_at  | <i>PPP2R2C</i>   | 2.66  | 2.4   | 2.4   |
| 205127_at    | <i>PTGS1</i>     | 2.335 | 2.095 | 2.095 |
| 1558280_s_at | <i>ARHGAP29</i>  | 2.845 | 2.555 | 2.575 |
| 242995_at    | <i>XRNI</i>      | 3.855 | 3.475 | 3.475 |
| 238359_at    | <i>NA</i>        | 3.665 | 3.305 | 3.305 |

|              |                  |        |        |        |
|--------------|------------------|--------|--------|--------|
| 220820_at    | <i>NA</i>        | 3.315  | 2.985  | 2.995  |
| 233432_at    | <i>LOC646982</i> | 2.83   | 2.56   | 2.54   |
| 243122_at    | <i>LOC729658</i> | 2.995  | 2.695  | 2.695  |
| 1494_f_at    | <i>CYP2A6</i>    | 2.77   | 2.5    | 2.49   |
| 1557520_a_at | <i>TMEM59</i>    | 3.235  | 2.925  | 2.905  |
| 237731_at    | <i>LOC154092</i> | 3.095  | 2.795  | 2.795  |
| 1554892_a_at | <i>MS4A3</i>     | 2.77   | 2.5    | 2.48   |
| 212265_at    | <i>QKI</i>       | 13.845 | 12.485 | 12.475 |
| 1566171_at   | <i>RFFL</i>      | 3.42   | 3.08   | 3.09   |
| 219524_s_at  | <i>C20orf7</i>   | 3.42   | 3.08   | 3.08   |
| 211058_x_at  | <i>TUBA1B</i>    | 13.63  | 12.24  | 12.33  |
| 218986_s_at  | <i>FLJ20035</i>  | 5.555  | 4.985  | 5.035  |
| 203684_s_at  | <i>BCL2</i>      | 2.595  | 2.335  | 2.335  |
| 206970_at    | <i>CNTN2</i>     | 2.655  | 2.395  | 2.385  |
| 236486_at    | <i>NA</i>        | 3.22   | 2.92   | 2.89   |
| 232898_at    | <i>DAB2</i>      | 2.42   | 2.18   | 2.18   |
| 227915_at    | <i>ASB2</i>      | 2.565  | 2.315  | 2.305  |
| 234898_at    | <i>NA</i>        | 3.21   | 2.9    | 2.88   |
| 218041_x_at  | <i>SLC38A2</i>   | 13.55  | 12.17  | 12.25  |
| 202150_s_at  | <i>NEDD9</i>     | 2.8    | 2.52   | 2.52   |
| 240954_at    | <i>CPT1B</i>     | 2.41   | 2.17   | 2.17   |
| 226397_s_at  | <i>TBC1D7</i>    | 3.965  | 3.565  | 3.575  |
| 234385_at    | <i>LOC339666</i> | 2.975  | 2.685  | 2.675  |
| 1552304_at   | <i>ALG10</i>     | 2.575  | 2.315  | 2.325  |
| 220276_at    | <i>FLJ22655</i>  | 2.955  | 2.665  | 2.655  |
| 213840_s_at  | <i>MRPS12</i>    | 2.79   | 2.52   | 2.5    |
| 1552398_a_at | <i>CLEC12A</i>   | 3.365  | 3.035  | 3.025  |
| 238967_at    | <i>CLDN1</i>     | 3.52   | 3.17   | 3.18   |
| 40612_at     | <i>DOPEY1</i>    | 5.28   | 4.76   | 4.76   |
| 1564854_at   | <i>NA</i>        | 3.06   | 2.76   | 2.75   |
| 224438_at    | <i>NA</i>        | 3.22   | 2.9    | 2.91   |

|             |                  |        |       |       |
|-------------|------------------|--------|-------|-------|
| 227608_at   | <i>BSCL2</i>     | 8.16   | 7.38  | 7.34  |
| 225475_at   | <i>MIER1</i>     | 8.865  | 8.005 | 7.975 |
| 202579_x_at | <i>HMGN4</i>     | 10.645 | 9.565 | 9.645 |
| 220374_at   | <i>KLHL28</i>    | 2.665  | 2.395 | 2.405 |
| 1556699_at  | <i>RBPMS</i>     | 2.865  | 2.585 | 2.575 |
| 1561731_at  | <i>NA</i>        | 2.945  | 2.675 | 2.645 |
| 1567287_at  | <i>OR5K1</i>     | 3.3    | 2.99  | 2.96  |
| 239149_at   | <i>BRD4</i>      | 2.78   | 2.5   | 2.51  |
| 222005_s_at | <i>GNG3</i>      | 2.62   | 2.36  | 2.36  |
| 226029_at   | <i>VANGL2</i>    | 2.69   | 2.42  | 2.44  |
| 208338_at   | <i>P2RX3</i>     | 2.63   | 2.37  | 2.37  |
| 240618_at   | <i>PTPRA</i>     | 2.47   | 2.23  | 2.23  |
| 230190_at   | <i>NDFIP2</i>    | 2.44   | 2.2   | 2.2   |
| 1564705_at  | <i>GLS2</i>      | 3.375  | 3.045 | 3.035 |
| 209316_s_at | <i>HBS1L</i>     | 7.35   | 6.64  | 6.62  |
| 237709_at   | <i>NA</i>        | 2.39   | 2.15  | 2.15  |
| 219791_s_at | <i>NBLA00301</i> | 2.24   | 2.02  | 2.02  |
| 235282_at   | <i>SP2</i>       | 3.535  | 3.205 | 3.175 |
| 240634_x_at | <i>NA</i>        | 3      | 2.71  | 2.7   |
| 241429_at   | <i>NA</i>        | 2.495  | 2.255 | 2.255 |
| 220760_x_at | <i>ZNF665</i>    | 5.73   | 5.19  | 5.15  |
| 231602_at   | <i>PRRX2</i>     | 2.505  | 2.265 | 2.255 |
| 238038_at   | <i>NA</i>        | 3.26   | 2.96  | 2.93  |
| 1567341_at  | <i>FOXD4</i>     | 3.175  | 2.865 | 2.855 |
| 229724_at   | <i>GABRB3</i>    | 2.335  | 2.105 | 2.115 |
| 1561988_at  | <i>LOC286068</i> | 2.335  | 2.115 | 2.105 |
| 1560697_at  | <i>LOC283392</i> | 2.71   | 2.45  | 2.44  |
| 240353_s_at | <i>C12orf54</i>  | 3.405  | 3.085 | 3.055 |
| 1562080_at  | <i>NA</i>        | 3.21   | 2.9   | 2.88  |
| 205263_at   | <i>BCL10</i>     | 13.32  | 12.04 | 11.99 |
| 220671_at   | <i>CCRN4L</i>    | 2.365  | 2.135 | 2.125 |

|              |                 |        |        |        |
|--------------|-----------------|--------|--------|--------|
| 223992_x_at  | <i>ZCWPW1</i>   | 2.815  | 2.545  | 2.525  |
| 211072_x_at  | <i>TUBA1B</i>   | 13.605 | 12.195 | 12.345 |
| 200882_s_at  | <i>PSMD4</i>    | 11.91  | 10.74  | 10.76  |
| 1567374_at   | <i>NA</i>       | 2.825  | 2.555  | 2.535  |
| 244081_at    | <i>NA</i>       | 3.375  | 3.045  | 3.055  |
| 211101_x_at  | <i>LILRA2</i>   | 2.745  | 2.485  | 2.475  |
| 241961_at    | <i>SRD5A2L2</i> | 3.115  | 2.825  | 2.805  |
| 1554745_at   | <i>RALGPS1</i>  | 2.795  | 2.525  | 2.515  |
| 1562431_x_at | <i>NA</i>       | 3.695  | 3.355  | 3.315  |
| 224715_at    | <i>WDR34</i>    | 4.745  | 4.315  | 4.255  |
| 1556055_at   | <i>ATP11A</i>   | 3.27   | 2.93   | 2.97   |
| 217256_x_at  | <i>NA</i>       | 9.475  | 8.575  | 8.525  |
| 238875_at    | <i>ZC3H6</i>    | 3.2    | 2.88   | 2.89   |
| 211550_at    | <i>EGFR</i>     | 3.13   | 2.83   | 2.83   |
| 229036_at    | <i>TNRC6B</i>   | 9.695  | 8.775  | 8.725  |
| 241964_at    | <i>NA</i>       | 2.285  | 2.065  | 2.065  |
| 1555926_a_at | <i>NA</i>       | 3.88   | 3.51   | 3.49   |
| 205233_s_at  | <i>PAFAH2</i>   | 3.015  | 2.725  | 2.705  |
| 215055_at    | <i>B3GNTL1</i>  | 4.76   | 4.3    | 4.3    |
| 221021_s_at  | <i>CTNNB1</i>   | 8.035  | 7.225  | 7.285  |
| 234651_at    | <i>NA</i>       | 2.935  | 2.655  | 2.645  |
| 200930_s_at  | <i>VCL</i>      | 2.805  | 2.525  | 2.535  |
| 232043_at    | <i>GNG7</i>     | 3.32   | 3      | 3      |
| 226570_at    | <i>ATP1B3</i>   | 4.32   | 3.92   | 3.88   |
| 1568844_at   | <i>NA</i>       | 2.88   | 2.6    | 2.6    |
| 211582_x_at  | <i>LST1</i>     | 2.395  | 2.175  | 2.145  |
| 1555823_at   | <i>NA</i>       | 3.31   | 2.98   | 3      |
| 1559355_at   | <i>NXP2</i>     | 2.545  | 2.305  | 2.295  |
| 221286_s_at  | <i>MGC29506</i> | 3.975  | 3.595  | 3.585  |
| 235543_at    | <i>NA</i>       | 3.145  | 2.835  | 2.845  |
| 237890_at    | <i>DTNBP1</i>   | 2.745  | 2.485  | 2.475  |

|              |                 |        |        |        |
|--------------|-----------------|--------|--------|--------|
| 241476_at    | <i>NA</i>       | 2.5    | 2.26   | 2.25   |
| 241255_at    | <i>NA</i>       | 2.605  | 2.355  | 2.345  |
| 232337_at    | <i>B3GNT7</i>   | 2.25   | 2.03   | 2.03   |
| 219599_at    | <i>PRO1843</i>  | 8.78   | 7.88   | 7.97   |
| 239308_at    | <i>DYRK1A</i>   | 2.84   | 2.56   | 2.57   |
| 215547_at    | <i>TSC22D2</i>  | 2.615  | 2.355  | 2.355  |
| 242831_at    | <i>ATP8B2</i>   | 2.7    | 2.44   | 2.44   |
| 204108_at    | <i>NFYA</i>     | 6.865  | 6.205  | 6.205  |
| 1570410_at   | <i>CYGB</i>     | 3.08   | 2.79   | 2.77   |
| 220752_at    | <i>LOC51145</i> | 2.435  | 2.195  | 2.195  |
| 211403_x_at  | <i>VCX2</i>     | 2.825  | 2.555  | 2.545  |
| 1556815_at   | <i>H2AFY2</i>   | 3.67   | 3.32   | 3.3    |
| 203776_at    | <i>GPKOW</i>    | 8.015  | 7.285  | 7.195  |
| 209768_s_at  | <i>5-Sep</i>    | 2.91   | 2.65   | 2.61   |
| 208731_at    | <i>RAB2A</i>    | 13.945 | 12.555 | 12.645 |
| 1561609_at   | <i>NA</i>       | 3.03   | 2.74   | 2.73   |
| 213102_at    | <i>ACTR3</i>    | 14.06  | 12.76  | 12.64  |
| 1562324_a_at | <i>NA</i>       | 2.94   | 2.66   | 2.66   |
| 237814_at    | <i>NA</i>       | 3.025  | 2.745  | 2.715  |
| 239302_s_at  | <i>MAP3K2</i>   | 2.825  | 2.545  | 2.545  |
| 206503_x_at  | <i>PML</i>      | 2.565  | 2.325  | 2.325  |
| 209484_s_at  | <i>NSL1</i>     | 11.745 | 10.575 | 10.645 |
| 243882_at    | <i>NA</i>       | 3.185  | 2.885  | 2.875  |
| 243788_at    | <i>PHF11</i>    | 3.08   | 2.79   | 2.78   |
| 216381_x_at  | <i>AKR7A3</i>   | 3.05   | 2.76   | 2.75   |
| 1556608_a_at | <i>EHD4</i>     | 2.585  | 2.335  | 2.345  |
| 214405_at    | <i>CUGBP2</i>   | 3.3    | 3      | 2.97   |
| 232638_at    | <i>COL20A1</i>  | 2.885  | 2.615  | 2.595  |
| 215845_x_at  | <i>NA</i>       | 2.725  | 2.465  | 2.465  |
| 214548_x_at  | <i>GNAS</i>     | 12.91  | 11.64  | 11.7   |
| 1553740_a_at | <i>IRAK2</i>    | 2.7    | 2.45   | 2.43   |

|              |                  |        |        |        |
|--------------|------------------|--------|--------|--------|
| 205865_at    | <i>ARID3A</i>    | 2.955  | 2.675  | 2.665  |
| 242203_at    | <i>NA</i>        | 2.7    | 2.44   | 2.44   |
| 1559928_at   | <i>PAPPA</i>     | 2.5    | 2.26   | 2.26   |
| 217088_s_at  | <i>NCRI</i>      | 2.625  | 2.365  | 2.365  |
| 229622_at    | <i>FLJ37034</i>  | 2.995  | 2.725  | 2.695  |
| 240632_at    | <i>RAD51L1</i>   | 3.055  | 2.765  | 2.745  |
| 237849_at    | <i>MANIA1</i>    | 3.16   | 2.87   | 2.85   |
| 229112_at    | <i>LOC285813</i> | 3.89   | 3.49   | 3.53   |
| 1563135_at   | <i>NA</i>        | 2.66   | 2.41   | 2.4    |
| 1554225_a_at | <i>NA</i>        | 2.69   | 2.43   | 2.43   |
| 1554589_at   | <i>LENG9</i>     | 3.015  | 2.725  | 2.735  |
| 220706_at    | <i>ADAMTS7</i>   | 2.615  | 2.365  | 2.355  |
| 226912_at    | <i>ZDHHC23</i>   | 3.785  | 3.415  | 3.435  |
| 244100_at    | <i>KIAA0350</i>  | 2.91   | 2.62   | 2.64   |
| 211931_s_at  | <i>HNRPA3P1</i>  | 14.57  | 13.11  | 13.23  |
| 244842_x_at  | <i>TUBGCP2</i>   | 4.78   | 4.31   | 4.33   |
| 206063_x_at  | <i>YPEL1</i>     | 4.635  | 4.185  | 4.195  |
| 222444_at    | <i>ARMCX3</i>    | 14.145 | 12.725 | 12.845 |
| 232718_at    | <i>C8orf75</i>   | 2.355  | 2.125  | 2.135  |
| 210955_at    | <i>CASP10</i>    | 3.11   | 2.81   | 2.81   |
| 216019_x_at  | <i>PHLDB1</i>    | 2.405  | 2.165  | 2.175  |
| 1553115_at   | <i>NKDI</i>      | 2.69   | 2.43   | 2.43   |
| 210179_at    | <i>KCNJ13</i>    | 2.77   | 2.51   | 2.51   |
| 1554847_at   | <i>ATP6V1B1</i>  | 3.075  | 2.775  | 2.775  |
| 1562751_at   | <i>NA</i>        | 2.665  | 2.395  | 2.415  |
| 243512_x_at  | <i>IMMP2L</i>    | 3.715  | 3.355  | 3.355  |
| 236806_at    | <i>NA</i>        | 2.52   | 2.28   | 2.28   |
| 242075_at    | <i>NT5C2</i>     | 3.055  | 2.775  | 2.745  |
| 212435_at    | <i>TRIM33</i>    | 10.965 | 9.865  | 9.975  |
| 225035_x_at  | <i>FAM39DP</i>   | 6.475  | 5.865  | 5.845  |
| 1570054_at   | <i>NA</i>        | 3.305  | 2.985  | 2.985  |

|              |                  |       |       |       |
|--------------|------------------|-------|-------|-------|
| 220439_at    | <i>RIN3</i>      | 2.86  | 2.59  | 2.58  |
| 210107_at    | <i>CLCA1</i>     | 2.525 | 2.285 | 2.285 |
| 1569599_at   | <i>SAMSN1</i>    | 2.91  | 2.64  | 2.63  |
| 223876_at    | <i>SPATA16</i>   | 2.775 | 2.515 | 2.505 |
| 236096_at    | <i>SIPAIL3</i>   | 2.255 | 2.035 | 2.035 |
| 1563157_at   | <i>FOXP1</i>     | 2.765 | 2.505 | 2.495 |
| 226423_at    | <i>PAQR8</i>     | 5.525 | 4.975 | 5.025 |
| 1557003_at   | <i>FLJ25439</i>  | 2.5   | 2.26  | 2.26  |
| 242805_at    | <i>CCNC</i>      | 3.57  | 3.23  | 3.23  |
| 221409_at    | <i>OR2S2</i>     | 2.27  | 2.05  | 2.05  |
| 215086_at    | <i>IBTK</i>      | 2.93  | 2.66  | 2.64  |
| 221609_s at  | <i>WNT6</i>      | 3.24  | 2.94  | 2.93  |
| 224792_at    | <i>TNKS1BP1</i>  | 5.155 | 4.655 | 4.665 |
| 223845_at    | <i>LOC144305</i> | 2.52  | 2.29  | 2.27  |
| 235167_at    | <i>LOC23117</i>  | 2.77  | 2.5   | 2.52  |
| 210770_s at  | <i>CACNA1A</i>   | 2.755 | 2.505 | 2.485 |
| 240342_at    | <i>TRIM61</i>    | 4.485 | 4.065 | 4.065 |
| 212845_at    | <i>SAMD4A</i>    | 12.15 | 10.99 | 11    |
| 233610_at    | <i>LOC645355</i> | 2.815 | 2.565 | 2.535 |
| 1568755_a at | <i>NA</i>        | 2.74  | 2.48  | 2.47  |
| 210565_at    | <i>GCGR</i>      | 2.04  | 1.85  | 1.84  |
| 241837_at    | <i>ARID5B</i>    | 2.755 | 2.485 | 2.505 |
| 208655_at    | <i>CCNI</i>      | 13.2  | 11.91 | 11.98 |
| 1570296_at   | <i>NA</i>        | 2.85  | 2.58  | 2.57  |
| 244027_at    | <i>ABCB7</i>     | 3.29  | 2.97  | 2.97  |
| 241768_at    | <i>BCCIP</i>     | 3.275 | 2.965 | 2.945 |
| 218382_s at  | <i>U2AF2</i>     | 3.075 | 2.785 | 2.775 |
| 229124_at    | <i>PROK1</i>     | 2.47  | 2.23  | 2.23  |
| 1554934_at   | <i>RCBTB1</i>    | 3.13  | 2.84  | 2.82  |
| 203923_s at  | <i>CYBB</i>      | 3.035 | 2.755 | 2.745 |
| 1568739_at   | <i>LOC285692</i> | 3.03  | 2.76  | 2.73  |

|              |                   |        |       |       |
|--------------|-------------------|--------|-------|-------|
| 204936_at    | <i>MAP4K2</i>     | 2.99   | 2.72  | 2.7   |
| 236176_at    | <i>LOC645757</i>  | 2.435  | 2.205 | 2.195 |
| 206345_s_at  | <i>PONI</i>       | 2.515  | 2.275 | 2.275 |
| 241270_at    | <i>RHBDF2</i>     | 2.78   | 2.51  | 2.53  |
| 208752_x_at  | <i>NAPILI</i>     | 12.83  | 11.56 | 11.66 |
| 239481_at    | <i>RPI-32F7.2</i> | 3.025  | 2.745 | 2.735 |
| 240051_at    | <i>TPD52L3</i>    | 3.745  | 3.405 | 3.375 |
| 242942_at    | <i>MGC15523</i>   | 3.115  | 2.815 | 2.815 |
| 240481_at    | <i>TRAF3IP3</i>   | 3.125  | 2.825 | 2.825 |
| 201589_at    | <i>SMC1A</i>      | 10.265 | 9.235 | 9.345 |
| 1560264_at   | <i>MGST2</i>      | 2.57   | 2.33  | 2.33  |
| 234857_at    | <i>NA</i>         | 2.33   | 2.11  | 2.11  |
| 208056_s_at  | <i>CBFA2T3</i>    | 3.025  | 2.735 | 2.745 |
| 201222_s_at  | <i>RAD23B</i>     | 10.97  | 9.96  | 9.9   |
| 227167_s_at  | <i>RASSF3</i>     | 9.75   | 8.77  | 8.88  |
| 1553317_s_at | <i>GPR82</i>      | 3.005  | 2.725 | 2.715 |
| 242274_x_at  | <i>SLC25A42</i>   | 3.53   | 3.2   | 3.19  |
| 1553099_at   | <i>TIGD1</i>      | 3.86   | 3.49  | 3.51  |
| 1559871_s_at | <i>TDH</i>        | 3.3    | 3     | 2.97  |
| 219485_s_at  | <i>PSMD10</i>     | 11.02  | 10.02 | 9.93  |
| 1561976_at   | <i>Clorf167</i>   | 2.635  | 2.395 | 2.385 |
| 209251_x_at  | <i>TUBA1C</i>     | 13.6   | 12.25 | 12.39 |
| 1561354_at   | <i>NA</i>         | 2.595  | 2.355 | 2.355 |
| 224874_at    | <i>POLRID</i>     | 8.68   | 7.87  | 7.85  |
| 231560_at    | <i>LRRC34</i>     | 3.3    | 3     | 2.97  |
| 243144_at    | <i>NA</i>         | 2.795  | 2.535 | 2.525 |
| 1561445_at   | <i>NA</i>         | 3.08   | 2.78  | 2.79  |
| 204646_at    | <i>DPYD</i>       | 10.925 | 9.895 | 9.885 |
| 236282_at    | <i>NA</i>         | 4.17   | 3.77  | 3.78  |
| 223117_s_at  | <i>USP47</i>      | 11.15  | 10.11 | 10.08 |
| 237170_at    | <i>NA</i>         | 3.12   | 2.83  | 2.82  |



|              |                  |        |       |       |
|--------------|------------------|--------|-------|-------|
| 218911_at    | <i>YEATS4</i>    | 4.955  | 4.485 | 4.505 |
| 1557787_at   | <i>NA</i>        | 2.97   | 2.69  | 2.69  |
| 1558334_a_at | <i>C22orf15</i>  | 3.455  | 3.115 | 3.155 |
| 1557590_at   | <i>PARD6G</i>    | 2.56   | 2.33  | 2.31  |
| 1557236_at   | <i>APOL6</i>     | 3.915  | 3.545 | 3.555 |
| 1566512_at   | <i>LOC200169</i> | 2.195  | 1.995 | 1.985 |
| 218847_at    | <i>IGF2BP2</i>   | 9.045  | 8.205 | 8.175 |
| 220782_x_at  | <i>KLK12</i>     | 2.645  | 2.395 | 2.405 |
| 222937_s_at  | <i>MMP28</i>     | 2.455  | 2.215 | 2.225 |
| 232540_x_at  | <i>CDR2</i>      | 5.57   | 5.06  | 5.04  |
| 221022_s_at  | <i>PMFBP1</i>    | 2.53   | 2.29  | 2.29  |
| 204274_at    | <i>EBAG9</i>     | 10.825 | 9.745 | 9.865 |
| 237962_x_at  | <i>KIAA1267</i>  | 3.345  | 3.045 | 3.015 |
| 232082_x_at  | <i>SPRR3</i>     | 2.34   | 2.12  | 2.12  |
| 236869_at    | <i>PISD</i>      | 2.74   | 2.48  | 2.49  |
| 234686_at    | <i>SUGT1</i>     | 3.49   | 3.17  | 3.16  |
| 240982_at    | <i>CARS</i>      | 2.515  | 2.285 | 2.275 |
| 215445_x_at  | <i>l-Mar</i>     | 3.935  | 3.565 | 3.575 |
| 212532_s_at  | <i>LSM12</i>     | 10.785 | 9.815 | 9.725 |
| 212943_at    | <i>KIAA0528</i>  | 9.77   | 8.88  | 8.82  |
| 1554813_at   | <i>NA</i>        | 2.855  | 2.605 | 2.575 |
| 1569235_a_at | <i>LOC729303</i> | 3.04   | 2.76  | 2.76  |
| 233089_at    | <i>QRSL1</i>     | 3.24   | 2.95  | 2.92  |
| 1557666_s_at | <i>C9orf98</i>   | 2.705  | 2.445 | 2.445 |
| 1558595_at   | <i>FLJ23861</i>  | 3.41   | 3.08  | 3.1   |
| 220924_s_at  | <i>SLC38A2</i>   | 13.08  | 11.81 | 11.91 |
| 230938_x_at  | <i>ATF5</i>      | 3.165  | 2.875 | 2.855 |
| 1559313_at   | <i>FLJ35740</i>  | 2.935  | 2.655 | 2.655 |
| 1555348_at   | <i>TFAP2E</i>    | 2.815  | 2.545 | 2.555 |
| 206286_s_at  | <i>TDGF1</i>     | 3.285  | 2.985 | 2.975 |
| 1569610_at   | <i>IQCH</i>      | 2.815  | 2.555 | 2.545 |

|              |                 |        |        |        |
|--------------|-----------------|--------|--------|--------|
| 204681_s_at  | <i>RAPGEF5</i>  | 3.515  | 3.195  | 3.185  |
| 230816_at    | <i>NA</i>       | 2.815  | 2.565  | 2.545  |
| 211076_x_at  | <i>ATNI</i>     | 2.58   | 2.34   | 2.34   |
| 1557560_at   | <i>NA</i>       | 2.505  | 2.265  | 2.265  |
| 226917_s_at  | <i>ANAPC4</i>   | 12.29  | 11.21  | 11.08  |
| 1560074_at   | <i>PRKCA</i>    | 2.855  | 2.595  | 2.585  |
| 241209_at    | <i>IQWD1</i>    | 3.345  | 3.035  | 3.015  |
| 230686_s_at  | <i>SLC13A3</i>  | 2.745  | 2.485  | 2.485  |
| 1566916_at   | <i>HPYR1</i>    | 2.765  | 2.515  | 2.505  |
| 1553020_at   | <i>SMCR5</i>    | 2.695  | 2.445  | 2.435  |
| 1559921_at   | <i>PECAMI</i>   | 2.475  | 2.235  | 2.245  |
| 209252_at    | <i>HARS2</i>    | 6.515  | 5.925  | 5.895  |
| 243015_at    | <i>CYP3A5</i>   | 2.955  | 2.685  | 2.675  |
| 223667_at    | <i>FKBP7</i>    | 3.125  | 2.835  | 2.825  |
| 1569808_at   | <i>NA</i>       | 3.5    | 3.17   | 3.19   |
| 1556499_s_at | <i>COL1A1</i>   | 15.625 | 14.085 | 14.245 |
| 239584_at    | <i>NA</i>       | 2.37   | 2.15   | 2.15   |
| 1566186_at   | <i>NA</i>       | 2.35   | 2.13   | 2.13   |
| 230977_at    | <i>NPM2</i>     | 6.375  | 5.755  | 5.805  |
| 1561813_at   | <i>NA</i>       | 2.79   | 2.54   | 2.52   |
| 226424_at    | <i>CAPS</i>     | 3.7    | 3.36   | 3.35   |
| 206774_at    | <i>FRMPD1</i>   | 2.625  | 2.385  | 2.385  |
| 241859_at    | <i>NA</i>       | 3.25   | 2.95   | 2.94   |
| 1555547_at   | <i>DNAJC6</i>   | 3.02   | 2.75   | 2.72   |
| 203762_s_at  | <i>DYNC2L1I</i> | 7.29   | 6.65   | 6.57   |
| 205572_at    | <i>ANGPT2</i>   | 2.76   | 2.5    | 2.5    |
| 205938_at    | <i>PPM1E</i>    | 2.495  | 2.265  | 2.255  |
| 1559065_a_at | <i>CLEC4G</i>   | 2.61   | 2.38   | 2.36   |
| 239534_at    | <i>NA</i>       | 2.39   | 2.17   | 2.17   |
| 221217_s_at  | <i>A2BP1</i>    | 2.55   | 2.31   | 2.31   |
| 224006_at    | <i>NA</i>       | 3.23   | 2.93   | 2.93   |

|             |                  |        |        |        |
|-------------|------------------|--------|--------|--------|
| 240723_at   | <i>EVL</i>       | 2.485  | 2.245  | 2.255  |
| 217390_x_at | <i>NA</i>        | 4.295  | 3.905  | 3.885  |
| 228755_at   | <i>PERO1</i>     | 2.605  | 2.365  | 2.355  |
| 213881_x_at | <i>SUMO2</i>     | 14.195 | 12.955 | 12.795 |
| 241577_at   | <i>AFF3</i>      | 2.505  | 2.275  | 2.265  |
| 216031_x_at | <i>HN1L</i>      | 2.885  | 2.635  | 2.605  |
| 216153_x_at | <i>RECK</i>      | 7.31   | 6.61   | 6.65   |
| 1562329_at  | <i>CSMD1</i>     | 3.115  | 2.835  | 2.825  |
| 202423_at   | <i>MYST3</i>     | 9.155  | 8.295  | 8.325  |
| 226491_x_at | <i>PTBP1</i>     | 5.975  | 5.405  | 5.435  |
| 1555303_at  | <i>NA</i>        | 3.195  | 2.895  | 2.895  |
| 234617_at   | <i>OR52D1</i>    | 2.33   | 2.11   | 2.11   |
| 233108_at   | <i>NA</i>        | 2.58   | 2.34   | 2.34   |
| 230054_at   | <i>PRRT1</i>     | 2.715  | 2.445  | 2.475  |
| 230808_at   | <i>FNTA</i>      | 3.975  | 3.615  | 3.605  |
| 1564295_at  | <i>FLJ25917</i>  | 3.295  | 2.995  | 2.995  |
| 204988_at   | <i>FGB</i>       | 2.855  | 2.605  | 2.585  |
| 202552_s_at | <i>CRIMI</i>     | 14.09  | 12.87  | 12.71  |
| 1566538_at  | <i>MAGII</i>     | 2.865  | 2.605  | 2.605  |
| 232627_at   | <i>HGS</i>       | 3.63   | 3.29   | 3.29   |
| 232501_at   | <i>NA</i>        | 2.59   | 2.35   | 2.35   |
| 1561529_at  | <i>NA</i>        | 2.975  | 2.705  | 2.685  |
| 201616_s_at | <i>CALD1</i>     | 12.98  | 11.78  | 11.79  |
| 217519_at   | <i>MACF1</i>     | 3.075  | 2.805  | 2.785  |
| 242129_at   | <i>SIN3B</i>     | 2.235  | 2.025  | 2.045  |
| 206021_at   | <i>SCAND2</i>    | 2.86   | 2.6    | 2.6    |
| 1568689_at  | <i>LOC728853</i> | 3.385  | 3.085  | 3.055  |
| 241575_at   | <i>NA</i>        | 2.69   | 2.45   | 2.45   |
| 238545_at   | <i>BRD7</i>      | 3.66   | 3.32   | 3.32   |
| 204985_s_at | <i>TRAPPC6A</i>  | 3.775  | 3.425  | 3.435  |
| 231595_at   | <i>XLKDI</i>     | 2.295  | 2.075  | 2.075  |

|              |                  |        |        |        |
|--------------|------------------|--------|--------|--------|
| 231442_at    | <i>ZPBP2</i>     | 2.6    | 2.36   | 2.36   |
| 220541_at    | <i>MMP26</i>     | 2.235  | 2.035  | 2.035  |
| 1561037_a_at | <i>NA</i>        | 3.095  | 2.815  | 2.815  |
| 214189_s_at  | <i>GGA2</i>      | 2.725  | 2.475  | 2.465  |
| 215702_s_at  | <i>CFTR</i>      | 2.97   | 2.69   | 2.69   |
| 1569306_at   | <i>NA</i>        | 2.99   | 2.73   | 2.7    |
| 228447_at    | <i>CXYorf3</i>   | 2.6    | 2.36   | 2.36   |
| 214050_at    | <i>CGGBP1</i>    | 4.65   | 4.23   | 4.22   |
| 242109_at    | <i>SYTL3</i>     | 3.24   | 2.95   | 2.93   |
| 226841_at    | <i>MPEG1</i>     | 2.315  | 2.095  | 2.095  |
| 228413_s_at  | <i>SFRP1</i>     | 2.68   | 2.44   | 2.43   |
| 233792_at    | <i>NA</i>        | 2.795  | 2.525  | 2.545  |
| 228498_at    | <i>NA</i>        | 15.775 | 14.325 | 14.335 |
| 1570043_at   | <i>NA</i>        | 3.25   | 2.95   | 2.95   |
| 225960_at    | <i>ZNRF1</i>     | 3.43   | 3.11   | 3.12   |
| 210723_x_at  | <i>MGC4771</i>   | 3.03   | 2.74   | 2.76   |
| 234022_at    | <i>GALK2</i>     | 3.355  | 3.055  | 3.055  |
| 230105_at    | <i>HOXB13</i>    | 2.475  | 2.255  | 2.255  |
| 214898_x_at  | <i>MUC3B</i>     | 4.37   | 3.96   | 3.98   |
| 1570361_a_at | <i>TTC28</i>     | 3.645  | 3.305  | 3.305  |
| 232906_at    | <i>KLHL20</i>    | 2.6    | 2.37   | 2.35   |
| 212651_at    | <i>RHOBTB1</i>   | 9.665  | 8.775  | 8.785  |
| 1552627_a_at | <i>ARHGAP5</i>   | 3.305  | 3.005  | 3.005  |
| 217282_at    | <i>MANIA2</i>    | 3.015  | 2.745  | 2.725  |
| 1565282_at   | <i>NA</i>        | 2.6    | 2.36   | 2.36   |
| 242152_at    | <i>MTCP1</i>     | 2.99   | 2.72   | 2.7    |
| 215971_at    | <i>CI4orf135</i> | 2.435  | 2.215  | 2.215  |
| 242531_at    | <i>RRAGC</i>     | 3.05   | 2.78   | 2.76   |
| 201398_s_at  | <i>TRAM1</i>     | 14.31  | 13.04  | 12.95  |
| 235237_at    | <i>LOC203547</i> | 2.705  | 2.465  | 2.465  |
| 210401_at    | <i>P2RX1</i>     | 2.66   | 2.42   | 2.41   |

|             |                    |        |        |        |
|-------------|--------------------|--------|--------|--------|
| 243839_s_at | <i>NA</i>          | 2.825  | 2.575  | 2.555  |
| 1560213_at  | <i>HLA-A</i>       | 2.305  | 2.085  | 2.095  |
| 238615_at   | <i>ERLIN2</i>      | 2.335  | 2.115  | 2.115  |
| 216975_x_at | <i>NPASI</i>       | 2.985  | 2.715  | 2.705  |
| 1561469_at  | <i>NA</i>          | 3.52   | 3.2    | 3.2    |
| 211046_at   | <i>KCNH6</i>       | 3.205  | 2.925  | 2.895  |
| 219827_at   | <i>UCP3</i>        | 2.86   | 2.61   | 2.59   |
| 241120_s_at | <i>CDC20B</i>      | 3.07   | 2.8    | 2.78   |
| 1565776_at  | <i>ABCA1</i>       | 2.785  | 2.525  | 2.535  |
| 215386_at   | <i>AUTS2</i>       | 2.525  | 2.295  | 2.285  |
| 241160_at   | <i>NA</i>          | 2.725  | 2.485  | 2.475  |
| 206648_at   | <i>ZNF571</i>      | 2.905  | 2.635  | 2.645  |
| 216684_s_at | <i>SS18</i>        | 4.43   | 4.05   | 4.01   |
| 1556232_at  | <i>KIF6</i>        | 2.675  | 2.445  | 2.425  |
| 239136_at   | <i>hCG 1818231</i> | 2.85   | 2.59   | 2.59   |
| 243893_at   | <i>KCNC3</i>       | 2.57   | 2.34   | 2.33   |
| 1556250_at  | <i>ST18</i>        | 2.795  | 2.535  | 2.545  |
| 1557177_at  | <i>OLFML1</i>      | 3.12   | 2.85   | 2.82   |
| 224911_s_at | <i>DCBLD2</i>      | 12.585 | 11.425 | 11.455 |
| 244133_at   | <i>NA</i>          | 2.945  | 2.695  | 2.665  |
| 219517_at   | <i>ELL3</i>        | 6.855  | 6.215  | 6.255  |
| 201326_at   | <i>CCT6A</i>       | 12.435 | 11.315 | 11.285 |
| 240749_at   | <i>NA</i>          | 3.07   | 2.79   | 2.79   |
| 1566185_at  | <i>NA</i>          | 2.46   | 2.25   | 2.23   |
| 207022_s_at | <i>LDHC</i>        | 2.71   | 2.47   | 2.46   |
| 230853_at   | <i>NA</i>          | 2.44   | 2.22   | 2.22   |
| 1566836_at  | <i>NA</i>          | 2.85   | 2.6    | 2.58   |
| 228484_s_at | <i>FOXO1A</i>      | 2.375  | 2.155  | 2.155  |
| 1570250_at  | <i>RP11-35N6.1</i> | 3.02   | 2.75   | 2.74   |
| 235949_at   | <i>TTC26</i>       | 3.74   | 3.41   | 3.39   |
| 220570_at   | <i>RETN</i>        | 2.585  | 2.345  | 2.345  |

|             |                    |        |       |       |
|-------------|--------------------|--------|-------|-------|
| 1559902_at  | <i>MKL1</i>        | 2.675  | 2.435 | 2.425 |
| 1570433_at  | <i>TMPRSS2</i>     | 2.265  | 2.065 | 2.065 |
| 239020_at   | <i>FUT10</i>       | 2.965  | 2.705 | 2.695 |
| 227855_at   | <i>ZNF219</i>      | 2.71   | 2.46  | 2.48  |
| 241475_at   | <i>LOC286076</i>   | 2.7    | 2.46  | 2.45  |
| 219718_at   | <i>FLJ10986</i>    | 2.485  | 2.265 | 2.255 |
| 220971_at   | <i>IL25</i>        | 2.485  | 2.275 | 2.255 |
| 225918_at   | <i>LOC146346</i>   | 10.945 | 9.905 | 9.995 |
| 240962_at   | <i>ITGA9</i>       | 2.525  | 2.305 | 2.295 |
| 236743_at   | <i>GOLGA7</i>      | 2.345  | 2.125 | 2.125 |
| 202760_s_at | <i>PALM2-AKAP2</i> | 13.71  | 12.5  | 12.43 |
| 1560734_at  | <i>OR4N4</i>       | 2.725  | 2.495 | 2.465 |
| 1562270_at  | <i>ARHGEF7</i>     | 3.415  | 3.125 | 3.095 |
| 222115_x_at | <i>N-PAC</i>       | 2.795  | 2.545 | 2.535 |
| 238744_at   | <i>ATPBD4</i>      | 2.755  | 2.505 | 2.515 |
| 206217_at   | <i>EDA</i>         | 2.46   | 2.25  | 2.23  |
| 200810_s_at | <i>CIRBP</i>       | 14.15  | 12.87 | 12.87 |
| 236726_at   | <i>NA</i>          | 2.84   | 2.58  | 2.58  |
| 209889_at   | <i>SEC31B</i>      | 2.595  | 2.365 | 2.355 |
| 244338_at   | <i>LDLRAD3</i>     | 3.025  | 2.755 | 2.745 |
| 224003_at   | <i>TTY14</i>       | 3.145  | 2.865 | 2.865 |
| 1569482_at  | <i>NA</i>          | 3.69   | 3.37  | 3.34  |
| 1554801_at  | <i>MGC27121</i>    | 2.86   | 2.61  | 2.6   |
| 1566889_at  | <i>THADA</i>       | 2.63   | 2.4   | 2.39  |
| 238383_at   | <i>C6orf58</i>     | 2.42   | 2.21  | 2.2   |
| 241450_at   | <i>RSPO1</i>       | 2.47   | 2.25  | 2.25  |
| 214463_x_at | <i>HIST1H4K</i>    | 2.745  | 2.505 | 2.495 |
| 235527_at   | <i>LOC284214</i>   | 3.12   | 2.85  | 2.83  |
| 206659_at   | <i>FLJ14082</i>    | 2.715  | 2.485 | 2.465 |
| 1555053_at  | <i>SYT9</i>        | 2.675  | 2.435 | 2.435 |
| 1570585_at  | <i>LOC196264</i>   | 3.07   | 2.8   | 2.78  |

|              |                 |        |        |        |
|--------------|-----------------|--------|--------|--------|
| 229486_s_at  | <i>TMEM132A</i> | 2.605  | 2.365  | 2.365  |
| 242182_x_at  | <i>ITCH</i>     | 3.945  | 3.595  | 3.585  |
| 215804_at    | <i>EPHA1</i>    | 2.595  | 2.365  | 2.355  |
| 1552787_at   | <i>HELB</i>     | 3.15   | 2.88   | 2.85   |
| 1553868_a_at | <i>C5orf36</i>  | 3.58   | 3.26   | 3.26   |
| 1553074_at   | <i>ASB11</i>    | 2.585  | 2.355  | 2.345  |
| 1559807_at   | <i>SERF1A</i>   | 2.815  | 2.555  | 2.555  |
| 214400_at    | <i>INSL3</i>    | 2.525  | 2.305  | 2.295  |
| 1569714_at   | <i>ZFYVE20</i>  | 2.985  | 2.725  | 2.715  |
| 219018_s_at  | <i>C14orf65</i> | 7.425  | 6.745  | 6.775  |
| 236450_at    | <i>TARSL2</i>   | 2.405  | 2.185  | 2.185  |
| 225054_x_at  | <i>AMZ2</i>     | 3.075  | 2.805  | 2.785  |
| 233367_at    | <i>LIFR</i>     | 3.205  | 2.935  | 2.915  |
| 243517_at    | <i>NA</i>       | 2.595  | 2.355  | 2.355  |
| 226022_at    | <i>SASH1</i>    | 13.245 | 12.005 | 12.115 |
| 223860_at    | <i>NA</i>       | 2.525  | 2.305  | 2.305  |
| 208642_s_at  | <i>XRCC5</i>    | 10.51  | 9.59   | 9.55   |
| 1564272_a_at | <i>KLHDC1</i>   | 3.39   | 3.1    | 3.07   |
| 210761_s_at  | <i>GRB7</i>     | 2.365  | 2.145  | 2.155  |
| 202229_s_at  | <i>CHERP</i>    | 2.375  | 2.155  | 2.165  |
| 235006_at    | <i>MGC13017</i> | 4.105  | 3.725  | 3.755  |
| 226906_s_at  | <i>ARHGAP9</i>  | 3.255  | 2.975  | 2.945  |
| 244293_at    | <i>NA</i>       | 3.36   | 3.07   | 3.05   |
| 241697_at    | <i>NA</i>       | 2.44   | 2.23   | 2.21   |
| 229144_at    | <i>KIAA1026</i> | 7.015  | 6.425  | 6.355  |
| 239234_at    | <i>OGDH</i>     | 3.535  | 3.235  | 3.205  |
| 235748_s_at  | <i>MTHFD2L</i>  | 3.28   | 2.98   | 2.98   |
| 208375_at    | <i>IFNA1</i>    | 2.745  | 2.505  | 2.495  |
| 201551_s_at  | <i>LAMP1</i>    | 2.38   | 2.16   | 2.17   |
| 207236_at    | <i>ZNF345</i>   | 2.97   | 2.71   | 2.71   |
| 1569481_s_at | <i>SNX22</i>    | 2.46   | 2.24   | 2.24   |

|             |                  |        |       |       |
|-------------|------------------|--------|-------|-------|
| 241969_at   | <i>ARID5B</i>    | 2.875  | 2.625 | 2.605 |
| 227319_at   | <i>NA</i>        | 8.72   | 7.91  | 7.97  |
| 229560_at   | <i>TMSB4X</i>    | 2.595  | 2.355 | 2.365 |
| 1561099_at  | <i>FLJ32756</i>  | 2.805  | 2.555 | 2.545 |
| 215760_s_at | <i>SBNO2</i>     | 2.69   | 2.44  | 2.46  |
| 1552338_at  | <i>GSC</i>       | 2.105  | 1.915 | 1.925 |
| 217536_x_at | <i>NA</i>        | 3.77   | 3.42  | 3.45  |
| 1562776_at  | <i>LOC339807</i> | 2.64   | 2.41  | 2.4   |
| 238373_at   | <i>HIFNT</i>     | 2.68   | 2.44  | 2.44  |
| 213014_at   | <i>MAPK8IP1</i>  | 2.295  | 2.095 | 2.085 |
| 229046_s_at | <i>PLEKHB1</i>   | 2.61   | 2.38  | 2.37  |
| 237759_at   | <i>CD48</i>      | 3.225  | 2.945 | 2.945 |
| 1557366_at  | <i>FLJ36492</i>  | 3.655  | 3.345 | 3.325 |
| 204486_at   | <i>KCNQ1</i>     | 2.9    | 2.65  | 2.63  |
| 224522_s_at | <i>DCAKD</i>     | 2.495  | 2.275 | 2.275 |
| 203277_at   | <i>DFFA</i>      | 5.6    | 5.1   | 5.1   |
| 216238_s_at | <i>FGB</i>       | 2.775  | 2.535 | 2.525 |
| 221774_x_at | <i>FAM48A</i>    | 6.49   | 5.91  | 5.92  |
| 216456_at   | <i>PCDH9</i>     | 2.345  | 2.145 | 2.135 |
| 211605_s_at | <i>RARA</i>      | 2.72   | 2.48  | 2.48  |
| 239083_at   | <i>ZNF786</i>    | 3.41   | 3.11  | 3.1   |
| 217772_s_at | <i>MTCH2</i>     | 10.935 | 9.955 | 9.965 |
| 229358_at   | <i>IHH</i>       | 2.4    | 2.19  | 2.18  |
| 236859_at   | <i>RUNX2</i>     | 3.3    | 3.02  | 2.99  |
| 217063_x_at | <i>TRA@</i>      | 2.72   | 2.48  | 2.48  |
| 232717_at   | <i>KALRN</i>     | 2.52   | 2.3   | 2.3   |
| 1561658_at  | <i>PPP2R2B</i>   | 2.625  | 2.385 | 2.385 |
| 244060_at   | <i>ADD2</i>      | 2.47   | 2.25  | 2.25  |
| 214542_x_at | <i>HIST1H2AI</i> | 2.52   | 2.3   | 2.3   |
| 239944_at   | <i>SERF1A</i>    | 2.475  | 2.255 | 2.255 |
| 202712_s_at | <i>CKMT1B</i>    | 2.53   | 2.31  | 2.3   |



|              |                  |        |        |        |
|--------------|------------------|--------|--------|--------|
| 210360_s_at  | <i>MTSSI</i>     | 2.345  | 2.145  | 2.145  |
| 1563121_at   | <i>NA</i>        | 2.29   | 2.09   | 2.09   |
| 216909_at    | <i>RRP12</i>     | 2.505  | 2.285  | 2.285  |
| 45714_at     | <i>HCFC1R1</i>   | 4.365  | 3.965  | 3.995  |
| 1559603_at   | <i>GPR12</i>     | 2.405  | 2.185  | 2.195  |
| 213431_x_at  | <i>SFII</i>      | 4.655  | 4.235  | 4.245  |
| 200029_at    | <i>RPL19</i>     | 12.14  | 11.03  | 11.1   |
| 1561165_a_at | <i>DEFB108B</i>  | 3.095  | 2.825  | 2.815  |
| 229191_at    | <i>TBCD</i>      | 3.12   | 2.84   | 2.84   |
| 241247_at    | <i>NA</i>        | 2.71   | 2.47   | 2.47   |
| 241876_at    | <i>MDM4</i>      | 2.415  | 2.195  | 2.195  |
| 1566688_at   | <i>NA</i>        | 2.29   | 2.09   | 2.09   |
| 238721_at    | <i>MDH1B</i>     | 2.27   | 2.07   | 2.07   |
| 203752_s_at  | <i>JUND</i>      | 12.91  | 11.72  | 11.82  |
| 204912_at    | <i>IL10RA</i>    | 2.335  | 2.135  | 2.125  |
| 208272_at    | <i>RANBP3</i>    | 3.67   | 3.33   | 3.36   |
| 209932_s_at  | <i>DUT</i>       | 9.27   | 8.44   | 8.46   |
| 215017_s_at  | <i>FNBP1L</i>    | 10.9   | 9.93   | 9.95   |
| 210824_at    | <i>NA</i>        | 2.3    | 2.1    | 2.1    |
| 214938_x_at  | <i>HMGB1</i>     | 14.645 | 13.395 | 13.295 |
| 1554156_a_at | <i>WFDC8</i>     | 2.565  | 2.345  | 2.345  |
| 235888_at    | <i>NA</i>        | 2.905  | 2.655  | 2.645  |
| 204107_at    | <i>NFYA</i>      | 2.625  | 2.375  | 2.405  |
| 1569683_at   | <i>XYLB</i>      | 2.94   | 2.67   | 2.69   |
| 1562921_at   | <i>LOC646927</i> | 3.025  | 2.775  | 2.755  |
| 224100_s_at  | <i>DPYSL5</i>    | 2.565  | 2.345  | 2.335  |
| 231026_at    | <i>EFHC1</i>     | 2.19   | 1.99   | 1.99   |
| 221846_s_at  | <i>CASKIN2</i>   | 4.255  | 3.855  | 3.895  |
| 200608_s_at  | <i>RAD21</i>     | 11.685 | 10.705 | 10.615 |
| 242210_at    | <i>ZNF24</i>     | 2.415  | 2.195  | 2.205  |
| 224448_s_at  | <i>C6orf125</i>  | 8.57   | 7.79   | 7.83   |

|             |                  |       |       |       |
|-------------|------------------|-------|-------|-------|
| 234188_at   | <i>RAB38</i>     | 2.55  | 2.33  | 2.33  |
| 233695_s_at | <i>CECR2</i>     | 2.865 | 2.605 | 2.615 |
| 229815_at   | <i>NA</i>        | 3.845 | 3.515 | 3.495 |
| 230744_at   | <i>NA</i>        | 8.005 | 7.285 | 7.325 |
| 1559002_at  | <i>LOC340544</i> | 2.47  | 2.24  | 2.26  |
| 240788_at   | <i>ME1</i>       | 2.445 | 2.225 | 2.225 |
| 242077_x_at | <i>C6orf150</i>  | 3.6   | 3.27  | 3.29  |
| 234770_at   | <i>NA</i>        | 2.71  | 2.47  | 2.47  |
| 1552544_at  | <i>SERPINA12</i> | 3     | 2.74  | 2.73  |
| 210816_s_at | <i>CYB561</i>    | 2.135 | 1.955 | 1.945 |
| 239193_at   | <i>FUBP3</i>     | 2.605 | 2.375 | 2.385 |
| 229335_at   | <i>CADM4</i>     | 3.035 | 2.775 | 2.765 |
| 213784_at   | <i>RABL4</i>     | 2.23  | 2.03  | 2.03  |
| 1562546_at  | <i>NA</i>        | 2.98  | 2.73  | 2.71  |
| 244067_x_at | <i>ZADH2</i>     | 3.21  | 2.93  | 2.93  |
| 237199_at   | <i>TAF5L</i>     | 2.92  | 2.67  | 2.65  |
| 220695_at   | <i>NA</i>        | 2.375 | 2.175 | 2.175 |
| 216548_x_at | <i>HMG4L</i>     | 2.51  | 2.29  | 2.29  |
| 215490_at   | <i>C1orf69</i>   | 3.87  | 3.55  | 3.52  |
| 1569894_at  | <i>PPP2R3C</i>   | 3.385 | 3.095 | 3.075 |
| 217636_at   | <i>POLG</i>      | 2.615 | 2.395 | 2.385 |
| 209080_x_at | <i>TXNL2</i>     | 8.88  | 8.11  | 8.1   |
| 228249_at   | <i>C11orf74</i>  | 6.59  | 6     | 6.02  |
| 236061_at   | <i>PRDM15</i>    | 2.815 | 2.575 | 2.575 |
| 234095_at   | <i>ATP8B1</i>    | 2.91  | 2.65  | 2.65  |
| 241637_at   | <i>LOC645478</i> | 4.015 | 3.665 | 3.655 |
| 1561918_at  | <i>NA</i>        | 3.035 | 2.775 | 2.775 |
| 207145_at   | <i>GDF8</i>      | 3.155 | 2.895 | 2.865 |
| 235503_at   | <i>ASB5</i>      | 2.98  | 2.72  | 2.72  |
| 232246_at   | <i>KIAA1648</i>  | 2.24  | 2.04  | 2.04  |
| 241615_x_at | <i>CD55</i>      | 2.615 | 2.395 | 2.395 |

|              |           |        |        |        |
|--------------|-----------|--------|--------|--------|
| 215539_at    | NA        | 3.345  | 3.065  | 3.035  |
| 220952_s_at  | PLEKHA5   | 8.93   | 8.19   | 8.11   |
| 231689_at    | TRPM7     | 2.385  | 2.185  | 2.175  |
| 238527_at    | NA        | 2.905  | 2.655  | 2.635  |
| 231651_at    | ITGB3     | 2.91   | 2.66   | 2.65   |
| 242512_at    | MYO9A     | 4.61   | 4.19   | 4.23   |
| 1562697_at   | LOC339988 | 2.59   | 2.37   | 2.37   |
| 217486_s_at  | ZDHHC17   | 2.665  | 2.435  | 2.425  |
| 200902_at    | 15-Sep    | 13.86  | 12.71  | 12.6   |
| 228491_at    | KRT17     | 2.74   | 2.5    | 2.5    |
| 1557744_at   | MYH7B     | 2.58   | 2.36   | 2.35   |
| 221122_at    | HRASLS2   | 3.2    | 2.94   | 2.9    |
| 1559583_at   | CD276     | 2.585  | 2.365  | 2.365  |
| 231658_x_at  | RPL36     | 3.69   | 3.38   | 3.36   |
| 201737_s_at  | 6-Mar     | 10.87  | 9.91   | 9.95   |
| 1565657_at   | CMTM6     | 3.375  | 3.095  | 3.065  |
| 210660_at    | LILRA1    | 2.815  | 2.575  | 2.575  |
| 210438_x_at  | TROVE2    | 11.12  | 10.12  | 10.19  |
| 240620_at    | NA        | 2.615  | 2.395  | 2.385  |
| 1560630_at   | NA        | 2.335  | 2.135  | 2.135  |
| 1561015_at   | KLF3      | 2.465  | 2.245  | 2.245  |
| 237891_at    | MDM2      | 2.685  | 2.445  | 2.455  |
| 241331_at    | SKAP2     | 2.445  | 2.235  | 2.225  |
| 208662_s_at  | TTC3      | 13.355 | 12.155 | 12.245 |
| 217701_x_at  | ATRX      | 3.17   | 2.89   | 2.89   |
| 216190_x_at  | ITGB1     | 2.915  | 2.655  | 2.655  |
| 221866_at    | TFEB      | 3.18   | 2.9    | 2.9    |
| 231789_at    | PCDHB14   | 3.02   | 2.76   | 2.75   |
| 1557867_s_at | C9orf117  | 3      | 2.73   | 2.75   |
| 1568696_at   | ARMETL1   | 2.655  | 2.445  | 2.415  |
| 1567627_at   | CD74      | 2.505  | 2.285  | 2.285  |

|              |                  |        |        |        |
|--------------|------------------|--------|--------|--------|
| 223427_s_at  | <i>EPB41L4B</i>  | 3.045  | 2.785  | 2.785  |
| 1569876_at   | <i>C17orf57</i>  | 3.575  | 3.275  | 3.265  |
| 205349_at    | <i>GNAI5</i>     | 3.05   | 2.79   | 2.78   |
| 1557218_s_at | <i>FANCB</i>     | 2.955  | 2.705  | 2.695  |
| 210117_at    | <i>SPAG1</i>     | 2.955  | 2.685  | 2.715  |
| 1559653_at   | <i>GRTP1</i>     | 3.095  | 2.845  | 2.815  |
| 200026_at    | <i>RPL34</i>     | 12.87  | 11.72  | 11.79  |
| 217197_x_at  | <i>CG018</i>     | 2.55   | 2.33   | 2.33   |
| 230517_at    | <i>REPIN1</i>    | 2.465  | 2.255  | 2.245  |
| 1568892_at   | <i>NA</i>        | 2.975  | 2.725  | 2.705  |
| 217702_at    | <i>IL27RA</i>    | 2.7    | 2.47   | 2.46   |
| 202569_s_at  | <i>MARK3</i>     | 9.67   | 8.79   | 8.88   |
| 201795_at    | <i>LBR</i>       | 10.26  | 9.41   | 9.34   |
| 241977_s_at  | <i>RAB3C</i>     | 2.395  | 2.185  | 2.195  |
| 241555_at    | <i>NA</i>        | 2.655  | 2.435  | 2.425  |
| 212034_s_at  | <i>EXOC7</i>     | 9.425  | 8.615  | 8.595  |
| 221474_at    | <i>MRLC2</i>     | 12.125 | 11.025 | 11.145 |
| 241576_at    | <i>NA</i>        | 3.45   | 3.17   | 3.14   |
| 201050_at    | <i>PLD3</i>      | 5.79   | 5.3    | 5.28   |
| 200909_s_at  | <i>RPLP2</i>     | 10.305 | 9.445  | 9.395  |
| 1553254_at   | <i>MAGEE2</i>    | 2.77   | 2.53   | 2.53   |
| 1570200_at   | <i>HELB</i>      | 3.07   | 2.82   | 2.79   |
| 1569176_at   | <i>TMPRSS12</i>  | 2.385  | 2.185  | 2.175  |
| 200963_x_at  | <i>RPL31</i>     | 15.055 | 13.835 | 13.685 |
| 236002_at    | <i>RPS2</i>      | 3.02   | 2.76   | 2.76   |
| 231970_at    | <i>C14orf118</i> | 4      | 3.68   | 3.64   |
| 238588_at    | <i>CCNI</i>      | 4.32   | 3.94   | 3.95   |
| 201211_s_at  | <i>DDX3X</i>     | 3.185  | 2.915  | 2.905  |
| 1564883_a_at | <i>TASIR1</i>    | 2.275  | 2.075  | 2.085  |
| 240819_at    | <i>NA</i>        | 2.925  | 2.675  | 2.665  |
| 243325_at    | <i>GSTK1</i>     | 2.945  | 2.695  | 2.685  |

|              |                     |       |       |       |
|--------------|---------------------|-------|-------|-------|
| 207158_at    | <i>APOBEC1</i>      | 2.495 | 2.275 | 2.275 |
| 243696_at    | <i>KIAA0562</i>     | 3.185 | 2.915 | 2.905 |
| 229282_at    | <i>GATA6</i>        | 2.61  | 2.39  | 2.38  |
| 213849_s_at  | <i>PPP2R2B</i>      | 2.945 | 2.695 | 2.685 |
| 241149_at    | <i>KLHDC4</i>       | 2.32  | 2.12  | 2.12  |
| 215441_at    | <i>LOC728759</i>    | 3.135 | 2.885 | 2.855 |
| 224120_at    | <i>NA</i>           | 2.26  | 2.06  | 2.06  |
| 242439_s_at  | <i>ASXL1</i>        | 6.795 | 6.215 | 6.215 |
| 1557753_at   | <i>NA</i>           | 2.52  | 2.3   | 2.3   |
| 240277_at    | <i>SLC30A7</i>      | 10.65 | 9.74  | 9.73  |
| 244644_at    | <i>TMSB4X</i>       | 3.275 | 3.005 | 2.985 |
| 207573_x_at  | <i>ATP5L</i>        | 9.34  | 8.5   | 8.59  |
| 230573_at    | <i>SGK2</i>         | 3.06  | 2.8   | 2.8   |
| 1562300_at   | <i>SLC8A3</i>       | 3.395 | 3.105 | 3.095 |
| 229799_s_at  | <i>NCAMI</i>        | 2.59  | 2.37  | 2.37  |
| 205575_at    | <i>CIQL1</i>        | 3.355 | 3.075 | 3.065 |
| 1569685_at   | <i>NA</i>           | 2.39  | 2.19  | 2.19  |
| 44563_at     | <i>WDR79</i>        | 4.48  | 4.11  | 4.09  |
| 1566576_at   | <i>DPYSL5</i>       | 2.505 | 2.285 | 2.285 |
| 242432_at    | <i>LRRRC37A2</i>    | 3.245 | 2.975 | 2.955 |
| 231209_at    | <i>C14orf73</i>     | 2.765 | 2.525 | 2.525 |
| 211238_at    | <i>ADAM7</i>        | 2.715 | 2.485 | 2.475 |
| 200775_s_at  | <i>HNRPK</i>        | 12.35 | 11.24 | 11.34 |
| 237744_at    | <i>NA</i>           | 3.06  | 2.81  | 2.79  |
| 1558934_a_at | <i>NA</i>           | 3.695 | 3.365 | 3.395 |
| 212477_at    | <i>CENTB2</i>       | 2.535 | 2.315 | 2.315 |
| 216216_at    | <i>SLIT3</i>        | 2.975 | 2.705 | 2.725 |
| 1554103_at   | <i>NA</i>           | 3.105 | 2.845 | 2.845 |
| 37953_s_at   | <i>ACCN2</i>        | 2.42  | 2.22  | 2.21  |
| 216053_x_at  | <i>RP13-401N8.2</i> | 3.2   | 2.92  | 2.92  |
| 207770_x_at  | <i>CSH2</i>         | 2.43  | 2.22  | 2.23  |

|              |                     |        |        |        |
|--------------|---------------------|--------|--------|--------|
| 201450_s_at  | <i>TIAI</i>         | 9.86   | 9.01   | 9.03   |
| 234752_x_at  | <i>DMD</i>          | 3.325  | 3.055  | 3.035  |
| 232226_at    | <i>LRRC4C</i>       | 2.82   | 2.59   | 2.57   |
| 221113_s_at  | <i>WNT16</i>        | 2.505  | 2.295  | 2.285  |
| 233666_at    | <i>TMEM106B</i>     | 2.81   | 2.58   | 2.56   |
| 235307_at    | <i>LMTK2</i>        | 2.835  | 2.595  | 2.595  |
| 210883_x_at  | <i>EFNB3</i>        | 2.675  | 2.445  | 2.455  |
| 1554696_s_at | <i>TYMS</i>         | 2.605  | 2.385  | 2.385  |
| 243979_at    | <i>NA</i>           | 2.665  | 2.445  | 2.435  |
| 210848_at    | <i>NA</i>           | 2.915  | 2.675  | 2.665  |
| 209740_s_at  | <i>PNPLA4</i>       | 3.32   | 3.04   | 3.04   |
| 1558523_at   | <i>C6orf60</i>      | 3.05   | 2.79   | 2.79   |
| 232993_at    | <i>SYNJI</i>        | 3.52   | 3.23   | 3.22   |
| 237204_at    | <i>DPHI</i>         | 2.735  | 2.495  | 2.495  |
| 228808_s_at  | <i>LOXL2</i>        | 2.17   | 1.99   | 1.99   |
| 201044_x_at  | <i>DUSP1</i>        | 3.825  | 3.505  | 3.495  |
| 1555568_at   | <i>MGC22265</i>     | 3.04   | 2.79   | 2.77   |
| 1553533_at   | <i>JPHI</i>         | 2.715  | 2.485  | 2.475  |
| 225463_x_at  | <i>LOC653519</i>    | 7.345  | 6.745  | 6.705  |
| 1561064_a_at | <i>NA</i>           | 2.635  | 2.415  | 2.405  |
| 240843_at    | <i>PTPN2</i>        | 4.7    | 4.28   | 4.32   |
| 242626_at    | <i>RP5-875H10.1</i> | 2.455  | 2.245  | 2.265  |
| 229522_at    | <i>HSPC105</i>      | 2.575  | 2.365  | 2.355  |
| 1557386_at   | <i>LCT</i>          | 3.07   | 2.82   | 2.8    |
| 1554272_at   | <i>LRAP</i>         | 2.89   | 2.65   | 2.64   |
| 234665_x_at  | <i>HHLA3</i>        | 2.665  | 2.445  | 2.435  |
| 1557000_at   | <i>ESPNL</i>        | 2.555  | 2.335  | 2.345  |
| 208956_x_at  | <i>DUT</i>          | 12.165 | 11.125 | 11.135 |
| 207575_at    | <i>GOLGA</i>        | 2.62   | 2.4    | 2.4    |
| 207023_x_at  | <i>KRT10</i>        | 11.02  | 10.06  | 10.11  |
| 240010_at    | <i>LMX1B</i>        | 2.82   | 2.59   | 2.57   |

|              |                  |        |        |        |
|--------------|------------------|--------|--------|--------|
| 239362_at    | <i>NAPA</i>      | 2.705  | 2.485  | 2.475  |
| 205371_s_at  | <i>DBT</i>       | 3.61   | 3.31   | 3.3    |
| 1560977_a_at | <i>BCL2L13</i>   | 2.64   | 2.42   | 2.42   |
| 1561079_at   | <i>ANKRD28</i>   | 3.3    | 3.03   | 3.01   |
| 208877_at    | <i>PAK2</i>      | 12.56  | 11.55  | 11.45  |
| 207527_at    | <i>KCNJ9</i>     | 2.54   | 2.33   | 2.32   |
| 227168_at    | <i>FLJ25967</i>  | 6.11   | 5.6    | 5.58   |
| 1566208_at   | <i>TCEA1</i>     | 2.505  | 2.295  | 2.285  |
| 1555082_a_at | <i>NEK11</i>     | 2.785  | 2.555  | 2.535  |
| 226715_at    | <i>FOXK1</i>     | 11.35  | 10.34  | 10.44  |
| 213210_at    | <i>TAF6L</i>     | 2.82   | 2.59   | 2.57   |
| 1560070_at   | <i>NA</i>        | 2.575  | 2.355  | 2.355  |
| 223372_at    | <i>DNAJC4</i>    | 2.775  | 2.545  | 2.535  |
| 236499_at    | <i>Clorf86</i>   | 4.215  | 3.835  | 3.875  |
| 1560639_at   | <i>STMN3</i>     | 2.745  | 2.505  | 2.505  |
| 233701_at    | <i>NRP1</i>      | 6.435  | 5.895  | 5.885  |
| 201701_s_at  | <i>PGRMC2</i>    | 12.175 | 11.145 | 11.155 |
| 1564729_at   | <i>NA</i>        | 2.63   | 2.41   | 2.41   |
| 202942_at    | <i>ETFB</i>      | 7.985  | 7.345  | 7.275  |
| 230093_at    | <i>TSGA2</i>     | 3.045  | 2.785  | 2.785  |
| 213728_at    | <i>LAMP1</i>     | 12.96  | 11.86  | 11.87  |
| 226303_at    | <i>PGM5</i>      | 3.135  | 2.875  | 2.875  |
| 1552842_at   | <i>HS6ST3</i>    | 2.515  | 2.295  | 2.295  |
| 233711_at    | <i>LOC645256</i> | 3.13   | 2.88   | 2.85   |
| 1555180_at   | <i>NA</i>        | 2.505  | 2.295  | 2.285  |
| 230555_s_at  | <i>THRAP6</i>    | 2.38   | 2.18   | 2.18   |
| 206166_s_at  | <i>CLCA2</i>     | 2.95   | 2.71   | 2.71   |
| 208695_s_at  | <i>RPL39</i>     | 15.67  | 14.4   | 14.3   |
| 230248_x_at  | <i>NA</i>        | 3.08   | 2.82   | 2.82   |
| 1554737_at   | <i>FBN2</i>      | 2.475  | 2.265  | 2.275  |
| 216365_x_at  | <i>IGL@</i>      | 2.285  | 2.095  | 2.085  |

|              |                 |       |       |       |
|--------------|-----------------|-------|-------|-------|
| 234671_at    | <i>KRTAP4-2</i> | 2.645 | 2.425 | 2.425 |
| 228784_at    | <i>ST3GAL2</i>  | 2.52  | 2.31  | 2.3   |
| 1569439_at   | <i>NEDD4</i>    | 2.88  | 2.64  | 2.64  |
| 240204_at    | <i>SNRPN</i>    | 2.83  | 2.6   | 2.58  |
| 234956_at    | <i>LOC93444</i> | 2.85  | 2.61  | 2.61  |
| 241341_at    | <i>NA</i>       | 2.61  | 2.39  | 2.39  |
| 1569864_at   | <i>SERAC1</i>   | 2.79  | 2.56  | 2.55  |
| 203862_s at  | <i>ACTN2</i>    | 3.08  | 2.82  | 2.82  |
| 1562712_at   | <i>NA</i>       | 2.585 | 2.365 | 2.365 |
| 217471_at    | <i>NA</i>       | 2.56  | 2.34  | 2.34  |
| 208693_s at  | <i>GARS</i>     | 13.22 | 12.11 | 12.12 |
| 206527_at    | <i>ABAT</i>     | 2.675 | 2.455 | 2.445 |
| 210929_s at  | <i>AHSG</i>     | 3.25  | 2.97  | 2.98  |
| 1562371_s at | <i>MGC26733</i> | 2.735 | 2.515 | 2.505 |
| 231594_at    | <i>NA</i>       | 2.555 | 2.345 | 2.335 |
| 203052_at    | <i>C2</i>       | 2.66  | 2.44  | 2.44  |
| 243774_at    | <i>MUC20</i>    | 3.52  | 3.23  | 3.21  |
| 230456_at    | <i>OAF</i>      | 2.67  | 2.45  | 2.45  |
| 216712_at    | <i>TMEM132A</i> | 2.82  | 2.58  | 2.58  |
| 1554722_at   | <i>TRPM3</i>    | 3.135 | 2.885 | 2.865 |
| 206005_s at  | <i>KIAA1009</i> | 3.865 | 3.525 | 3.565 |
| 1557478_at   | <i>KIAA1505</i> | 2.9   | 2.65  | 2.66  |
| 202457_s at  | <i>PPP3CA</i>   | 12.23 | 11.18 | 11.24 |
| 1558448_a at | <i>JMJD2B</i>   | 2.955 | 2.725 | 2.705 |
| 213231_at    | <i>DMWD</i>     | 2.9   | 2.66  | 2.66  |
| 217191_x at  | <i>NA</i>       | 3.32  | 3.06  | 3.03  |
| 1554310_a at | <i>EIF4G3</i>   | 2.695 | 2.475 | 2.475 |
| 213484_at    | <i>NA</i>       | 2.685 | 2.465 | 2.455 |
| 211369_at    | <i>NA</i>       | 3.295 | 3.025 | 3.015 |
| 239900_x at  | <i>NA</i>       | 3.69  | 3.38  | 3.39  |
| 229156_s at  | <i>ABPI</i>     | 2.86  | 2.63  | 2.61  |



|              |                  |       |       |       |
|--------------|------------------|-------|-------|-------|
| 212614_at    | <i>ARID5B</i>    | 12.01 | 11    | 11.02 |
| 221149_at    | <i>GPR77</i>     | 2.45  | 2.25  | 2.25  |
| 240068_at    | <i>C21orf130</i> | 3.165 | 2.905 | 2.905 |
| 234542_at    | <i>ARHGEF12</i>  | 2.485 | 2.275 | 2.285 |
| 1566168_at   | <i>LOC729986</i> | 2.43  | 2.23  | 2.23  |
| 1555004_a_at | <i>RBL1</i>      | 2.7   | 2.48  | 2.47  |
| 240224_at    | <i>PRDM10</i>    | 2.42  | 2.22  | 2.22  |
| 237343_at    | <i>NA</i>        | 2.465 | 2.265 | 2.255 |
| 1561362_at   | <i>NA</i>        | 3.765 | 3.445 | 3.455 |
| 211893_x_at  | <i>CD6</i>       | 2.535 | 2.325 | 2.315 |
| 230671_at    | <i>LOC389257</i> | 3.515 | 3.225 | 3.215 |
| 210637_at    | <i>TACRI</i>     | 2.235 | 2.055 | 2.055 |
| 1560209_at   | <i>NA</i>        | 3.695 | 3.405 | 3.375 |
| 214284_s_at  | <i>FGF18</i>     | 2.235 | 2.045 | 2.055 |
| 238782_at    | <i>NA</i>        | 3.795 | 3.465 | 3.485 |
| 236036_at    | <i>NA</i>        | 2.585 | 2.375 | 2.355 |
| 235628_x_at  | <i>FLJ33630</i>  | 3.945 | 3.615 | 3.625 |
| 238409_x_at  | <i>OXR1</i>      | 2.46  | 2.25  | 2.26  |
| 237659_at    | <i>FLJ40288</i>  | 2.225 | 2.045 | 2.045 |
| 1557698_at   | <i>CBWD1</i>     | 3.35  | 3.08  | 3.07  |
| 1558608_a_at | <i>PAPPA</i>     | 3.525 | 3.245 | 3.215 |
| 225917_at    | <i>NA</i>        | 9.87  | 9.03  | 9.08  |
| 213687_s_at  | <i>RPL35A</i>    | 10.23 | 9.34  | 9.43  |
| 1555688_s_at | <i>SLA2</i>      | 2.645 | 2.435 | 2.425 |
| 1561756_at   | <i>NA</i>        | 2.48  | 2.28  | 2.28  |
| 242229_at    | <i>NAPE-PLD</i>  | 4.365 | 4.015 | 3.995 |
| 223545_at    | <i>FANCD2</i>    | 2.7   | 2.49  | 2.47  |
| 221212_x_at  | <i>PBI</i>       | 3.66  | 3.37  | 3.35  |
| 238254_at    | <i>ZNF677</i>    | 2.92  | 2.68  | 2.68  |
| 1568648_a_at | <i>LOC730087</i> | 2.88  | 2.64  | 2.64  |
| 215798_at    | <i>ALDH1L1</i>   | 4.34  | 3.98  | 3.98  |

|              |                  |        |       |       |
|--------------|------------------|--------|-------|-------|
| 200050_at    | <i>ZNF146</i>    | 12.91  | 11.87 | 11.83 |
| 220644_at    | <i>C1orf197</i>  | 2.56   | 2.35  | 2.34  |
| 222152_at    | <i>PDCD6</i>     | 4.005  | 3.675 | 3.665 |
| 214044_at    | <i>RYR2</i>      | 2.8    | 2.57  | 2.56  |
| 1552615_at   | <i>ACACB</i>     | 6.12   | 5.64  | 5.59  |
| 226661_at    | <i>CDCA2</i>     | 6.675  | 6.135 | 6.125 |
| 220493_at    | <i>DMRT1</i>     | 2.785  | 2.565 | 2.555 |
| 209658_at    | <i>CDC16</i>     | 10.835 | 9.905 | 9.975 |
| 240455_at    | <i>NA</i>        | 3.075  | 2.815 | 2.825 |
| 212653_s_at  | <i>EHBP1</i>     | 11.15  | 10.21 | 10.25 |
| 205146_x_at  | <i>APBA3</i>     | 2.42   | 2.22  | 2.22  |
| 227321_at    | <i>GATS</i>      | 2.63   | 2.41  | 2.41  |
| 243987_at    | <i>NA</i>        | 2.63   | 2.42  | 2.41  |
| 240659_x_at  | <i>C14orf106</i> | 3.72   | 3.42  | 3.41  |
| 202502_at    | <i>ACADM</i>     | 9.23   | 8.48  | 8.46  |
| 1557495_at   | <i>NA</i>        | 3.755  | 3.465 | 3.435 |
| 1560618_at   | <i>NA</i>        | 2.525  | 2.315 | 2.325 |
| 238291_at    | <i>KIAA0776</i>  | 3.35   | 3.07  | 3.07  |
| 1556932_at   | <i>NA</i>        | 2.43   | 2.23  | 2.23  |
| 1553127_a_at | <i>RNF168</i>    | 3.45   | 3.17  | 3.17  |
| 215397_x_at  | <i>THSD4</i>     | 3.21   | 2.94  | 2.95  |
| 212971_at    | <i>CARS</i>      | 12.18  | 11.16 | 11.2  |
| 234293_x_at  | <i>NA</i>        | 2.605  | 2.395 | 2.385 |
| 239197_s_at  | <i>EZHI</i>      | 4.66   | 4.28  | 4.28  |
| 218835_at    | <i>SFTPA2</i>    | 2.44   | 2.24  | 2.24  |
| 205208_at    | <i>ALDH1L1</i>   | 2.63   | 2.41  | 2.41  |
| 234316_x_at  | <i>KLK12</i>     | 2.69   | 2.47  | 2.46  |
| 239117_at    | <i>LOC643950</i> | 2.285  | 2.105 | 2.105 |
| 1553103_at   | <i>NFX1</i>      | 9.575  | 8.825 | 8.765 |
| 210546_x_at  | <i>CTAG1B</i>    | 2.565  | 2.355 | 2.345 |
| 1553266_at   | <i>CNOT6L</i>    | 3.025  | 2.795 | 2.765 |

|              |                  |        |       |       |
|--------------|------------------|--------|-------|-------|
| 233103_at    | <i>NA</i>        | 2.535  | 2.335 | 2.335 |
| 1556038_at   | <i>NA</i>        | 3.015  | 2.785 | 2.755 |
| 231010_at    | <i>C4orf16</i>   | 2.38   | 2.18  | 2.19  |
| 232570_s_at  | <i>ADAM33</i>    | 4.23   | 3.87  | 3.9   |
| 1555980_a_at | <i>FLJ39609</i>  | 3.105  | 2.855 | 2.845 |
| 207100_s_at  | <i>VAMP1</i>     | 2.995  | 2.745 | 2.765 |
| 202217_at    | <i>C21orf33</i>  | 10.99  | 10.14 | 10.04 |
| 223631_s_at  | <i>C19orf33</i>  | 3.295  | 3.045 | 3.015 |
| 242249_at    | <i>NA</i>        | 2.865  | 2.625 | 2.625 |
| 221607_x_at  | <i>ACTG1</i>     | 15.08  | 13.77 | 13.91 |
| 238019_at    | <i>LRG1</i>      | 2.755  | 2.545 | 2.525 |
| 244891_x_at  | <i>PVT1</i>      | 2.75   | 2.53  | 2.53  |
| 1555978_s_at | <i>LOC727918</i> | 2.67   | 2.46  | 2.44  |
| 206285_at    | <i>NPHP1</i>     | 2.805  | 2.585 | 2.575 |
| 241232_x_at  | <i>NA</i>        | 2.635  | 2.425 | 2.415 |
| 219058_x_at  | <i>TINAGL1</i>   | 3.25   | 2.99  | 2.98  |
| 242788_at    | <i>JMJD2D</i>    | 2.66   | 2.44  | 2.44  |
| 243631_at    | <i>HSMPP8</i>    | 5.285  | 4.855 | 4.845 |
| 216767_at    | <i>PARVA</i>     | 2.66   | 2.44  | 2.44  |
| 205742_at    | <i>TNNI3</i>     | 2.495  | 2.295 | 2.295 |
| 228650_at    | <i>NA</i>        | 9.09   | 8.32  | 8.38  |
| 229942_at    | <i>BNC2</i>      | 6.975  | 6.405 | 6.415 |
| 206297_at    | <i>CTRC</i>      | 4.025  | 3.705 | 3.695 |
| 238643_at    | <i>NBL1</i>      | 2.16   | 1.98  | 1.98  |
| 207647_at    | <i>CDY1</i>      | 3.085  | 2.835 | 2.825 |
| 215682_at    | <i>LOC440792</i> | 2.25   | 2.07  | 2.06  |
| 206815_at    | <i>SPAG8</i>     | 3.42   | 3.15  | 3.13  |
| 235849_at    | <i>SCARA5</i>    | 2.27   | 2.09  | 2.09  |
| 213980_s_at  | <i>CTBP1</i>     | 10.305 | 9.425 | 9.505 |
| 211917_s_at  | <i>PRLR</i>      | 2.68   | 2.46  | 2.46  |
| 237359_at    | <i>NA</i>        | 2.555  | 2.355 | 2.345 |

|              |                  |       |       |       |
|--------------|------------------|-------|-------|-------|
| 1555774_at   | <i>ZARI</i>      | 2.86  | 2.63  | 2.62  |
| 235584_at    | <i>LOC285033</i> | 2.51  | 2.31  | 2.31  |
| 203601_s_at  | <i>ZBTB17</i>    | 3.98  | 3.66  | 3.66  |
| 1566339_at   | <i>CHD8</i>      | 3.105 | 2.855 | 2.845 |
| 229661_at    | <i>SALL4</i>     | 2.555 | 2.355 | 2.355 |
| 233035_at    | <i>NA</i>        | 3.055 | 2.805 | 2.825 |
| 32540_at     | <i>PPP3CC</i>    | 2.73  | 2.5   | 2.51  |
| 214448_x_at  | <i>NFKBIB</i>    | 6.225 | 5.715 | 5.725 |
| 226482_s_at  | <i>FIIR</i>      | 2.7   | 2.48  | 2.48  |
| 219693_at    | <i>AGPAT4</i>    | 2.44  | 2.25  | 2.23  |
| 231734_at    | <i>RBP2</i>      | 2.535 | 2.335 | 2.335 |
| 244847_at    | <i>PKD2L2</i>    | 3.24  | 2.97  | 2.99  |
| 213539_at    | <i>CD3D</i>      | 2.46  | 2.26  | 2.26  |
| 1554631_at   | <i>ATM</i>       | 2.23  | 2.05  | 2.05  |
| 219534_x_at  | <i>CDKN1C</i>    | 2.885 | 2.645 | 2.655 |
| 209766_at    | <i>PRDX3</i>     | 2.415 | 2.215 | 2.225 |
| 237810_at    | <i>CLDN6</i>     | 2.755 | 2.545 | 2.525 |
| 242970_at    | <i>DIP2B</i>     | 2.915 | 2.675 | 2.675 |
| 232460_at    | <i>NA</i>        | 2.58  | 2.38  | 2.37  |
| 241562_x_at  | <i>NA</i>        | 2.94  | 2.71  | 2.7   |
| 205563_at    | <i>KISS1</i>     | 2.435 | 2.245 | 2.235 |
| 236604_at    | <i>BAHCC1</i>    | 2.71  | 2.49  | 2.49  |
| 229684_s_at  | <i>ZNF644</i>    | 2.635 | 2.415 | 2.415 |
| 207955_at    | <i>CCL27</i>     | 3.14  | 2.88  | 2.89  |
| 215304_at    | <i>THSD4</i>     | 2.74  | 2.52  | 2.52  |
| 1555186_at   | <i>CDKN1A</i>    | 2.29  | 2.11  | 2.1   |
| 1557816_a_at | <i>NA</i>        | 2.68  | 2.46  | 2.46  |
| 1559504_at   | <i>FLJ35409</i>  | 3.325 | 3.065 | 3.055 |
| 240279_at    | <i>WDFY2</i>     | 3.64  | 3.35  | 3.33  |
| 1559443_s_at | <i>LOC283888</i> | 2.69  | 2.48  | 2.46  |
| 239094_at    | <i>NA</i>        | 2.51  | 2.31  | 2.31  |

|              |                  |        |        |        |
|--------------|------------------|--------|--------|--------|
| 233676_at    | <i>GPC6</i>      | 2.97   | 2.73   | 2.73   |
| 1560298_at   | <i>NA</i>        | 2.73   | 2.51   | 2.51   |
| 218356_at    | <i>FTSJ2</i>     | 9.565  | 8.835  | 8.765  |
| 215061_at    | <i>LOC399818</i> | 3.675  | 3.395  | 3.365  |
| 201254_x_at  | <i>RPS6</i>      | 12.995 | 11.925 | 11.975 |
| 1554518_at   | <i>GSTCD</i>     | 4.79   | 4.41   | 4.41   |
| 1556768_at   | <i>NA</i>        | 2.56   | 2.35   | 2.36   |
| 221610_s_at  | <i>STAP2</i>     | 2.41   | 2.22   | 2.21   |
| 230518_at    | <i>EVAI</i>      | 3.075  | 2.825  | 2.835  |
| 210397_at    | <i>DEFB1</i>     | 2.885  | 2.655  | 2.645  |
| 204991_s_at  | <i>NF2</i>       | 3.105  | 2.865  | 2.855  |
| 222098_s_at  | <i>MZF1</i>      | 3.04   | 2.8    | 2.8    |
| 207173_x_at  | <i>CDH11</i>     | 13.535 | 12.415 | 12.485 |
| 215158_s_at  | <i>DEDD</i>      | 9.53   | 8.77   | 8.76   |
| 215737_x_at  | <i>USF2</i>      | 7.46   | 6.84   | 6.88   |
| 1554393_a_at | <i>ADC</i>       | 2.525  | 2.325  | 2.325  |
| 237950_s_at  | <i>NA</i>        | 3.075  | 2.845  | 2.815  |
| 243846_x_at  | <i>FLJ32810</i>  | 3.265  | 2.995  | 3.005  |
| 231702_at    | <i>TDO2</i>      | 2.395  | 2.205  | 2.195  |
| 207768_at    | <i>EGR4</i>      | 2.68   | 2.46   | 2.46   |
| 229811_at    | <i>NA</i>        | 2.835  | 2.615  | 2.615  |
| 1553179_at   | <i>ADAMTS19</i>  | 2.475  | 2.275  | 2.275  |
| 1566987_s_at | <i>LOC728850</i> | 3.19   | 2.93   | 2.94   |
| 1562470_at   | <i>C1orf83</i>   | 2.54   | 2.34   | 2.34   |
| 220659_s_at  | <i>C7orf43</i>   | 5.99   | 5.51   | 5.51   |
| 230743_at    | <i>HOXB5</i>     | 3.54   | 3.26   | 3.25   |
| 213945_s_at  | <i>NUP210</i>    | 3.02   | 2.78   | 2.78   |
| 1553263_at   | <i>USH1G</i>     | 2.53   | 2.32   | 2.34   |
| 233458_at    | <i>POLR3E</i>    | 2.295  | 2.115  | 2.115  |
| 229945_at    | <i>CYHR1</i>     | 2.615  | 2.415  | 2.405  |
| 214257_s_at  | <i>SEC22B</i>    | 15.3   | 14.04  | 14.12  |

|              |                     |        |        |        |
|--------------|---------------------|--------|--------|--------|
| 243348_at    | <i>WDFY1</i>        | 2.795  | 2.565  | 2.575  |
| 1570414_x_at | <i>FLJ13197</i>     | 2.335  | 2.145  | 2.155  |
| 219794_at    | <i>VPS53</i>        | 2.605  | 2.405  | 2.395  |
| 209919_x_at  | <i>GGT1</i>         | 3.32   | 3.06   | 3.05   |
| 212772_s_at  | <i>ABCA2</i>        | 3.08   | 2.84   | 2.83   |
| 219309_at    | <i>CTA-216E10.6</i> | 2.595  | 2.405  | 2.385  |
| 1564028_s_at | <i>FLJ40722</i>     | 2.47   | 2.28   | 2.27   |
| 240949_x_at  | <i>GALNT10</i>      | 3.24   | 2.99   | 2.97   |
| 202762_at    | <i>ROCK2</i>        | 11.525 | 10.605 | 10.605 |
| 224880_at    | <i>RALA</i>         | 13.625 | 12.585 | 12.505 |
| 242105_at    | <i>CCNE1</i>        | 2.51   | 2.31   | 2.31   |
| 223686_at    | <i>TPK1</i>         | 2.945  | 2.715  | 2.695  |
| 240487_at    | <i>NA</i>           | 2.695  | 2.485  | 2.475  |
| 210343_s_at  | <i>SLC22A6</i>      | 2.99   | 2.76   | 2.75   |
| 233082_at    | <i>ZNF630</i>       | 3.03   | 2.79   | 2.79   |
| 243895_x_at  | <i>SMAD2</i>        | 2.875  | 2.655  | 2.645  |
| 1554707_at   | <i>C9orf68</i>      | 3.07   | 2.84   | 2.82   |
| 205413_at    | <i>MPPED2</i>       | 2.645  | 2.435  | 2.425  |
| 221433_at    | <i>FGF21</i>        | 2.575  | 2.385  | 2.365  |
| 1556248_at   | <i>MYRIP</i>        | 2.925  | 2.695  | 2.685  |
| 1559990_at   | <i>CAMK1D</i>       | 2.955  | 2.715  | 2.715  |
| 1555214_a_at | <i>CLEC7A</i>       | 2.675  | 2.465  | 2.455  |
| 1566646_at   | <i>LOC149086</i>    | 5.29   | 4.87   | 4.87   |
| 213293_s_at  | <i>TRIM22</i>       | 9.84   | 9.08   | 9.03   |
| 1566426_at   | <i>SBF2</i>         | 2.845  | 2.615  | 2.625  |
| 232900_at    | <i>HERC2P7</i>      | 2.315  | 2.135  | 2.135  |
| 203948_s_at  | <i>MPO</i>          | 2.31   | 2.13   | 2.13   |
| 239800_at    | <i>NA</i>           | 3.03   | 2.79   | 2.79   |
| 237364_at    | <i>ZNF529</i>       | 3.52   | 3.23   | 3.25   |
| 238944_at    | <i>NA</i>           | 7.33   | 6.73   | 6.77   |
| 206780_at    | <i>GAD2</i>         | 2.71   | 2.5    | 2.48   |

|              |                  |        |        |        |
|--------------|------------------|--------|--------|--------|
| 244168_s_at  | <i>ULK4</i>      | 2.945  | 2.705  | 2.715  |
| 221180_at    | <i>YSK4</i>      | 2.57   | 2.37   | 2.37   |
| 211846_s_at  | <i>PVRL1</i>     | 2.435  | 2.245  | 2.225  |
| 233319_x_at  | <i>PHACTR4</i>   | 6.275  | 5.775  | 5.775  |
| 216938_x_at  | <i>DRD2</i>      | 2.52   | 2.32   | 2.32   |
| 1564590_a_at | <i>OFCC1</i>     | 2.54   | 2.34   | 2.34   |
| 211712_s_at  | <i>ANXA9</i>     | 2.47   | 2.27   | 2.27   |
| 1558594_at   | <i>LOC643382</i> | 2.5    | 2.3    | 2.3    |
| 214060_at    | <i>TAS2R5</i>    | 2.51   | 2.31   | 2.32   |
| 1563571_at   | <i>LOC285463</i> | 2.56   | 2.36   | 2.36   |
| 240198_at    | <i>NA</i>        | 2.365  | 2.185  | 2.175  |
| 224067_at    | <i>NA</i>        | 3.385  | 3.125  | 3.115  |
| 207244_x_at  | <i>CYP2A6</i>    | 4.37   | 4.03   | 4.02   |
| 226623_at    | <i>PHYHIPL</i>   | 2.76   | 2.54   | 2.54   |
| 224375_at    | <i>NA</i>        | 12.515 | 11.555 | 11.505 |
| 1564165_at   | <i>PRKRIP1</i>   | 4.5    | 4.15   | 4.14   |
| 217147_s_at  | <i>TRATI</i>     | 2.99   | 2.76   | 2.74   |
| 224424_x_at  | <i>LOC644773</i> | 2.395  | 2.215  | 2.205  |
| 238367_s_at  | <i>MGC33556</i>  | 2.76   | 2.54   | 2.54   |
| 239745_at    | <i>PAN3</i>      | 2.395  | 2.215  | 2.215  |
| 1564443_at   | <i>DLEU2</i>     | 2.395  | 2.215  | 2.205  |
| 216656_at    | <i>NA</i>        | 2.95   | 2.72   | 2.71   |
| 1555467_a_at | <i>CUGBPI</i>    | 2.83   | 2.61   | 2.6    |
| 230510_at    | <i>HSPB9</i>     | 2.58   | 2.38   | 2.38   |
| 206433_s_at  | <i>SPOCK3</i>    | 2.82   | 2.6    | 2.6    |
| 1555102_at   | <i>FGF7</i>      | 3.33   | 3.07   | 3.07   |
| 230727_at    | <i>PCGF2</i>     | 5.255  | 4.825  | 4.855  |
| 242962_at    | <i>NA</i>        | 4.165  | 3.835  | 3.845  |
| 207263_x_at  | <i>VEZT</i>      | 3.165  | 2.925  | 2.915  |
| 233913_at    | <i>WFDC10A</i>   | 2.645  | 2.445  | 2.435  |
| 222758_s_at  | <i>TMEM132A</i>  | 2.26   | 2.08   | 2.08   |

|              |                  |        |        |        |
|--------------|------------------|--------|--------|--------|
| 244017_at    | <i>JAZF1</i>     | 2.635  | 2.435  | 2.435  |
| 44673_at     | <i>SIGLEC1</i>   | 2.525  | 2.325  | 2.325  |
| 219846_at    | <i>GON4L</i>     | 2.8    | 2.58   | 2.58   |
| 1552779_a_at | <i>SLC44A5</i>   | 3.05   | 2.82   | 2.81   |
| 211230_s_at  | <i>PIK3CD</i>    | 2.745  | 2.525  | 2.535  |
| 214562_at    | <i>HIST1H4L</i>  | 2.465  | 2.265  | 2.275  |
| 202393_s_at  | <i>KLF10</i>     | 11.305 | 10.475 | 10.375 |
| 1557813_at   | <i>SSBP2</i>     | 2.205  | 2.025  | 2.035  |
| 241337_at    | <i>LOC728347</i> | 2.705  | 2.495  | 2.485  |
| 1556149_at   | <i>COMT</i>      | 2.31   | 2.13   | 2.13   |
| 217671_at    | <i>RFX3</i>      | 2.505  | 2.305  | 2.315  |
| 1553258_at   | <i>FLJ30679</i>  | 2.51   | 2.31   | 2.31   |
| 208370_s_at  | <i>DSCR1</i>     | 13.11  | 12.13  | 12.05  |
| 218558_s_at  | <i>MRPL39</i>    | 8.815  | 8.095  | 8.165  |
| 216316_x_at  | <i>GK</i>        | 2.49   | 2.29   | 2.3    |
| 206466_at    | <i>ACSBG1</i>    | 4.055  | 3.745  | 3.735  |
| 1565562_at   | <i>FLJ21687</i>  | 5.795  | 5.325  | 5.355  |
| 222608_s_at  | <i>ANLN</i>      | 9.7    | 8.97   | 8.92   |
| 1552370_at   | <i>C4orf33</i>   | 2.865  | 2.655  | 2.635  |
| 239826_at    | <i>C18orf45</i>  | 2.965  | 2.735  | 2.725  |
| 234253_at    | <i>NA</i>        | 2.975  | 2.745  | 2.725  |
| 1561336_at   | <i>DNASE1L3</i>  | 2.485  | 2.295  | 2.285  |
| 205814_at    | <i>GRM3</i>      | 2.495  | 2.295  | 2.295  |
| 227959_at    | <i>NA</i>        | 3.015  | 2.785  | 2.765  |
| 243876_at    | <i>FNBPI</i>     | 2.83   | 2.61   | 2.61   |
| 231289_at    | <i>NCOA1</i>     | 2.62   | 2.42   | 2.41   |
| 215313_x_at  | <i>HLA-A</i>     | 12.38  | 11.4   | 11.43  |
| 239746_at    | <i>KIAA1199</i>  | 2.685  | 2.485  | 2.475  |
| 217069_at    | <i>MLL4</i>      | 2.695  | 2.495  | 2.485  |
| 215711_s_at  | <i>WEE1</i>      | 2.415  | 2.225  | 2.235  |
| 230379_x_at  | <i>PRKD3</i>     | 9.06   | 8.32   | 8.4    |



|              |                  |        |        |        |
|--------------|------------------|--------|--------|--------|
| 204296_at    | <i>SLC4A5</i>    | 3.1    | 2.86   | 2.86   |
| 1566526_at   | <i>LOC283688</i> | 2.65   | 2.46   | 2.44   |
| 211921_x_at  | <i>PTMA</i>      | 15.425 | 14.265 | 14.195 |
| 200873_s_at  | <i>CCT8</i>      | 12.69  | 11.74  | 11.68  |
| 1568590_at   | <i>ARL3</i>      | 2.525  | 2.335  | 2.325  |
| 241648_at    | <i>ITSN2</i>     | 2.51   | 2.31   | 2.31   |
| 210130_s_at  | <i>TM7SF2</i>    | 2.385  | 2.205  | 2.205  |
| 244839_at    | <i>TTN</i>       | 3.07   | 2.84   | 2.82   |
| 1570529_at   | <i>KIAA0020</i>  | 3.32   | 3.07   | 3.05   |
| 207473_at    | <i>MLN</i>       | 2.385  | 2.205  | 2.205  |
| 205763_s_at  | <i>DDX18</i>     | 9.76   | 9.02   | 8.98   |
| 241532_at    | <i>RMND5A</i>    | 3.09   | 2.86   | 2.84   |
| 200066_at    | <i>IK</i>        | 9.465  | 8.755  | 8.705  |
| 207017_at    | <i>RAB27B</i>    | 3.14   | 2.91   | 2.89   |
| 217186_at    | <i>NA</i>        | 2.735  | 2.525  | 2.515  |
| 229937_x_at  | <i>LILRB1</i>    | 2.935  | 2.715  | 2.705  |
| 222371_at    | <i>PIAS1</i>     | 3.39   | 3.13   | 3.13   |
| 1560657_at   | <i>TIE1</i>      | 3.1    | 2.87   | 2.85   |
| 213583_x_at  | <i>EEF1A1</i>    | 15.655 | 14.505 | 14.395 |
| 203668_at    | <i>MAN2C1</i>    | 2.095  | 1.935  | 1.935  |
| 235800_at    | <i>HSPA12A</i>   | 3.575  | 3.295  | 3.295  |
| 1564372_s_at | <i>CASC2</i>     | 2.58   | 2.38   | 2.38   |
| 220376_at    | <i>LRRC19</i>    | 2.975  | 2.755  | 2.745  |
| 238860_at    | <i>C6orf130</i>  | 5.44   | 5.03   | 5.01   |
| 222973_at    | <i>UNC13B</i>    | 3.07   | 2.84   | 2.83   |
| 244364_at    | <i>MYO3A</i>     | 2.44   | 2.26   | 2.25   |
| 207886_s_at  | <i>CALCR</i>     | 3.04   | 2.81   | 2.8    |
| 210760_x_at  | <i>TRIP11</i>    | 2.555  | 2.355  | 2.355  |
| 216062_at    | <i>CD44</i>      | 3.205  | 2.975  | 2.955  |
| 231053_at    | <i>NA</i>        | 2.31   | 2.13   | 2.13   |
| 227571_at    | <i>NA</i>        | 2.39   | 2.21   | 2.21   |

|              |                  |        |        |        |
|--------------|------------------|--------|--------|--------|
| 201696_at    | <i>SFRS4</i>     | 9.4    | 8.67   | 8.68   |
| 243073_at    | <i>C6orf153</i>  | 2.505  | 2.305  | 2.305  |
| 241106_at    | <i>SDCCAG10</i>  | 3.1    | 2.85   | 2.87   |
| 219802_at    | <i>FLJ22028</i>  | 9.84   | 9.07   | 9.1    |
| 217129_at    | <i>NA</i>        | 2.37   | 2.19   | 2.19   |
| 1552783_at   | <i>ZNF417</i>    | 3.435  | 3.185  | 3.165  |
| 202618_s_at  | <i>MECP2</i>     | 3.02   | 2.77   | 2.79   |
| 231818_x_at  | <i>SLC20A2</i>   | 5.025  | 4.625  | 4.655  |
| 241188_at    | <i>PIP3-E</i>    | 3.08   | 2.85   | 2.83   |
| 1561096_at   | <i>LOC285419</i> | 2.525  | 2.325  | 2.325  |
| 217475_s_at  | <i>LIMK2</i>     | 2.715  | 2.515  | 2.505  |
| 219300_s_at  | <i>CNTNAP2</i>   | 3.23   | 2.99   | 2.99   |
| 230402_at    | <i>DUSP15</i>    | 3.205  | 2.975  | 2.955  |
| 242159_at    | <i>NA</i>        | 3.17   | 2.93   | 2.92   |
| 220563_s_at  | <i>SHANK1</i>    | 2.44   | 2.26   | 2.25   |
| 240171_at    | <i>PTGS1</i>     | 3.11   | 2.87   | 2.87   |
| 229761_at    | <i>LOC440173</i> | 4.19   | 3.87   | 3.87   |
| 200699_at    | <i>KDELR2</i>    | 13.165 | 12.155 | 12.165 |
| 239934_x_at  | <i>HOXA11S</i>   | 3.325  | 3.075  | 3.065  |
| 224097_s_at  | <i>FIIR</i>      | 3.72   | 3.45   | 3.43   |
| 216397_s_at  | <i>BOPI</i>      | 5.315  | 4.935  | 4.895  |
| 237112_at    | <i>FAM102B</i>   | 3.29   | 3.04   | 3.03   |
| 234285_at    | <i>SYNGAP1</i>   | 2.33   | 2.15   | 2.15   |
| 227248_at    | <i>PLEKHH3</i>   | 2.705  | 2.505  | 2.505  |
| 1554176_a_at | <i>C3orf33</i>   | 2.89   | 2.67   | 2.67   |
| 216635_at    | <i>NA</i>        | 2.525  | 2.315  | 2.335  |
| 1564654_at   | <i>COL4A6</i>    | 2.455  | 2.275  | 2.275  |
| 237427_at    | <i>NA</i>        | 2.62   | 2.42   | 2.42   |
| 234355_s_at  | <i>PTCHD2</i>    | 2.06   | 1.9    | 1.9    |
| 1560758_at   | <i>NA</i>        | 3.565  | 3.305  | 3.275  |
| 223190_s_at  | <i>MLL5</i>      | 10.845 | 10.035 | 10.005 |

|              |                  |        |        |        |
|--------------|------------------|--------|--------|--------|
| 217152_at    | <i>NA</i>        | 3.855  | 3.555  | 3.565  |
| 1561089_at   | <i>NA</i>        | 2.655  | 2.455  | 2.445  |
| 1558745_at   | <i>LOC92017</i>  | 2.73   | 2.53   | 2.52   |
| 226573_at    | <i>DIRAS1</i>    | 3.455  | 3.205  | 3.185  |
| 204380_s_at  | <i>FGFR3</i>     | 2.525  | 2.335  | 2.325  |
| 202163_s_at  | <i>CNOT8</i>     | 10.24  | 9.43   | 9.48   |
| 205850_s_at  | <i>GABRB3</i>    | 2.685  | 2.485  | 2.475  |
| 219666_at    | <i>MS4A6A</i>    | 2.295  | 2.115  | 2.115  |
| 1555694_a_at | <i>KCNIP3</i>    | 2.195  | 2.035  | 2.025  |
| 222177_s_at  | <i>SCAND2</i>    | 2.66   | 2.46   | 2.45   |
| 227561_at    | <i>DDR2</i>      | 12.14  | 11.27  | 11.16  |
| 1564475_s_at | <i>LOC728723</i> | 2.855  | 2.635  | 2.635  |
| 1563226_at   | <i>MGC15523</i>  | 2.54   | 2.34   | 2.34   |
| 239387_at    | <i>UVRAG</i>     | 3.045  | 2.815  | 2.805  |
| 219863_at    | <i>HERC5</i>     | 3      | 2.78   | 2.78   |
| 1569238_a_at | <i>RAPGEF2</i>   | 2.86   | 2.64   | 2.64   |
| 1558474_at   | <i>NA</i>        | 4.255  | 3.955  | 3.915  |
| 208674_x_at  | <i>DDOST</i>     | 11.505 | 10.585 | 10.675 |
| 223022_s_at  | <i>C6orf55</i>   | 9.375  | 8.635  | 8.685  |
| 200006_at    | <i>PARK7</i>     | 13.005 | 11.995 | 12.045 |
| 229676_at    | <i>PAPD1</i>     | 11.415 | 10.515 | 10.595 |
| 236039_at    | <i>LYPD5</i>     | 2.37   | 2.19   | 2.19   |
| 210990_s_at  | <i>LAMA4</i>     | 2.38   | 2.2    | 2.2    |
| 230367_at    | <i>SMTNL1</i>    | 2.66   | 2.45   | 2.47   |
| 216172_at    | <i>NA</i>        | 2.935  | 2.705  | 2.725  |
| 209901_x_at  | <i>AIF1</i>      | 2.735  | 2.535  | 2.535  |
| 219199_at    | <i>AFF4</i>      | 3.67   | 3.39   | 3.39   |
| 233805_at    | <i>NA</i>        | 2.955  | 2.735  | 2.735  |
| 219569_s_at  | <i>TMEM22</i>    | 9.83   | 9.09   | 9.09   |
| 1555397_at   | <i>MYO1D</i>     | 2.71   | 2.52   | 2.5    |
| 210518_at    | <i>CDH8</i>      | 3.38   | 3.13   | 3.11   |

|              |                  |        |        |        |
|--------------|------------------|--------|--------|--------|
| 1560733_at   | <i>ALG5</i>      | 2.495  | 2.315  | 2.305  |
| 200705_s_at  | <i>EEF1B2</i>    | 13.71  | 12.73  | 12.61  |
| 1569961_at   | <i>NA</i>        | 2.545  | 2.345  | 2.345  |
| 200992_at    | <i>IPO7</i>      | 13.75  | 12.7   | 12.72  |
| 1554604_at   | <i>MBTPS2</i>    | 3.055  | 2.825  | 2.815  |
| 231245_s_at  | <i>ADARB1</i>    | 2.455  | 2.275  | 2.265  |
| 207875_at    | <i>NA</i>        | 3.025  | 2.805  | 2.795  |
| 236636_at    | <i>NLGN1</i>     | 3.14   | 2.91   | 2.89   |
| 236588_at    | <i>CFDP1</i>     | 3.045  | 2.815  | 2.805  |
| 216544_at    | <i>RBMY2FP</i>   | 2.42   | 2.24   | 2.24   |
| 239831_at    | <i>TMEM106C</i>  | 2.72   | 2.52   | 2.52   |
| 234552_at    | <i>NA</i>        | 2.475  | 2.295  | 2.295  |
| 203316_s_at  | <i>SNRPE</i>     | 12.545 | 11.605 | 11.605 |
| 227779_at    | <i>ECSM2</i>     | 2.595  | 2.395  | 2.405  |
| 200673_at    | <i>LAPTM4A</i>   | 14.455 | 13.365 | 13.355 |
| 1559384_at   | <i>NA</i>        | 2.94   | 2.72   | 2.71   |
| 233910_at    | <i>TMEFF2</i>    | 3.11   | 2.88   | 2.87   |
| 1562462_at   | <i>DNAH10</i>    | 2.46   | 2.28   | 2.27   |
| 220581_at    | <i>C6orf97</i>   | 4.22   | 3.89   | 3.91   |
| 200073_s_at  | <i>HNRPD</i>     | 13.49  | 12.43  | 12.51  |
| 1552691_at   | <i>ARL11</i>     | 2.875  | 2.665  | 2.655  |
| 38290_at     | <i>RGS14</i>     | 3.23   | 2.99   | 2.99   |
| 213078_x_at  | <i>AGPAT7</i>    | 2.355  | 2.175  | 2.175  |
| 210372_s_at  | <i>TPD52L1</i>   | 2.4    | 2.23   | 2.21   |
| 221776_s_at  | <i>BRD7</i>      | 7.4    | 6.87   | 6.81   |
| 1558899_s_at | <i>FLJ35946</i>  | 2.785  | 2.595  | 2.565  |
| 1556344_at   | <i>LOC150051</i> | 2.21   | 2.04   | 2.05   |
| 215872_at    | <i>C14orf56</i>  | 2.265  | 2.085  | 2.095  |
| 240750_at    | <i>C7orf44</i>   | 2.97   | 2.76   | 2.74   |
| 232613_at    | <i>PBI</i>       | 2.94   | 2.72   | 2.72   |
| 1559437_at   | <i>PRKRIP1</i>   | 3.315  | 3.085  | 3.055  |

|              |                  |        |        |        |
|--------------|------------------|--------|--------|--------|
| 223717_s_at  | <i>ACRBP</i>     | 2.485  | 2.305  | 2.305  |
| 235329_at    | <i>NOXO1</i>     | 2.48   | 2.3    | 2.3    |
| 234501_x_at  | <i>PHTF1</i>     | 3.295  | 3.055  | 3.045  |
| 201973_s_at  | <i>C7orf28B</i>  | 12.905 | 11.885 | 11.975 |
| 243925_at    | <i>NA</i>        | 2.825  | 2.615  | 2.605  |
| 236780_at    | <i>NA</i>        | 2.68   | 2.48   | 2.48   |
| 234792_x_at  | <i>IGHV2-70</i>  | 2.465  | 2.285  | 2.285  |
| 238150_at    | <i>FLJ27365</i>  | 2.64   | 2.45   | 2.43   |
| 235319_at    | <i>NA</i>        | 2.495  | 2.315  | 2.315  |
| 230957_at    | <i>NA</i>        | 2.7    | 2.51   | 2.49   |
| 205817_at    | <i>SIX1</i>      | 2.555  | 2.365  | 2.355  |
| 1556999_at   | <i>LOC285045</i> | 2.545  | 2.355  | 2.345  |
| 1552504_a_at | <i>BRSK1</i>     | 2.99   | 2.77   | 2.76   |
| 1561320_at   | <i>PAK6</i>      | 2.71   | 2.51   | 2.51   |
| 1561459_at   | <i>NA</i>        | 2.44   | 2.26   | 2.26   |
| 206187_at    | <i>PTGIR</i>     | 2.32   | 2.14   | 2.15   |
| 240553_at    | <i>TESC</i>      | 2.49   | 2.31   | 2.3    |
| 1557305_at   | <i>TACCI</i>     | 2.875  | 2.665  | 2.645  |
| 1565073_at   | <i>NA</i>        | 2.72   | 2.53   | 2.51   |
| 231479_at    | <i>TTC33</i>     | 2.935  | 2.715  | 2.715  |
| 207533_at    | <i>CCL1</i>      | 2.615  | 2.415  | 2.415  |
| 244730_x_at  | <i>ZSCAN16</i>   | 4.625  | 4.275  | 4.295  |
| 240673_at    | <i>NA</i>        | 3.26   | 3.03   | 3.01   |
| 228610_at    | <i>TM9SF3</i>    | 2.6    | 2.4    | 2.4    |
| 211333_s_at  | <i>FASLG</i>     | 2.43   | 2.25   | 2.25   |
| 229628_s_at  | <i>KIAA1529</i>  | 2.69   | 2.49   | 2.48   |
| 225100_at    | <i>FBXO45</i>    | 7.905  | 7.305  | 7.315  |
| 234990_at    | <i>NA</i>        | 2.67   | 2.47   | 2.47   |
| 1569543_at   | <i>RSU1</i>      | 3.74   | 3.45   | 3.47   |
| 223026_s_at  | <i>VPS29</i>     | 10.885 | 10.075 | 10.065 |
| 236967_at    | <i>LOC645249</i> | 2.335  | 2.155  | 2.155  |

|              |                  |        |        |        |
|--------------|------------------|--------|--------|--------|
| 233618_at    | <i>NA</i>        | 2.39   | 2.21   | 2.21   |
| 1568762_at   | <i>PDCD6</i>     | 3.125  | 2.885  | 2.885  |
| 240472_at    | <i>NA</i>        | 3.795  | 3.495  | 3.525  |
| 1553466_at   | <i>CXorf59</i>   | 2.12   | 1.96   | 1.96   |
| 240774_at    | <i>NA</i>        | 3.23   | 3      | 2.98   |
| 228134_at    | <i>NDE1</i>      | 2.13   | 1.97   | 1.97   |
| 207408_at    | <i>SLC22A14</i>  | 2.61   | 2.42   | 2.4    |
| 207319_s at  | <i>CDC2L5</i>    | 3.095  | 2.865  | 2.855  |
| 220729_at    | <i>NA</i>        | 2.86   | 2.65   | 2.64   |
| 230907_at    | <i>GPRC5C</i>    | 2.46   | 2.28   | 2.28   |
| 212929_s at  | <i>FAM21C</i>    | 11.215 | 10.395 | 10.355 |
| 242763_at    | <i>PKHD1L1</i>   | 3.15   | 2.92   | 2.91   |
| 218916_at    | <i>ZNF768</i>    | 6.275  | 5.785  | 5.835  |
| 232970_at    | <i>FAM86D</i>    | 2.525  | 2.345  | 2.345  |
| 210827_s at  | <i>ELF3</i>      | 3.065  | 2.845  | 2.835  |
| 226947_at    | <i>GUSBL2</i>    | 5.435  | 5.015  | 5.045  |
| 224437_s at  | <i>C6orf55</i>   | 11.46  | 10.62  | 10.59  |
| 208204_s at  | <i>CAV3</i>      | 2.805  | 2.605  | 2.595  |
| 221758_at    | <i>ARMC6</i>     | 6.45   | 5.97   | 5.97   |
| 234918_at    | <i>GLTSCR2</i>   | 5.64   | 5.22   | 5.22   |
| 201980_s at  | <i>RSU1</i>      | 12.71  | 11.73  | 11.81  |
| 1559289_at   | <i>TADAIL</i>    | 2.805  | 2.605  | 2.595  |
| 218685_s at  | <i>SMUG1</i>     | 2.495  | 2.315  | 2.305  |
| 1554148_a at | <i>SLC33A1</i>   | 5.63   | 5.22   | 5.2    |
| 1559003_a at | <i>LOC126661</i> | 3.3    | 3.05   | 3.06   |
| 243153_at    | <i>CDK5RAP2</i>  | 2.77   | 2.56   | 2.57   |
| 235517_at    | <i>KCNIP4</i>    | 3.55   | 3.3    | 3.28   |
| 206181_at    | <i>SLAMF1</i>    | 2.15   | 1.99   | 1.99   |
| 240684_at    | <i>SIPA1L3</i>   | 2.89   | 2.68   | 2.67   |
| 216356_x at  | <i>BAIAP3</i>    | 3.675  | 3.395  | 3.395  |
| 204655_at    | <i>CCL5</i>      | 2.285  | 2.115  | 2.125  |

|              |                  |        |        |        |
|--------------|------------------|--------|--------|--------|
| 219348_at    | <i>MDS032</i>    | 6.105  | 5.625  | 5.675  |
| 239687_at    | <i>BTBD12</i>    | 2.65   | 2.46   | 2.44   |
| 234056_at    | <i>NA</i>        | 2.39   | 2.21   | 2.21   |
| 1562566_at   | <i>LOC643749</i> | 2.905  | 2.695  | 2.675  |
| 211751_at    | <i>PDE4DIP</i>   | 2.765  | 2.565  | 2.555  |
| 232037_at    | <i>PUNC</i>      | 2.785  | 2.585  | 2.575  |
| 208468_at    | <i>SOX21</i>     | 2.325  | 2.155  | 2.145  |
| 205311_at    | <i>DDC</i>       | 2.41   | 2.24   | 2.22   |
| 216057_at    | <i>RAB3GAP2</i>  | 3.145  | 2.925  | 2.895  |
| 204499_at    | <i>AGTPBP1</i>   | 2.66   | 2.46   | 2.46   |
| 211786_at    | <i>TNFRSF9</i>   | 2.875  | 2.655  | 2.655  |
| 1557741_at   | <i>UST</i>       | 3.15   | 2.93   | 2.9    |
| 1556204_a_at | <i>LOC730051</i> | 2.78   | 2.58   | 2.58   |
| 215951_at    | <i>TBC1D2B</i>   | 2.285  | 2.125  | 2.115  |
| 236181_at    | <i>LOC389831</i> | 3.345  | 3.095  | 3.105  |
| 219788_at    | <i>PILRA</i>     | 3.175  | 2.945  | 2.935  |
| 207657_x_at  | <i>TNPO1</i>     | 11.81  | 10.91  | 10.96  |
| 200089_s_at  | <i>RPL4</i>      | 13.425 | 12.405 | 12.455 |
| 1569737_a_at | <i>CASKIN1</i>   | 2.45   | 2.27   | 2.27   |
| 226057_at    | <i>CDGAP</i>     | 2.885  | 2.675  | 2.655  |
| 1557571_at   | <i>VPS13D</i>    | 2.825  | 2.625  | 2.615  |
| 1555412_at   | <i>FBXL21</i>    | 3.22   | 2.98   | 2.98   |
| 206553_at    | <i>OAS2</i>      | 2.605  | 2.415  | 2.405  |
| 228052_x_at  | <i>TCF3</i>      | 2.32   | 2.14   | 2.14   |
| 214537_at    | <i>HIST1H1D</i>  | 2.47   | 2.3    | 2.28   |
| 1554885_a_at | <i>PRIM2A</i>    | 2.805  | 2.595  | 2.605  |
| 217175_at    | <i>UGT2B15</i>   | 2.625  | 2.435  | 2.425  |
| 231122_x_at  | <i>ZDHHC19</i>   | 2.94   | 2.71   | 2.73   |
| 1566456_at   | <i>LOC729988</i> | 2.52   | 2.34   | 2.34   |
| 232100_at    | <i>IBRDC1</i>    | 2.99   | 2.76   | 2.78   |
| 212976_at    | <i>NA</i>        | 2.885  | 2.675  | 2.665  |

|              |                  |       |       |       |
|--------------|------------------|-------|-------|-------|
| 209005_at    | <i>FBXL5</i>     | 8.705 | 8.035 | 8.095 |
| 201097_s_at  | <i>ARF4</i>      | 14.91 | 13.81 | 13.81 |
| 239816_at    | <i>POLD3</i>     | 4.94  | 4.6   | 4.56  |
| 243885_x_at  | <i>GFMI</i>      | 3.625 | 3.375 | 3.345 |
| 1553181_at   | <i>DDX31</i>     | 2.26  | 2.1   | 2.1   |
| 231223_at    | <i>CSMD1</i>     | 2.885 | 2.665 | 2.665 |
| 216630_at    | <i>SEC14L1</i>   | 2.705 | 2.505 | 2.505 |
| 230837_at    | <i>LOC647500</i> | 3.04  | 2.83  | 2.81  |
| 234497_s_at  | <i>NA</i>        | 2.775 | 2.575 | 2.565 |
| 216113_at    | <i>ABI2</i>      | 2.7   | 2.5   | 2.5   |
| 1559522_at   | <i>NA</i>        | 2.8   | 2.6   | 2.6   |
| 243158_at    | <i>NT5C2</i>     | 2.41  | 2.23  | 2.24  |
| 204888_s_at  | <i>NEURL</i>     | 2.11  | 1.95  | 1.95  |
| 231281_at    | <i>TBC1D5</i>    | 2.73  | 2.52  | 2.54  |
| 1561652_at   | <i>BECN1</i>     | 3.125 | 2.905 | 2.895 |
| 1555746_at   | <i>CD79B</i>     | 3.165 | 2.935 | 2.925 |
| 211551_at    | <i>EGFR</i>      | 2.515 | 2.335 | 2.335 |
| 223137_at    | <i>ZDHHC4</i>    | 2.645 | 2.445 | 2.445 |
| 223781_x_at  | <i>ADH4</i>      | 6.595 | 6.095 | 6.125 |
| 209598_at    | <i>PNMA2</i>     | 2.44  | 2.26  | 2.26  |
| 214279_s_at  | <i>NDRG2</i>     | 2.275 | 2.115 | 2.105 |
| 216785_at    | <i>FKBP1B</i>    | 2.555 | 2.375 | 2.375 |
| 239609_s_at  | <i>AGPAT7</i>    | 2.63  | 2.44  | 2.43  |
| 229902_at    | <i>FLT4</i>      | 2.515 | 2.335 | 2.335 |
| 220901_at    | <i>GPR157</i>    | 2.41  | 2.22  | 2.24  |
| 1556771_a_at | <i>BC038740</i>  | 2.855 | 2.645 | 2.655 |
| 203506_s_at  | <i>MED12</i>     | 2.515 | 2.325 | 2.335 |
| 231612_at    | <i>C4orf35</i>   | 2.535 | 2.355 | 2.345 |
| 230950_at    | <i>NA</i>        | 2.645 | 2.455 | 2.445 |
| 244757_at    | <i>CYP2R1</i>    | 3.295 | 3.065 | 3.045 |
| 244460_at    | <i>PMP22CD</i>   | 2.465 | 2.295 | 2.275 |



|              |                  |        |       |       |
|--------------|------------------|--------|-------|-------|
| 231395_at    | <i>NA</i>        | 2.28   | 2.12  | 2.12  |
| 1561587_at   | <i>LOC284260</i> | 2.5    | 2.33  | 2.31  |
| 239319_at    | <i>LOC728342</i> | 2.475  | 2.295 | 2.295 |
| 223775_at    | <i>HHIP</i>      | 2.7    | 2.51  | 2.5   |
| 1553778_at   | <i>WBSCR27</i>   | 2.575  | 2.395 | 2.385 |
| 1556334_s_at | <i>DSCI</i>      | 2.77   | 2.57  | 2.56  |
| 231671_at    | <i>FGA</i>       | 2.335  | 2.165 | 2.155 |
| 1559110_at   | <i>NA</i>        | 2.345  | 2.175 | 2.165 |
| 241102_at    | <i>PBX1</i>      | 2.72   | 2.52  | 2.52  |
| 232822_x_at  | <i>MGC16121</i>  | 2.885  | 2.675 | 2.665 |
| 240897_at    | <i>NA</i>        | 2.4    | 2.23  | 2.22  |
| 241438_at    | <i>RLF</i>       | 2.505  | 2.325 | 2.325 |
| 212132_at    | <i>LSM14A</i>    | 12.62  | 11.65 | 11.75 |
| 206559_x_at  | <i>EEF1A1</i>    | 15.56  | 14.49 | 14.36 |
| 216769_x_at  | <i>C9orf150</i>  | 3.345  | 3.105 | 3.105 |
| 228010_at    | <i>PPP2R2C</i>   | 2.79   | 2.58  | 2.6   |
| 238641_at    | <i>FLJ43806</i>  | 2.945  | 2.715 | 2.735 |
| 239599_at    | <i>NA</i>        | 2.595  | 2.415 | 2.405 |
| 242541_at    | <i>ABCA9</i>     | 2.645  | 2.455 | 2.445 |
| 207596_at    | <i>NA</i>        | 2.545  | 2.365 | 2.365 |
| 231614_at    | <i>NOVA1</i>     | 2.99   | 2.78  | 2.76  |
| 211607_x_at  | <i>EGFR</i>      | 2.625  | 2.435 | 2.425 |
| 204122_at    | <i>TYROBP</i>    | 2.69   | 2.5   | 2.49  |
| 210576_at    | <i>CYP4F8</i>    | 2.8    | 2.6   | 2.59  |
| 239884_at    | <i>CADPS</i>     | 2.645  | 2.455 | 2.445 |
| 211878_at    | <i>CPVL</i>      | 2.83   | 2.63  | 2.62  |
| 212734_x_at  | <i>RPL13</i>     | 12.13  | 11.23 | 11.27 |
| 210808_s_at  | <i>NOX1</i>      | 3.745  | 3.465 | 3.475 |
| 205655_at    | <i>MDM4</i>      | 3.22   | 2.99  | 2.97  |
| 212213_x_at  | <i>OPAI</i>      | 10.425 | 9.705 | 9.625 |
| 219138_at    | <i>RPL14</i>     | 8.905  | 8.275 | 8.255 |

|              |                 |        |        |        |
|--------------|-----------------|--------|--------|--------|
| 243679_at    | <i>JPH3</i>     | 3.445  | 3.185  | 3.215  |
| 238499_at    | <i>SLC45A3</i>  | 2.19   | 2.03   | 2.03   |
| 1561121_at   | <i>IFT88</i>    | 3.07   | 2.86   | 2.84   |
| 231023_at    | <i>ING1</i>     | 2.725  | 2.525  | 2.525  |
| 241162_at    | <i>FARP1</i>    | 2.895  | 2.685  | 2.695  |
| 1559890_a_at | <i>ABII</i>     | 3.54   | 3.28   | 3.28   |
| 206795_at    | <i>F2RL2</i>    | 3.53   | 3.29   | 3.26   |
| 224597_at    | <i>NA</i>       | 12.47  | 11.53  | 11.61  |
| 215663_at    | <i>MBNL1</i>    | 3.015  | 2.805  | 2.785  |
| 206253_at    | <i>DLG2</i>     | 3.04   | 2.82   | 2.82   |
| 242780_at    | <i>VAPA</i>     | 3.94   | 3.64   | 3.67   |
| 1566323_at   | <i>MAF</i>      | 2.98   | 2.76   | 2.76   |
| 220221_at    | <i>VPS13D</i>   | 2.565  | 2.385  | 2.385  |
| 229337_at    | <i>USP2</i>     | 2.76   | 2.56   | 2.56   |
| 1569785_at   | <i>NA</i>       | 3.165  | 2.935  | 2.955  |
| 217593_at    | <i>ZSCAN18</i>  | 3.41   | 3.16   | 3.17   |
| 201130_s_at  | <i>CDH1</i>     | 2.41   | 2.24   | 2.23   |
| 218952_at    | <i>PCSKIN</i>   | 2.365  | 2.185  | 2.195  |
| 227995_at    | <i>NA</i>       | 2.23   | 2.07   | 2.07   |
| 212430_at    | <i>RBM38</i>    | 4.505  | 4.185  | 4.175  |
| 238071_at    | <i>LCN10</i>    | 2.945  | 2.725  | 2.725  |
| 234227_at    | <i>FLJ13611</i> | 3.05   | 2.84   | 2.83   |
| 217592_at    | <i>ZSWIM1</i>   | 2.485  | 2.305  | 2.305  |
| 224644_at    | <i>NA</i>       | 11.755 | 10.915 | 10.905 |
| 240447_at    | <i>NA</i>       | 3.095  | 2.885  | 2.865  |
| 205331_s_at  | <i>REEP2</i>    | 4.945  | 4.595  | 4.575  |
| 242649_x_at  | <i>C15orf21</i> | 2.835  | 2.645  | 2.625  |
| 237344_at    | <i>FLJ45743</i> | 2.385  | 2.215  | 2.205  |
| 234946_at    | <i>NA</i>       | 3.245  | 3.015  | 3.005  |
| 219776_s_at  | <i>NA</i>       | 2.37   | 2.2    | 2.19   |
| 217640_x_at  | <i>C18orf24</i> | 2.645  | 2.455  | 2.445  |

|              |                 |        |       |        |
|--------------|-----------------|--------|-------|--------|
| 208636_at    | <i>ACTNI</i>    | 13.11  | 12.14 | 12.2   |
| 211095_at    | <i>NFI</i>      | 3.175  | 2.965 | 2.945  |
| 243653_at    | <i>SHROOM3</i>  | 2.325  | 2.165 | 2.165  |
| 213780_at    | <i>TCHH</i>     | 2.63   | 2.45  | 2.44   |
| 1552388_at   | <i>FLJ30901</i> | 2.285  | 2.125 | 2.125  |
| 238204_at    | <i>LMOD1</i>    | 2.81   | 2.6   | 2.61   |
| 219932_at    | <i>SLC27A6</i>  | 2.42   | 2.24  | 2.24   |
| 1563488_at   | <i>TMEM132B</i> | 2.57   | 2.39  | 2.38   |
| 223617_x_at  | <i>ATAD3B</i>   | 5.08   | 4.71  | 4.73   |
| 242697_at    | <i>ZNF540</i>   | 2.475  | 2.295 | 2.295  |
| 206699_x_at  | <i>NPASI</i>    | 3.65   | 3.39  | 3.38   |
| 217740_x_at  | <i>RPL7A</i>    | 13.67  | 12.69 | 12.69  |
| 1563519_at   | <i>TSC22D2</i>  | 3.505  | 3.255 | 3.245  |
| 205375_at    | <i>MDFI</i>     | 3.36   | 3.12  | 3.12   |
| 234707_x_at  | <i>IGLV1-44</i> | 2.975  | 2.755 | 2.765  |
| 238300_s_at  | <i>DAZAP2</i>   | 2.69   | 2.5   | 2.49   |
| 213677_s_at  | <i>PMSI</i>     | 8.94   | 8.27  | 8.33   |
| 227287_at    | <i>CITED2</i>   | 2.595  | 2.415 | 2.405  |
| 244156_at    | <i>AGBL1</i>    | 3.01   | 2.8   | 2.78   |
| 217479_at    | <i>FLJ45455</i> | 3.265  | 3.035 | 3.025  |
| 1565581_at   | <i>NA</i>       | 2.31   | 2.15  | 2.15   |
| 226910_at    | <i>NA</i>       | 10.535 | 9.765 | 9.785  |
| 1553830_s_at | <i>MAGEA2</i>   | 2.465  | 2.285 | 2.295  |
| 201225_s_at  | <i>SRRM1</i>    | 10.765 | 9.965 | 10.035 |
| 234138_at    | <i>DABI</i>     | 3.09   | 2.88  | 2.86   |
| 233310_at    | <i>NA</i>       | 2.575  | 2.395 | 2.395  |
| 214385_s_at  | <i>MUC5AC</i>   | 2.655  | 2.475 | 2.465  |
| 219921_s_at  | <i>DOCK5</i>    | 2.79   | 2.59  | 2.59   |
| 237505_at    | <i>ACAA2</i>    | 2.615  | 2.435 | 2.425  |
| 234012_at    | <i>IGSF2I</i>   | 3.475  | 3.235 | 3.225  |
| 202885_s_at  | <i>PPP2R1B</i>  | 2.395  | 2.215 | 2.225  |

|              |                      |       |       |       |
|--------------|----------------------|-------|-------|-------|
| 1561984_at   | <i>NA</i>            | 2.42  | 2.24  | 2.24  |
| 238352_s_at  | <i>CAPZB</i>         | 2.6   | 2.42  | 2.42  |
| 208386_x_at  | <i>DMC1</i>          | 4.635 | 4.305 | 4.295 |
| 210885_s_at  | <i>TRIM15</i>        | 2.46  | 2.29  | 2.28  |
| 207851_s_at  | <i>INSR</i>          | 3.215 | 2.995 | 2.985 |
| 238344_at    | <i>COPG2</i>         | 3.495 | 3.255 | 3.245 |
| 1558185_at   | <i>CLLU1</i>         | 2.635 | 2.455 | 2.445 |
| 235312_s_at  | <i>NRAP</i>          | 3.055 | 2.845 | 2.825 |
| 227011_at    | <i>ZNF672</i>        | 2.5   | 2.32  | 2.32  |
| 240832_at    | <i>NA</i>            | 2.61  | 2.42  | 2.43  |
| 1552412_a_at | <i>DEFB106A</i>      | 2.77  | 2.58  | 2.56  |
| 230507_at    | <i>ATXN1</i>         | 3.01  | 2.8   | 2.78  |
| 1556909_at   | <i>NA</i>            | 2.505 | 2.325 | 2.325 |
| 234614_at    | <i>NA</i>            | 2.405 | 2.235 | 2.225 |
| 228566_at    | <i>P15RS</i>         | 2.23  | 2.07  | 2.07  |
| 240492_at    | <i>DKFZp686O1327</i> | 2.935 | 2.725 | 2.735 |
| 236953_s_at  | <i>RP11-50D16.3</i>  | 3.305 | 3.075 | 3.055 |
| 229918_at    | <i>CCDC40</i>        | 2.695 | 2.495 | 2.505 |
| 1563858_at   | <i>NA</i>            | 2.895 | 2.695 | 2.685 |
| 232365_at    | <i>SIAH1</i>         | 2.895 | 2.695 | 2.685 |
| 1558691_a_at | <i>DOCK4</i>         | 2.83  | 2.63  | 2.63  |
| 234530_s_at  | <i>C6orf12</i>       | 3.005 | 2.795 | 2.785 |
| 216318_at    | <i>IGHA1</i>         | 3.265 | 3.035 | 3.025 |
| 1554145_a_at | <i>CCDC128</i>       | 2.415 | 2.245 | 2.235 |
| 235047_x_at  | <i>BTBD14B</i>       | 5.715 | 5.315 | 5.305 |
| 225356_at    | <i>TBX19</i>         | 11.54 | 10.75 | 10.69 |
| 1558410_s_at | <i>IMMP2L</i>        | 3.005 | 2.795 | 2.785 |
| 238650_x_at  | <i>WDR89</i>         | 4.825 | 4.495 | 4.475 |
| 237825_x_at  | <i>LOC647065</i>     | 3.535 | 3.275 | 3.285 |
| 1561105_at   | <i>NA</i>            | 3.025 | 2.815 | 2.795 |
| 238839_at    | <i>OTX1</i>          | 2.3   | 2.14  | 2.14  |

|              |                  |       |       |       |
|--------------|------------------|-------|-------|-------|
| 200634_at    | <i>PFNI</i>      | 6.82  | 6.35  | 6.33  |
| 232207_at    | <i>LOC285749</i> | 2.78  | 2.57  | 2.59  |
| 213779_at    | <i>EMIDI</i>     | 5.41  | 5.03  | 5.02  |
| 232831_at    | <i>LRFN5</i>     | 2.645 | 2.465 | 2.455 |
| 242393_x_at  | <i>PARG</i>      | 2.63  | 2.45  | 2.44  |
| 1566865_at   | <i>C7orf38</i>   | 2.86  | 2.67  | 2.65  |
| 244400_at    | <i>VPS33A</i>    | 3.265 | 3.025 | 3.035 |
| 243905_at    | <i>LOC387895</i> | 2.57  | 2.39  | 2.38  |
| 1554259_at   | <i>GPSM1</i>     | 2.04  | 1.89  | 1.9   |
| 1552390_a_at | <i>C8orf47</i>   | 2.965 | 2.755 | 2.765 |
| 1570255_s_at | <i>LOC375010</i> | 2.965 | 2.765 | 2.755 |
| 1560910_at   | <i>PPIL6</i>     | 2.77  | 2.58  | 2.57  |
| 242291_at    | <i>EIF4ENIF1</i> | 2.605 | 2.425 | 2.425 |
| AFFX-hum_at  | <i>NA</i>        | 16.15 | 15.08 | 14.94 |
| 219305_x_at  | <i>FBXO2</i>     | 3.505 | 3.275 | 3.245 |
| 205834_s_at  | <i>PART1</i>     | 2.62  | 2.44  | 2.43  |
| 237242_at    | <i>LOC126536</i> | 2.56  | 2.38  | 2.38  |
| 240356_s_at  | <i>NA</i>        | 2.905 | 2.705 | 2.695 |
| 1556435_at   | <i>LOC400622</i> | 2.615 | 2.435 | 2.435 |
| 241973_x_at  | <i>DPP7</i>      | 2.59  | 2.41  | 2.41  |
| 209097_s_at  | <i>JAG1</i>      | 3.585 | 3.335 | 3.325 |
| 1562914_a_at | <i>FLJ25328</i>  | 2.115 | 1.965 | 1.975 |
| 214122_at    | <i>PDLIM7</i>    | 2.705 | 2.515 | 2.505 |
| 1566643_a_at | <i>GNG7</i>      | 2.82  | 2.62  | 2.62  |
| 217348_x_at  | <i>ARHGEF15</i>  | 2.88  | 2.67  | 2.69  |
| 1561906_at   | <i>ASIP</i>      | 3.115 | 2.905 | 2.885 |
| 1566690_at   | <i>NA</i>        | 2.185 | 2.025 | 2.025 |
| 242619_x_at  | <i>SLC36A1</i>   | 2.655 | 2.475 | 2.465 |
| 236130_at    | <i>MBD2</i>      | 2.425 | 2.245 | 2.255 |
| 211624_s_at  | <i>DRD2</i>      | 2.745 | 2.545 | 2.555 |
| 229550_at    | <i>KIAA1409</i>  | 2.29  | 2.13  | 2.13  |

|              |                  |        |        |        |
|--------------|------------------|--------|--------|--------|
| 205712_at    | <i>PTPRD</i>     | 2.46   | 2.28   | 2.28   |
| 1557945_at   | <i>TCTE3</i>     | 2.965  | 2.765  | 2.755  |
| 1563608_a_at | <i>KCNT1</i>     | 2.205  | 2.045  | 2.045  |
| 236093_at    | <i>ZNF544</i>    | 4.32   | 4.02   | 4.02   |
| 1562981_at   | <i>HBB</i>       | 2.355  | 2.205  | 2.185  |
| 205755_at    | <i>ITIH3</i>     | 2.3    | 2.14   | 2.14   |
| 1557609_s_at | <i>TBC1D12</i>   | 3.345  | 3.125  | 3.095  |
| 1559350_at   | <i>NA</i>        | 2.685  | 2.505  | 2.495  |
| 218893_at    | <i>ISOC2</i>     | 3.795  | 3.535  | 3.525  |
| 229934_at    | <i>NA</i>        | 2.445  | 2.275  | 2.265  |
| AFFX-HUMR    | <i>NA</i>        | 11.285 | 10.465 | 10.505 |
| 225265_at    | <i>C2orf12</i>   | 13.09  | 12.13  | 12.22  |
| 234692_at    | <i>BAI3</i>      | 2.765  | 2.565  | 2.565  |
| 1559849_at   | <i>ZNF605</i>    | 3.365  | 3.135  | 3.115  |
| 238415_at    | <i>UBE4B</i>     | 2.94   | 2.74   | 2.74   |
| 229234_at    | <i>ZC3H12B</i>   | 2.935  | 2.735  | 2.735  |
| 223013_at    | <i>TBL1XR1</i>   | 11.505 | 10.715 | 10.695 |
| 212195_at    | <i>IL6ST</i>     | 14.365 | 13.325 | 13.405 |
| 228300_at    | <i>CCDC103</i>   | 2.445  | 2.265  | 2.265  |
| 230593_at    | <i>NA</i>        | 3.12   | 2.9    | 2.9    |
| 211604_x_at  | <i>HAPI</i>      | 2.6    | 2.42   | 2.42   |
| 223863_at    | <i>LOC114227</i> | 2.82   | 2.63   | 2.62   |
| 233119_at    | <i>FLJ14213</i>  | 2.205  | 2.045  | 2.045  |
| 216808_at    | <i>LOC391703</i> | 2.685  | 2.505  | 2.495  |
| 1561857_at   | <i>TMEM110</i>   | 3.025  | 2.815  | 2.805  |
| 1556759_at   | <i>NA</i>        | 2.94   | 2.75   | 2.73   |
| 210823_s_at  | <i>PTPRS</i>     | 2.33   | 2.17   | 2.17   |
| 244728_at    | <i>NA</i>        | 2.74   | 2.55   | 2.54   |
| 220906_at    | <i>NA</i>        | 3.15   | 2.94   | 2.92   |
| 211461_at    | <i>CSPG4LYP1</i> | 2.65   | 2.47   | 2.47   |
| 211970_x_at  | <i>ACTG1</i>     | 14.745 | 13.705 | 13.735 |

|              |                  |        |        |        |
|--------------|------------------|--------|--------|--------|
| 224984_at    | <i>NFAT5</i>     | 11.565 | 10.775 | 10.755 |
| 208718_at    | <i>DDX17</i>     | 14.535 | 13.505 | 13.535 |
| 1567219_at   | <i>NA</i>        | 8.515  | 7.945  | 7.885  |
| 217858_s_at  | <i>ARMCX3</i>    | 12.805 | 11.925 | 11.885 |
| 216482_x_at  | <i>ZNF79</i>     | 2.26   | 2.1    | 2.1    |
| 229217_at    | <i>SP3</i>       | 2.755  | 2.565  | 2.555  |
| 221982_x_at  | <i>LAGE3</i>     | 5.11   | 4.77   | 4.73   |
| 232518_at    | <i>PRIC285</i>   | 2.57   | 2.39   | 2.39   |
| 1566271_x_at | <i>GARNL1</i>    | 3.045  | 2.835  | 2.825  |
| 236438_at    | <i>RABGEF1</i>   | 2.565  | 2.385  | 2.385  |
| 219322_s_at  | <i>WDR8</i>      | 6.795  | 6.345  | 6.295  |
| 210643_at    | <i>TNFSF11</i>   | 2.87   | 2.68   | 2.66   |
| 221699_s_at  | <i>DDX50</i>     | 10.285 | 9.545  | 9.595  |
| 210583_at    | <i>POLDIP3</i>   | 2.63   | 2.45   | 2.45   |
| 207008_at    | <i>IL8RB</i>     | 3.245  | 3.025  | 3.015  |
| 211174_s_at  | <i>CCKAR</i>     | 2.455  | 2.285  | 2.275  |
| 229775_s_at  | <i>LOC730031</i> | 2.34   | 2.18   | 2.18   |
| 209793_at    | <i>GRIA1</i>     | 3.435  | 3.195  | 3.195  |
| 1565027_at   | <i>OFCC1</i>     | 4.02   | 3.75   | 3.73   |
| 214428_x_at  | <i>C4A</i>       | 5.065  | 4.715  | 4.705  |
| 238618_at    | <i>NF2</i>       | 2.725  | 2.545  | 2.535  |
| 244153_at    | <i>RHOT1</i>     | 3.85   | 3.59   | 3.58   |
| 244143_at    | <i>NA</i>        | 2.94   | 2.73   | 2.74   |
| 237696_at    | <i>NA</i>        | 3.22   | 3      | 3      |
| 218501_at    | <i>ARHGEF3</i>   | 8.05   | 7.49   | 7.49   |
| 229184_at    | <i>YSK4</i>      | 2.665  | 2.485  | 2.485  |
| 34260_at     | <i>TELO2</i>     | 5.675  | 5.285  | 5.265  |
| 218872_at    | <i>TESC</i>      | 2.355  | 2.195  | 2.195  |
| 234381_at    | <i>IGL@</i>      | 4      | 3.72   | 3.72   |
| 236136_at    | <i>PSCD3</i>     | 2.505  | 2.335  | 2.325  |
| 240833_at    | <i>NIPSNAP3A</i> | 2.505  | 2.325  | 2.325  |

|              |                  |        |        |        |
|--------------|------------------|--------|--------|--------|
| 213287_s_at  | <i>KRT10</i>     | 12.035 | 11.245 | 11.155 |
| 224803_s_at  | <i>LOC148413</i> | 2.675  | 2.485  | 2.495  |
| 217246_s_at  | <i>EPAG</i>      | 2.63   | 2.45   | 2.45   |
| 205864_at    | <i>SLC7A4</i>    | 2.155  | 2.005  | 2.015  |
| 1556873_at   | <i>RKHD2</i>     | 2.945  | 2.745  | 2.735  |
| 1555562_a_at | <i>ZCCHC7</i>    | 3.47   | 3.22   | 3.24   |
| 228897_at    | <i>DERL3</i>     | 2.62   | 2.44   | 2.44   |
| 240267_at    | <i>SYT6</i>      | 3.345  | 3.105  | 3.115  |
| 1559515_at   | <i>XPA</i>       | 3.345  | 3.105  | 3.115  |
| 211265_at    | <i>PTGER3</i>    | 2.83   | 2.64   | 2.63   |
| 1570046_at   | <i>SCRG1</i>     | 3.03   | 2.83   | 2.82   |
| 225889_at    | <i>AEBP2</i>     | 10.64  | 9.89   | 9.92   |
| 1558557_at   | <i>MGC16824</i>  | 3.06   | 2.85   | 2.84   |
| 1561202_at   | <i>NA</i>        | 3      | 2.8    | 2.79   |
| 241855_s_at  | <i>CUL3</i>      | 2.935  | 2.735  | 2.735  |
| 224174_at    | <i>TTY11</i>     | 2.49   | 2.32   | 2.31   |
| 230852_at    | <i>STAC3</i>     | 4.07   | 3.8    | 3.78   |
| 204694_at    | <i>AFP</i>       | 2.69   | 2.52   | 2.5    |
| 215276_at    | <i>WFDC8</i>     | 3.16   | 2.94   | 2.94   |
| 217594_at    | <i>ZCCHC11</i>   | 3.335  | 3.105  | 3.115  |
| 214443_at    | <i>PVR</i>       | 2.465  | 2.305  | 2.295  |
| 214655_at    | <i>GPR6</i>      | 2.565  | 2.385  | 2.385  |
| 232866_at    | <i>ZNF135</i>    | 2.455  | 2.295  | 2.285  |
| 225887_at    | <i>C13orf23</i>  | 7.095  | 6.615  | 6.615  |
| 1556813_at   | <i>ANKRD16</i>   | 2.525  | 2.345  | 2.355  |
| 208382_s_at  | <i>DMC1</i>      | 2.64   | 2.46   | 2.46   |
| 1561170_at   | <i>FLJ36131</i>  | 3.2    | 2.99   | 2.97   |
| 219995_s_at  | <i>ZNF750</i>    | 2.95   | 2.76   | 2.74   |
| 236550_s_at  | <i>ZNF311</i>    | 2.855  | 2.665  | 2.655  |
| 241014_at    | <i>FLG</i>       | 3.21   | 2.99   | 2.99   |
| 207991_x_at  | <i>ACRVI</i>     | 2.095  | 1.955  | 1.955  |



|              |                  |        |        |        |
|--------------|------------------|--------|--------|--------|
| 244263_at    | <i>HDAC7A</i>    | 2.195  | 2.055  | 2.055  |
| 1560790_at   | <i>FLJ36144</i>  | 2.83   | 2.64   | 2.63   |
| 208805_at    | <i>PSMA6</i>     | 12.485 | 11.645 | 11.615 |
| 233719_s_at  | <i>TASPI</i>     | 2.755  | 2.565  | 2.575  |
| 206646_at    | <i>GLII</i>      | 2.445  | 2.285  | 2.275  |
| 1560917_at   | <i>ACAD9</i>     | 2.98   | 2.78   | 2.77   |
| 212267_at    | <i>WAPAL</i>     | 10.115 | 9.435  | 9.425  |
| 202115_s_at  | <i>NOC2L</i>     | 6.79   | 6.35   | 6.31   |
| 220550_at    | <i>FBXO4</i>     | 2.94   | 2.74   | 2.73   |
| 238873_at    | <i>NPC1</i>      | 3.115  | 2.905  | 2.895  |
| 1554613_a_at | <i>KIAA0226</i>  | 3.325  | 3.105  | 3.095  |
| 210630_s_at  | <i>RAD52</i>     | 2.455  | 2.295  | 2.295  |
| 39817_s_at   | <i>C6orf108</i>  | 6.47   | 6.04   | 6.02   |
| 215406_at    | <i>TRIO</i>      | 2.46   | 2.3    | 2.3    |
| 1565832_at   | <i>ANKRD15</i>   | 2.905  | 2.695  | 2.715  |
| 1560856_at   | <i>NA</i>        | 2.93   | 2.73   | 2.73   |
| 201049_s_at  | <i>RPS18</i>     | 14.475 | 13.495 | 13.495 |
| 242085_at    | <i>C2orf18</i>   | 3.55   | 3.31   | 3.3    |
| 212705_x_at  | <i>TSPAN4</i>    | 3.46   | 3.22   | 3.23   |
| 233143_at    | <i>C20orf173</i> | 2.435  | 2.265  | 2.275  |
| 220585_at    | <i>HKDC1</i>     | 2.705  | 2.525  | 2.525  |
| 240696_at    | <i>NA</i>        | 2.62   | 2.45   | 2.43   |
| 215202_at    | <i>LOC91316</i>  | 2.295  | 2.135  | 2.135  |
| 232732_at    | <i>NA</i>        | 2.755  | 2.575  | 2.565  |
| 229104_s_at  | <i>GPR39</i>     | 2.86   | 2.67   | 2.66   |
| 200735_x_at  | <i>NACA</i>      | 11.885 | 11.105 | 11.055 |
| 217200_x_at  | <i>CYB561</i>    | 5.34   | 4.99   | 4.96   |
| 1568977_at   | <i>RNASET2</i>   | 2.335  | 2.175  | 2.175  |
| 204990_s_at  | <i>ITGB4</i>     | 3.665  | 3.425  | 3.425  |
| 237980_at    | <i>LOC338864</i> | 2.605  | 2.435  | 2.425  |
| 240332_at    | <i>NA</i>        | 2.845  | 2.655  | 2.645  |

|              |                  |        |        |        |
|--------------|------------------|--------|--------|--------|
| 215852_x_at  | <i>C20orf117</i> | 3.155  | 2.945  | 2.935  |
| 1557964_at   | <i>EIF4G2</i>    | 2.06   | 1.92   | 1.92   |
| 212010_s_at  | <i>CDV3</i>      | 14.415 | 13.485 | 13.395 |
| 52940_at     | <i>SIGIRR</i>    | 2.88   | 2.68   | 2.68   |
| 211050_x_at  | <i>LOC643313</i> | 2.3    | 2.14   | 2.14   |
| 217049_x_at  | <i>PCDH11Y</i>   | 2.995  | 2.795  | 2.795  |
| 1567081_x_at | <i>CLN6</i>      | 2.42   | 2.26   | 2.26   |
| 202455_at    | <i>HDAC5</i>     | 5.96   | 5.54   | 5.58   |
| 242519_at    | <i>SEPP1</i>     | 2.895  | 2.705  | 2.695  |
| 239759_at    | <i>NA</i>        | 2.39   | 2.23   | 2.23   |
| 1562830_at   | <i>METT5D1</i>   | 2.305  | 2.145  | 2.145  |
| 206236_at    | <i>GPR4</i>      | 3.01   | 2.81   | 2.81   |
| 226723_at    | <i>CCDC23</i>    | 6.54   | 6.11   | 6.09   |
| 206633_at    | <i>CHRNA1</i>    | 2.31   | 2.16   | 2.15   |
| 203713_s_at  | <i>LLGL2</i>     | 2.605  | 2.435  | 2.425  |
| 209533_s_at  | <i>PLAA</i>      | 7.905  | 7.365  | 7.375  |
| 1557206_at   | <i>FLJ35848</i>  | 3.175  | 2.965  | 2.945  |
| 225159_s_at  | <i>ELK4</i>      | 11.535 | 10.715 | 10.795 |
| 207436_x_at  | <i>KIAA0894</i>  | 4.655  | 4.335  | 4.335  |
| 224108_at    | <i>NA</i>        | 2.315  | 2.155  | 2.155  |
| 237132_at    | <i>TJP2</i>      | 2.245  | 2.085  | 2.085  |
| 219424_at    | <i>EBI3</i>      | 2.545  | 2.375  | 2.365  |
| 1565795_at   | <i>DUOX1</i>     | 2.34   | 2.18   | 2.18   |
| 205591_at    | <i>OLFM1</i>     | 2.885  | 2.685  | 2.685  |
| 221426_s_at  | <i>OR3A3</i>     | 2.63   | 2.45   | 2.46   |
| 217994_x_at  | <i>CPSF3L</i>    | 4.575  | 4.275  | 4.265  |
| 232380_at    | <i>FLJ10986</i>  | 3.03   | 2.84   | 2.82   |
| 227845_s_at  | <i>SHD</i>       | 2.275  | 2.115  | 2.115  |
| 213821_s_at  | <i>IDS</i>       | 2.505  | 2.345  | 2.335  |
| 1566266_at   | <i>NA</i>        | 3.025  | 2.835  | 2.815  |
| 221480_at    | <i>HNRPD</i>     | 10.495 | 9.785  | 9.805  |

|              |                 |       |       |       |
|--------------|-----------------|-------|-------|-------|
| 237798_at    | <i>MSRA</i>     | 3.155 | 2.955 | 2.925 |
| 227661_at    | <i>ANKRD11</i>  | 2.19  | 2.05  | 2.05  |
| 201094_at    | <i>RPS29</i>    | 14.62 | 13.64 | 13.64 |
| 243782_at    | <i>NA</i>       | 2.77  | 2.6   | 2.58  |
| 230271_at    | <i>ONECUT2</i>  | 2.28  | 2.13  | 2.12  |
| 227393_at    | <i>TMEM16J</i>  | 2.38  | 2.22  | 2.22  |
| 244696_at    | <i>AFF3</i>     | 2.215 | 2.065 | 2.075 |
| 215115_x_at  | <i>NTRK3</i>    | 2.195 | 2.055 | 2.055 |
| 232539_at    | <i>NA</i>       | 4.955 | 4.625 | 4.615 |
| 61874_at     | <i>C9orf7</i>   | 4.21  | 3.94  | 3.91  |
| 241313_at    | <i>DOCK4</i>    | 2.12  | 1.98  | 1.98  |
| 233776_at    | <i>PTPRA</i>    | 2.62  | 2.45  | 2.44  |
| 215381_at    | <i>FRAP1</i>    | 2.38  | 2.22  | 2.22  |
| 232818_at    | <i>FAM78B</i>   | 2.71  | 2.53  | 2.53  |
| 1568625_at   | <i>NA</i>       | 2.505 | 2.345 | 2.335 |
| 1552474_a_at | <i>GAMT</i>     | 2.46  | 2.3   | 2.3   |
| 204877_s_at  | <i>TAOK2</i>    | 2.675 | 2.505 | 2.485 |
| 206655_s_at  | <i>GP1BB</i>    | 2.615 | 2.445 | 2.435 |
| 207487_at    | <i>FLJ11996</i> | 3.01  | 2.82  | 2.8   |
| 1569111_at   | <i>SOX13</i>    | 2.565 | 2.385 | 2.395 |
| 237642_at    | <i>MGC21675</i> | 3.215 | 2.995 | 3.005 |
| 228666_at    | <i>C15orf38</i> | 2.775 | 2.595 | 2.595 |
| 1561010_a_at | <i>MAOB</i>     | 2.65  | 2.48  | 2.47  |
| 236699_at    | <i>MBNL2</i>    | 2.39  | 2.23  | 2.23  |
| 38521_at     | <i>CD22</i>     | 2.93  | 2.73  | 2.74  |
| 238938_at    | <i>THADA</i>    | 2.61  | 2.44  | 2.43  |
| 1555548_at   | <i>NDUFA10</i>  | 3.225 | 3.015 | 3.005 |
| 214182_at    | <i>ARF6</i>     | 13.53 | 12.62 | 12.64 |
| 203788_s_at  | <i>SEMA3C</i>   | 2.825 | 2.645 | 2.645 |
| 208314_at    | <i>RRH</i>      | 2.42  | 2.26  | 2.26  |
| 220941_s_at  | <i>C21orf91</i> | 3.03  | 2.84  | 2.82  |

|              |                  |        |        |        |
|--------------|------------------|--------|--------|--------|
| 1559105_at   | <i>LOC152084</i> | 3.05   | 2.86   | 2.84   |
| 237422_at    | <i>ARL6IP2</i>   | 3.115  | 2.905  | 2.915  |
| 235654_at    | <i>NA</i>        | 2.69   | 2.52   | 2.5    |
| 1569560_at   | <i>HIRA</i>      | 2.855  | 2.675  | 2.665  |
| 1559497_at   | <i>NA</i>        | 2.855  | 2.675  | 2.665  |
| 1569426_at   | <i>NA</i>        | 2.965  | 2.765  | 2.765  |
| 205359_at    | <i>AKAP6</i>     | 2.265  | 2.115  | 2.105  |
| 212743_at    | <i>RCHY1</i>     | 2.785  | 2.595  | 2.605  |
| 224005_at    | <i>LOC727788</i> | 2.255  | 2.105  | 2.115  |
| 239104_at    | <i>CENTD1</i>    | 2.515  | 2.345  | 2.355  |
| 1565660_at   | <i>FUT6</i>      | 3.785  | 3.545  | 3.515  |
| 238950_at    | <i>NA</i>        | 2.545  | 2.375  | 2.385  |
| 231144_at    | <i>SMARCD3</i>   | 2.4    | 2.24   | 2.24   |
| 1557012_a_at | <i>NA</i>        | 3.34   | 3.12   | 3.12   |
| 234101_at    | <i>C3orf50</i>   | 2.605  | 2.435  | 2.425  |
| 225793_at    | <i>LIXIL</i>     | 10.825 | 10.145 | 10.065 |
| 200651_at    | <i>GNB2L1</i>    | 11.575 | 10.845 | 10.785 |
| 226915_s_at  | <i>ARPC5L</i>    | 9.36   | 8.72   | 8.76   |
| 214987_at    | <i>NA</i>        | 2.985  | 2.795  | 2.785  |
| 210376_x_at  | <i>ELK1</i>      | 2.505  | 2.345  | 2.335  |
| 216296_at    | <i>CLTA</i>      | 2.485  | 2.325  | 2.325  |
| 208024_s_at  | <i>DGCR6</i>     | 4.955  | 4.645  | 4.615  |
| 241533_at    | <i>LOC731656</i> | 2.69   | 2.52   | 2.51   |
| 234231_at    | <i>LOC197350</i> | 2.43   | 2.27   | 2.27   |
| 232580_x_at  | <i>PPM1B</i>     | 3.255  | 3.035  | 3.035  |
| 242992_at    | <i>ZNF551</i>    | 2.585  | 2.415  | 2.405  |
| 241737_x_at  | <i>NA</i>        | 2.8    | 2.62   | 2.62   |
| 204516_at    | <i>ATXN7</i>     | 10.165 | 9.455  | 9.525  |
| 215538_at    | <i>LARGE</i>     | 2.63   | 2.46   | 2.45   |
| 226347_at    | <i>FUT11</i>     | 12.11  | 11.26  | 11.36  |
| 232962_x_at  | <i>NA</i>        | 3.155  | 2.955  | 2.945  |

|              |                  |        |       |       |
|--------------|------------------|--------|-------|-------|
| 1566269_at   | <i>GARNL1</i>    | 2.76   | 2.58  | 2.58  |
| 1552396_at   | <i>WFDC6</i>     | 2.54   | 2.38  | 2.37  |
| 241517_at    | <i>DDEF1</i>     | 2.525  | 2.365 | 2.365 |
| 1568867_x_at | <i>GPATCH8</i>   | 3.495  | 3.255 | 3.265 |
| 237754_at    | <i>LOC730018</i> | 2.16   | 2.02  | 2.02  |
| 205118_at    | <i>FPRI</i>      | 3.13   | 2.93  | 2.93  |
| 201357_s_at  | <i>SF3A1</i>     | 3.775  | 3.515 | 3.545 |
| 228916_at    | <i>CWF19L2</i>   | 5.16   | 4.8   | 4.84  |
| 209096_at    | <i>UBE2V2</i>    | 11.16  | 10.43 | 10.41 |
| 1566204_at   | <i>NA</i>        | 2.765  | 2.595 | 2.575 |
| 237647_at    | <i>GHRL</i>      | 2.34   | 2.18  | 2.18  |
| 1555650_at   | <i>KLHL17</i>    | 2.045  | 1.905 | 1.905 |
| 208507_at    | <i>OR7C2</i>     | 2.075  | 1.935 | 1.935 |
| 237211_x_at  | <i>MORN3</i>     | 2.66   | 2.48  | 2.48  |
| 1568248_x_at | <i>SNORA71B</i>  | 2.38   | 2.22  | 2.23  |
| 1553341_at   | <i>UROCI</i>     | 2.54   | 2.38  | 2.37  |
| 228968_at    | <i>ZNF449</i>    | 8.79   | 8.18  | 8.24  |
| 224510_s_at  | <i>CLPB</i>      | 2.52   | 2.35  | 2.36  |
| 201726_at    | <i>ELAVL1</i>    | 10.605 | 9.915 | 9.895 |
| 202075_s_at  | <i>PLTP</i>      | 2.52   | 2.36  | 2.35  |
| 234832_at    | <i>ANTXR1</i>    | 2.45   | 2.3   | 2.28  |
| 1561584_at   | <i>NA</i>        | 2.79   | 2.61  | 2.6   |
| 225083_at    | <i>C6orf51</i>   | 13.68  | 12.83 | 12.73 |
| 236111_at    | <i>NA</i>        | 2.915  | 2.725 | 2.715 |
| 241752_at    | <i>SLC8A1</i>    | 2.45   | 2.29  | 2.29  |
| 223531_x_at  | <i>GPR89A</i>    | 7.26   | 6.76  | 6.8   |
| 1562391_at   | <i>B3GALNT2</i>  | 3.085  | 2.875 | 2.885 |
| 211620_x_at  | <i>RUNX1</i>     | 2.67   | 2.49  | 2.49  |
| 210472_at    | <i>MT1G</i>      | 2.635  | 2.465 | 2.455 |
| 1564352_at   | <i>CECR3</i>     | 2.4    | 2.25  | 2.24  |
| 221238_at    | <i>NSBP1</i>     | 3      | 2.81  | 2.79  |

|              |                  |        |        |        |
|--------------|------------------|--------|--------|--------|
| 233869_x_at  | <i>DLG1</i>      | 3.65   | 3.4    | 3.42   |
| 231833_at    | <i>PRR8</i>      | 2.565  | 2.395  | 2.405  |
| 237781_at    | <i>HORMAD2</i>   | 2.56   | 2.4    | 2.39   |
| 56748_at     | <i>TRIM10</i>    | 3.005  | 2.815  | 2.805  |
| 1558619_at   | <i>SNHG7</i>     | 2.465  | 2.305  | 2.305  |
| 1552466_x_at | <i>C21orf100</i> | 3.115  | 2.915  | 2.905  |
| 208347_at    | <i>NA</i>        | 2.79   | 2.61   | 2.6    |
| 235785_at    | <i>ATBF1</i>     | 2.4    | 2.24   | 2.24   |
| 240886_at    | <i>CASR</i>      | 3.415  | 3.195  | 3.185  |
| 1570536_at   | <i>NA</i>        | 2.2    | 2.05   | 2.06   |
| 237724_at    | <i>RNF190</i>    | 2.54   | 2.38   | 2.38   |
| 238393_at    | <i>BMPR2</i>     | 3.205  | 3.005  | 2.995  |
| 1570261_at   | <i>MARS2</i>     | 2.69   | 2.52   | 2.51   |
| 221481_x_at  | <i>HNRPD</i>     | 13.595 | 12.695 | 12.725 |
| 206945_at    | <i>LCT</i>       | 2.5    | 2.34   | 2.34   |
| 211233_x_at  | <i>ESR1</i>      | 2.2    | 2.06   | 2.05   |
| 224398_at    | <i>NA</i>        | 2.68   | 2.51   | 2.5    |
| 242241_x_at  | <i>WDR89</i>     | 3.655  | 3.425  | 3.405  |
| 40665_at     | <i>FMO3</i>      | 2.43   | 2.27   | 2.27   |
| 235375_x_at  | <i>TTC9B</i>     | 2.37   | 2.21   | 2.21   |
| 1552722_at   | <i>ARPP-21</i>   | 3.04   | 2.84   | 2.84   |
| 1556405_s_at | <i>LOC374890</i> | 2.48   | 2.32   | 2.32   |
| 1554676_at   | <i>SRGN</i>      | 2.935  | 2.735  | 2.745  |
| 205745_x_at  | <i>ADAM17</i>    | 8.995  | 8.445  | 8.385  |
| 1563841_at   | <i>MEIS2</i>     | 2.76   | 2.58   | 2.58   |
| 236154_at    | <i>NA</i>        | 2.97   | 2.77   | 2.77   |
| 206940_s_at  | <i>POU4F1</i>    | 2.555  | 2.395  | 2.395  |
| 215921_at    | <i>LOC23117</i>  | 2.595  | 2.435  | 2.425  |
| 224944_at    | <i>TMPO</i>      | 8.6    | 8.06   | 8.02   |
| 1570337_at   | <i>FIGLA</i>     | 2.325  | 2.175  | 2.165  |
| 1566438_at   | <i>HS6ST3</i>    | 2.625  | 2.455  | 2.445  |

|              |                      |        |        |        |
|--------------|----------------------|--------|--------|--------|
| 1560979_a_at | <i>NA</i>            | 3.07   | 2.87   | 2.87   |
| 207499_x_at  | <i>UNC45A</i>        | 4.88   | 4.56   | 4.56   |
| 224061_at    | <i>INMT</i>          | 2.565  | 2.395  | 2.405  |
| 239543_s_at  | <i>NA</i>            | 2.865  | 2.685  | 2.685  |
| 1557771_at   | <i>FHAD1</i>         | 2.985  | 2.795  | 2.785  |
| 237826_at    | <i>HLA-A</i>         | 2.335  | 2.175  | 2.175  |
| 235910_x_at  | <i>NA</i>            | 2.735  | 2.565  | 2.555  |
| 1564525_at   | <i>NA</i>            | 3.185  | 2.975  | 2.985  |
| 1559756_at   | <i>DKFZp667F0711</i> | 3.11   | 2.91   | 2.9    |
| 1564052_at   | <i>TREML4</i>        | 2.16   | 2.02   | 2.02   |
| 201994_at    | <i>MORF4L2</i>       | 14.525 | 13.575 | 13.595 |
| 243733_at    | <i>NEDD8</i>         | 3.22   | 3.01   | 3.02   |
| 1557835_at   | <i>TMEM112</i>       | 2.19   | 2.04   | 2.06   |
| 233014_at    | <i>ID11</i>          | 4.515  | 4.215  | 4.225  |
| 213182_x_at  | <i>CDKN1C</i>        | 2.71   | 2.53   | 2.53   |
| 1565763_at   | <i>C13orf33</i>      | 2.24   | 2.1    | 2.1    |
| 1560978_at   | <i>NA</i>            | 2.365  | 2.215  | 2.205  |
| 233424_at    | <i>NRXN1</i>         | 3.535  | 3.315  | 3.305  |
| 1561144_at   | <i>NCAPD2</i>        | 3.335  | 3.115  | 3.115  |
| 210453_x_at  | <i>ATP5L</i>         | 10.145 | 9.475  | 9.505  |
| 207274_at    | <i>CHRNE</i>         | 2.77   | 2.59   | 2.59   |
| 236773_at    | <i>NA</i>            | 3.18   | 2.97   | 2.98   |
| 233284_at    | <i>LYRM5</i>         | 2.885  | 2.705  | 2.695  |
| 231545_at    | <i>OTP</i>           | 2.49   | 2.33   | 2.33   |
| 208373_s_at  | <i>P2RY6</i>         | 2.81   | 2.63   | 2.63   |
| 242276_at    | <i>C18orf2</i>       | 2.79   | 2.61   | 2.61   |
| 216647_at    | <i>TCF3</i>          | 3.845  | 3.605  | 3.595  |
| 241878_at    | <i>MTHFD1L</i>       | 2.285  | 2.145  | 2.145  |
| 243646_at    | <i>C9orf41</i>       | 2.85   | 2.67   | 2.67   |
| 235219_at    | <i>LOC116349</i>     | 3.945  | 3.685  | 3.695  |
| 207366_at    | <i>KCNS1</i>         | 5.5    | 5.14   | 5.15   |

|              |                 |        |        |        |
|--------------|-----------------|--------|--------|--------|
| 223744_s_at  | <i>SIAE</i>     | 2.225  | 2.085  | 2.085  |
| 237481_at    | <i>ACAD10</i>   | 3.165  | 2.955  | 2.965  |
| 1559681_a_at | <i>TRIM16L</i>  | 2.51   | 2.35   | 2.35   |
| 216110_x_at  | <i>NA</i>       | 3.245  | 3.035  | 3.045  |
| 233090_at    | <i>GPC6</i>     | 2.38   | 2.22   | 2.22   |
| 227811_at    | <i>FGD3</i>     | 2.575  | 2.415  | 2.415  |
| 215511_at    | <i>TCF20</i>    | 2.12   | 1.98   | 1.98   |
| 206353_at    | <i>COX6A2</i>   | 2.355  | 2.205  | 2.195  |
| 1559843_s_at | <i>ABCA11</i>   | 3.19   | 2.98   | 2.99   |
| 239418_x_at  | <i>ENTPD1</i>   | 3.325  | 3.095  | 3.115  |
| 211392_s_at  | <i>PATZ1</i>    | 2.47   | 2.31   | 2.31   |
| 239647_at    | <i>CHST13</i>   | 2.41   | 2.26   | 2.25   |
| 209166_s_at  | <i>MAN2B1</i>   | 7.115  | 6.645  | 6.675  |
| 240123_at    | <i>NA</i>       | 2.56   | 2.4    | 2.39   |
| 213428_s_at  | <i>COL6A1</i>   | 14.37  | 13.49  | 13.4   |
| 208195_at    | <i>TTN</i>      | 2.37   | 2.22   | 2.21   |
| 229353_s_at  | <i>NUCKS1</i>   | 15.83  | 14.83  | 14.79  |
| 232305_at    | <i>HMGCLL1</i>  | 3      | 2.81   | 2.8    |
| 208073_x_at  | <i>TTC3</i>     | 12.76  | 11.98  | 11.9   |
| 201448_at    | <i>TIA1</i>     | 10.85  | 10.13  | 10.18  |
| 224091_at    | <i>NA</i>       | 2.79   | 2.62   | 2.61   |
| 223884_at    | <i>OPTC</i>     | 2.57   | 2.41   | 2.41   |
| 220730_at    | <i>FLJ12986</i> | 2.685  | 2.505  | 2.515  |
| 207601_at    | <i>SULT1B1</i>  | 2.525  | 2.365  | 2.365  |
| 224567_x_at  | <i>MALAT1</i>   | 15.075 | 14.165 | 14.055 |
| 222952_s_at  | <i>TLR7</i>     | 2.45   | 2.29   | 2.29   |
| 1563649_at   | <i>NA</i>       | 3.335  | 3.125  | 3.105  |
| 202297_s_at  | <i>RERI</i>     | 12.41  | 11.63  | 11.59  |
| 223371_s_at  | <i>DNAJC4</i>   | 2.43   | 2.27   | 2.27   |
| 217238_s_at  | <i>ALDOB</i>    | 2.435  | 2.275  | 2.275  |
| 1557842_at   | <i>NA</i>       | 2.965  | 2.785  | 2.775  |



|              |                 |       |       |       |
|--------------|-----------------|-------|-------|-------|
| 237538_at    | <i>RSAD2</i>    | 2.635 | 2.475 | 2.475 |
| 226918_at    | <i>JPH4</i>     | 2.455 | 2.295 | 2.295 |
| 1562342_at   | <i>DACHI</i>    | 3.49  | 3.27  | 3.27  |
| 206340_at    | <i>NR1H4</i>    | 2.635 | 2.475 | 2.465 |
| 244104_at    | <i>MGAT3</i>    | 3.385 | 3.165 | 3.165 |
| 217553_at    | <i>EEF1A1</i>   | 7.345 | 6.855 | 6.905 |
| 242952_at    | <i>HDAC9</i>    | 3.315 | 3.105 | 3.095 |
| 1560446_at   | <i>ZNF724P</i>  | 2.295 | 2.155 | 2.155 |
| 219858_s_at  | <i>FLJ20160</i> | 3.16  | 2.95  | 2.97  |
| 203551_s_at  | <i>COX11</i>    | 9.005 | 8.445 | 8.415 |
| 224526_at    | <i>FAM79B</i>   | 2.62  | 2.46  | 2.45  |
| 242322_at    | <i>NA</i>       | 2.45  | 2.29  | 2.29  |
| 227206_at    | <i>NDUFA10</i>  | 2.425 | 2.265 | 2.265 |
| 210633_x_at  | <i>KRT10</i>    | 12.27 | 11.45 | 11.53 |
| 227589_at    | <i>PITPNC1</i>  | 2.27  | 2.13  | 2.13  |
| 238502_at    | <i>MORF4L2</i>  | 3.15  | 2.95  | 2.95  |
| 1563396_x_at | <i>NA</i>       | 3.015 | 2.825 | 2.805 |
| 237008_at    | <i>NA</i>       | 2.47  | 2.31  | 2.31  |
| 239063_at    | <i>NA</i>       | 2.815 | 2.635 | 2.635 |
| 206107_at    | <i>RGS11</i>    | 2.33  | 2.19  | 2.18  |
| 227944_at    | <i>PTPN3</i>    | 2.5   | 2.34  | 2.34  |
| 1561375_at   | <i>NA</i>       | 2.415 | 2.255 | 2.265 |
| 205673_s_at  | <i>ASB9</i>     | 2.8   | 2.62  | 2.62  |
| 1569751_at   | <i>MGC51025</i> | 2.8   | 2.62  | 2.62  |
| 1561595_x_at | <i>NA</i>       | 2.365 | 2.225 | 2.215 |
| 230546_at    | <i>VASH1</i>    | 2.81  | 2.62  | 2.64  |
| 212998_x_at  | <i>HLA-DQB1</i> | 2.44  | 2.29  | 2.28  |
| 216793_x_at  | <i>NA</i>       | 3.125 | 2.935 | 2.915 |
| 234720_s_at  | <i>TOB2</i>     | 2.51  | 2.35  | 2.35  |
| 229980_s_at  | <i>SNX5</i>     | 12.29 | 11.49 | 11.53 |
| 1569552_at   | <i>PTPN18</i>   | 3.275 | 3.075 | 3.075 |

|              |                      |        |        |        |
|--------------|----------------------|--------|--------|--------|
| 213441_x_at  | <i>SPDEF</i>         | 2.19   | 2.05   | 2.05   |
| 220600_at    | <i>TMEM103</i>       | 2.905  | 2.725  | 2.725  |
| 228074_at    | <i>LOC162073</i>     | 2.3    | 2.16   | 2.16   |
| 216300_x_at  | <i>RARA</i>          | 4.635  | 4.335  | 4.345  |
| 1566217_at   | <i>A2BP1</i>         | 3.2    | 3      | 2.99   |
| 242446_at    | <i>C6orf163</i>      | 3.075  | 2.885  | 2.875  |
| 243045_at    | <i>SMYD1</i>         | 2.895  | 2.715  | 2.705  |
| 230989_s_at  | <i>TSSK6</i>         | 2.34   | 2.19   | 2.2    |
| 1557512_at   | <i>CLIP1</i>         | 2.84   | 2.66   | 2.66   |
| 215841_at    | <i>GUCA1B</i>        | 2.325  | 2.185  | 2.175  |
| 209521_s_at  | <i>AMOT</i>          | 2.675  | 2.515  | 2.505  |
| 208481_at    | <i>ASB4</i>          | 2.805  | 2.625  | 2.625  |
| 236690_at    | <i>RHBDD1</i>        | 2.52   | 2.37   | 2.36   |
| 211424_x_at  | <i>METTL7A</i>       | 3.18   | 2.98   | 2.98   |
| 240548_at    | <i>GTDC1</i>         | 3.23   | 3.02   | 3.04   |
| 215099_s_at  | <i>RXRΒ</i>          | 2.485  | 2.325  | 2.325  |
| 229379_at    | <i>AHDC1</i>         | 2.22   | 2.08   | 2.08   |
| 1556933_at   | <i>SPIN1</i>         | 2.92   | 2.75   | 2.73   |
| 238225_at    | <i>NA</i>            | 2.455  | 2.305  | 2.295  |
| 207449_s_at  | <i>POFUT2</i>        | 2.51   | 2.35   | 2.35   |
| 218932_at    | <i>C1orf181</i>      | 9.405  | 8.845  | 8.795  |
| 206620_at    | <i>GRAP</i>          | 2.345  | 2.205  | 2.205  |
| 206447_at    | <i>ELAI</i>          | 2.55   | 2.39   | 2.39   |
| 206645_s_at  | <i>NR0B1</i>         | 2.515  | 2.365  | 2.355  |
| 235815_at    | <i>TSHZ2</i>         | 2.405  | 2.245  | 2.255  |
| 216406_at    | <i>NA</i>            | 2.92   | 2.74   | 2.74   |
| 239025_at    | <i>RP11-262H14.4</i> | 2.97   | 2.79   | 2.78   |
| 1552426_a_at | <i>TM2D3</i>         | 10.895 | 10.225 | 10.205 |
| 207189_s_at  | <i>ZZEF1</i>         | 3.605  | 3.375  | 3.395  |
| 238281_at    | <i>RBMS1</i>         | 2.345  | 2.205  | 2.205  |
| 222247_at    | <i>DXS542</i>        | 2.295  | 2.155  | 2.155  |

|              |                  |        |        |        |
|--------------|------------------|--------|--------|--------|
| 230595_at    | <i>LOC572558</i> | 2.355  | 2.215  | 2.205  |
| 218571_s_at  | <i>CHMP4A</i>    | 12.445 | 11.685 | 11.645 |
| 239279_at    | <i>LZTR2</i>     | 2.975  | 2.795  | 2.785  |
| 242902_at    | <i>LOC643160</i> | 2.37   | 2.23   | 2.22   |
| 212413_at    | 6-Sep            | 6.42   | 6.02   | 6.02   |
| 238901_at    | <i>SLAMF9</i>    | 2.88   | 2.7    | 2.7    |
| 213730_x_at  | <i>TCF3</i>      | 9.1    | 8.54   | 8.54   |
| 1555707_at   | <i>TNAP</i>      | 2.655  | 2.485  | 2.495  |
| 210629_x_at  | <i>LST1</i>      | 2.285  | 2.145  | 2.145  |
| 225053_at    | <i>CNOT7</i>     | 11.57  | 10.86  | 10.84  |
| 1560784_x_at | <i>NA</i>        | 2.6    | 2.44   | 2.44   |
| 1558392_at   | <i>SYNE2</i>     | 2.785  | 2.605  | 2.605  |
| 242345_at    | <i>tcag7.216</i> | 2.65   | 2.49   | 2.49   |
| 205305_at    | <i>FGL1</i>      | 2.715  | 2.555  | 2.545  |
| 1560204_at   | <i>NT5DC4</i>    | 3.085  | 2.895  | 2.885  |
| 219124_at    | <i>C8orf41</i>   | 6.495  | 6.085  | 6.095  |
| 235885_at    | <i>MED12L</i>    | 2.97   | 2.8    | 2.78   |
| 202023_at    | <i>EFNA1</i>     | 2.475  | 2.315  | 2.315  |
| 230589_at    | <i>TRAF3IP2</i>  | 2.345  | 2.205  | 2.195  |
| 1558814_s_at | <i>TMED5</i>     | 2.63   | 2.47   | 2.47   |
| 244461_at    | <i>SPECC1</i>    | 2.815  | 2.635  | 2.645  |
| 217157_x_at  | <i>NA</i>        | 2.665  | 2.505  | 2.495  |
| 224996_at    | <i>MGC34646</i>  | 12.415 | 11.665 | 11.635 |
| 1558343_at   | <i>NA</i>        | 2.27   | 2.13   | 2.13   |
| 241875_at    | <i>NA</i>        | 2.695  | 2.535  | 2.525  |
| 233401_at    | <i>NRCAM</i>     | 2.86   | 2.68   | 2.68   |
| 244383_at    | <i>NA</i>        | 3.025  | 2.845  | 2.845  |
| 231687_at    | <i>C1orf173</i>  | 2.495  | 2.335  | 2.335  |
| 243446_at    | <i>C14orf94</i>  | 2.355  | 2.215  | 2.215  |
| 232610_at    | <i>PARP14</i>    | 2.55   | 2.4    | 2.39   |
| 1556808_at   | <i>LOC121906</i> | 2.28   | 2.14   | 2.14   |

|              |                  |        |        |        |
|--------------|------------------|--------|--------|--------|
| 238110_at    | <i>SAPS2</i>     | 3.12   | 2.92   | 2.93   |
| 211542_x_at  | <i>RPS10</i>     | 11.05  | 10.33  | 10.4   |
| 1557214_at   | <i>NA</i>        | 2.54   | 2.38   | 2.38   |
| 233979_s_at  | <i>ESPN</i>      | 2.89   | 2.71   | 2.71   |
| 232486_at    | <i>LRFN1</i>     | 2.815  | 2.645  | 2.635  |
| 236218_at    | <i>PHOSPHO1</i>  | 2.33   | 2.19   | 2.19   |
| 214251_s_at  | <i>NUMA1</i>     | 2.97   | 2.79   | 2.79   |
| 211222_s_at  | <i>HAPI</i>      | 2.485  | 2.325  | 2.325  |
| 200817_x_at  | <i>RPS10</i>     | 11.125 | 10.445 | 10.445 |
| 241035_s_at  | <i>NA</i>        | 2.495  | 2.335  | 2.335  |
| 219958_at    | <i>C20orf46</i>  | 2.5    | 2.34   | 2.35   |
| 202403_s_at  | <i>COL1A2</i>    | 15.5   | 14.59  | 14.49  |
| 218193_s_at  | <i>GOLT1B</i>    | 12.415 | 11.625 | 11.675 |
| 204017_at    | <i>KDELR3</i>    | 12.475 | 11.665 | 11.755 |
| 209404_s_at  | <i>TMED7</i>     | 10.72  | 10.07  | 10.05  |
| 210940_s_at  | <i>GRM1</i>      | 2.98   | 2.8    | 2.8    |
| 241452_at    | <i>NA</i>        | 3.065  | 2.885  | 2.875  |
| 1557059_at   | <i>LOC440902</i> | 3.335  | 3.135  | 3.125  |
| 212800_at    | <i>STX6</i>      | 5.915  | 5.555  | 5.555  |
| 217119_s_at  | <i>CXCR3</i>     | 2.445  | 2.285  | 2.295  |
| 1561232_at   | <i>NA</i>        | 2.27   | 2.13   | 2.13   |
| 202646_s_at  | <i>CSDE1</i>     | 13.355 | 12.585 | 12.485 |
| 237720_at    | <i>ASB4</i>      | 2.83   | 2.66   | 2.65   |
| 238503_at    | <i>CNIH3</i>     | 2.955  | 2.775  | 2.775  |
| 220166_at    | <i>CNNM1</i>     | 2.665  | 2.505  | 2.505  |
| 1554766_s_at | <i>PVT1</i>      | 2.865  | 2.695  | 2.685  |
| 1561702_at   | <i>NA</i>        | 2.54   | 2.39   | 2.38   |
| 1558607_at   | <i>PAPPA</i>     | 3.56   | 3.35   | 3.33   |
| 239644_at    | <i>FLJ37440</i>  | 3.455  | 3.245  | 3.225  |
| 207114_at    | <i>LY6G6C</i>    | 2.465  | 2.315  | 2.305  |
| 243127_x_at  | <i>TRAP1</i>     | 3.56   | 3.34   | 3.34   |

|              |                      |       |       |       |
|--------------|----------------------|-------|-------|-------|
| 210159_s_at  | <i>TRIM31</i>        | 2.755 | 2.585 | 2.595 |
| 209119_x_at  | <i>NR2F2</i>         | 5.045 | 4.745 | 4.735 |
| 240526_at    | <i>ATP11A</i>        | 3.28  | 3.08  | 3.08  |
| 234845_at    | <i>DKFZp761P0212</i> | 2.95  | 2.77  | 2.76  |
| 209775_x_at  | <i>SLC19A1</i>       | 2.26  | 2.12  | 2.12  |
| 1563072_at   | <i>NA</i>            | 3.02  | 2.83  | 2.84  |
| 243563_at    | <i>C1orf82</i>       | 3.095 | 2.915 | 2.905 |
| 244816_at    | <i>NA</i>            | 2.51  | 2.36  | 2.35  |
| 239910_at    | <i>PSG1</i>          | 2.395 | 2.255 | 2.245 |
| 237605_at    | <i>NA</i>            | 2.95  | 2.78  | 2.76  |
| 237103_at    | <i>SRC</i>           | 2.795 | 2.625 | 2.615 |
| 206333_at    | <i>MSI1</i>          | 3.005 | 2.825 | 2.815 |
| 237362_at    | <i>ZFP41</i>         | 2.625 | 2.465 | 2.465 |
| 224547_at    | <i>NA</i>            | 2.385 | 2.245 | 2.235 |
| 230128_at    | <i>IGL@</i>          | 2.93  | 2.76  | 2.74  |
| 230485_at    | <i>LOC644844</i>     | 2.465 | 2.305 | 2.315 |
| 219245_s_at  | <i>OGFOD2</i>        | 2.91  | 2.74  | 2.72  |
| 216575_at    | <i>NA</i>            | 3.26  | 3.06  | 3.06  |
| 239911_at    | <i>ONECUT2</i>       | 3.125 | 2.935 | 2.925 |
| 214990_at    | <i>PIGO</i>          | 3.015 | 2.825 | 2.845 |
| 223175_s_at  | <i>FEM1A</i>         | 7.315 | 6.855 | 6.885 |
| 229226_at    | <i>MMS19L</i>        | 3.07  | 2.88  | 2.89  |
| 211951_at    | <i>NOLC1</i>         | 12.14 | 11.36 | 11.44 |
| 236950_s_at  | <i>LOC157381</i>     | 2.825 | 2.655 | 2.645 |
| 234015_at    | <i>NAALADL2</i>      | 3.065 | 2.885 | 2.885 |
| 226299_at    | <i>PKN3</i>          | 2.685 | 2.525 | 2.525 |
| 234156_at    | <i>MICAL2</i>        | 3.94  | 3.7   | 3.7   |
| 1552518_s_at | <i>MTBP</i>          | 3.35  | 3.16  | 3.14  |
| 240882_at    | <i>NA</i>            | 3.045 | 2.865 | 2.865 |
| 1569296_a_at | <i>LOC493754</i>     | 2.08  | 1.96  | 1.96  |
| 1560743_a_at | <i>ALS2</i>          | 2.99  | 2.81  | 2.81  |

|              |                  |        |        |        |
|--------------|------------------|--------|--------|--------|
| 231363_at    | <i>LELPI</i>     | 3.26   | 3.07   | 3.05   |
| 1554810_at   | <i>PLA2G4C</i>   | 3.165  | 2.965  | 2.975  |
| 231679_at    | <i>NA</i>        | 2.62   | 2.46   | 2.46   |
| 242236_at    | <i>NA</i>        | 2.605  | 2.445  | 2.445  |
| 239641_at    | <i>FLII</i>      | 2.68   | 2.52   | 2.52   |
| 234284_at    | <i>GNG8</i>      | 2.68   | 2.53   | 2.51   |
| 219927_at    | <i>FCFI</i>      | 2.865  | 2.695  | 2.685  |
| 1559566_at   | <i>FBXO42</i>    | 2.835  | 2.655  | 2.665  |
| 1566473_a_at | <i>LOC647305</i> | 3.155  | 2.955  | 2.965  |
| 1553799_at   | <i>C15orf33</i>  | 2.93   | 2.76   | 2.75   |
| 233896_s_at  | <i>PAPLN</i>     | 2.485  | 2.335  | 2.325  |
| 205246_at    | <i>PEX13</i>     | 5.07   | 4.78   | 4.75   |
| 240038_at    | <i>ELL2</i>      | 8.015  | 7.555  | 7.515  |
| 217285_at    | <i>DGCR14</i>    | 2.2    | 2.06   | 2.07   |
| 208749_x_at  | <i>FLOT1</i>     | 7.775  | 7.305  | 7.295  |
| 240119_at    | <i>TEPP</i>      | 2.235  | 2.095  | 2.095  |
| 1566156_at   | <i>NA</i>        | 2.065  | 1.945  | 1.945  |
| 227496_at    | <i>LOC253842</i> | 2.55   | 2.39   | 2.39   |
| 238561_s_at  | <i>C8orf53</i>   | 2.59   | 2.43   | 2.43   |
| 1561334_at   | <i>LOC285181</i> | 2.505  | 2.355  | 2.345  |
| 210738_s_at  | <i>SLC4A4</i>    | 3      | 2.82   | 2.82   |
| 1565836_at   | <i>NA</i>        | 2.095  | 1.975  | 1.975  |
| 228973_at    | <i>DLG2</i>      | 2.535  | 2.375  | 2.375  |
| 233229_at    | <i>SCFD1</i>     | 2.57   | 2.41   | 2.42   |
| 1567014_s_at | <i>NFE2L2</i>    | 3.395  | 3.195  | 3.195  |
| 205245_at    | <i>PARD6A</i>    | 3.185  | 2.995  | 2.985  |
| 1554564_a_at | <i>UNQ1887</i>   | 3.225  | 3.025  | 3.025  |
| 212709_at    | <i>NUP160</i>    | 9.025  | 8.505  | 8.465  |
| 243234_at    | <i>TBX3</i>      | 3      | 2.83   | 2.81   |
| 201896_s_at  | <i>PSRC1</i>     | 2.94   | 2.75   | 2.77   |
| 211445_x_at  | <i>NACAPI</i>    | 12.685 | 11.915 | 11.935 |

|              |                     |       |       |       |
|--------------|---------------------|-------|-------|-------|
| 215474_at    | <i>NSMCE2</i>       | 2.515 | 2.355 | 2.365 |
| 229188_s_at  | <i>ZNRF2</i>        | 2.67  | 2.51  | 2.5   |
| 239327_at    | <i>NA</i>           | 2.605 | 2.455 | 2.445 |
| 202830_s_at  | <i>SLC37A4</i>      | 3.785 | 3.555 | 3.565 |
| 213715_s_at  | <i>ANKRD47</i>      | 3.535 | 3.325 | 3.315 |
| 239511_s_at  | <i>SFRS4</i>        | 3.2   | 3     | 3     |
| 235437_at    | <i>NA</i>           | 2.745 | 2.585 | 2.585 |
| 1569963_at   | <i>NA</i>           | 3.84  | 3.61  | 3.6   |
| 215332_s_at  | <i>CD8B</i>         | 3.18  | 2.99  | 2.98  |
| 207979_s_at  | <i>CD8B</i>         | 2.34  | 2.2   | 2.2   |
| 237278_x_at  | <i>ATP2C1</i>       | 3.29  | 3.09  | 3.09  |
| 234473_at    | <i>RP11-408E5.4</i> | 2.915 | 2.745 | 2.725 |
| 1558764_at   | <i>NA</i>           | 3.27  | 3.08  | 3.06  |
| 238217_at    | <i>NA</i>           | 2.175 | 2.035 | 2.045 |
| 1554175_at   | <i>CD300LB</i>      | 2.34  | 2.2   | 2.2   |
| 1552816_at   | <i>C9orf121</i>     | 2.795 | 2.635 | 2.635 |
| 217359_s_at  | <i>NCAMI</i>        | 2.3   | 2.16  | 2.16  |
| 221089_at    | <i>NOX3</i>         | 2.445 | 2.305 | 2.305 |
| 222013_x_at  | <i>FAM86A</i>       | 4.67  | 4.38  | 4.4   |
| 1557647_a_at | <i>NA</i>           | 2.67  | 2.51  | 2.51  |
| 238778_at    | <i>MPP7</i>         | 2.71  | 2.55  | 2.55  |
| 1556821_x_at | <i>DLEU2</i>        | 2.89  | 2.72  | 2.71  |
| 243422_at    | <i>C21orf66</i>     | 2.97  | 2.79  | 2.79  |
| 1555062_s_at | <i>GTPBP3</i>       | 3.075 | 2.905 | 2.885 |
| 206564_at    | <i>OPRL1</i>        | 2.425 | 2.285 | 2.275 |
| 242528_at    | <i>HOXA5</i>        | 2.405 | 2.265 | 2.265 |
| 1553911_at   | <i>ZNF663</i>       | 2.59  | 2.44  | 2.43  |
| 222003_s_at  | <i>DOCK6</i>        | 2.595 | 2.435 | 2.435 |
| 224408_at    | <i>MCHR2</i>        | 2.39  | 2.25  | 2.25  |
| 1557685_at   | <i>FLJ30277</i>     | 2.69  | 2.53  | 2.53  |
| 212263_at    | <i>QKI</i>          | 8.885 | 8.355 | 8.345 |

|              |                  |        |        |        |
|--------------|------------------|--------|--------|--------|
| 1552594_at   | <i>MDAC1</i>     | 3.08   | 2.89   | 2.91   |
| 223011_s_at  | <i>OCIAD1</i>    | 10.755 | 10.085 | 10.135 |
| 223943_s_at  | <i>GNG2</i>      | 2.545  | 2.385  | 2.395  |
| 1570331_at   | <i>NA</i>        | 2.485  | 2.335  | 2.345  |
| 1570301_at   | <i>NA</i>        | 2.6    | 2.44   | 2.44   |
| 240004_at    | <i>GRM3</i>      | 2.27   | 2.13   | 2.13   |
| 1561663_at   | <i>NA</i>        | 3.055  | 2.865  | 2.885  |
| 1556624_at   | <i>CCDC92</i>    | 3.105  | 2.915  | 2.925  |
| 206647_at    | <i>HBZ</i>       | 2.63   | 2.47   | 2.47   |
| 205914_s_at  | <i>GRIN1</i>     | 2.35   | 2.21   | 2.21   |
| 237076_at    | <i>NCSTN</i>     | 2.58   | 2.42   | 2.43   |
| 236203_at    | <i>HLA-DQA1</i>  | 2.855  | 2.685  | 2.675  |
| 235210_s_at  | <i>RPESP</i>     | 2.495  | 2.355  | 2.355  |
| 236682_at    | <i>NA</i>        | 2.205  | 2.065  | 2.075  |
| 205151_s_at  | <i>KIAA0644</i>  | 2.37   | 2.23   | 2.23   |
| 207954_at    | <i>GATA2</i>     | 2.575  | 2.415  | 2.415  |
| 216795_at    | <i>NA</i>        | 2.55   | 2.4    | 2.39   |
| 244703_x_at  | <i>IPO9</i>      | 3.15   | 2.96   | 2.97   |
| 237269_at    | <i>EVII</i>      | 2.74   | 2.58   | 2.57   |
| 226835_s_at  | <i>C20orf199</i> | 7.31   | 6.86   | 6.89   |
| 228833_s_at  | <i>LOC400027</i> | 2.545  | 2.395  | 2.385  |
| 209961_s_at  | <i>HGF</i>       | 2.505  | 2.355  | 2.365  |
| 241173_at    | <i>NA</i>        | 3.61   | 3.4    | 3.39   |
| 1559063_at   | <i>C21orf63</i>  | 2.66   | 2.5    | 2.5    |
| 231976_at    | <i>LINS1</i>     | 2.565  | 2.415  | 2.405  |
| 206394_at    | <i>MYBPC2</i>    | 2.335  | 2.195  | 2.195  |
| 1569772_x_at | <i>NA</i>        | 2.875  | 2.705  | 2.695  |
| 212923_s_at  | <i>C6orf145</i>  | 12.04  | 11.28  | 11.36  |
| 230381_at    | <i>C1orf186</i>  | 2.915  | 2.735  | 2.745  |
| 234882_at    | <i>NA</i>        | 2.71   | 2.56   | 2.54   |
| 234216_at    | <i>FLJ21408</i>  | 2.275  | 2.135  | 2.135  |



|              |                  |       |       |       |
|--------------|------------------|-------|-------|-------|
| 232756_at    | <i>KALRN</i>     | 2.805 | 2.645 | 2.645 |
| 216259_at    | <i>BMPER</i>     | 3.09  | 2.92  | 2.9   |
| 230110_at    | <i>MCOLN2</i>    | 2.63  | 2.48  | 2.47  |
| 234102_at    | <i>RASL11B</i>   | 2.3   | 2.16  | 2.16  |
| 233786_at    | <i>NA</i>        | 2.925 | 2.755 | 2.745 |
| 213977_s_at  | <i>CIZ1</i>      | 3.225 | 3.025 | 3.035 |
| 219598_s_at  | <i>RWDD1</i>     | 12.28 | 11.56 | 11.56 |
| 234638_at    | <i>LARGE</i>     | 2.28  | 2.14  | 2.14  |
| 243625_at    | <i>CREB1</i>     | 3.235 | 3.035 | 3.045 |
| 244355_at    | <i>KIAA0241</i>  | 2.62  | 2.47  | 2.46  |
| 234046_at    | <i>NA</i>        | 3.155 | 2.985 | 2.965 |
| 207766_at    | <i>CDKL1</i>     | 2.455 | 2.305 | 2.315 |
| 227972_at    | <i>TOR2A</i>     | 4.265 | 4.005 | 4.015 |
| 213613_s_at  | <i>CDC2L2</i>    | 2.31  | 2.17  | 2.17  |
| 1556461_at   | <i>LOC730245</i> | 3.265 | 3.075 | 3.065 |
| 234685_x_at  | <i>KRTAP4-9</i>  | 2.235 | 2.095 | 2.105 |
| 233953_at    | <i>GUCA1C</i>    | 2.575 | 2.425 | 2.415 |
| 1555192_at   | <i>ZNF277P</i>   | 3.485 | 3.285 | 3.285 |
| 206991_s_at  | <i>CCR5</i>      | 2.905 | 2.735 | 2.725 |
| 221418_s_at  | <i>THRAP5</i>    | 2.68  | 2.53  | 2.52  |
| 1552490_at   | <i>LACE1</i>     | 2.625 | 2.475 | 2.465 |
| 205944_s_at  | <i>CLTCL1</i>    | 2.3   | 2.16  | 2.16  |
| 224759_s_at  | <i>C12orf23</i>  | 13.97 | 13.14 | 13.16 |
| 235172_at    | <i>GABPB2</i>    | 3.205 | 3.025 | 3.015 |
| 237649_at    | <i>COPS4</i>     | 2.845 | 2.685 | 2.675 |
| 1566953_x_at | <i>SIRT5</i>     | 2.615 | 2.465 | 2.455 |
| 1552736_a_at | <i>NETO1</i>     | 2.68  | 2.52  | 2.52  |
| 238122_at    | <i>RBM12B</i>    | 7.18  | 6.76  | 6.76  |
| 201400_at    | <i>PSMB3</i>     | 8.25  | 7.74  | 7.8   |
| 205701_at    | <i>IPO8</i>      | 2.37  | 2.24  | 2.22  |
| 1552349_a_at | <i>PRSS33</i>    | 2.37  | 2.23  | 2.23  |

|              |                      |       |       |       |
|--------------|----------------------|-------|-------|-------|
| 231465_at    | <i>NA</i>            | 2.465 | 2.325 | 2.325 |
| 229165_at    | <i>MRPL12</i>        | 2.435 | 2.295 | 2.295 |
| 206658_at    | <i>UPK3B</i>         | 2.7   | 2.54  | 2.54  |
| 223180_s_at  | <i>C18orf55</i>      | 11.7  | 10.98 | 11.06 |
| 1560615_a_at | <i>RP11-529I10.4</i> | 2.495 | 2.355 | 2.345 |
| 1563721_at   | <i>NA</i>            | 2.955 | 2.785 | 2.775 |
| 240031_at    | <i>MSRA</i>          | 2.975 | 2.805 | 2.785 |
| 222406_s_at  | <i>PNRC2</i>         | 3.275 | 3.085 | 3.065 |
| 244068_at    | <i>STS-1</i>         | 2.185 | 2.065 | 2.055 |
| 242101_at    | <i>ESR2</i>          | 3.215 | 3.035 | 3.025 |
| 204424_s_at  | <i>LMO3</i>          | 2.32  | 2.18  | 2.18  |
| 228154_at    | <i>C19orf44</i>      | 2.33  | 2.19  | 2.19  |
| 1561387_a_at | <i>FAM55A</i>        | 3.02  | 2.85  | 2.84  |
| 220208_at    | <i>ADAMTS13</i>      | 2.44  | 2.3   | 2.3   |
| 232212_at    | <i>PLEKHA8</i>       | 3.63  | 3.41  | 3.42  |
| 237147_at    | <i>RNF168</i>        | 3.285 | 3.095 | 3.085 |
| 239114_at    | <i>SERGEF</i>        | 2.885 | 2.715 | 2.725 |
| 232562_at    | <i>NA</i>            | 2.52  | 2.38  | 2.37  |
| 228504_at    | <i>NA</i>            | 3.04  | 2.87  | 2.86  |
| 227573_s_at  | <i>OBSL1</i>         | 2.585 | 2.435 | 2.425 |
| 1569496_s_at | <i>SPON2</i>         | 4.335 | 4.085 | 4.075 |
| 220053_at    | <i>GDF3</i>          | 2.83  | 2.67  | 2.66  |
| 241052_at    | <i>NA</i>            | 2.485 | 2.345 | 2.335 |
| 229716_at    | <i>NA</i>            | 2.34  | 2.2   | 2.21  |
| 220232_at    | <i>SCD5</i>          | 3.245 | 3.065 | 3.055 |
| 243891_at    | <i>LOC196463</i>     | 2.44  | 2.3   | 2.3   |
| 208107_s_at  | <i>LOC81691</i>      | 2.855 | 2.685 | 2.695 |
| 1554160_a_at | <i>ZNF446</i>        | 2.255 | 2.115 | 2.125 |
| 1565890_at   | <i>C20orf82</i>      | 2.42  | 2.28  | 2.28  |
| 232199_at    | <i>PPP1R3F</i>       | 2.1   | 1.98  | 1.98  |
| 210531_at    | <i>NR2C1</i>         | 3.12  | 2.94  | 2.94  |

|              |                  |        |        |        |
|--------------|------------------|--------|--------|--------|
| 229039_at    | <i>SYN2</i>      | 2.41   | 2.27   | 2.27   |
| 1559000_at   | <i>C10orf108</i> | 2.225  | 2.105  | 2.095  |
| 232845_at    | <i>CDH23</i>     | 2.26   | 2.13   | 2.12   |
| 203307_at    | <i>GNL1</i>      | 6.61   | 6.24   | 6.22   |
| 206814_at    | <i>NGFB</i>      | 6.07   | 5.7    | 5.73   |
| 240599_x_at  | <i>PHC3</i>      | 3.255  | 3.075  | 3.065  |
| 238273_at    | <i>SLC13A4</i>   | 2.69   | 2.54   | 2.53   |
| 221076_at    | <i>NA</i>        | 2.975  | 2.805  | 2.795  |
| 226070_at    | <i>C9orf142</i>  | 4.105  | 3.865  | 3.865  |
| 215331_at    | <i>MYH15</i>     | 2.275  | 2.135  | 2.135  |
| 222356_at    | <i>TBL1Y</i>     | 3.41   | 3.21   | 3.21   |
| 210406_s_at  | <i>RAB6C</i>     | 12.465 | 11.775 | 11.715 |
| 205683_x_at  | <i>TPSAB1</i>    | 2.28   | 2.14   | 2.14   |
| 1564568_at   | <i>ELL</i>       | 3.06   | 2.88   | 2.88   |
| 238161_at    | <i>ZNF289</i>    | 2.62   | 2.46   | 2.46   |
| 239316_at    | <i>LOC751071</i> | 3.715  | 3.495  | 3.495  |
| 222847_s_at  | <i>EGLN3</i>     | 2.72   | 2.56   | 2.56   |
| 1558698_at   | <i>ZNF264</i>    | 2.855  | 2.695  | 2.685  |
| 204211_x_at  | <i>EIF2AK2</i>   | 9.095  | 8.595  | 8.545  |
| 221547_at    | <i>PRPF18</i>    | 8.875  | 8.365  | 8.345  |
| 1565844_at   | <i>BRPF3</i>     | 2.64   | 2.48   | 2.49   |
| 240726_at    | <i>PARD3B</i>    | 3.025  | 2.855  | 2.835  |
| 227885_at    | <i>LOC400236</i> | 2.845  | 2.685  | 2.685  |
| 216876_s_at  | <i>IL17A</i>     | 2.92   | 2.76   | 2.75   |
| 221240_s_at  | <i>B3GNT4</i>    | 3.255  | 3.075  | 3.065  |
| 242292_at    | <i>DMRTC1</i>    | 2.975  | 2.805  | 2.795  |
| 216240_at    | <i>PVT1</i>      | 2.325  | 2.185  | 2.185  |
| 1564490_at   | <i>NA</i>        | 2.465  | 2.325  | 2.325  |
| 243067_at    | <i>NME1</i>      | 2.45   | 2.31   | 2.31   |
| 1556318_s_at | <i>CAND1</i>     | 3.015  | 2.835  | 2.835  |
| 231038_s_at  | <i>NA</i>        | 2.735  | 2.585  | 2.575  |

|              |                  |        |        |        |
|--------------|------------------|--------|--------|--------|
| 241751_at    | <i>OFDI</i>      | 3.025  | 2.855  | 2.845  |
| 224708_at    | <i>KIAA2013</i>  | 8.04   | 7.58   | 7.58   |
| 232864_s_at  | <i>AFF4</i>      | 3.43   | 3.23   | 3.23   |
| 230999_at    | <i>FLJ39051</i>  | 5.055  | 4.775  | 4.745  |
| 235929_s_at  | <i>NA</i>        | 3.02   | 2.84   | 2.84   |
| 217358_at    | <i>DNAJC16</i>   | 3.13   | 2.95   | 2.95   |
| 1554108_at   | <i>NA</i>        | 2.905  | 2.745  | 2.735  |
| 215686_x_at  | <i>TFAP2B</i>    | 2.895  | 2.735  | 2.725  |
| 224383_at    | <i>RNF17</i>     | 2.935  | 2.775  | 2.765  |
| 239564_at    | <i>NA</i>        | 2.82   | 2.66   | 2.66   |
| 213507_s_at  | <i>KPNB1</i>     | 12.275 | 11.545 | 11.595 |
| 1569898_a_at | <i>NA</i>        | 2.06   | 1.94   | 1.94   |
| 235382_at    | <i>FLJ90650</i>  | 2.565  | 2.425  | 2.415  |
| 228524_at    | <i>ADCK5</i>     | 2.745  | 2.585  | 2.585  |
| 238172_at    | <i>NDUFA10</i>   | 2.315  | 2.175  | 2.185  |
| 221698_s_at  | <i>CLEC7A</i>    | 2.66   | 2.5    | 2.51   |
| 1558804_at   | <i>NA</i>        | 2.84   | 2.69   | 2.67   |
| 217009_at    | <i>PGK2</i>      | 2.79   | 2.62   | 2.64   |
| 1553076_at   | <i>OFCC1</i>     | 2.76   | 2.61   | 2.59   |
| 244556_at    | <i>LCP2</i>      | 2.5    | 2.36   | 2.36   |
| 234820_at    | <i>MASIL</i>     | 2.46   | 2.32   | 2.32   |
| 1552740_at   | <i>C2orf15</i>   | 3.285  | 3.105  | 3.095  |
| 205031_at    | <i>EFNB3</i>     | 2.235  | 2.105  | 2.115  |
| 210970_s_at  | <i>IBTK</i>      | 12.84  | 12.13  | 12.07  |
| 217146_at    | <i>JRK</i>       | 2.38   | 2.24   | 2.24   |
| 1557825_at   | <i>NA</i>        | 2.08   | 1.96   | 1.96   |
| 230828_at    | <i>GRAMD2</i>    | 3.025  | 2.845  | 2.845  |
| 215624_at    | <i>TSC2</i>      | 2.275  | 2.145  | 2.135  |
| 243743_at    | <i>HECW1</i>     | 2.9    | 2.74   | 2.73   |
| 1556842_at   | <i>LOC286087</i> | 2.845  | 2.695  | 2.675  |
| 239194_at    | <i>WBSCR18</i>   | 3.13   | 2.95   | 2.95   |

|              |                    |        |        |        |
|--------------|--------------------|--------|--------|--------|
| 1561213_at   | <i>NA</i>          | 2.84   | 2.68   | 2.68   |
| 206436_at    | <i>MPPED1</i>      | 2.43   | 2.29   | 2.29   |
| 207489_at    | <i>FLJ12331</i>    | 2.43   | 2.29   | 2.29   |
| 208974_x_at  | <i>KPNB1</i>       | 12.435 | 11.765 | 11.675 |
| 40640_at     | <i>NCAPH2</i>      | 2.74   | 2.58   | 2.58   |
| 202061_s_at  | <i>SEL1L</i>       | 10.99  | 10.38  | 10.35  |
| 237932_at    | <i>NA</i>          | 3.42   | 3.22   | 3.22   |
| 1564235_at   | <i>hCG 1994895</i> | 2.315  | 2.175  | 2.185  |
| 219945_at    | <i>DDX25</i>       | 2.67   | 2.52   | 2.51   |
| 240923_at    | <i>COBLL1</i>      | 2.215  | 2.095  | 2.085  |
| 242103_at    | <i>TMEM86A</i>     | 2.605  | 2.465  | 2.455  |
| 1558402_at   | <i>NA</i>          | 3.05   | 2.88   | 2.87   |
| 241287_x_at  | <i>C4orf15</i>     | 2.635  | 2.485  | 2.475  |
| 215534_at    | <i>NA</i>          | 2.295  | 2.165  | 2.155  |
| 1558600_a_at | <i>PIP5K2B</i>     | 3.205  | 3.015  | 3.025  |
| 239645_at    | <i>CCM2</i>        | 2.34   | 2.2    | 2.2    |
| 220601_at    | <i>C16orf70</i>    | 2.73   | 2.57   | 2.57   |
| 210408_s_at  | <i>CPNE6</i>       | 2.245  | 2.125  | 2.125  |
| 211077_s_at  | <i>TLK1</i>        | 3.265  | 3.095  | 3.075  |
| 1564211_at   | <i>C14orf64</i>    | 2.835  | 2.675  | 2.675  |
| 1552368_at   | <i>CTCF</i>        | 2.955  | 2.795  | 2.785  |
| 244831_at    | <i>NA</i>          | 2.38   | 2.24   | 2.24   |
| 219046_s_at  | <i>PKNOX2</i>      | 2.915  | 2.755  | 2.755  |
| 1564962_at   | <i>ZNF92</i>       | 3.17   | 2.99   | 2.99   |
| 208929_x_at  | <i>RPL13</i>       | 12.035 | 11.325 | 11.375 |
| 1555373_at   | <i>C21orf114</i>   | 3.17   | 3      | 2.98   |
| 1560550_at   | <i>NA</i>          | 2.595  | 2.455  | 2.445  |
| 215218_s_at  | <i>WDR62</i>       | 2.665  | 2.515  | 2.505  |
| 208472_at    | <i>IKZF4</i>       | 3.385  | 3.195  | 3.185  |
| 233256_at    | <i>HIC2</i>        | 2.91   | 2.75   | 2.74   |
| 1555553_a_at | <i>SLC22A7</i>     | 2.19   | 2.07   | 2.07   |

|              |                  |        |        |        |
|--------------|------------------|--------|--------|--------|
| 227753_at    | <i>TMEM139</i>   | 2.165  | 2.045  | 2.035  |
| 227849_at    | <i>RP9</i>       | 2.445  | 2.305  | 2.305  |
| 234597_at    | <i>NA</i>        | 2.855  | 2.695  | 2.685  |
| 1565728_at   | <i>LOC284630</i> | 2.92   | 2.76   | 2.76   |
| 1560102_at   | <i>ARHGAP26</i>  | 3.085  | 2.915  | 2.895  |
| 210919_at    | <i>PHLPP</i>     | 2.965  | 2.805  | 2.795  |
| 208275_x_at  | <i>UTF1</i>      | 2.81   | 2.65   | 2.65   |
| 207735_at    | <i>RNF125</i>    | 3.035  | 2.855  | 2.855  |
| 219456_s_at  | <i>RIN3</i>      | 2.365  | 2.235  | 2.225  |
| 242095_at    | <i>FLJ45825</i>  | 2.365  | 2.225  | 2.225  |
| 1570090_at   | <i>EFHD1</i>     | 2.615  | 2.475  | 2.465  |
| 205816_at    | <i>ITGB8</i>     | 2.695  | 2.545  | 2.535  |
| 1562648_at   | <i>KIAA1212</i>  | 2.925  | 2.765  | 2.755  |
| 210961_s_at  | <i>ADRA1D</i>    | 2.54   | 2.4    | 2.4    |
| 243172_at    | <i>NA</i>        | 2.935  | 2.775  | 2.775  |
| 1556039_s_at | <i>NA</i>        | 3.17   | 3      | 2.98   |
| 236496_at    | <i>DEGS2</i>     | 2.74   | 2.58   | 2.58   |
| 239865_at    | <i>NA</i>        | 2.74   | 2.59   | 2.58   |
| 236416_at    | <i>ARHGEF7</i>   | 3.035  | 2.855  | 2.865  |
| 1562895_at   | <i>NA</i>        | 2.275  | 2.155  | 2.145  |
| 227231_at    | <i>KIAA1211</i>  | 3.095  | 2.915  | 2.925  |
| 204689_at    | <i>HHEX</i>      | 2.41   | 2.27   | 2.27   |
| 222290_at    | <i>OR2A9P</i>    | 3.045  | 2.875  | 2.865  |
| 238990_x_at  | <i>TRIM61</i>    | 6.595  | 6.215  | 6.225  |
| 230433_at    | <i>LOC729970</i> | 2.445  | 2.305  | 2.305  |
| 200017_at    | <i>RPS27A</i>    | 13.725 | 12.975 | 12.915 |
| 1565802_at   | <i>GTF2IRD2</i>  | 3.695  | 3.495  | 3.495  |
| 223741_s_at  | <i>TTYH2</i>     | 2.44   | 2.31   | 2.3    |
| 231570_at    | <i>C9orf138</i>  | 2.585  | 2.445  | 2.445  |
| 220181_x_at  | <i>SLC30A5</i>   | 4.125  | 3.885  | 3.885  |
| 214383_x_at  | <i>KLHDC3</i>    | 3.375  | 3.175  | 3.185  |

|              |                  |        |        |        |
|--------------|------------------|--------|--------|--------|
| 233332_at    | <i>LOC121952</i> | 2.42   | 2.28   | 2.28   |
| 237942_at    | <i>SNRK</i>      | 3.28   | 3.1    | 3.09   |
| 211024_s_at  | <i>TITF1</i>     | 2.85   | 2.69   | 2.69   |
| 242148_at    | <i>BCL6B</i>     | 2.92   | 2.76   | 2.76   |
| 240865_at    | <i>NA</i>        | 2.59   | 2.45   | 2.44   |
| 218475_at    | <i>HTF9C</i>     | 3.27   | 3.1    | 3.08   |
| 207640_x_at  | <i>NTN2L</i>     | 2.225  | 2.105  | 2.095  |
| 202005_at    | <i>ST14</i>      | 2.71   | 2.55   | 2.55   |
| 205721_at    | <i>GFRA2</i>     | 2.52   | 2.38   | 2.38   |
| 223740_at    | <i>C6orf59</i>   | 2.42   | 2.28   | 2.29   |
| 229260_at    | <i>C5orf15</i>   | 2.345  | 2.205  | 2.215  |
| 236189_at    | <i>ANKRD50</i>   | 2.58   | 2.44   | 2.44   |
| 234069_at    | <i>NA</i>        | 2.205  | 2.085  | 2.085  |
| 242551_at    | <i>C18orf1</i>   | 2.685  | 2.535  | 2.525  |
| 216170_at    | <i>CHCHD3</i>    | 2.41   | 2.27   | 2.27   |
| 200754_x_at  | <i>SFRS2</i>     | 11.925 | 11.295 | 11.225 |
| 1563077_at   | <i>NA</i>        | 2.83   | 2.68   | 2.66   |
| 214619_at    | <i>CRHR1</i>     | 2.45   | 2.31   | 2.31   |
| 1555107_a_at | <i>KIAA1530</i>  | 2.325  | 2.185  | 2.195  |
| 205248_at    | <i>DOPEY2</i>    | 2.46   | 2.32   | 2.32   |
| 233530_at    | <i>FKBP1A</i>    | 2.59   | 2.45   | 2.45   |
| 1557790_at   | <i>JRKL</i>      | 2.57   | 2.43   | 2.43   |
| 223977_s_at  | <i>C18orf2</i>   | 2.9    | 2.75   | 2.73   |
| 232192_at    | <i>LOC153811</i> | 2.41   | 2.27   | 2.27   |
| 244501_at    | <i>EVI5L</i>     | 2.55   | 2.41   | 2.4    |
| 209472_at    | <i>CCBL2</i>     | 9.98   | 9.44   | 9.4    |
| 206293_at    | <i>SULT2A1</i>   | 3.16   | 2.99   | 2.97   |
| 228958_at    | <i>RPL27</i>     | 2.56   | 2.42   | 2.41   |
| 1564128_at   | <i>QPRT</i>      | 2.735  | 2.585  | 2.575  |
| 205561_at    | <i>KCTD17</i>    | 2.665  | 2.525  | 2.515  |
| 236497_at    | <i>LOC729683</i> | 2.635  | 2.495  | 2.495  |

|              |                  |       |       |       |
|--------------|------------------|-------|-------|-------|
| 234468_at    | <i>NA</i>        | 2.78  | 2.62  | 2.63  |
| 231486_x_at  | <i>NHLRC2</i>    | 2.8   | 2.65  | 2.64  |
| 1554492_at   | <i>THADA</i>     | 3.105 | 2.925 | 2.925 |
| 226898_s_at  | <i>SFPQ</i>      | 2.305 | 2.175 | 2.185 |
| 1563297_s_at | <i>NA</i>        | 2.355 | 2.225 | 2.215 |
| 239921_at    | <i>tcag7.216</i> | 2.825 | 2.675 | 2.665 |
| 215014_at    | <i>NA</i>        | 3.23  | 3.04  | 3.06  |
| 224763_at    | <i>RPL37</i>     | 8.485 | 7.985 | 8.025 |
| 232079_s_at  | <i>TOMM40</i>    | 2.49  | 2.35  | 2.35  |
| 1556713_at   | <i>FANCF</i>     | 2.665 | 2.525 | 2.515 |
| 216495_x_at  | <i>IVD</i>       | 3.315 | 3.135 | 3.125 |
| 236871_s_at  | <i>IQCF3</i>     | 3.385 | 3.205 | 3.195 |
| 237513_at    | <i>TRY1</i>      | 2.42  | 2.29  | 2.28  |
| 239555_at    | <i>LYN</i>       | 2.19  | 2.07  | 2.07  |
| 210234_at    | <i>GRM4</i>      | 2.305 | 2.185 | 2.175 |
| 239196_at    | <i>ANKRD22</i>   | 2.76  | 2.6   | 2.61  |
| 241123_at    | <i>UPBI</i>      | 2.81  | 2.65  | 2.65  |
| 1567612_at   | <i>NA</i>        | 2.805 | 2.655 | 2.645 |
| 220724_at    | <i>FLJ21511</i>  | 2.81  | 2.66  | 2.64  |
| 1563878_a_at | <i>LOC338963</i> | 2.815 | 2.655 | 2.655 |
| 222320_at    | <i>CDC73</i>     | 3.27  | 3.08  | 3.1   |
| 1570412_at   | <i>MED12L</i>    | 2.555 | 2.415 | 2.415 |
| 242557_at    | <i>C6orf12</i>   | 2.795 | 2.645 | 2.635 |
| 229965_at    | <i>PIK4CA</i>    | 2.355 | 2.215 | 2.225 |
| 205837_s_at  | <i>GYP A</i>     | 3.055 | 2.895 | 2.885 |
| 233419_at    | <i>NA</i>        | 2.58  | 2.44  | 2.44  |
| 231587_at    | <i>LOC440838</i> | 2.49  | 2.36  | 2.35  |
| 227342_s_at  | <i>MYEOV</i>     | 2.365 | 2.235 | 2.225 |
| 1562214_at   | <i>LOC151171</i> | 2.015 | 1.895 | 1.895 |
| 216700_at    | <i>TRIO</i>      | 2.235 | 2.115 | 2.115 |
| 1564426_x_at | <i>LOC389634</i> | 2.805 | 2.655 | 2.645 |



|              |                 |       |       |       |
|--------------|-----------------|-------|-------|-------|
| 234477_at    | <i>IGHV2-70</i> | 2.345 | 2.215 | 2.225 |
| 1553087_at   | <i>C18orf12</i> | 2.88  | 2.73  | 2.71  |
| 217389_s_at  | <i>ATF5</i>     | 2.69  | 2.54  | 2.55  |
| 217681_at    | <i>WNT7B</i>    | 2.195 | 2.075 | 2.075 |
| 1561590_a_at | <i>BC038740</i> | 2.685 | 2.545 | 2.535 |
| 219574_at    | <i>l-Mar</i>    | 2.645 | 2.505 | 2.495 |
| 1561834_a_at | <i>FLNB</i>     | 2.23  | 2.11  | 2.11  |
| 234602_x_at  | <i>NA</i>       | 2.99  | 2.83  | 2.82  |
| 218925_s_at  | <i>C11orf1</i>  | 3.05  | 2.89  | 2.88  |
| 1560738_at   | <i>UBE3C</i>    | 3.115 | 2.945 | 2.935 |
| 233095_at    | <i>NA</i>       | 2.725 | 2.575 | 2.565 |
| 216994_s_at  | <i>RUNX2</i>    | 2.305 | 2.185 | 2.185 |
| 202463_s_at  | <i>MBD3</i>     | 4.49  | 4.26  | 4.23  |
| 217758_s_at  | <i>TM9SF3</i>   | 13.12 | 12.38 | 12.42 |
| 1570338_at   | <i>D2HGDH</i>   | 2.675 | 2.525 | 2.535 |
| 215751_at    | <i>RBM26</i>    | 2.715 | 2.565 | 2.575 |
| 234060_at    | <i>NA</i>       | 2.57  | 2.43  | 2.43  |
| 207126_x_at  | <i>UGT1A1</i>   | 2.56  | 2.42  | 2.42  |
| 210068_s_at  | <i>AQP4</i>     | 2.375 | 2.245 | 2.235 |
| 237356_at    | <i>ADAMTS18</i> | 2.445 | 2.315 | 2.305 |
| 1559642_a_at | <i>C10orf56</i> | 2.875 | 2.715 | 2.715 |
| 239795_at    | <i>AXIN1</i>    | 2.88  | 2.72  | 2.72  |
| 243413_at    | <i>TTC30B</i>   | 3.19  | 3.01  | 3.02  |
| 215583_at    | <i>TMEM63A</i>  | 4.58  | 4.32  | 4.33  |
| 229712_at    | <i>SNAPC3</i>   | 2.91  | 2.75  | 2.76  |
| 1561871_at   | <i>NA</i>       | 2.275 | 2.155 | 2.155 |
| 240804_at    | <i>GPR39</i>    | 2.735 | 2.575 | 2.585 |
| 232672_x_at  | <i>MYEF2</i>    | 2.55  | 2.42  | 2.4   |
| 218744_s_at  | <i>PACSN3</i>   | 2.695 | 2.555 | 2.545 |
| 232327_at    | <i>THSD7B</i>   | 2.77  | 2.61  | 2.62  |
| 1556354_s_at | <i>EPOR</i>     | 2.85  | 2.69  | 2.69  |

|              |                  |        |        |        |
|--------------|------------------|--------|--------|--------|
| 1555925_at   | <i>NA</i>        | 2.95   | 2.8    | 2.78   |
| 1566932_x_at | <i>TFB2M</i>     | 2.47   | 2.33   | 2.34   |
| 214950_at    | <i>IL9R</i>      | 2.58   | 2.44   | 2.44   |
| 240930_at    | <i>CRAMP1L</i>   | 2.385  | 2.255  | 2.245  |
| 231204_at    | <i>C4orf21</i>   | 3.075  | 2.915  | 2.905  |
| 244129_at    | <i>NA</i>        | 2.335  | 2.205  | 2.215  |
| 1560683_at   | <i>BCL8</i>      | 3.18   | 3.01   | 3      |
| 240720_at    | <i>NA</i>        | 3.29   | 3.1    | 3.12   |
| 1568919_at   | <i>NA</i>        | 2.67   | 2.53   | 2.52   |
| 209976_s_at  | <i>CYP2E1</i>    | 2.695  | 2.545  | 2.555  |
| 227931_at    | <i>NA</i>        | 10.045 | 9.505  | 9.495  |
| 243898_at    | <i>RHBDD1</i>    | 2.705  | 2.565  | 2.555  |
| 241101_at    | <i>NA</i>        | 2.44   | 2.31   | 2.3    |
| 241469_at    | <i>SEC63D1</i>   | 2.795  | 2.635  | 2.635  |
| 239963_at    | <i>NA</i>        | 3.175  | 2.995  | 3.005  |
| 223456_s_at  | <i>TCHP</i>      | 3.155  | 2.975  | 2.985  |
| 1558930_at   | <i>LOC728192</i> | 2.455  | 2.315  | 2.315  |
| 1566251_at   | <i>SH3GLP1</i>   | 3.455  | 3.275  | 3.265  |
| 230506_at    | <i>C6orf164</i>  | 2.82   | 2.67   | 2.66   |
| 218630_at    | <i>MKSI</i>      | 2.365  | 2.235  | 2.245  |
| 212783_at    | <i>RBBP6</i>     | 9.015  | 8.515  | 8.525  |
| 221767_x_at  | <i>HDLBP</i>     | 12.735 | 12.075 | 12.005 |
| 236783_at    | <i>KCNIP4</i>    | 2.63   | 2.49   | 2.48   |
| 232850_at    | <i>DCDC2</i>     | 2.57   | 2.43   | 2.43   |
| 207708_at    | <i>ALOXE3</i>    | 2.235  | 2.115  | 2.115  |
| 215353_at    | <i>ABPI</i>      | 2.865  | 2.715  | 2.695  |
| 227637_at    | <i>TFCP2</i>     | 7.61   | 7.21   | 7.18   |
| 210491_at    | <i>NA</i>        | 3.39   | 3.2    | 3.21   |
| 213801_x_at  | <i>RPSA</i>      | 14.135 | 13.405 | 13.335 |
| 1566935_at   | <i>TYRO3P</i>    | 2.665  | 2.525  | 2.515  |
| 236589_at    | <i>NA</i>        | 2.89   | 2.74   | 2.73   |

|              |                  |        |        |        |
|--------------|------------------|--------|--------|--------|
| 1570326_at   | <i>NA</i>        | 2.495  | 2.355  | 2.355  |
| 206154_at    | <i>RLBP1</i>     | 2.145  | 2.025  | 2.025  |
| 219101_x_at  | <i>ABHD8</i>     | 2.61   | 2.47   | 2.47   |
| 223549_s_at  | <i>ESPN</i>      | 2.395  | 2.265  | 2.275  |
| 1557085_at   | <i>PLAC1L</i>    | 2.795  | 2.645  | 2.635  |
| 1556400_at   | <i>NA</i>        | 2.605  | 2.465  | 2.465  |
| 219943_s_at  | <i>FLJ11850</i>  | 2.545  | 2.405  | 2.405  |
| 202072_at    | <i>HNRPL</i>     | 2.765  | 2.615  | 2.625  |
| 220527_at    | <i>MRPL20</i>    | 2.475  | 2.335  | 2.345  |
| 207684_at    | <i>TBX6</i>      | 2.435  | 2.295  | 2.305  |
| 227056_at    | <i>KIAA0141</i>  | 9.17   | 8.68   | 8.67   |
| 209813_x_at  | <i>TRGV9</i>     | 2.325  | 2.205  | 2.205  |
| 207314_x_at  | <i>KIR3DL2</i>   | 2.32   | 2.2    | 2.2    |
| 234994_at    | <i>KIAA1913</i>  | 13.095 | 12.365 | 12.425 |
| 239941_at    | <i>NA</i>        | 2.6    | 2.46   | 2.46   |
| 1554016_a_at | <i>C16orf57</i>  | 5.345  | 5.045  | 5.075  |
| 219086_at    | <i>C14orf131</i> | 2.845  | 2.695  | 2.685  |
| 230311_s_at  | <i>PRDM6</i>     | 2.15   | 2.04   | 2.03   |
| 244385_at    | <i>JMJD2C</i>    | 3.075  | 2.915  | 2.905  |
| 243881_at    | <i>NA</i>        | 2.495  | 2.365  | 2.355  |
| 211056_s_at  | <i>SRD5A1</i>    | 7.715  | 7.285  | 7.305  |
| 206779_s_at  | <i>ASMT</i>      | 2.9    | 2.74   | 2.74   |
| 204030_s_at  | <i>SCHIP1</i>    | 11.605 | 10.955 | 11.005 |
| 207475_at    | <i>FABP2</i>     | 3.39   | 3.21   | 3.21   |
| 244191_at    | <i>RPLP1</i>     | 2.475  | 2.345  | 2.335  |
| 217900_at    | <i>IARS2</i>     | 9.98   | 9.46   | 9.43   |
| 218731_s_at  | <i>VWAI</i>      | 2.48   | 2.35   | 2.34   |
| 1569915_at   | <i>NA</i>        | 2.48   | 2.34   | 2.35   |
| 244538_at    | <i>KCTD19</i>    | 2.565  | 2.435  | 2.425  |
| 229866_at    | <i>NA</i>        | 3.36   | 3.18   | 3.18   |
| 231585_at    | <i>VPSI3A</i>    | 3.845  | 3.635  | 3.655  |

|              |                  |       |       |       |
|--------------|------------------|-------|-------|-------|
| 230218_at    | <i>NA</i>        | 2.69  | 2.55  | 2.55  |
| 216305_s_at  | <i>C2orf3</i>    | 4.305 | 4.075 | 4.065 |
| 1553174_at   | <i>JPH2</i>      | 2.105 | 1.985 | 1.985 |
| 211599_x_at  | <i>MET</i>       | 2.175 | 2.055 | 2.055 |
| 1561514_at   | <i>LOC400655</i> | 2.65  | 2.5   | 2.51  |
| 222169_x_at  | <i>SH2D3A</i>    | 3.045 | 2.885 | 2.875 |
| 239318_at    | <i>FAM118B</i>   | 2.25  | 2.13  | 2.13  |
| 218179_s_at  | <i>FLJ12716</i>  | 8.24  | 7.8   | 7.8   |
| 1552588_a_at | <i>CNBD1</i>     | 2.57  | 2.44  | 2.43  |
| 210587_at    | <i>INHBE</i>     | 2.58  | 2.44  | 2.44  |
| 1566480_x_at | <i>FLJ35848</i>  | 4.225 | 3.995 | 4.015 |
| 231938_at    | <i>SGOL1</i>     | 3.135 | 2.965 | 2.975 |
| 200846_s_at  | <i>PPP1CA</i>    | 6.945 | 6.565 | 6.575 |
| 211386_at    | <i>MGC12488</i>  | 3.29  | 3.11  | 3.12  |
| 1559044_at   | <i>EXOSC1</i>    | 3.075 | 2.915 | 2.915 |
| 202793_at    | <i>MBOAT5</i>    | 5.22  | 4.95  | 4.94  |
| 211217_s_at  | <i>KCNQ1</i>     | 2.72  | 2.58  | 2.58  |
| 211160_x_at  | <i>ACTN1</i>     | 7.765 | 7.325 | 7.375 |
| 204846_at    | <i>CP</i>        | 2.445 | 2.305 | 2.315 |
| 243458_at    | <i>TNFAIP8</i>   | 3.34  | 3.15  | 3.17  |
| 233538_s_at  | <i>CYBB</i>      | 2.295 | 2.175 | 2.175 |
| 217497_at    | <i>ECGF1</i>     | 4.14  | 3.92  | 3.92  |
| 1569954_at   | <i>C10orf112</i> | 2.98  | 2.83  | 2.81  |
| 237627_at    | <i>NA</i>        | 3.115 | 2.955 | 2.955 |
| 231580_at    | <i>LOC729464</i> | 2.61  | 2.47  | 2.47  |
| 237406_at    | <i>NEK6</i>      | 2.475 | 2.345 | 2.335 |
| 202585_s_at  | <i>NFX1</i>      | 3.64  | 3.45  | 3.44  |
| 220676_at    | <i>ADAMTS8</i>   | 2.845 | 2.685 | 2.695 |
| 232355_at    | <i>NA</i>        | 5.825 | 5.505 | 5.535 |
| 239407_at    | <i>C21orf66</i>  | 2.37  | 2.25  | 2.25  |
| 216263_s_at  | <i>NGDN</i>      | 2.915 | 2.755 | 2.765 |

|              |                   |       |       |       |
|--------------|-------------------|-------|-------|-------|
| 243886_at    | <i>LOC130355</i>  | 2.94  | 2.79  | 2.78  |
| 236677_at    | <i>NGB</i>        | 2.355 | 2.235 | 2.235 |
| 1553169_at   | <i>C20orf75</i>   | 2.205 | 2.085 | 2.085 |
| 241373_at    | <i>ARIH2</i>      | 6.38  | 6.05  | 6.03  |
| 227625_s_at  | <i>STUB1</i>      | 9.47  | 8.97  | 8.97  |
| 1555852_at   | <i>PSMB9</i>      | 2.56  | 2.42  | 2.42  |
| 1563482_at   | <i>DPYSL2</i>     | 2.64  | 2.5   | 2.5   |
| 240642_at    | <i>NA</i>         | 2.32  | 2.2   | 2.2   |
| 230062_at    | <i>KIAA1666</i>   | 2.775 | 2.635 | 2.625 |
| 220262_s_at  | <i>EGFL9</i>      | 2.33  | 2.21  | 2.21  |
| 243137_at    | <i>NA</i>         | 2.745 | 2.605 | 2.605 |
| 241723_at    | <i>IQGAP2</i>     | 2.855 | 2.695 | 2.705 |
| 1562439_at   | <i>NCOA3</i>      | 2.575 | 2.435 | 2.435 |
| 222068_s_at  | <i>LRRC50</i>     | 2.415 | 2.285 | 2.295 |
| 220565_at    | <i>CCR10</i>      | 2.64  | 2.5   | 2.5   |
| 203400_s_at  | <i>TF</i>         | 2.465 | 2.335 | 2.325 |
| 220907_at    | <i>GPR110</i>     | 2.72  | 2.58  | 2.57  |
| 1562282_at   | <i>ZNF568</i>     | 3.675 | 3.485 | 3.465 |
| 1564707_x_at | <i>GLS2</i>       | 2.515 | 2.385 | 2.375 |
| 220771_at    | <i>LOC51152</i>   | 3.175 | 3.015 | 3.005 |
| 235555_at    | <i>NA</i>         | 2.98  | 2.83  | 2.82  |
| 232807_at    | <i>C3orf40</i>    | 2.175 | 2.065 | 2.055 |
| 204207_s_at  | <i>RNGTT</i>      | 5.905 | 5.605 | 5.575 |
| 1559641_at   | <i>C10orf56</i>   | 2.69  | 2.55  | 2.55  |
| 233793_at    | <i>ST6GALNAC5</i> | 2.955 | 2.795 | 2.795 |
| 1556770_a_at | <i>FBXL13</i>     | 2.65  | 2.51  | 2.51  |
| 205645_at    | <i>REPS2</i>      | 2.405 | 2.285 | 2.275 |
| 227772_at    | <i>NA</i>         | 9.57  | 9.05  | 9.08  |
| 211736_at    | <i>SP2</i>        | 2.65  | 2.51  | 2.51  |
| 1557309_at   | <i>DENND1B</i>    | 2.99  | 2.84  | 2.83  |
| 241998_at    | <i>LOC389073</i>  | 2.31  | 2.19  | 2.19  |

|              |                  |        |        |        |
|--------------|------------------|--------|--------|--------|
| 1557017_at   | <i>NA</i>        | 3.005  | 2.855  | 2.835  |
| 227400_at    | <i>NFIX</i>      | 6.195  | 5.875  | 5.875  |
| 210403_s_at  | <i>KCNJI</i>     | 2.26   | 2.14   | 2.14   |
| 204550_x_at  | <i>GSTM1</i>     | 4.325  | 4.105  | 4.105  |
| 243862_at    | <i>NA</i>        | 3.41   | 3.24   | 3.22   |
| 208080_at    | <i>AURKA</i>     | 2.74   | 2.6    | 2.6    |
| 1562926_at   | <i>NA</i>        | 2.73   | 2.59   | 2.59   |
| 1552865_a_at | <i>IFLTD1</i>    | 2.115  | 2.005  | 1.995  |
| 237418_at    | <i>CDK5RAP2</i>  | 2.045  | 1.945  | 1.945  |
| 221142_s_at  | <i>PECR</i>      | 2.515  | 2.375  | 2.375  |
| 234569_at    | <i>NA</i>        | 2.4    | 2.28   | 2.27   |
| 233534_at    | <i>KRTAP3-2</i>  | 3.07   | 2.91   | 2.91   |
| 35974_at     | <i>LRMP</i>      | 2.78   | 2.63   | 2.64   |
| 243204_at    | <i>NA</i>        | 3.04   | 2.88   | 2.88   |
| 203107_x_at  | <i>RPS2</i>      | 13.505 | 12.795 | 12.805 |
| 206350_at    | <i>APCS</i>      | 2.61   | 2.48   | 2.47   |
| 1553265_at   | <i>SLC23A3</i>   | 2.81   | 2.67   | 2.67   |
| 244681_at    | <i>C3orf46</i>   | 2.63   | 2.49   | 2.49   |
| 216759_at    | <i>HRASLS2</i>   | 2.84   | 2.7    | 2.69   |
| 1554203_at   | <i>C21orf9</i>   | 2.98   | 2.83   | 2.82   |
| 207080_s_at  | <i>PYY</i>       | 2.34   | 2.22   | 2.22   |
| 228705_at    | <i>CAPN12</i>    | 2.78   | 2.63   | 2.64   |
| 216386_at    | <i>LOC220077</i> | 2.415  | 2.295  | 2.285  |
| 242889_x_at  | <i>LOC645431</i> | 5.79   | 5.49   | 5.48   |
| 244468_at    | <i>PDZK1</i>     | 2.805  | 2.665  | 2.655  |
| 206334_at    | <i>LIPF</i>      | 2.595  | 2.455  | 2.455  |
| 230117_at    | <i>VSTM2</i>     | 2.505  | 2.375  | 2.365  |
| 1555996_s_at | <i>EIF4A2</i>    | 2.485  | 2.355  | 2.365  |
| 1558292_s_at | <i>PIGW</i>      | 9.795  | 9.275  | 9.285  |
| 244747_at    | <i>NPNT</i>      | 2.29   | 2.17   | 2.17   |
| 1562528_at   | <i>RORA</i>      | 3.06   | 2.89   | 2.91   |

|              |                  |        |        |        |
|--------------|------------------|--------|--------|--------|
| 228055_at    | <i>NAPSB</i>     | 2.125  | 2.015  | 2.005  |
| 1564887_at   | <i>NA</i>        | 2.74   | 2.6    | 2.59   |
| 227209_at    | <i>CNTNI</i>     | 3.08   | 2.92   | 2.92   |
| 214123_s_at  | <i>NOL14</i>     | 2.96   | 2.8    | 2.81   |
| 1565820_x_at | <i>PHACTR4</i>   | 2.805  | 2.665  | 2.655  |
| 201240_s_at  | <i>SPCS2</i>     | 14.285 | 13.535 | 13.555 |
| 225741_at    | <i>THUMPD3</i>   | 6.88   | 6.5    | 6.54   |
| 1569486_at   | <i>NA</i>        | 2.545  | 2.415  | 2.405  |
| 1562583_s_at | <i>LOC646405</i> | 3.07   | 2.91   | 2.91   |
| 220828_s_at  | <i>FLJ11292</i>  | 3.07   | 2.91   | 2.91   |
| 207879_at    | <i>NA</i>        | 2.905  | 2.755  | 2.745  |
| 241326_at    | <i>PAPOLA</i>    | 2.555  | 2.415  | 2.415  |
| 206906_at    | <i>ICAM5</i>     | 2.095  | 1.995  | 1.995  |
| 1566739_at   | <i>PLCE1</i>     | 2.745  | 2.605  | 2.605  |
| 1561206_at   | <i>KLHL8</i>     | 3      | 2.84   | 2.84   |
| 207743_at    | <i>PRO1880</i>   | 2.32   | 2.2    | 2.2    |
| 1561995_at   | <i>NA</i>        | 2.105  | 1.995  | 2.005  |
| 1561894_at   | <i>LOC653739</i> | 2.82   | 2.68   | 2.67   |
| 1565774_at   | <i>FAM38B</i>    | 2.47   | 2.35   | 2.34   |
| 230007_at    | <i>JMJDIC</i>    | 3.12   | 2.96   | 2.96   |
| 1554786_at   | <i>C20orf32</i>  | 2.745  | 2.605  | 2.605  |
| 233362_at    | <i>ZNF341</i>    | 2.585  | 2.445  | 2.445  |
| 228934_x_at  | <i>NA</i>        | 5.77   | 5.46   | 5.48   |
| 1556516_at   | <i>C9orf93</i>   | 2.785  | 2.635  | 2.645  |
| 210128_s_at  | <i>LTB4R</i>     | 2.78   | 2.63   | 2.64   |
| 209749_s_at  | <i>ACE</i>       | 2.935  | 2.785  | 2.775  |
| 1569554_at   | <i>ESR2</i>      | 2.81   | 2.67   | 2.66   |
| 227933_at    | <i>LINGO1</i>    | 3.585  | 3.405  | 3.405  |
| 235189_at    | <i>NARG2</i>     | 2.455  | 2.335  | 2.335  |
| 230358_at    | <i>ZER1</i>      | 2.44   | 2.32   | 2.32   |
| 1561153_at   | <i>CCDC134</i>   | 2.68   | 2.54   | 2.54   |

|              |                  |        |        |        |
|--------------|------------------|--------|--------|--------|
| 212137_at    | <i>LARPI</i>     | 11.88  | 11.29  | 11.24  |
| 201530_x_at  | <i>EIF4A1</i>    | 12.075 | 11.425 | 11.475 |
| 1553721_at   | <i>RNF152</i>    | 2.925  | 2.775  | 2.765  |
| 216500_at    | <i>NA</i>        | 5.165  | 4.905  | 4.895  |
| 218465_at    | <i>TMEM33</i>    | 10.945 | 10.385 | 10.385 |
| 233368_s_at  | <i>RBJ</i>       | 2.485  | 2.365  | 2.355  |
| 216363_at    | <i>NA</i>        | 2.895  | 2.755  | 2.745  |
| 222828_at    | <i>IL20RA</i>    | 2.79   | 2.65   | 2.65   |
| 1563061_at   | <i>NA</i>        | 3.09   | 2.94   | 2.92   |
| 228682_at    | <i>ENOPH1</i>    | 2.68   | 2.54   | 2.54   |
| 203780_at    | <i>EVAI</i>      | 2.935  | 2.775  | 2.785  |
| 236245_at    | <i>ODF3L1</i>    | 2.39   | 2.27   | 2.27   |
| 1570127_at   | <i>NA</i>        | 2.825  | 2.685  | 2.685  |
| 235347_at    | <i>LRCH3</i>     | 8.375  | 7.945  | 7.935  |
| 1568782_at   | <i>RP2</i>       | 2.3    | 2.18   | 2.18   |
| 1555221_at   | <i>NA</i>        | 2.155  | 2.045  | 2.035  |
| 1552674_at   | <i>DIRC1</i>     | 3.05   | 2.9    | 2.89   |
| 206160_at    | <i>APOBEC2</i>   | 2.895  | 2.755  | 2.745  |
| 1562811_at   | <i>NA</i>        | 2.33   | 2.21   | 2.21   |
| 210379_s_at  | <i>TLK1</i>      | 3.065  | 2.905  | 2.905  |
| 217236_x_at  | <i>IGHG1</i>     | 2.455  | 2.335  | 2.335  |
| 213669_at    | <i>FCHO1</i>     | 2.4    | 2.28   | 2.28   |
| 237578_at    | <i>FLJ21963</i>  | 2.69   | 2.55   | 2.55   |
| 1557480_a_at | <i>DYSFIP1</i>   | 2.86   | 2.71   | 2.72   |
| 238603_at    | <i>LOC254559</i> | 2.475  | 2.355  | 2.345  |
| 212223_at    | <i>IDS</i>       | 8.275  | 7.855  | 7.845  |
| 1569892_at   | <i>NA</i>        | 2.77   | 2.64   | 2.62   |
| 1552938_at   | <i>ZIC5</i>      | 2.835  | 2.695  | 2.695  |
| 1565852_at   | <i>MBP</i>       | 2.515  | 2.395  | 2.385  |
| 1568871_at   | <i>NA</i>        | 2.975  | 2.825  | 2.815  |
| 231212_x_at  | <i>TPST1</i>     | 4.205  | 3.985  | 3.985  |



|              |                  |        |        |        |
|--------------|------------------|--------|--------|--------|
| 233474_at    | <i>LOC284240</i> | 2.35   | 2.23   | 2.23   |
| 225997_at    | <i>MOBKLI1A</i>  | 12.295 | 11.655 | 11.685 |
| 1565921_a_at | <i>NA</i>        | 2.525  | 2.405  | 2.395  |
| 227583_at    | <i>POP4</i>      | 2.69   | 2.56   | 2.55   |
| 207837_at    | <i>RBPMS</i>     | 3.5    | 3.32   | 3.32   |
| 237179_at    | <i>PCMTD2</i>    | 2.955  | 2.805  | 2.795  |
| 234914_at    | <i>ZNF7</i>      | 2.97   | 2.82   | 2.81   |
| 1553619_a_at | <i>TRIM43</i>    | 2.485  | 2.355  | 2.365  |
| 221137_at    | <i>NA</i>        | 2.61   | 2.47   | 2.47   |
| 237085_x_at  | <i>NA</i>        | 4.67   | 4.44   | 4.42   |
| 1554161_at   | <i>SLC25A27</i>  | 2.945  | 2.795  | 2.785  |
| 240988_x_at  | <i>NA</i>        | 2.415  | 2.295  | 2.295  |
| 243465_at    | <i>TMEM140</i>   | 5.385  | 5.095  | 5.115  |
| 210033_s_at  | <i>SPAG6</i>     | 2.285  | 2.165  | 2.165  |
| 211848_s_at  | <i>CEACAM7</i>   | 2.67   | 2.54   | 2.53   |
| 229147_at    | <i>NA</i>        | 2.655  | 2.525  | 2.515  |
| 231761_at    | <i>FFARI</i>     | 2.505  | 2.385  | 2.375  |
| 236064_at    | <i>SLC25A35</i>  | 3.575  | 3.395  | 3.395  |
| 217193_x_at  | <i>IL8</i>       | 2.89   | 2.75   | 2.74   |
| 1553625_at   | <i>FAM98B</i>    | 3.365  | 3.185  | 3.195  |
| 229343_at    | <i>GTSE1</i>     | 2.27   | 2.15   | 2.15   |
| 220944_at    | <i>PGLYRP4</i>   | 2.105  | 2.005  | 2.005  |
| 242298_x_at  | <i>KARS</i>      | 3.105  | 2.945  | 2.945  |
| 1561297_at   | <i>WARS2</i>     | 2.25   | 2.13   | 2.13   |
| 230716_at    | <i>LOC285733</i> | 2.615  | 2.485  | 2.475  |
| 221163_s_at  | <i>MLXIPL</i>    | 2.995  | 2.835  | 2.845  |
| 233780_at    | <i>RIF1</i>      | 2.61   | 2.48   | 2.47   |
| 207832_at    | <i>BAIAP2</i>    | 2.34   | 2.22   | 2.22   |
| 243821_at    | <i>MRPS31</i>    | 2.7    | 2.56   | 2.56   |
| 1569539_at   | <i>FILIP1L</i>   | 3.12   | 2.96   | 2.96   |
| 1560690_at   | <i>NA</i>        | 2.35   | 2.23   | 2.23   |

|              |                  |       |       |       |
|--------------|------------------|-------|-------|-------|
| 241673_x_at  | <i>NA</i>        | 2.885 | 2.745 | 2.735 |
| 1560773_at   | <i>LOC645256</i> | 2.515 | 2.395 | 2.395 |
| 236285_at    | <i>NA</i>        | 2.42  | 2.29  | 2.3   |
| 229857_s_at  | <i>KIAA1267</i>  | 2.575 | 2.445 | 2.435 |
| 1558398_at   | <i>ANKRD24</i>   | 2.37  | 2.25  | 2.25  |
| 206057_x_at  | <i>SPN</i>       | 2.265 | 2.145 | 2.145 |
| 203382_s_at  | <i>APOE</i>      | 2.39  | 2.27  | 2.27  |
| 239523_at    | <i>TUSC5</i>     | 2.925 | 2.785 | 2.775 |
| 220846_s_at  | <i>PRKCZ</i>     | 2.255 | 2.135 | 2.145 |
| 239353_at    | <i>NA</i>        | 2.43  | 2.31  | 2.31  |
| 227136_s_at  | <i>C10orf46</i>  | 2.675 | 2.535 | 2.535 |
| 217890_s_at  | <i>PARVA</i>     | 10.6  | 10.07 | 10.05 |
| 38157_at     | <i>DOM3Z</i>     | 3.84  | 3.65  | 3.64  |
| 1552952_at   | <i>RBMY2FP</i>   | 2.425 | 2.305 | 2.295 |
| 1555725_a_at | <i>RGS5</i>      | 2.84  | 2.7   | 2.7   |
| 1555116_s_at | <i>SLC11A1</i>   | 2.575 | 2.445 | 2.435 |
| 238283_at    | <i>LOC151658</i> | 2.77  | 2.63  | 2.63  |
| 235475_at    | <i>SERP1</i>     | 2.595 | 2.455 | 2.465 |
| 215290_at    | <i>LOC645323</i> | 2.8   | 2.66  | 2.66  |
| 210954_s_at  | <i>TSC22D2</i>   | 2.41  | 2.29  | 2.29  |
| 222241_at    | <i>FAM125B</i>   | 2.78  | 2.64  | 2.64  |
| 240953_at    | <i>ACPP</i>      | 2.535 | 2.415 | 2.405 |
| 230340_s_at  | <i>WASL</i>      | 2.515 | 2.395 | 2.385 |
| 234430_at    | <i>ANTXR1</i>    | 2.4   | 2.28  | 2.28  |
| 214762_at    | <i>ATP6V1G2</i>  | 2.415 | 2.295 | 2.295 |
| 230682_x_at  | <i>ABCC3</i>     | 2.47  | 2.35  | 2.35  |
| 1570357_at   | <i>STX8</i>      | 2.555 | 2.435 | 2.435 |
| 234973_at    | <i>SLC38A5</i>   | 3.465 | 3.285 | 3.285 |
| 1563187_at   | <i>KCNH7</i>     | 3.03  | 2.88  | 2.87  |
| 1558518_at   | <i>MAP3K7IP3</i> | 2.77  | 2.63  | 2.63  |
| 236895_at    | <i>SGPL1</i>     | 2.425 | 2.305 | 2.305 |

|             |                  |       |       |       |
|-------------|------------------|-------|-------|-------|
| 204557_s_at | <i>DZIP1</i>     | 8.44  | 8.01  | 8.03  |
| 1564319_at  | <i>CI9orf16</i>  | 2.625 | 2.495 | 2.485 |
| 231329_at   | <i>ITPR1</i>     | 3.04  | 2.89  | 2.88  |
| 1569955_at  | <i>NA</i>        | 2.43  | 2.31  | 2.31  |
| 211374_x_at | <i>NA</i>        | 3.895 | 3.695 | 3.695 |
| 240477_at   | <i>ETV1</i>      | 3.07  | 2.91  | 2.91  |
| 1562051_at  | <i>LOC284757</i> | 2.77  | 2.63  | 2.63  |
| 233653_at   | <i>NRG3</i>      | 2.83  | 2.69  | 2.69  |
| 224074_at   | <i>VSY1</i>      | 2.605 | 2.475 | 2.465 |
| 236541_at   | <i>NA</i>        | 2.47  | 2.35  | 2.35  |
| 231191_at   | <i>ANKMY1</i>    | 2.46  | 2.34  | 2.33  |
| 234531_at   | <i>FLJ11292</i>  | 3.025 | 2.875 | 2.865 |
| 210784_x_at | <i>LILRB3</i>    | 5.345 | 5.085 | 5.075 |
| 244306_at   | <i>NRG3</i>      | 2.625 | 2.495 | 2.485 |
| 236188_s_at | <i>NAP1L4</i>    | 2.69  | 2.55  | 2.55  |
| 221980_at   | <i>EMILIN2</i>   | 2.665 | 2.525 | 2.535 |
| 1564776_at  | <i>LENG10</i>    | 2.645 | 2.505 | 2.505 |
| 212207_at   | <i>THRAP2</i>    | 9.435 | 8.955 | 8.965 |
| 222091_at   | <i>HPCAL4</i>    | 3.485 | 3.305 | 3.315 |
| 217036_at   | <i>NA</i>        | 2.955 | 2.815 | 2.815 |
| 223275_at   | <i>PRMT6</i>     | 5.355 | 5.105 | 5.075 |
| 1561175_at  | <i>LOC283482</i> | 2.53  | 2.41  | 2.41  |
| 35160_at    | <i>LDB1</i>      | 2.975 | 2.825 | 2.835 |
| 244147_at   | <i>KIAA1217</i>  | 2.81  | 2.67  | 2.67  |
| 234503_at   | <i>CHCHD3</i>    | 2.915 | 2.775 | 2.765 |
| 243250_at   | <i>ZDHHC13</i>   | 2.915 | 2.775 | 2.765 |
| 212934_at   | <i>LOC137886</i> | 7.13  | 6.78  | 6.77  |
| 204144_s_at | <i>PIGQ</i>      | 2.8   | 2.66  | 2.66  |
| 240001_at   | <i>NA</i>        | 2.29  | 2.17  | 2.17  |
| 216968_at   | <i>MASP2</i>     | 2.575 | 2.445 | 2.455 |
| 214471_x_at | <i>LHB</i>       | 2.505 | 2.385 | 2.375 |

|              |                  |        |        |        |
|--------------|------------------|--------|--------|--------|
| 232318_s_at  | <i>LOC121838</i> | 2.775  | 2.625  | 2.645  |
| 1559895_x_at | <i>NA</i>        | 3.1    | 2.95   | 2.94   |
| 239899_at    | <i>FLJ31951</i>  | 2.145  | 2.045  | 2.035  |
| 208020_s_at  | <i>CACNA1C</i>   | 2.435  | 2.315  | 2.315  |
| 231520_at    | <i>SLC35F3</i>   | 2.44   | 2.32   | 2.32   |
| 1569779_at   | <i>MICA</i>      | 2.73   | 2.59   | 2.59   |
| 241559_at    | <i>TCEA1</i>     | 2.945  | 2.805  | 2.805  |
| 202614_at    | <i>SLC30A9</i>   | 11.395 | 10.815 | 10.855 |
| 237525_at    | <i>NA</i>        | 2.635  | 2.495  | 2.495  |
| 216887_s_at  | <i>LDB3</i>      | 2.41   | 2.29   | 2.29   |
| 1555307_at   | <i>TTF2</i>      | 2.72   | 2.59   | 2.58   |
| 219630_at    | <i>PDZK1IP1</i>  | 2.24   | 2.13   | 2.12   |
| 210496_at    | <i>NAG18</i>     | 3.25   | 3.09   | 3.09   |
| 219541_at    | <i>LIME1</i>     | 4.795  | 4.545  | 4.565  |
| 205469_s_at  | <i>IRF5</i>      | 2.305  | 2.185  | 2.185  |
| 1561856_at   | <i>NA</i>        | 2.86   | 2.72   | 2.72   |
| 1563003_at   | <i>ITGAX</i>     | 2.925  | 2.785  | 2.775  |
| 237289_at    | <i>FAM119A</i>   | 9.045  | 8.615  | 8.585  |
| 233863_at    | <i>NA</i>        | 2.33   | 2.21   | 2.21   |
| 1568660_a_at | <i>NA</i>        | 2.705  | 2.575  | 2.565  |
| 1569525_s_at | <i>NA</i>        | 3.195  | 3.035  | 3.035  |
| 242047_at    | <i>PLEKHK1</i>   | 2.59   | 2.47   | 2.47   |
| 1567297_at   | <i>OR13C4</i>    | 2.615  | 2.495  | 2.485  |
| 234456_at    | <i>TRAPPC4</i>   | 2.155  | 2.055  | 2.055  |
| 238095_at    | <i>GATA5</i>     | 2.725  | 2.595  | 2.585  |
| 1569504_at   | <i>LILRB1</i>    | 2.79   | 2.65   | 2.65   |
| 243065_at    | <i>PSITP4</i>    | 2.665  | 2.535  | 2.525  |
| 239750_x_at  | <i>VAPA</i>      | 3.74   | 3.55   | 3.57   |
| 222081_at    | <i>NA</i>        | 2.255  | 2.145  | 2.135  |
| 1553607_at   | <i>C21orf109</i> | 3.065  | 2.905  | 2.915  |
| 236357_at    | <i>NA</i>        | 2.305  | 2.185  | 2.185  |

|              |                  |        |       |       |
|--------------|------------------|--------|-------|-------|
| 1570299_at   | <i>MAML2</i>     | 2.5    | 2.38  | 2.37  |
| 1561966_at   | <i>NA</i>        | 2.36   | 2.24  | 2.24  |
| 241216_at    | <i>KIF1B</i>     | 2.955  | 2.815 | 2.815 |
| 207091_at    | <i>P2RX7</i>     | 2.245  | 2.125 | 2.125 |
| 208311_at    | <i>GPR50</i>     | 2.285  | 2.175 | 2.165 |
| 1553642_at   | <i>C9orf163</i>  | 2.145  | 2.045 | 2.045 |
| 205026_at    | <i>STAT5B</i>    | 2.655  | 2.515 | 2.525 |
| 226711_at    | <i>FOXN2</i>     | 10.355 | 9.835 | 9.845 |
| 1553151_at   | <i>ATP6V0D2</i>  | 2.35   | 2.23  | 2.23  |
| 1559689_a at | <i>GRAP</i>      | 2.585  | 2.465 | 2.455 |
| 214166_at    | <i>SDHB</i>      | 2.34   | 2.22  | 2.22  |
| 1555822_at   | <i>LOC641702</i> | 2.43   | 2.31  | 2.31  |
| 214750_at    | <i>PLAC4</i>     | 2.48   | 2.36  | 2.36  |
| 216598_s at  | <i>CCL2</i>      | 2.79   | 2.65  | 2.65  |
| 243756_at    | <i>THSD7A</i>    | 2.41   | 2.29  | 2.29  |
| 207690_at    | <i>ALX3</i>      | 2.225  | 2.125 | 2.115 |
| 1559932_at   | <i>HEXA</i>      | 2.56   | 2.43  | 2.44  |
| 240222_at    | <i>COPS8</i>     | 3.14   | 2.99  | 2.98  |
| 210714_at    | <i>R3HDM1</i>    | 2.535  | 2.415 | 2.405 |
| 242778_at    | <i>LPXN</i>      | 3.33   | 3.16  | 3.17  |
| 1553585_a at | <i>MAGEA5</i>    | 2.525  | 2.405 | 2.405 |
| 216786_at    | <i>LOC159110</i> | 2.885  | 2.745 | 2.745 |
| 220667_at    | <i>NA</i>        | 2.97   | 2.83  | 2.83  |
| 219581_at    | <i>TSEN2</i>     | 3.175  | 3.015 | 3.015 |
| 35201_at     | <i>HNRPL</i>     | 7.895  | 7.515 | 7.515 |
| 242643_x at  | <i>PHKB</i>      | 2.61   | 2.49  | 2.48  |
| 1562730_a at | <i>SGCA</i>      | 2.47   | 2.35  | 2.35  |
| 244578_at    | <i>LCP2</i>      | 2.45   | 2.33  | 2.33  |
| 234423_x at  | <i>NA</i>        | 2.265  | 2.145 | 2.155 |
| 213464_at    | <i>SHC2</i>      | 3.125  | 2.965 | 2.975 |
| 1569833_at   | <i>NA</i>        | 2.83   | 2.69  | 2.69  |

|             |                  |        |        |        |
|-------------|------------------|--------|--------|--------|
| 237580_at   | <i>SYNE2</i>     | 2.995  | 2.855  | 2.845  |
| 1568686_at  | <i>LOC158381</i> | 2.735  | 2.595  | 2.595  |
| 208438_s_at | <i>FGR</i>       | 2.105  | 2.005  | 2.005  |
| 243529_at   | <i>MARS2</i>     | 2.53   | 2.41   | 2.41   |
| 228015_s_at | <i>TRIM8</i>     | 2.4    | 2.28   | 2.28   |
| 222465_at   | <i>C15orf15</i>  | 11.975 | 11.415 | 11.375 |
| 236759_at   | <i>RIMS3</i>     | 2.39   | 2.27   | 2.27   |
| 1560024_at  | <i>LOC388965</i> | 2.96   | 2.82   | 2.82   |
| 205949_at   | <i>CAI</i>       | 2.16   | 2.06   | 2.06   |
| 1563590_at  | <i>PTPRE</i>     | 2.52   | 2.4    | 2.4    |
| 1558941_at  | <i>ZNF704</i>    | 2.365  | 2.245  | 2.245  |
| 234313_at   | <i>NCOR1</i>     | 2.685  | 2.545  | 2.555  |
| 1563379_at  | <i>RORA</i>      | 2.37   | 2.25   | 2.25   |
| 1555319_at  | <i>STAB1</i>     | 3.2    | 3.05   | 3.03   |
| 1567558_at  | <i>TREML4</i>    | 2.56   | 2.44   | 2.44   |
| 1562743_at  | <i>ZNF83</i>     | 2.375  | 2.255  | 2.255  |
| 238572_at   | <i>MGC16211</i>  | 2.45   | 2.33   | 2.33   |
| 210123_s_at | <i>CHRNA7</i>    | 2.6    | 2.48   | 2.47   |
| 1564749_at  | <i>NA</i>        | 2.575  | 2.455  | 2.445  |
| 237508_at   | <i>CPEB3</i>     | 2.55   | 2.43   | 2.42   |
| 208154_at   | <i>LOC51336</i>  | 2.32   | 2.21   | 2.2    |
| 231382_at   | <i>FGF18</i>     | 2.295  | 2.185  | 2.175  |
| 237357_at   | <i>LOC728119</i> | 2.535  | 2.415  | 2.405  |
| 235491_at   | <i>ZBTB10</i>    | 2.605  | 2.485  | 2.475  |
| 1563287_at  | <i>NA</i>        | 2.485  | 2.365  | 2.365  |
| 213597_s_at | <i>CTDSPL</i>    | 2.375  | 2.255  | 2.255  |
| 244218_at   | <i>SND1</i>      | 2.86   | 2.73   | 2.71   |
| 1552714_at  | <i>CREG2</i>     | 2.57   | 2.45   | 2.44   |
| 1566253_at  | <i>LRRC37B</i>   | 2.85   | 2.71   | 2.71   |
| 202707_at   | <i>UMPS</i>      | 2.36   | 2.24   | 2.24   |
| 223873_s_at | <i>EPN1</i>      | 2.795  | 2.655  | 2.655  |

|              |                  |        |        |        |
|--------------|------------------|--------|--------|--------|
| 217676_at    | <i>NA</i>        | 2.37   | 2.25   | 2.25   |
| 244077_at    | <i>NEBL</i>      | 2.615  | 2.495  | 2.495  |
| 1557427_at   | <i>NA</i>        | 2.94   | 2.8    | 2.8    |
| 208787_at    | <i>MRPL3</i>     | 12.485 | 11.885 | 11.875 |
| 203781_at    | <i>MRPL33</i>    | 10.65  | 10.14  | 10.13  |
| 238586_at    | <i>TNK2</i>      | 2.315  | 2.195  | 2.195  |
| 237491_at    | <i>MYH10</i>     | 2.57   | 2.45   | 2.44   |
| 217133_x_at  | <i>CYP2B6</i>    | 2.52   | 2.4    | 2.4    |
| 207988_s_at  | <i>ARPC2</i>     | 12.26  | 11.63  | 11.69  |
| 243118_at    | <i>C6orf182</i>  | 6.31   | 6      | 6.01   |
| 218509_at    | <i>LPPR2</i>     | 4.53   | 4.31   | 4.31   |
| 1565192_at   | <i>NA</i>        | 2.79   | 2.65   | 2.65   |
| 1561222_at   | <i>LOC283432</i> | 3.185  | 3.035  | 3.025  |
| 233608_at    | <i>RBMS3</i>     | 2.56   | 2.44   | 2.44   |
| 205723_at    | <i>CNTFR</i>     | 3.465  | 3.305  | 3.295  |
| 227901_at    | <i>AXIIR</i>     | 6.9    | 6.58   | 6.55   |
| 214186_s_at  | <i>3.8-1</i>     | 3.145  | 2.995  | 2.985  |
| 237908_at    | <i>LOC554203</i> | 2.635  | 2.505  | 2.515  |
| 205852_at    | <i>CDK5R2</i>    | 3      | 2.85   | 2.86   |
| 241695_s_at  | <i>KLHL6</i>     | 2.58   | 2.46   | 2.46   |
| 208849_at    | <i>NA</i>        | 2.825  | 2.685  | 2.685  |
| 216413_at    | <i>NA</i>        | 2.725  | 2.595  | 2.585  |
| 215005_at    | <i>EFCBP2</i>    | 2.55   | 2.43   | 2.43   |
| 233627_at    | <i>MKLI</i>      | 2.735  | 2.605  | 2.595  |
| 223619_x_at  | <i>PECR</i>      | 7.945  | 7.575  | 7.555  |
| 221327_s_at  | <i>OPNIMW</i>    | 2.265  | 2.155  | 2.165  |
| 241663_at    | <i>C3orf23</i>   | 2.395  | 2.275  | 2.275  |
| 232760_at    | <i>TEX15</i>     | 2.665  | 2.545  | 2.535  |
| 229868_s_at  | <i>GDF15</i>     | 2.725  | 2.595  | 2.585  |
| 1554717_a_at | <i>PDE4D</i>     | 2.53   | 2.41   | 2.41   |
| 1564413_at   | <i>FLJ36116</i>  | 4.445  | 4.225  | 4.225  |

|              |                  |        |        |        |
|--------------|------------------|--------|--------|--------|
| 208833_s_at  | <i>ATXN10</i>    | 10.865 | 10.355 | 10.335 |
| 202641_at    | <i>ARL3</i>      | 10.73  | 10.2   | 10.22  |
| 222564_at    | <i>POGK</i>      | 3.145  | 2.985  | 2.995  |
| 229558_at    | <i>MGC16824</i>  | 6.195  | 5.905  | 5.895  |
| 1570190_at   | <i>LSAMP</i>     | 2.95   | 2.82   | 2.8    |
| 212962_at    | <i>SYDE1</i>     | 2.7    | 2.57   | 2.58   |
| 1556166_x_at | <i>NA</i>        | 2.56   | 2.44   | 2.44   |
| 232301_at    | <i>UBE3B</i>     | 2.765  | 2.625  | 2.635  |
| 1562094_at   | <i>MGC26963</i>  | 2.47   | 2.35   | 2.35   |
| 215696_s_at  | <i>KIAA0310</i>  | 10.78  | 10.26  | 10.26  |
| 239465_at    | <i>UQCRC2</i>    | 2.62   | 2.5    | 2.5    |
| 1554385_a_at | <i>PADI2</i>     | 2.455  | 2.335  | 2.335  |
| 1569061_at   | <i>IQGAP3</i>    | 3.085  | 2.945  | 2.945  |
| 223756_at    | <i>FLJ10081</i>  | 2.47   | 2.35   | 2.35   |
| 207200_at    | <i>OTC</i>       | 2.295  | 2.195  | 2.185  |
| 1561733_at   | <i>INPP5A</i>    | 2.605  | 2.485  | 2.485  |
| 208067_x_at  | <i>UTY</i>       | 2.795  | 2.665  | 2.655  |
| 221993_s_at  | <i>C16orf42</i>  | 2.655  | 2.525  | 2.535  |
| 1553861_at   | <i>TCP11L2</i>   | 2.64   | 2.52   | 2.52   |
| 1556374_s_at | <i>TTC7B</i>     | 2.09   | 1.99   | 1.99   |
| 216709_at    | <i>LOC400655</i> | 2.685  | 2.565  | 2.555  |
| 237565_at    | <i>GCC2</i>      | 2.51   | 2.39   | 2.39   |
| 1555336_a_at | <i>ITGA9</i>     | 2.275  | 2.175  | 2.165  |
| 215101_s_at  | <i>CXCL5</i>     | 2.705  | 2.585  | 2.575  |
| 226380_at    | <i>PTPN21</i>    | 8.745  | 8.345  | 8.305  |
| 1561916_at   | <i>NA</i>        | 2.545  | 2.425  | 2.425  |
| 244570_at    | <i>NA</i>        | 2.49   | 2.37   | 2.37   |
| 1569277_at   | <i>ZNF91</i>     | 3.085  | 2.945  | 2.945  |
| 236810_at    | <i>ITGB7</i>     | 2.55   | 2.43   | 2.42   |
| 1564010_at   | <i>CAST</i>      | 2.19   | 2.09   | 2.09   |
| 216653_at    | <i>DR1</i>       | 2.485  | 2.365  | 2.365  |



|              |                    |        |        |        |
|--------------|--------------------|--------|--------|--------|
| 215032_at    | <i>RREB1</i>       | 3.8    | 3.62   | 3.62   |
| 219404_at    | <i>EPS8L3</i>      | 2.2    | 2.1    | 2.1    |
| 1562905_at   | <i>NA</i>          | 3.34   | 3.18   | 3.18   |
| 224896_s_at  | <i>TTL</i>         | 11.635 | 11.075 | 11.085 |
| 1556665_at   | <i>TTC6</i>        | 2.665  | 2.545  | 2.535  |
| 205269_at    | <i>LCP2</i>        | 2.93   | 2.8    | 2.78   |
| 232320_at    | <i>LOC391142</i>   | 2.92   | 2.78   | 2.79   |
| 1562264_at   | <i>LOC339685</i>   | 2.19   | 2.09   | 2.09   |
| 1562687_x_at | <i>hCG_1660379</i> | 2.205  | 2.105  | 2.105  |
| 244030_at    | <i>STYX</i>        | 2.675  | 2.545  | 2.555  |
| 215680_at    | <i>KIAA1654</i>    | 2.43   | 2.31   | 2.31   |
| 200993_at    | <i>IPO7</i>        | 12.355 | 11.775 | 11.775 |
| 239122_at    | <i>NA</i>          | 2.1    | 2      | 2      |
| 224146_s_at  | <i>ABCC11</i>      | 2.61   | 2.49   | 2.49   |
| 216627_s_at  | <i>B4GALT1</i>     | 2.665  | 2.545  | 2.545  |
| 238210_at    | <i>RYK</i>         | 2.4    | 2.28   | 2.28   |
| 1555719_a_at | <i>C3orf15</i>     | 2.94   | 2.8    | 2.8    |
| 244340_x_at  | <i>NA</i>          | 4.085  | 3.885  | 3.895  |
| 233483_at    | <i>LOC96597</i>    | 2.65   | 2.53   | 2.53   |
| 1555210_at   | <i>DTWD1</i>       | 2.705  | 2.585  | 2.575  |
| 216715_at    | <i>LOC442258</i>   | 3.08   | 2.93   | 2.94   |
| 1559394_a_at | <i>RORI</i>        | 2.855  | 2.715  | 2.715  |
| 1562793_at   | <i>NA</i>          | 3.26   | 3.1    | 3.11   |
| 240768_x_at  | <i>UBXD2</i>       | 2.97   | 2.83   | 2.83   |
| 232190_x_at  | <i>LOC115110</i>   | 5.25   | 5.02   | 4.99   |
| 224206_x_at  | <i>MYNN</i>        | 7.11   | 6.76   | 6.78   |
| 233233_at    | <i>RASSF3</i>      | 2.98   | 2.84   | 2.83   |
| 226361_at    | <i>TMEM42</i>      | 4.67   | 4.45   | 4.45   |
| 238535_at    | <i>CEP152</i>      | 3.045  | 2.905  | 2.895  |
| 242943_at    | <i>ST8SIA4</i>     | 2.51   | 2.39   | 2.39   |
| 1558081_at   | <i>RPL12</i>       | 2.415  | 2.295  | 2.295  |

|              |                  |       |       |       |
|--------------|------------------|-------|-------|-------|
| 208081_s_at  | <i>ZNF442</i>    | 3.125 | 2.975 | 2.985 |
| 233716_at    | <i>LOC645256</i> | 3.135 | 2.995 | 2.995 |
| 1564333_a_at | <i>SORCS2</i>    | 2.45  | 2.33  | 2.33  |
| 243674_at    | <i>NA</i>        | 3     | 2.86  | 2.86  |
| 1556996_at   | <i>NA</i>        | 2.4   | 2.29  | 2.28  |
| 206711_at    | <i>CXorf1</i>    | 2.37  | 2.26  | 2.25  |
| 1554069_at   | <i>EPHA8</i>     | 3.48  | 3.33  | 3.31  |
| 230775_s_at  | <i>SPG20</i>     | 2.26  | 2.16  | 2.16  |
| 238455_at    | <i>NA</i>        | 2.575 | 2.455 | 2.445 |
| 1561706_at   | <i>NA</i>        | 2.355 | 2.245 | 2.235 |
| 242455_at    | <i>POU3F2</i>    | 2.845 | 2.705 | 2.715 |
| 234389_x_at  | <i>NA</i>        | 2.425 | 2.315 | 2.305 |
| 1569909_at   | <i>KRT6L</i>     | 3.07  | 2.92  | 2.93  |
| 1558868_a_at | <i>DSE</i>       | 2.445 | 2.325 | 2.335 |
| 215257_at    | <i>ERGIC3</i>    | 2.65  | 2.53  | 2.53  |
| 244217_at    | <i>A2BP1</i>     | 2.885 | 2.745 | 2.745 |
| 240236_at    | <i>NA</i>        | 2.765 | 2.645 | 2.635 |
| 239266_at    | <i>SNHG5</i>     | 2.98  | 2.84  | 2.84  |
| 208758_at    | <i>ATIC</i>      | 8.14  | 7.75  | 7.77  |
| 244222_at    | <i>NA</i>        | 3.17  | 3.03  | 3.02  |
| 213731_s_at  | <i>TCF3</i>      | 2.29  | 2.19  | 2.19  |
| 232885_at    | <i>LOC92482</i>  | 2.72  | 2.59  | 2.6   |
| 1560407_at   | <i>MARK1</i>     | 2.71  | 2.59  | 2.58  |
| 211341_at    | <i>POU4F1</i>    | 2.5   | 2.38  | 2.38  |
| 234408_at    | <i>IL17F</i>     | 2.455 | 2.335 | 2.335 |
| 1569294_at   | <i>RNF187</i>    | 2.11  | 2.01  | 2.01  |
| 220469_at    | <i>COPE</i>      | 2.32  | 2.21  | 2.22  |
| 1561417_x_at | <i>LOC727792</i> | 3.115 | 2.975 | 2.975 |
| 221118_at    | <i>PKD2L2</i>    | 3.03  | 2.89  | 2.89  |
| 230883_at    | <i>NA</i>        | 2.56  | 2.44  | 2.44  |
| 1555379_at   | <i>MGC52498</i>  | 2.56  | 2.44  | 2.44  |

|              |                 |        |        |        |
|--------------|-----------------|--------|--------|--------|
| 237000_at    | <i>NA</i>       | 3.365  | 3.215  | 3.205  |
| 225124_at    | <i>PPP1R9B</i>  | 3.49   | 3.33   | 3.33   |
| 238100_at    | <i>AAK1</i>     | 2.6    | 2.48   | 2.48   |
| 227299_at    | <i>CCNI</i>     | 4.525  | 4.305  | 4.315  |
| 208026_at    | <i>HIST1H4F</i> | 2.53   | 2.41   | 2.41   |
| 1555340_x_at | <i>RAP1A</i>    | 2.25   | 2.15   | 2.15   |
| 244625_at    | <i>RERE</i>     | 2.775  | 2.645  | 2.655  |
| 237149_at    | <i>NA</i>       | 2.64   | 2.52   | 2.52   |
| 205982_x_at  | <i>SFTPC</i>    | 2.065  | 1.965  | 1.965  |
| 204325_s_at  | <i>NF1</i>      | 3.43   | 3.27   | 3.27   |
| 243412_at    | <i>EMR4</i>     | 3.03   | 2.89   | 2.89   |
| 235442_at    | <i>CXorf56</i>  | 2.845  | 2.705  | 2.705  |
| 228994_at    | <i>CCDC24</i>   | 2.455  | 2.335  | 2.345  |
| 1554495_s_at | <i>MTHFSD</i>   | 2.54   | 2.42   | 2.42   |
| 210466_s_at  | <i>SERBP1</i>   | 12.355 | 11.755 | 11.805 |
| 1556867_at   | <i>NA</i>       | 2.56   | 2.44   | 2.44   |
| 239119_at    | <i>NA</i>       | 2.09   | 1.99   | 1.99   |
| 221244_s_at  | <i>PDPK1</i>    | 2.225  | 2.125  | 2.125  |
| 1561721_a_at | <i>C12orf40</i> | 3.03   | 2.89   | 2.89   |
| 219444_at    | <i>BCORL1</i>   | 5.58   | 5.32   | 5.32   |
| 1552584_at   | <i>IL12RB1</i>  | 2.57   | 2.45   | 2.45   |
| 221027_s_at  | <i>PLA2G12A</i> | 8.435  | 8.025  | 8.055  |
| 244553_at    | <i>NA</i>       | 2.84   | 2.71   | 2.7    |
| 1554526_at   | <i>OLFM3</i>    | 3.01   | 2.87   | 2.88   |
| 232743_at    | <i>KIAA1833</i> | 2.865  | 2.725  | 2.735  |
| 228409_at    | <i>KIAA1881</i> | 2.745  | 2.625  | 2.625  |
| 1563241_at   | <i>PHF12</i>    | 3.11   | 2.97   | 2.96   |
| 230811_at    | <i>CDK10</i>    | 2.525  | 2.405  | 2.405  |
| 1560742_at   | <i>ALS2</i>     | 2.52   | 2.4    | 2.4    |
| 241311_at    | <i>ST18</i>     | 2.505  | 2.385  | 2.385  |
| 213963_s_at  | <i>SAP30</i>    | 2.945  | 2.815  | 2.805  |

|              |                     |        |       |       |
|--------------|---------------------|--------|-------|-------|
| 241012_at    | <i>LOC647336</i>    | 2.69   | 2.56  | 2.57  |
| 210936_at    | <i>WDR1</i>         | 3.39   | 3.23  | 3.24  |
| 224063_at    | <i>NLN</i>          | 2.7    | 2.58  | 2.57  |
| 236220_at    | <i>NA</i>           | 2.625  | 2.505 | 2.505 |
| 210482_x_at  | <i>MAP2K5</i>       | 2.325  | 2.225 | 2.225 |
| 240522_at    | <i>BAIAP2L1</i>     | 2.795  | 2.675 | 2.665 |
| 219896_at    | <i>DRDIIP</i>       | 2.21   | 2.11  | 2.11  |
| 238953_at    | <i>SP2</i>          | 2.6    | 2.48  | 2.48  |
| 1564906_at   | <i>SNHG4</i>        | 2.355  | 2.255 | 2.255 |
| 1559503_a_at | <i>LOC441666</i>    | 3.03   | 2.9   | 2.89  |
| 1569401_at   | <i>CLEC12A</i>      | 2.815  | 2.695 | 2.685 |
| 227803_at    | <i>ENPP5</i>        | 3.11   | 2.97  | 2.96  |
| 225336_at    | <i>NA</i>           | 10.345 | 9.895 | 9.835 |
| 236287_at    | <i>ZNF22</i>        | 2.775  | 2.655 | 2.645 |
| 240947_at    | <i>TMEM16F</i>      | 2.715  | 2.595 | 2.585 |
| 232251_at    | <i>NUDT16P</i>      | 2.56   | 2.45  | 2.44  |
| 244395_at    | <i>FLJ41455</i>     | 3.02   | 2.88  | 2.88  |
| 233087_at    | <i>FBXL17</i>       | 2.785  | 2.665 | 2.665 |
| 1562281_at   | <i>TSPAN5</i>       | 2.66   | 2.54  | 2.54  |
| 1569819_at   | <i>C15orf2</i>      | 2.355  | 2.255 | 2.245 |
| 236818_at    | <i>NAALADL2</i>     | 2.495  | 2.375 | 2.375 |
| 1570473_at   | <i>LOC338579</i>    | 3.08   | 2.94  | 2.93  |
| 237114_at    | <i>HERC4</i>        | 2.995  | 2.855 | 2.855 |
| 227568_at    | <i>HECTD2</i>       | 9.425  | 8.985 | 9.015 |
| 216403_at    | <i>RP11-114G1.1</i> | 2.485  | 2.365 | 2.375 |
| 1555141_a_at | <i>NHEDC1</i>       | 2.81   | 2.69  | 2.68  |
| 214958_s_at  | <i>TMC6</i>         | 2.08   | 1.98  | 1.98  |
| 241086_at    | <i>CROP</i>         | 2.96   | 2.82  | 2.82  |
| 220255_at    | <i>FANCE</i>        | 6.845  | 6.515 | 6.535 |
| 207287_at    | <i>FLJ14107</i>     | 2.68   | 2.56  | 2.56  |
| 215901_at    | <i>ZNF81</i>        | 2.725  | 2.595 | 2.605 |

|              |                 |       |       |       |
|--------------|-----------------|-------|-------|-------|
| 1559142_at   | <i>MYST3</i>    | 2.835 | 2.705 | 2.715 |
| 1553101_a_at | <i>ALKBH5</i>   | 4.78  | 4.55  | 4.57  |
| 227716_at    | <i>UBXD5</i>    | 2.995 | 2.855 | 2.855 |
| 224165_s_at  | <i>IQCH</i>     | 2.95  | 2.81  | 2.81  |
| 1558678_s_at | <i>MALAT1</i>   | 15.61 | 14.91 | 14.9  |
| 214248_s_at  | <i>TRIM2</i>    | 2.28  | 2.18  | 2.18  |
| 216516_at    | <i>NA</i>       | 3.235 | 3.085 | 3.095 |
| 244784_at    | <i>DHX57</i>    | 2.815 | 2.685 | 2.695 |
| 240621_at    | <i>ATM</i>      | 2.31  | 2.21  | 2.21  |
| 234337_at    | <i>TTL9</i>     | 2.885 | 2.745 | 2.755 |
| 226187_at    | <i>CDS1</i>     | 2.435 | 2.315 | 2.325 |
| 212629_s_at  | <i>PKN2</i>     | 10.03 | 9.56  | 9.58  |
| 208085_s_at  | <i>ARHGAP6</i>  | 2.365 | 2.265 | 2.265 |
| 215825_at    | <i>NA</i>       | 2.795 | 2.675 | 2.665 |
| 228656_at    | <i>PROX1</i>    | 2.415 | 2.315 | 2.305 |
| 233091_at    | <i>ATAD3B</i>   | 2.335 | 2.235 | 2.235 |
| 1553847_a_at | <i>SPERT</i>    | 2.365 | 2.265 | 2.265 |
| 1561288_at   | <i>NA</i>       | 2.71  | 2.59  | 2.58  |
| 220637_at    | <i>FAM124B</i>  | 2.385 | 2.285 | 2.285 |
| 217696_at    | <i>FUT7</i>     | 4.785 | 4.575 | 4.565 |
| 240355_at    | <i>NA</i>       | 2.895 | 2.765 | 2.755 |
| 216812_at    | <i>NA</i>       | 2.14  | 2.04  | 2.04  |
| 1554916_a_at | <i>JRK</i>      | 2.455 | 2.335 | 2.345 |
| 241919_x_at  | <i>WDR31</i>    | 3.425 | 3.265 | 3.265 |
| 237123_x_at  | <i>KLHL9</i>    | 3.08  | 2.94  | 2.94  |
| 1561881_at   | <i>NA</i>       | 2.8   | 2.67  | 2.68  |
| 1560781_at   | <i>C11orf47</i> | 2.82  | 2.7   | 2.7   |
| 208659_at    | <i>CLIC1</i>    | 12.09 | 11.58 | 11.52 |
| 240977_at    | <i>LRCH1</i>    | 2.935 | 2.795 | 2.805 |
| 215554_at    | <i>GPLD1</i>    | 2.6   | 2.48  | 2.48  |
| 1553888_at   | <i>LDHAL6A</i>  | 2.55  | 2.43  | 2.44  |

|              |                  |        |        |        |
|--------------|------------------|--------|--------|--------|
| 1566999_at   | <i>DTDI</i>      | 3.425  | 3.275  | 3.265  |
| 1561777_at   | <i>C21orf34</i>  | 2.66   | 2.54   | 2.54   |
| 213751_at    | <i>LOC284352</i> | 2.6    | 2.48   | 2.48   |
| 238266_at    | <i>NA</i>        | 2.555  | 2.435  | 2.445  |
| 221468_at    | <i>XCRI</i>      | 2.265  | 2.165  | 2.165  |
| 1559410_at   | <i>LOC389634</i> | 2.525  | 2.415  | 2.405  |
| 227328_at    | <i>CAMTA1</i>    | 7.475  | 7.125  | 7.155  |
| 207873_x_at  | <i>SEZ6L</i>     | 2.36   | 2.26   | 2.26   |
| 215895_x_at  | <i>ADFP</i>      | 2.835  | 2.705  | 2.715  |
| 207617_at    | <i>DDX3X</i>     | 2.67   | 2.55   | 2.55   |
| 240436_at    | <i>LOC650794</i> | 2.36   | 2.26   | 2.26   |
| 1554733_at   | <i>MGC24125</i>  | 2.76   | 2.64   | 2.64   |
| 231070_at    | <i>IYD</i>       | 2.995  | 2.865  | 2.855  |
| 241623_at    | <i>PTPN2</i>     | 2.565  | 2.445  | 2.445  |
| 217024_x_at  | <i>SIRPA</i>     | 2.565  | 2.445  | 2.455  |
| 233134_at    | <i>RPH3AL</i>    | 3.04   | 2.9    | 2.9    |
| 208881_x_at  | <i>IDII</i>      | 10.075 | 9.625  | 9.635  |
| 243193_at    | <i>GPC3</i>      | 2.66   | 2.54   | 2.54   |
| 1564753_at   | <i>LASS6</i>     | 2.975  | 2.835  | 2.835  |
| 230466_s_at  | <i>RASSF3</i>    | 12.825 | 12.275 | 12.225 |
| 203555_at    | <i>PTPN18</i>    | 4.21   | 4.03   | 4.02   |
| 240163_at    | <i>RORA</i>      | 3.18   | 3.04   | 3.04   |
| 1555129_at   | <i>NA</i>        | 2.16   | 2.06   | 2.06   |
| 1561278_at   | <i>NA</i>        | 2.575  | 2.465  | 2.455  |
| 211129_x_at  | <i>EDA</i>       | 2.24   | 2.14   | 2.14   |
| 230429_at    | <i>ASPH</i>      | 2.365  | 2.265  | 2.265  |
| 233936_s_at  | <i>ZNF403</i>    | 10.685 | 10.225 | 10.195 |
| 232194_at    | <i>METTL4</i>    | 6.3    | 6.02   | 6.02   |
| 1552827_s_at | <i>SLC26A7</i>   | 2.73   | 2.61   | 2.61   |
| 228840_at    | <i>AMOTL1</i>    | 4.32   | 4.12   | 4.12   |
| 243929_at    | <i>ZNF533</i>    | 2.465  | 2.365  | 2.355  |

|             |                  |       |       |       |
|-------------|------------------|-------|-------|-------|
| 213267_at   | <i>DOPEY1</i>    | 3.14  | 3     | 3     |
| 220656_at   | <i>NARGIL</i>    | 3.1   | 2.96  | 2.96  |
| 1555504_at  | <i>TYR</i>       | 2.965 | 2.835 | 2.825 |
| 215120_s_at | <i>SAMD4A</i>    | 3.095 | 2.965 | 2.955 |
| 221661_at   | <i>SLC22A7</i>   | 2.815 | 2.695 | 2.685 |
| 216542_x_at | <i>FI3B</i>      | 3.11  | 2.97  | 2.98  |
| 215051_x_at | <i>AIFI</i>      | 3.59  | 3.43  | 3.43  |
| 222546_s_at | <i>EPS8L2</i>    | 2.32  | 2.22  | 2.22  |
| 237473_at   | <i>LOC728448</i> | 2.18  | 2.08  | 2.08  |
| 236299_at   | <i>ZNF496</i>    | 2.41  | 2.31  | 2.3   |
| 233149_at   | <i>LOC729258</i> | 2.385 | 2.285 | 2.275 |
| 240703_s_at | <i>HERC1</i>     | 2.605 | 2.495 | 2.485 |
| 1566955_at  | <i>NA</i>        | 2.845 | 2.725 | 2.725 |
| 1562497_at  | <i>MKL2</i>      | 2.515 | 2.395 | 2.395 |
| 1565805_at  | <i>LOC728011</i> | 2.175 | 2.075 | 2.075 |
| 233990_at   | <i>FLJ12886</i>  | 2.405 | 2.305 | 2.305 |
| 207685_at   | <i>CRYBB3</i>    | 2.22  | 2.12  | 2.12  |
| 216219_at   | <i>AQP6</i>      | 3.18  | 3.04  | 3.04  |
| 215637_at   | <i>TSGA14</i>    | 2.605 | 2.495 | 2.485 |
| 244127_at   | <i>NA</i>        | 2.86  | 2.74  | 2.73  |
| 1563265_at  | <i>HNF4A</i>     | 2.925 | 2.805 | 2.795 |
| 215339_at   | <i>NKTR</i>      | 2.83  | 2.71  | 2.71  |
| 216745_x_at | <i>NA</i>        | 3.05  | 2.91  | 2.91  |
| 239796_x_at | <i>TIRAP</i>     | 2.865 | 2.745 | 2.745 |
| 244523_at   | <i>MMD</i>       | 2.33  | 2.23  | 2.23  |
| 203892_at   | <i>WFDC2</i>     | 2.135 | 2.035 | 2.035 |
| 217889_s_at | <i>CYBRD1</i>    | 7.045 | 6.735 | 6.745 |
| 224235_at   | <i>NA</i>        | 2.87  | 2.75  | 2.74  |
| 1561523_at  | <i>CCDC65</i>    | 2.915 | 2.795 | 2.785 |
| 242733_at   | <i>HPGD</i>      | 2.67  | 2.55  | 2.55  |
| 204606_at   | <i>CCL21</i>     | 2.35  | 2.25  | 2.25  |

|             |                  |       |       |       |
|-------------|------------------|-------|-------|-------|
| 241580_at   | <i>KIAA1729</i>  | 2.71  | 2.59  | 2.59  |
| 239999_at   | <i>C21orf34</i>  | 2.71  | 2.59  | 2.59  |
| 241126_at   | <i>NA</i>        | 2.955 | 2.835 | 2.835 |
| 208973_at   | <i>PRNPIP</i>    | 2.25  | 2.15  | 2.15  |
| 210917_at   | <i>YES1</i>      | 2.74  | 2.62  | 2.62  |
| 1556210_at  | <i>NA</i>        | 3.055 | 2.915 | 2.925 |
| 244767_at   | <i>NA</i>        | 3.2   | 3.05  | 3.07  |
| 1566447_at  | <i>CD6</i>       | 2.34  | 2.24  | 2.24  |
| 205094_at   | <i>PEX12</i>     | 6.89  | 6.57  | 6.6   |
| 1558570_at  | <i>LOC145783</i> | 2.495 | 2.395 | 2.385 |
| 1558470_at  | <i>MGC26733</i>  | 3.21  | 3.08  | 3.06  |
| 240052_at   | <i>ITPR1</i>     | 2.535 | 2.425 | 2.415 |
| 213171_s_at | <i>MMP24</i>     | 3     | 2.86  | 2.87  |
| 244626_at   | <i>CASZ1</i>     | 3.01  | 2.88  | 2.87  |
| 206493_at   | <i>ITGA2B</i>    | 2.445 | 2.345 | 2.345 |
| 209971_x_at | <i>JTV1</i>      | 9.135 | 8.745 | 8.735 |
| 1554367_at  | <i>FAM26C</i>    | 2.85  | 2.72  | 2.73  |
| 1563243_at  | <i>DGCR5</i>     | 2.83  | 2.71  | 2.71  |
| 214851_at   | <i>HNF4A</i>     | 2.195 | 2.095 | 2.095 |
| 1570320_at  | <i>NA</i>        | 2.885 | 2.765 | 2.765 |
| 213200_at   | <i>SYP</i>       | 3.64  | 3.48  | 3.48  |
| 219964_at   | <i>ST7L</i>      | 2.555 | 2.445 | 2.435 |
| 224139_at   | <i>C11orf76</i>  | 3.73  | 3.58  | 3.56  |
| 1562962_at  | <i>NA</i>        | 3.36  | 3.22  | 3.21  |
| 205472_s_at | <i>DACHI</i>     | 2.7   | 2.58  | 2.58  |
| 1555142_at  | <i>NHEDC1</i>    | 2.355 | 2.255 | 2.255 |
| 206313_at   | <i>HLA-DOA</i>   | 2.33  | 2.23  | 2.23  |
| 1566869_at  | <i>FRMD6</i>     | 2.29  | 2.19  | 2.19  |
| 1566846_at  | <i>NA</i>        | 3.025 | 2.895 | 2.885 |
| 205186_at   | <i>DNALII</i>    | 2.33  | 2.23  | 2.23  |
| 229941_at   | <i>LOC730112</i> | 2.135 | 2.035 | 2.035 |



|              |                  |       |       |       |
|--------------|------------------|-------|-------|-------|
| 219095_at    | <i>PLA2G4B</i>   | 2.29  | 2.19  | 2.19  |
| 209670_at    | <i>TRAC</i>      | 4.6   | 4.4   | 4.4   |
| 1558144_at   | <i>MEG3</i>      | 2.71  | 2.59  | 2.59  |
| 1557350_at   | <i>G3BP1</i>     | 2.685 | 2.565 | 2.565 |
| 244079_at    | <i>NA</i>        | 3.05  | 2.91  | 2.92  |
| 219803_at    | <i>ANGPTL3</i>   | 2.595 | 2.475 | 2.475 |
| 221458_at    | <i>HTRIF</i>     | 2.445 | 2.345 | 2.345 |
| 226645_at    | <i>KLF2</i>      | 2.555 | 2.445 | 2.435 |
| 205015_s_at  | <i>TGFA</i>      | 2.445 | 2.345 | 2.335 |
| 1558519_at   | <i>FLJ23861</i>  | 2.81  | 2.69  | 2.69  |
| 205536_at    | <i>VAV2</i>      | 2.535 | 2.415 | 2.425 |
| 233648_at    | <i>SNF1LK2</i>   | 2.7   | 2.58  | 2.58  |
| 231004_s_at  | <i>HIFX</i>      | 3.72  | 3.56  | 3.56  |
| 1566403_at   | <i>SNORA68</i>   | 2.42  | 2.32  | 2.32  |
| 1561369_at   | <i>NA</i>        | 2.71  | 2.59  | 2.59  |
| 207868_at    | <i>CHRNA2</i>    | 5.58  | 5.35  | 5.33  |
| 1554305_at   | <i>MGC20647</i>  | 2.455 | 2.355 | 2.355 |
| 243943_x_at  | <i>C6orf52</i>   | 2.595 | 2.485 | 2.475 |
| 216329_at    | <i>NA</i>        | 2.495 | 2.395 | 2.395 |
| 1562365_at   | <i>LOC286177</i> | 3.22  | 3.09  | 3.07  |
| 214183_s_at  | <i>TKTL1</i>     | 2.33  | 2.23  | 2.23  |
| 244113_at    | <i>NA</i>        | 2.26  | 2.16  | 2.16  |
| 227683_x_at  | <i>NUDT4</i>     | 2.23  | 2.13  | 2.13  |
| 243583_at    | <i>TCF7L2</i>    | 2.19  | 2.09  | 2.09  |
| 222066_at    | <i>EPB41L1</i>   | 2.955 | 2.825 | 2.835 |
| 211775_x_at  | <i>MGC13053</i>  | 2.925 | 2.805 | 2.795 |
| 233958_at    | <i>NA</i>        | 2.565 | 2.445 | 2.455 |
| 1563407_x_at | <i>ATP4B</i>     | 2.24  | 2.14  | 2.14  |
| 206459_s_at  | <i>WNT2B</i>     | 2.49  | 2.39  | 2.39  |
| 236972_at    | <i>TRIM63</i>    | 2.63  | 2.52  | 2.51  |
| 219277_s_at  | <i>OGDHL</i>     | 2.165 | 2.065 | 2.065 |

|              |                  |        |        |        |
|--------------|------------------|--------|--------|--------|
| 243678_at    | <i>NA</i>        | 2.585  | 2.475  | 2.465  |
| 216388_s_at  | <i>LTB4R</i>     | 2.6    | 2.48   | 2.48   |
| 1555853_at   | <i>PSMB9</i>     | 2.42   | 2.32   | 2.32   |
| 234327_at    | <i>NA</i>        | 2.165  | 2.065  | 2.065  |
| 1569454_a_at | <i>TMEM132D</i>  | 2.965  | 2.845  | 2.835  |
| 214481_at    | <i>HIST1H2AM</i> | 2.97   | 2.85   | 2.84   |
| 206402_s_at  | <i>NPFF</i>      | 2.69   | 2.58   | 2.57   |
| 213855_s_at  | <i>LIPE</i>      | 2.505  | 2.405  | 2.405  |
| 231071_at    | <i>NA</i>        | 2.3    | 2.2    | 2.2    |
| 232395_x_at  | <i>AGBL3</i>     | 2.945  | 2.825  | 2.825  |
| 212566_at    | <i>MAP4</i>      | 11.765 | 11.245 | 11.275 |
| 225835_at    | <i>SLC12A2</i>   | 9.245  | 8.845  | 8.845  |
| 244562_s_at  | <i>NA</i>        | 2.42   | 2.32   | 2.32   |
| 236519_at    | <i>C9orf135</i>  | 2.475  | 2.375  | 2.375  |
| 241495_at    | <i>CCNL1</i>     | 2.935  | 2.815  | 2.815  |
| 215082_at    | <i>ELOVL5</i>    | 2.71   | 2.59   | 2.59   |
| 1558154_at   | <i>LLGL2</i>     | 2.9    | 2.78   | 2.78   |
| 234375_x_at  | <i>NA</i>        | 3.2    | 3.07   | 3.06   |
| 203618_at    | <i>FAIM2</i>     | 2.37   | 2.27   | 2.27   |
| 215742_at    | <i>FBXW4</i>     | 2.515  | 2.415  | 2.415  |
| 238484_s_at  | <i>NA</i>        | 2.8    | 2.68   | 2.68   |
| 216965_x_at  | <i>SPG20</i>     | 2.605  | 2.495  | 2.485  |
| 216809_at    | <i>CYLC1</i>     | 2.47   | 2.37   | 2.37   |
| 201916_s_at  | <i>SEC63</i>     | 11.495 | 11.025 | 10.995 |
| 240164_at    | <i>MUC4</i>      | 2.46   | 2.36   | 2.36   |
| 203396_at    | <i>PSMA4</i>     | 13.12  | 12.56  | 12.56  |
| 224689_at    | <i>MANBAL</i>    | 8.165  | 7.815  | 7.825  |
| 218487_at    | <i>ALAD</i>      | 7.15   | 6.86   | 6.84   |
| 233485_at    | <i>DDAHI</i>     | 2.535  | 2.435  | 2.425  |
| 234017_at    | <i>LOC91948</i>  | 2.605  | 2.495  | 2.485  |
| 1567079_at   | <i>CLN6</i>      | 2.975  | 2.855  | 2.855  |

|              |                      |       |       |       |
|--------------|----------------------|-------|-------|-------|
| 212562_s_at  | <i>CTSZ</i>          | 2.715 | 2.595 | 2.595 |
| 1569323_at   | <i>PTPRG</i>         | 2.83  | 2.71  | 2.71  |
| 205939_at    | <i>CYP3A7</i>        | 2.41  | 2.31  | 2.31  |
| 1561192_at   | <i>C14orf143</i>     | 2.705 | 2.595 | 2.585 |
| 233327_at    | <i>C6orf157</i>      | 2.555 | 2.445 | 2.455 |
| 216644_at    | <i>NA</i>            | 2.86  | 2.74  | 2.74  |
| 1566984_at   | <i>LOC728850</i>     | 2.74  | 2.62  | 2.63  |
| 1562290_at   | <i>PPP2R2C</i>       | 3.095 | 2.965 | 2.955 |
| 217404_s_at  | <i>COL2A1</i>        | 2.455 | 2.355 | 2.355 |
| 208041_at    | <i>GRK1</i>          | 2.525 | 2.425 | 2.425 |
| 1555798_at   | <i>DKFZp761D1918</i> | 3.125 | 2.995 | 2.985 |
| 234541_s_at  | <i>ARHGEF12</i>      | 2.33  | 2.23  | 2.23  |
| 1557754_at   | <i>LOC401068</i>     | 2.615 | 2.505 | 2.495 |
| 229073_at    | <i>LOC145786</i>     | 2.995 | 2.865 | 2.875 |
| 223526_at    | <i>C18orf21</i>      | 7.345 | 7.045 | 7.035 |
| 1569783_at   | <i>LOC401387</i>     | 2.985 | 2.865 | 2.865 |
| 214304_x_at  | <i>DMN</i>           | 2.81  | 2.69  | 2.69  |
| 242227_at    | <i>TCERG1</i>        | 2.36  | 2.26  | 2.26  |
| 1556877_at   | <i>CTNNA3</i>        | 2.87  | 2.75  | 2.75  |
| 205971_s_at  | <i>CTRB1</i>         | 2.97  | 2.85  | 2.85  |
| 238579_at    | <i>C9orf85</i>       | 2.555 | 2.445 | 2.455 |
| 1560457_x_at | <i>LRG1</i>          | 2.92  | 2.8   | 2.8   |
| 221185_s_at  | <i>IQCG</i>          | 2.34  | 2.24  | 2.24  |
| 1556247_a_at | <i>LRRC62</i>        | 2.515 | 2.405 | 2.415 |
| 220488_s_at  | <i>BCAS3</i>         | 2.56  | 2.45  | 2.46  |
| 211468_s_at  | <i>RECQL5</i>        | 2.495 | 2.395 | 2.395 |
| 207468_s_at  | <i>SFRP5</i>         | 3.135 | 3.005 | 2.995 |
| 240921_at    | <i>NA</i>            | 2.81  | 2.69  | 2.69  |
| 221945_at    | <i>FBXO41</i>        | 3.075 | 2.955 | 2.955 |
| 243285_at    | <i>EIF4B</i>         | 2.23  | 2.13  | 2.13  |
| 1558406_a_at | <i>EXPH5</i>         | 3     | 2.88  | 2.87  |

|              |                  |        |        |        |
|--------------|------------------|--------|--------|--------|
| 220549_at    | <i>RAD54B</i>    | 2.785  | 2.665  | 2.665  |
| 1552969_a_at | <i>ZMYM6</i>     | 2.975  | 2.855  | 2.855  |
| 231065_at    | <i>PDE6D</i>     | 2.755  | 2.635  | 2.635  |
| 1557907_x_at | <i>MUC12</i>     | 2.615  | 2.505  | 2.515  |
| 205203_at    | <i>PLD1</i>      | 2.87   | 2.75   | 2.75   |
| 219535_at    | <i>HUNK</i>      | 2.655  | 2.545  | 2.535  |
| 1565881_at   | <i>GRLF1</i>     | 2.995  | 2.875  | 2.865  |
| 205147_x_at  | <i>NCF4</i>      | 2.54   | 2.44   | 2.44   |
| 213091_at    | <i>CRTC1</i>     | 2.565  | 2.455  | 2.465  |
| 239006_at    | <i>SLC26A7</i>   | 3.105  | 2.985  | 2.975  |
| 244814_at    | <i>UGCGL1</i>    | 2.9    | 2.78   | 2.78   |
| 218171_at    | <i>VPS4B</i>     | 12.195 | 11.685 | 11.695 |
| 229818_at    | <i>SVOP</i>      | 2.45   | 2.35   | 2.35   |
| 239701_at    | <i>ENTPD1</i>    | 2.46   | 2.36   | 2.36   |
| 217303_s_at  | <i>ADRB3</i>     | 2.5    | 2.4    | 2.4    |
| 232945_at    | <i>FLJ32312</i>  | 3.17   | 3.03   | 3.04   |
| 210341_at    | <i>MYT1</i>      | 3.195  | 3.055  | 3.065  |
| 216144_at    | <i>ATXN7L1</i>   | 2.83   | 2.72   | 2.71   |
| 221769_at    | <i>SPSB3</i>     | 2.95   | 2.82   | 2.83   |
| 1570276_a_at | <i>GATA4</i>     | 2.43   | 2.33   | 2.33   |
| 224753_at    | <i>CDCA5</i>     | 2.83   | 2.71   | 2.71   |
| 244852_at    | <i>DSEL</i>      | 2.93   | 2.81   | 2.81   |
| 1562923_at   | <i>NA</i>        | 2.53   | 2.43   | 2.43   |
| 216469_at    | <i>NA</i>        | 2.82   | 2.7    | 2.7    |
| 221313_at    | <i>GPR52</i>     | 3.76   | 3.6    | 3.6    |
| 231437_at    | <i>SLC35D2</i>   | 2.95   | 2.83   | 2.83   |
| 235607_at    | <i>HNRPD</i>     | 2.82   | 2.7    | 2.7    |
| 231709_x_at  | <i>MYO16</i>     | 2.865  | 2.755  | 2.745  |
| 222264_at    | <i>BSCL2</i>     | 5.105  | 4.895  | 4.885  |
| 242766_at    | <i>LOC391269</i> | 2.51   | 2.41   | 2.41   |
| 213317_at    | <i>CLIC5</i>     | 2.34   | 2.24   | 2.24   |

|              |                 |       |       |       |
|--------------|-----------------|-------|-------|-------|
| 239681_at    | <i>C17orf56</i> | 2.92  | 2.8   | 2.8   |
| 201180_s_at  | <i>GNAI3</i>    | 12.99 | 12.44 | 12.46 |
| 224029_x_at  | <i>SCN11A</i>   | 3     | 2.88  | 2.88  |
| 215664_s_at  | <i>EPHA5</i>    | 2.545 | 2.445 | 2.435 |
| 1566760_at   | <i>FLJ34208</i> | 2.5   | 2.4   | 2.4   |
| 215162_at    | <i>GARNL1</i>   | 3.07  | 2.95  | 2.95  |
| 233989_at    | <i>NA</i>       | 2.33  | 2.23  | 2.23  |
| 233509_at    | <i>HERC4</i>    | 2.39  | 2.29  | 2.29  |
| 1557856_at   | <i>DADI</i>     | 2.48  | 2.38  | 2.38  |
| 1566551_at   | <i>PDZRN3</i>   | 2.585 | 2.485 | 2.485 |
| 231356_at    | <i>MBP</i>      | 3.095 | 2.975 | 2.965 |
| 228118_x_at  | <i>MGC13114</i> | 3.42  | 3.28  | 3.28  |
| 202183_s_at  | <i>KIF22</i>    | 2.765 | 2.645 | 2.655 |
| 1559413_at   | <i>TCP11L2</i>  | 3.11  | 2.99  | 2.99  |
| 239769_at    | <i>CDH11</i>    | 2.4   | 2.3   | 2.3   |
| 1567682_x_at | <i>SNORA74A</i> | 2.685 | 2.575 | 2.565 |
| 207077_at    | <i>ELA2B</i>    | 2.52  | 2.42  | 2.42  |
| 1560201_at   | <i>ZNF713</i>   | 2.91  | 2.79  | 2.79  |
| 241380_at    | <i>FLJ41603</i> | 2.96  | 2.84  | 2.84  |
| 1556110_at   | <i>NA</i>       | 2.28  | 2.18  | 2.18  |
| 220402_at    | <i>P53AIP1</i>  | 2.73  | 2.61  | 2.61  |
| 214294_at    | <i>NFIA</i>     | 3.125 | 3.005 | 2.995 |
| 239966_at    | <i>MEF2C</i>    | 2.845 | 2.725 | 2.725 |
| 240828_at    | <i>JARID2</i>   | 2.325 | 2.225 | 2.225 |
| 215413_at    | <i>EXOC7</i>    | 2.67  | 2.57  | 2.56  |
| 201371_s_at  | <i>CUL3</i>     | 12.1  | 11.63 | 11.58 |
| 233751_at    | <i>ATBF1</i>    | 2.44  | 2.34  | 2.34  |
| 240927_at    | <i>NA</i>       | 2.715 | 2.595 | 2.605 |
| 213283_s_at  | <i>SALL2</i>    | 3.5   | 3.36  | 3.36  |
| 244568_at    | <i>SYNE2</i>    | 2.715 | 2.605 | 2.595 |
| 1569188_s_at | <i>RPL10</i>    | 2.855 | 2.745 | 2.735 |

|              |                     |        |        |        |
|--------------|---------------------|--------|--------|--------|
| 206812_at    | <i>ADRB3</i>        | 2.39   | 2.29   | 2.29   |
| 1562082_at   | <i>NA</i>           | 2.795  | 2.675  | 2.675  |
| 231664_at    | <i>SLC25A29</i>     | 2.81   | 2.7    | 2.69   |
| 210314_x_at  | <i>TNFSF13</i>      | 2.355  | 2.255  | 2.255  |
| 1563162_at   | <i>NA</i>           | 2.295  | 2.195  | 2.195  |
| 209181_s_at  | <i>RABGGTB</i>      | 11.98  | 11.47  | 11.53  |
| 244592_at    | <i>FLII</i>         | 2.705  | 2.595  | 2.605  |
| 224683_at    | <i>FBXO18</i>       | 8.585  | 8.245  | 8.235  |
| 212668_at    | <i>SMURF1</i>       | 2.51   | 2.41   | 2.41   |
| 220854_at    | <i>NA</i>           | 3.325  | 3.185  | 3.185  |
| 220965_s_at  | <i>RSHL1</i>        | 2.55   | 2.45   | 2.45   |
| 217603_at    | <i>ATP6V0A2</i>     | 2.51   | 2.41   | 2.41   |
| 241319_at    | <i>EXOC6</i>        | 2.605  | 2.505  | 2.495  |
| 1553674_at   | <i>LRRC44</i>       | 3.08   | 2.96   | 2.96   |
| 1555572_at   | <i>CA6</i>          | 2.375  | 2.275  | 2.275  |
| 228214_at    | <i>NA</i>           | 2.845  | 2.735  | 2.725  |
| 226286_at    | <i>RBED1</i>        | 2.6    | 2.5    | 2.5    |
| 1556078_at   | <i>LOC143286</i>    | 2.595  | 2.485  | 2.495  |
| 235621_at    | <i>LOC653186</i>    | 3.665  | 3.525  | 3.525  |
| 1566963_at   | <i>NA</i>           | 2.42   | 2.32   | 2.32   |
| 227983_at    | <i>MGC7036</i>      | 7.97   | 7.64   | 7.66   |
| 1557631_at   | <i>SLC25A4</i>      | 2.84   | 2.73   | 2.72   |
| 214324_at    | <i>GP2</i>          | 2.635  | 2.535  | 2.535  |
| 1557630_s_at | <i>NA</i>           | 3.365  | 3.225  | 3.225  |
| 1568789_at   | <i>C6orf107</i>     | 2.37   | 2.27   | 2.27   |
| 215259_s_at  | <i>CADM4</i>        | 2.41   | 2.31   | 2.31   |
| 1569677_a_at | <i>C8orf45</i>      | 2.59   | 2.49   | 2.49   |
| 213811_x_at  | <i>TCF3</i>         | 10.575 | 10.135 | 10.165 |
| 242623_x_at  | <i>RP11-506K6.3</i> | 2.895  | 2.775  | 2.775  |
| 237197_at    | <i>LEMD1</i>        | 2.45   | 2.35   | 2.35   |
| 225823_at    | <i>PII7</i>         | 6.745  | 6.485  | 6.475  |

|              |                  |        |        |        |
|--------------|------------------|--------|--------|--------|
| 215968_at    | <i>FAM55C</i>    | 3      | 2.88   | 2.88   |
| 229681_at    | <i>NA</i>        | 2.62   | 2.52   | 2.52   |
| 219845_at    | <i>BARX1</i>     | 2.41   | 2.31   | 2.31   |
| 214897_at    | <i>KIAA0506</i>  | 2.625  | 2.525  | 2.525  |
| 205202_at    | <i>PCMT1</i>     | 12.835 | 12.305 | 12.335 |
| 237787_at    | <i>NA</i>        | 2.565  | 2.465  | 2.465  |
| 1554234_at   | <i>KATNAL2</i>   | 2.53   | 2.43   | 2.43   |
| 211920_at    | <i>CFB</i>       | 3.53   | 3.39   | 3.39   |
| 204992_s_at  | <i>PFN2</i>      | 11.99  | 11.53  | 11.49  |
| 1558050_at   | <i>EIF2B5</i>    | 3.12   | 3      | 3      |
| 1562775_at   | <i>NUDT12</i>    | 2.885  | 2.765  | 2.765  |
| 1562973_at   | <i>NA</i>        | 2.9    | 2.78   | 2.78   |
| 201524_x_at  | <i>UBE2N</i>     | 10.465 | 10.055 | 10.045 |
| 234011_at    | <i>MGC16384</i>  | 2.62   | 2.52   | 2.52   |
| 224520_s_at  | <i>BEST3</i>     | 2.67   | 2.57   | 2.57   |
| 205292_s_at  | <i>HNRPA2B1</i>  | 13.965 | 13.415 | 13.405 |
| 242802_x_at  | <i>DTNA</i>      | 3.07   | 2.95   | 2.95   |
| 1561728_a_at | <i>LOC400238</i> | 2.85   | 2.73   | 2.73   |
| 214853_s_at  | <i>SHC1</i>      | 11.62  | 11.15  | 11.17  |
| 241402_at    | <i>TSEN54</i>    | 3.435  | 3.295  | 3.295  |
| 236617_at    | <i>WWOX</i>      | 2.37   | 2.27   | 2.27   |
| 205312_at    | <i>SPI1</i>      | 2.68   | 2.58   | 2.58   |
| 219536_s_at  | <i>ZFP64</i>     | 3.835  | 3.685  | 3.675  |
| 212376_s_at  | <i>EP400</i>     | 6.435  | 6.185  | 6.175  |
| 1570213_at   | <i>NA</i>        | 2.645  | 2.545  | 2.545  |
| 214705_at    | <i>INADL</i>     | 3.06   | 2.94   | 2.94   |
| 241220_at    | <i>KIAA1641</i>  | 2.91   | 2.8    | 2.79   |
| 208123_at    | <i>KCNB2</i>     | 2.685  | 2.585  | 2.575  |
| 1557890_at   | <i>LOC729178</i> | 3.28   | 3.15   | 3.16   |
| 1552344_s_at | <i>CNOT7</i>     | 4.2    | 4.04   | 4.04   |
| 222258_s_at  | <i>SH3BP4</i>    | 11.205 | 10.745 | 10.795 |

|              |                      |        |        |        |
|--------------|----------------------|--------|--------|--------|
| 226655_at    | <i>NA</i>            | 2.49   | 2.39   | 2.39   |
| 222456_s_at  | <i>LIMAI</i>         | 2.775  | 2.675  | 2.665  |
| 215597_x_at  | <i>MYST4</i>         | 2.96   | 2.85   | 2.84   |
| 218921_at    | <i>SIGIRR</i>        | 2.615  | 2.515  | 2.515  |
| 239244_at    | <i>NA</i>            | 2.755  | 2.655  | 2.655  |
| 1557593_at   | <i>SPAG17</i>        | 2.945  | 2.825  | 2.835  |
| 1552825_at   | <i>ZNF396</i>        | 2.72   | 2.62   | 2.62   |
| 1560915_at   | <i>DPY19L1</i>       | 2.67   | 2.57   | 2.57   |
| 236510_at    | <i>TRIM26</i>        | 2.5    | 2.4    | 2.4    |
| 1561612_at   | <i>NA</i>            | 2.6    | 2.5    | 2.5    |
| 244256_at    | <i>CACNA1E</i>       | 2.995  | 2.875  | 2.875  |
| 238378_at    | <i>NA</i>            | 2.825  | 2.725  | 2.715  |
| 237947_at    | <i>GTF2IRD1</i>      | 2.42   | 2.32   | 2.32   |
| 224158_s_at  | <i>DKFZP779L1068</i> | 2.925  | 2.805  | 2.805  |
| 203290_at    | <i>HLA-DQA1</i>      | 2.475  | 2.375  | 2.375  |
| 239625_at    | <i>NA</i>            | 2.75   | 2.65   | 2.65   |
| 243617_at    | <i>LOC152485</i>     | 3.795  | 3.645  | 3.655  |
| 215877_at    | <i>C14orf56</i>      | 2.545  | 2.445  | 2.445  |
| 210242_x_at  | <i>MTHFS</i>         | 8.045  | 7.735  | 7.725  |
| 1569536_at   | <i>C14orf58</i>      | 3.305  | 3.185  | 3.185  |
| 215763_at    | <i>NA</i>            | 2.74   | 2.64   | 2.64   |
| 239150_at    | <i>FLJ44379</i>      | 2.695  | 2.595  | 2.595  |
| 244231_at    | <i>NA</i>            | 2.66   | 2.56   | 2.56   |
| 1552626_a_at | <i>TMEM163</i>       | 3.08   | 2.97   | 2.96   |
| 220455_at    | <i>SLC16A8</i>       | 3.785  | 3.635  | 3.645  |
| 207542_s_at  | <i>AQPI</i>          | 2.785  | 2.675  | 2.685  |
| 222336_at    | <i>C4orf34</i>       | 3.12   | 3      | 3      |
| 243436_at    | <i>NA</i>            | 2.79   | 2.69   | 2.69   |
| 232390_at    | <i>NCAM2</i>         | 2.795  | 2.685  | 2.695  |
| 233121_at    | <i>ZHX2</i>          | 2.895  | 2.785  | 2.775  |
| 226979_at    | <i>MAP3K2</i>        | 11.715 | 11.295 | 11.245 |



|             |                  |       |       |       |
|-------------|------------------|-------|-------|-------|
| 242486_at   | <i>CSNK1G1</i>   | 2.45  | 2.35  | 2.35  |
| 215428_at   | <i>TJP1</i>      | 2.815 | 2.715 | 2.715 |
| 49077_at    | <i>PPME1</i>     | 6.76  | 6.5   | 6.5   |
| 222023_at   | <i>AKAP13</i>    | 3.19  | 3.07  | 3.07  |
| 211948_x_at | <i>BAT2D1</i>    | 6.005 | 5.775 | 5.785 |
| 228525_at   | <i>NA</i>        | 3.31  | 3.19  | 3.19  |
| 1564029_at  | <i>USP49</i>     | 2.57  | 2.47  | 2.47  |
| 236292_at   | <i>RNF130</i>    | 4.325 | 4.155 | 4.175 |
| 238882_at   | <i>LOC387647</i> | 3.21  | 3.09  | 3.09  |
| 241390_at   | <i>UGT2B7</i>    | 2.915 | 2.815 | 2.805 |
| 1556954_at  | <i>LOC283854</i> | 3.065 | 2.945 | 2.945 |
| 1562722_at  | <i>FLJ40296</i>  | 3     | 2.88  | 2.89  |
| 233939_at   | <i>REXO1</i>     | 3.965 | 3.825 | 3.815 |
| 233396_s_at | <i>CSRP2BP</i>   | 3.3   | 3.18  | 3.17  |
| 1568749_at  | <i>NA</i>        | 2.695 | 2.595 | 2.595 |
| 210457_x_at | <i>HMGAI</i>     | 2.945 | 2.835 | 2.825 |
| 240360_at   | <i>BRD4</i>      | 3.045 | 2.925 | 2.935 |
| 201073_s_at | <i>SMARCC1</i>   | 2.51  | 2.41  | 2.41  |
| 228823_at   | <i>RASA4</i>     | 5.31  | 5.11  | 5.11  |
| 226816_s_at | <i>KIAA1143</i>  | 11.36 | 10.94 | 10.94 |
| 217266_at   | <i>tcag7.350</i> | 5.71  | 5.5   | 5.48  |
| 231307_at   | <i>PAGE5</i>     | 2.78  | 2.68  | 2.68  |
| 208383_s_at | <i>PCK1</i>      | 3.23  | 3.11  | 3.11  |
| 215532_x_at | <i>ZNF492</i>    | 2.915 | 2.815 | 2.805 |
| 203032_s_at | <i>FH</i>        | 2.78  | 2.68  | 2.68  |
| 1560717_at  | <i>NA</i>        | 2.915 | 2.815 | 2.815 |
| 220338_at   | <i>RALGPS2</i>   | 3     | 2.89  | 2.88  |
| 211457_at   | <i>GABARAPL3</i> | 3.045 | 2.925 | 2.925 |
| 230809_at   | <i>PCDHB14</i>   | 2.765 | 2.665 | 2.665 |
| 221888_at   | <i>CC2D1A</i>    | 2.79  | 2.69  | 2.69  |
| 229386_at   | <i>ID4</i>       | 2.65  | 2.55  | 2.55  |

|             |                  |        |        |        |
|-------------|------------------|--------|--------|--------|
| 204940_at   | <i>PLN</i>       | 3.045  | 2.935  | 2.925  |
| 210558_at   | <i>AKRIC4</i>    | 2.895  | 2.795  | 2.785  |
| 219215_s_at | <i>SLC39A4</i>   | 3.045  | 2.925  | 2.925  |
| 205940_at   | <i>MYH3</i>      | 2.67   | 2.57   | 2.57   |
| 214351_x_at | <i>RPL13</i>     | 11.095 | 10.685 | 10.695 |
| 1553974_at  | <i>LOC128977</i> | 3.155  | 3.045  | 3.035  |
| 1562817_at  | <i>NA</i>        | 3.075  | 2.965  | 2.955  |
| 243795_s_at | <i>LOC440900</i> | 2.97   | 2.87   | 2.86   |
| 1562373_at  | <i>ITPR1</i>     | 2.56   | 2.46   | 2.46   |
| 224431_s_at | <i>SUV420H2</i>  | 4.89   | 4.71   | 4.71   |
| 218623_at   | <i>HMP19</i>     | 2.68   | 2.58   | 2.58   |
| 221869_at   | <i>GM632</i>     | 3.955  | 3.815  | 3.815  |
| 240448_at   | <i>KIAA0802</i>  | 2.885  | 2.785  | 2.785  |
| 1563690_at  | <i>PPP4R1</i>    | 3.075  | 2.965  | 2.955  |
| 221078_s_at | <i>KIAA1212</i>  | 4.51   | 4.35   | 4.34   |
| 240072_at   | <i>ASXL2</i>     | 2.655  | 2.555  | 2.555  |
| 224561_s_at | <i>MORF4L1</i>   | 12.6   | 12.16  | 12.13  |
| 207047_s_at | <i>CLCNKA</i>    | 2.74   | 2.64   | 2.64   |
| 1560347_at  | <i>NA</i>        | 2.6    | 2.5    | 2.5    |
| 234570_at   | <i>ZNF71</i>     | 3.28   | 3.16   | 3.16   |
| 222399_s_at | <i>TM9SF3</i>    | 11.215 | 10.795 | 10.825 |
| 236900_x_at | <i>LOC126661</i> | 8.49   | 8.18   | 8.2    |
| 226200_at   | <i>VARS2</i>     | 7.305  | 7.035  | 7.045  |
| 1557316_at  | <i>STK24</i>     | 2.875  | 2.775  | 2.775  |
| 244181_at   | <i>PIK3R1</i>    | 2.77   | 2.67   | 2.67   |
| 1569938_at  | <i>SIRT5</i>     | 3.07   | 2.96   | 2.95   |
| 222323_at   | <i>NA</i>        | 2.655  | 2.555  | 2.555  |
| 219617_at   | <i>C2orf34</i>   | 4.86   | 4.67   | 4.69   |
| 213331_s_at | <i>NEK1</i>      | 9.91   | 9.56   | 9.54   |
| 207669_at   | <i>KRT83</i>     | 2.585  | 2.485  | 2.485  |
| 1562142_at  | <i>SKIV2L2</i>   | 3.15   | 3.03   | 3.03   |

|              |                  |       |       |       |
|--------------|------------------|-------|-------|-------|
| 244594_x_at  | <i>KIAA0174</i>  | 3.065 | 2.955 | 2.945 |
| 1565549_at   | <i>NA</i>        | 2.885 | 2.785 | 2.785 |
| 241308_at    | <i>LOC729589</i> | 2.84  | 2.74  | 2.74  |
| 237151_s_at  | <i>MGC33657</i>  | 3.52  | 3.4   | 3.4   |
| 214567_s_at  | <i>XCL2</i>      | 2.765 | 2.665 | 2.665 |
| 239805_at    | <i>SLC13A2</i>   | 3.025 | 2.925 | 2.915 |
| 213339_at    | <i>KIAA0495</i>  | 3.055 | 2.945 | 2.955 |
| 239920_at    | <i>LOC728651</i> | 3.705 | 3.575 | 3.565 |
| 1553765_a_at | <i>KLHL32</i>    | 2.985 | 2.885 | 2.885 |
| 231536_at    | <i>TIAMI</i>     | 3.025 | 2.925 | 2.915 |
| 235604_x_at  | <i>ZNF493</i>    | 3.14  | 3.02  | 3.03  |
| 234462_at    | <i>NA</i>        | 2.83  | 2.73  | 2.73  |
| 207006_s_at  | <i>CCDC106</i>   | 3.18  | 3.06  | 3.06  |
| 227253_at    | <i>CP</i>        | 3.25  | 3.13  | 3.13  |
| 235145_at    | <i>ZBTB7B</i>    | 4.455 | 4.295 | 4.295 |
| 221870_at    | <i>EHD2</i>      | 9.61  | 9.27  | 9.27  |
| 1554704_at   | <i>ATP8B3</i>    | 2.83  | 2.73  | 2.73  |
| 207128_s_at  | <i>ZNF223</i>    | 4.435 | 4.275 | 4.275 |
| 240060_at    | <i>SLC26A1</i>   | 3.39  | 3.27  | 3.27  |
| 209269_s_at  | <i>SYK</i>       | 2.78  | 2.68  | 2.68  |
| 220345_at    | <i>LRRTM4</i>    | 2.84  | 2.74  | 2.74  |
| 233307_x_at  | <i>MGST3</i>     | 4.885 | 4.705 | 4.705 |
| 213981_at    | <i>COMT</i>      | 6.665 | 6.435 | 6.425 |
| 1562823_at   | <i>RORI</i>      | 3.015 | 2.915 | 2.915 |
| 220328_at    | <i>PHC3</i>      | 2.905 | 2.805 | 2.805 |
| 220976_s_at  | <i>KRTAPI-1</i>  | 3.075 | 2.975 | 2.965 |
| 244096_at    | <i>NA</i>        | 3.225 | 3.115 | 3.105 |
| 243863_at    | <i>ZCWPW2</i>    | 2.9   | 2.8   | 2.8   |
| 1560964_at   | <i>NA</i>        | 2.8   | 2.7   | 2.7   |
| 1566924_at   | <i>NA</i>        | 2.82  | 2.72  | 2.72  |
| 213257_at    | <i>SARM1</i>     | 5     | 4.82  | 4.82  |

|              |                  |       |       |       |
|--------------|------------------|-------|-------|-------|
| 237930_at    | <i>LOC441204</i> | 3.035 | 2.935 | 2.935 |
| 1559354_a at | <i>FLJ25476</i>  | 2.705 | 2.605 | 2.605 |
| 214299_at    | <i>TOP3A</i>     | 6.185 | 5.965 | 5.965 |
| 243760_at    | <i>LOC650794</i> | 5.625 | 5.435 | 5.415 |
| 215046_at    | <i>FLJ23861</i>  | 4.895 | 4.735 | 4.725 |
| 219174_at    | <i>IFT74</i>     | 8.455 | 8.155 | 8.185 |
| 211487_x at  | <i>RPS17</i>     | 13.99 | 13.51 | 13.51 |
| 1553978_at   | <i>MEF2B</i>     | 5.37  | 5.2   | 5.18  |
| 216719_s at  | <i>RAB11FIP4</i> | 3.02  | 2.92  | 2.92  |
| 239380_at    | <i>C5orf27</i>   | 3.02  | 2.92  | 2.92  |
| 1568691_at   | <i>NA</i>        | 3.71  | 3.58  | 3.59  |
| 243162_at    | <i>PBI</i>       | 3.285 | 3.165 | 3.165 |
| 237104_at    | <i>CTSS</i>      | 3.125 | 3.025 | 3.025 |
| 242791_at    | <i>FBXO3</i>     | 3.235 | 3.125 | 3.135 |
| 215948_x at  | <i>ZMYM5</i>     | 6.065 | 5.865 | 5.855 |
| 240702_at    | <i>HERC1</i>     | 2.885 | 2.785 | 2.785 |
| 240103_at    | <i>NA</i>        | 2.85  | 2.75  | 2.75  |
| 209767_s at  | <i>5-Sep</i>     | 3.295 | 3.175 | 3.175 |
| 242654_at    | <i>FANCC</i>     | 2.76  | 2.66  | 2.66  |
| 1569499_at   | <i>TFDP2</i>     | 2.99  | 2.89  | 2.89  |
| 232983_s at  | <i>SERGEF</i>    | 3.1   | 3     | 3     |
| 208860_s at  | <i>ATRX</i>      | 9.105 | 8.795 | 8.815 |
| 239306_at    | <i>C14orf93</i>  | 2.89  | 2.79  | 2.79  |
| 234040_at    | <i>HELLS</i>     | 2.88  | 2.78  | 2.78  |
| 1558561_at   | <i>HMI3</i>      | 2.95  | 2.85  | 2.85  |
| 215321_at    | <i>RPIB9</i>     | 3.115 | 3.015 | 3.015 |
| 219981_x at  | <i>ZNF587</i>    | 9.04  | 8.74  | 8.75  |
| 237756_at    | <i>KLHL23</i>    | 2.965 | 2.865 | 2.865 |
| 241860_at    | <i>STK17B</i>    | 2.82  | 2.72  | 2.72  |
| 236060_at    | <i>NA</i>        | 3.25  | 3.15  | 3.14  |
| 239667_at    | <i>SLC3A1</i>    | 3.12  | 3.02  | 3.02  |

|              |                  |        |        |        |
|--------------|------------------|--------|--------|--------|
| 204582_s_at  | <i>KLK3</i>      | 2.92   | 2.82   | 2.82   |
| 244244_at    | <i>CD300LG</i>   | 2.975  | 2.875  | 2.875  |
| 215565_at    | <i>DTNB</i>      | 2.94   | 2.84   | 2.84   |
| 218830_at    | <i>RPL26L1</i>   | 10.615 | 10.255 | 10.295 |
| 242825_at    | <i>PAP2D</i>     | 3.05   | 2.95   | 2.95   |
| 1566515_at   | <i>CWF19L2</i>   | 3.125  | 3.025  | 3.025  |
| 1569468_at   | <i>MGC26356</i>  | 3.01   | 2.91   | 2.91   |
| 207131_x_at  | <i>GGT1</i>      | 4.155  | 4.015  | 4.015  |
| 239585_at    | <i>NA</i>        | 3      | 2.9    | 2.9    |
| 209704_at    | <i>NA</i>        | 6.3    | 6.11   | 6.09   |
| 1559940_s_at | <i>FLJ16124</i>  | 3.17   | 3.07   | 3.07   |
| 240579_at    | <i>NAG</i>       | 3.055  | 2.955  | 2.955  |
| 205510_s_at  | <i>FLJ10038</i>  | 6.265  | 6.065  | 6.065  |
| 202682_s_at  | <i>USP4</i>      | 8.88   | 8.59   | 8.61   |
| 1565743_at   | <i>PFAAP5</i>    | 3.09   | 2.99   | 2.99   |
| 208540_x_at  | <i>SI00A11</i>   | 5.895  | 5.725  | 5.705  |
| 227713_at    | <i>KATNAL1</i>   | 9.46   | 9.17   | 9.15   |
| 208584_at    | <i>SNCG</i>      | 3.455  | 3.355  | 3.345  |
| 208857_s_at  | <i>PCMT1</i>     | 11.33  | 10.98  | 10.97  |
| 1569422_at   | <i>FAM129C</i>   | 3.345  | 3.245  | 3.245  |
| 1559061_at   | <i>LOC253962</i> | 4.075  | 3.955  | 3.945  |
| 243414_at    | <i>PPIL2</i>     | 5.06   | 4.9    | 4.9    |
| 240918_at    | <i>NA</i>        | 3.075  | 2.975  | 2.975  |
| 231794_at    | <i>CTLA4</i>     | 3.1    | 3      | 3      |
| 211675_s_at  | <i>MDFIC</i>     | 12.24  | 11.88  | 11.84  |
| 1558176_at   | <i>LOC96610</i>  | 3.52   | 3.41   | 3.42   |
| 221098_x_at  | <i>UTP14A</i>    | 3.535  | 3.435  | 3.425  |
| 217664_at    | <i>JMJD2B</i>    | 3.05   | 2.95   | 2.95   |
| 200611_s_at  | <i>WDR1</i>      | 9.75   | 9.44   | 9.46   |
| 206015_s_at  | <i>FOXJ3</i>     | 10.54  | 10.23  | 10.21  |
| 200949_x_at  | <i>RPS20</i>     | 10.96  | 10.61  | 10.63  |

|              |                 |        |        |        |
|--------------|-----------------|--------|--------|--------|
| 243219_x_at  | <i>NA</i>       | 3.195  | 3.095  | 3.095  |
| 222200_s_at  | <i>BSDC1</i>    | 6.69   | 6.49   | 6.49   |
| 220564_at    | <i>C10orf59</i> | 3.47   | 3.37   | 3.37   |
| 200855_at    | <i>TTC19</i>    | 3.38   | 3.28   | 3.28   |
| 225052_at    | <i>MGC14327</i> | 8.165  | 7.925  | 7.925  |
| 236737_at    | <i>C17orf56</i> | 3.65   | 3.54   | 3.55   |
| 201176_s_at  | <i>ARCNI</i>    | 11.555 | 11.195 | 11.235 |
| 241507_x_at  | <i>NA</i>       | 3.33   | 3.23   | 3.23   |
| 214338_at    | <i>DNAJB12</i>  | 5.775  | 5.615  | 5.605  |
| 225549_at    | <i>NA</i>       | 10.505 | 10.215 | 10.195 |
| 241054_at    | <i>NA</i>       | 3.39   | 3.29   | 3.29   |
| 201960_s_at  | <i>MYCBP2</i>   | 12.025 | 11.675 | 11.695 |
| 1562849_at   | <i>SPECC1</i>   | 3.975  | 3.855  | 3.855  |
| 208286_x_at  | <i>POU5F1</i>   | 5.795  | 5.645  | 5.625  |
| 209253_at    | <i>SORBS3</i>   | 7.27   | 7.07   | 7.06   |
| 1559960_x_at | <i>NA</i>       | 4.055  | 3.935  | 3.945  |
| 218117_at    | <i>RBX1</i>     | 8.46   | 8.22   | 8.22   |
| 217866_at    | <i>FLJ12529</i> | 7.04   | 6.85   | 6.84   |
| 201569_s_at  | <i>SAMM50</i>   | 8.965  | 8.715  | 8.725  |
| 228401_at    | <i>ATAD2</i>    | 7.2    | 7.01   | 6.99   |
| 224747_at    | <i>UBE2Q2</i>   | 11.49  | 11.17  | 11.17  |
| 204765_at    | <i>ARHGEF5</i>  | 6.265  | 6.085  | 6.095  |
| 235750_at    | <i>C17orf65</i> | 4.185  | 4.065  | 4.075  |
| 226669_at    | <i>USP42</i>    | 8.825  | 8.595  | 8.605  |
| 212449_s_at  | <i>LYPLA1</i>   | 10.88  | 10.59  | 10.61  |
| 213916_at    | <i>ZNF20</i>    | 5.65   | 5.51   | 5.51   |
| 239706_x_at  | <i>PSG1</i>     | 4.365  | 4.265  | 4.255  |
| 222042_x_at  | <i>RKHD1</i>    | 4.375  | 4.275  | 4.265  |
| 225324_at    | <i>CRLS1</i>    | 10     | 9.76   | 9.76   |
| 218364_at    | <i>LRRFIP2</i>  | 9.79   | 9.56   | 9.55   |
| 222726_s_at  | <i>EXOC5</i>    | 7.085  | 6.925  | 6.925  |

|              |                  |        |        |        |
|--------------|------------------|--------|--------|--------|
| 202184_s_at  | <i>NUP133</i>    | 9.41   | 9.2    | 9.18   |
| 200011_s_at  | <i>ARF3</i>      | 8.58   | 8.37   | 8.39   |
| 205762_s_at  | <i>DUS4L</i>     | 4.205  | 4.105  | 4.105  |
| 235587_at    | <i>LOC202781</i> | 5.42   | 5.3    | 5.3    |
| 213508_at    | <i>C14orf147</i> | 7.77   | 7.59   | 7.59   |
| 201816_s_at  | <i>GBAS</i>      | 8.265  | 8.075  | 8.095  |
| 224439_x_at  | <i>RNF7</i>      | 9.265  | 9.065  | 9.065  |
| 233868_x_at  | <i>ADAM33</i>    | 8.58   | 8.4    | 8.4    |
| 1563745_a_at | <i>LOC283050</i> | 5.315  | 5.205  | 5.195  |
| 201244_s_at  | <i>RAF1</i>      | 8.83   | 8.64   | 8.65   |
| 227308_x_at  | <i>LTBP3</i>     | 5.07   | 4.97   | 4.97   |
| 223544_at    | <i>TMEM79</i>    | 4.97   | 4.87   | 4.87   |
| 219074_at    | <i>TMEM34</i>    | 9.11   | 8.94   | 8.92   |
| 238719_at    | <i>NA</i>        | 8.185  | 8.045  | 8.035  |
| 219097_x_at  | <i>C19orf42</i>  | 11.36  | 11.16  | 11.16  |
| 214532_x_at  | <i>POU5F1P1</i>  | 6.315  | 6.195  | 6.205  |
| 223155_at    | <i>HDHD2</i>     | 9.915  | 9.755  | 9.745  |
| 222733_x_at  | <i>D21S2056E</i> | 5.735  | 5.635  | 5.635  |
| 222848_at    | <i>CENPK</i>     | 7.705  | 7.575  | 7.585  |
| 226354_at    | <i>LACTB</i>     | 9.955  | 9.795  | 9.795  |
| 201966_at    | <i>NDUFS2</i>    | 9.765  | 9.605  | 9.605  |
| 224726_at    | <i>MIB1</i>      | 9.58   | 9.43   | 9.42   |
| 224830_at    | <i>NUDT21</i>    | 8.975  | 8.855  | 8.855  |
| 200733_s_at  | <i>PTP4A1</i>    | 11.255 | 11.115 | 11.115 |
| 222548_s_at  | <i>MAP4K4</i>    | 11.225 | 11.125 | 11.125 |
| 222231_s_at  | <i>LRRC59</i>    | 10.715 | 10.835 | 10.835 |
| 201552_at    | <i>LAMP1</i>     | 12.49  | 12.64  | 12.65  |
| 226210_s_at  | <i>MEG3</i>      | 11.685 | 11.845 | 11.835 |
| 227847_at    | <i>EPM2AIP1</i>  | 8.665  | 8.785  | 8.795  |
| 227027_at    | <i>NA</i>        | 9.4    | 9.53   | 9.55   |
| 200816_s_at  | <i>PAFAH1B1</i>  | 11.44  | 11.61  | 11.62  |

|             |                 |        |        |        |
|-------------|-----------------|--------|--------|--------|
| 222992_s_at | <i>NDUFB9</i>   | 8.54   | 8.68   | 8.67   |
| 203834_s_at | <i>TGOLN2</i>   | 5.65   | 5.75   | 5.75   |
| 235078_at   | <i>NBEAL1</i>   | 9.05   | 9.22   | 9.24   |
| 207358_x_at | <i>MACF1</i>    | 9.915  | 10.105 | 10.125 |
| 223361_at   | <i>C6orf115</i> | 8.975  | 9.165  | 9.155  |
| 225210_s_at | <i>RPS6KA2</i>  | 9.115  | 9.315  | 9.305  |
| 203405_at   | <i>DSCR2</i>    | 9.045  | 9.235  | 9.245  |
| 213838_at   | <i>NOL7</i>     | 8.605  | 8.785  | 8.795  |
| 235413_at   | <i>GGCX</i>     | 7.525  | 7.685  | 7.695  |
| 214305_s_at | <i>SF3B1</i>    | 9.475  | 9.685  | 9.705  |
| 209849_s_at | <i>RAD51C</i>   | 6.34   | 6.48   | 6.48   |
| 208841_s_at | <i>G3BP2</i>    | 11.4   | 11.66  | 11.66  |
| 213311_s_at | <i>TCF25</i>    | 7.79   | 7.97   | 7.97   |
| 53912_at    | <i>SNX11</i>    | 6.085  | 6.225  | 6.225  |
| 212158_at   | <i>SDC2</i>     | 12.235 | 12.545 | 12.525 |
| 239406_at   | <i>ZNF193</i>   | 4.155  | 4.255  | 4.255  |
| 210524_x_at | <i>NA</i>       | 4.11   | 4.21   | 4.21   |
| 202664_at   | <i>WIPF1</i>    | 10.835 | 11.115 | 11.115 |
| 221922_at   | <i>GPSM2</i>    | 7.87   | 8.08   | 8.06   |
| 233268_s_at | <i>SELENBP1</i> | 5.34   | 5.48   | 5.48   |
| 211933_s_at | <i>HNRPA3</i>   | 11.64  | 11.95  | 11.93  |
| 204656_at   | <i>SHB</i>      | 5.395  | 5.535  | 5.545  |
| 219361_s_at | <i>ISG20L1</i>  | 7.815  | 8.015  | 8.025  |
| 226534_at   | <i>KITLG</i>    | 11.54  | 11.83  | 11.86  |
| 225554_s_at | <i>ANAPC7</i>   | 7.43   | 7.64   | 7.62   |
| 217913_at   | <i>VPS4A</i>    | 8.195  | 8.415  | 8.425  |
| 221743_at   | <i>CUGBP1</i>   | 11.935 | 12.265 | 12.255 |
| 203244_at   | <i>PEX5</i>     | 7.635  | 7.865  | 7.845  |
| 208726_s_at | <i>EIF2S2</i>   | 11.835 | 12.175 | 12.145 |
| 227331_at   | <i>ITGB7</i>    | 3.985  | 4.095  | 4.105  |
| 204125_at   | <i>NDUFAF1</i>  | 8.98   | 9.24   | 9.23   |



|             |                 |       |       |       |
|-------------|-----------------|-------|-------|-------|
| 228348_at   | <i>LINS1</i>    | 8.075 | 8.315 | 8.285 |
| 212297_at   | <i>ATP13A3</i>  | 12.78 | 13.16 | 13.12 |
| 203644_s_at | <i>MON1B</i>    | 4.17  | 4.29  | 4.29  |
| 224184_s_at | <i>BOC</i>      | 6.31  | 6.49  | 6.5   |
| 222127_s_at | <i>EXOC1</i>    | 10.33 | 10.64 | 10.62 |
| 1558738_at  | <i>NOL3</i>     | 4.435 | 4.565 | 4.575 |
| 201480_s_at | <i>SUPT5H</i>   | 5.2   | 5.36  | 5.37  |
| 224841_x_at | <i>CENPL</i>    | 9.245 | 9.545 | 9.545 |
| 236993_at   | <i>NA</i>       | 2.925 | 3.025 | 3.025 |
| 219039_at   | <i>SEMA4C</i>   | 6.375 | 6.585 | 6.575 |
| 213221_s_at | <i>SNFILK2</i>  | 7.615 | 7.845 | 7.865 |
| 204246_s_at | <i>DCTN3</i>    | 8.745 | 9.045 | 9.045 |
| 238879_at   | <i>NA</i>       | 7.355 | 7.615 | 7.585 |
| 236629_at   | <i>C1orf69</i>  | 3.375 | 3.495 | 3.495 |
| 218524_at   | <i>E4F1</i>     | 5.505 | 5.695 | 5.685 |
| 202845_s_at | <i>RALBP1</i>   | 8.075 | 8.355 | 8.355 |
| 46256_at    | <i>SPSB3</i>    | 5.495 | 5.675 | 5.685 |
| 223072_s_at | <i>WBPI</i>     | 5.955 | 6.165 | 6.145 |
| 218178_s_at | <i>CHMP1B</i>   | 6.065 | 6.275 | 6.285 |
| 231045_x_at | <i>CTNND1</i>   | 7.655 | 7.925 | 7.915 |
| 230524_at   | <i>MPI</i>      | 3.805 | 3.945 | 3.935 |
| 202605_at   | <i>GUSB</i>     | 8.5   | 8.79  | 8.81  |
| 205294_at   | <i>BAIAP2</i>   | 5.24  | 5.43  | 5.41  |
| 214789_x_at | <i>SFRS2B</i>   | 10.11 | 10.45 | 10.49 |
| 235923_at   | <i>VTG1A</i>    | 3.525 | 3.645 | 3.645 |
| 212551_at   | <i>CAP2</i>     | 7.015 | 7.265 | 7.285 |
| 204218_at   | <i>C11orf51</i> | 4.83  | 5.01  | 5     |
| 227541_at   | <i>WDR20</i>    | 6.865 | 7.125 | 7.115 |
| 202565_s_at | <i>SVIL</i>     | 10.98 | 11.38 | 11.38 |
| 201479_at   | <i>DKCI</i>     | 9.65  | 10.03 | 9.99  |
| 1558152_at  | <i>TSPAN4</i>   | 8.455 | 8.785 | 8.755 |

|              |                 |        |        |        |
|--------------|-----------------|--------|--------|--------|
| 218695_at    | <i>EXOSC4</i>   | 4.975  | 5.165  | 5.145  |
| 240032_at    | <i>NA</i>       | 3.2    | 3.32   | 3.32   |
| 223555_at    | <i>GON4L</i>    | 4.28   | 4.44   | 4.44   |
| 203090_at    | <i>SDF2</i>     | 6.75   | 7.02   | 7      |
| 233955_x_at  | <i>CXXC5</i>    | 10.245 | 10.655 | 10.625 |
| 226276_at    | <i>TMEM167</i>  | 9.16   | 9.51   | 9.52   |
| 225009_at    | <i>CMTM4</i>    | 8.525  | 8.865  | 8.855  |
| 209064_x_at  | <i>PAIP1</i>    | 8.435  | 8.755  | 8.755  |
| 218390_s_at  | <i>C10orf84</i> | 4.155  | 4.315  | 4.315  |
| 235232_at    | <i>NA</i>       | 8.885  | 9.255  | 9.235  |
| 225455_at    | <i>TADAIL</i>   | 4.8    | 5      | 4.99   |
| 202042_at    | <i>HARS</i>     | 8.635  | 8.965  | 8.985  |
| 226697_at    | <i>FAM114A1</i> | 8.795  | 9.165  | 9.135  |
| 218267_at    | <i>CINP</i>     | 5.29   | 5.51   | 5.51   |
| 220789_s_at  | <i>TBRG4</i>    | 5.41   | 5.62   | 5.64   |
| 220042_x_at  | <i>HIVEP3</i>   | 4.135  | 4.315  | 4.305  |
| 208855_s_at  | <i>STK24</i>    | 12.775 | 13.295 | 13.325 |
| 212716_s_at  | <i>EIF3S12</i>  | 10.03  | 10.47  | 10.43  |
| 225267_at    | <i>KPNA4</i>    | 10.575 | 11.015 | 11.015 |
| 222471_s_at  | <i>KCMF1</i>    | 8.075  | 8.395  | 8.435  |
| 208743_s_at  | <i>YWHAB</i>    | 8.965  | 9.355  | 9.345  |
| 230905_at    | <i>ZDHHC4</i>   | 3.13   | 3.27   | 3.26   |
| 202747_s_at  | <i>ITM2A</i>    | 2.485  | 2.595  | 2.585  |
| 201322_at    | <i>ATP5B</i>    | 10.185 | 10.665 | 10.615 |
| 200829_x_at  | <i>ZNF207</i>   | 10.42  | 10.9   | 10.87  |
| 1554482_a_at | <i>SAR1B</i>    | 3.1    | 3.24   | 3.24   |
| 219108_x_at  | <i>DDX27</i>    | 9.42   | 9.85   | 9.87   |
| 213242_x_at  | <i>KIAA0284</i> | 7.53   | 7.88   | 7.86   |
| 223396_at    | <i>TMEM60</i>   | 9.27   | 9.71   | 9.68   |
| 236329_at    | <i>FLJ33996</i> | 2.315  | 2.415  | 2.425  |
| 209456_s_at  | <i>FBXW11</i>   | 5.01   | 5.24   | 5.26   |

|             |                  |        |        |        |
|-------------|------------------|--------|--------|--------|
| 218070_s_at | <i>GMPPA</i>     | 6.185  | 6.475  | 6.455  |
| 202758_s_at | <i>RFXANK</i>    | 3.575  | 3.745  | 3.735  |
| 225334_at   | <i>AS3MT</i>     | 9.625  | 10.105 | 10.065 |
| 233647_s_at | <i>CDADC1</i>    | 9.25   | 9.71   | 9.67   |
| 213391_at   | <i>DPY19L4</i>   | 8.85   | 9.26   | 9.28   |
| 230230_at   | <i>NA</i>        | 4.195  | 4.395  | 4.405  |
| 209462_at   | <i>APLP1</i>     | 3.29   | 3.45   | 3.45   |
| 208614_s_at | <i>FLNB</i>      | 8.055  | 8.475  | 8.435  |
| 206042_x_at | <i>SNURF</i>     | 6.445  | 6.755  | 6.775  |
| 225127_at   | <i>TMEM181</i>   | 10.825 | 11.375 | 11.345 |
| 231772_x_at | <i>CENPH</i>     | 2.86   | 3      | 3      |
| 209430_at   | <i>BTAF1</i>     | 9.865  | 10.335 | 10.365 |
| 210025_s_at | <i>CARD10</i>    | 3.025  | 3.175  | 3.185  |
| 233088_at   | <i>XYLT1</i>     | 2.285  | 2.405  | 2.405  |
| 231205_at   | <i>DDEF1</i>     | 3.735  | 3.915  | 3.925  |
| 224698_at   | <i>FAM62B</i>    | 9.7    | 10.18  | 10.19  |
| 227622_at   | <i>PCF11</i>     | 7.16   | 7.52   | 7.52   |
| 202961_s_at | <i>ATP5J2</i>    | 9.1    | 9.58   | 9.54   |
| 226977_at   | <i>LOC492311</i> | 10.67  | 11.24  | 11.18  |
| 241348_at   | <i>ZNF654</i>    | 7.79   | 8.17   | 8.21   |
| 212085_at   | <i>SLC25A6</i>   | 9.785  | 10.315 | 10.265 |
| 209058_at   | <i>EDF1</i>      | 10.285 | 10.805 | 10.845 |
| 223374_s_at | <i>B3GALNT1</i>  | 6.675  | 7.035  | 7.005  |
| 209717_at   | <i>EVI5</i>      | 8.695  | 9.125  | 9.175  |
| 206958_s_at | <i>UPF3A</i>     | 7.905  | 8.305  | 8.335  |
| 229483_at   | <i>UBE2H</i>     | 3.06   | 3.21   | 3.23   |
| 209317_at   | <i>POLR1C</i>    | 7.95   | 8.39   | 8.35   |
| 210296_s_at | <i>PXMP3</i>     | 6.81   | 7.18   | 7.15   |
| 243309_at   | <i>FLJ27352</i>  | 6.02   | 6.32   | 6.35   |
| 203944_x_at | <i>BTN2A1</i>    | 8.805  | 9.255  | 9.285  |
| 230167_at   | <i>ADAMTS14</i>  | 4.95   | 5.2    | 5.22   |

|             |                  |       |       |       |
|-------------|------------------|-------|-------|-------|
| 209174_s_at | <i>QRICHI</i>    | 8.92  | 9.38  | 9.42  |
| 223258_s_at | <i>KIAA1333</i>  | 5.085 | 5.345 | 5.375 |
| 214820_at   | <i>BRWD1</i>     | 5.3   | 5.58  | 5.58  |
| 226793_at   | <i>TCP11L1</i>   | 6.64  | 7.01  | 6.98  |
| 223989_s_at | <i>REXO2</i>     | 7.88  | 8.28  | 8.32  |
| 217748_at   | <i>ADIPOR1</i>   | 7.45  | 7.87  | 7.83  |
| 218160_at   | <i>NDUFA8</i>    | 9.77  | 10.28 | 10.31 |
| 201046_s_at | <i>RAD23A</i>    | 7.9   | 8.34  | 8.3   |
| 209770_at   | <i>BTN3A1</i>    | 6.28  | 6.6   | 6.64  |
| 204076_at   | <i>ENTPD4</i>    | 10.35 | 10.91 | 10.94 |
| 224920_x_at | <i>MYADM</i>     | 6.925 | 7.305 | 7.305 |
| 235233_s_at | <i>NA</i>        | 8.13  | 8.59  | 8.59  |
| 229433_at   | <i>RBM26</i>     | 4.765 | 5.035 | 5.015 |
| 227908_at   | <i>TBC1D24</i>   | 8.385 | 8.875 | 8.825 |
| 202555_s_at | <i>MYLK</i>      | 10.04 | 10.58 | 10.62 |
| 208925_at   | <i>CLDND1</i>    | 8.325 | 8.805 | 8.775 |
| 206592_s_at | <i>AP3D1</i>     | 9.98  | 10.57 | 10.51 |
| 219459_at   | <i>POLR3B</i>    | 6.86  | 7.22  | 7.26  |
| 210564_x_at | <i>CFLAR</i>     | 5.235 | 5.515 | 5.545 |
| 213106_at   | <i>ATP8A1</i>    | 2.82  | 2.98  | 2.98  |
| 209055_s_at | <i>CDC5L</i>     | 2.625 | 2.775 | 2.765 |
| 238075_at   | <i>CHEK1</i>     | 7.63  | 8.05  | 8.09  |
| 213700_s_at | <i>PKM2</i>      | 5.955 | 6.295 | 6.295 |
| 208906_at   | <i>BSCL2</i>     | 3.45  | 3.64  | 3.66  |
| 202401_s_at | <i>SRF</i>       | 7.175 | 7.575 | 7.615 |
| 212753_at   | <i>PCGF3</i>     | 8.72  | 9.21  | 9.24  |
| 212205_at   | <i>H2AFV</i>     | 9.42  | 9.97  | 9.95  |
| 1569973_at  | <i>LOC441220</i> | 3.245 | 3.435 | 3.445 |
| 204033_at   | <i>TRIP13</i>    | 4.82  | 5.09  | 5.12  |
| 1557409_at  | <i>SPG7</i>      | 3.505 | 3.715 | 3.705 |
| 228148_at   | <i>ZNF584</i>    | 4.12  | 4.35  | 4.37  |

|              |                 |        |        |        |
|--------------|-----------------|--------|--------|--------|
| 204173_at    | <i>MYL6B</i>    | 7.19   | 7.59   | 7.63   |
| 227255_at    | <i>PDIK1L</i>   | 5.575  | 5.915  | 5.905  |
| 1552301_a_at | <i>CORO6</i>    | 2.74   | 2.9    | 2.9    |
| 221782_at    | <i>DNAJC10</i>  | 8.585  | 9.115  | 9.095  |
| 202721_s_at  | <i>GFPT1</i>    | 6.27   | 6.66   | 6.64   |
| 213115_at    | <i>ATG4A</i>    | 6.32   | 6.7    | 6.71   |
| 226406_at    | <i>C18orf25</i> | 8.96   | 9.52   | 9.49   |
| 212789_at    | <i>NCAPD3</i>   | 4.95   | 5.25   | 5.25   |
| 219767_s_at  | <i>CRYZL1</i>   | 7.285  | 7.755  | 7.705  |
| 222759_at    | <i>SUV420H1</i> | 5.995  | 6.365  | 6.355  |
| 200069_at    | <i>SART3</i>    | 7.695  | 8.165  | 8.175  |
| 223187_s_at  | <i>ORMDL1</i>   | 7.645  | 8.115  | 8.125  |
| 205677_s_at  | <i>DLEU1</i>    | 7.32   | 7.77   | 7.79   |
| 228138_at    | <i>ZSCAN25</i>  | 4.395  | 4.685  | 4.655  |
| 236192_at    | <i>FNTA</i>     | 9.065  | 9.595  | 9.665  |
| 200769_s_at  | <i>MAT2A</i>    | 2.325  | 2.475  | 2.465  |
| 218308_at    | <i>TACC3</i>    | 4.14   | 4.39   | 4.41   |
| 209378_s_at  | <i>KIAA1128</i> | 6.405  | 6.805  | 6.815  |
| 201723_s_at  | <i>GALNT1</i>   | 7.53   | 7.99   | 8.03   |
| 201460_at    | <i>MAPKAPK2</i> | 7.705  | 8.215  | 8.165  |
| 231019_x_at  | <i>STK11</i>    | 6.015  | 6.385  | 6.415  |
| 227930_at    | <i>EIF2C4</i>   | 6.79   | 7.22   | 7.24   |
| 201823_s_at  | <i>RNF14</i>    | 7.86   | 8.38   | 8.34   |
| 226279_at    | <i>PRSS23</i>   | 13.125 | 13.975 | 13.965 |
| 202196_s_at  | <i>DKK3</i>     | 8.865  | 9.415  | 9.465  |
| 217794_at    | <i>PRR13</i>    | 7.06   | 7.54   | 7.5    |
| 221069_s_at  | <i>CCDC44</i>   | 6.26   | 6.67   | 6.65   |
| 65884_at     | <i>MAN1B1</i>   | 6.465  | 6.865  | 6.905  |
| 204479_at    | <i>OSTF1</i>    | 7.56   | 8.04   | 8.08   |
| 238165_at    | <i>PDZRN3</i>   | 3.185  | 3.405  | 3.395  |
| 221881_s_at  | <i>CLIC4</i>    | 6.26   | 6.66   | 6.69   |

|             |                 |       |        |        |
|-------------|-----------------|-------|--------|--------|
| 54051_at    | <i>PKNOX1</i>   | 7.32  | 7.83   | 7.78   |
| 208101_s_at | <i>URMI</i>     | 5.03  | 5.36   | 5.38   |
| 207791_s_at | <i>RAB1A</i>    | 9.475 | 10.075 | 10.145 |
| 201013_s_at | <i>PAICS</i>    | 8.65  | 9.22   | 9.24   |
| 209906_at   | <i>C3AR1</i>    | 2.555 | 2.735  | 2.725  |
| 225558_at   | <i>GIT2</i>     | 8.36  | 8.9    | 8.94   |
| 228503_at   | <i>NA</i>       | 4.595 | 4.905  | 4.915  |
| 208972_s_at | <i>ATP5G1</i>   | 8.59  | 9.18   | 9.16   |
| 203403_s_at | <i>RNF6</i>     | 10.34 | 11.08  | 11     |
| 212747_at   | <i>ANKS1A</i>   | 7.67  | 8.2    | 8.19   |
| 230047_at   | <i>FLJ32810</i> | 4.515 | 4.815  | 4.825  |
| 210559_s_at | <i>CDC2</i>     | 5.485 | 5.865  | 5.865  |
| 201527_at   | <i>ATP6V1F</i>  | 8.42  | 9.01   | 8.99   |
| 36129_at    | <i>RUTBC1</i>   | 8.15  | 8.73   | 8.69   |
| 201649_at   | <i>UBE2L6</i>   | 5.77  | 6.17   | 6.16   |
| 225643_at   | <i>C14orf32</i> | 9.205 | 9.855  | 9.825  |
| 212908_at   | <i>DNAJC16</i>  | 8.205 | 8.785  | 8.755  |
| 200978_at   | <i>MDHI</i>     | 9.625 | 10.325 | 10.275 |
| 211096_at   | <i>PBX2</i>     | 2.57  | 2.75   | 2.75   |
| 218286_s_at | <i>RNF7</i>     | 8.085 | 8.635  | 8.655  |
| 221024_s_at | <i>SLC2A10</i>  | 9.885 | 10.565 | 10.605 |
| 218156_s_at | <i>TSR1</i>     | 5.16  | 5.53   | 5.51   |
| 201732_s_at | <i>CLCN3</i>    | 7.665 | 8.235  | 8.185  |
| 225179_at   | <i>NA</i>       | 8.71  | 9.35   | 9.31   |
| 219053_s_at | <i>VPS37C</i>   | 8.715 | 9.295  | 9.375  |
| 218119_at   | <i>TIMM23</i>   | 5.59  | 5.99   | 5.99   |
| 226795_at   | <i>LRCH1</i>    | 6.925 | 7.425  | 7.415  |
| 203773_x_at | <i>BLVRA</i>    | 8.555 | 9.155  | 9.185  |
| 209751_s_at | <i>SEDLP</i>    | 6.4   | 6.89   | 6.83   |
| 202777_at   | <i>SHOC2</i>    | 9.44  | 10.11  | 10.13  |
| 224036_s_at | <i>LMBR1</i>    | 6.6   | 7.06   | 7.1    |

|              |                 |        |        |        |
|--------------|-----------------|--------|--------|--------|
| 1554224_at   | <i>NA</i>       | 2.81   | 3.02   | 3.01   |
| 209566_at    | <i>INSIG2</i>   | 9.075  | 9.745  | 9.725  |
| 223020_at    | <i>CLPTMIL</i>  | 7.9    | 8.46   | 8.5    |
| 221472_at    | <i>SERINC3</i>  | 9.94   | 10.7   | 10.63  |
| 225452_at    | <i>PPARBP</i>   | 7.53   | 8.12   | 8.06   |
| 244599_at    | <i>ITGA4</i>    | 3.065  | 3.285  | 3.295  |
| 222976_s_at  | <i>TPM3</i>     | 11.31  | 12.18  | 12.12  |
| 225881_at    | <i>SLC35B4</i>  | 8.83   | 9.46   | 9.51   |
| 226883_at    | <i>NA</i>       | 10.145 | 10.925 | 10.885 |
| 1553810_a_at | <i>KIAA1524</i> | 3.44   | 3.69   | 3.71   |
| 223879_s_at  | <i>OXR1</i>     | 2.785  | 2.985  | 2.995  |
| 213370_s_at  | <i>SFMBT1</i>   | 4.675  | 5.025  | 5.035  |
| 206764_x_at  | <i>MPPE1</i>    | 4.875  | 5.245  | 5.235  |
| 227639_at    | <i>PIGK</i>     | 8.915  | 9.555  | 9.635  |
| 231576_at    | <i>ETNK1</i>    | 9.345  | 10.005 | 10.085 |
| 211573_x_at  | <i>TGM2</i>     | 2.34   | 2.52   | 2.52   |
| 200905_x_at  | <i>HLA-E</i>    | 9.5    | 10.2   | 10.25  |
| 225264_at    | <i>RARS2</i>    | 8.845  | 9.495  | 9.545  |
| 221695_s_at  | <i>MAP3K2</i>   | 4.62   | 4.97   | 4.99   |
| 224951_at    | <i>C12orf62</i> | 8.795  | 9.485  | 9.455  |
| 211143_x_at  | <i>NR4A1</i>    | 4.835  | 5.225  | 5.195  |
| 201226_at    | <i>NDUFB8</i>   | 7.465  | 8.055  | 8.025  |
| 221875_x_at  | <i>HLA-F</i>    | 7.605  | 8.215  | 8.185  |
| 202491_s_at  | <i>IKBKAP</i>   | 8.56   | 9.22   | 9.22   |
| 226686_at    | <i>ZCD2</i>     | 8.105  | 8.705  | 8.755  |
| 222700_at    | <i>ARL6IP2</i>  | 7.115  | 7.645  | 7.695  |
| 203532_x_at  | <i>CUL5</i>     | 5.255  | 5.635  | 5.685  |
| 218473_s_at  | <i>GLT25D1</i>  | 7.87   | 8.46   | 8.51   |
| 225354_s_at  | <i>SH3BGRL2</i> | 2.995  | 3.235  | 3.235  |
| 242149_at    | <i>NA</i>       | 2.985  | 3.215  | 3.225  |
| 239586_at    | <i>FAM83A</i>   | 2.635  | 2.835  | 2.845  |

|              |                 |       |       |       |
|--------------|-----------------|-------|-------|-------|
| 202281_at    | <i>GAK</i>      | 6.255 | 6.765 | 6.735 |
| 232652_x_at  | <i>SCAND1</i>   | 6.485 | 6.975 | 7.025 |
| 227996_at    | <i>FARPI</i>    | 4.175 | 4.505 | 4.515 |
| 227213_at    | <i>DEADC1</i>   | 2.97  | 3.2   | 3.21  |
| 222460_s_at  | <i>NIP30</i>    | 8.175 | 8.825 | 8.835 |
| 229862_x_at  | <i>ZBTB45</i>   | 5.135 | 5.545 | 5.555 |
| 239336_at    | <i>THBS1</i>    | 9.025 | 9.755 | 9.735 |
| 222014_x_at  | <i>MTO1</i>     | 8.645 | 9.345 | 9.335 |
| 235068_at    | <i>ZDHHC21</i>  | 7.355 | 7.975 | 7.925 |
| 228275_at    | <i>NA</i>       | 5.225 | 5.625 | 5.665 |
| 1556950_s_at | <i>SERPINB6</i> | 3.565 | 3.855 | 3.845 |
| 212229_s_at  | <i>FBXO21</i>   | 7.99  | 8.65  | 8.61  |
| 202774_s_at  | <i>SFRS8</i>    | 6.775 | 7.335 | 7.325 |
| 202813_at    | <i>TARBPI</i>   | 4.69  | 5.08  | 5.06  |
| 205618_at    | <i>PRRG1</i>    | 8.695 | 9.405 | 9.385 |
| 229679_at    | <i>FLJ40142</i> | 5.7   | 6.15  | 6.17  |
| 238594_x_at  | <i>NA</i>       | 3.48  | 3.75  | 3.78  |
| 224853_at    | <i>SLAIN2</i>   | 3.515 | 3.805 | 3.795 |
| 202165_at    | <i>PPP1R2</i>   | 8.905 | 9.615 | 9.675 |
| 233819_s_at  | <i>ZNF294</i>   | 6.405 | 6.955 | 6.905 |
| 215227_x_at  | <i>ACPI</i>     | 9.16  | 9.96  | 9.88  |
| 228571_at    | <i>RBAK</i>     | 8.87  | 9.57  | 9.65  |
| 208631_s_at  | <i>HADHA</i>    | 7     | 7.55  | 7.61  |
| 225110_at    | <i>OGFOD1</i>   | 9.31  | 10.14 | 10.04 |
| 207431_s_at  | <i>DEGSI</i>    | 8.03  | 8.67  | 8.74  |
| 201514_s_at  | <i>G3BPI</i>    | 7.065 | 7.645 | 7.675 |
| 223391_at    | <i>SGPPI</i>    | 9.115 | 9.905 | 9.855 |
| 214007_s_at  | <i>TWFI</i>     | 5.785 | 6.295 | 6.235 |
| 238729_x_at  | <i>SAVI</i>     | 3.32  | 3.6   | 3.6   |
| 203478_at    | <i>NDUFC1</i>   | 8.91  | 9.63  | 9.7   |
| 214277_at    | <i>COX11</i>    | 4.305 | 4.665 | 4.665 |



|              |                 |       |       |       |
|--------------|-----------------|-------|-------|-------|
| 226224_at    | <i>FOXK2</i>    | 6.435 | 6.985 | 6.965 |
| 204367_at    | <i>SP2</i>      | 5.43  | 5.89  | 5.89  |
| 219157_at    | <i>KLHL2</i>    | 9.64  | 10.5  | 10.42 |
| 212476_at    | <i>CENTB2</i>   | 10.13 | 11.04 | 10.94 |
| 202584_at    | <i>NFX1</i>     | 4.365 | 4.715 | 4.765 |
| 214794_at    | <i>PA2G4</i>    | 2.725 | 2.945 | 2.975 |
| 1560648_s_at | <i>TSPYL1</i>   | 7.57  | 8.19  | 8.24  |
| 210104_at    | <i>MED6</i>     | 5.035 | 5.455 | 5.465 |
| 40837_at     | <i>TLE2</i>     | 5.42  | 5.89  | 5.88  |
| 216903_s_at  | <i>CBARA1</i>   | 5.745 | 6.215 | 6.265 |
| 235432_at    | <i>NPHP3</i>    | 8.98  | 9.77  | 9.75  |
| 223516_s_at  | <i>C6orf49</i>  | 6.78  | 7.39  | 7.33  |
| 201674_s_at  | <i>AKAP1</i>    | 2.865 | 3.115 | 3.105 |
| 208828_at    | <i>POLE3</i>    | 6.27  | 6.82  | 6.8   |
| 212534_at    | <i>NA</i>       | 8.04  | 8.72  | 8.76  |
| 226399_at    | <i>NA</i>       | 8.035 | 8.725 | 8.745 |
| 218103_at    | <i>FTSJ3</i>    | 7.52  | 8.21  | 8.15  |
| 208579_x_at  | <i>H2BFS</i>    | 3.44  | 3.75  | 3.73  |
| 227304_at    | <i>NA</i>       | 5.035 | 5.455 | 5.495 |
| 224298_s_at  | <i>PHGDHL1</i>  | 6.36  | 6.92  | 6.92  |
| 217857_s_at  | <i>RBM8A</i>    | 4.435 | 4.825 | 4.845 |
| 219169_s_at  | <i>TFB1M</i>    | 6.79  | 7.41  | 7.37  |
| 209352_s_at  | <i>SIN3B</i>    | 4.05  | 4.41  | 4.41  |
| 200045_at    | <i>ABCF1</i>    | 7.65  | 8.33  | 8.33  |
| 229497_at    | <i>ANKDD1A</i>  | 6.815 | 7.415 | 7.445 |
| 242719_at    | <i>NA</i>       | 2.69  | 2.93  | 2.93  |
| 232432_s_at  | <i>SLC30A5</i>  | 8.795 | 9.615 | 9.565 |
| 223255_at    | <i>KIAA1333</i> | 7.52  | 8.16  | 8.23  |
| 218904_s_at  | <i>C9orf40</i>  | 5.435 | 5.905 | 5.955 |
| 232525_at    | <i>SND1</i>     | 2.24  | 2.44  | 2.45  |
| 208688_x_at  | <i>EIF3S9</i>   | 8.065 | 8.825 | 8.755 |

|             |                     |        |        |        |
|-------------|---------------------|--------|--------|--------|
| 221229_s_at | <i>FLJ20628</i>     | 6.945  | 7.615  | 7.545  |
| 202405_at   | <i>TIAL1</i>        | 7.585  | 8.295  | 8.245  |
| 202261_at   | <i>VPS72</i>        | 7.67   | 8.41   | 8.33   |
| 218349_s_at | <i>ZWILCH</i>       | 6.355  | 6.915  | 6.955  |
| 217508_s_at | <i>C18orf25</i>     | 2.97   | 3.26   | 3.23   |
| 201635_s_at | <i>FXR1</i>         | 7.58   | 8.3    | 8.26   |
| 223273_at   | <i>C14orf142</i>    | 5.2    | 5.69   | 5.67   |
| 208954_s_at | <i>LARP5</i>        | 7.885  | 8.645  | 8.575  |
| 209391_at   | <i>DPM2</i>         | 3.545  | 3.875  | 3.865  |
| 227742_at   | <i>CLIC6</i>        | 2.81   | 3.07   | 3.07   |
| 227617_at   | <i>RP13-15M17.2</i> | 6.04   | 6.59   | 6.62   |
| 223334_at   | <i>TMEM126A</i>     | 9.505  | 10.445 | 10.365 |
| 229638_at   | <i>IRX3</i>         | 10.795 | 11.845 | 11.785 |
| 211433_x_at | <i>KIAA1539</i>     | 5.775  | 6.325  | 6.305  |
| 222449_at   | <i>TMEPAI</i>       | 10.925 | 12.025 | 11.895 |
| 210415_s_at | <i>ODF2</i>         | 3.35   | 3.67   | 3.67   |
| 212146_at   | <i>PLEKHM2</i>      | 5.515  | 6.025  | 6.045  |
| 225953_at   | <i>P15RS</i>        | 10.185 | 11.205 | 11.125 |
| 225106_s_at | <i>OGFOD1</i>       | 6.995  | 7.685  | 7.635  |
| 204083_s_at | <i>TPM2</i>         | 10.665 | 11.725 | 11.655 |
| 225749_at   | <i>LOC283951</i>    | 5.335  | 5.835  | 5.875  |
| 225553_at   | <i>NA</i>           | 10.415 | 11.425 | 11.405 |
| 219644_at   | <i>CCDC41</i>       | 5.395  | 5.905  | 5.925  |
| 213453_x_at | <i>GAPDH</i>        | 11.09  | 12.19  | 12.14  |
| 203172_at   | <i>FXR2</i>         | 4.655  | 5.115  | 5.105  |
| 204382_at   | <i>NAT9</i>         | 6.14   | 6.76   | 6.72   |
| 214152_at   | <i>CCPG1</i>        | 9.08   | 9.93   | 9.99   |
| 222986_s_at | <i>SCOTIN</i>       | 8.445  | 9.325  | 9.235  |
| 225610_at   | <i>UHRF2</i>        | 9.94   | 10.87  | 10.97  |
| 228250_at   | <i>FNIP1</i>        | 3.705  | 4.085  | 4.045  |
| 202355_s_at | <i>GTF2F1</i>       | 6.395  | 7.055  | 7.005  |

|              |           |        |        |        |
|--------------|-----------|--------|--------|--------|
| 226232_at    | NA        | 5.785  | 6.375  | 6.345  |
| 210756_s_at  | NOTCH2    | 3.05   | 3.37   | 3.34   |
| 218515_at    | C21orf66  | 8.225  | 9.075  | 9.005  |
| 223215_s_at  | C14orf100 | 10.035 | 11.095 | 10.985 |
| 224679_at    | MESDC2    | 7.4    | 8.16   | 8.13   |
| 203249_at    | EZH1      | 5.825  | 6.395  | 6.445  |
| 234954_at    | NA        | 3.72   | 4.11   | 4.09   |
| 201964_at    | SETX      | 7.175  | 7.945  | 7.875  |
| 203212_s_at  | MTMR2     | 6.565  | 7.205  | 7.255  |
| 222398_s_at  | EFTUD2    | 8.165  | 8.955  | 9.055  |
| 244732_at    | NA        | 3.29   | 3.63   | 3.63   |
| 222263_at    | SLC35E1   | 4.615  | 5.105  | 5.085  |
| 238923_at    | SPOP      | 5.095  | 5.625  | 5.615  |
| 220688_s_at  | MRTO4     | 5.94   | 6.56   | 6.56   |
| 218624_s_at  | MGC2752   | 6.245  | 6.865  | 6.935  |
| 229519_at    | FXR1      | 8.295  | 9.205  | 9.115  |
| 229865_at    | FNDC3B    | 7.295  | 8.065  | 8.045  |
| 220757_s_at  | UBXD1     | 7.25   | 8.04   | 7.98   |
| 1557521_a_at | NA        | 5.265  | 5.815  | 5.825  |
| 211864_s_at  | FER1L3    | 8.76   | 9.72   | 9.64   |
| 221036_s_at  | APH1B     | 3.125  | 3.465  | 3.435  |
| 202530_at    | MAPK14    | 8.115  | 8.995  | 8.945  |
| 210385_s_at  | ARTS-1    | 6.695  | 7.355  | 7.435  |
| 217651_at    | NA        | 2.65   | 2.91   | 2.94   |
| 203430_at    | HEBP2     | 7.455  | 8.225  | 8.275  |
| 229555_at    | GALNT5    | 7.04   | 7.81   | 7.76   |
| 209556_at    | NCDN      | 2.195  | 2.425  | 2.435  |
| 211975_at    | ZNF289    | 5.065  | 5.605  | 5.605  |
| 205671_s_at  | HLA-DOB   | 2.165  | 2.405  | 2.395  |
| 210502_s_at  | PPIE      | 4.035  | 4.455  | 4.455  |
| 229844_at    | NA        | 7.93   | 8.79   | 8.76   |

|             |                  |        |        |        |
|-------------|------------------|--------|--------|--------|
| 209774_x_at | <i>CXCL2</i>     | 3.655  | 4.025  | 4.075  |
| 223060_at   | <i>C14orf119</i> | 8.535  | 9.395  | 9.505  |
| 202239_at   | <i>PARP4</i>     | 6.19   | 6.86   | 6.84   |
| 241344_at   | <i>GLB1</i>      | 7.395  | 8.215  | 8.165  |
| 225477_s_at | <i>NR2C2</i>     | 7.695  | 8.535  | 8.505  |
| 223486_at   | <i>GTPBP8</i>    | 7.22   | 7.97   | 8.03   |
| 225295_at   | <i>SLC39A10</i>  | 10.805 | 12.035 | 11.905 |
| 226973_at   | <i>C20orf102</i> | 3.54   | 3.92   | 3.92   |
| 242963_at   | <i>MGC26963</i>  | 4.82   | 5.37   | 5.31   |
| 201345_s_at | <i>UBE2D2</i>    | 8.005  | 8.865  | 8.875  |
| 212686_at   | <i>PPM1H</i>     | 3.18   | 3.52   | 3.52   |
| 218123_at   | <i>C21orf59</i>  | 7.465  | 8.235  | 8.305  |
| 213766_x_at | <i>NCLN</i>      | 8.26   | 9.12   | 9.19   |
| 212795_at   | <i>KIAA1033</i>  | 9.475  | 10.485 | 10.535 |
| 228174_at   | <i>GOLGA1</i>    | 5.67   | 6.29   | 6.29   |
| 202471_s_at | <i>IDH3G</i>     | 3.94   | 4.36   | 4.39   |
| 219128_at   | <i>C2orf42</i>   | 5.8    | 6.44   | 6.43   |
| 213133_s_at | <i>GCSH</i>      | 6.225  | 6.905  | 6.905  |
| 236044_at   | <i>PPAPDC1A</i>  | 5.66   | 6.25   | 6.31   |
| 204132_s_at | <i>FOXO3A</i>    | 3.025  | 3.355  | 3.375  |
| 225231_at   | <i>CBL</i>       | 7.95   | 8.83   | 8.83   |
| 238891_at   | <i>NA</i>        | 4.04   | 4.5    | 4.46   |
| 1566956_at  | <i>OR7E104P</i>  | 4.15   | 4.61   | 4.61   |
| 218151_x_at | <i>GPR172A</i>   | 7.38   | 8.15   | 8.25   |
| 216317_x_at | <i>RHCE</i>      | 2.58   | 2.87   | 2.85   |
| 213381_at   | <i>C10orf72</i>  | 8.12   | 9.02   | 9.02   |
| 202496_at   | <i>EDC4</i>      | 3.665  | 4.065  | 4.075  |
| 235119_at   | <i>TAF3</i>      | 5.57   | 6.18   | 6.2    |
| 206142_at   | <i>ZNF135</i>    | 4.31   | 4.8    | 4.78   |
| 242538_at   | <i>TFDP1</i>     | 4.8    | 5.34   | 5.34   |
| 243016_at   | <i>TYMS</i>      | 4.47   | 4.95   | 5      |

|              |                 |       |        |        |
|--------------|-----------------|-------|--------|--------|
| 223042_s_at  | <i>FUNDC2</i>   | 7.54  | 8.39   | 8.41   |
| 209467_s_at  | <i>MKNK1</i>    | 3.425 | 3.805  | 3.815  |
| 201831_s_at  | <i>VDP</i>      | 9.725 | 10.835 | 10.825 |
| 236569_at    | <i>RAB14</i>    | 5.11  | 5.71   | 5.67   |
| 210568_s_at  | <i>RECQL</i>    | 7.37  | 8.21   | 8.22   |
| 222530_s_at  | <i>MKKS</i>     | 8.965 | 10.045 | 9.935  |
| 202417_at    | <i>KEAP1</i>    | 7.395 | 8.225  | 8.255  |
| 219008_at    | <i>C2orf43</i>  | 6.045 | 6.765  | 6.725  |
| 1560500_at   | <i>NA</i>       | 3.425 | 3.845  | 3.805  |
| 1554021_a_at | <i>ZNF12</i>    | 5.315 | 5.905  | 5.965  |
| 210329_s_at  | <i>SGCD</i>     | 7.515 | 8.385  | 8.395  |
| 213598_at    | <i>DIMTIL</i>   | 5.7   | 6.36   | 6.37   |
| 212342_at    | <i>YIPF6</i>    | 7.795 | 8.745  | 8.685  |
| 244462_at    | <i>ZNF224</i>   | 3.455 | 3.845  | 3.875  |
| 222762_x_at  | <i>LIMD1</i>    | 8.075 | 9.005  | 9.035  |
| 223594_at    | <i>TMEM117</i>  | 8.035 | 8.935  | 9.025  |
| 229018_at    | <i>C12orf26</i> | 7.745 | 8.615  | 8.705  |
| 226754_at    | <i>ZNF251</i>   | 4.695 | 5.265  | 5.235  |
| 202475_at    | <i>TMEM147</i>  | 5.655 | 6.295  | 6.345  |
| 225508_at    | <i>KIAA1468</i> | 5.815 | 6.465  | 6.535  |
| 201702_s_at  | <i>PPP1R10</i>  | 4.905 | 5.475  | 5.495  |
| 201985_at    | <i>KIAA0196</i> | 7.61  | 8.56   | 8.46   |
| 228655_at    | <i>NA</i>       | 3.99  | 4.46   | 4.47   |
| 40465_at     | <i>DDX23</i>    | 6.125 | 6.835  | 6.885  |
| 204928_s_at  | <i>SLC10A3</i>  | 6.38  | 7.15   | 7.14   |
| 225772_s_at  | <i>C12orf62</i> | 5.92  | 6.65   | 6.62   |
| 218580_x_at  | <i>AURKAIP1</i> | 7.7   | 8.63   | 8.64   |
| 215994_x_at  | <i>TBC1D9B</i>  | 6.3   | 7.04   | 7.09   |
| 220097_s_at  | <i>TMEM104</i>  | 6.61  | 7.41   | 7.42   |
| 205283_at    | <i>FCMD</i>     | 6.73  | 7.59   | 7.51   |
| 210407_at    | <i>PPM1A</i>    | 6.485 | 7.265  | 7.295  |

|              |                  |       |       |       |
|--------------|------------------|-------|-------|-------|
| 226015_at    | <i>ZNF12</i>     | 7.785 | 8.765 | 8.725 |
| 221833_at    | <i>SIAH1</i>     | 6.21  | 6.95  | 7     |
| 204370_at    | <i>CLP1</i>      | 6.67  | 7.5   | 7.48  |
| 218840_s_at  | <i>NADSYN1</i>   | 5.66  | 6.36  | 6.35  |
| 227692_at    | <i>GNAI1</i>     | 9.39  | 10.5  | 10.6  |
| 208736_at    | <i>ARPC3</i>     | 8.63  | 9.65  | 9.73  |
| 201673_s_at  | <i>GYS1</i>      | 6.225 | 7.015 | 6.985 |
| 231937_at    | <i>NA</i>        | 3.135 | 3.535 | 3.505 |
| 209852_x_at  | <i>PSME3</i>     | 4.9   | 5.52  | 5.49  |
| 221567_at    | <i>NOL3</i>      | 3.575 | 4.005 | 4.035 |
| 201736_s_at  | <i>6-Mar</i>     | 7.835 | 8.765 | 8.865 |
| 229127_at    | <i>ATP5J</i>     | 8.06  | 9.06  | 9.06  |
| 207071_s_at  | <i>ACO1</i>      | 7.325 | 8.235 | 8.245 |
| 209748_at    | <i>SPAST</i>     | 8.195 | 9.235 | 9.195 |
| 201627_s_at  | <i>INSIG1</i>    | 8.34  | 9.41  | 9.35  |
| 225401_at    | <i>C1orf85</i>   | 5.805 | 6.515 | 6.535 |
| 235204_at    | <i>ENTPD7</i>    | 7.99  | 8.97  | 9.01  |
| 218143_s_at  | <i>SCAMP2</i>    | 6.72  | 7.59  | 7.53  |
| 1555730_a_at | <i>CFL1</i>      | 3.535 | 3.955 | 4.005 |
| 207721_x_at  | <i>HINT1</i>     | 10.3  | 11.68 | 11.52 |
| 226577_at    | <i>NA</i>        | 5.55  | 6.24  | 6.27  |
| 218105_s_at  | <i>MRPL4</i>     | 2.63  | 2.95  | 2.98  |
| 203415_at    | <i>PDCD6</i>     | 6.9   | 7.78  | 7.78  |
| 226854_at    | <i>GTPBP5</i>    | 2.53  | 2.83  | 2.87  |
| 219809_at    | <i>WDR55</i>     | 5.075 | 5.695 | 5.745 |
| 227486_at    | <i>NT5E</i>      | 7.135 | 8.025 | 8.075 |
| 225244_at    | <i>C1orf142</i>  | 6.98  | 7.91  | 7.84  |
| 201680_x_at  | <i>ARS2</i>      | 7.235 | 8.135 | 8.185 |
| 226758_at    | <i>LUC7L2</i>    | 8.67  | 9.82  | 9.75  |
| 204706_at    | <i>INPP5E</i>    | 7     | 7.89  | 7.91  |
| 1569517_at   | <i>LOC646482</i> | 2.26  | 2.57  | 2.54  |

|              |                  |        |        |        |
|--------------|------------------|--------|--------|--------|
| 240834_at    | <i>FAM105B</i>   | 4.845  | 5.465  | 5.495  |
| 213971_s_at  | <i>SUZ12P</i>    | 6.405  | 7.265  | 7.215  |
| 218206_x_at  | <i>SCAND1</i>    | 5.38   | 6.11   | 6.05   |
| 207035_at    | <i>SLC30A3</i>   | 3.53   | 4      | 3.98   |
| 223067_at    | <i>HSPC148</i>   | 8.69   | 9.81   | 9.85   |
| 216251_s_at  | <i>TLL12</i>     | 6.82   | 7.7    | 7.73   |
| 209836_x_at  | <i>BOLA2</i>     | 6.53   | 7.36   | 7.41   |
| 208328_s_at  | <i>MEF2A</i>     | 5.935  | 6.725  | 6.705  |
| 1568865_at   | <i>FNTB</i>      | 2.48   | 2.81   | 2.8    |
| 209322_s_at  | <i>SH2B1</i>     | 3.525  | 3.975  | 3.995  |
| 201522_x_at  | <i>SNRPN</i>     | 7.315  | 8.325  | 8.255  |
| 222817_at    | <i>HSD3B7</i>    | 4.11   | 4.66   | 4.65   |
| 212098_at    | <i>LOC151162</i> | 10.435 | 11.855 | 11.815 |
| 236778_at    | <i>ATRX</i>      | 7.835  | 8.915  | 8.845  |
| 200824_at    | <i>GSTP1</i>     | 6.6    | 7.51   | 7.45   |
| 218106_s_at  | <i>MRPS10</i>    | 8.06   | 9.13   | 9.15   |
| 225429_at    | <i>NA</i>        | 6.925  | 7.855  | 7.845  |
| 228211_at    | <i>C9orf102</i>  | 3.205  | 3.615  | 3.645  |
| 224649_x_at  | <i>CCNY</i>      | 6.135  | 6.995  | 6.915  |
| 210434_x_at  | <i>JTB</i>       | 9.755  | 11.115 | 11.035 |
| 212390_at    | <i>PDE4DIP</i>   | 6.98   | 7.9    | 7.94   |
| 213025_at    | <i>THUMPD1</i>   | 8.095  | 9.195  | 9.165  |
| 205116_at    | <i>LAMA2</i>     | 6.145  | 6.965  | 6.975  |
| 221473_x_at  | <i>SERINC3</i>   | 8.19   | 9.35   | 9.23   |
| 213741_s_at  | <i>KPNA1</i>     | 5.96   | 6.77   | 6.76   |
| 201433_s_at  | <i>PTDSS1</i>    | 8.92   | 10.1   | 10.14  |
| 200837_at    | <i>BCAP31</i>    | 8.1    | 9.17   | 9.23   |
| 208866_at    | <i>CSNK1A1</i>   | 6.93   | 7.84   | 7.9    |
| 1560060_s_at | <i>VPS37C</i>    | 10.205 | 11.665 | 11.515 |
| 218095_s_at  | <i>TMEM165</i>   | 10.14  | 11.53  | 11.52  |
| 218027_at    | <i>MRPL15</i>    | 7.22   | 8.22   | 8.19   |

|             |                  |       |        |        |
|-------------|------------------|-------|--------|--------|
| 227193_at   | <i>NA</i>        | 8.545 | 9.665  | 9.775  |
| 217742_s_at | <i>WAC</i>       | 7.045 | 8.045  | 7.975  |
| 222593_s_at | <i>SPATS2</i>    | 7.74  | 8.8    | 8.81   |
| 224881_at   | <i>VKORC1L1</i>  | 5.885 | 6.705  | 6.675  |
| 218898_at   | <i>FAM57A</i>    | 5.74  | 6.53   | 6.54   |
| 217437_s_at | <i>TACCI</i>     | 7.45  | 8.45   | 8.52   |
| 225498_at   | <i>CHMP4B</i>    | 8.865 | 10.115 | 10.065 |
| 235531_at   | <i>IL17RB</i>    | 5.06  | 5.75   | 5.77   |
| 201685_s_at | <i>KIAA0737</i>  | 7.22  | 8.27   | 8.17   |
| 218626_at   | <i>EIF4ENIF1</i> | 6.675 | 7.595  | 7.605  |
| 203364_s_at | <i>KIAA0652</i>  | 3.93  | 4.44   | 4.5    |
| 227418_at   | <i>KIAA1826</i>  | 7.04  | 8.01   | 8.04   |
| 230465_at   | <i>HS2ST1</i>    | 3.665 | 4.165  | 4.195  |
| 220160_s_at | <i>KPTN</i>      | 6.245 | 7.125  | 7.125  |
| 32088_at    | <i>BLZF1</i>     | 5.96  | 6.83   | 6.77   |
| 236458_at   | <i>NA</i>        | 2.335 | 2.655  | 2.665  |
| 44669_at    | <i>LOC644096</i> | 4.95  | 5.62   | 5.68   |
| 201057_s_at | <i>GOLGB1</i>    | 8.425 | 9.645  | 9.575  |
| 218831_s_at | <i>FCGRT</i>     | 5.195 | 5.935  | 5.925  |
| 231879_at   | <i>COL12A1</i>   | 4.735 | 5.375  | 5.425  |
| 201607_at   | <i>PWPI</i>      | 7.01  | 8.06   | 7.95   |
| 219279_at   | <i>DOCK10</i>    | 5.985 | 6.775  | 6.875  |
| 219482_at   | <i>SETD4</i>     | 5.755 | 6.585  | 6.555  |
| 225067_at   | <i>ULK3</i>      | 2.49  | 2.85   | 2.84   |
| 210927_x_at | <i>JTB</i>       | 8.7   | 9.91   | 9.97   |
| 230578_at   | <i>NA</i>        | 5.6   | 6.38   | 6.42   |
| 201568_at   | <i>UQCRO</i>     | 8.9   | 10.22  | 10.13  |
| 202395_at   | <i>NSF</i>       | 8.335 | 9.555  | 9.515  |
| 230885_at   | <i>SPG7</i>      | 5.505 | 6.245  | 6.335  |
| 215495_s_at | <i>SAMD4A</i>    | 2.76  | 3.17   | 3.15   |
| 223824_at   | <i>C10orf59</i>  | 5.215 | 5.935  | 5.975  |



|             |                  |        |        |        |
|-------------|------------------|--------|--------|--------|
| 1569519_at  | <i>NBPF11</i>    | 3.42   | 3.92   | 3.91   |
| 243948_at   | <i>NA</i>        | 6.375  | 7.305  | 7.275  |
| 217043_s_at | <i>MFN1</i>      | 7.145  | 8.145  | 8.195  |
| 225760_at   | <i>MYSM1</i>     | 7.22   | 8.31   | 8.21   |
| 211379_x_at | <i>B3GALNT1</i>  | 5.84   | 6.7    | 6.66   |
| 1566586_at  | <i>NA</i>        | 2.91   | 3.33   | 3.33   |
| 203460_s_at | <i>PSEN1</i>     | 7.365  | 8.415  | 8.445  |
| 205547_s_at | <i>TAGLN</i>     | 10.565 | 12.195 | 12.005 |
| 201206_s_at | <i>RRBP1</i>     | 7.55   | 8.61   | 8.69   |
| 204360_s_at | <i>NAGLU</i>     | 6.33   | 7.29   | 7.21   |
| 226805_at   | <i>C20orf142</i> | 5.92   | 6.77   | 6.79   |
| 226501_at   | <i>XPNPEP3</i>   | 7.215  | 8.235  | 8.275  |
| 218252_at   | <i>CKAP2</i>     | 6.955  | 7.995  | 7.945  |
| 201146_at   | <i>NFE2L2</i>    | 9.48   | 10.94  | 10.78  |
| 218163_at   | <i>MCTS1</i>     | 8.405  | 9.615  | 9.635  |
| 228690_s_at | <i>NDUFA11</i>   | 8      | 9.16   | 9.17   |
| 218311_at   | <i>MAP4K3</i>    | 7.45   | 8.51   | 8.56   |
| 224623_at   | <i>LOC728554</i> | 4.69   | 5.4    | 5.35   |
| 227001_at   | <i>NPAL2</i>     | 8.74   | 10.08  | 9.95   |
| 218337_at   | <i>RAI16</i>     | 5.065  | 5.835  | 5.775  |
| 238889_at   | <i>FLJ21839</i>  | 5.3    | 6.05   | 6.11   |
| 222439_s_at | <i>THRAP3</i>    | 8.875  | 10.215 | 10.135 |
| 240592_at   | <i>NCAPG</i>     | 6.835  | 7.835  | 7.835  |
| 205298_s_at | <i>BTN2A2</i>    | 6.955  | 8.015  | 7.945  |
| 204327_s_at | <i>ZNF202</i>    | 5.13   | 5.89   | 5.89   |
| 209092_s_at | <i>C17orf25</i>  | 7.05   | 8.05   | 8.13   |
| 227936_at   | <i>TMEM68</i>    | 5.64   | 6.52   | 6.44   |
| 239682_at   | <i>FLJ23861</i>  | 5.19   | 5.99   | 5.94   |
| 218197_s_at | <i>OXRI</i>      | 8.285  | 9.535  | 9.485  |
| 225055_at   | <i>LOC728850</i> | 7.59   | 8.66   | 8.76   |
| 214949_at   | <i>NA</i>        | 8.01   | 9.26   | 9.12   |

|              |                |       |        |        |
|--------------|----------------|-------|--------|--------|
| 207180_s_at  | <i>HTATIP2</i> | 5.595 | 6.475  | 6.385  |
| 223978_s_at  | <i>CRLS1</i>   | 7.05  | 8.05   | 8.13   |
| 209356_x_at  | <i>EFEMP2</i>  | 7.595 | 8.685  | 8.785  |
| 213020_at    | <i>GOSR1</i>   | 6.57  | 7.53   | 7.57   |
| 225136_at    | <i>PLEKHA2</i> | 7.83  | 8.94   | 9.05   |
| 210959_s_at  | <i>SRD5A1</i>  | 6.43  | 7.36   | 7.42   |
| 226515_at    | <i>CCDC127</i> | 5.545 | 6.375  | 6.365  |
| 232184_at    | <i>ALS2</i>    | 7.16  | 8.19   | 8.28   |
| 209264_s_at  | <i>TSPAN4</i>  | 4.085 | 4.705  | 4.695  |
| 217895_at    | <i>PTCD3</i>   | 6.49  | 7.47   | 7.46   |
| 219499_at    | <i>SEC61A2</i> | 3.405 | 3.895  | 3.945  |
| 226572_at    | <i>SOCS7</i>   | 6.56  | 7.51   | 7.57   |
| 217826_s_at  | <i>UBE2J1</i>  | 6.78  | 7.74   | 7.86   |
| 239835_at    | <i>KBTBD8</i>  | 4.77  | 5.46   | 5.52   |
| 221499_s_at  | <i>STX16</i>   | 6.975 | 7.985  | 8.055  |
| 229325_at    | <i>ZZZ3</i>    | 5.03  | 5.78   | 5.81   |
| 212725_s_at  | <i>TUG1</i>    | 8.255 | 9.505  | 9.495  |
| 235072_s_at  | <i>NA</i>      | 10.7  | 12.34  | 12.3   |
| 218056_at    | <i>BFAR</i>    | 6.385 | 7.405  | 7.295  |
| 201861_s_at  | <i>LRRFIP1</i> | 8.94  | 10.27  | 10.33  |
| 208846_s_at  | <i>VDAC3</i>   | 6.16  | 7.15   | 7.05   |
| 225730_s_at  | <i>THUMPD3</i> | 5.61  | 6.44   | 6.49   |
| 1552360_a_at | <i>TIRAP</i>   | 3.035 | 3.525  | 3.475  |
| 242033_at    | <i>RNF180</i>  | 3.175 | 3.635  | 3.675  |
| 210719_s_at  | <i>HMG20B</i>  | 5.125 | 5.885  | 5.955  |
| 201799_s_at  | <i>OSBP</i>    | 6.07  | 6.99   | 7.02   |
| 222116_s_at  | <i>TBC1D16</i> | 8.185 | 9.445  | 9.445  |
| 227018_at    | <i>DPP8</i>    | 6.77  | 7.75   | 7.88   |
| 219297_at    | <i>WDR44</i>   | 8.375 | 9.655  | 9.695  |
| 212630_at    | <i>EXOC3</i>   | 6.28  | 7.29   | 7.23   |
| 225853_at    | <i>GNPNAT1</i> | 8.775 | 10.225 | 10.075 |

|             |                  |       |        |        |
|-------------|------------------|-------|--------|--------|
| 213009_s_at | <i>TRIM37</i>    | 8.56  | 9.95   | 9.86   |
| 236515_at   | <i>SAPS3</i>     | 6.875 | 7.965  | 7.935  |
| 207196_s_at | <i>TNIP1</i>     | 8.29  | 9.57   | 9.61   |
| 209233_at   | <i>EMG1</i>      | 6.675 | 7.655  | 7.775  |
| 200704_at   | <i>LITAF</i>     | 9.28  | 10.82  | 10.65  |
| 226732_at   | <i>RBM33</i>     | 6.83  | 7.93   | 7.88   |
| 219520_s_at | <i>WWC3</i>      | 6.86  | 7.88   | 8      |
| 222993_at   | <i>MRPL37</i>    | 5.395 | 6.205  | 6.295  |
| 201828_x_at | <i>FAM127A</i>   | 7.775 | 8.995  | 9.005  |
| 212482_at   | <i>RMND5A</i>    | 6.6   | 7.63   | 7.65   |
| 217828_at   | <i>SLTM</i>      | 9.495 | 10.935 | 11.055 |
| 229393_at   | <i>L3MBTL3</i>   | 7.58  | 8.84   | 8.73   |
| 226241_s_at | <i>MRPL52</i>    | 7.32  | 8.44   | 8.53   |
| 201377_at   | <i>UBAP2L</i>    | 7     | 8.05   | 8.19   |
| 213246_at   | <i>C14orf130</i> | 5.15  | 5.99   | 5.95   |
| 227852_at   | <i>RP9</i>       | 5.38  | 6.29   | 6.2    |
| 208707_at   | <i>EIF5</i>      | 4.175 | 4.875  | 4.825  |
| 209272_at   | <i>NAB1</i>      | 7.925 | 9.265  | 9.145  |
| 208955_at   | <i>DUT</i>       | 5.665 | 6.615  | 6.555  |
| 213637_at   | <i>NA</i>        | 7.81  | 9.13   | 9      |
| 200607_s_at | <i>RAD21</i>     | 6.325 | 7.385  | 7.295  |
| 209864_at   | <i>FRAT2</i>     | 2.565 | 2.975  | 2.985  |
| 225424_at   | <i>GPAM</i>      | 6.54  | 7.61   | 7.58   |
| 226942_at   | <i>PHF20L1</i>   | 6.115 | 7.085  | 7.105  |
| 200001_at   | <i>CAPNS1</i>    | 8.365 | 9.695  | 9.725  |
| 224864_at   | <i>SRA1</i>      | 7.385 | 8.655  | 8.515  |
| 203848_at   | <i>AKAP8</i>     | 7.365 | 8.615  | 8.505  |
| 221705_s_at | <i>SIKE</i>      | 5.87  | 6.85   | 6.8    |
| 221780_s_at | <i>DDX27</i>     | 6.89  | 8.03   | 8      |
| 204244_s_at | <i>DBF4</i>      | 5.4   | 6.25   | 6.32   |
| 214783_s_at | <i>ANXA11</i>    | 7.025 | 8.135  | 8.225  |

|              |                  |       |        |        |
|--------------|------------------|-------|--------|--------|
| 218631_at    | <i>AVP11</i>     | 5.83  | 6.79   | 6.79   |
| 226579_at    | <i>KNS2</i>      | 7.665 | 8.905  | 8.935  |
| 225451_at    | <i>GRIPAP1</i>   | 4.15  | 4.81   | 4.85   |
| 218716_x_at  | <i>MTO1</i>      | 7.355 | 8.625  | 8.495  |
| 209934_s_at  | <i>ATP2C1</i>    | 7.215 | 8.445  | 8.345  |
| 228583_at    | <i>LIN52</i>     | 6.755 | 7.935  | 7.805  |
| 226914_at    | <i>ARPC5L</i>    | 9.425 | 11.035 | 10.905 |
| 200924_s_at  | <i>SLC3A2</i>    | 7.155 | 8.385  | 8.285  |
| 225576_at    | <i>C6orf72</i>   | 8.04  | 9.36   | 9.36   |
| 209234_at    | <i>KIF1B</i>     | 6.005 | 6.945  | 7.035  |
| 202307_s_at  | <i>TAP1</i>      | 6.56  | 7.64   | 7.65   |
| 225300_at    | <i>C15orf23</i>  | 6.31  | 7.36   | 7.34   |
| 1555968_a_at | <i>NA</i>        | 5.24  | 6.15   | 6.05   |
| 224512_s_at  | <i>LSMD1</i>     | 6.16  | 7.2    | 7.16   |
| 225827_at    | <i>EIF2C2</i>    | 4.835 | 5.595  | 5.675  |
| 223381_at    | <i>NUF2</i>      | 4.395 | 5.095  | 5.175  |
| 218246_at    | <i>C1orf166</i>  | 6.68  | 7.78   | 7.81   |
| 1556131_s_at | <i>FBF1</i>      | 3.285 | 3.855  | 3.825  |
| 230241_at    | <i>IFRG15</i>    | 5.8   | 6.75   | 6.8    |
| 225635_s_at  | <i>LOC401504</i> | 6.625 | 7.735  | 7.745  |
| 1561171_a_at | <i>FLJ36131</i>  | 3.19  | 3.76   | 3.7    |
| 230077_at    | <i>SDHALP1</i>   | 6.3   | 7.32   | 7.4    |
| 236600_at    | <i>SPG20</i>     | 6.825 | 8.015  | 7.945  |
| 202866_at    | <i>DNAJB12</i>   | 7.645 | 8.955  | 8.905  |
| 203694_s_at  | <i>DHX16</i>     | 6.65  | 7.75   | 7.79   |
| 200793_s_at  | <i>ACO2</i>      | 5.595 | 6.575  | 6.495  |
| 233487_s_at  | <i>LRRC8A</i>    | 6.215 | 7.265  | 7.255  |
| 238186_at    | <i>NA</i>        | 2.795 | 3.285  | 3.255  |
| 227730_at    | <i>NA</i>        | 4.24  | 4.94   | 4.98   |
| 225484_at    | <i>TSGA14</i>    | 5.125 | 6.005  | 5.995  |
| 229517_at    | <i>PTPDC1</i>    | 6.67  | 7.8    | 7.82   |

|              |                    |       |        |        |
|--------------|--------------------|-------|--------|--------|
| 200721_s_at  | <i>ACTRIA</i>      | 5.46  | 6.35   | 6.44   |
| 231823_s_at  | <i>SH3PXD2B</i>    | 8.67  | 10.16  | 10.14  |
| 217822_at    | <i>WBP11</i>       | 7.44  | 8.69   | 8.74   |
| 207812_s_at  | <i>GORASP2</i>     | 9.175 | 10.685 | 10.795 |
| 209721_s_at  | <i>HOM-TES-103</i> | 6.56  | 7.71   | 7.65   |
| 209803_s_at  | <i>PHLDA2</i>      | 10.51 | 12.25  | 12.37  |
| 215233_at    | <i>JMJD6</i>       | 4.355 | 5.095  | 5.125  |
| 228005_at    | <i>ZXDB</i>        | 5.46  | 6.36   | 6.44   |
| 225157_at    | <i>MLXIP</i>       | 7.125 | 8.355  | 8.375  |
| 225493_at    | <i>LOC144438</i>   | 7.62  | 8.96   | 8.92   |
| 221752_at    | <i>SSH1</i>        | 8.445 | 9.855  | 9.965  |
| 221740_x_at  | <i>LRRC37A</i>     | 5.64  | 6.65   | 6.59   |
| 231059_x_at  | <i>SCAND1</i>      | 3.945 | 4.585  | 4.665  |
| 202986_at    | <i>ARNT2</i>       | 5.56  | 6.56   | 6.49   |
| 209845_at    | <i>MKRNI</i>       | 6.73  | 7.85   | 7.96   |
| 242851_at    | <i>KIAA1919</i>    | 5.77  | 6.72   | 6.83   |
| 223527_s_at  | <i>CDADC1</i>      | 6.37  | 7.46   | 7.52   |
| 208717_at    | <i>OXAIL</i>       | 5.055 | 5.975  | 5.895  |
| 217893_s_at  | <i>C1orf108</i>    | 7.92  | 9.29   | 9.34   |
| 213595_s_at  | <i>CDC42BPA</i>    | 6.24  | 7.4    | 7.28   |
| 221107_at    | <i>CHRNA9</i>      | 2.425 | 2.865  | 2.825  |
| 205217_at    | <i>TIMM8A</i>      | 5.495 | 6.465  | 6.485  |
| 225669_at    | <i>IFNARI</i>      | 7.86  | 9.28   | 9.23   |
| 1552422_at   | <i>C10orf25</i>    | 4.895 | 5.765  | 5.775  |
| 226734_at    | <i>EIF4E2</i>      | 5.905 | 7.015  | 6.905  |
| 208097_s_at  | <i>TXNDC1</i>      | 5.175 | 6.145  | 6.045  |
| 227247_at    | <i>PLEKHA8</i>     | 6.62  | 7.76   | 7.84   |
| 1556061_at   | <i>RPP30</i>       | 5.815 | 6.875  | 6.835  |
| 225716_at    | <i>NA</i>          | 7.665 | 9.055  | 9.025  |
| 1555724_s_at | <i>TAGLN</i>       | 7.195 | 8.515  | 8.465  |
| 216088_s_at  | <i>PSMA7</i>       | 6.855 | 8.025  | 8.125  |

|              |                 |       |       |       |
|--------------|-----------------|-------|-------|-------|
| 212781_at    | <i>RBBP6</i>    | 6.66  | 7.85  | 7.87  |
| 225158_at    | <i>GFMI</i>     | 8.155 | 9.645 | 9.595 |
| 232008_s_at  | <i>BBX</i>      | 7.46  | 8.78  | 8.82  |
| 224637_at    | <i>NA</i>       | 8.025 | 9.415 | 9.545 |
| 202783_at    | <i>NNT</i>      | 5.655 | 6.715 | 6.635 |
| 202625_at    | <i>LYN</i>      | 5.525 | 6.545 | 6.505 |
| 221577_x_at  | <i>GDF15</i>    | 4.62  | 5.48  | 5.45  |
| 227685_at    | <i>TMF1</i>     | 7.625 | 9.095 | 8.945 |
| 218838_s_at  | <i>TTC31</i>    | 6.13  | 7.19  | 7.31  |
| 227646_at    | <i>NA</i>       | 8.265 | 9.835 | 9.735 |
| 225552_x_at  | <i>CCNL2</i>    | 7.61  | 9.02  | 9     |
| 1555427_s_at | <i>SYNCRIP</i>  | 8.61  | 10.21 | 10.17 |
| 220349_s_at  | <i>FLJ21865</i> | 5.575 | 6.605 | 6.595 |
| 202527_s_at  | <i>SMAD4</i>    | 6.94  | 8.29  | 8.15  |
| 1558279_a_at | <i>NA</i>       | 6.86  | 8.06  | 8.18  |
| 214151_s_at  | <i>CCPG1</i>    | 7.47  | 8.87  | 8.83  |
| 204956_at    | <i>MTAP</i>     | 6.04  | 7.2   | 7.12  |
| 209455_at    | <i>FBXW11</i>   | 8.95  | 10.64 | 10.58 |
| 209202_s_at  | <i>EXTL3</i>    | 4.355 | 5.115 | 5.205 |
| 222432_s_at  | <i>CCDC47</i>   | 7.875 | 9.285 | 9.385 |
| 215749_s_at  | <i>GORASP1</i>  | 5.23  | 6.23  | 6.19  |
| 230596_at    | <i>NA</i>       | 2.88  | 3.4   | 3.44  |
| 202595_s_at  | <i>LEPROTL1</i> | 5.96  | 7.14  | 7.02  |
| 211031_s_at  | <i>CLIP2</i>    | 4.085 | 4.875 | 4.845 |
| 202705_at    | <i>CCNB2</i>    | 6.68  | 7.97  | 7.92  |
| 201500_s_at  | <i>PPP1R11</i>  | 7.25  | 8.68  | 8.58  |
| 202731_at    | <i>PDCD4</i>    | 4.485 | 5.335 | 5.355 |
| 224861_at    | <i>GNAQ</i>     | 8.05  | 9.51  | 9.67  |
| 202642_s_at  | <i>TRRAP</i>    | 5.75  | 6.9   | 6.8   |
| 206452_x_at  | <i>PPP2R4</i>   | 5.4   | 6.5   | 6.38  |
| 217854_s_at  | <i>POLR2E</i>   | 5.98  | 7.09  | 7.16  |

|             |                 |       |        |        |
|-------------|-----------------|-------|--------|--------|
| 217627_at   | <i>ZNF573</i>   | 6.14  | 7.29   | 7.35   |
| 226089_at   | <i>RABL3</i>    | 3.835 | 4.575  | 4.575  |
| 228045_at   | <i>NA</i>       | 6.835 | 8.115  | 8.185  |
| 212881_at   | <i>PIAS4</i>    | 4.59  | 5.47   | 5.48   |
| 1555886_at  | <i>PDSS2</i>    | 4.47  | 5.3    | 5.36   |
| 203262_s_at | <i>FAM50A</i>   | 6.43  | 7.69   | 7.66   |
| 208723_at   | <i>USP11</i>    | 6.41  | 7.65   | 7.65   |
| 213011_s_at | <i>TPII</i>     | 8.245 | 9.855  | 9.835  |
| 205437_at   | <i>ZNF211</i>   | 5.315 | 6.405  | 6.295  |
| 212983_at   | <i>HRAS</i>     | 4.565 | 5.505  | 5.415  |
| 213145_at   | <i>FBXL14</i>   | 5.85  | 6.97   | 7.02   |
| 234672_s_at | <i>TMEM48</i>   | 7.66  | 9.09   | 9.23   |
| 209365_s_at | <i>ECM1</i>     | 6.145 | 7.365  | 7.335  |
| 202492_at   | <i>ATG9A</i>    | 4.73  | 5.64   | 5.67   |
| 202754_at   | <i>R3HDM1</i>   | 7.275 | 8.735  | 8.665  |
| 230664_at   | <i>MGC39900</i> | 4.835 | 5.745  | 5.815  |
| 227433_at   | <i>KIAA2018</i> | 6.14  | 7.32   | 7.36   |
| 208810_at   | <i>DNAJB6</i>   | 6.99  | 8.43   | 8.3    |
| 207654_x_at | <i>DRI</i>      | 5.58  | 6.66   | 6.7    |
| 226474_at   | <i>NLRC5</i>    | 7.51  | 9      | 8.98   |
| 212565_at   | <i>STK38L</i>   | 8.455 | 10.115 | 10.125 |
| 213567_at   | <i>NA</i>       | 7.13  | 8.57   | 8.52   |
| 212677_s_at | <i>CEP68</i>    | 5.1   | 6.08   | 6.13   |
| 217784_at   | <i>YKT6</i>     | 5.55  | 6.61   | 6.7    |
| 227527_at   | <i>MLL2</i>     | 7.74  | 9.22   | 9.34   |
| 227970_at   | <i>GPR157</i>   | 4.795 | 5.775  | 5.735  |
| 228736_at   | <i>HEL308</i>   | 5.655 | 6.825  | 6.755  |
| 226929_at   | <i>MTHFR</i>    | 3.675 | 4.455  | 4.375  |
| 241709_s_at | <i>DOCK1</i>    | 3.675 | 4.435  | 4.395  |
| 213739_at   | <i>NA</i>       | 3.335 | 4.015  | 3.985  |
| 212496_s_at | <i>JMJD2B</i>   | 6.97  | 8.45   | 8.29   |

|              |                  |       |       |        |
|--------------|------------------|-------|-------|--------|
| 221692_s_at  | <i>MRPL34</i>    | 3.635 | 4.375 | 4.375  |
| 206364_at    | <i>KIF14</i>     | 5.27  | 6.3   | 6.36   |
| 202096_s_at  | <i>TSPO</i>      | 5.86  | 7.09  | 6.98   |
| 214578_s_at  | <i>ROCK1</i>     | 6.285 | 7.595 | 7.495  |
| 204278_s_at  | <i>EBAG9</i>     | 5.83  | 7.04  | 6.97   |
| 222732_at    | <i>TRIM39</i>    | 5.62  | 6.81  | 6.71   |
| 229267_at    | <i>ANAPC1</i>    | 5.54  | 6.67  | 6.65   |
| 200828_s_at  | <i>RHOT1</i>     | 7.79  | 9.44  | 9.3    |
| 201132_at    | <i>HNRPH2</i>    | 8.37  | 10.03 | 10.1   |
| 208698_s_at  | <i>NONO</i>      | 6.735 | 8.035 | 8.165  |
| 201584_s_at  | <i>DDX39</i>     | 6.87  | 8.31  | 8.23   |
| 1558529_s_at | <i>NA</i>        | 2.63  | 3.15  | 3.19   |
| 211928_at    | <i>DYNC1H1</i>   | 7.485 | 9.045 | 8.965  |
| 235505_s_at  | <i>NA</i>        | 5.96  | 7.24  | 7.13   |
| 217492_s_at  | <i>PTENP1</i>    | 7.795 | 9.495 | 9.305  |
| 209724_s_at  | <i>ZFP161</i>    | 4.105 | 4.915 | 4.975  |
| 227143_s_at  | <i>BID</i>       | 6.175 | 7.455 | 7.455  |
| 223776_x_at  | <i>TINF2</i>     | 5.755 | 6.995 | 6.885  |
| 212860_at    | <i>ZDHHC18</i>   | 4.41  | 5.37  | 5.28   |
| 212083_at    | <i>TEX261</i>    | 8.285 | 9.905 | 10.105 |
| 202838_at    | <i>FUCA1</i>     | 5.09  | 6.2   | 6.1    |
| 209486_at    | <i>SAS10</i>     | 7.97  | 9.72  | 9.54   |
| 1555216_a_at | <i>LOC645722</i> | 5.15  | 6.18  | 6.27   |
| 47773_at     | <i>FBXO42</i>    | 4.83  | 5.83  | 5.84   |
| 215629_s_at  | <i>KIAA1799</i>  | 3.84  | 4.66  | 4.62   |
| 222048_at    | <i>ADRBK2</i>    | 4.325 | 5.205 | 5.255  |
| 213694_at    | <i>RSBN1</i>     | 6.815 | 8.285 | 8.195  |
| 45288_at     | <i>ABHD6</i>     | 3.985 | 4.825 | 4.815  |
| 51774_s_at   | <i>MGCI3098</i>  | 4.165 | 5.005 | 5.085  |
| 218296_x_at  | <i>MSTO1</i>     | 3.61  | 4.4   | 4.34   |
| 224657_at    | <i>ERRF11</i>    | 9.95  | 12.14 | 11.96  |



|              |                 |       |        |        |
|--------------|-----------------|-------|--------|--------|
| 223058_at    | <i>FAM107B</i>  | 7.2   | 8.68   | 8.76   |
| 205770_at    | <i>GSR</i>      | 2.525 | 3.035  | 3.095  |
| 201440_at    | <i>DDX23</i>    | 4.835 | 5.875  | 5.845  |
| 225222_at    | <i>HIAT1</i>    | 8.495 | 10.405 | 10.195 |
| 224956_at    | <i>NUFIP2</i>   | 7.71  | 9.43   | 9.28   |
| 220239_at    | <i>KLHL7</i>    | 6.485 | 7.855  | 7.885  |
| 227129_x_at  | <i>FLJ45340</i> | 3.92  | 4.76   | 4.76   |
| 202301_s_at  | <i>RSRC2</i>    | 7.725 | 9.365  | 9.405  |
| 228273_at    | <i>NA</i>       | 7.665 | 9.375  | 9.275  |
| 224859_at    | <i>CD276</i>    | 6.235 | 7.655  | 7.525  |
| 201626_at    | <i>INSIG1</i>   | 9.825 | 12.025 | 11.895 |
| 1555543_a_at | <i>CLCC1</i>    | 4.245 | 5.195  | 5.135  |
| 213144_at    | <i>GOSR2</i>    | 4.31  | 5.28   | 5.21   |
| 230091_at    | <i>SRPK2</i>    | 5.9   | 7.11   | 7.25   |
| 233842_x_at  | <i>C20orf43</i> | 5.27  | 6.37   | 6.45   |
| 238823_at    | <i>FMNL3</i>    | 4.745 | 5.735  | 5.825  |
| 218982_s_at  | <i>MRPS17</i>   | 6.16  | 7.46   | 7.55   |
| 219819_s_at  | <i>MRPS28</i>   | 5.815 | 7.095  | 7.095  |
| 209298_s_at  | <i>ITSN1</i>    | 6.075 | 7.435  | 7.385  |
| 243648_at    | <i>ZC3H11A</i>  | 6.165 | 7.555  | 7.485  |
| 208689_s_at  | <i>RPN2</i>     | 8.13  | 9.84   | 9.98   |
| 226315_at    | <i>CCDC16</i>   | 7.36  | 8.94   | 9.01   |
| 222573_s_at  | <i>SAVI</i>     | 4.65  | 5.68   | 5.66   |
| 204970_s_at  | <i>MAFG</i>     | 7.15  | 8.78   | 8.68   |
| 212123_at    | <i>C10orf61</i> | 5.48  | 6.66   | 6.73   |
| 223287_s_at  | <i>FOXPI</i>    | 7.325 | 9.005  | 8.885  |
| 234982_at    | <i>ZNF650</i>   | 7.31  | 9.02   | 8.84   |
| 204162_at    | <i>KNTC2</i>    | 6.25  | 7.64   | 7.63   |
| 218089_at    | <i>C20orf4</i>  | 5.32  | 6.49   | 6.51   |
| 1555780_a_at | <i>RHEB</i>     | 6.645 | 8.095  | 8.145  |
| 219001_s_at  | <i>WDR32</i>    | 5.7   | 6.99   | 6.94   |

|             |                  |       |       |       |
|-------------|------------------|-------|-------|-------|
| 213161_at   | <i>C9orf97</i>   | 6.515 | 8.035 | 7.905 |
| 202032_s_at | <i>MAN2A2</i>    | 5.74  | 6.96  | 7.08  |
| 243020_at   | <i>FAM13A1OS</i> | 3.39  | 4.14  | 4.15  |
| 204175_at   | <i>ZNF593</i>    | 2.52  | 3.06  | 3.11  |
| 218845_at   | <i>DUSP22</i>    | 6.88  | 8.49  | 8.35  |
| 219016_at   | <i>FASTKD5</i>   | 5.505 | 6.755 | 6.695 |
| 224818_at   | <i>SORT1</i>     | 7.205 | 8.795 | 8.825 |
| 244647_at   | <i>NA</i>        | 3.72  | 4.55  | 4.56  |
| 202694_at   | <i>STK17A</i>    | 5.97  | 7.36  | 7.26  |
| 208772_at   | <i>ANKHD1</i>    | 6.33  | 7.72  | 7.79  |
| 218371_s_at | <i>PSPC1</i>     | 6.805 | 8.345 | 8.335 |
| 230508_at   | <i>DKK3</i>      | 5.53  | 6.75  | 6.79  |
| 201114_x_at | <i>PSMA7</i>     | 7.92  | 9.64  | 9.77  |
| 239348_at   | <i>USP31</i>     | 2.785 | 3.385 | 3.435 |
| 218514_at   | <i>C17orf71</i>  | 5.865 | 7.145 | 7.235 |
| 1569167_at  | <i>COMMD10</i>   | 2.59  | 3.2   | 3.14  |
| 224773_at   | <i>NAV1</i>      | 7.005 | 8.685 | 8.495 |
| 208994_s_at | <i>PPIG</i>      | 6.565 | 7.995 | 8.125 |
| 204949_at   | <i>ICAM3</i>     | 4.525 | 5.565 | 5.535 |
| 213383_at   | <i>NA</i>        | 4.785 | 5.925 | 5.805 |
| 213954_at   | <i>KIAA0888</i>  | 2.955 | 3.635 | 3.625 |
| 202084_s_at | <i>SEC14L1</i>   | 9.14  | 11.3  | 11.14 |
| 1566968_at  | <i>SPRY4</i>     | 5.045 | 6.145 | 6.235 |
| 221853_s_at | <i>NOMO3</i>     | 7.34  | 9.12  | 8.92  |
| 206118_at   | <i>STAT4</i>     | 2.53  | 3.11  | 3.11  |
| 210010_s_at | <i>SLC25A1</i>   | 3.625 | 4.465 | 4.435 |
| 202024_at   | <i>ASNA1</i>     | 5.505 | 6.815 | 6.725 |
| 225112_at   | <i>ABI2</i>      | 8.18  | 10.1  | 10.02 |
| 202304_at   | <i>FND3A</i>     | 8.73  | 10.81 | 10.66 |
| 210330_at   | <i>SGCD</i>      | 7.45  | 9.19  | 9.15  |
| 226536_at   | <i>NSMCE2</i>    | 6.195 | 7.695 | 7.545 |

|             |                 |        |        |        |
|-------------|-----------------|--------|--------|--------|
| 219057_at   | <i>RABEP2</i>   | 2.725  | 3.335  | 3.385  |
| 204732_s_at | <i>TRIM23</i>   | 6.605  | 8.165  | 8.115  |
| 235696_at   | <i>NA</i>       | 4.33   | 5.35   | 5.31   |
| 225850_at   | <i>SFT2D1</i>   | 6.395  | 7.965  | 7.785  |
| 204478_s_at | <i>RABIF</i>    | 7.075  | 8.765  | 8.675  |
| 224770_s_at | <i>NAV1</i>     | 4.99   | 6.18   | 6.12   |
| 222212_s_at | <i>LASS2</i>    | 7.38   | 9.16   | 9.04   |
| 226161_at   | <i>SLC30A6</i>  | 6.755  | 8.425  | 8.245  |
| 221452_s_at | <i>TMEM14B</i>  | 7.28   | 9.07   | 8.92   |
| 212906_at   | <i>GRAMD1B</i>  | 5.43   | 6.64   | 6.78   |
| 226941_at   | <i>NA</i>       | 6.84   | 8.53   | 8.39   |
| 221583_s_at | <i>KCNMA1</i>   | 3.8    | 4.68   | 4.72   |
| 219315_s_at | <i>CI6orf30</i> | 6.63   | 8.28   | 8.13   |
| 208424_s_at | <i>CIAPIN1</i>  | 5.86   | 7.28   | 7.23   |
| 204034_at   | <i>ETHE1</i>    | 5.655  | 7.055  | 6.945  |
| 236635_at   | <i>ZNF667</i>   | 4.36   | 5.43   | 5.37   |
| 230309_at   | <i>BHMT</i>     | 4.805  | 5.905  | 5.995  |
| 227079_at   | <i>DHX8</i>     | 5.475  | 6.825  | 6.735  |
| 1552329_at  | <i>RBBP6</i>    | 3.645  | 4.565  | 4.475  |
| 224607_s_at | <i>SRP68</i>    | 7.375  | 9.215  | 9.095  |
| 229014_at   | <i>FLJ42709</i> | 5.945  | 7.355  | 7.415  |
| 212312_at   | <i>BCL2L1</i>   | 5.71   | 7.04   | 7.14   |
| 231907_at   | <i>NA</i>       | 5.63   | 7.04   | 6.95   |
| 212110_at   | <i>SLC39A14</i> | 10.345 | 12.835 | 12.855 |
| 225287_s_at | <i>TMEM55B</i>  | 5.745  | 7.155  | 7.125  |
| 222524_s_at | <i>SENP2</i>    | 4.39   | 5.47   | 5.44   |
| 224963_at   | <i>SLC26A2</i>  | 7.16   | 8.95   | 8.85   |
| 217974_at   | <i>TM7SF3</i>   | 5.26   | 6.57   | 6.51   |
| 224364_s_at | <i>PPIL3</i>    | 7.78   | 9.57   | 9.79   |
| 238733_at   | <i>CPM</i>      | 5.285  | 6.655  | 6.515  |
| 201777_s_at | <i>KIAA0494</i> | 3.13   | 3.9    | 3.89   |

|              |                 |       |       |        |
|--------------|-----------------|-------|-------|--------|
| 1556000_s_at | <i>BTBD7</i>    | 6.435 | 8.115 | 7.925  |
| 227534_at    | <i>C9orf21</i>  | 5.375 | 6.725 | 6.695  |
| 201541_s_at  | <i>ZNHIT1</i>   | 5.49  | 6.81  | 6.89   |
| 227993_at    | <i>METAP2</i>   | 7.075 | 8.895 | 8.775  |
| 1560821_at   | <i>ARHGAP22</i> | 3.08  | 3.83  | 3.85   |
| 227934_at    | <i>NA</i>       | 7.3   | 9.14  | 9.1    |
| 204464_s_at  | <i>EDNRA</i>    | 9.93  | 12.44 | 12.38  |
| 202883_s_at  | <i>PPP2R1B</i>  | 6.495 | 8.155 | 8.075  |
| 223041_at    | <i>CD99L2</i>   | 3.525 | 4.375 | 4.435  |
| 212305_s_at  | <i>MIA3</i>     | 5.19  | 6.5   | 6.48   |
| 219238_at    | <i>PIGV</i>     | 4.65  | 5.75  | 5.88   |
| 60084_at     | <i>CYLD</i>     | 2.825 | 3.555 | 3.525  |
| 200820_at    | <i>PSMD8</i>    | 6.45  | 8.12  | 8.02   |
| 208872_s_at  | <i>REEP5</i>    | 6.225 | 7.825 | 7.745  |
| 227998_at    | <i>SI00A16</i>  | 7.945 | 9.885 | 10.035 |
| 221571_at    | <i>TRAF3</i>    | 6.505 | 8.255 | 8.065  |
| 232095_at    | <i>SRGAP2</i>   | 6.735 | 8.525 | 8.355  |
| 242550_at    | <i>EIF3S9</i>   | 4.55  | 5.7   | 5.72   |
| 226183_at    | <i>NA</i>       | 5.86  | 7.31  | 7.38   |
| 229572_at    | <i>NA</i>       | 5.465 | 6.785 | 6.945  |
| 221511_x_at  | <i>CCPG1</i>    | 6.42  | 8.01  | 8.11   |
| 212809_at    | <i>NFATC2IP</i> | 4.505 | 5.725 | 5.605  |
| 239784_at    | <i>SMYD3</i>    | 4.625 | 5.825 | 5.795  |
| 236104_at    | <i>NA</i>       | 6     | 7.53  | 7.56   |
| 236402_at    | <i>NA</i>       | 4.81  | 6.09  | 6.01   |
| 225551_at    | <i>C1orf71</i>  | 6.82  | 8.52  | 8.64   |
| 219874_at    | <i>SLC12A8</i>  | 3.71  | 4.7   | 4.63   |
| 209939_x_at  | <i>CFLAR</i>    | 6.51  | 8.26  | 8.12   |
| 1560878_at   | <i>SYT15</i>    | 5.045 | 6.305 | 6.395  |
| 209311_at    | <i>BCL2L2</i>   | 5.975 | 7.515 | 7.555  |
| 225973_at    | <i>TAP2</i>     | 6.63  | 8.45  | 8.26   |

|             |                 |       |        |        |
|-------------|-----------------|-------|--------|--------|
| 235238_at   | <i>SHC4</i>     | 4.06  | 5.08   | 5.16   |
| 203063_at   | <i>PPM1F</i>    | 5.77  | 7.3    | 7.25   |
| 227755_at   | <i>NA</i>       | 7.02  | 8.87   | 8.85   |
| 209188_x_at | <i>DR1</i>      | 5.455 | 6.895  | 6.885  |
| 228569_at   | <i>PAPOLA</i>   | 6.25  | 7.89   | 7.9    |
| 209520_s_at | <i>NCBP1</i>    | 4.205 | 5.245  | 5.365  |
| 205479_s_at | <i>PLAU</i>     | 8.395 | 10.575 | 10.615 |
| 219765_at   | <i>ZNF329</i>   | 5.51  | 7.02   | 6.92   |
| 231835_at   | <i>C1orf93</i>  | 5.34  | 6.69   | 6.82   |
| 223682_s_at | <i>MGC11102</i> | 3.575 | 4.515  | 4.525  |
| 204163_at   | <i>EMILIN1</i>  | 5.28  | 6.76   | 6.63   |
| 209653_at   | <i>KPNA4</i>    | 4.86  | 6.17   | 6.15   |
| 202289_s_at | <i>TACC2</i>    | 7.41  | 9.42   | 9.4    |
| 222142_at   | <i>CYLD</i>     | 3.205 | 4.085  | 4.055  |
| 222450_at   | <i>TMEPAI</i>   | 9.34  | 11.85  | 11.87  |
| 202329_at   | <i>CSK</i>      | 6.835 | 8.695  | 8.665  |
| 235260_s_at | <i>C4orf28</i>  | 3.26  | 4.14   | 4.15   |
| 238602_at   | <i>DIS3L2</i>   | 3.715 | 4.685  | 4.755  |
| 227156_at   | <i>TNRC8</i>    | 5.975 | 7.535  | 7.685  |
| 201104_x_at | <i>NBPF14</i>   | 5.845 | 7.385  | 7.495  |
| 222658_s_at | <i>APTX</i>     | 4.715 | 6.025  | 5.975  |
| 210664_s_at | <i>TFPI</i>     | 8.575 | 11.005 | 10.825 |
| 201344_at   | <i>UBE2D2</i>   | 6.04  | 7.78   | 7.61   |
| 221563_at   | <i>DUSP10</i>   | 6.195 | 7.805  | 7.985  |
| 1554140_at  | <i>WDR78</i>    | 4.245 | 5.405  | 5.415  |
| 221437_s_at | <i>MRPS15</i>   | 4.47  | 5.65   | 5.77   |
| 228304_at   | <i>NA</i>       | 3.065 | 3.955  | 3.855  |
| 226495_at   | <i>VISA</i>     | 4.305 | 5.505  | 5.475  |
| 208821_at   | <i>SNRPB</i>    | 6.3   | 7.96   | 8.12   |
| 239024_at   | <i>SLC12A8</i>  | 5.56  | 7.08   | 7.12   |
| 225606_at   | <i>BCL2L11</i>  | 4.09  | 5.22   | 5.24   |

|              |                 |        |        |        |
|--------------|-----------------|--------|--------|--------|
| 225218_at    | <i>ZFYVE27</i>  | 4.45   | 5.71   | 5.67   |
| 219655_at    | <i>C7orf10</i>  | 5.205  | 6.565  | 6.735  |
| 226176_s_at  | <i>USP42</i>    | 5.615  | 7.285  | 7.105  |
| 204169_at    | <i>IMPDH1</i>   | 3.655  | 4.665  | 4.695  |
| 212714_at    | <i>LARP4</i>    | 7.51   | 9.54   | 9.71   |
| 225391_at    | <i>LOC93622</i> | 4.925  | 6.385  | 6.235  |
| 1553768_a_at | <i>DCBLD1</i>   | 9.315  | 11.825 | 12.075 |
| 221839_s_at  | <i>UBAP2</i>    | 5.985  | 7.665  | 7.675  |
| 217909_s_at  | <i>MLX</i>      | 4.75   | 6.03   | 6.15   |
| 1554251_at   | <i>HP1BP3</i>   | 5.38   | 6.93   | 6.87   |
| 203652_at    | <i>MAP3K11</i>  | 3.565  | 4.615  | 4.545  |
| 218347_at    | <i>TYWI</i>     | 4.615  | 5.855  | 6.015  |
| 230689_at    | <i>NA</i>       | 5.515  | 7.035  | 7.145  |
| 222156_x_at  | <i>CCPG1</i>    | 5.82   | 7.5    | 7.47   |
| 203513_at    | <i>KIAA1840</i> | 6.955  | 9.035  | 8.845  |
| 220370_s_at  | <i>USP36</i>    | 4.04   | 5.21   | 5.19   |
| 218584_at    | <i>FLJ21127</i> | 5.07   | 6.49   | 6.56   |
| 200948_at    | <i>MLF2</i>     | 6.005  | 7.655  | 7.825  |
| 226118_at    | <i>ADCY3</i>    | 3.81   | 4.84   | 4.97   |
| 217825_s_at  | <i>UBE2J1</i>   | 6.3    | 8.19   | 8.05   |
| 233878_s_at  | <i>XRN2</i>     | 4.27   | 5.49   | 5.53   |
| 210145_at    | <i>PLA2G4A</i>  | 7.27   | 9.3    | 9.44   |
| 210511_s_at  | <i>INHBA</i>    | 10.595 | 13.785 | 13.535 |
| 202132_at    | <i>WWTR1</i>    | 9.355  | 12.195 | 11.945 |
| 1555814_a_at | <i>RHOA</i>     | 4.155  | 5.285  | 5.425  |
| 1556551_s_at | <i>SLC39A6</i>  | 2.775  | 3.545  | 3.605  |
| 54970_at     | <i>ZMIZ2</i>    | 6.565  | 8.545  | 8.415  |
| 209107_x_at  | <i>NCOA1</i>    | 4.625  | 5.925  | 6.005  |
| 218973_at    | <i>EFTUD1</i>   | 6.1    | 7.84   | 7.93   |
| 238421_at    | <i>RC3H2</i>    | 3.705  | 4.785  | 4.785  |
| 200000_s_at  | <i>PRPF8</i>    | 6.8    | 8.81   | 8.79   |

|             |                  |       |       |       |
|-------------|------------------|-------|-------|-------|
| 200720_s_at | <i>ACTR1A</i>    | 4.57  | 5.94  | 5.88  |
| 202111_at   | <i>SLC4A2</i>    | 5.53  | 7.09  | 7.25  |
| 230799_at   | <i>LOC388948</i> | 5.48  | 7.1   | 7.1   |
| 212425_at   | <i>SCAMP1</i>    | 4.415 | 5.705 | 5.735 |
| 201387_s_at | <i>UCHL1</i>     | 7.165 | 9.165 | 9.415 |
| 226175_at   | <i>TTC9C</i>     | 4.36  | 5.67  | 5.65  |
| 203376_at   | <i>CDC40</i>     | 5.91  | 7.74  | 7.6   |
| 222622_at   | <i>LOC283871</i> | 2.445 | 3.205 | 3.155 |
| 224430_s_at | <i>MTO1</i>      | 5.68  | 7.35  | 7.41  |
| 208800_at   | <i>SRP72</i>     | 5.785 | 7.445 | 7.575 |
| 209044_x_at | <i>SF3B4</i>     | 4.965 | 6.485 | 6.415 |
| 1552354_at  | <i>C19orf26</i>  | 2.8   | 3.61  | 3.67  |
| 203957_at   | <i>E2F6</i>      | 5.475 | 7.195 | 7.065 |
| 225290_at   | <i>ETNK1</i>     | 6.38  | 8.22  | 8.43  |
| 222490_at   | <i>POLR3E</i>    | 5.93  | 7.75  | 7.75  |
| 225102_at   | <i>MGLL</i>      | 8.27  | 10.8  | 10.82 |
| 235363_at   | <i>NA</i>        | 3.815 | 4.995 | 4.965 |
| 202101_s_at | <i>RALB</i>      | 5.9   | 7.79  | 7.65  |
| 234998_at   | <i>NA</i>        | 5.605 | 7.285 | 7.365 |
| 1560156_at  | <i>CLEC2D</i>    | 3.285 | 4.305 | 4.295 |
| 217356_s_at | <i>PGK1</i>      | 6.675 | 8.835 | 8.645 |
| 243198_at   | <i>TEX9</i>      | 3.66  | 4.74  | 4.86  |
| 227777_at   | <i>C10orf18</i>  | 5.295 | 6.935 | 6.945 |
| 218159_at   | <i>C20orf116</i> | 6.035 | 7.965 | 7.895 |
| 209882_at   | <i>RIT1</i>      | 7.095 | 9.205 | 9.435 |
| 221988_at   | <i>CRSP7</i>     | 5.19  | 6.78  | 6.84  |
| 213279_at   | <i>DHRS1</i>     | 5.875 | 7.615 | 7.815 |
| 229509_at   | <i>MFSD8</i>     | 5.125 | 6.675 | 6.805 |
| 215235_at   | <i>SPTAN1</i>    | 6.745 | 8.885 | 8.855 |
| 239437_at   | <i>NA</i>        | 4.83  | 6.43  | 6.28  |
| 201005_at   | <i>CD9</i>       | 6.985 | 9.305 | 9.075 |

|              |                  |       |       |       |
|--------------|------------------|-------|-------|-------|
| 210754_s_at  | <i>LYN</i>       | 2.875 | 3.785 | 3.775 |
| 212756_s_at  | <i>UBR2</i>      | 5.305 | 6.965 | 7.005 |
| 212528_at    | <i>NA</i>        | 5.245 | 6.885 | 6.935 |
| 201765_s_at  | <i>HEXA</i>      | 6.885 | 9.195 | 8.965 |
| 202236_s_at  | <i>SLC16A1</i>   | 4.985 | 6.645 | 6.515 |
| 201285_at    | <i>MKRNI</i>     | 6.785 | 9.055 | 8.865 |
| 243555_at    | <i>EDNRA</i>     | 5.55  | 7.4   | 7.25  |
| 204668_at    | <i>RNF24</i>     | 3.625 | 4.845 | 4.735 |
| 219148_at    | <i>PBK</i>       | 6.435 | 8.475 | 8.545 |
| 204384_at    | <i>GOLGA2</i>    | 5.545 | 7.305 | 7.375 |
| 222789_at    | <i>RSBNI</i>     | 5.535 | 7.425 | 7.215 |
| 204725_s_at  | <i>NCK1</i>      | 3.695 | 4.915 | 4.875 |
| 203235_at    | <i>THOP1</i>     | 3.32  | 4.39  | 4.41  |
| 213895_at    | <i>EMPI</i>      | 5.39  | 7.26  | 7.04  |
| 223104_at    | <i>JAGNI</i>     | 6.085 | 8.045 | 8.095 |
| 212174_at    | <i>AK2</i>       | 4.095 | 5.505 | 5.375 |
| 1555486_a_at | <i>FLJ14213</i>  | 4.655 | 6.255 | 6.125 |
| 204190_at    | <i>USPL1</i>     | 5.15  | 6.82  | 6.88  |
| 236837_x_at  | <i>LOC650794</i> | 4.925 | 6.545 | 6.545 |
| 207483_s_at  | <i>CAND1</i>     | 7.255 | 9.715 | 9.585 |
| 219239_s_at  | <i>ZNF654</i>    | 3.27  | 4.31  | 4.39  |
| 243256_at    | <i>MKNK1</i>     | 5.07  | 6.76  | 6.74  |
| 232946_s_at  | <i>NADSYN1</i>   | 4.65  | 6.11  | 6.27  |
| 218051_s_at  | <i>NT5DC2</i>    | 3.17  | 4.25  | 4.2   |
| 219798_s_at  | <i>BCDIN3</i>    | 4.87  | 6.41  | 6.57  |
| 1552853_at   | <i>FLJ32784</i>  | 2.54  | 3.39  | 3.38  |
| 223306_at    | <i>EBPL</i>      | 6.015 | 8.005 | 8.025 |
| 215195_at    | <i>PRKCA</i>     | 4.97  | 6.66  | 6.6   |
| 223575_at    | <i>KIAA1549</i>  | 3.99  | 5.31  | 5.35  |
| 222777_s_at  | <i>WHSC1</i>     | 4.88  | 6.46  | 6.57  |
| 225440_at    | <i>AGPAT3</i>    | 5.055 | 6.815 | 6.695 |



|             |                 |       |       |       |
|-------------|-----------------|-------|-------|-------|
| 236620_at   | <i>RIF1</i>     | 6.045 | 8.055 | 8.075 |
| 215497_s_at | <i>WDTC1</i>    | 2.685 | 3.595 | 3.585 |
| 225747_at   | <i>COQ10A</i>   | 4.04  | 5.32  | 5.48  |
| 202168_at   | <i>TAF9</i>     | 5.285 | 7.155 | 7.015 |
| 222088_s_at | <i>SLC2A3</i>   | 4.95  | 6.71  | 6.55  |
| 229732_at   | <i>HSZFP36</i>  | 4.555 | 6.185 | 6.015 |
| 218896_s_at | <i>CI7orf85</i> | 5.7   | 7.76  | 7.52  |
| 209412_at   | <i>TMEM1</i>    | 5.63  | 7.59  | 7.52  |
| 228323_at   | <i>CASC5</i>    | 5.1   | 6.89  | 6.79  |
| 206926_s_at | <i>IL11</i>     | 5.465 | 7.225 | 7.455 |
| 200900_s_at | <i>M6PR</i>     | 5.595 | 7.635 | 7.405 |
| 230779_at   | <i>TNRC6B</i>   | 5.94  | 7.9   | 8.1   |
| 210191_s_at | <i>PHTF1</i>    | 4.96  | 6.69  | 6.67  |
| 218951_s_at | <i>PLCXD1</i>   | 5.505 | 7.425 | 7.395 |
| 224711_at   | <i>YY1</i>      | 7.21  | 9.58  | 9.84  |
| 229441_at   | <i>PRSS23</i>   | 6.64  | 8.98  | 8.93  |
| 222609_s_at | <i>EXOSC1</i>   | 5.315 | 7.195 | 7.145 |
| 212211_at   | <i>ANKRD17</i>  | 5.075 | 6.785 | 6.915 |
| 203554_x_at | <i>PTTG1</i>    | 6.515 | 8.715 | 8.875 |
| 209605_at   | <i>TST</i>      | 5.12  | 6.96  | 6.87  |
| 215482_s_at | <i>EIF2B4</i>   | 4.62  | 6.26  | 6.22  |
| 216212_s_at | <i>DKC1</i>     | 5.745 | 7.785 | 7.755 |
| 229240_at   | <i>ZDHHC21</i>  | 3.765 | 5.015 | 5.165 |
| 224186_s_at | <i>RNF123</i>   | 3.765 | 5.025 | 5.175 |
| 212428_at   | <i>KIAA0368</i> | 6.295 | 8.555 | 8.475 |
| 204434_at   | <i>SPATA2</i>   | 4.75  | 6.35  | 6.51  |
| 212548_s_at | <i>FRYL</i>     | 5.77  | 7.9   | 7.72  |
| 229873_at   | <i>KCTD21</i>   | 4.115 | 5.595 | 5.545 |
| 213142_x_at | <i>LOC54103</i> | 4.74  | 6.41  | 6.43  |
| 218312_s_at | <i>ZSCAN18</i>  | 5.04  | 6.83  | 6.85  |
| 242606_at   | <i>NA</i>       | 4.955 | 6.625 | 6.835 |

|              |                  |       |        |        |
|--------------|------------------|-------|--------|--------|
| 201946_s_at  | <i>CCT2</i>      | 5.565 | 7.615  | 7.505  |
| 202859_x_at  | <i>IL8</i>       | 8.815 | 11.805 | 12.175 |
| 212912_at    | <i>RPS6KA2</i>   | 5.86  | 7.98   | 7.97   |
| 211501_s_at  | <i>EIF3S9</i>    | 6.005 | 8.165  | 8.205  |
| 205787_x_at  | <i>LOC441155</i> | 4.605 | 6.335  | 6.205  |
| 1556582_at   | <i>NA</i>        | 3.71  | 5.05   | 5.05   |
| 231766_s_at  | <i>COL12A1</i>   | 6.93  | 9.46   | 9.44   |
| 201066_at    | <i>CYC1</i>      | 5.205 | 7.145  | 7.025  |
| 244832_at    | <i>EDNRA</i>     | 5.38  | 7.24   | 7.43   |
| 223707_at    | <i>MGC10850</i>  | 6.345 | 8.545  | 8.775  |
| 235205_at    | <i>LOC346887</i> | 5.55  | 7.51   | 7.67   |
| 200622_x_at  | <i>CALM3</i>     | 5.44  | 7.42   | 7.46   |
| 228563_at    | <i>GJA7</i>      | 5.665 | 7.645  | 7.875  |
| 211061_s_at  | <i>MGAT2</i>     | 5.805 | 8.075  | 7.825  |
| 227741_at    | <i>PTPLB</i>     | 6.16  | 8.4    | 8.48   |
| 201101_s_at  | <i>BCLAF1</i>    | 5.52  | 7.5    | 7.65   |
| 208308_s_at  | <i>GPI</i>       | 5.48  | 7.61   | 7.43   |
| 1555862_s_at | <i>MICALL2</i>   | 3.565 | 4.855  | 4.945  |
| 239355_at    | <i>GMCL1</i>     | 5.425 | 7.495  | 7.405  |
| 201020_at    | <i>YWHAH</i>     | 3.87  | 5.25   | 5.38   |
| 211762_s_at  | <i>KPNA2</i>     | 7.075 | 9.765  | 9.675  |
| 227945_at    | <i>TBC1D1</i>    | 4.73  | 6.51   | 6.51   |
| 244025_at    | <i>NA</i>        | 3.255 | 4.435  | 4.515  |
| 218679_s_at  | <i>VPS28</i>     | 4.905 | 6.675  | 6.815  |
| 1557450_s_at | <i>WHDC1L1</i>   | 5.165 | 7.005  | 7.205  |
| 226076_s_at  | <i>MBD6</i>      | 3.575 | 4.895  | 4.945  |
| 239730_at    | <i>NA</i>        | 3.44  | 4.79   | 4.69   |
| 224728_at    | <i>ATPAF1</i>    | 4.565 | 6.275  | 6.335  |
| 226298_at    | <i>RUNDC1</i>    | 4.84  | 6.65   | 6.71   |
| 238417_at    | <i>PGM2L1</i>    | 6.065 | 8.455  | 8.285  |
| 222421_at    | <i>UBE2H</i>     | 6.33  | 8.81   | 8.69   |

|              |                  |       |       |       |
|--------------|------------------|-------|-------|-------|
| 204570_at    | <i>COX7A1</i>    | 6.085 | 8.415 | 8.425 |
| 240854_x_at  | <i>NA</i>        | 5.44  | 7.48  | 7.57  |
| 212354_at    | <i>SULF1</i>     | 9.39  | 13.01 | 12.97 |
| 205493_s_at  | <i>DPYSL4</i>    | 3.74  | 5.26  | 5.09  |
| 232149_s_at  | <i>NSMAF</i>     | 4.12  | 5.74  | 5.66  |
| 212065_s_at  | <i>USP34</i>     | 3.05  | 4.26  | 4.21  |
| 238597_at    | <i>ANKRD13C</i>  | 4.14  | 5.86  | 5.66  |
| 209797_at    | <i>TMEM4</i>     | 6.185 | 8.615 | 8.565 |
| 204905_s_at  | <i>EEF1E1</i>    | 6.08  | 8.33  | 8.59  |
| 203149_at    | <i>PVRL2</i>     | 4.67  | 6.5   | 6.51  |
| 1561908_a_at | <i>HS3ST3B1</i>  | 7.86  | 10.91 | 10.97 |
| 225390_s_at  | <i>KLF13</i>     | 6.945 | 9.835 | 9.535 |
| 1555326_a_at | <i>ADAM9</i>     | 3.625 | 5.005 | 5.095 |
| 220580_at    | <i>BICC1</i>     | 2.445 | 3.425 | 3.395 |
| 212321_at    | <i>SGPL1</i>     | 4.39  | 6.08  | 6.18  |
| 203742_s_at  | <i>TDG</i>       | 4.53  | 6.3   | 6.36  |
| 222262_s_at  | <i>ETNK1</i>     | 5.495 | 7.745 | 7.635 |
| 204283_at    | <i>FARS2</i>     | 4.65  | 6.4   | 6.61  |
| 212079_s_at  | <i>MLL</i>       | 2.87  | 3.98  | 4.04  |
| 221260_s_at  | <i>FAM130A1</i>  | 5.905 | 8.405 | 8.135 |
| 224929_at    | <i>TMEM173</i>   | 4.52  | 6.29  | 6.39  |
| 226391_at    | <i>NDUFB2</i>    | 4.35  | 6.05  | 6.18  |
| 204160_s_at  | <i>ENPP4</i>     | 4.02  | 5.61  | 5.71  |
| 234726_s_at  | <i>TMEM168</i>   | 3.36  | 4.7   | 4.78  |
| 229492_at    | <i>VANGL1</i>    | 3.7   | 5.22  | 5.22  |
| 209020_at    | <i>C20orf111</i> | 4.06  | 5.71  | 5.77  |
| 242294_at    | <i>NA</i>        | 3.335 | 4.685 | 4.745 |
| 205514_at    | <i>ZNF415</i>    | 4.1   | 5.85  | 5.75  |
| 213552_at    | <i>GLCE</i>      | 5.855 | 8.325 | 8.235 |
| 205726_at    | <i>DIAPH2</i>    | 5.625 | 8.085 | 7.855 |
| 226305_at    | <i>LYNX1</i>     | 3.455 | 4.875 | 4.925 |

|              |                  |       |        |        |
|--------------|------------------|-------|--------|--------|
| 214439_x_at  | <i>BINI</i>      | 3.78  | 5.28   | 5.44   |
| 227844_at    | <i>FMNL3</i>     | 2.62  | 3.67   | 3.77   |
| 213933_at    | <i>PTGER3</i>    | 6.69  | 9.39   | 9.62   |
| 238437_at    | <i>ZNF805</i>    | 4.065 | 5.855  | 5.705  |
| 242618_at    | <i>TRIM26</i>    | 4.06  | 5.84   | 5.71   |
| 226897_s_at  | <i>ZC3H7A</i>    | 4.555 | 6.555  | 6.395  |
| 219679_s_at  | <i>WAC</i>       | 2.955 | 4.265  | 4.165  |
| 228257_at    | <i>ANKRD52</i>   | 4.55  | 6.57   | 6.41   |
| 201042_at    | <i>TGM2</i>      | 6.245 | 8.795  | 9.015  |
| 204772_s_at  | <i>TTF1</i>      | 3.185 | 4.615  | 4.475  |
| 74694_s_at   | <i>RABEP2</i>    | 4.88  | 7.08   | 6.88   |
| 214866_at    | <i>PLAUR</i>     | 5.205 | 7.435  | 7.485  |
| 223651_x_at  | <i>CDC23</i>     | 4.695 | 6.645  | 6.825  |
| 1553605_a_at | <i>ABCA13</i>    | 3.295 | 4.805  | 4.635  |
| 242705_x_at  | <i>NA</i>        | 5.825 | 8.375  | 8.325  |
| 211009_s_at  | <i>ZNF271</i>    | 5.19  | 7.49   | 7.4    |
| 204404_at    | <i>SLC12A2</i>   | 4.415 | 6.445  | 6.255  |
| 204463_s_at  | <i>EDNRA</i>     | 7.775 | 11.235 | 11.225 |
| 219006_at    | <i>C6orf66</i>   | 5.66  | 8.31   | 8.06   |
| 1557852_at   | <i>PHC2</i>      | 3.515 | 5.095  | 5.065  |
| 214453_s_at  | <i>IFI44</i>     | 4.445 | 6.385  | 6.465  |
| 204021_s_at  | <i>PURA</i>      | 5.555 | 8.185  | 7.925  |
| 227122_at    | <i>ZNF564</i>    | 4.78  | 6.88   | 6.99   |
| 218556_at    | <i>ORMDL2</i>    | 3.76  | 5.42   | 5.49   |
| 209408_at    | <i>KIF2C</i>     | 4.55  | 6.5    | 6.71   |
| 225241_at    | <i>CCDC80</i>    | 6.955 | 10.085 | 10.115 |
| 37079_at     | <i>YDD19</i>     | 3.07  | 4.47   | 4.46   |
| 219342_at    | <i>CASDI</i>     | 4.26  | 6.14   | 6.26   |
| 224469_s_at  | <i>C14orf151</i> | 3.975 | 5.865  | 5.715  |
| 1569263_at   | <i>SLC16A3</i>   | 3.04  | 4.39   | 4.48   |
| 217861_s_at  | <i>PREB</i>      | 4.135 | 6.105  | 5.995  |

|              |                 |       |        |        |
|--------------|-----------------|-------|--------|--------|
| 235016_at    | <i>REEP3</i>    | 3.32  | 4.96   | 4.77   |
| 1555789_s_at | <i>PHF23</i>    | 2.69  | 3.93   | 3.98   |
| 202063_s_at  | <i>SEL1L</i>    | 3.78  | 5.57   | 5.55   |
| 219555_s_at  | <i>CENPN</i>    | 4.88  | 7.16   | 7.2    |
| 213448_at    | <i>MTX1</i>     | 4.44  | 6.6    | 6.44   |
| 236117_at    | <i>NA</i>       | 3.86  | 5.62   | 5.73   |
| 204976_s_at  | <i>AMMECRI</i>  | 5.435 | 8.135  | 7.885  |
| 1553718_at   | <i>ZNF548</i>   | 6.95  | 10.44  | 10.03  |
| 223314_at    | <i>NUPL1</i>    | 2.82  | 4.08   | 4.24   |
| 225582_at    | <i>KIAA1754</i> | 5.16  | 7.58   | 7.66   |
| 205924_at    | <i>RAB3B</i>    | 3.99  | 6      | 5.78   |
| 209902_at    | <i>ATR</i>      | 5.205 | 7.805  | 7.595  |
| 215617_at    | <i>NA</i>       | 3.145 | 4.555  | 4.735  |
| 210845_s_at  | <i>PLAUR</i>    | 5.775 | 8.665  | 8.435  |
| 236476_at    | <i>MTCP1</i>    | 4.47  | 6.6    | 6.66   |
| 212353_at    | <i>SULF1</i>    | 9.17  | 13.81  | 13.41  |
| 225791_at    | <i>UBE2F</i>    | 4.065 | 6.045  | 6.035  |
| 221489_s_at  | <i>SPRY4</i>    | 4.875 | 7.365  | 7.135  |
| 206376_at    | <i>SLC6A15</i>  | 5.33  | 8.09   | 7.77   |
| 212051_at    | <i>WIPF2</i>    | 5.25  | 7.76   | 7.86   |
| 201422_at    | <i>IFI30</i>    | 4.38  | 6.45   | 6.59   |
| 209213_at    | <i>CBRI</i>     | 3.37  | 5.08   | 4.98   |
| 228177_at    | <i>CREBBP</i>   | 3.685 | 5.435  | 5.575  |
| 201467_s_at  | <i>NQO1</i>     | 5.73  | 8.41   | 8.69   |
| 221477_s_at  | <i>MGC5618</i>  | 6.9   | 10.37  | 10.23  |
| 212432_at    | <i>GRPEL1</i>   | 5.115 | 7.755  | 7.545  |
| 225446_at    | <i>BRWD1</i>    | 4.12  | 6.12   | 6.2    |
| 1565483_at   | <i>EGFR</i>     | 6.955 | 10.515 | 10.275 |
| 226833_at    | <i>CYB5D1</i>   | 4.23  | 6.35   | 6.31   |
| 208078_s_at  | <i>ZEB1</i>     | 3.25  | 4.83   | 4.91   |
| 225915_at    | <i>CAB39L</i>   | 4.87  | 7.21   | 7.41   |

|              |                  |       |       |       |
|--------------|------------------|-------|-------|-------|
| 238969_at    | <i>C3orf55</i>   | 4.14  | 6.25  | 6.19  |
| 1552695_a_at | <i>SLC2A13</i>   | 4.89  | 7.46  | 7.24  |
| 230949_at    | <i>SLC23A3</i>   | 2.54  | 3.81  | 3.83  |
| 230240_at    | <i>DYRK3</i>     | 4.64  | 7.09  | 6.87  |
| 200615_s_at  | <i>AP2B1</i>     | 4.35  | 6.51  | 6.59  |
| 1554423_a_at | <i>FBXO7</i>     | 4.21  | 6.25  | 6.42  |
| 210253_at    | <i>HTATIP2</i>   | 3.16  | 4.77  | 4.75  |
| 213223_at    | <i>RPL28</i>     | 4.285 | 6.455 | 6.475 |
| 202109_at    | <i>ARFIP2</i>    | 3.52  | 5.22  | 5.42  |
| 205414_s_at  | <i>KIAA0672</i>  | 5.415 | 8.165 | 8.225 |
| 1569868_s_at | <i>EME2</i>      | 4.755 | 7.265 | 7.155 |
| 218867_s_at  | <i>C12orf49</i>  | 4.985 | 7.645 | 7.445 |
| 1568877_a_at | <i>ACBD5</i>     | 4.245 | 6.365 | 6.495 |
| 202263_at    | <i>CYB5R1</i>    | 4.15  | 6.28  | 6.33  |
| 214099_s_at  | <i>PDE4DIP</i>   | 2.705 | 4.165 | 4.055 |
| 230300_at    | <i>NA</i>        | 5.645 | 8.635 | 8.545 |
| 208079_s_at  | <i>AURKA</i>     | 5.85  | 8.85  | 9.02  |
| 205512_s_at  | <i>AIFM1</i>     | 4.65  | 7.1   | 7.12  |
| 203162_s_at  | <i>KATNB1</i>    | 5.29  | 8.2   | 8.02  |
| 209758_s_at  | <i>MFAP5</i>     | 7.86  | 12.23 | 11.9  |
| 228555_at    | <i>CAMK2D</i>    | 4.95  | 7.59  | 7.6   |
| 235251_at    | <i>NA</i>        | 5.155 | 7.965 | 7.875 |
| 222806_s_at  | <i>C11orf30</i>  | 3.35  | 5.18  | 5.12  |
| 201678_s_at  | <i>C3orf37</i>   | 4.965 | 7.535 | 7.745 |
| 208627_s_at  | <i>YBX1</i>      | 6.235 | 9.495 | 9.725 |
| 226331_at    | <i>NA</i>        | 4.25  | 6.45  | 6.66  |
| 227067_x_at  | <i>NBPF1</i>     | 4.56  | 7.17  | 6.91  |
| 237460_x_at  | <i>LOC283551</i> | 2.625 | 4.005 | 4.115 |
| 231319_x_at  | <i>KIF9</i>      | 4.44  | 6.87  | 6.85  |
| 232441_at    | <i>KRR1</i>      | 5.245 | 8.055 | 8.185 |
| 238756_at    | <i>GAS2L3</i>    | 5.045 | 7.905 | 7.745 |

|             |                 |       |        |        |
|-------------|-----------------|-------|--------|--------|
| 210621_s_at | <i>RASAI</i>    | 5.7   | 8.86   | 8.86   |
| 243931_at   | <i>CD58</i>     | 3.73  | 5.69   | 5.9    |
| 210375_at   | <i>PTGER3</i>   | 5.93  | 9.14   | 9.28   |
| 222587_s_at | <i>GALNT7</i>   | 3.94  | 6.16   | 6.11   |
| 231384_at   | <i>NA</i>       | 3.72  | 5.91   | 5.69   |
| 203153_at   | <i>IFIT1</i>    | 3.04  | 4.84   | 4.64   |
| 239863_at   | <i>NA</i>       | 3.755 | 5.735  | 5.975  |
| 211756_at   | <i>PTHLH</i>    | 6.485 | 10.265 | 9.985  |
| 217944_at   | <i>POMGNT1</i>  | 4.31  | 6.88   | 6.62   |
| 223596_at   | <i>SLC12A6</i>  | 2.86  | 4.57   | 4.39   |
| 228314_at   | <i>LRRC8C</i>   | 3.315 | 5.275  | 5.145  |
| 212344_at   | <i>SULF1</i>    | 6.245 | 9.745  | 9.895  |
| 204157_s_at | <i>KIAA0999</i> | 3.995 | 6.415  | 6.165  |
| 209755_at   | <i>NMNAT2</i>   | 2.1   | 3.27   | 3.33   |
| 231986_at   | <i>RIMS1</i>    | 3.775 | 6.075  | 5.835  |
| 230645_at   | <i>FRMD3</i>    | 6.665 | 10.725 | 10.255 |
| 222506_at   | <i>LMBR1</i>    | 3.18  | 5.11   | 4.92   |
| 226273_at   | <i>NA</i>       | 2.7   | 4.23   | 4.29   |
| 208699_x_at | <i>TKT</i>      | 3.09  | 4.93   | 4.82   |
| 242476_at   | <i>NA</i>       | 4.42  | 6.87   | 7.17   |
| 238681_at   | <i>GDPD1</i>    | 3.405 | 5.385  | 5.425  |
| 201009_s_at | <i>TXNIP</i>    | 4.84  | 7.76   | 7.64   |
| 219816_s_at | <i>RBM23</i>    | 4.485 | 7.295  | 6.995  |
| 225687_at   | <i>FAM83D</i>   | 3.945 | 6.345  | 6.255  |
| 210236_at   | <i>PPFIA1</i>   | 3.075 | 4.905  | 4.895  |
| 242286_at   | <i>NA</i>       | 3.19  | 5.1    | 5.08   |
| 219558_at   | <i>ATP13A3</i>  | 4.775 | 7.725  | 7.545  |
| 225834_at   | <i>NA</i>       | 3.875 | 6.285  | 6.135  |
| 210563_x_at | <i>CFLAR</i>    | 4.395 | 7.155  | 6.985  |
| 1556773_at  | <i>PTHLH</i>    | 4.64  | 7.37   | 7.55   |
| 203392_s_at | <i>CTBP1</i>    | 3.295 | 5.225  | 5.375  |

|              |                      |       |       |       |
|--------------|----------------------|-------|-------|-------|
| 1559954_s_at | <i>DDX42</i>         | 4.415 | 7.025 | 7.215 |
| 226605_at    | <i>SLC26A1</i>       | 4.73  | 7.75  | 7.54  |
| 211924_s_at  | <i>PLAUR</i>         | 4.805 | 7.705 | 7.835 |
| 224685_at    | <i>MLLT4</i>         | 4.42  | 7.01  | 7.35  |
| 225803_at    | <i>FBXO32</i>        | 5.49  | 8.89  | 8.97  |
| 225926_at    | <i>VTIIB</i>         | 3.98  | 6.6   | 6.39  |
| 228931_at    | <i>COQ4</i>          | 4.81  | 7.87  | 7.87  |
| 229256_at    | <i>PGM2L1</i>        | 5.95  | 9.87  | 9.66  |
| 201191_at    | <i>PITPNA</i>        | 4.315 | 7.075 | 7.085 |
| 211595_s_at  | <i>MRPS11</i>        | 3.22  | 5.27  | 5.33  |
| 203320_at    | <i>SH2B3</i>         | 6.19  | 10.29 | 10.1  |
| 220202_s_at  | <i>RC3H2</i>         | 3.66  | 6.03  | 6.05  |
| 241762_at    | <i>FBXO32</i>        | 5.59  | 9.08  | 9.46  |
| 44065_at     | <i>C12orf52</i>      | 3.75  | 6.33  | 6.1   |
| 202519_at    | <i>MLXIP</i>         | 4.7   | 7.82  | 7.75  |
| 232345_at    | <i>C18orf8</i>       | 2.805 | 4.595 | 4.735 |
| 228507_at    | <i>NA</i>            | 5.49  | 9.02  | 9.44  |
| 212472_at    | <i>MICAL2</i>        | 4.825 | 8.215 | 8.225 |
| 206167_s_at  | <i>ARHGAP6</i>       | 4.31  | 7.16  | 7.53  |
| 218258_at    | <i>POLRID</i>        | 4.26  | 7.4   | 7.21  |
| 213524_s_at  | <i>G0S2</i>          | 4.695 | 7.995 | 8.195 |
| 221523_s_at  | <i>RRAGD</i>         | 3.12  | 5.38  | 5.42  |
| 222150_s_at  | <i>LOC54103</i>      | 3.24  | 5.62  | 5.65  |
| 201394_s_at  | <i>RBM5</i>          | 3.695 | 6.295 | 6.605 |
| 221667_s_at  | <i>HSPB8</i>         | 5.11  | 8.95  | 8.91  |
| 224461_s_at  | <i>AIFM2</i>         | 4.595 | 8.065 | 8.075 |
| 227006_at    | <i>PPP1R14A</i>      | 3.035 | 5.435 | 5.235 |
| 32094_at     | <i>CHST3</i>         | 4.255 | 7.385 | 7.635 |
| 224252_s_at  | <i>FXVD5</i>         | 2.7   | 4.83  | 4.73  |
| 226278_at    | <i>DKFZp313A2432</i> | 4.365 | 7.845 | 7.635 |
| 238649_at    | <i>PITPNC1</i>       | 4.33  | 7.71  | 7.76  |



|              |                  |       |        |       |
|--------------|------------------|-------|--------|-------|
| 237058_x_at  | <i>SLC6A13</i>   | 3.55  | 6.48   | 6.34  |
| 1559067_a_at | <i>NA</i>        | 2.89  | 5.27   | 5.23  |
| 217901_at    | <i>DSG2</i>      | 4.22  | 7.61   | 7.71  |
| 1564069_at   | <i>NA</i>        | 2.545 | 4.675  | 4.545 |
| 202643_s_at  | <i>TNFAIP3</i>   | 3.785 | 6.935  | 6.805 |
| 204962_s_at  | <i>CENPA</i>     | 4.06  | 7.44   | 7.36  |
| 225328_at    | <i>NA</i>        | 5.515 | 10.095 | 9.975 |
| 200806_s_at  | <i>HSPD1</i>     | 3.79  | 7.11   | 6.75  |
| 206022_at    | <i>NDP</i>       | 2.61  | 4.68   | 4.9   |
| 206298_at    | <i>ARHGAP22</i>  | 4.99  | 9.28   | 9.14  |
| 228981_at    | <i>TMEM169</i>   | 2.28  | 4.13   | 4.32  |
| 225863_s_at  | <i>C19orf12</i>  | 3.89  | 7.37   | 7.17  |
| 224916_at    | <i>TMEM173</i>   | 4.215 | 7.955  | 7.965 |
| 203764_at    | <i>DLG7</i>      | 3.8   | 7.21   | 7.58  |
| 228499_at    | <i>PFKFB4</i>    | 3.53  | 6.98   | 6.8   |
| 206943_at    | <i>TGFBR1</i>    | 3.17  | 6.35   | 6.03  |
| 242389_at    | <i>CROP</i>      | 4.125 | 7.985  | 8.385 |
| 213256_at    | <i>3-Mar</i>     | 3.56  | 6.9    | 7.26  |
| 201695_s_at  | <i>NP</i>        | 4.27  | 8.99   | 8.67  |
| 225345_s_at  | <i>NA</i>        | 4.015 | 8.315  | 8.405 |
| 205282_at    | <i>LRP8</i>      | 3.465 | 7.115  | 7.375 |
| 210367_s_at  | <i>PTGES</i>     | 4.415 | 9.245  | 9.295 |
| 216235_s_at  | <i>EDNRA</i>     | 3.355 | 7.065  | 7.055 |
| 202626_s_at  | <i>LYN</i>       | 2.59  | 5.63   | 5.42  |
| 1552712_a_at | <i>NMNAT2</i>    | 2.665 | 5.865  | 5.555 |
| 216804_s_at  | <i>PDLIM5</i>    | 3.35  | 7.18   | 7.24  |
| 206300_s_at  | <i>PTHLH</i>     | 3.5   | 7.79   | 7.38  |
| 226368_at    | <i>CHST11</i>    | 4.315 | 9.975  | 9.345 |
| 237563_s_at  | <i>LOC440731</i> | 2.715 | 6.345  | 6.335 |
| 226372_at    | <i>CHST11</i>    | 3.225 | 7.925  | 7.395 |
| 1563947_a_at | <i>ERC1</i>      | 2.655 | 6.505  | 6.245 |

|           |                     |      |      |      |
|-----------|---------------------|------|------|------|
| 203066_at | <i>GALNAC4S-6ST</i> | 3.24 | 8.21 | 7.95 |
| 231666_at | <i>PAX3</i>         | 2.62 | 6.72 | 6.4  |
| 212311_at | <i>KIAA0746</i>     | 2.16 | 5.95 | 5.89 |
| 205419_at | <i>EBI2</i>         | 2.63 | 8.27 | 7.79 |
| 228640_at | <i>NA</i>           | 2.39 | 8.05 | 8.48 |

**Supplementary Table S4** Enrichment in biological process GO-terms (all levels) of upregulated expressed genes ( $q < 0.05$  and fold change  $> 2$ ) in SIOD compared to control human skin fibroblasts.

| <b>Term</b>                                                  | <b>Count</b> | <b>PValue</b> | <b>Fold Enrichment</b> |
|--------------------------------------------------------------|--------------|---------------|------------------------|
| GO:0009987~cellular process                                  | 401          | 3.81E-06      | 1.114107687            |
| GO:0008152~metabolic process                                 | 292          | 0.002569399   | 1.118294973            |
| GO:0044237~cellular metabolic process                        | 265          | 2.59E-04      | 1.169510453            |
| GO:0044238~primary metabolic process                         | 265          | 0.005201134   | 1.121027209            |
| GO:0043170~macromolecule metabolic process                   | 229          | 9.89E-04      | 1.174529652            |
| GO:0044260~cellular macromolecule metabolic process          | 216          | 2.30E-04      | 1.213241719            |
| GO:0060255~regulation of macromolecule metabolic process     | 128          | 0.046000907   | 1.150244646            |
| GO:0019538~protein metabolic process                         | 123          | 0.001809831   | 1.281015565            |
| GO:0016043~cellular component organization                   | 115          | 4.26E-04      | 1.348248723            |
| GO:0044267~cellular protein metabolic process                | 113          | 9.19E-05      | 1.405245307            |
| GO:0048518~positive regulation of biological process         | 99           | 1.77E-04      | 1.426140875            |
| GO:0048522~positive regulation of cellular process           | 90           | 3.81E-04      | 1.427053403            |
| GO:0048519~negative regulation of biological process         | 82           | 0.005801357   | 1.325318531            |
| GO:0048523~negative regulation of cellular process           | 75           | 0.008995627   | 1.323176524            |
| GO:0006950~response to stress                                | 72           | 0.033087325   | 1.251403031            |
| GO:0006996~organelle organization                            | 71           | 1.58E-04      | 1.561056908            |
| GO:0007242~intracellular signaling cascade                   | 57           | 0.022358971   | 1.329076037            |
| GO:0043687~post-translational protein modification           | 54           | 0.023643914   | 1.337953114            |
| GO:0008219~cell death                                        | 51           | 1.21E-06      | 2.077331933            |
| GO:0016265~death                                             | 51           | 1.49E-06      | 2.062985718            |
| GO:0033036~macromolecule localization                        | 49           | 0.032408923   | 1.333670117            |
| GO:0051641~cellular localization                             | 47           | 0.006627596   | 1.483250465            |
| GO:0016070~RNA metabolic process                             | 45           | 0.019158633   | 1.404993409            |
| GO:0042981~regulation of apoptosis                           | 44           | 0.002250946   | 1.602733222            |
| GO:0043067~regulation of programmed cell death               | 44           | 0.002678309   | 1.586942747            |
| GO:0010941~regulation of cell death                          | 44           | 0.002905771   | 1.58110124             |
| GO:0031325~positive regulation of cellular metabolic process | 43           | 0.016797479   | 1.431035458            |

|                                                                       |    |             |             |
|-----------------------------------------------------------------------|----|-------------|-------------|
| GO:0008104~protein localization                                       | 43 | 0.017376476 | 1.42779048  |
| GO:0009893~positive regulation of metabolic process                   | 43 | 0.032409111 | 1.367330297 |
| GO:0007049~cell cycle                                                 | 42 | 0.003465433 | 1.585083629 |
| GO:0051649~establishment of localization in cell                      | 42 | 0.016008514 | 1.443691193 |
| GO:0012501~programmed cell death                                      | 41 | 5.87E-05    | 1.965202274 |
| GO:0006915~apoptosis                                                  | 40 | 9.04E-05    | 1.945934024 |
| GO:0009057~macromolecule catabolic process                            | 39 | 0.017024787 | 1.462440429 |
| GO:0044265~cellular macromolecule catabolic process                   | 38 | 0.009034006 | 1.535006439 |
| GO:0015031~protein transport                                          | 38 | 0.01909319  | 1.460472005 |
| GO:0045184~establishment of protein localization                      | 38 | 0.021206917 | 1.447177722 |
| GO:0042127~regulation of cell proliferation                           | 37 | 0.043581024 | 1.37686577  |
| GO:0046907~intracellular transport                                    | 36 | 0.005863484 | 1.604729154 |
| GO:0051246~regulation of protein metabolic process                    | 35 | 5.15E-04    | 1.877327375 |
| GO:0010605~negative regulation of macromolecule metabolic process     | 35 | 0.042952226 | 1.396486031 |
| GO:0006396~RNA processing                                             | 34 | 0.001076341 | 1.820355466 |
| GO:0051603~proteolysis involved in cellular protein catabolic process | 34 | 0.00454528  | 1.6595574   |
| GO:0044257~cellular protein catabolic process                         | 34 | 0.005102412 | 1.651300895 |
| GO:0030163~protein catabolic process                                  | 34 | 0.007935734 | 1.600859228 |
| GO:0019941~modification-dependent protein catabolic process           | 32 | 0.007731843 | 1.632686108 |
| GO:0043632~modification-dependent macromolecule catabolic process     | 32 | 0.007731843 | 1.632686108 |
| GO:0022402~cell cycle process                                         | 30 | 0.018796618 | 1.555025153 |
| GO:0043065~positive regulation of apoptosis                           | 29 | 8.12E-04    | 1.975123034 |
| GO:0043068~positive regulation of programmed cell death               | 29 | 9.10E-04    | 1.961438579 |
| GO:0010942~positive regulation of cell death                          | 29 | 9.82E-04    | 1.95242047  |
| GO:0032268~regulation of cellular protein metabolic process           | 29 | 0.003414836 | 1.79177828  |
| GO:0033554~cellular response to stress                                | 29 | 0.030924616 | 1.500535167 |
| GO:0016071~mRNA metabolic process                                     | 26 | 9.13E-04    | 2.057956712 |
| GO:0006397~mRNA processing                                            | 25 | 2.75E-04    | 2.280865035 |
| GO:0000278~mitotic cell cycle                                         | 25 | 0.00198551  | 1.978804531 |
| GO:0051128~regulation of cellular component organization              | 25 | 0.02463692  | 1.598597547 |
| GO:0022403~cell cycle phase                                           | 24 | 0.014968538 | 1.697756931 |

|                                                                                                 |    |             |             |
|-------------------------------------------------------------------------------------------------|----|-------------|-------------|
| GO:0008283~cell proliferation                                                                   | 24 | 0.025690403 | 1.612090297 |
| GO:0008380~RNA splicing                                                                         | 23 | 2.98E-04    | 2.371778388 |
| GO:0043066~negative regulation of apoptosis                                                     | 23 | 0.004995943 | 1.902782662 |
| GO:0043069~negative regulation of programmed cell death                                         | 23 | 0.005812809 | 1.87628151  |
| GO:0060548~negative regulation of cell death                                                    | 23 | 0.006090459 | 1.871069617 |
| GO:0007243~protein kinase cascade                                                               | 21 | 0.028709615 | 1.662195806 |
| GO:0006917~induction of apoptosis                                                               | 19 | 0.026168464 | 1.738874481 |
| GO:0012502~induction of programmed cell death                                                   | 19 | 0.027214012 | 1.733457427 |
| GO:0000279~M phase                                                                              | 19 | 0.033125271 | 1.691306486 |
| GO:0044419~interspecies interaction between organisms                                           | 18 | 0.01720956  | 1.862733311 |
| GO:0031399~regulation of protein modification process                                           | 18 | 0.024629861 | 1.786961108 |
| GO:0010608~posttranscriptional regulation of gene expression                                    | 17 | 0.002389789 | 2.359560284 |
| GO:0002520~immune system development                                                            | 17 | 0.027336969 | 1.803866739 |
| GO:0051301~cell division                                                                        | 17 | 0.045796846 | 1.687685491 |
| GO:0048285~organelle fission                                                                    | 16 | 0.011981384 | 2.04620486  |
| GO:0006511~ubiquitin-dependent protein catabolic process                                        | 16 | 0.018921815 | 1.936284764 |
| GO:0010627~regulation of protein kinase cascade                                                 | 16 | 0.02375317  | 1.881851056 |
| GO:0048534~hemopoietic or lymphoid organ development                                            | 16 | 0.033108102 | 1.80223428  |
| GO:0080134~regulation of response to stress                                                     | 16 | 0.048419471 | 1.710149317 |
| GO:0007067~mitosis                                                                              | 15 | 0.018694996 | 1.996793663 |
| GO:0000280~nuclear division                                                                     | 15 | 0.018694996 | 1.996793663 |
| GO:0000087~M phase of mitotic cell cycle                                                        | 15 | 0.021450152 | 1.961136633 |
| GO:0000398~nuclear mRNA splicing, via spliceosome                                               | 14 | 0.002222452 | 2.679792802 |
| GO:0000377~RNA splicing, via transesterification reactions with bulged adenosine as nucleophile | 14 | 0.002222452 | 2.679792802 |
| GO:0000375~RNA splicing, via transesterification reactions                                      | 14 | 0.002222452 | 2.679792802 |
| GO:0010035~response to inorganic substance                                                      | 14 | 0.023503298 | 2.000040482 |
| GO:0033043~regulation of organelle organization                                                 | 14 | 0.034963921 | 1.889439165 |
| GO:0010740~positive regulation of protein kinase cascade                                        | 13 | 0.011949331 | 2.279772405 |
| GO:0051248~negative regulation of protein metabolic process                                     | 13 | 0.026591009 | 2.03594648  |
| GO:0044087~regulation of cellular component biogenesis                                          | 12 | 0.009309886 | 2.474899188 |
| GO:0018193~peptidyl-amino acid modification                                                     | 12 | 0.022914376 | 2.169356078 |

|                                                                         |    |             |             |
|-------------------------------------------------------------------------|----|-------------|-------------|
| GO:0006979~response to oxidative stress                                 | 12 | 0.024814323 | 2.142900516 |
| GO:0006457~protein folding                                              | 12 | 0.040034652 | 1.985512343 |
| GO:0032269~negative regulation of cellular protein metabolic process    | 12 | 0.044306334 | 1.95242047  |
| GO:0051130~positive regulation of cellular component organization       | 12 | 0.045797201 | 1.941633617 |
| GO:0009101~glycoprotein biosynthetic process                            | 11 | 0.044035898 | 2.038920111 |
| GO:0070647~protein modification by small protein conjugation or removal | 11 | 0.047264982 | 2.01343361  |
| GO:0043523~regulation of neuron apoptosis                               | 10 | 0.003520201 | 3.254034117 |
| GO:0010038~response to metal ion                                        | 10 | 0.032311256 | 2.270256361 |
| GO:0030155~regulation of cell adhesion                                  | 10 | 0.044730063 | 2.137686646 |
| GO:0007005~mitochondrion organization                                   | 10 | 0.04647877  | 2.122196163 |
| GO:0051640~organelle localization                                       | 9  | 0.013115858 | 2.86496482  |
| GO:0045937~positive regulation of phosphate metabolic process           | 9  | 0.020771924 | 2.635767635 |
| GO:0010562~positive regulation of phosphorus metabolic process          | 9  | 0.020771924 | 2.635767635 |
| GO:0043122~regulation of I-kappaB kinase/NF-kappaB cascade              | 9  | 0.029700616 | 2.463334238 |
| GO:0009791~post-embryonic development                                   | 8  | 0.011993542 | 3.209458307 |
| GO:0007059~chromosome segregation                                       | 8  | 0.020337977 | 2.892474771 |
| GO:0060191~regulation of lipase activity                                | 8  | 0.02878751  | 2.692993752 |
| GO:0043123~positive regulation of I-kappaB kinase/NF-kappaB cascade     | 8  | 0.047622255 | 2.41536553  |
| GO:0042327~positive regulation of phosphorylation                       | 8  | 0.047622255 | 2.41536553  |
| GO:0043524~negative regulation of neuron apoptosis                      | 7  | 0.00745701  | 4.019689203 |
| GO:0051592~response to calcium ion                                      | 7  | 0.010715017 | 3.727348171 |
| GO:0051656~establishment of organelle localization                      | 7  | 0.029862946 | 2.971074629 |
| GO:0031349~positive regulation of defense response                      | 7  | 0.037918032 | 2.808276019 |
| GO:0000302~response to reactive oxygen species                          | 7  | 0.04241817  | 2.733388658 |
| GO:0031647~regulation of protein stability                              | 6  | 0.013549339 | 4.183758151 |
| GO:0006944~membrane fusion                                              | 6  | 0.033795482 | 3.315430987 |
| GO:0042542~response to hydrogen peroxide                                | 6  | 0.041454286 | 3.137818613 |
| GO:0016197~endosome transport                                           | 6  | 0.047097032 | 3.029617971 |
| GO:0000186~activation of MAPKK activity                                 | 5  | 0.009538241 | 5.857261411 |
| GO:0002831~regulation of response to biotic stimulus                    | 5  | 0.016095999 | 5.049363285 |
| GO:0006984~ER-nuclear signaling pathway                                 | 5  | 0.030268257 | 4.183758151 |

|                                                                 |   |             |             |
|-----------------------------------------------------------------|---|-------------|-------------|
| GO:0002711~positive regulation of T cell mediated immunity      | 4 | 0.013178866 | 7.809681881 |
| GO:0002709~regulation of T cell mediated immunity               | 4 | 0.033143367 | 5.578344201 |
| GO:0048538~thymus development                                   | 4 | 0.037432742 | 5.324783101 |
| GO:0006829~zinc ion transport                                   | 4 | 0.046814116 | 4.881051176 |
| GO:0001916~positive regulation of T cell mediated cytotoxicity  | 3 | 0.021717286 | 12.55127445 |
| GO:0002839~positive regulation of immune response to tumor cell | 3 | 0.02831063  | 10.98236515 |
| GO:0002833~positive regulation of response to biotic stimulus   | 3 | 0.02831063  | 10.98236515 |
| GO:0002834~regulation of response to tumor cell                 | 3 | 0.02831063  | 10.98236515 |
| GO:0002836~positive regulation of response to tumor cell        | 3 | 0.02831063  | 10.98236515 |
| GO:0002837~regulation of immune response to tumor cell          | 3 | 0.02831063  | 10.98236515 |
| GO:0001914~regulation of T cell mediated cytotoxicity           | 3 | 0.035590042 | 9.762102351 |
| GO:0009435~NAD biosynthetic process                             | 3 | 0.035590042 | 9.762102351 |
| GO:0019359~nicotinamide nucleotide biosynthetic process         | 3 | 0.043501312 | 8.785892116 |
| GO:0001953~negative regulation of cell-matrix adhesion          | 3 | 0.043501312 | 8.785892116 |

**Supplementary Table S5** Enrichment in biological process GO-terms (all levels) of downregulated expressed genes ( $q < 0.05$  and fold change  $> 2$ ) in SIOD compared to control human skin fibroblasts.

| <b>Term</b>                                                                      | <b>Count</b> | <b>PValue</b> | <b>Fold Enrichment</b> |
|----------------------------------------------------------------------------------|--------------|---------------|------------------------|
| GO:0009987~cellular process                                                      | 494          | 4.46E-09      | 1.130839368            |
| GO:0008152~metabolic process                                                     | 353          | 0.001386663   | 1.113882546            |
| GO:0044238~primary metabolic process                                             | 333          | 6.81E-05      | 1.160661785            |
| GO:0044237~cellular metabolic process                                            | 325          | 1.72E-05      | 1.181769473            |
| GO:0043170~macromolecule metabolic process                                       | 288          | 8.74E-06      | 1.217060488            |
| GO:0044260~cellular macromolecule metabolic process                              | 271          | 1.65E-06      | 1.254163183            |
| GO:0006807~nitrogen compound metabolic process                                   | 181          | 0.014593108   | 1.156038785            |
| GO:0034641~cellular nitrogen compound metabolic process                          | 179          | 0.00724506    | 1.176908638            |
| GO:0009058~biosynthetic process                                                  | 169          | 0.021436468   | 1.151314386            |
| GO:0006139~nucleobase, nucleoside, nucleotide and nucleic acid metabolic process | 167          | 0.008790601   | 1.182075602            |
| GO:0044249~cellular biosynthetic process                                         | 165          | 0.020140687   | 1.156721644            |
| GO:0019538~protein metabolic process                                             | 155          | 6.88E-05      | 1.330062856            |
| GO:0010467~gene expression                                                       | 153          | 0.002703185   | 1.231035986            |
| GO:0009059~macromolecule biosynthetic process                                    | 143          | 0.005928128   | 1.218424357            |
| GO:0034645~cellular macromolecule biosynthetic process                           | 142          | 0.00602068    | 1.218509197            |
| GO:0044267~cellular protein metabolic process                                    | 139          | 6.72E-06      | 1.424228501            |
| GO:0016043~cellular component organization                                       | 132          | 0.001720248   | 1.275079551            |
| GO:0048518~positive regulation of biological process                             | 100          | 0.04314565    | 1.186911684            |
| GO:0048519~negative regulation of biological process                             | 99           | 0.002875626   | 1.318356257            |
| GO:0048522~positive regulation of cellular process                               | 96           | 0.013345635   | 1.254180723            |
| GO:0048523~negative regulation of cellular process                               | 92           | 0.00281572    | 1.337320564            |
| GO:0006996~organelle organization                                                | 88           | 1.04E-05      | 1.594168528            |
| GO:0051641~cellular localization                                                 | 64           | 6.48E-05      | 1.664132037            |
| GO:0016070~RNA metabolic process                                                 | 64           | 8.77E-05      | 1.646390757            |
| GO:0033036~macromolecule localization                                            | 63           | 0.004707418   | 1.412810981            |
| GO:0051649~establishment of localization in cell                                 | 59           | 1.19E-04      | 1.67096826             |
| GO:0006508~proteolysis                                                           | 59           | 0.015287291   | 1.350725766            |



|                                                                                                         |    |             |             |
|---------------------------------------------------------------------------------------------------------|----|-------------|-------------|
| GO:0007049~cell cycle                                                                                   | 56 | 6.29E-05    | 1.741334038 |
| GO:0008104~protein localization                                                                         | 56 | 0.001470351 | 1.532058065 |
| GO:0044248~cellular catabolic process                                                                   | 55 | 0.039031249 | 1.296040331 |
| GO:0046907~intracellular transport                                                                      | 54 | 2.30E-06    | 1.983280646 |
| GO:0015031~protein transport                                                                            | 51 | 8.20E-04    | 1.61499428  |
| GO:0045184~establishment of protein localization                                                        | 51 | 9.81E-04    | 1.600293421 |
| GO:0022607~cellular component assembly                                                                  | 49 | 0.03380139  | 1.332994151 |
| GO:0009892~negative regulation of metabolic process                                                     | 48 | 0.006139044 | 1.484917817 |
| GO:0009057~macromolecule catabolic process                                                              | 47 | 0.009906301 | 1.452120337 |
| GO:0022402~cell cycle process                                                                           | 46 | 1.93E-05    | 1.964559413 |
| GO:0044265~cellular macromolecule catabolic process                                                     | 46 | 0.004102933 | 1.531001474 |
| GO:0010605~negative regulation of macromolecule metabolic process                                       | 46 | 0.005301377 | 1.512228976 |
| GO:0031324~negative regulation of cellular metabolic process                                            | 45 | 0.006204503 | 1.508119658 |
| GO:0043067~regulation of programmed cell death                                                          | 45 | 0.040055776 | 1.337248958 |
| GO:0010941~regulation of cell death                                                                     | 45 | 0.04235056  | 1.332326569 |
| GO:0051603~proteolysis involved in cellular protein catabolic process                                   | 41 | 0.00198611  | 1.648877493 |
| GO:0044257~cellular protein catabolic process                                                           | 41 | 0.002190998 | 1.640674122 |
| GO:0030163~protein catabolic process                                                                    | 41 | 0.003785536 | 1.590557067 |
| GO:0019941~modification-dependent protein catabolic process                                             | 40 | 0.001617958 | 1.681527145 |
| GO:0043632~modification-dependent macromolecule catabolic process                                       | 40 | 0.001617958 | 1.681527145 |
| GO:0006396~RNA processing                                                                               | 39 | 0.001236903 | 1.720414381 |
| GO:0006412~translation                                                                                  | 38 | 3.71E-08    | 2.770201668 |
| GO:0051246~regulation of protein metabolic process                                                      | 38 | 0.002198151 | 1.679371341 |
| GO:0006259~DNA metabolic process                                                                        | 36 | 0.002058718 | 1.716752812 |
| GO:0016192~vesicle-mediated transport                                                                   | 36 | 0.014772651 | 1.508119658 |
| GO:0000278~mitotic cell cycle                                                                           | 34 | 2.84E-05    | 2.217343497 |
| GO:0022403~cell cycle phase                                                                             | 34 | 2.45E-04    | 1.981683802 |
| GO:0009890~negative regulation of biosynthetic process                                                  | 34 | 0.034713442 | 1.431792485 |
| GO:0032268~regulation of cellular protein metabolic process                                             | 33 | 0.004526851 | 1.679930758 |
| GO:0045934~negative regulation of nucleobase, nucleoside, nucleotide and nucleic acid metabolic process | 33 | 0.013118819 | 1.555248397 |
| GO:0051172~negative regulation of nitrogen compound metabolic process                                   | 33 | 0.01596552  | 1.534272022 |

|                                                                                    |    |             |             |
|------------------------------------------------------------------------------------|----|-------------|-------------|
| GO:0010558~negative regulation of macromolecule biosynthetic process               | 33 | 0.030433277 | 1.455735246 |
| GO:0031327~negative regulation of cellular biosynthetic process                    | 33 | 0.041037632 | 1.419406737 |
| GO:0051128~regulation of cellular component organization                           | 32 | 0.004946304 | 1.685932893 |
| GO:0016071~mRNA metabolic process                                                  | 31 | 3.49E-04    | 2.021695542 |
| GO:0034613~cellular protein localization                                           | 31 | 0.001922284 | 1.820017884 |
| GO:0070727~cellular macromolecule localization                                     | 31 | 0.002104962 | 1.806829349 |
| GO:0045595~regulation of cell differentiation                                      | 31 | 0.021870139 | 1.520380794 |
| GO:0010629~negative regulation of gene expression                                  | 31 | 0.029362287 | 1.484181251 |
| GO:0006397~mRNA processing                                                         | 30 | 6.83E-05    | 2.255132199 |
| GO:0008380~RNA splicing                                                            | 29 | 1.91E-05    | 2.463970146 |
| GO:0007010~cytoskeleton organization                                               | 29 | 0.014571112 | 1.604971379 |
| GO:0034621~cellular macromolecular complex subunit organization                    | 28 | 0.001893405 | 1.892542316 |
| GO:0016481~negative regulation of transcription                                    | 28 | 0.04203877  | 1.471977357 |
| GO:0006886~intracellular protein transport                                         | 27 | 0.006916062 | 1.741999177 |
| GO:0032989~cellular component morphogenesis                                        | 26 | 0.02459913  | 1.580296669 |
| GO:0000279~M phase                                                                 | 25 | 0.005188806 | 1.833580131 |
| GO:0034622~cellular macromolecular complex assembly                                | 24 | 0.006777963 | 1.821125625 |
| GO:0043069~negative regulation of programmed cell death                            | 24 | 0.025433379 | 1.613141918 |
| GO:0060548~negative regulation of cell death                                       | 24 | 0.026055164 | 1.608660969 |
| GO:0006325~chromatin organization                                                  | 24 | 0.042046722 | 1.532058065 |
| GO:0044419~interspecies interaction between organisms                              | 23 | 0.003413072 | 1.96108846  |
| GO:0007264~small GTPase mediated signal transduction                               | 23 | 0.008230071 | 1.819632899 |
| GO:0006519~cellular amino acid and derivative metabolic process                    | 23 | 0.035545322 | 1.576670552 |
| GO:0043066~negative regulation of apoptosis                                        | 23 | 0.037848088 | 1.567762808 |
| GO:0000902~cell morphogenesis                                                      | 23 | 0.039923928 | 1.558955152 |
| GO:0006511~ubiquitin-dependent protein catabolic process                           | 22 | 0.001119248 | 2.193628594 |
| GO:0032535~regulation of cellular component size                                   | 22 | 0.004380449 | 1.95888605  |
| GO:0001501~skeletal system development                                             | 22 | 0.024485677 | 1.664132037 |
| GO:0006414~translational elongation                                                | 21 | 4.54E-09    | 5.017110942 |
| GO:0000398~nuclear mRNA splicing, via spliceosome                                  | 21 | 5.04E-06    | 3.311949053 |
| GO:0000377~RNA splicing, via transesterification reactions with bulged adenosine a | 21 | 5.04E-06    | 3.311949053 |

|                                                                      |    |             |             |
|----------------------------------------------------------------------|----|-------------|-------------|
| GO:0000375~RNA splicing, via transesterification reactions           | 21 | 5.04E-06    | 3.311949053 |
| GO:0000087~M phase of mitotic cell cycle                             | 20 | 0.00245136  | 2.154456654 |
| GO:0044106~cellular amine metabolic process                          | 20 | 0.049954855 | 1.582289477 |
| GO:0006605~protein targeting                                         | 19 | 0.003619753 | 2.132411051 |
| GO:0007067~mitosis                                                   | 19 | 0.004602839 | 2.083947164 |
| GO:0000280~nuclear division                                          | 19 | 0.004602839 | 2.083947164 |
| GO:0048285~organelle fission                                         | 19 | 0.006936248 | 2.00204531  |
| GO:0051169~nuclear transport                                         | 18 | 2.93E-04    | 2.748977605 |
| GO:0030036~actin cytoskeleton organization                           | 18 | 0.012866985 | 1.9218516   |
| GO:0030029~actin filament-based process                              | 18 | 0.022611851 | 1.80223428  |
| GO:0006913~nucleocytoplasmic transport                               | 17 | 7.44E-04    | 2.629541968 |
| GO:0006260~DNA replication                                           | 17 | 0.005577274 | 2.158992353 |
| GO:0006916~anti-apoptosis                                            | 17 | 0.011730717 | 1.991303626 |
| GO:0010608~posttranscriptional regulation of gene expression         | 17 | 0.014481678 | 1.944116337 |
| GO:0000904~cell morphogenesis involved in differentiation            | 17 | 0.04681793  | 1.68118257  |
| GO:0051130~positive regulation of cellular component organization    | 16 | 0.008244027 | 2.133031119 |
| GO:0009968~negative regulation of signal transduction                | 16 | 0.041107244 | 1.746962138 |
| GO:0006520~cellular amino acid metabolic process                     | 16 | 0.048692909 | 1.708312533 |
| GO:0044087~regulation of cellular component biogenesis               | 14 | 0.006020286 | 2.379005658 |
| GO:0032269~negative regulation of cellular protein metabolic process | 14 | 0.036411103 | 1.87677113  |
| GO:0051248~negative regulation of protein metabolic process          | 14 | 0.047054499 | 1.806517665 |
| GO:0060348~bone development                                          | 13 | 0.004942309 | 2.55031617  |
| GO:0048193~Golgi vesicle transport                                   | 13 | 0.008105847 | 2.394571671 |
| GO:0006417~regulation of translation                                 | 13 | 0.011379132 | 2.289699919 |
| GO:0051329~interphase of mitotic cell cycle                          | 12 | 0.003513838 | 2.811252178 |
| GO:0051325~interphase                                                | 12 | 0.004384042 | 2.731688437 |
| GO:0001503~ossification                                              | 12 | 0.008055309 | 2.517904125 |
| GO:0006333~chromatin assembly or disassembly                         | 12 | 0.01621979  | 2.279991924 |
| GO:0051493~regulation of cytoskeleton organization                   | 12 | 0.025568552 | 2.129110106 |
| GO:0043254~regulation of protein complex assembly                    | 11 | 0.003970442 | 2.949211776 |
| GO:0031400~negative regulation of protein modification process       | 11 | 0.025700206 | 2.230496301 |

|                                                                                   |    |             |             |
|-----------------------------------------------------------------------------------|----|-------------|-------------|
| GO:0042692~muscle cell differentiation                                            | 11 | 0.028433831 | 2.193628594 |
| GO:0031398~positive regulation of protein ubiquitination                          | 10 | 0.007776489 | 2.872608873 |
| GO:0031396~regulation of protein ubiquitination                                   | 10 | 0.022583441 | 2.412991453 |
| GO:0007498~mesoderm development                                                   | 9  | 0.011191389 | 2.934719335 |
| GO:0051028~mRNA transport                                                         | 9  | 0.027340759 | 2.496198055 |
| GO:0032956~regulation of actin cytoskeleton organization                          | 9  | 0.030790635 | 2.440103717 |
| GO:0065004~protein-DNA complex assembly                                           | 9  | 0.034527709 | 2.386475063 |
| GO:0032970~regulation of actin filament-based process                             | 9  | 0.036506704 | 2.360535117 |
| GO:0009894~regulation of catabolic process                                        | 9  | 0.045181887 | 2.262179487 |
| GO:0051348~negative regulation of transferase activity                            | 9  | 0.045181887 | 2.262179487 |
| GO:0050658~RNA transport                                                          | 9  | 0.047544783 | 2.238858049 |
| GO:0051236~establishment of RNA localization                                      | 9  | 0.047544783 | 2.238858049 |
| GO:0050657~nucleic acid transport                                                 | 9  | 0.047544783 | 2.238858049 |
| GO:0051168~nuclear export                                                         | 8  | 0.01156751  | 3.217321937 |
| GO:0009116~nucleoside metabolic process                                           | 8  | 0.01616677  | 3.016239316 |
| GO:0009896~positive regulation of catabolic process                               | 7  | 0.01508882  | 3.447130647 |
| GO:0000082~G1/S transition of mitotic cell cycle                                  | 7  | 0.027544912 | 3.016239316 |
| GO:0030832~regulation of actin filament length                                    | 7  | 0.045400815 | 2.681101614 |
| GO:0018209~peptidyl-serine modification                                           | 6  | 0.021467463 | 3.712294543 |
| GO:0006888~ER to Golgi vesicle-mediated transport                                 | 6  | 0.028689536 | 3.447130647 |
| GO:0030111~regulation of Wnt receptor signaling pathway                           | 6  | 0.040465698 | 3.147380156 |
| GO:0009156~ribonucleoside monophosphate biosynthetic process                      | 5  | 0.013722009 | 5.245633593 |
| GO:0009161~ribonucleoside monophosphate metabolic process                         | 5  | 0.018370462 | 4.825982906 |
| GO:0045732~positive regulation of protein catabolic process                       | 5  | 0.023889125 | 4.468502691 |
| GO:0000245~spliceosome assembly                                                   | 5  | 0.041676657 | 3.770299145 |
| GO:0006406~mRNA export from nucleus                                               | 5  | 0.045931594 | 3.656047656 |
| GO:0046112~nucleobase biosynthetic process                                        | 4  | 0.018232464 | 6.894261294 |
| GO:0060070~Wnt receptor signaling pathway through beta-catenin                    | 4  | 0.03107872  | 5.677626948 |
| GO:0006611~protein export from nucleus                                            | 4  | 0.036177914 | 5.362203229 |
| GO:0006541~glutamine metabolic process                                            | 4  | 0.041678094 | 5.079982006 |
| GO:0060260~regulation of transcription initiation from RNA polymerase II promoter | 3  | 0.031246927 | 10.34139194 |

|                                                  |   |             |             |
|--------------------------------------------------|---|-------------|-------------|
| GO:0006563~L-serine metabolic process            | 3 | 0.040537411 | 9.048717949 |
| GO:0008535~respiratory chain complex IV assembly | 3 | 0.040537411 | 9.048717949 |

**Supplementary Table S6** qRT-PCR measurement of mRNA levels of stress response genes in skin fibroblasts of three SIOD patients (SD31, SD120, and SD123) compared to control fibroblasts after 1 hour incubation at 43°C followed by 1 hour of recovery at 37°C.

| Gene           | SD31                     |          | SD120                    |          | SD123                    |          |
|----------------|--------------------------|----------|--------------------------|----------|--------------------------|----------|
|                | Fold Change <sup>1</sup> | p-value  | Fold Change <sup>1</sup> | p-value  | Fold Change <sup>1</sup> | p-value  |
| <i>ATF6</i>    | 1.2622                   | 0.135459 | 1.1527                   | 0.341137 | 1.1267                   | 0.229573 |
| <i>BAG1</i>    | 2.8363                   | 0.000352 | 1.0019                   | 0.966192 | 3.5748                   | 0.001308 |
| <i>BAG2</i>    | 2.6069                   | 0.015457 | 1.3677                   | 0.076477 | 1.7561                   | 0.005454 |
| <i>BAG3</i>    | 2.3752                   | 0.005095 | 1.1335                   | 0.246809 | 2.1359                   | 0.000965 |
| <i>BAG4</i>    | 1.7519                   | 0.007574 | -1.6417                  | 0.015668 | -1.4703                  | 0.04208  |
| <i>BAG5</i>    | 1.6503                   | 0.000079 | -1.3089                  | 0.007806 | 1.0188                   | 0.713173 |
| <i>CABC1</i>   | 4.4718                   | 0.00748  | -1.1867                  | 0.322074 | 3.1199                   | 0.002126 |
| <i>CCS</i>     | 1.6052                   | 0.091673 | 1.5811                   | 0.033582 | 1.6779                   | 0.00864  |
| <i>CCT2</i>    | 1.0555                   | 0.71912  | 1.2794                   | 0.07323  | 1.0454                   | 0.731147 |
| <i>CCT3</i>    | 1.1803                   | 0.371998 | 1.2696                   | 0.041069 | -1.0921                  | 0.802387 |
| <i>CCT4</i>    | 1.2538                   | 0.291481 | 1.0296                   | 0.782612 | -1.1474                  | 0.155044 |
| <i>CCT5</i>    | 1.703                    | 0.044326 | 1.5918                   | 0.021589 | 2.2955                   | 0.000936 |
| <i>CCT6A</i>   | -1.2678                  | 0.182014 | 1.3918                   | 0.019737 | -1.226                   | 0.117257 |
| <i>CCT6B</i>   | 2.4445                   | 0.008641 | 2.232                    | 0.003443 | 2.6615                   | 0.000856 |
| <i>CCT7</i>    | 1.121                    | 0.318941 | 1.1537                   | 0.159775 | 1.0567                   | 0.589396 |
| <i>CRYAA</i>   | 2.0308                   | 0.031656 | -1.6865                  | 0.013274 | 1.1369                   | 0.397599 |
| <i>CRYAB</i>   | 2.7728                   | 0.000798 | 1.1662                   | 0.170989 | 2.3195                   | 0.000731 |
| <i>DNAJAI</i>  | 1.8902                   | 0.004721 | -1.0411                  | 0.59516  | 1.4992                   | 0.003205 |
| <i>DNAJA2</i>  | 1.8288                   | 0.015735 | -1.0806                  | 0.533833 | 1.1494                   | 0.133854 |
| <i>DNAJA3</i>  | 1.5186                   | 0.086909 | -1.3755                  | 0.062798 | -1.1313                  | 0.21911  |
| <i>DNAJA4</i>  | 1.6543                   | 0.04226  | 1.1148                   | 0.410201 | 4.9672                   | 0.000418 |
| <i>DNAJC21</i> | 1.6838                   | 0.004414 | -1.3175                  | 0.01605  | 1.8026                   | 0.00075  |
| <i>DNAJB1</i>  | 3.0693                   | 0.003061 | -1.3566                  | 0.048129 | 2.3388                   | 0.000324 |
| <i>DNAJB11</i> | 1.256                    | 0.391398 | 1.556                    | 0.019928 | 2.1741                   | 0.002693 |
| <i>DNAJB12</i> | 1.5516                   | 0.062903 | -1.1573                  | 0.2057   | -1.0132                  | 0.837028 |
| <i>DNAJB13</i> | 4.908                    | 0.011193 | 2.574                    | 0.008645 | 1.3815                   | 0.192883 |
| <i>DNAJB14</i> | 2.4886                   | 0.009531 | -1.216                   | 0.160202 | 1.3437                   | 0.031363 |
| <i>DNAJB2</i>  | 1.8237                   | 0.053194 | 1.7778                   | 0.017276 | 1.8953                   | 0.006963 |
| <i>DNAJB5</i>  | 1.5158                   | 0.023366 | -1.5119                  | 0.00172  | 1.1922                   | 0.007919 |
| <i>DNAJB6</i>  | 2.309                    | 0.013448 | -1.2422                  | 0.128193 | 1.5142                   | 0.011459 |
| <i>DNAJB7</i>  | -1.8478                  | 0.122297 | -2.4916                  | 0.034937 | -11.5765                 | 0.00032  |
| <i>DNAJB8</i>  | 2.0308                   | 0.031656 | -1.6865                  | 0.013274 | 1.1369                   | 0.397599 |
| <i>DNAJB9</i>  | 1.6876                   | 0.047743 | 1.1626                   | 0.134903 | 1.428                    | 0.214447 |
| <i>DNAJC1</i>  | 1.24                     | 0.240858 | 1.066                    | 0.507613 | 1.5821                   | 0.002946 |
| <i>DNAJC10</i> | 2.0484                   | 0.013372 | 1.2707                   | 0.097916 | 1.373                    | 0.027786 |
| <i>DNAJC11</i> | 1.3614                   | 0.148716 | -1.3231                  | 0.129836 | -1.0958                  | 0.414228 |
| <i>DNAJC12</i> | 4.0663                   | 0.00048  | 4.9156                   | 0.002463 | 5.1697                   | 0.000236 |
| <i>DNAJC13</i> | 2.8202                   | 0.00894  | -1.0573                  | 0.651368 | 1.8742                   | 0.001514 |
| <i>DNAJC14</i> | 1.6656                   | 0.037315 | -1.3898                  | 0.060453 | -1.0039                  | 0.941755 |
| <i>DNAJC15</i> | 1.0088                   | 0.875137 | -1.2968                  | 0.048745 | 1.834                    | 0.001982 |
| <i>DNAJC16</i> | 2.0805                   | 0.007253 | -1.5147                  | 0.00464  | -1.1601                  | 0.244467 |
| <i>DNAJC17</i> | -1.1704                  | 0.550877 | -1.0757                  | 0.647931 | 1.0509                   | 0.727862 |

| Gene            | SD31                     |          | SD120                    |          | SD123                    |          |
|-----------------|--------------------------|----------|--------------------------|----------|--------------------------|----------|
|                 | Fold Change <sup>1</sup> | p-value  | Fold Change <sup>1</sup> | p-value  | Fold Change <sup>1</sup> | p-value  |
| <i>DNAJC18</i>  | 2.3974                   | 0.000544 | 1.0137                   | 0.761849 | 1.2689                   | 0.05454  |
| <i>DNAJC19</i>  | 2.0104                   | 0.02115  | -1.0308                  | 0.732268 | 1.3744                   | 0.042366 |
| <i>DNAJC3</i>   | 1.6272                   | 0.0203   | -1.0526                  | 0.483296 | 1.1837                   | 0.045033 |
| <i>DNAJC4</i>   | 2.1059                   | 0.007588 | 1.213                    | 0.134052 | 1.672                    | 0.002261 |
| <i>DNAJC5</i>   | 1.4992                   | 0.089455 | -1.0945                  | 0.556829 | 1.0841                   | 0.581058 |
| <i>DNAJC5B</i>  | -1.7485                  | 0.05082  | -13.9052                 | 0.001171 | -6.931                   | 0.002672 |
| <i>DNAJC5G</i>  | 2.7951                   | 0.074388 | -2.2499                  | 0.04763  | 2.627                    | 0.08139  |
| <i>DNAJC6</i>   | 4.3437                   | 0.002866 | -4.2096                  | 0.00158  | 5.0898                   | 0.000102 |
| <i>DNAJC7</i>   | 1.4678                   | 0.079094 | -1.2378                  | 0.105793 | 1.0816                   | 0.430962 |
| <i>DNAJC8</i>   | 2.9316                   | 0.082972 | 1.1456                   | 0.606909 | 1.2251                   | 0.402511 |
| <i>DNAJC9</i>   | -1.2187                  | 0.059206 | -1.297                   | 0.002987 | -1.6626                  | 0.000321 |
| <i>HSF1</i>     | 1.7037                   | 0.001014 | 1.2039                   | 0.012965 | 1.693                    | 0.000554 |
| <i>HSF2</i>     | 3.7187                   | 0.000054 | 1.1685                   | 0.245527 | 2.6181                   | 0.000216 |
| <i>HSF4</i>     | 3.0363                   | 0.000718 | 1.3445                   | 0.035484 | -1.1376                  | 0.042188 |
| <i>HSP90AA1</i> | 2.938                    | 0.00552  | 1.0408                   | 0.692262 | 3.2181                   | 0.000208 |
| <i>HSP90AB1</i> | 2.1555                   | 0.002423 | 1.0505                   | 0.454187 | 1.8069                   | 0.000318 |
| <i>HSP90B1</i>  | 1.3814                   | 0.011546 | 1.1989                   | 0.025172 | 1.4283                   | 0.000416 |
| <i>HSPA14</i>   | 1.1383                   | 0.063373 | -1.0317                  | 0.782365 | 1.1064                   | 0.333144 |
| <i>HSPA1A</i>   | 2.5847                   | 0.046463 | -1.2247                  | 0.344951 | 2.1791                   | 0.007469 |
| <i>HSPA1B</i>   | 2.9215                   | 0.005535 | -1.4627                  | 0.002436 | 1.7568                   | 0.00079  |
| <i>HSPAIL</i>   | 5.5563                   | 0.000001 | -1.2233                  | 0.036845 | 3.9498                   | 0.00004  |
| <i>HSPA2</i>    | 2.8723                   | 0.007686 | -1.1206                  | 0.283253 | 4.2841                   | 0.000186 |
| <i>HSPA4</i>    | 2.2979                   | 0.002071 | 1.0027                   | 0.932654 | 1.6326                   | 0.007511 |
| <i>HSPA4L</i>   | 3.8847                   | 0.016677 | -1.1327                  | 0.339189 | 1.761                    | 0.002674 |
| <i>HSPA5</i>    | 3.8825                   | 0.00498  | 1.6645                   | 0.002534 | 7.3608                   | 0.00008  |
| <i>HSPA8</i>    | 1.5769                   | 0.002565 | -1.2295                  | 0.00289  | 1.1998                   | 0.01201  |
| <i>HSPA9</i>    | 1.197                    | 0.234855 | 1.0549                   | 0.51817  | -1.3069                  | 0.023021 |
| <i>HSPB1</i>    | 1.4327                   | 0.141766 | 1.0467                   | 0.748537 | 1.4403                   | 0.023439 |
| <i>HSPB2</i>    | 2.071                    | 0.017525 | -1.1902                  | 0.111889 | 1.5279                   | 0.002922 |
| <i>HSPB3</i>    | 2.8403                   | 0.014347 | -1.5145                  | 0.018669 | 3.3656                   | 0.000012 |
| <i>HSPB6</i>    | -1.0588                  | 0.751031 | -1.1489                  | 0.165979 | -1.1973                  | 0.092469 |
| <i>HSPB7</i>    | 14.0196                  | 0.000908 | -1.3056                  | 0.047857 | 3.3633                   | 0.000037 |
| <i>HSPB8</i>    | -1.2165                  | 0.248509 | -1.0672                  | 0.531006 | -2.5981                  | 0.00206  |
| <i>HSPD1</i>    | 3.1641                   | 0.002914 | -1.2302                  | 0.118704 | 1.6812                   | 0.006083 |
| <i>HSPE1</i>    | 2.0426                   | 0.000039 | 1.0677                   | 0.301475 | 1.6065                   | 0.000192 |
| <i>HSPH1</i>    | 4.2396                   | 0.001114 | 1.0436                   | 0.598721 | 4.093                    | 0.000038 |
| <i>PFDN1</i>    | 2.8813                   | 0.001943 | -1.2699                  | 0.384879 | 1.2868                   | 0.385838 |
| <i>PFDN2</i>    | 1.2087                   | 0.320503 | 1.2494                   | 0.075045 | 1.3943                   | 0.01892  |
| <i>SERPINH1</i> | 1.0267                   | 0.771942 | 1.4885                   | 0.003026 | 1.0247                   | 0.744577 |
| <i>SIL1</i>     | 1.2471                   | 0.001528 | 1.1006                   | 0.053786 | 1.1353                   | 0.206732 |
| <i>TCPI1</i>    | 1.7705                   | 0.214631 | -1.1336                  | 0.604575 | 1.0429                   | 0.994102 |
| <i>TOR1A</i>    | 2.0642                   | 0.016952 | 1.1888                   | 0.229031 | 1.7942                   | 0.008074 |

Key: <sup>1</sup> Fold change of SMARCA1-deficient fibroblast relative to control fibroblasts.

**Supplementary Table S7** Log<sub>2</sub> scale value of mRNA expression in *yw*, *Marca1<sup>del/del</sup>*, *RpII215<sup>4</sup>/FM7*, and *RpII215<sup>4</sup>/FM7;Marca1<sup>del/del</sup>* fly ovaries at 20°C and *yw* and *Marca1<sup>del/del</sup>* ovaries at 25°C.

| <i>AffyID</i> | <i>FlyBase</i>          | <i>yw</i> (20°C) | <i>Marca1<sup>del/del</sup></i> (20°C) | <i>RpII215<sup>4</sup>/FM7</i> (20°C) | <i>RpII215<sup>4</sup>/FM7;Marca1<sup>del/del</sup></i> (20°C) | <i>yw</i> (25°C) | <i>Marca1<sup>del/del</sup></i> (25°C) |
|---------------|-------------------------|------------------|----------------------------------------|---------------------------------------|----------------------------------------------------------------|------------------|----------------------------------------|
| 1638332 at    | FBgn0051926             | 7.78             | 9.94                                   | 7.63                                  | 6.62                                                           | 7.48             | 10                                     |
| 1624061_at    | FBgn0014076             | 10.66            | 12.74                                  | 11.16                                 | 10.32                                                          | 10.62            | 12.69                                  |
| 1632351 at    | FBgn0041252             | 9.17             | 11.19                                  | 9.05                                  | 7.8                                                            | 8.44             | 11.08                                  |
| 1640516 at    | FBgn0036938             | 7.71             | 9.71                                   | 8.19                                  | 7.29                                                           | 7.43             | 9.33                                   |
| 1639210 at    | FBgn0000644             | 9.05             | 10.99                                  | 9.87                                  | 8.95                                                           | 8.94             | 10.87                                  |
| 1631343 at    | FBgn0029696             | 7.78             | 9.72                                   | 8.69                                  | 6.45                                                           | 7.42             | 9.41                                   |
| 1625398 at    | FBgn0031754             | 8.18             | 10.11                                  | 9.32                                  | 8.52                                                           | 8.37             | 9.39                                   |
| 1637929 a at  | FBgn0052602             | 8.38             | 10.28                                  | 9.44                                  | 7.86                                                           | 8.14             | 10.2                                   |
| 1641113 at    | FBgn0032789             | 10.07            | 11.74                                  | 10.52                                 | 8.64                                                           | 9.57             | 11.82                                  |
| 1634091 at    | FBgn0000358             | 12.38            | 14.01                                  | 11.37                                 | 11.95                                                          | 12.31            | 13.98                                  |
| 1635548 s at  | FBgn0028536             | 7.99             | 9.59                                   | 7.34                                  | 7.52                                                           | 6.08             | 8.32                                   |
| 1637395 at    | FBgn0032788             | 9.51             | 11.1                                   | 9.71                                  | 7.86                                                           | 8.78             | 11.19                                  |
| 1632106 at    | FBgn0039754             | 7.82             | 9.31                                   | 8.86                                  | 7.73                                                           | 7.44             | 9.05                                   |
| 1629380 at    | FBgn0000356             | 11.78            | 13.26                                  | 10.63                                 | 10.52                                                          | 11.63            | 13.33                                  |
| 1631556 at    | FBgn0000357             | 12.15            | 13.61                                  | 10.66                                 | 10.24                                                          | 11.71            | 13.8                                   |
| 1625897 s at  | ---                     | 7.45             | 8.9                                    | 8.17                                  | 6.69                                                           | 6.69             | 8.92                                   |
| 1634351 at    | FBgn0030653             | 7.31             | 8.74                                   | 7.25                                  | 7.67                                                           | 7.14             | 8.35                                   |
| 1630377 at    | FBgn0051928             | 8.43             | 9.81                                   | 8.45                                  | 7.88                                                           | 8.28             | 10.25                                  |
| 1633465 at    | FBgn0030043             | 10.52            | 11.88                                  | 10.9                                  | 8.76                                                           | 9.16             | 11.4                                   |
| 1623852 at    | FBgn0038395             | 9.75             | 11.1                                   | 10.17                                 | 9.51                                                           | 9.18             | 11.21                                  |
| 1637407 at    | ---                     | 8.24             | 9.57                                   | 9.43                                  | 8.08                                                           | 9.06             | 9.76                                   |
| 1639805 at    | ---                     | 8.45             | 9.75                                   | 9.11                                  | 8.14                                                           | 8.07             | 9.8                                    |
| 1636357 at    | FBgn0035768             | 9.86             | 11.13                                  | 10.07                                 | 8.85                                                           | 8.72             | 11.19                                  |
| 1633471 at    | FBgn0033521 /// FBgn003 | 7.4              | 8.66                                   | 7.71                                  | 5.18                                                           | 7.17             | 8.06                                   |
| 1624660 at    | ---                     | 7.05             | 8.27                                   | 7.81                                  | 7.78                                                           | 6.99             | 7.99                                   |
| 1626846 s at  | FBgn0031914             | 7.66             | 8.86                                   | 8.44                                  | 7.41                                                           | 6.89             | 8.62                                   |
| 1629407 at    | FBgn0032126             | 8.27             | 9.45                                   | 9.04                                  | 7.4                                                            | 6.59             | 8.92                                   |
| 1628474 at    | ---                     | 8.52             | 9.69                                   | 8.34                                  | 7.69                                                           | 7.74             | 8.27                                   |
| 1623883 at    | ---                     | 6.99             | 8.12                                   | 7.27                                  | 7.62                                                           | 7.16             | 7.9                                    |
| 1627195 at    | FBgn0052642             | 7.29             | 8.42                                   | 6.7                                   | 5.78                                                           | 6.47             | 8.61                                   |
| 1633305 at    | FBgn0039678             | 7.44             | 8.52                                   | 7.68                                  | 7.68                                                           | 7.56             | 8.08                                   |



|              |                         |       |       |       |       |       |       |
|--------------|-------------------------|-------|-------|-------|-------|-------|-------|
| 1637806 at   | FBgn0037661             | 6.47  | 7.55  | 7.16  | 6.78  | 7.12  | 7.82  |
| 1632979 at   | FBgn0033381             | 8.96  | 10.04 | 10.04 | 9.94  | 8.97  | 9.93  |
| 1626467 a at | FBgn0031111             | 8.96  | 10.04 | 9.42  | 8.14  | 7.77  | 9.96  |
| 1627844 at   | FBgn0014469             | 9.41  | 10.48 | 10.35 | 10.31 | 9.44  | 10.28 |
| 1639036 at   | FBgn0033699             | 8.62  | 9.69  | 9.67  | 8.63  | 8.67  | 9.79  |
| 1632984 s at | ---                     | 7.18  | 8.23  | 7.45  | 6.76  | 7.11  | 7.95  |
| 1637707 at   | FBgn0038469             | 8.99  | 10.05 | 9.3   | 7.75  | 7.27  | 10.12 |
| 1637261 at   | FBgn0030045             | 10.42 | 11.47 | 10.13 | 9.45  | 8.86  | 11.51 |
| 1626856 at   | FBgn0031974             | 6.95  | 7.98  | 8.05  | 7.83  | 7.89  | 8.35  |
| 1629229 a at | FBgn0003507             | 8.47  | 9.49  | 8.91  | 7.53  | 7.28  | 9.28  |
| 1629673 at   | FBgn0031554             | 7.19  | 8.21  | 7.22  | 5.44  | 5.76  | 7.97  |
| 1641158 a at | FBgn0000427             | 11.03 | 12.03 | 11.15 | 10.42 | 10.53 | 12.1  |
| 1627352 at   | ---                     | 8.27  | 9.27  | 9.94  | 9.03  | 7.95  | 9.01  |
| 1635576 at   | ---                     | 9.63  | 10.61 | 9.77  | 8.79  | 9.29  | 9.83  |
| 1627880 at   | FBgn0050334             | 7.21  | 8.17  | 6.14  | 5.83  | 7.43  | 7.45  |
| 1637843 at   | FBgn0016724             | 8.84  | 9.8   | 7.84  | 8.07  | 8.27  | 8.68  |
| 1624810 at   | FBgn0052774             | 8.49  | 9.45  | 8.74  | 6.8   | 6.4   | 9.73  |
| 1623681 at   | FBgn0035697             | 8.32  | 9.27  | 8.61  | 6.33  | 6.17  | 9.28  |
| 1635060 at   | FBgn0040733             | 7.71  | 8.64  | 7.59  | 7.34  | 7.44  | 8.28  |
| 1625651 at   | FBgn0031359             | 6.75  | 7.67  | 7.16  | 7.68  | 7.19  | 7.91  |
| 1630842 s at | FBgn0052641             | 8.83  | 9.75  | 8.97  | 8.99  | 8.89  | 9.68  |
| 1635503 at   | FBgn0003983             | 13.24 | 14.13 | 13.42 | 13.2  | 13.22 | 14.15 |
| 1637835 at   | FBgn0030510             | 8.13  | 9.02  | 8.16  | 8.28  | 8.39  | 8.89  |
| 1631628 s at | FBgn0033521 /// FBgn003 | 8.14  | 9.03  | 8.67  | 8.5   | 8.26  | 8.42  |
| 1630441 at   | FBgn0030439             | 8.06  | 8.95  | 8.15  | 6     | 6.53  | 8.46  |
| 1625046 at   | FBgn0030067             | 7.82  | 8.7   | 9.23  | 9.05  | 7.71  | 9.11  |
| 1630767 at   | FBgn0051262             | 8.58  | 9.46  | 8.92  | 9.24  | 8.94  | 9.16  |
| 1629271 at   | FBgn0034494             | 9.87  | 10.74 | 9.91  | 10.91 | 9.94  | 10.75 |
| 1641398 s at | FBgn0034657             | 8.21  | 9.07  | 8.73  | 9.08  | 8.32  | 9.18  |
| 1640031 at   | FBgn0016122             | 9.22  | 10.08 | 9.64  | 9.17  | 9.06  | 9.92  |
| 1632992 at   | FBgn0029568             | 10.43 | 11.28 | 10.42 | 8.73  | 8.98  | 11.44 |
| 1637731 at   | FBgn0030042             | 9.42  | 10.27 | 9.31  | 7.74  | 8.07  | 9.9   |
| 1626286 at   | FBgn0034495             | 7.67  | 8.52  | 7.4   | 8.75  | 7.55  | 8.3   |
| 1635742 s at | FBgn0036715             | 7.9   | 8.74  | 8.26  | 7.59  | 6.73  | 8.49  |
| 1629061 s at | FBgn0001228             | 7.46  | 8.29  | 8.99  | 8.4   | 8.57  | 8.62  |
| 1627171 at   | ---                     | 9.71  | 10.54 | 9.96  | 9.83  | 9.93  | 10.54 |

|              |             |       |       |       |       |       |       |
|--------------|-------------|-------|-------|-------|-------|-------|-------|
| 1624747 at   | FBgn0024920 | 9.5   | 10.31 | 10.21 | 10.34 | 9.84  | 10.33 |
| 1634468 at   | FBgn0014417 | 9.27  | 10.07 | 9.69  | 10.11 | 9.33  | 10.14 |
| 1639035 at   | FBgn0030931 | 6.65  | 7.45  | 6.52  | 7.14  | 7.38  | 7.75  |
| 1635847 at   | FBgn0003979 | 13.12 | 13.92 | 13.52 | 12.95 | 12.91 | 14.08 |
| 1639415 at   | ---         | 7.56  | 8.35  | 7.55  | 7.17  | 7.55  | 7.41  |
| 1638233 at   | ---         | 9.2   | 9.98  | 9.6   | 9.58  | 9.1   | 9.76  |
| 1632499 at   | FBgn0025390 | 8.52  | 9.3   | 8.28  | 6.67  | 7.23  | 9.23  |
| 1631098 at   | FBgn0035868 | 6     | 6.77  | 7.15  | 6.65  | 7.07  | 7.35  |
| 1623044 at   | FBgn0000355 | 13.42 | 14.19 | 12.13 | 12.9  | 13.38 | 14.29 |
| 1625075 at   | FBgn0027570 | 7.84  | 8.61  | 7.9   | 6.87  | 7.01  | 8.41  |
| 1641211 at   | FBgn0030044 | 10.34 | 11.1  | 9.54  | 9.55  | 8.53  | 11.26 |
| 1627340 at   | FBgn0010309 | 7.89  | 8.64  | 8.25  | 7.96  | 7.65  | 8.68  |
| 1634658 a at | FBgn0033765 | 8.84  | 9.58  | 9.56  | 9.67  | 8.15  | 9.13  |
| 1625263 at   | ---         | 9.44  | 10.18 | 10.18 | 10.43 | 9.62  | 10.09 |
| 1635173 at   | FBgn0031681 | 7.33  | 8.07  | 8.23  | 7.11  | 6.61  | 8.09  |
| 1624885 at   | ---         | 7.28  | 8.01  | 7.41  | 5.98  | 6.07  | 8.17  |
| 1629569 at   | FBgn0030555 | 7.24  | 7.97  | 6.97  | 7.39  | 7.48  | 7.95  |
| 1630539 at   | FBgn0034410 | 7.76  | 8.48  | 7.77  | 8.27  | 7.7   | 8.44  |
| 1627964 s at | FBgn0036116 | 7.2   | 7.92  | 7.44  | 6.42  | 6.1   | 7.8   |
| 1626088 at   | FBgn0039902 | 7.17  | 7.88  | 7.38  | 7.77  | 7.44  | 7.88  |
| 1624067 at   | FBgn0033887 | 8.35  | 9.05  | 8.54  | 7.13  | 7.28  | 8.76  |
| 1637774 s at | FBgn0034063 | 8.28  | 8.98  | 8.18  | 8.57  | 8.17  | 8.9   |
| 1624800 at   | FBgn0034354 | 10.2  | 10.88 | 10.4  | 10.73 | 9.56  | 10.07 |
| 1634890 at   | ---         | 9.55  | 10.23 | 9.83  | 10.04 | 10.08 | 10.41 |
| 1624729 at   | FBgn0005630 | 6.77  | 7.45  | 7.45  | 7.22  | 7     | 7.51  |
| 1626442 at   | ---         | 9.48  | 10.15 | 10.18 | 9.64  | 9.7   | 10    |
| 1628759 a at | FBgn0036814 | 8.52  | 9.19  | 8.62  | 8.58  | 8.32  | 9.26  |
| 1640551 at   | FBgn0024909 | 6.6   | 7.26  | 6.91  | 7.06  | 7.73  | 7.85  |
| 1635928 a at | FBgn0000489 | 7.81  | 8.47  | 8.58  | 7.75  | 7.73  | 8.36  |
| 1628758 at   | FBgn0039856 | 6.57  | 7.23  | 7.11  | 7.9   | 7.44  | 7.59  |
| 1640112 at   | FBgn0004629 | 9.46  | 10.12 | 10    | 9.28  | 9.42  | 9.93  |
| 1623569 at   | FBgn0015351 | 6.92  | 7.55  | 7.09  | 7.33  | 7.04  | 7.25  |
| 1634584 at   | ---         | 7.71  | 8.34  | 8.15  | 8.06  | 8.05  | 8.34  |
| 1635390 s at | FBgn0032889 | 8.71  | 9.34  | 8.98  | 9.39  | 9.14  | 9.18  |
| 1635701 at   | FBgn0010039 | 8.35  | 8.98  | 9.03  | 9.18  | 9.09  | 9.6   |
| 1631231 at   | FBgn0001085 | 7.96  | 8.59  | 8.51  | 8.41  | 7.66  | 8.5   |

|              |                         |       |       |       |       |       |       |
|--------------|-------------------------|-------|-------|-------|-------|-------|-------|
| 1623364 at   | FBgn0034761             | 8.16  | 8.79  | 10.07 | 8.89  | 7.82  | 8.61  |
| 1634872 at   | FBgn0034266             | 7.42  | 8.05  | 7.53  | 8.19  | 7.1   | 7.7   |
| 1635200 at   | FBgn0036332             | 6.03  | 6.65  | 6.64  | 7.04  | 7.65  | 7.57  |
| 1628114 s at | FBgn0026379             | 7.89  | 8.51  | 8.34  | 8.55  | 8.38  | 8.81  |
| 1636174 at   | FBgn0038020             | 7.17  | 7.79  | 7.8   | 8.5   | 8.81  | 8.69  |
| 1625658 at   | FBgn0031909             | 8.55  | 9.16  | 8.94  | 9.12  | 8.98  | 9.32  |
| 1640002 at   | FBgn0029924             | 9.17  | 9.77  | 9.12  | 9.82  | 8.94  | 9.28  |
| 1641651 at   | FBgn0003980             | 12.83 | 13.43 | 12.97 | 12.33 | 12.32 | 13.56 |
| 1630593 at   | ---                     | 7.07  | 7.66  | 6.56  | 6.41  | 7.13  | 8.41  |
| AFFX-Dros-1  | ---                     | 11.36 | 11.96 | 11.63 | 12.48 | 11.78 | 12    |
| 1625524 at   | FBgn0031484             | 9.21  | 9.81  | 9.38  | 9.81  | 9.07  | 9.8   |
| 1626103 at   | FBgn0000360             | 13.57 | 14.16 | 13.53 | 12.26 | 12.51 | 14.11 |
| 1633463 s at | ---                     | 8.43  | 9.01  | 8.77  | 8     | 8.01  | 8.99  |
| 1637607 at   | FBgn0033392             | 7.56  | 8.15  | 8.03  | 8.2   | 7.66  | 8.17  |
| 1633861 at   | FBgn0037617             | 7.86  | 8.44  | 8.34  | 7.73  | 8.32  | 8.58  |
| 1636953 a at | FBgn0036672             | 7.36  | 7.94  | 8.68  | 7.31  | 7.15  | 8.07  |
| 1641206 at   | FBgn0015542             | 7.16  | 7.73  | 7.49  | 7.73  | 7.23  | 7.62  |
| 1631333 s at | FBgn0052954             | 12.28 | 12.84 | 12.72 | 12.74 | 12.56 | 12.85 |
| 1630942 at   | FBgn0034304             | 7.57  | 8.13  | 7.79  | 8.31  | 7.82  | 8.21  |
| 1629621 a at | FBgn0025382             | 8.14  | 8.71  | 7.68  | 7.85  | 6.22  | 7.4   |
| 1635125 a at | ---                     | 7.96  | 8.53  | 8.42  | 7.38  | 7.84  | 8.65  |
| 1630301 at   | FBgn0031022             | 7.32  | 7.88  | 7.96  | 7.97  | 7.55  | 8     |
| 1640243 at   | FBgn0032524             | 9.69  | 10.25 | 10.02 | 9.6   | 9.57  | 10.21 |
| 1626133 s at | ---                     | 7.17  | 7.73  | 7.1   | 7.34  | 6.79  | 7.78  |
| 1635502 at   | FBgn0034141             | 8.88  | 9.43  | 9.14  | 9.16  | 8.99  | 9.31  |
| 1630019 s at | FBgn0035289             | 8.28  | 8.83  | 8.94  | 7.42  | 7.19  | 8.73  |
| 1641489 at   | FBgn0053169             | 6.79  | 7.34  | 7.11  | 6.78  | 7.31  | 7.96  |
| 1629973 at   | FBgn0038321             | 7.78  | 8.32  | 7.98  | 7.57  | 7.34  | 7.81  |
| 1636228 at   | FBgn0000359             | 13.53 | 14.07 | 13.42 | 12.16 | 12.37 | 14.04 |
| 1634016 at   | FBgn0037534             | 7.78  | 8.31  | 8.29  | 6.99  | 6.91  | 8.12  |
| 1625162 at   | FBgn0035591             | 7.34  | 7.88  | 7.72  | 7.69  | 7.37  | 7.92  |
| 1627582 a at | FBgn0050035             | 8.3   | 8.83  | 9.02  | 8.59  | 8.04  | 8.64  |
| 1640957 at   | FBgn0041629             | 7.84  | 8.37  | 8.93  | 8.97  | 7.6   | 8.3   |
| 1628731 s at | FBgn0033374 /// FBgn003 | 10.37 | 10.9  | 10.63 | 10.9  | 10.39 | 11.02 |
| 1636137 at   | FBgn0015582             | 7.93  | 8.45  | 8.26  | 8.54  | 8.05  | 8.41  |
| 1634410 at   | FBgn0036249             | 7.73  | 8.25  | 8.22  | 8.83  | 8.18  | 8.55  |

|              |             |       |       |       |       |       |       |
|--------------|-------------|-------|-------|-------|-------|-------|-------|
| 1638845 at   | FBgn0037898 | 7.17  | 7.68  | 7.68  | 7.49  | 7.13  | 7.61  |
| 1637299 s at | FBgn0036240 | 8.43  | 8.94  | 8.93  | 9.33  | 8.82  | 9     |
| 1633182 at   | FBgn0051661 | 7.96  | 8.47  | 7.66  | 6.42  | 7.53  | 9.13  |
| 1633833 at   | FBgn0038470 | 8.16  | 8.67  | 8.8   | 9.16  | 8.79  | 8.95  |
| 1634395 at   | FBgn0035328 | 10.93 | 11.43 | 10.62 | 8.51  | 8.22  | 11.53 |
| 1623191 at   | FBgn0032782 | 8.53  | 9.03  | 8.52  | 8.67  | 8.74  | 9     |
| 1627284 at   | ---         | 7.82  | 8.32  | 7.41  | 6.31  | 6.55  | 8.31  |
| 1640101 at   | FBgn0034008 | 8.69  | 9.18  | 8.67  | 9.49  | 8.43  | 9.2   |
| 1631610 at   | FBgn0032079 | 7.72  | 8.22  | 7.98  | 7.9   | 7.95  | 8.38  |
| 1639727 at   | FBgn0027583 | 8.54  | 9.04  | 8.9   | 9.21  | 8.64  | 9.09  |
| 1630870 s at | FBgn0031878 | 8.99  | 9.48  | 9.32  | 9.64  | 9.2   | 9.44  |
| 1637151 at   | FBgn0020270 | 8.9   | 9.4   | 9.15  | 9.04  | 9     | 9.25  |
| 1633159 at   | FBgn0039650 | 7.09  | 7.57  | 7.63  | 7.86  | 7.4   | 7.7   |
| 1633135 s at | FBgn0042174 | 9.18  | 9.66  | 8.88  | 9.59  | 10.44 | 10.67 |
| 1638619 s at | ---         | 6.34  | 6.83  | 6.91  | 7.27  | 7.23  | 7.26  |
| 1639986 at   | FBgn0036478 | 9.05  | 9.54  | 9.52  | 9.25  | 9.16  | 9.63  |
| 1635427 a at | FBgn0026239 | 7.84  | 8.32  | 8.38  | 8.14  | 7.72  | 8.2   |
| 1640429 a at | FBgn0033853 | 9.14  | 9.62  | 9.43  | 9.36  | 9.35  | 9.74  |
| 1626708 at   | FBgn0020224 | 10.03 | 10.5  | 10.6  | 9.83  | 10.02 | 10.46 |
| 1626835 at   | ---         | 8.6   | 9.07  | 9.12  | 8.72  | 8.99  | 9.47  |
| 1639904 at   | ---         | 8.04  | 8.52  | 8.14  | 8.21  | 8     | 8.22  |
| 1625795 a at | FBgn0034999 | 8.38  | 8.85  | 8.69  | 9.15  | 8.56  | 8.74  |
| 1625940 s at | FBgn0004666 | 7.58  | 8.05  | 7.93  | 7.62  | 7.07  | 7.7   |
| 1635773 at   | FBgn0035704 | 7.85  | 8.33  | 8.18  | 8.36  | 8.07  | 8.33  |
| 1626414 at   | ---         | 7.11  | 7.58  | 7.64  | 7.68  | 7.28  | 7.76  |
| 1625572 s at | ---         | 7.04  | 7.51  | 7.37  | 7.19  | 6.54  | 6.61  |
| 1624583 at   | ---         | 9.75  | 10.22 | 10.51 | 10.12 | 9.8   | 10.35 |
| 1637992 at   | FBgn0039204 | 7.93  | 8.39  | 8.33  | 7.83  | 7.87  | 8.17  |
| 1622971 at   | FBgn0034380 | 8.05  | 8.51  | 8.51  | 8.79  | 8.14  | 8.55  |
| 1625344 at   | FBgn0026718 | 9.14  | 9.6   | 9.71  | 9.83  | 9.23  | 9.84  |
| 1633957 s at | FBgn0038704 | 7.86  | 8.32  | 8.37  | 8.9   | 8.22  | 8.48  |
| 1626264 at   | FBgn0031435 | 9.87  | 10.33 | 9.86  | 10.25 | 9.96  | 10.49 |
| 1630483 a at | FBgn0035793 | 7.87  | 8.33  | 7.63  | 7.74  | 8.03  | 8.37  |
| 1627820 at   | FBgn0050096 | 6.51  | 6.97  | 6.49  | 7.16  | 7.03  | 7.39  |
| 1624699 s at | FBgn0000242 | 8.83  | 9.29  | 8.78  | 9.02  | 9.05  | 9.43  |
| 1637421 at   | FBgn0022702 | 9.16  | 9.62  | 9.37  | 9.8   | 9.55  | 9.76  |

|              |                         |       |       |       |       |       |       |
|--------------|-------------------------|-------|-------|-------|-------|-------|-------|
| 1624332 s at | FBgn0027500 /// FBgn003 | 9.09  | 9.55  | 9.15  | 9.35  | 8.8   | 9.59  |
| 1624214 at   | FBgn0034599             | 8.2   | 8.66  | 8.41  | 8.63  | 8.34  | 8.66  |
| 1636296 at   | FBgn0037755             | 7.84  | 8.3   | 7.99  | 8.19  | 8.1   | 8.15  |
| 1638275 at   | FBgn0030311             | 10.1  | 10.55 | 10.28 | 10.31 | 10.24 | 10.65 |
| 1627779 at   | FBgn0035674             | 8.67  | 9.12  | 8.57  | 9.01  | 8.2   | 8.69  |
| 1641320 s at | FBgn0029896             | 7.72  | 8.17  | 8.27  | 7.02  | 6.75  | 8.17  |
| 1635061 at   | ---                     | 12.95 | 13.4  | 13.25 | 12.85 | 13.01 | 13.53 |
| 1631617 at   | ---                     | 7.84  | 8.29  | 7.97  | 7.77  | 8.02  | 8.24  |
| 1637826 at   | FBgn0032727             | 9.52  | 9.97  | 10.3  | 9.41  | 9.11  | 9.84  |
| 1623698 s at | FBgn0015247             | 9.67  | 10.11 | 10.01 | 10.27 | 9.98  | 10.05 |
| 1640845 at   | FBgn0037046             | 7.23  | 7.67  | 7.41  | 6.86  | 4.31  | 4.66  |
| 1632361 at   | FBgn0031814             | 7.86  | 8.3   | 7.72  | 8.05  | 7.67  | 8.3   |
| 1624387 at   | FBgn0050372             | 7.79  | 8.24  | 7.97  | 8.11  | 7.72  | 8.25  |
| 1623411 at   | FBgn0005630             | 7.02  | 7.46  | 7.18  | 7.67  | 7.7   | 7.71  |
| 1628322 at   | FBgn0015926             | 9.56  | 10.01 | 9.37  | 9.88  | 9.63  | 9.79  |
| 1627323 at   | FBgn0034062             | 7.54  | 7.98  | 7.87  | 7.85  | 7.8   | 8.09  |
| 1632949 at   | ---                     | 8.43  | 8.87  | 8.54  | 9.18  | 8.69  | 8.89  |
| 1626051 at   | ---                     | 7.81  | 8.25  | 8.16  | 9.09  | 8.49  | 8.56  |
| 1623300 at   | FBgn0035642             | 7.48  | 7.91  | 8.23  | 8.46  | 7.67  | 7.56  |
| 1626689 at   | FBgn0031182             | 6.9   | 7.33  | 7.79  | 7.71  | 7.19  | 7.38  |
| 1636967 a at | FBgn0038984             | 8.37  | 8.8   | 8.76  | 8.66  | 8.1   | 8.59  |
| 1624997 s at | FBgn0026361             | 7.68  | 8.11  | 7.83  | 8.27  | 8.17  | 8.07  |
| 1627134 at   | FBgn0026150             | 8.7   | 9.13  | 9.19  | 9.33  | 8.92  | 9.1   |
| 1636048 at   | FBgn0039403             | 7.81  | 8.24  | 8.38  | 8.41  | 8.46  | 8.5   |
| 1636759 at   | FBgn0034143             | 8.62  | 9.05  | 9.18  | 8.39  | 7.55  | 8.9   |
| 1640965 at   | FBgn0037492             | 6.42  | 6.85  | 6.77  | 6.94  | 7.04  | 6.98  |
| AFFX-Dros-1  | ---                     | 11.88 | 12.31 | 12.01 | 12.67 | 12.15 | 12.42 |
| 1632876 a at | FBgn0031319             | 8.13  | 8.56  | 7.74  | 8.04  | 7.97  | 8.38  |
| 1633022 at   | FBgn0035526             | 6.86  | 7.28  | 7.16  | 7.48  | 7.17  | 7.14  |
| 1636899 s at | FBgn0033448             | 7.45  | 7.88  | 7.89  | 7.14  | 7.17  | 7.75  |
| 1639654 at   | ---                     | 7.77  | 8.2   | 8.35  | 8.47  | 7.64  | 8.27  |
| 1625113 s at | FBgn0032363             | 9.18  | 9.61  | 9.7   | 9.24  | 9.48  | 9.93  |
| 1625997 s at | ---                     | 8.92  | 9.35  | 8.73  | 6.69  | 7.88  | 8.71  |
| 1632432 at   | FBgn0034903             | 8.52  | 8.95  | 8.2   | 7.9   | 7.49  | 8.83  |
| 1628330 at   | ---                     | 6.89  | 7.31  | 6.86  | 6.94  | 7.16  | 7.35  |
| 1626820 at   | FBgn0038477             | 7.02  | 7.44  | 7.62  | 8.09  | 7.39  | 7.44  |

|              |                         |       |       |       |       |       |       |
|--------------|-------------------------|-------|-------|-------|-------|-------|-------|
| 1637300 at   | FBgn0053199 /// FBgn003 | 7.51  | 7.93  | 8.39  | 8.14  | 7.97  | 8.24  |
| 1634052 s at | FBgn0002781             | 7.32  | 7.74  | 7.31  | 7.62  | 7.6   | 7.98  |
| 1629865 s at | FBgn0030115 /// FBgn003 | 6.82  | 7.23  | 6.95  | 7.35  | 7.17  | 7.13  |
| 1631024 s at | FBgn0031192 /// FBgn003 | 7.06  | 7.47  | 7.35  | 7.61  | 7.4   | 7.38  |
| 1631330 at   | FBgn0036008             | 9.11  | 9.53  | 9.88  | 9.99  | 9.67  | 9.87  |
| 1638783 at   | FBgn0031357             | 9.4   | 9.81  | 9.34  | 9.97  | 9.47  | 9.8   |
| 1636902 at   | ---                     | 7.86  | 8.27  | 7.94  | 8.3   | 8.28  | 8.13  |
| 1636254 s at | FBgn0038192             | 8.85  | 9.26  | 9.38  | 9.65  | 9.14  | 9.56  |
| 1633547 a at | FBgn0033613             | 10.27 | 10.68 | 11.25 | 10.79 | 10.09 | 10.81 |
| 1625722 at   | FBgn0031534             | 9.34  | 9.76  | 9.83  | 10    | 9.7   | 9.77  |
| 1632283 at   | FBgn0034186             | 7.1   | 7.52  | 7.46  | 7.91  | 7.47  | 7.44  |
| 1633051 at   | FBgn0033374 /// FBgn003 | 9.66  | 10.07 | 9.81  | 10.12 | 9.6   | 10.08 |
| 1631188 a at | FBgn0031762             | 7.01  | 7.42  | 7.31  | 7     | 6.59  | 7.15  |
| 1640485 at   | FBgn0036142             | 7.35  | 7.76  | 7.64  | 8.01  | 7.81  | 7.84  |
| 1639604 at   | FBgn0032231             | 9.57  | 9.97  | 9.58  | 10.26 | 9.9   | 9.98  |
| 1636815 a at | FBgn0002973             | 9.22  | 9.62  | 9.67  | 9.38  | 9.42  | 9.68  |
| 1633462 at   | FBgn0051365             | 9.21  | 9.61  | 9.33  | 9.24  | 9.32  | 9.52  |
| 1637570 at   | FBgn0033816             | 8.6   | 9     | 9.08  | 9.09  | 8.89  | 9.03  |
| 1624550 at   | FBgn0010287             | 8.21  | 8.61  | 8.41  | 8.77  | 8.56  | 8.86  |
| 1633455 at   | FBgn0039702             | 7.73  | 8.13  | 7.65  | 7.98  | 7.9   | 8.14  |
| 1623109 at   | FBgn0029929             | 9.57  | 9.97  | 9.97  | 10.15 | 9.51  | 10.1  |
| 1631777 a at | FBgn0027342             | 9.49  | 9.89  | 9.85  | 9.83  | 9.6   | 9.93  |
| 1624571 s at | FBgn0042218             | 10.61 | 11    | 10.67 | 10.9  | 10.48 | 10.73 |
| 1628796 at   | ---                     | 6.39  | 6.79  | 7.08  | 6.9   | 7.26  | 7.25  |
| 1639059 s at | FBgn0000615             | 11.7  | 12.1  | 11.81 | 12.06 | 11.96 | 12.04 |
| 1637197 at   | ---                     | 8.08  | 8.48  | 8.23  | 8.53  | 8.4   | 8.47  |
| 1628662 at   | FBgn0034786             | 8.46  | 8.85  | 8.57  | 8.62  | 8.44  | 8.69  |
| 1635263 at   | ---                     | 8.41  | 8.8   | 8.74  | 9.19  | 8.52  | 8.53  |
| 1641700 at   | ---                     | 7.94  | 8.33  | 7.81  | 7.99  | 8.24  | 8.32  |
| 1636412 at   | FBgn0053208             | 8.6   | 8.99  | 8.91  | 9.01  | 9.47  | 9.62  |
| 1638425 at   | FBgn0030654 /// FBgn003 | 7.28  | 7.66  | 7.22  | 7.58  | 7.31  | 7.62  |
| 1628929 s at | FBgn0033434             | 8.98  | 9.37  | 9.3   | 8.99  | 9.01  | 9.41  |
| 1634549 at   | ---                     | 10.46 | 10.84 | 9.93  | 10.21 | 10.43 | 10.71 |
| 1635987 at   | FBgn0030041             | 7.36  | 7.74  | 6.49  | 5.94  | 6.37  | 6.86  |
| 1623731 at   | FBgn0003751             | 7.24  | 7.62  | 7.39  | 7.73  | 7.57  | 7.77  |
| 1634428 at   | FBgn0032154             | 8.48  | 8.86  | 8.88  | 9.2   | 8.7   | 8.87  |

|              |             |       |       |       |       |       |       |
|--------------|-------------|-------|-------|-------|-------|-------|-------|
| 1626497 at   | ---         | 8.52  | 8.89  | 8.62  | 8.88  | 8.65  | 8.99  |
| 1624381 at   | FBgn0034924 | 7.97  | 8.35  | 7.61  | 7.56  | 7.91  | 8.44  |
| 1625044 at   | FBgn0031663 | 9.95  | 10.33 | 9.58  | 10.46 | 9.87  | 10.22 |
| 1640257 at   | FBgn0000326 | 7.35  | 7.72  | 7.75  | 7.92  | 7.77  | 7.85  |
| 1636709 at   | FBgn0033265 | 7.18  | 7.56  | 7.41  | 7.49  | 7.57  | 7.69  |
| 1631419 at   | FBgn0004047 | 12.6  | 12.97 | 12.09 | 11.23 | 12.01 | 12.82 |
| 1637405 at   | ---         | 7.1   | 7.47  | 7.51  | 7.92  | 7.16  | 7.18  |
| 1627182 at   | FBgn0035694 | 10.92 | 11.29 | 11.23 | 10.42 | 10.47 | 11.4  |
| 1624200 at   | FBgn0032934 | 7.17  | 7.54  | 7.3   | 7.97  | 7.53  | 7.56  |
| 1631672 at   | FBgn0031421 | 7.26  | 7.63  | 7.05  | 7.61  | 7.33  | 7.62  |
| 1631564 at   | FBgn0030366 | 6.97  | 7.34  | 7.07  | 6.97  | 7.14  | 7.45  |
| 1627315 s at | FBgn0033075 | 9.15  | 9.52  | 9.45  | 9.19  | 9.27  | 9.57  |
| 1623193 at   | ---         | 9.47  | 9.84  | 9.88  | 10.12 | 9.66  | 9.67  |
| 1627786 s at | ---         | 8.99  | 9.36  | 8.71  | 8.75  | 8.92  | 9.25  |
| 1638166 at   | ---         | 9.65  | 10.02 | 10.12 | 9.59  | 9.77  | 10.16 |
| 1639117 a at | FBgn0053096 | 8.74  | 9.11  | 8.72  | 9.08  | 8.55  | 8.78  |
| 1634208 a at | FBgn0004879 | 8.03  | 8.39  | 8.13  | 8.4   | 8.25  | 8.74  |
| 1627507 at   | FBgn0026570 | 7.3   | 7.66  | 7.72  | 7.81  | 7.47  | 7.83  |
| 1635618 at   | FBgn0029944 | 9.57  | 9.93  | 9.87  | 9.94  | 9.64  | 10.08 |
| 1623682 a at | FBgn0000253 | 11.75 | 12.11 | 12.05 | 12.37 | 11.99 | 12.23 |
| 1633191 at   | FBgn0036519 | 7.34  | 7.71  | 7.66  | 7.84  | 7.47  | 7.83  |
| 1631208 at   | ---         | 8.21  | 8.57  | 8.69  | 8.78  | 8.39  | 8.65  |
| 1626880 at   | FBgn0039691 | 8.84  | 9.2   | 9.4   | 9.48  | 9.1   | 9.17  |
| 1639582 at   | FBgn0032686 | 8.77  | 9.13  | 9     | 9.1   | 8.82  | 9.22  |
| 1624680 a at | ---         | 7.97  | 8.32  | 8.43  | 8.77  | 8.37  | 8.39  |
| 1630781 at   | FBgn0004811 | 9.26  | 9.62  | 9.28  | 9.23  | 9.25  | 9.62  |
| 1627512 at   | FBgn0051915 | 7.7   | 8.06  | 8.04  | 8.25  | 7.72  | 8.08  |
| 1625968 at   | FBgn0031139 | 9.9   | 10.26 | 10.16 | 9.89  | 9.79  | 10.02 |
| 1629033 at   | FBgn0035204 | 9.27  | 9.62  | 9.53  | 9.93  | 9.48  | 9.6   |
| 1629600 at   | FBgn0031356 | 9.13  | 9.49  | 9.13  | 9.31  | 9.15  | 9.46  |
| 1634349 at   | ---         | 9.05  | 9.41  | 9.58  | 9.21  | 9.24  | 9.71  |
| 1636939 at   | FBgn0032728 | 7.29  | 7.65  | 7.75  | 7.97  | 7.59  | 7.75  |
| 1634403 at   | FBgn0015567 | 7.3   | 7.66  | 8.1   | 7.52  | 6.97  | 7.65  |
| 1626182 a at | FBgn0035945 | 9.01  | 9.36  | 9.2   | 9.65  | 9.37  | 9.51  |
| 1639113 at   | FBgn0038639 | 7.98  | 8.33  | 8.18  | 8.28  | 8.24  | 8.36  |
| 1636919 at   | FBgn0002736 | 10.67 | 11.02 | 10.78 | 11.08 | 10.36 | 11.02 |

|              |                         |       |       |       |       |       |       |
|--------------|-------------------------|-------|-------|-------|-------|-------|-------|
| 1629869 s at | FBgn0021953             | 7.13  | 7.48  | 7.46  | 6.76  | 6.68  | 7.53  |
| 1623088 at   | FBgn0035461             | 7.5   | 7.85  | 7.53  | 8.4   | 7.88  | 7.91  |
| 1640798 a at | FBgn0027108             | 9.65  | 10    | 10.25 | 10.13 | 9.77  | 10.55 |
| 1622943 s at | FBgn0030323             | 8.48  | 8.82  | 8.52  | 9.07  | 8.66  | 8.85  |
| 1630130 at   | FBgn0030432             | 10.84 | 11.19 | 10.8  | 10.77 | 10.54 | 10.99 |
| 1634277 at   | FBgn0033186             | 7.07  | 7.42  | 7.22  | 7.62  | 7.22  | 7.44  |
| 1638252 at   | FBgn0010441             | 8.37  | 8.72  | 8.6   | 8.95  | 8.78  | 8.8   |
| 1632875 at   | FBgn0032705             | 9.13  | 9.48  | 9.33  | 9.74  | 9.04  | 9.38  |
| 1627214 s at | FBgn0036519             | 6.95  | 7.29  | 7.06  | 7.13  | 7.11  | 7.31  |
| 1633728 at   | FBgn0029825             | 8.03  | 8.37  | 8.04  | 8.66  | 7.63  | 8.05  |
| 1636849 at   | FBgn0033698             | 7.94  | 8.29  | 8.59  | 8.43  | 7.96  | 8.14  |
| 1626850 s at | FBgn0051953 /// FBgn003 | 8.44  | 8.78  | 8.62  | 9.06  | 8.62  | 8.65  |
| 1631062 at   | FBgn0037383             | 7.62  | 7.96  | 8     | 8.13  | 7.93  | 8.17  |
| 1631037 at   | FBgn0030501             | 9.46  | 9.8   | 9.85  | 9.95  | 9.65  | 9.88  |
| 1631525 at   | FBgn0016970             | 9.11  | 9.45  | 9.15  | 9.39  | 9.12  | 9.34  |
| 1629748 s at | FBgn0037541             | 6.61  | 6.95  | 7.1   | 7.3   | 7.02  | 7.03  |
| 1633422 a at | FBgn0005630             | 7.25  | 7.59  | 7.51  | 7.84  | 7.45  | 7.55  |
| 1635762 at   | FBgn0034270             | 8.09  | 8.43  | 7.66  | 7.98  | 8     | 8.49  |
| 1624275 at   | FBgn0016984             | 7.49  | 7.83  | 7.44  | 7.81  | 7.54  | 7.87  |
| 1629227 at   | ---                     | 7.02  | 7.35  | 7.77  | 7.85  | 7.09  | 7.48  |
| 1640818 at   | FBgn0040079             | 8.98  | 9.32  | 9.1   | 9.34  | 9.16  | 9.21  |
| 1640240 s at | FBgn0029763             | 9.46  | 9.8   | 9.97  | 10.26 | 9.74  | 9.97  |
| 1627576 at   | FBgn0033348             | 7.93  | 8.27  | 8.07  | 8.54  | 8.26  | 8.41  |
| 1633727 s at | FBgn0036896             | 7.48  | 7.81  | 8.11  | 7.64  | 7.62  | 7.96  |
| 1636302 s at | ---                     | 7.39  | 7.73  | 7.61  | 7.7   | 7.05  | 7.53  |
| 1636961 a at | FBgn0033631             | 11.1  | 11.44 | 11.1  | 10.95 | 11.04 | 11.52 |
| 1623536 s at | FBgn0035542             | 7.56  | 7.89  | 8.22  | 7.34  | 7.39  | 7.82  |
| 1641326 at   | FBgn0050118             | 7.62  | 7.95  | 8.22  | 7.94  | 7.44  | 7.85  |
| 1639185 at   | FBgn0023509             | 6.77  | 7.1   | 7.44  | 7.53  | 7.21  | 7.34  |
| 1630786 at   | FBgn0023395             | 8.77  | 9.11  | 8.87  | 9.41  | 9.1   | 9.26  |
| 1624010 a at | FBgn0033607             | 7.67  | 8     | 7.99  | 8.33  | 8.11  | 8.15  |
| 1636244 s at | FBgn0038803             | 10.15 | 10.48 | 10.72 | 10.32 | 9.88  | 10.66 |
| 1625354 at   | FBgn0015571             | 7.75  | 8.09  | 7.98  | 7.76  | 7.67  | 7.79  |
| 1640060 at   | FBgn0053096             | 9.02  | 9.35  | 8.98  | 9.22  | 8.79  | 8.92  |
| 1631614 at   | FBgn0034351             | 7.86  | 8.2   | 8.11  | 8.19  | 7.84  | 8.32  |
| 1625310 at   | FBgn0036565             | 8.16  | 8.49  | 8.12  | 8.44  | 8.49  | 8.75  |



|              |                         |       |       |       |       |       |       |
|--------------|-------------------------|-------|-------|-------|-------|-------|-------|
| 1623179 at   | FBgn0031549             | 7.39  | 7.72  | 7.89  | 8.14  | 7.67  | 7.66  |
| 1624302 at   | FBgn0039730             | 8.39  | 8.72  | 8.14  | 8.52  | 8.36  | 8.74  |
| 1633384 at   | FBgn0032921             | 9.01  | 9.34  | 9.18  | 9.19  | 8.99  | 9.42  |
| 1636929 at   | ---                     | 7.81  | 8.14  | 8.31  | 8.44  | 8.25  | 8.35  |
| 1623505 s at | ---                     | 12.84 | 13.17 | 12.59 | 12.92 | 12.77 | 12.96 |
| 1640554 at   | FBgn0002781             | 7.56  | 7.89  | 7.34  | 7.65  | 7.55  | 7.81  |
| 1635945 at   | FBgn0031439             | 7.56  | 7.88  | 7.74  | 7.58  | 6.82  | 7.65  |
| 1630005 at   | ---                     | 12.29 | 12.62 | 11.79 | 12.07 | 12.12 | 12.36 |
| 1627460 at   | FBgn0033683             | 9.85  | 10.18 | 9.84  | 9.81  | 9.74  | 9.88  |
| 1625759 at   | FBgn0041627             | 7.43  | 7.75  | 7.72  | 8.39  | 7.82  | 7.37  |
| 1640327 at   | FBgn0030912             | 6.91  | 7.24  | 7.54  | 8.26  | 7.07  | 7.01  |
| 1641532 at   | ---                     | 8.62  | 8.95  | 9.49  | 9.65  | 8.89  | 9.13  |
| 1625348 s at | FBgn0031664             | 8.78  | 9.1   | 9.09  | 9.52  | 9.14  | 9.1   |
| 1627431 at   | FBgn0034009             | 8.42  | 8.75  | 8.51  | 8.55  | 8.5   | 8.96  |
| 1639318 at   | ---                     | 9.98  | 10.31 | 10.19 | 10.27 | 9.88  | 10.1  |
| 1640096 at   | ---                     | 8.01  | 8.33  | 8.08  | 8.22  | 8.11  | 8.22  |
| 1632946 at   | ---                     | 9.96  | 10.28 | 9.97  | 10.31 | 10.29 | 10.34 |
| 1626702 at   | FBgn0027343             | 6.74  | 7.06  | 6.89  | 6.82  | 7.16  | 7.29  |
| 1633557 at   | FBgn0036569             | 7.06  | 7.38  | 7.29  | 7.26  | 7.23  | 7.38  |
| 1623404 at   | FBgn0028932             | 7.13  | 7.45  | 7.75  | 7.46  | 7.38  | 7.64  |
| 1634041 at   | ---                     | 9.99  | 10.31 | 10.43 | 10.35 | 10.16 | 10.29 |
| 1640431 at   | FBgn0011774             | 8.67  | 8.99  | 8.75  | 9.29  | 8.97  | 9.08  |
| 1631099 at   | FBgn0034748             | 7.78  | 8.1   | 8.15  | 8.44  | 8.12  | 8.12  |
| 1625367 at   | FBgn0037734             | 6.96  | 7.28  | 7.24  | 7.49  | 7.23  | 7.42  |
| 1625083 at   | FBgn0004400             | 8.79  | 9.11  | 9.34  | 9.1   | 9.05  | 9.12  |
| 1633716 at   | FBgn0032845             | 7.32  | 7.64  | 7.62  | 7.74  | 7.6   | 7.84  |
| 1641055 at   | FBgn0001224             | 7.59  | 7.91  | 7.26  | 7.55  | 9     | 8.94  |
| 1627278 s at | FBgn0031187             | 7.58  | 7.9   | 8.21  | 8.17  | 7.88  | 8.03  |
| 1640665 at   | FBgn0036192             | 7.24  | 7.56  | 7.29  | 7.5   | 7.29  | 7.53  |
| 1626215 at   | FBgn0030240             | 7.34  | 7.66  | 6.96  | 7.3   | 7.24  | 7.46  |
| 1639916 at   | FBgn0035276 /// FBgn003 | 7.42  | 7.74  | 7.64  | 7.51  | 7.68  | 7.71  |
| 1623037 a at | FBgn0025698             | 8.55  | 8.86  | 9.08  | 8.96  | 8.49  | 8.64  |
| 1624970 s at | FBgn0001980             | 8.68  | 9     | 9.14  | 9.32  | 8.99  | 9.01  |
| 1638621 at   | FBgn0051648             | 8.21  | 8.52  | 8.43  | 8.93  | 8.41  | 8.6   |
| 1623985 at   | ---                     | 8.71  | 9.02  | 8.82  | 9.03  | 8.92  | 9.19  |
| 1638352 at   | FBgn0035073             | 7.33  | 7.64  | 7.69  | 8.05  | 7.55  | 7.57  |

|              |                         |       |       |       |       |       |       |
|--------------|-------------------------|-------|-------|-------|-------|-------|-------|
| 1636660 at   | FBgn0038446             | 9.41  | 9.73  | 9.6   | 9.83  | 9.66  | 9.72  |
| 1624156 at   | FBgn0040259             | 8.29  | 8.6   | 8.89  | 9.04  | 8.65  | 8.81  |
| 1630640 at   | FBgn0032161             | 8.33  | 8.64  | 8.32  | 9.11  | 8.47  | 8.62  |
| 1635088 at   | FBgn0029975             | 10.7  | 11.01 | 10.62 | 10.59 | 10.61 | 10.88 |
| 1634165 at   | FBgn0040364             | 7.71  | 8.02  | 8.53  | 7.23  | 7.09  | 7.59  |
| 1623022 at   | FBgn0035312             | 7.83  | 8.14  | 7.73  | 8.44  | 7.77  | 8.35  |
| 1635997 a at | FBgn0031842             | 9.66  | 9.97  | 9.52  | 9.61  | 9.48  | 10    |
| 1641360 at   | FBgn0036356             | 8.58  | 8.89  | 8.5   | 8.86  | 8.7   | 8.8   |
| 1632837 at   | FBgn0030008             | 7.26  | 7.57  | 7.29  | 7.62  | 7.71  | 7.65  |
| 1639085 at   | FBgn0031972             | 7.79  | 8.1   | 7.75  | 8.24  | 7.94  | 8.14  |
| 1637336 at   | FBgn0038974             | 7.5   | 7.81  | 7.96  | 8.3   | 7.9   | 7.93  |
| 1633766 at   | FBgn0036564             | 7.76  | 8.07  | 7.72  | 8.24  | 7.82  | 7.83  |
| 1631342 at   | FBgn0023212             | 10.42 | 10.72 | 10.45 | 10.58 | 10.57 | 10.84 |
| 1623058 at   | ---                     | 8.7   | 9     | 9.01  | 8.87  | 8.9   | 9.1   |
| 1639937 at   | FBgn0001995             | 9.75  | 10.05 | 9.94  | 9.97  | 9.9   | 10.09 |
| 1636805 a at | FBgn0030680             | 7.72  | 8.02  | 7.55  | 7.54  | 7.64  | 8.14  |
| 1625919 at   | FBgn0033549             | 9.15  | 9.45  | 8.89  | 9.42  | 9.02  | 9.28  |
| 1624897 at   | ---                     | 8.33  | 8.63  | 8.01  | 8.24  | 8.24  | 8.73  |
| 1630409 at   | FBgn0030500             | 9.07  | 9.37  | 9.38  | 9.79  | 9.4   | 9.31  |
| 1639398 at   | FBgn0015240             | 8.98  | 9.29  | 9.12  | 9.26  | 9.09  | 9.3   |
| 1635368 at   | FBgn0040366             | 7.87  | 8.17  | 8.1   | 8.44  | 8.32  | 8.47  |
| 1627257 at   | FBgn0038763             | 8.93  | 9.23  | 8.92  | 8.94  | 9.04  | 9.26  |
| 1638410 at   | FBgn0032644             | 9.06  | 9.36  | 9.26  | 9.52  | 9.19  | 9.38  |
| 1628492 at   | FBgn0000109             | 8.58  | 8.88  | 8.69  | 8.9   | 8.69  | 8.97  |
| 1628788 a at | FBgn0000499             | 8.87  | 9.17  | 8.8   | 9.09  | 9     | 9.07  |
| 1627665 at   | FBgn0032997             | 9.69  | 9.98  | 9.92  | 10.17 | 10.01 | 10.14 |
| 1631034 at   | ---                     | 10.56 | 10.86 | 10.41 | 10.94 | 10.8  | 10.88 |
| 1637768 at   | FBgn0050100             | 8.26  | 8.56  | 9.03  | 9.22  | 8.45  | 8.73  |
| 1627646 at   | ---                     | 8.22  | 8.51  | 8.58  | 8.69  | 8.57  | 8.71  |
| 1641097 at   | FBgn0031379             | 8.3   | 8.6   | 8.51  | 8.77  | 8.42  | 8.69  |
| 1632352 a at | FBgn0050007             | 6.93  | 7.23  | 7.08  | 7.39  | 7.12  | 7.14  |
| 1627956 x at | FBgn0031054             | 6.84  | 7.14  | 6.78  | 7.22  | 7.03  | 7.4   |
| 1639048 a at | FBgn0053199 /// FBgn003 | 7.42  | 7.72  | 8.34  | 7.99  | 7.79  | 8.2   |
| 1630808 at   | ---                     | 9.21  | 9.5   | 9.53  | 9.6   | 9.77  | 9.78  |
| 1626323 s at | FBgn0030205             | 10.11 | 10.4  | 10.39 | 10.37 | 10.23 | 10.52 |
| 1639946 at   | FBgn0037880             | 8.21  | 8.5   | 8.18  | 8.51  | 8.2   | 8.39  |

|              |                         |       |       |       |       |       |       |
|--------------|-------------------------|-------|-------|-------|-------|-------|-------|
| 1636736 s at | ---                     | 7.77  | 8.06  | 7.3   | 7.56  | 8.03  | 8.06  |
| 1637444 s at | FBgn0037822 /// FBgn002 | 8.22  | 8.51  | 7.88  | 8.36  | 8.3   | 8.41  |
| 1639592 at   | FBgn0034724             | 8.29  | 8.58  | 9.09  | 8.26  | 7.93  | 8.52  |
| 1629709 at   | FBgn0025874             | 8.01  | 8.31  | 8.19  | 8.59  | 8.32  | 8.38  |
| 1630411 at   | FBgn0034527             | 8.1   | 8.4   | 8.37  | 8.23  | 8.25  | 8.59  |
| 1636574 s at | FBgn0053056             | 7.71  | 8     | 7.56  | 7.47  | 7.84  | 8.07  |
| 1627052 at   | FBgn0029936             | 7.68  | 7.97  | 7.85  | 8.51  | 8.05  | 7.94  |
| 1635849 at   | FBgn0037251             | 9.35  | 9.65  | 9.09  | 9.24  | 9.15  | 9.46  |
| 1624565 a at | FBgn0036032             | 7.46  | 7.75  | 7.44  | 7.71  | 7.51  | 7.67  |
| 1625283 at   | FBgn0002781             | 7.13  | 7.42  | 7.19  | 7.48  | 7.31  | 7.44  |
| 1628037 at   | FBgn0044030             | 6.9   | 7.19  | 7.37  | 7.43  | 7.19  | 7.13  |
| 1632151 at   | FBgn0034817             | 7.94  | 8.23  | 8.53  | 8.26  | 8.05  | 8.13  |
| 1629145 at   | FBgn0031107             | 7.6   | 7.89  | 8.06  | 7.9   | 7.98  | 8.07  |
| 1630414 at   | FBgn0039135             | 10.02 | 10.31 | 9.87  | 10.28 | 10.47 | 10.38 |
| 1632011 at   | ---                     | 8.97  | 9.25  | 8.59  | 8.73  | 9.18  | 9.16  |
| 1629408 s at | FBgn0050387             | 8.78  | 9.06  | 9.19  | 9.23  | 8.82  | 9.25  |
| 1629879 at   | FBgn0034523             | 7.15  | 7.44  | 7.64  | 8.02  | 7.8   | 7.46  |
| 1634767 at   | FBgn0038407             | 8.6   | 8.89  | 9.18  | 8.8   | 8.1   | 8.83  |
| 1629894 at   | FBgn0029913             | 7.67  | 7.95  | 7.48  | 7.65  | 7.79  | 7.91  |
| 1628456 at   | ---                     | 7.77  | 8.06  | 7.86  | 8.36  | 7.84  | 8.02  |
| 1638663 at   | FBgn0026571             | 10.55 | 10.83 | 10.92 | 10.52 | 10.41 | 10.73 |
| 1623358 at   | FBgn0050381             | 7.46  | 7.74  | 7.41  | 7.41  | 7.57  | 7.67  |
| 1638217 at   | FBgn0032799             | 9.81  | 10.09 | 10    | 10.12 | 9.88  | 10.03 |
| 1634814 at   | FBgn0035877             | 7.4   | 7.69  | 7.75  | 7.64  | 7.38  | 7.55  |
| 1641655 at   | FBgn0035334             | 9.62  | 9.9   | 9.97  | 10.06 | 9.92  | 9.92  |
| 1632672 at   | FBgn0034083             | 8.31  | 8.59  | 8.41  | 7.72  | 8.16  | 8.56  |
| 1635222 at   | FBgn0033463             | 6.9   | 7.19  | 7.26  | 7.44  | 7.27  | 7.27  |
| 1633523 at   | FBgn0036271             | 8.43  | 8.71  | 8.39  | 8.58  | 8.43  | 8.61  |
| 1633448 at   | FBgn0031640             | 8.3   | 8.58  | 8.17  | 8.7   | 8.39  | 8.49  |
| 1624181 at   | FBgn0028469             | 9.58  | 9.86  | 9.52  | 9.55  | 9.52  | 9.63  |
| 1638933 at   | FBgn0002901             | 7.95  | 8.23  | 8.02  | 8.45  | 8.19  | 8.27  |
| 1634001 at   | FBgn0033607             | 8.93  | 9.21  | 9.32  | 9.52  | 9.29  | 9.4   |
| 1628438 at   | FBgn0031752             | 7.42  | 7.7   | 7.6   | 7.72  | 7.64  | 7.83  |
| 1624247 at   | FBgn0034908             | 7.28  | 7.56  | 7.67  | 7.74  | 7.57  | 7.58  |
| 1640930 at   | FBgn0026317             | 9.02  | 9.3   | 9.34  | 9.37  | 9.3   | 9.5   |
| 1625183 at   | FBgn0016930             | 7.13  | 7.41  | 7.09  | 6.71  | 6.84  | 7.2   |

|              |                         |       |       |       |       |       |       |
|--------------|-------------------------|-------|-------|-------|-------|-------|-------|
| 1623993 at   | FBgn0031287 /// FBgn003 | 7.81  | 8.09  | 7.96  | 8.77  | 8.08  | 8.08  |
| 1637133 x at | FBgn0035552             | 8.28  | 8.56  | 8.31  | 7.71  | 7.96  | 8.66  |
| 1628638 at   | FBgn0032671             | 9.01  | 9.29  | 9.18  | 9.31  | 9.13  | 9.3   |
| 1641253 at   | FBgn0003501             | 9.5   | 9.78  | 9.5   | 9.47  | 9.35  | 9.63  |
| 1638935 at   | FBgn0038099             | 10.12 | 10.4  | 10.18 | 10.4  | 10.26 | 10.35 |
| 1629725 at   | FBgn0038270             | 7.66  | 7.94  | 7.72  | 7.89  | 8.09  | 8.22  |
| 1630824 a at | FBgn0053145             | 9.05  | 9.33  | 9.26  | 9.74  | 9.18  | 9.47  |
| 1638112 at   | FBgn0030274             | 8.88  | 9.16  | 9.1   | 9.38  | 9.22  | 9.36  |
| 1639346 at   | FBgn0031815             | 8.69  | 8.97  | 8.75  | 9.12  | 8.96  | 9.23  |
| 1638244 s at | FBgn0036043             | 8.78  | 9.06  | 8.72  | 9.31  | 8.49  | 8.96  |
| 1631363 at   | FBgn0031886             | 8.96  | 9.24  | 9.02  | 9.69  | 9.19  | 9.34  |
| 1635754 at   | ---                     | 9.21  | 9.49  | 9.58  | 9.38  | 9.4   | 9.68  |
| 1634193 at   | FBgn0032251             | 8.53  | 8.8   | 8.61  | 8.86  | 9.01  | 9.19  |
| 1629691 at   | FBgn0039358             | 10.14 | 10.42 | 10.42 | 9.6   | 10.43 | 10.42 |
| 1623725 at   | FBgn0030995             | 7.46  | 7.74  | 7.37  | 7.61  | 7.38  | 7.35  |
| 1630537 a at | ---                     | 9.02  | 9.3   | 8.97  | 9.06  | 9.15  | 9.35  |
| 1624580 at   | FBgn0037696             | 7.6   | 7.88  | 7.8   | 8.1   | 7.85  | 7.93  |
| 1623552 s at | FBgn0040030             | 9.64  | 9.91  | 9.84  | 9.92  | 9.35  | 9.41  |
| 1623873 at   | FBgn0045073             | 10.12 | 10.39 | 10.25 | 10.47 | 10.22 | 10.34 |
| 1633436 at   | FBgn0036105             | 7.38  | 7.65  | 7.16  | 7.54  | 7.83  | 7.9   |
| 1632731 at   | FBgn0033924             | 8.15  | 8.42  | 8.26  | 8.76  | 8.37  | 8.61  |
| 1625731 at   | FBgn0032127             | 10.51 | 10.79 | 10.31 | 8.19  | 8.18  | 10.68 |
| 1635874 at   | FBgn0031265             | 7.21  | 7.48  | 7.59  | 7.31  | 7.3   | 7.35  |
| 1638897 at   | FBgn0035027             | 8.59  | 8.86  | 8.95  | 9.07  | 8.85  | 8.87  |
| 1626123 at   | ---                     | 7.59  | 7.86  | 7.14  | 7.09  | 7.63  | 7.7   |
| 1632281 at   | FBgn0034598             | 8.41  | 8.68  | 8.69  | 8.6   | 8.53  | 8.96  |
| 1638278 s at | FBgn0010246             | 7.36  | 7.64  | 8.31  | 7.77  | 6.98  | 7.72  |
| 1629427 at   | FBgn0035942             | 7.56  | 7.83  | 7.58  | 7.97  | 7.73  | 7.75  |
| 1637397 a at | FBgn0039206             | 7.66  | 7.93  | 7.72  | 7.8   | 7.97  | 7.98  |
| 1630884 at   | ---                     | 10.31 | 10.58 | 10.42 | 10.64 | 10.63 | 10.79 |
| 1637547 at   | FBgn0037709             | 9.08  | 9.35  | 9.45  | 9.4   | 9.1   | 9.28  |
| 1623769 at   | FBgn0030968             | 8.11  | 8.38  | 8.25  | 8.13  | 8.16  | 8.4   |
| 1635013 s at | FBgn0032848             | 7.82  | 8.09  | 8.05  | 8.27  | 8.08  | 8     |
| 1640280 at   | FBgn0005630             | 7.92  | 8.19  | 8.1   | 8.29  | 7.86  | 8.07  |
| 1637175 at   | FBgn0037356             | 9.2   | 9.47  | 9.06  | 9.23  | 9.22  | 9.32  |
| 1633836 a at | FBgn0010470             | 9.81  | 10.08 | 10.39 | 9.6   | 9.1   | 10.03 |

|              |             |       |       |       |       |       |       |
|--------------|-------------|-------|-------|-------|-------|-------|-------|
| 1630542 at   | FBgn0037382 | 8.31  | 8.58  | 8.61  | 8.75  | 8.54  | 8.52  |
| 1622968 at   | ---         | 7.75  | 8.02  | 8.12  | 8.23  | 7.96  | 7.93  |
| 1625747 at   | FBgn0038747 | 9.34  | 9.61  | 9.44  | 9.57  | 9.39  | 9.73  |
| 1631784 at   | FBgn0039291 | 9.02  | 9.28  | 8.97  | 9.51  | 9.12  | 9.24  |
| 1625879 at   | FBgn0032884 | 9.33  | 9.6   | 9.63  | 9.67  | 9.51  | 9.91  |
| AFFX-Dros-C  | FBgn0001092 | 12.67 | 12.94 | 12.95 | 13.12 | 13.02 | 13.1  |
| 1628111 at   | ---         | 8     | 8.27  | 8.23  | 8.63  | 8.33  | 8.42  |
| 1639265 at   | FBgn0039766 | 7.89  | 8.15  | 8.11  | 8.63  | 8.01  | 8.17  |
| 1635729 a at | FBgn0003138 | 8.63  | 8.9   | 8.94  | 9.29  | 8.73  | 8.8   |
| 1627154 at   | FBgn0034945 | 8.56  | 8.83  | 8.8   | 9.01  | 8.95  | 8.98  |
| 1640326 at   | ---         | 7.26  | 7.53  | 7.18  | 7.21  | 7.41  | 7.61  |
| 1635302 at   | FBgn0002878 | 8.19  | 8.46  | 8.14  | 8.69  | 8.39  | 8.48  |
| 1635664 at   | FBgn0011566 | 7.58  | 7.84  | 7.64  | 7.61  | 7.76  | 7.82  |
| 1623881 s at | FBgn0029783 | 7.64  | 7.9   | 7.81  | 8.24  | 8.1   | 8.11  |
| 1640110 at   | FBgn0030266 | 6.8   | 7.06  | 7.08  | 6.87  | 7.05  | 7.06  |
| 1635526 at   | ---         | 7.22  | 7.48  | 7.23  | 7.59  | 7.66  | 7.56  |
| 1640805 at   | FBgn0033718 | 7.91  | 8.18  | 8.16  | 8.21  | 8.19  | 8.09  |
| 1628791 at   | FBgn0035270 | 7.2   | 7.47  | 7.28  | 7.5   | 7.22  | 7.49  |
| 1629923 at   | FBgn0031710 | 7.69  | 7.95  | 7.75  | 7.72  | 7.6   | 7.74  |
| 1623209 at   | FBgn0036386 | 7.33  | 7.6   | 7.43  | 7.81  | 7.43  | 7.64  |
| 1640405 at   | FBgn0010497 | 10.93 | 11.19 | 11.27 | 11.28 | 11.09 | 11.19 |
| 1635560 at   | FBgn0032285 | 7.7   | 7.97  | 7.6   | 7.94  | 7.76  | 8.13  |
| 1641576 a at | FBgn0038344 | 7.05  | 7.31  | 7.63  | 7.61  | 7.33  | 7.4   |
| 1625026 at   | FBgn0040609 | 8.03  | 8.29  | 7.25  | 7.58  | 7.99  | 7.66  |
| 1633254 at   | FBgn0032020 | 8.96  | 9.22  | 9.27  | 9.23  | 9.08  | 9.39  |
| AFFX-r2-Bs-t | ---         | 7.02  | 7.29  | 6.97  | 7.33  | 7.21  | 7.02  |
| 1638215 at   | FBgn0037610 | 8.25  | 8.51  | 8.24  | 8.24  | 8.71  | 8.62  |
| 1625568 a at | FBgn0034419 | 9.14  | 9.4   | 9.39  | 9.49  | 9.46  | 9.63  |
| 1636960 a at | FBgn0033522 | 9.15  | 9.41  | 9.57  | 9.37  | 9.13  | 9.46  |
| 1628138 s at | FBgn0029525 | 7.38  | 7.64  | 7.61  | 7.38  | 7.51  | 7.52  |
| 1634314 s at | FBgn0001248 | 11.21 | 11.47 | 11.5  | 11.4  | 11.15 | 11.18 |
| 1639752 at   | FBgn0030766 | 8.37  | 8.63  | 8.24  | 8.42  | 8.57  | 8.86  |
| 1632485 a at | FBgn0015772 | 8.35  | 8.61  | 8.58  | 8.31  | 8.32  | 8.58  |
| 1624226 at   | FBgn0038055 | 8.13  | 8.39  | 8.21  | 8.27  | 8.35  | 8.37  |
| 1638963 s at | FBgn0034091 | 9.92  | 10.18 | 10.28 | 10.34 | 9.96  | 10.12 |
| 1628249 at   | FBgn0036118 | 7.71  | 7.97  | 8.28  | 8.45  | 7.85  | 7.88  |

|              |             |       |       |       |       |       |       |
|--------------|-------------|-------|-------|-------|-------|-------|-------|
| 1626379 a at | FBgn0040009 | 7.99  | 8.25  | 8.1   | 8.43  | 8.4   | 8.42  |
| 1628458 at   | ---         | 8.57  | 8.83  | 8.62  | 8.97  | 8.99  | 9.16  |
| 1635444 at   | ---         | 9.03  | 9.29  | 8.95  | 9.15  | 9.02  | 9.19  |
| 1633166 at   | FBgn0033569 | 9.15  | 9.41  | 9.53  | 9.74  | 9.39  | 9.42  |
| 1628985 a at | FBgn0013759 | 8.47  | 8.72  | 8.35  | 8.68  | 8.45  | 8.73  |
| 1628148 at   | FBgn0025549 | 9.68  | 9.94  | 9.78  | 9.91  | 9.72  | 9.79  |
| 1623847 at   | FBgn0034425 | 8.82  | 9.08  | 8.99  | 9.33  | 9.04  | 9.09  |
| 1628198 at   | FBgn0002989 | 8.23  | 8.49  | 8.26  | 8.36  | 8.16  | 8.48  |
| 1641451 at   | FBgn0035964 | 9.09  | 9.35  | 8.91  | 8.92  | 8.9   | 8.82  |
| 1631880 at   | FBgn0030361 | 7.18  | 7.44  | 7     | 7.4   | 7.3   | 7.48  |
| 1622992 at   | FBgn0002673 | 8.99  | 9.25  | 8.74  | 9.26  | 9.07  | 9.47  |
| 1628977 at   | FBgn0034763 | 6.88  | 7.13  | 7.44  | 7.47  | 7.64  | 7.89  |
| 1626456 at   | FBgn0052701 | 9.36  | 9.61  | 10.22 | 9.88  | 9.24  | 9.57  |
| 1630975 at   | FBgn0030189 | 7.16  | 7.41  | 7.02  | 6.79  | 7.37  | 7.44  |
| 1637537 at   | FBgn0000464 | 7.43  | 7.69  | 7.33  | 7.36  | 7.41  | 7.68  |
| 1633055 at   | FBgn0031395 | 9.22  | 9.48  | 9.22  | 9.31  | 9.25  | 9.51  |
| 1641224 s at | FBgn0030421 | 7.51  | 7.76  | 7.66  | 8.04  | 7.84  | 8     |
| 1623430 at   | FBgn0019948 | 6.92  | 7.17  | 6.88  | 7.12  | 7.33  | 7.32  |
| 1639785 s at | FBgn0015930 | 10.49 | 10.74 | 10.41 | 10.32 | 10.19 | 10.57 |
| 1635130 a at | FBgn0019932 | 9.31  | 9.56  | 9.51  | 9.49  | 9.48  | 9.59  |
| 1641342 at   | ---         | 8.54  | 8.79  | 8.67  | 8.64  | 9.06  | 9.2   |
| 1633691 at   | ---         | 7.5   | 7.75  | 7.59  | 7.95  | 7.61  | 7.79  |
| 1626520 at   | FBgn0025808 | 8.18  | 8.44  | 8.2   | 8.56  | 8.41  | 8.64  |
| 1634258 at   | FBgn0002781 | 8.62  | 8.88  | 8.62  | 9.14  | 8.83  | 8.96  |
| 1639471 s at | ---         | 9.83  | 10.08 | 10.02 | 10.13 | 9.95  | 9.99  |
| 1635449 s at | FBgn0000454 | 12.04 | 12.29 | 12.42 | 12.38 | 12.2  | 12.18 |
| 1637190 at   | FBgn0035203 | 9.78  | 10.03 | 9.84  | 10.14 | 10.05 | 10    |
| 1637479 at   | FBgn0003116 | 8.57  | 8.82  | 8.66  | 8.96  | 8.67  | 8.65  |
| 1623885 at   | FBgn0015568 | 8.86  | 9.11  | 9.25  | 9.35  | 9.1   | 9.15  |
| 1640079 at   | FBgn0028434 | 8.3   | 8.55  | 8.21  | 8.57  | 8.3   | 8.58  |
| 1630763 at   | FBgn0035099 | 7.01  | 7.26  | 6.62  | 6.55  | 6.8   | 7.37  |
| 1623602 a at | FBgn0014007 | 7.89  | 8.14  | 7.57  | 7.91  | 7.67  | 8.11  |
| 1637602 at   | FBgn0023511 | 7.78  | 8.03  | 7.82  | 7.86  | 8.01  | 8.12  |
| 1630503 at   | FBgn0038349 | 8.84  | 9.09  | 9.09  | 9.09  | 8.89  | 8.94  |
| 1629695 at   | FBgn0038739 | 10.13 | 10.38 | 10.09 | 10.32 | 10.14 | 10.62 |
| 1627489 a at | FBgn0034638 | 8.61  | 8.86  | 8.36  | 8.67  | 8.36  | 8.78  |

|              |                         |       |       |       |       |       |       |
|--------------|-------------------------|-------|-------|-------|-------|-------|-------|
| 1635482 at   | FBgn0031633             | 9.13  | 9.38  | 8.96  | 9.76  | 9.29  | 9.33  |
| 1632827 a at | FBgn0004698             | 9.63  | 9.88  | 9.73  | 9.98  | 9.65  | 9.76  |
| 1624230 s at | FBgn0003943             | 12.07 | 12.32 | 11.84 | 12.51 | 12.17 | 12.28 |
| 1634729 at   | FBgn0032760             | 8.09  | 8.34  | 7.98  | 7.99  | 7.97  | 8.15  |
| 1626933 s at | FBgn0035205             | 8.43  | 8.68  | 8.92  | 8.82  | 8.6   | 8.58  |
| 1637194 at   | FBgn0034876             | 9.76  | 10.01 | 9.7   | 9.68  | 9.77  | 9.94  |
| 1630306 at   | FBgn0035528             | 9.96  | 10.21 | 9.97  | 10.1  | 9.9   | 10.11 |
| 1633643 a at | ---                     | 8.57  | 8.82  | 8.77  | 9.04  | 8.73  | 8.84  |
| 1639689 at   | FBgn0002948             | 9.76  | 10.01 | 9.88  | 10.25 | 9.93  | 10.03 |
| 1631092 at   | FBgn0037606             | 8.48  | 8.73  | 8.65  | 8.84  | 8.84  | 8.8   |
| 1638480 at   | FBgn0014022             | 8.29  | 8.53  | 8.32  | 8.37  | 8.42  | 8.68  |
| 1640582 at   | FBgn0035995             | 9.01  | 9.26  | 9.24  | 9.27  | 9.21  | 9.29  |
| 1639074 at   | FBgn0035802             | 8.79  | 9.04  | 9.05  | 9.06  | 8.42  | 8.91  |
| 1637263 at   | FBgn0038996             | 8.94  | 9.18  | 9.25  | 9.51  | 9.3   | 9.35  |
| 1641124 at   | ---                     | 8.92  | 9.17  | 9.09  | 9.26  | 8.93  | 9.25  |
| 1636579 s at | FBgn0004797             | 8.58  | 8.83  | 8.47  | 8.35  | 8.25  | 8.52  |
| 1638635 at   | FBgn0035892             | 8.06  | 8.3   | 8.09  | 8.25  | 8.34  | 8.5   |
| 1626571 at   | FBgn0035838 /// FBgn002 | 7.87  | 8.12  | 8.21  | 8.21  | 8.21  | 8.24  |
| 1635939 a at | FBgn0031483             | 10.44 | 10.68 | 10.76 | 11.06 | 10.38 | 10.77 |
| 1632543 at   | FBgn0033639             | 7.41  | 7.65  | 7.68  | 7.51  | 7.32  | 7.47  |
| 1624806 at   | FBgn0041709             | 11.78 | 12.02 | 11.23 | 9.04  | 9.16  | 12.08 |
| 1625269 at   | FBgn0035336             | 8.07  | 8.32  | 8.4   | 8.21  | 8.24  | 8.3   |
| 1628353 at   | FBgn0001149             | 13.1  | 13.34 | 13.04 | 13.6  | 13.37 | 13.38 |
| 1639890 at   | FBgn0039970             | 10.87 | 11.12 | 10.92 | 11.47 | 11.37 | 11.36 |
| 1626300 at   | FBgn0031098             | 9.21  | 9.45  | 9.2   | 9.45  | 9.52  | 9.7   |
| 1637763 a at | FBgn0033673             | 8.67  | 8.92  | 8.56  | 8.88  | 8.78  | 8.87  |
| 1635165 a at | FBgn0035227             | 7.28  | 7.52  | 7.39  | 7.59  | 7.39  | 7.54  |
| 1636909 at   | FBgn0029798             | 8.07  | 8.31  | 7.7   | 8     | 8.09  | 8.25  |
| 1630274 s at | FBgn0035232             | 7.39  | 7.63  | 7.7   | 7.63  | 7.37  | 7.61  |
| 1639994 at   | FBgn0029874             | 7.82  | 8.06  | 7.71  | 7.63  | 7.74  | 8.06  |
| 1633186 s at | FBgn0035207             | 8.25  | 8.49  | 8.48  | 8.64  | 8.37  | 8.52  |
| 1638994 at   | FBgn0036298             | 9.81  | 10.05 | 10.19 | 10.38 | 10.3  | 10.25 |
| 1641365 s at | ---                     | 9.41  | 9.66  | 9.85  | 8.48  | 8.55  | 9.46  |
| 1626306 at   | FBgn0026181             | 7.47  | 7.71  | 7.72  | 7.79  | 7.88  | 7.96  |
| 1636311 at   | FBgn0001128             | 8.36  | 8.6   | 7.91  | 7.79  | 7.98  | 8.45  |
| 1626476 at   | FBgn0051457             | 9.12  | 9.36  | 9.31  | 9.58  | 9.49  | 9.42  |

|              |                         |       |       |       |       |       |       |
|--------------|-------------------------|-------|-------|-------|-------|-------|-------|
| 1627246 at   | FBgn0020388             | 8.94  | 9.18  | 8.98  | 9.33  | 9.08  | 9.04  |
| 1629949 at   | FBgn0037244             | 10.55 | 10.79 | 10.61 | 10.74 | 10.7  | 10.85 |
| 1635260 at   | FBgn0027363             | 8.84  | 9.08  | 9.01  | 9.32  | 8.88  | 9.09  |
| 1625258 at   | ---                     | 9.03  | 9.27  | 9.12  | 9.6   | 9.19  | 9.39  |
| 1629634 at   | FBgn0029985             | 7.55  | 7.79  | 7.42  | 7.78  | 7.47  | 7.46  |
| 1625814 at   | ---                     | 8.77  | 9.01  | 8.77  | 8.8   | 8.89  | 9.05  |
| 1639810 at   | FBgn0004556             | 8.14  | 8.38  | 8.61  | 8.56  | 8.3   | 8.48  |
| 1628536 s at | FBgn0039637             | 8.97  | 9.21  | 9.28  | 9.16  | 8.41  | 9.12  |
| 1624502 a at | FBgn0037467             | 7.59  | 7.83  | 8.01  | 7.83  | 7.25  | 7.58  |
| 1629374 at   | FBgn0004797             | 8.18  | 8.42  | 8.43  | 8.65  | 8.4   | 8.49  |
| 1623401 a at | FBgn0033998             | 7.2   | 7.43  | 7.83  | 8.08  | 7.53  | 7.36  |
| 1633586 at   | FBgn0036255             | 8.86  | 9.1   | 9.08  | 9.45  | 9.02  | 9.03  |
| 1627497 at   | FBgn0035631             | 11.07 | 11.31 | 11.22 | 11.33 | 11.15 | 11.25 |
| 1631130 at   | FBgn0038855             | 9.14  | 9.38  | 9.26  | 9.32  | 9.28  | 9.29  |
| 1636868 at   | FBgn0032378             | 8.89  | 9.13  | 8.87  | 8.87  | 8.86  | 9.19  |
| 1638779 at   | FBgn0043472             | 9.82  | 10.06 | 9.9   | 10.18 | 10.1  | 10.18 |
| 1634217 s at | FBgn0024811             | 10.6  | 10.84 | 10.88 | 10.87 | 10.86 | 10.97 |
| 1633390 at   | FBgn0030702             | 8.47  | 8.71  | 8.47  | 8.04  | 8.51  | 8.82  |
| 1631822 at   | ---                     | 8.23  | 8.47  | 8.17  | 7.8   | 8.11  | 8.43  |
| 1637387 s at | FBgn0013334             | 7.51  | 7.74  | 7.73  | 7.77  | 7.41  | 7.36  |
| 1638460 s at | FBgn0031066 /// FBgn004 | 7.18  | 7.42  | 7.02  | 7.21  | 6.88  | 7.13  |
| 1631264 at   | FBgn0035211             | 8.05  | 8.29  | 8.03  | 7.97  | 8.15  | 8.3   |
| 1635290 at   | FBgn0024360             | 8.96  | 9.19  | 9.1   | 9.37  | 9.13  | 9.15  |
| 1623327 at   | ---                     | 7.04  | 7.27  | 7.28  | 7.98  | 7     | 7.04  |
| 1626659 at   | FBgn0039558             | 8.36  | 8.59  | 8.72  | 9.12  | 8.54  | 8.64  |
| 1635747 at   | ---                     | 7.16  | 7.4   | 7.17  | 7.28  | 7.28  | 7.19  |
| 1626841 s at | FBgn0000317             | 9.27  | 9.51  | 9.3   | 9.13  | 9.21  | 9.54  |
| 1639047 at   | FBgn0043884             | 9.75  | 9.99  | 9.91  | 9.73  | 9.85  | 10.46 |
| 1638122 a at | FBgn0031395             | 7.07  | 7.31  | 6.7   | 6.93  | 7.24  | 7.45  |
| 1623031 a at | FBgn0040290             | 8.42  | 8.65  | 8.59  | 8.77  | 8.76  | 8.64  |
| 1638286 at   | FBgn0005683             | 8.66  | 8.9   | 8.59  | 8.83  | 8.98  | 9.06  |
| 1636625 at   | FBgn0034098             | 9.69  | 9.92  | 9.64  | 9.91  | 9.8   | 10.02 |
| 1624673 at   | FBgn0032157             | 8.36  | 8.59  | 8.72  | 8.97  | 8.76  | 8.71  |
| 1640424 at   | FBgn0037535             | 8.85  | 9.09  | 8.52  | 8.68  | 9.01  | 9.18  |
| AFFX-r2-Bs-c | ---                     | 7.46  | 7.69  | 7.79  | 8.26  | 7.49  | 7.4   |
| 1630369 a at | FBgn0029867             | 10.24 | 10.47 | 10.39 | 10.6  | 10.51 | 10.55 |



|              |                         |       |       |       |       |       |       |
|--------------|-------------------------|-------|-------|-------|-------|-------|-------|
| 1623403 s at | FBgn0015024             | 10.6  | 10.83 | 11.05 | 10.94 | 10.69 | 11.1  |
| 1624320 at   | FBgn0002707             | 6.91  | 7.14  | 7.16  | 7.23  | 7.4   | 7.43  |
| 1639825 at   | ---                     | 8.59  | 8.82  | 8.18  | 9.63  | 6.48  | 7.42  |
| 1635713 at   | FBgn0033661             | 8.9   | 9.13  | 9.33  | 8.68  | 8.88  | 9.2   |
| 1637264 at   | FBgn0002924             | 8.85  | 9.08  | 9.07  | 9.28  | 9.16  | 9.09  |
| 1640131 a at | FBgn0037897             | 8.62  | 8.85  | 8.63  | 8.59  | 8.67  | 8.71  |
| 1636673 s at | FBgn0003870             | 7.95  | 8.18  | 8.44  | 7.88  | 7.62  | 8.21  |
| 1638167 at   | FBgn0035155             | 8.57  | 8.8   | 8.3   | 8.35  | 8.3   | 8.67  |
| 1625813 at   | FBgn0026573             | 7.12  | 7.35  | 6.97  | 7.22  | 7.02  | 7.12  |
| 1623830 at   | FBgn0033890             | 8.89  | 9.12  | 8.98  | 9.33  | 9.29  | 9.22  |
| 1629794 at   | FBgn0031872             | 8.39  | 8.62  | 8.14  | 8.69  | 8.55  | 8.78  |
| 1639587 s at | FBgn0037144             | 8.56  | 8.79  | 8.51  | 8.76  | 8.91  | 8.87  |
| 1638763 at   | FBgn0052030             | 7.27  | 7.5   | 7.61  | 7.84  | 7.55  | 7.61  |
| 1637160 at   | FBgn0036908             | 9.95  | 10.18 | 10.19 | 10.16 | 10.12 | 10.22 |
| 1628382 at   | FBgn0024285             | 9.49  | 9.72  | 9.94  | 10.09 | 9.76  | 9.82  |
| 1637226 at   | ---                     | 9.31  | 9.53  | 9.77  | 9.9   | 9.46  | 9.49  |
| 1633294 at   | FBgn0034931             | 7.67  | 7.9   | 6.82  | 7.41  | 6.53  | 7.15  |
| 1633293 at   | FBgn0039099             | 9.7   | 9.93  | 9.97  | 9.94  | 9.63  | 9.7   |
| 1625500 at   | FBgn0033273 /// FBgn001 | 7.66  | 7.89  | 7.86  | 8.13  | 7.9   | 7.92  |
| 1628721 at   | FBgn0034490             | 8.67  | 8.89  | 8.8   | 8.09  | 8.17  | 8.74  |
| 1639182 at   | FBgn0039920             | 7.69  | 7.92  | 7.56  | 7.63  | 7.16  | 7.25  |
| 1631899 a at | FBgn0039145             | 8.83  | 9.06  | 9.14  | 9.29  | 9.07  | 9.15  |
| 1630514 at   | ---                     | 9.04  | 9.26  | 9.04  | 9.35  | 9.11  | 9.34  |
| 1640265 a at | FBgn0000032             | 10.14 | 10.37 | 10.26 | 10.32 | 10.54 | 10.52 |
| 1623357 at   | FBgn0035752             | 7.22  | 7.45  | 7.45  | 7.23  | 7.21  | 7.18  |
| 1637473 s at | FBgn0042125             | 8.38  | 8.61  | 8.3   | 8.58  | 8.71  | 8.79  |
| 1623264 at   | FBgn0034854             | 8.61  | 8.84  | 8.57  | 8.42  | 8.68  | 8.79  |
| 1637163 at   | FBgn0036486             | 9.42  | 9.65  | 9.44  | 10.28 | 9.76  | 9.74  |
| 1639419 at   | ---                     | 11.44 | 11.67 | 11.46 | 11.36 | 11.29 | 11.46 |
| 1638294 at   | FBgn0035843             | 8     | 8.23  | 8.13  | 8.31  | 8.28  | 8.22  |
| 1636471 at   | FBgn0002781             | 7.49  | 7.72  | 7.73  | 7.58  | 7.33  | 7.64  |
| 1628809 at   | FBgn0022699             | 7.31  | 7.53  | 7.69  | 7.92  | 7.87  | 7.62  |
| 1628896 a at | ---                     | 8.81  | 9.03  | 8.75  | 8.9   | 9.26  | 9.28  |
| 1634563 at   | FBgn0036684             | 8.84  | 9.06  | 8.85  | 9.14  | 8.83  | 8.95  |
| 1625427 at   | FBgn0038304             | 8.18  | 8.4   | 8.39  | 8.52  | 8.33  | 8.4   |
| 1630269 s at | ---                     | 8.26  | 8.49  | 8.56  | 8.6   | 8.48  | 8.6   |

|              |                         |       |       |       |       |       |       |
|--------------|-------------------------|-------|-------|-------|-------|-------|-------|
| 1636774 at   | FBgn0024698             | 8.91  | 9.13  | 8.96  | 8.89  | 8.89  | 9.01  |
| 1636732 at   | FBgn0030316             | 7.68  | 7.9   | 7.77  | 7.85  | 8.01  | 7.94  |
| 1632732 at   | FBgn0030242             | 9.84  | 10.06 | 9.56  | 9.88  | 9.96  | 10.06 |
| 1634906 at   | FBgn0003721 /// FBgn000 | 9.71  | 9.93  | 9.84  | 9.98  | 9.56  | 9.85  |
| 1640870 s at | FBgn0027070             | 9.23  | 9.45  | 8.17  | 9.47  | 9.4   | 9.37  |
| 1639133 at   | FBgn0037469             | 9.17  | 9.39  | 8.92  | 9.23  | 9.26  | 9.49  |
| 1627823 at   | ---                     | 9.06  | 9.29  | 9.38  | 9.38  | 9.15  | 9.43  |
| 1625564 at   | FBgn0037574             | 8.42  | 8.65  | 8.2   | 8.39  | 8.62  | 8.86  |
| 1629180 at   | FBgn0027791             | 9.32  | 9.54  | 9.3   | 9.49  | 9.28  | 9.48  |
| 1637691 at   | FBgn0037844             | 10.92 | 11.14 | 10.82 | 11.11 | 11.3  | 11.35 |
| 1639388 a at | FBgn0039958             | 10.35 | 10.57 | 10.41 | 10.6  | 10.46 | 10.4  |
| 1631407 a at | FBgn0029879             | 8.61  | 8.84  | 8.76  | 9.13  | 8.71  | 8.88  |
| 1622930 a at | FBgn0027873             | 8.34  | 8.56  | 8.56  | 8.63  | 8.54  | 8.54  |
| 1635321 at   | FBgn0037819             | 8.91  | 9.14  | 9.51  | 8.83  | 8.95  | 9.05  |
| 1633814 at   | FBgn0029866             | 8.53  | 8.75  | 8.64  | 8.74  | 8.16  | 8.26  |
| 1624994 at   | FBgn0000996             | 10.61 | 10.83 | 10.79 | 10.93 | 10.77 | 10.8  |
| 1632119 s at | FBgn0015788             | 10.73 | 10.95 | 10.88 | 10.77 | 10.6  | 10.89 |
| 1629515 at   | FBgn0017558             | 9.63  | 9.85  | 9.6   | 9.48  | 9.66  | 9.65  |
| 1638729 at   | FBgn0033921             | 8.78  | 9.01  | 8.92  | 9.14  | 9.09  | 9.15  |
| 1640133 at   | FBgn0039860             | 8.21  | 8.43  | 8.03  | 8.47  | 8.41  | 8.53  |
| 1636034 at   | FBgn0020306             | 10.13 | 10.35 | 10.22 | 10.07 | 9.75  | 10.08 |
| 1630997 at   | FBgn0031979             | 7.75  | 7.97  | 8.2   | 8.45  | 7.98  | 8.05  |
| 1633515 s at | FBgn0041171             | 9.79  | 10.01 | 10.17 | 10.05 | 9.98  | 10.17 |
| 1623643 s at | FBgn0020414             | 7.68  | 7.9   | 7.88  | 7.66  | 7.16  | 7.46  |
| 1629777 at   | FBgn0038166             | 9.52  | 9.74  | 9.44  | 9.53  | 9.62  | 9.66  |
| 1628429 at   | FBgn0031049             | 11.72 | 11.94 | 11.76 | 11.7  | 11.77 | 11.98 |
| 1630358 at   | FBgn0035388             | 9.21  | 9.43  | 9.42  | 9.23  | 9.35  | 9.66  |
| 1635225 at   | FBgn0032759             | 7.4   | 7.62  | 7.59  | 7.98  | 7.52  | 7.58  |
| 1628560 at   | ---                     | 10    | 10.22 | 10.22 | 10.39 | 10.26 | 10.25 |
| 1634334 at   | FBgn0038927             | 8.52  | 8.74  | 8.62  | 8.74  | 8.67  | 8.65  |
| 1631675 a at | FBgn0019948             | 9.03  | 9.25  | 9.1   | 9.08  | 9.11  | 9.26  |
| 1624613 at   | ---                     | 9.49  | 9.71  | 9.68  | 9.43  | 9.37  | 9.65  |
| 1634303 at   | FBgn0034453             | 9.61  | 9.82  | 9.81  | 10.01 | 9.86  | 9.99  |
| 1630918 at   | ---                     | 8.09  | 8.31  | 8.01  | 8.19  | 8.33  | 8.24  |
| 1632602 s at | FBgn0026611             | 9.55  | 9.77  | 9.61  | 9.73  | 9.46  | 9.64  |
| 1629820 at   | FBgn0036771             | 7.48  | 7.7   | 7.47  | 7.78  | 7.81  | 7.81  |

|              |                         |       |       |       |       |       |       |
|--------------|-------------------------|-------|-------|-------|-------|-------|-------|
| 1640159 at   | FBgn0040369             | 7.62  | 7.83  | 7.64  | 7.61  | 7.11  | 7.69  |
| 1628667 at   | FBgn0037877             | 7.42  | 7.64  | 7.8   | 7.92  | 7.68  | 7.78  |
| 1632316 at   | FBgn0033883             | 9.3   | 9.52  | 9.38  | 9.38  | 9.27  | 9.49  |
| 1627538 at   | FBgn0032400             | 13.03 | 13.25 | 12.85 | 12.95 | 13.07 | 13.25 |
| 1639790 at   | FBgn0038536             | 7.5   | 7.72  | 7.64  | 7.83  | 7.82  | 7.81  |
| 1636106 s at | FBgn0038535             | 9.84  | 10.06 | 10.16 | 10.25 | 9.82  | 10.09 |
| 1623460 at   | ---                     | 8.55  | 8.76  | 8.75  | 9.01  | 8.82  | 8.79  |
| 1634524 s at | FBgn0036955             | 8.97  | 9.18  | 9     | 9.2   | 9.07  | 9.16  |
| 1632043 a at | ---                     | 8.14  | 8.36  | 8.22  | 8.4   | 8.4   | 8.29  |
| 1626506 at   | FBgn0039212             | 9.11  | 9.33  | 9.2   | 9.29  | 9.03  | 9.21  |
| 1625841 at   | FBgn0035537             | 7.84  | 8.06  | 7.77  | 8.5   | 8.01  | 8.08  |
| 1636332 at   | FBgn0003721 /// FBgn000 | 10.92 | 11.13 | 11.32 | 10.45 | 10.44 | 11.11 |
| 1634112 a at | FBgn0034345             | 11.13 | 11.35 | 11.28 | 11.34 | 11.12 | 11.29 |
| 1623644 s at | FBgn0015521             | 13.92 | 14.13 | 14.14 | 14.14 | 14.06 | 14.11 |
| 1641554 at   | FBgn0033539             | 8.65  | 8.87  | 8.51  | 8.51  | 8.77  | 8.84  |
| 1638409 at   | FBgn0035147             | 8.65  | 8.86  | 8.89  | 8.2   | 8.16  | 8.67  |
| 1628512 at   | FBgn0036763             | 7.51  | 7.73  | 7.85  | 8.08  | 7.84  | 7.91  |
| 1629889 s at | FBgn0030362             | 8.16  | 8.37  | 9.19  | 8.88  | 8.84  | 8.89  |
| 1640364 at   | FBgn0015776             | 11.23 | 11.45 | 11.4  | 11.4  | 11.32 | 11.56 |
| 1631304 a at | FBgn0033401             | 8.49  | 8.71  | 8.66  | 8.92  | 8.63  | 8.6   |
| 1626945 at   | FBgn0032005             | 10.29 | 10.51 | 10.44 | 10.67 | 10.45 | 10.54 |
| 1633473 s at | FBgn0000064             | 7.66  | 7.88  | 8.27  | 7.54  | 7.64  | 7.4   |
| 1624077 at   | FBgn0032031             | 7.44  | 7.66  | 7.64  | 7.64  | 7.57  | 7.69  |
| 1634922 s at | FBgn0040384             | 8.46  | 8.67  | 8.64  | 8.71  | 8.68  | 8.73  |
| 1627812 s at | FBgn0010252             | 10.61 | 10.83 | 10.68 | 10.96 | 10.71 | 10.99 |
| 1636775 at   | ---                     | 7.02  | 7.23  | 7.54  | 6.96  | 6.57  | 6.92  |
| 1631190 at   | FBgn0033993             | 6.59  | 6.81  | 6.42  | 7.23  | 7.1   | 7.17  |
| 1629159 at   | FBgn0028919             | 8.52  | 8.74  | 8.46  | 8.93  | 8.59  | 8.72  |
| 1635538 at   | FBgn0033259             | 8.01  | 8.22  | 8.14  | 8.18  | 8.19  | 8.22  |
| 1624188 at   | FBgn0051392             | 7.16  | 7.37  | 7.01  | 7.42  | 7.46  | 7.35  |
| 1631745 at   | FBgn0032398             | 9.75  | 9.96  | 10.09 | 10.07 | 9.91  | 10.05 |
| 1626115 at   | FBgn0037540             | 7.97  | 8.18  | 7.65  | 7.87  | 8.04  | 8.19  |
| 1635643 at   | FBgn0037364             | 9.33  | 9.54  | 9.57  | 9.86  | 9.66  | 9.62  |
| 1636267 at   | FBgn0035209             | 10.12 | 10.34 | 9.89  | 10.3  | 9.76  | 9.73  |
| 1630523 at   | FBgn0030100             | 8.29  | 8.5   | 7.76  | 8.04  | 8.64  | 8.7   |
| 1640979 at   | FBgn0030484             | 8.25  | 8.46  | 9.01  | 9.37  | 8.54  | 8.17  |

|              |             |       |       |       |       |       |       |
|--------------|-------------|-------|-------|-------|-------|-------|-------|
| 1632917 at   | FBgn0039258 | 9.44  | 9.65  | 9.43  | 9.7   | 9.35  | 9.5   |
| 1631688 at   | FBgn0002641 | 9.01  | 9.22  | 8.92  | 9.32  | 8.99  | 9.01  |
| 1641023 at   | FBgn0031006 | 8.36  | 8.58  | 8.69  | 8.72  | 8.58  | 8.71  |
| 1627764 at   | FBgn0038325 | 9.02  | 9.23  | 9.06  | 9.11  | 9.01  | 9.15  |
| 1631263 at   | FBgn0034600 | 9.03  | 9.24  | 9.32  | 9.71  | 9.2   | 9.29  |
| 1625358 s at | FBgn0032885 | 7.54  | 7.75  | 7.16  | 8.01  | 7.91  | 7.73  |
| 1623347 at   | FBgn0030551 | 12.32 | 12.53 | 12.16 | 12.46 | 12.42 | 12.44 |
| 1632916 at   | ---         | 8.28  | 8.49  | 8.34  | 8.47  | 8.61  | 8.52  |
| 1639111 at   | FBgn0031378 | 8.87  | 9.08  | 8.97  | 9.44  | 9.11  | 9.29  |
| 1624427 at   | FBgn0036292 | 8.22  | 8.43  | 8.22  | 8.43  | 8.53  | 8.5   |
| 1623102 at   | ---         | 10.47 | 10.68 | 9.99  | 10.29 | 10.44 | 10.43 |
| 1636912 at   | FBgn0033616 | 9.12  | 9.33  | 9.13  | 9.34  | 9.31  | 9.45  |
| 1624847 at   | FBgn0040534 | 9.56  | 9.77  | 9.74  | 9.86  | 9.68  | 9.84  |
| 1622906 at   | FBgn0033630 | 8.8   | 9.01  | 8.57  | 7.4   | 8.39  | 9.02  |
| 1634191 at   | FBgn0030870 | 10.38 | 10.58 | 10.28 | 10.28 | 10.22 | 10.34 |
| 1624935 at   | FBgn0037578 | 9.09  | 9.3   | 9.03  | 9.39  | 9     | 9.12  |
| 1639409 at   | FBgn0038590 | 6.98  | 7.19  | 7.31  | 7.53  | 7.06  | 7.16  |
| 1641316 at   | FBgn0041147 | 7.55  | 7.76  | 7.66  | 7.64  | 7.63  | 7.72  |
| 1635811 at   | FBgn0003302 | 8.84  | 9.05  | 8.63  | 8.61  | 8.78  | 9.05  |
| 1633778 at   | FBgn0039487 | 8.94  | 9.14  | 9.32  | 9.24  | 8.88  | 9.23  |
| 1623122 at   | FBgn0032032 | 7.89  | 8.1   | 7.89  | 8.12  | 7.92  | 8.04  |
| 1628493 at   | ---         | 7.41  | 7.62  | 7.51  | 7.11  | 7.17  | 7.87  |
| 1630112 at   | FBgn0042213 | 7.89  | 8.09  | 8.29  | 8.25  | 8.03  | 8.2   |
| 1639975 at   | FBgn0037713 | 7.42  | 7.63  | 7.13  | 7.92  | 7.3   | 7.49  |
| 1634604 at   | FBgn0004643 | 9.67  | 9.88  | 9.67  | 10.08 | 9.89  | 9.86  |
| 1631309 at   | FBgn0030966 | 7.58  | 7.79  | 7.85  | 8.11  | 7.85  | 7.94  |
| 1637329 a at | ---         | 8.42  | 8.63  | 8.58  | 8.74  | 8.61  | 8.59  |
| 1629545 at   | FBgn0004045 | 13.11 | 13.31 | 13.18 | 12.6  | 12.62 | 13.36 |
| 1638738 s at | FBgn0029092 | 11.34 | 11.55 | 11.4  | 11.61 | 11.22 | 11.52 |
| 1624463 s at | ---         | 8.25  | 8.46  | 8.22  | 8.54  | 8.05  | 8.41  |
| 1636337 s at | FBgn0035375 | 8.71  | 8.92  | 9.04  | 8.96  | 8.72  | 9.03  |
| 1628377 s at | FBgn0024832 | 9.74  | 9.94  | 9.87  | 10.04 | 9.75  | 9.88  |
| 1625679 at   | FBgn0040715 | 9.37  | 9.58  | 9.75  | 9.85  | 9.44  | 9.61  |
| 1635329 at   | FBgn0036133 | 9.96  | 10.17 | 9.88  | 9.95  | 9.99  | 10.15 |
| 1641048 a at | FBgn0015600 | 9.25  | 9.46  | 9.34  | 9.16  | 9.22  | 9.55  |
| 1633129 at   | FBgn0038583 | 7.85  | 8.06  | 7.92  | 8     | 7.83  | 7.95  |

|              |             |       |       |       |       |       |       |
|--------------|-------------|-------|-------|-------|-------|-------|-------|
| 1636872 at   | FBgn0020766 | 8.72  | 8.92  | 8.71  | 8.78  | 8.55  | 8.66  |
| 1625024 at   | FBgn0061476 | 8.88  | 9.09  | 9.04  | 9.44  | 9.3   | 9.4   |
| 1640198 at   | FBgn0037082 | 8.11  | 8.32  | 8.03  | 8.28  | 8.49  | 8.44  |
| 1628530 at   | FBgn0037045 | 9.01  | 9.21  | 8.68  | 8.94  | 8.97  | 8.97  |
| 1624122 a at | FBgn0014015 | 8.52  | 8.72  | 8.49  | 8.44  | 8.57  | 8.93  |
| 1638031 at   | FBgn0039639 | 7.2   | 7.4   | 7.42  | 7.34  | 7.38  | 7.42  |
| 1636295 at   | FBgn0034177 | 7.16  | 7.36  | 7.27  | 7.45  | 7.18  | 7.4   |
| 1633333 a at | FBgn0031968 | 8.16  | 8.36  | 7.7   | 8.11  | 7.94  | 7.79  |
| 1631674 at   | ---         | 9.48  | 9.69  | 9.8   | 9.45  | 9.49  | 9.72  |
| 1624658 at   | FBgn0053158 | 7.49  | 7.69  | 7.67  | 7.74  | 7.65  | 7.42  |
| 1638020 at   | FBgn0035679 | 7.8   | 8     | 8.12  | 8.25  | 7.83  | 7.82  |
| 1627953 at   | FBgn0002781 | 7.97  | 8.18  | 8.01  | 8.3   | 8.05  | 8.19  |
| 1634161 at   | FBgn0032389 | 7.79  | 8     | 8.05  | 8.21  | 8.46  | 8.57  |
| 1627640 at   | FBgn0035105 | 9.31  | 9.51  | 9.18  | 9.24  | 9.31  | 9.47  |
| 1632184 at   | FBgn0032204 | 8.55  | 8.76  | 8.44  | 8.87  | 8.86  | 8.92  |
| 1635177 at   | ---         | 10.84 | 11.05 | 10.89 | 11.05 | 10.97 | 10.96 |
| 1623826 at   | FBgn0027052 | 9.76  | 9.97  | 9.69  | 9.85  | 9.9   | 10.13 |
| 1631273 at   | FBgn0036988 | 8.49  | 8.69  | 8.15  | 8.26  | 8.52  | 8.62  |
| 1629325 at   | ---         | 8.96  | 9.16  | 8.92  | 8.72  | 9.17  | 9.39  |
| 1632187 at   | FBgn0034184 | 7.89  | 8.09  | 8.01  | 8.35  | 7.94  | 7.89  |
| 1632652 s at | FBgn0050022 | 7.71  | 7.91  | 7.97  | 7.87  | 7.77  | 7.89  |
| 1640177 at   | FBgn0038772 | 10.17 | 10.37 | 10.29 | 10.49 | 10.45 | 10.57 |
| 1639310 at   | FBgn0030963 | 9.14  | 9.35  | 9.11  | 9.89  | 9.54  | 9.44  |
| 1626997 at   | FBgn0039449 | 8.06  | 8.26  | 7.95  | 8.17  | 8.48  | 8.48  |
| 1626224 s at | FBgn0024689 | 8.37  | 8.57  | 8.54  | 8.68  | 8.37  | 8.54  |
| 1631712 at   | FBgn0032042 | 8.89  | 9.09  | 8.76  | 8.96  | 9.03  | 9.29  |
| 1633801 s at | FBgn0031738 | 7.43  | 7.63  | 7.61  | 7.85  | 7.41  | 7.54  |
| 1640653 at   | FBgn0040057 | 8.64  | 8.85  | 9.21  | 8.96  | 9.28  | 9.52  |
| 1636245 at   | ---         | 7.39  | 7.6   | 7.73  | 7.47  | 7.53  | 7.66  |
| 1631466 at   | FBgn0039601 | 8.84  | 9.04  | 9.02  | 9.08  | 8.96  | 8.89  |
| 1632928 at   | FBgn0031812 | 9.24  | 9.44  | 8.96  | 9.41  | 9.4   | 9.52  |
| 1629796 s at | FBgn0000316 | 9.95  | 10.15 | 9.96  | 10.29 | 10.04 | 10.01 |
| 1626082 at   | FBgn0039642 | 8.16  | 8.37  | 8.48  | 8.33  | 8.31  | 8.5   |
| 1629036 at   | ---         | 8.33  | 8.53  | 8.24  | 8.65  | 8.73  | 8.76  |
| 1636847 s at | FBgn0029152 | 9.8   | 10    | 9.95  | 10.17 | 9.81  | 10.09 |
| 1625519 at   | FBgn0032643 | 9.65  | 9.85  | 9.79  | 9.88  | 9.71  | 9.89  |

|              |             |       |       |       |       |       |       |
|--------------|-------------|-------|-------|-------|-------|-------|-------|
| 1625185 at   | FBgn0036261 | 7.67  | 7.87  | 7.47  | 7.6   | 7.68  | 8.01  |
| 1639253 at   | FBgn0034451 | 10.32 | 10.52 | 10.34 | 10.6  | 10.3  | 10.52 |
| 1638544 at   | FBgn0033429 | 8.18  | 8.38  | 8.36  | 8.28  | 8.08  | 8.24  |
| 1637166 at   | ---         | 9.39  | 9.59  | 9.47  | 9.85  | 9.44  | 9.66  |
| 1639608 at   | FBgn0031091 | 10.37 | 10.57 | 10.43 | 10.56 | 10.8  | 10.79 |
| 1628204 at   | FBgn0035703 | 7.07  | 7.27  | 7.3   | 7.39  | 7.32  | 7.33  |
| 1625833 at   | FBgn0034808 | 9.03  | 9.23  | 8.88  | 8.84  | 9     | 9.26  |
| AFFX-Dros-C  | FBgn0001092 | 12.01 | 12.2  | 12.19 | 12.32 | 12.41 | 12.41 |
| 1626561 at   | FBgn0036714 | 7.81  | 8.01  | 7.99  | 8.15  | 8.04  | 8     |
| 1627885 s at | FBgn0036483 | 9.1   | 9.3   | 8.95  | 9.08  | 9     | 9.19  |
| 1635842 at   | FBgn0036448 | 9.47  | 9.66  | 9.86  | 9.93  | 9.55  | 9.65  |
| 1626918 at   | FBgn0035120 | 9.15  | 9.35  | 9.42  | 9.77  | 9.3   | 9.4   |
| 1640960 at   | FBgn0039773 | 6.83  | 7.03  | 6.91  | 7.14  | 7.15  | 7.05  |
| 1624240 at   | FBgn0010288 | 11.17 | 11.37 | 11.35 | 11.59 | 11.39 | 11.37 |
| 1623655 at   | FBgn0005391 | 13.31 | 13.51 | 13.47 | 12.74 | 12.81 | 13.6  |
| 1635654 at   | FBgn0030678 | 8.24  | 8.44  | 8.22  | 8.25  | 8.19  | 8.34  |
| 1628106 at   | FBgn0035421 | 9.86  | 10.06 | 9.82  | 9.8   | 9.92  | 10.03 |
| 1631971 at   | FBgn0036207 | 7.71  | 7.91  | 8.23  | 8.46  | 8.26  | 8.34  |
| 1634031 at   | FBgn0035696 | 9.54  | 9.74  | 9.95  | 9.54  | 8.8   | 9.54  |
| 1630397 at   | FBgn0039210 | 8.64  | 8.84  | 8.43  | 8.75  | 8.7   | 8.73  |
| 1635305 s at | FBgn0013263 | 7.26  | 7.46  | 7.68  | 7.6   | 7.32  | 7.69  |
| 1636257 at   | FBgn0036300 | 8.74  | 8.94  | 8.88  | 9.04  | 8.64  | 8.78  |
| 1637523 at   | FBgn0029970 | 7.86  | 8.06  | 7.82  | 8.31  | 7.94  | 7.83  |
| 1627894 s at | FBgn0013764 | 9.57  | 9.77  | 9.02  | 9.61  | 9.68  | 9.69  |
| 1629305 at   | FBgn0010660 | 8.48  | 8.68  | 8.61  | 8.56  | 8.56  | 8.6   |
| 1632240 at   | FBgn0040347 | 9.3   | 9.5   | 9.14  | 9.57  | 9.46  | 9.51  |
| 1624778 at   | FBgn0020261 | 9.33  | 9.53  | 9.76  | 9.7   | 9.39  | 9.36  |
| 1624160 at   | FBgn0031848 | 8.55  | 8.75  | 8.49  | 8.93  | 8.71  | 8.73  |
| 1624541 at   | FBgn0031118 | 8.5   | 8.7   | 8.68  | 8.38  | 8.35  | 8.74  |
| 1634771 a at | FBgn0030674 | 8.25  | 8.45  | 8.96  | 8.9   | 8.37  | 8.38  |
| 1637189 at   | FBgn0038593 | 7.6   | 7.8   | 7.66  | 7.96  | 7.77  | 7.83  |
| 1634230 s at | FBgn0011598 | 12.41 | 12.61 | 12.44 | 12.6  | 12.27 | 12.54 |
| 1624263 at   | FBgn0039139 | 7.29  | 7.49  | 7.54  | 8     | 7.72  | 7.53  |
| 1631385 at   | FBgn0030206 | 7.1   | 7.29  | 7.09  | 7.3   | 7.42  | 7.37  |
| 1632717 a at | FBgn0031315 | 8.47  | 8.67  | 8.9   | 8.88  | 8.6   | 8.66  |
| 1628627 at   | FBgn0033996 | 9.27  | 9.46  | 9.27  | 9.36  | 9.47  | 9.56  |

|              |             |       |       |       |       |       |       |
|--------------|-------------|-------|-------|-------|-------|-------|-------|
| 1631515 at   | FBgn0039636 | 8.54  | 8.74  | 8.45  | 8.71  | 8.55  | 8.57  |
| 1624513 at   | FBgn0035048 | 7.61  | 7.8   | 8.11  | 7.99  | 7.83  | 7.78  |
| 1630857 s at | FBgn0024947 | 10.9  | 11.09 | 10.87 | 10.84 | 10.76 | 10.95 |
| 1629319 at   | FBgn0032724 | 9.13  | 9.33  | 9.16  | 9.21  | 9.14  | 9.29  |
| 1637092 a at | FBgn0034923 | 7.73  | 7.92  | 8.18  | 7.94  | 8.01  | 8.06  |
| 1629964 at   | FBgn0036812 | 8.69  | 8.89  | 8.86  | 8.95  | 9     | 9.02  |
| 1639690 a at | FBgn0016754 | 7.08  | 7.28  | 7.12  | 7.16  | 7.28  | 7.48  |
| 1628019 a at | FBgn0039141 | 7.5   | 7.69  | 7.78  | 7.77  | 7.73  | 7.69  |
| AFFX-Dros-1  | ---         | 11.43 | 11.63 | 11.49 | 11.85 | 11.5  | 11.82 |
| 1640470 s at | ---         | 10.27 | 10.47 | 10.66 | 10.59 | 10.44 | 10.53 |
| 1626355 at   | FBgn0020756 | 8.21  | 8.4   | 8.42  | 8.33  | 8.44  | 8.36  |
| 1640341 s at | FBgn0027836 | 9     | 9.19  | 9.35  | 9.71  | 9.49  | 9.43  |
| 1630451 at   | ---         | 8.68  | 8.87  | 8.82  | 8.8   | 8.72  | 8.74  |
| 1627651 a at | FBgn0020278 | 9.1   | 9.3   | 9.13  | 8.96  | 9.23  | 9.43  |
| 1640001 at   | ---         | 8.99  | 9.18  | 9.32  | 9.18  | 9.05  | 9.17  |
| 1623177 at   | ---         | 9.01  | 9.2   | 8.93  | 8.89  | 9.01  | 9.16  |
| 1637671 a at | FBgn0040777 | 10.4  | 10.6  | 10.64 | 10.48 | 10.47 | 10.61 |
| 1626175 at   | ---         | 8.54  | 8.73  | 8.57  | 8.78  | 8.71  | 8.67  |
| 1633458 at   | FBgn0003655 | 11.02 | 11.22 | 10.97 | 11.23 | 11.1  | 11.19 |
| 1623375 at   | FBgn0036480 | 7.16  | 7.35  | 7.36  | 7.82  | 7.42  | 7.41  |
| 1630991 at   | FBgn0034455 | 10.31 | 10.5  | 10.25 | 10.62 | 10.33 | 10.45 |
| 1632747 at   | FBgn0030507 | 9.05  | 9.24  | 9.06  | 9.57  | 9.23  | 9.25  |
| 1632222 a at | FBgn0036428 | 10.97 | 11.17 | 10.98 | 11.14 | 10.94 | 11.17 |
| 1641198 at   | FBgn0035294 | 7.84  | 8.03  | 7.89  | 7.93  | 7.93  | 8.12  |
| 1632680 at   | FBgn0001970 | 8.48  | 8.67  | 8.48  | 9     | 8.41  | 8.37  |
| 1626898 at   | FBgn0032348 | 9.11  | 9.31  | 9.13  | 9.39  | 9.23  | 9.13  |
| 1637174 s at | FBgn0053008 | 7.38  | 7.57  | 7.23  | 7.73  | 7.32  | 7.51  |
| 1629144 at   | FBgn0031607 | 7.75  | 7.95  | 7.89  | 8.16  | 8.03  | 7.94  |
| 1628932 at   | FBgn0002781 | 8.12  | 8.31  | 8.06  | 8.55  | 8.39  | 8.54  |
| 1630729 at   | ---         | 7.39  | 7.58  | 7.46  | 7.52  | 7.53  | 7.36  |
| 1629113 a at | ---         | 7.86  | 8.05  | 8.02  | 8.1   | 8     | 8.08  |
| 1632748 at   | FBgn0034402 | 7.53  | 7.72  | 7.67  | 7.96  | 7.69  | 7.7   |
| 1627580 at   | FBgn0039016 | 7.4   | 7.59  | 7.58  | 7.62  | 7.56  | 7.53  |
| 1634147 a at | ---         | 7.73  | 7.92  | 7.93  | 8.16  | 8.06  | 7.88  |
| 1632777 at   | FBgn0034033 | 7.85  | 8.04  | 8.17  | 7.93  | 8.07  | 8.16  |
| 1629019 s at | FBgn0040660 | 11.95 | 12.15 | 12.18 | 12.3  | 12.12 | 12.13 |

|              |             |       |       |       |       |       |       |
|--------------|-------------|-------|-------|-------|-------|-------|-------|
| 1632301 at   | FBgn0031818 | 9.24  | 9.43  | 9.12  | 9.19  | 9.35  | 9.46  |
| 1624375 at   | ---         | 9.79  | 9.98  | 9.56  | 9.81  | 9.75  | 10.08 |
| 1631183 at   | ---         | 7.02  | 7.21  | 7.49  | 6.74  | 6.7   | 7.24  |
| 1630124 at   | FBgn0039560 | 6.67  | 6.86  | 6.74  | 7.25  | 7.2   | 7.15  |
| 1629625 at   | FBgn0033613 | 8.87  | 9.06  | 9.47  | 9.19  | 9.02  | 9.24  |
| 1635487 at   | FBgn0038463 | 8.37  | 8.56  | 8.58  | 8.96  | 8.51  | 8.52  |
| 1625447 at   | FBgn0039680 | 8.71  | 8.9   | 8.85  | 9.37  | 8.86  | 8.83  |
| 1641178 s at | FBgn0035181 | 8.97  | 9.16  | 9.16  | 9.37  | 9.27  | 9.29  |
| 1634430 at   | FBgn0031186 | 8.85  | 9.04  | 8.91  | 9.08  | 8.87  | 9.19  |
| 1634714 at   | ---         | 8.36  | 8.55  | 8.56  | 8.62  | 8.58  | 8.59  |
| 1627930 s at | FBgn0052280 | 7.8   | 7.99  | 8.56  | 7.08  | 7.32  | 7.85  |
| 1632110 at   | FBgn0037711 | 7.81  | 8     | 7.81  | 8.09  | 8.13  | 8.1   |
| 1628550 a at | FBgn0033377 | 8.61  | 8.8   | 8.98  | 9.03  | 8.66  | 8.75  |
| 1639589 at   | FBgn0031398 | 8.32  | 8.5   | 8.2   | 8.39  | 8.34  | 8.34  |
| 1639264 at   | FBgn0015075 | 8.41  | 8.59  | 8.82  | 8.9   | 8.51  | 8.47  |
| 1633758 at   | FBgn0037848 | 8.14  | 8.33  | 7.81  | 7.97  | 8.12  | 8.18  |
| 1628660 at   | FBgn0037151 | 7.95  | 8.14  | 7.89  | 8.61  | 8.33  | 8.25  |
| 1626807 a at | FBgn0028703 | 7.61  | 7.8   | 7.68  | 7.97  | 7.42  | 7.88  |
| 1624537 s at | FBgn0031420 | 8.39  | 8.58  | 8.41  | 8.58  | 8.48  | 8.56  |
| 1637634 at   | FBgn0034204 | 8.42  | 8.61  | 8.37  | 8.24  | 8.32  | 8.59  |
| 1633665 at   | ---         | 9.2   | 9.39  | 9.2   | 9.54  | 9.43  | 9.47  |
| 1638200 at   | FBgn0003048 | 7.85  | 8.04  | 7.68  | 7.7   | 7.97  | 8.02  |
| 1633835 s at | FBgn0024991 | 9.79  | 9.97  | 9.77  | 9.89  | 9.7   | 9.82  |
| 1628271 at   | FBgn0031418 | 9.64  | 9.83  | 9.06  | 9.88  | 9.72  | 9.68  |
| 1623664 at   | FBgn0037044 | 8.23  | 8.42  | 8.41  | 8.39  | 8.53  | 8.45  |
| 1636040 at   | FBgn0034583 | 10.19 | 10.37 | 10.17 | 10.38 | 10.02 | 10.26 |
| 1631721 at   | FBgn0015025 | 6.98  | 7.17  | 6.96  | 7.31  | 7.35  | 7.15  |
| 1632099 s at | FBgn0046704 | 9.16  | 9.34  | 9.2   | 9.23  | 9.3   | 9.35  |
| 1635652 at   | FBgn0023458 | 8.64  | 8.82  | 8.81  | 8.69  | 8.62  | 8.64  |
| 1641168 s at | FBgn0032961 | 11.19 | 11.37 | 11.52 | 11.72 | 11.56 | 11.63 |
| 1632417 a at | FBgn0035944 | 10.39 | 10.57 | 10.43 | 10.67 | 10.47 | 10.58 |
| 1628825 at   | FBgn0033998 | 8.21  | 8.4   | 8.46  | 8.55  | 8.15  | 8.37  |
| 1629663 at   | FBgn0032979 | 10.25 | 10.43 | 10.33 | 10.54 | 10.41 | 10.57 |
| 1640361 at   | FBgn0030956 | 11.05 | 11.23 | 10.88 | 11.2  | 11.13 | 11.23 |
| 1635422 s at | FBgn0031774 | 7.61  | 7.79  | 7.52  | 7.96  | 8.08  | 8.04  |
| 1628601 at   | FBgn0004380 | 7.71  | 7.89  | 7.78  | 8.12  | 8.02  | 7.86  |



|              |             |       |       |       |       |       |       |
|--------------|-------------|-------|-------|-------|-------|-------|-------|
| 1637667 at   | FBgn0032034 | 9.23  | 9.41  | 9.28  | 9.57  | 9.31  | 9.44  |
| 1624535 at   | FBgn0035114 | 10.99 | 11.17 | 10.64 | 11.2  | 11.09 | 11.18 |
| 1623805 at   | FBgn0033352 | 8.21  | 8.39  | 8.01  | 8.11  | 8.14  | 8.4   |
| 1630657 at   | FBgn0028647 | 7.47  | 7.65  | 7.68  | 7.9   | 7.63  | 7.62  |
| 1634784 at   | FBgn0005596 | 8.71  | 8.89  | 8.84  | 8.85  | 8.85  | 8.93  |
| 1634942 at   | FBgn0036460 | 9.85  | 10.03 | 10.27 | 9.81  | 10.08 | 10.17 |
| 1641134 at   | FBgn0031713 | 8.7   | 8.89  | 8.77  | 8.96  | 8.87  | 8.82  |
| 1623798 at   | FBgn0039169 | 7.81  | 7.99  | 7.71  | 7.69  | 8.06  | 8.05  |
| 1625655 at   | FBgn0031436 | 9.6   | 9.78  | 10    | 9.95  | 9.73  | 9.8   |
| 1630024 at   | FBgn0035851 | 7.85  | 8.04  | 7.88  | 8.01  | 7.77  | 7.91  |
| 1640200 at   | FBgn0024242 | 9.24  | 9.42  | 9.18  | 8.8   | 8.95  | 9.29  |
| 1640660 at   | FBgn0015818 | 9.36  | 9.55  | 9.72  | 9.68  | 9.71  | 9.83  |
| 1626249 s at | FBgn0010382 | 10.24 | 10.42 | 9.9   | 10.24 | 10.27 | 10.58 |
| 1627865 a at | ---         | 7.26  | 7.44  | 7.79  | 7.26  | 6.91  | 7.44  |
| 1637437 at   | FBgn0037794 | 7.41  | 7.59  | 7.83  | 7.91  | 7.81  | 7.89  |
| 1630703 at   | FBgn0034181 | 11.33 | 11.52 | 11.49 | 11.52 | 11.36 | 11.46 |
| 1641444 a at | FBgn0040285 | 8.78  | 8.96  | 8.83  | 8.69  | 8.91  | 9.1   |
| 1629921 a at | FBgn0004837 | 8.87  | 9.05  | 8.68  | 8.94  | 8.81  | 9.07  |
| 1628655 at   | FBgn0035969 | 9.66  | 9.84  | 9.97  | 9.96  | 9.81  | 9.83  |
| 1627150 at   | FBgn0024987 | 9.54  | 9.73  | 9.82  | 9.76  | 9.62  | 9.92  |
| 1632640 at   | FBgn0038360 | 8.7   | 8.88  | 8.65  | 8.67  | 8.81  | 8.77  |
| 1630912 at   | FBgn0039698 | 8.44  | 8.63  | 8.44  | 8.49  | 8.4   | 8.51  |
| 1629851 at   | FBgn0051998 | 9.01  | 9.19  | 9.01  | 9.12  | 8.7   | 8.89  |
| 1626763 a at | FBgn0039269 | 10.42 | 10.6  | 10.42 | 10.71 | 10.72 | 10.74 |
| 1634543 at   | FBgn0030646 | 7.5   | 7.68  | 7.62  | 7.98  | 7.68  | 7.68  |
| 1623590 s at | FBgn0052438 | 8.56  | 8.74  | 8.78  | 9.02  | 8.81  | 8.76  |
| 1631278 a at | FBgn0033695 | 8.28  | 8.46  | 8.56  | 8.88  | 8.4   | 8.5   |
| 1623678 at   | FBgn0030692 | 9.29  | 9.47  | 9.83  | 9.94  | 9.38  | 9.45  |
| 1624277 at   | FBgn0037716 | 8.43  | 8.61  | 8.38  | 8.74  | 8.43  | 8.56  |
| 1631388 at   | ---         | 7.96  | 8.14  | 8.03  | 8.14  | 7.86  | 7.98  |
| 1635340 at   | FBgn0003891 | 9.45  | 9.63  | 9.85  | 9.65  | 9.51  | 9.75  |
| 1638315 s at | FBgn0033716 | 8.93  | 9.11  | 9.22  | 9.16  | 9.27  | 9.35  |
| 1637107 at   | FBgn0036052 | 8.34  | 8.52  | 8.41  | 8.45  | 8.29  | 8.53  |
| 1628463 at   | FBgn0040494 | 9.83  | 10.01 | 9.77  | 10.57 | 9.96  | 10.04 |
| 1641596 at   | FBgn0032751 | 6.99  | 7.17  | 6.92  | 6.85  | 7.04  | 7.19  |
| 1625544 s at | ---         | 7     | 7.17  | 7.04  | 6.98  | 7.6   | 7.5   |

|              |             |       |       |       |       |       |       |
|--------------|-------------|-------|-------|-------|-------|-------|-------|
| 1623902 at   | ---         | 10.22 | 10.4  | 10.52 | 10.32 | 10.25 | 10.41 |
| 1640830 at   | ---         | 10.26 | 10.44 | 10.31 | 10.58 | 10.56 | 10.6  |
| 1623506 s at | FBgn0023177 | 10.09 | 10.27 | 10.22 | 10.62 | 10.25 | 10.2  |
| 1632667 s at | FBgn0001092 | 12.82 | 13    | 13.01 | 13.2  | 13.1  | 13.15 |
| 1639341 at   | FBgn0035449 | 9.55  | 9.73  | 9.34  | 9.46  | 9.41  | 9.67  |
| 1638722 at   | FBgn0036621 | 7.96  | 8.14  | 7.82  | 7.88  | 7.94  | 8.2   |
| 1636533 at   | FBgn0034217 | 6.9   | 7.08  | 7.15  | 7.66  | 7.35  | 7.59  |
| 1631460 s at | FBgn0035047 | 9.64  | 9.81  | 9.22  | 9.73  | 9.72  | 9.83  |
| 1639051 at   | FBgn0033554 | 8.28  | 8.45  | 8.37  | 8.58  | 8.15  | 8.4   |
| 1627090 at   | FBgn0023180 | 8.52  | 8.7   | 8.58  | 8.58  | 8.58  | 8.51  |
| 1626888 at   | FBgn0032485 | 9.62  | 9.8   | 9.71  | 9.76  | 9.7   | 10.07 |
| 1639280 at   | FBgn0036733 | 8.53  | 8.71  | 8.88  | 9.54  | 8.87  | 8.8   |
| 1636363 s at | FBgn0034282 | 10.17 | 10.35 | 10.39 | 10.92 | 10.48 | 10.44 |
| 1633355 at   | FBgn0029664 | 8.02  | 8.2   | 8.7   | 9.24  | 8.29  | 8.29  |
| 1633573 a at | ---         | 7.83  | 8     | 7.91  | 7.64  | 7.9   | 7.84  |
| 1625271 at   | FBgn0025684 | 8.46  | 8.63  | 8.18  | 8.34  | 8.41  | 8.52  |
| 1626840 a at | FBgn0033914 | 9.41  | 9.59  | 9.73  | 9.66  | 9.6   | 9.62  |
| 1633845 at   | FBgn0029858 | 8.33  | 8.51  | 8.23  | 8.64  | 8.25  | 8.31  |
| 1636164 s at | FBgn0033005 | 10.7  | 10.87 | 10.99 | 11.01 | 10.94 | 11.04 |
| 1634078 at   | FBgn0039631 | 8.01  | 8.19  | 7.89  | 8.25  | 8.26  | 8.24  |
| 1630835 a at | FBgn0034002 | 7.54  | 7.72  | 7.35  | 7.71  | 7.48  | 7.52  |
| 1631875 at   | FBgn0037321 | 8.63  | 8.8   | 8.54  | 8.87  | 8.86  | 9.12  |
| 1623688 at   | FBgn0037027 | 8.73  | 8.9   | 8.84  | 9.17  | 8.91  | 8.88  |
| 1624190 at   | FBgn0051637 | 8.42  | 8.6   | 8.44  | 8.66  | 8.67  | 8.85  |
| 1637453 at   | FBgn0036842 | 10.27 | 10.45 | 10.28 | 10.44 | 10.31 | 10.46 |
| 1628959 at   | FBgn0027658 | 7.86  | 8.03  | 7.98  | 8.14  | 7.69  | 7.98  |
| 1633429 at   | FBgn0014340 | 8.22  | 8.4   | 8.34  | 8.72  | 8.39  | 8.39  |
| 1624604 a at | FBgn0027595 | 8.06  | 8.24  | 7.83  | 8.38  | 8.2   | 8.22  |
| 1639184 at   | FBgn0034940 | 8.49  | 8.67  | 8.51  | 8.69  | 8.53  | 8.55  |
| 1637718 at   | FBgn0037876 | 7.15  | 7.33  | 7.23  | 7.51  | 7.21  | 7.39  |
| 1634501 at   | FBgn0036512 | 8.6   | 8.77  | 8.57  | 8.65  | 8.57  | 8.55  |
| 1634385 at   | FBgn0039731 | 7.92  | 8.09  | 7.94  | 8.44  | 8.2   | 8.24  |
| 1628451 at   | ---         | 8.69  | 8.86  | 8.22  | 8.32  | 8.61  | 8.84  |
| 1638415 at   | ---         | 12.82 | 12.99 | 13.15 | 13.11 | 13.07 | 13.11 |
| 1635684 a at | FBgn0025726 | 7.37  | 7.54  | 7.33  | 7.39  | 7.56  | 7.88  |
| 1636299 at   | FBgn0035036 | 7.2   | 7.38  | 7.38  | 7.63  | 7.45  | 7.4   |

|              |                         |       |       |       |       |       |       |
|--------------|-------------------------|-------|-------|-------|-------|-------|-------|
| 1633731 at   | FBgn0011737             | 9.18  | 9.35  | 9.21  | 9.47  | 9.29  | 9.36  |
| 1624515 at   | FBgn0030932             | 11.71 | 11.88 | 11.43 | 11.65 | 11.7  | 11.64 |
| 1632704 at   | FBgn0033812             | 9.64  | 9.81  | 9.61  | 9.63  | 9.66  | 9.76  |
| 1639145 s at | FBgn0002921             | 9.95  | 10.12 | 10.3  | 10.3  | 9.97  | 10.09 |
| 1637555 at   | FBgn0036197             | 10.41 | 10.59 | 10.65 | 10.7  | 10.44 | 10.44 |
| 1634654 at   | FBgn0011230             | 9.72  | 9.9   | 10.19 | 10.17 | 9.89  | 9.93  |
| 1638590 at   | ---                     | 8.47  | 8.65  | 8.53  | 8.8   | 8.64  | 8.65  |
| 1629956 at   | FBgn0037472             | 9.72  | 9.89  | 9.54  | 9.72  | 9.71  | 9.91  |
| 1626421 at   | FBgn0038735             | 7.09  | 7.27  | 7.47  | 7.57  | 7.48  | 7.45  |
| 1631575 at   | ---                     | 8.96  | 9.14  | 9.05  | 9.19  | 9.13  | 9.12  |
| 1635044 at   | FBgn0001225             | 12.96 | 13.13 | 12.63 | 13.2  | 13.28 | 13.18 |
| 1632094 at   | FBgn0033690             | 9.3   | 9.47  | 9.4   | 9.46  | 9.47  | 9.57  |
| 1639728 at   | FBgn0038401             | 8.91  | 9.08  | 9.02  | 9.21  | 9.05  | 9.07  |
| 1630166 s at | FBgn0002638             | 11.57 | 11.74 | 11.72 | 11.94 | 11.67 | 11.66 |
| 1627562 at   | FBgn0024958             | 8.31  | 8.49  | 8.7   | 8.42  | 8.57  | 8.44  |
| 1629578 at   | FBgn0033902             | 10.79 | 10.96 | 11.36 | 11.08 | 11.17 | 11.03 |
| 1633347 at   | ---                     | 7.82  | 8     | 8.03  | 8.41  | 8.22  | 8.26  |
| 1630176 at   | FBgn0037660             | 7.34  | 7.51  | 7.48  | 7.69  | 7.53  | 7.69  |
| 1624923 s at | ---                     | 9.52  | 9.7   | 9.47  | 9.1   | 9.39  | 9.77  |
| 1627598 at   | FBgn0031233             | 9.29  | 9.46  | 9.41  | 9.59  | 9.37  | 9.38  |
| AFFX-DapX-   | ---                     | 7.63  | 7.81  | 8     | 8.33  | 7.74  | 7.42  |
| 1628807 at   | FBgn0038344             | 8.95  | 9.13  | 9.25  | 9.19  | 9.09  | 9.19  |
| 1623972 a at | FBgn0038745 /// FBgn003 | 9.89  | 10.06 | 10    | 10.1  | 10.01 | 10.13 |
| 1629266 s at | FBgn0033886             | 11.13 | 11.3  | 11.11 | 11.41 | 11.31 | 11.21 |
| 1625080 at   | FBgn0045828             | 12.25 | 12.42 | 12.49 | 12.63 | 12.39 | 12.42 |
| 1622932 s at | FBgn0003447             | 9.82  | 9.99  | 9.88  | 10.15 | 9.78  | 9.91  |
| 1630132 at   | ---                     | 11.2  | 11.37 | 11.5  | 11.44 | 11.44 | 11.29 |
| 1625244 at   | FBgn0031604             | 9.02  | 9.19  | 8.97  | 9.11  | 8.95  | 9.08  |
| 1623631 at   | ---                     | 9.42  | 9.59  | 9.47  | 9.64  | 9.57  | 9.49  |
| 1624594 at   | FBgn0052484             | 9.33  | 9.5   | 9.34  | 9.51  | 9.28  | 9.38  |
| 1635938 s at | FBgn0017561             | 9.68  | 9.85  | 8.84  | 8.74  | 9.76  | 10    |
| 1624343 at   | FBgn0050443             | 8.68  | 8.85  | 8.86  | 8.75  | 8.8   | 8.84  |
| 1628016 s at | ---                     | 8.51  | 8.68  | 8.76  | 8.91  | 8.47  | 8.52  |
| 1627067 at   | FBgn0015614             | 11.38 | 11.55 | 11.31 | 11.3  | 11.5  | 11.6  |
| 1631640 a at | FBgn0033566             | 9.51  | 9.68  | 9.37  | 9.92  | 9.69  | 9.64  |
| 1623247 at   | FBgn0039296             | 8.45  | 8.62  | 8.51  | 8.75  | 8.63  | 8.71  |

|              |             |       |       |       |       |       |       |
|--------------|-------------|-------|-------|-------|-------|-------|-------|
| 1625599 at   | ---         | 8.97  | 9.14  | 8.88  | 9.36  | 9.28  | 9.23  |
| 1638463 at   | FBgn0037656 | 7.36  | 7.53  | 7.51  | 7.71  | 7.61  | 7.68  |
| 1639046 at   | ---         | 9.64  | 9.81  | 9.78  | 9.63  | 9.73  | 9.81  |
| 1637926 s at | FBgn0036855 | 9.19  | 9.36  | 9.43  | 9.35  | 9.34  | 9.42  |
| 1638834 a at | FBgn0026873 | 8.85  | 9.02  | 9.27  | 9.27  | 9.24  | 9.19  |
| 1639347 s at | FBgn0016131 | 8.95  | 9.12  | 9.71  | 9.46  | 9.07  | 9.43  |
| 1640143 at   | FBgn0032819 | 8.17  | 8.34  | 8.4   | 8.07  | 8.23  | 8.35  |
| 1633527 a at | ---         | 8.86  | 9.03  | 8.79  | 8.97  | 8.97  | 9     |
| 1625264 s at | FBgn0013770 | 12.77 | 12.94 | 12.72 | 12.73 | 12.75 | 12.8  |
| 1627455 at   | FBgn0039067 | 8.24  | 8.4   | 8.32  | 8.88  | 8.46  | 8.5   |
| 1635018 at   | FBgn0033935 | 7.95  | 8.11  | 7.78  | 8.15  | 8.12  | 7.99  |
| 1638313 at   | FBgn0033677 | 10.34 | 10.5  | 10.17 | 10.37 | 10.55 | 10.71 |
| 1627377 at   | FBgn0026431 | 8.49  | 8.65  | 8.54  | 9     | 8.87  | 8.62  |
| 1629155 at   | FBgn0031310 | 9.11  | 9.28  | 9.35  | 9.41  | 9.21  | 9.23  |
| 1638539 at   | FBgn0034422 | 9.16  | 9.32  | 9.39  | 9.5   | 9.06  | 9.39  |
| 1635168 at   | FBgn0036991 | 8.79  | 8.95  | 8.75  | 9.06  | 9.13  | 9.07  |
| 1628548 at   | ---         | 9.33  | 9.49  | 9.08  | 9.44  | 9.61  | 9.62  |
| 1630052 s at | FBgn0034089 | 9.65  | 9.81  | 9.9   | 10.14 | 9.85  | 9.88  |
| 1625201 s at | FBgn0046225 | 7.18  | 7.34  | 7.62  | 7.89  | 7.5   | 7.57  |
| 1626701 at   | FBgn0039357 | 8.12  | 8.29  | 8.1   | 7.57  | 8.02  | 8.24  |
| 1628558 at   | FBgn0050022 | 7.96  | 8.13  | 8.08  | 8.11  | 7.99  | 8.14  |
| 1632271 a at | FBgn0035253 | 10.35 | 10.51 | 10.2  | 10.27 | 10.53 | 10.67 |
| 1630882 s at | FBgn0039338 | 9.33  | 9.5   | 9.56  | 9.69  | 9.54  | 9.54  |
| 1633883 at   | FBgn0030787 | 9.93  | 10.09 | 9.54  | 9.8   | 10    | 10.05 |
| 1630123 at   | FBgn0030145 | 7.42  | 7.58  | 7.71  | 8.04  | 7.76  | 7.72  |
| 1627248 at   | FBgn0037705 | 7.74  | 7.9   | 8.28  | 7.86  | 7.98  | 8.25  |
| 1636741 s at | FBgn0026418 | 10.54 | 10.71 | 10.78 | 10.99 | 10.81 | 10.74 |
| 1628701 a at | ---         | 7.82  | 7.99  | 7.99  | 7.84  | 7.81  | 7.42  |
| 1637733 at   | FBgn0051063 | 9.48  | 9.64  | 9.67  | 9.64  | 9.52  | 9.57  |
| 1627938 at   | FBgn0031611 | 6.85  | 7.01  | 7.16  | 7.02  | 7.06  | 6.7   |
| 1632936 at   | FBgn0026616 | 8.77  | 8.94  | 8.77  | 8.9   | 8.72  | 9.06  |
| 1630701 at   | FBgn0029980 | 9.17  | 9.33  | 9.17  | 9.44  | 9.47  | 9.43  |
| 1629198 at   | FBgn0030047 | 7.65  | 7.82  | 7.84  | 8.24  | 7.88  | 7.75  |
| 1635101 at   | FBgn0038418 | 7.09  | 7.25  | 7.07  | 7.17  | 7.3   | 7.15  |
| 1628404 at   | FBgn0037537 | 9.21  | 9.38  | 9.28  | 9.22  | 9.18  | 9.34  |
| 1640859 at   | FBgn0035627 | 8.51  | 8.68  | 8.34  | 8.87  | 8.78  | 8.68  |

|              |                         |       |       |       |       |       |       |
|--------------|-------------------------|-------|-------|-------|-------|-------|-------|
| 1624611 a at | FBgn0034753             | 13.33 | 13.5  | 13.27 | 13.46 | 13.42 | 13.52 |
| 1626359 at   | FBgn0026876             | 8.55  | 8.72  | 8.84  | 9.32  | 8.92  | 8.82  |
| 1627382 at   | FBgn0010638             | 11.79 | 11.96 | 11.93 | 11.64 | 11.71 | 12    |
| 1624755 a at | FBgn0000711             | 9.77  | 9.93  | 10.01 | 10.12 | 9.97  | 9.97  |
| 1629095 a at | FBgn0002719             | 10.15 | 10.31 | 10.56 | 10.28 | 10.12 | 10.2  |
| 1640289 a at | ---                     | 9.63  | 9.8   | 9.99  | 10    | 10.27 | 10.45 |
| 1634839 at   | ---                     | 8.2   | 8.36  | 8.17  | 8.39  | 8.53  | 8.51  |
| 1638598 at   | FBgn0027592             | 8.56  | 8.73  | 8.64  | 9.04  | 8.86  | 8.83  |
| 1625165 at   | ---                     | 7.87  | 8.03  | 7.91  | 8.31  | 8.18  | 8.18  |
| 1634818 s at | FBgn0025704             | 8.8   | 8.96  | 8.75  | 8.71  | 8.59  | 8.55  |
| 1641671 at   | FBgn0033273 /// FBgn001 | 9.86  | 10.03 | 10.01 | 10.25 | 10.01 | 10.04 |
| 1628634 at   | FBgn0036695             | 8.74  | 8.9   | 8.44  | 8.68  | 8.73  | 8.8   |
| 1633886 at   | FBgn0036107             | 9.66  | 9.83  | 9.7   | 9.86  | 9.74  | 9.74  |
| 1626549 at   | FBgn0038274             | 7.82  | 7.98  | 8.07  | 8.37  | 8.17  | 7.95  |
| 1631836 at   | FBgn0032763             | 7.46  | 7.63  | 7.36  | 7.7   | 7.86  | 7.8   |
| 1625068 a at | FBgn0026777             | 11.41 | 11.57 | 11.4  | 11.7  | 11.59 | 11.65 |
| 1631009 at   | FBgn0039559             | 9.81  | 9.98  | 9.93  | 10.09 | 10.03 | 9.99  |
| 1629963 at   | FBgn0028563             | 10.32 | 10.48 | 10.25 | 10.12 | 10.33 | 10.44 |
| 1623728 at   | FBgn0031270             | 7.75  | 7.92  | 7.82  | 8.25  | 8     | 8.05  |
| 1637617 at   | FBgn0034403             | 11.03 | 11.19 | 11.2  | 11.4  | 11.18 | 11.21 |
| 1625177 at   | FBgn0036922             | 7.88  | 8.04  | 7.68  | 8.04  | 8.21  | 8.17  |
| 1638748 at   | FBgn0000575             | 9.52  | 9.69  | 9.88  | 9.33  | 9.38  | 9.94  |
| 1627013 at   | FBgn0030289             | 9.28  | 9.44  | 9.01  | 9.26  | 9.3   | 9.29  |
| 1637739 at   | FBgn0029820             | 8.6   | 8.76  | 8.52  | 8.7   | 8.6   | 8.52  |
| 1639189 at   | FBgn0033984             | 8.75  | 8.91  | 8.34  | 8.61  | 8.69  | 9.1   |
| 1624726 s at | FBgn0037138             | 9.89  | 10.06 | 10.14 | 9.9   | 9.83  | 10.11 |
| 1636297 at   | FBgn0034964             | 8.14  | 8.31  | 8.5   | 8.49  | 8.44  | 8.27  |
| 1634411 at   | FBgn0030874             | 8.36  | 8.53  | 8.43  | 8.65  | 8.51  | 8.52  |
| 1634107 at   | ---                     | 9.08  | 9.24  | 9.34  | 9.24  | 9.24  | 9.17  |
| 1638339 at   | FBgn0034430             | 9.9   | 10.06 | 10.03 | 10.26 | 10.07 | 10.12 |
| 1623918 at   | ---                     | 9.32  | 9.48  | 9.24  | 9.3   | 9.42  | 9.45  |
| 1636221 a at | FBgn0003716             | 9.8   | 9.97  | 9.87  | 9.68  | 9.89  | 9.94  |
| 1630013 s at | FBgn0032224             | 9.95  | 10.11 | 9.97  | 10.02 | 9.96  | 10.11 |
| 1634963 at   | FBgn0039907             | 9.13  | 9.3   | 9.17  | 9.17  | 9.13  | 9.34  |
| 1637217 at   | FBgn0035324             | 7.89  | 8.05  | 8.27  | 8.42  | 8.25  | 7.98  |
| 1628368 at   | FBgn0024291             | 10.56 | 10.73 | 10.47 | 10.61 | 10.63 | 10.74 |

|              |                         |       |       |       |       |       |       |
|--------------|-------------------------|-------|-------|-------|-------|-------|-------|
| 1636788 a at | FBgn0032515             | 9.24  | 9.4   | 9.15  | 9.84  | 9.53  | 9.39  |
| 1640315 at   | FBgn0051241             | 7.68  | 7.84  | 7.71  | 8.17  | 7.88  | 7.84  |
| 1637110 at   | FBgn0037028             | 7.82  | 7.98  | 8.1   | 8.1   | 7.67  | 7.7   |
| 1632418 s at | FBgn0003165             | 10.29 | 10.45 | 10.34 | 10.28 | 10.34 | 10.47 |
| 1639581 at   | FBgn0035462             | 7.31  | 7.47  | 7.29  | 7.95  | 7.55  | 7.55  |
| 1632783 a at | FBgn0003612             | 9.57  | 9.73  | 9.61  | 10.02 | 9.7   | 9.72  |
| 1627359 at   | FBgn0030596             | 7.02  | 7.18  | 7.73  | 6.08  | 5.79  | 7.46  |
| 1635587 s at | FBgn0020312             | 8.87  | 9.03  | 8.71  | 8.99  | 8.9   | 9.09  |
| 1637606 at   | FBgn0031535             | 10.36 | 10.52 | 10.14 | 10.36 | 10.43 | 10.47 |
| 1638846 at   | ---                     | 9.42  | 9.58  | 9.43  | 9.4   | 9.47  | 9.71  |
| 1639410 at   | FBgn0027095             | 10.05 | 10.21 | 10.42 | 10.29 | 10.16 | 10.39 |
| 1634672 at   | FBgn0035947             | 10.18 | 10.34 | 10.65 | 10.58 | 10.31 | 10.36 |
| 1632206 at   | FBgn0039459             | 9.12  | 9.28  | 8.66  | 8.77  | 9.43  | 9.23  |
| 1626940 at   | FBgn0027548             | 9.27  | 9.43  | 9.35  | 9.16  | 9.24  | 9.21  |
| 1623493 at   | FBgn0030420             | 6.75  | 6.91  | 6.67  | 7.17  | 7.1   | 6.89  |
| 1639038 at   | FBgn0030654 /// FBgn003 | 8.04  | 8.2   | 7.92  | 8.15  | 8.02  | 7.98  |
| 1627204 at   | FBgn0031308             | 7.97  | 8.13  | 8.36  | 8.16  | 8.02  | 8.02  |
| 1625681 at   | FBgn0030141             | 8.76  | 8.92  | 9     | 9     | 9.06  | 9     |
| 1626844 at   | FBgn0001222             | 10.9  | 11.06 | 10.87 | 11.18 | 11    | 11.14 |
| 1635547 a at | FBgn0010803             | 9.22  | 9.38  | 9.3   | 9.59  | 9.31  | 9.38  |
| 1635343 a at | FBgn0025676             | 7.4   | 7.56  | 8.01  | 8.08  | 8.27  | 8.26  |
| 1637536 at   | FBgn0038633             | 7.35  | 7.5   | 7.7   | 7.26  | 7.27  | 7.61  |
| 1634000 a at | FBgn0030345             | 10.03 | 10.19 | 9.79  | 10.03 | 10.02 | 10.12 |
| 1625422 at   | FBgn0036614             | 7.9   | 8.06  | 7.99  | 8.34  | 8.17  | 8.09  |
| 1634859 at   | FBgn0031951             | 8.19  | 8.34  | 8.24  | 8.52  | 8.23  | 8.68  |
| 1631328 s at | FBgn0032474             | 9.99  | 10.15 | 9.59  | 9.72  | 9.85  | 9.87  |
| 1640441 at   | ---                     | 10.18 | 10.34 | 10.35 | 10.37 | 10.13 | 10.29 |
| 1626278 at   | FBgn0032453             | 11.48 | 11.64 | 11.63 | 11.87 | 11.68 | 11.76 |
| 1632852 s at | FBgn0001142             | 11.24 | 11.4  | 11.46 | 11.46 | 11.34 | 11.53 |
| 1633253 s at | FBgn0031474             | 9.18  | 9.34  | 9.39  | 9.48  | 9.41  | 9.54  |
| 1631831 at   | ---                     | 7.36  | 7.52  | 7.44  | 7.83  | 7.62  | 7.49  |
| 1632605 at   | FBgn0028552             | 7.99  | 8.15  | 7.97  | 8.27  | 8.38  | 8.24  |
| 1626985 a at | FBgn0027509 /// FBgn003 | 10.28 | 10.44 | 10.46 | 10.66 | 10.41 | 10.58 |
| 1640644 at   | FBgn0038745 /// FBgn003 | 10.16 | 10.31 | 10.45 | 10.31 | 10.26 | 10.47 |
| 1629954 at   | FBgn0033962             | 8.73  | 8.88  | 9.1   | 8.84  | 8.73  | 8.93  |
| 1629109 at   | FBgn0035848             | 9.14  | 9.3   | 9.1   | 9.5   | 9.19  | 9.28  |

|              |                         |       |       |       |       |       |       |
|--------------|-------------------------|-------|-------|-------|-------|-------|-------|
| 1623458 at   | FBgn0038438             | 9.41  | 9.57  | 9.44  | 9.3   | 9.6   | 9.71  |
| 1627845 at   | FBgn0035906             | 10.21 | 10.37 | 10.46 | 10.44 | 10.36 | 10.34 |
| 1633847 at   | FBgn0030056             | 11.22 | 11.38 | 11.2  | 11.38 | 11.36 | 11.33 |
| 1635570 a at | FBgn0014467             | 7.45  | 7.6   | 7.29  | 7.33  | 7.29  | 7.3   |
| 1638162 s at | FBgn0035357             | 9.06  | 9.22  | 9.17  | 9.34  | 9.1   | 9.2   |
| 1635887 at   | FBgn0050094             | 7.66  | 7.82  | 7.85  | 7.82  | 7.85  | 7.82  |
| 1633335 at   | FBgn0001965             | 8.42  | 8.57  | 8.42  | 8.58  | 8.63  | 8.61  |
| 1634895 s at | FBgn0014010             | 10.06 | 10.22 | 10.36 | 10.34 | 10.23 | 10.59 |
| 1625742 at   | FBgn0034913             | 10.34 | 10.5  | 10.44 | 10.55 | 10.61 | 10.57 |
| 1634858 s at | FBgn0037917             | 8.49  | 8.65  | 8.74  | 8.88  | 8.82  | 8.91  |
| 1631357 at   | ---                     | 8.34  | 8.49  | 7.95  | 7.87  | 8.09  | 8.11  |
| 1640452 at   | FBgn0030411             | 8.35  | 8.51  | 8.19  | 8.64  | 8.54  | 8.5   |
| 1639205 s at | FBgn0003742             | 10.09 | 10.25 | 9.98  | 10.1  | 10.02 | 10.31 |
| 1623975 at   | FBgn0025185             | 8.16  | 8.32  | 8.36  | 8.83  | 8.54  | 8.49  |
| 1635344 at   | FBgn0020018             | 8.4   | 8.55  | 8.25  | 8.69  | 8.51  | 8.34  |
| 1631630 at   | ---                     | 9.82  | 9.97  | 9.8   | 10.25 | 9.93  | 9.95  |
| 1638140 at   | FBgn0031659             | 8.72  | 8.87  | 8.9   | 9.08  | 8.72  | 8.8   |
| 1637532 s at | FBgn0036975 /// FBgn003 | 10.72 | 10.87 | 10.91 | 10.96 | 10.65 | 10.76 |
| 1627629 at   | FBgn0029868             | 10.08 | 10.23 | 10.54 | 10.34 | 10.22 | 10.37 |
| 1626752 at   | FBgn0028530             | 8.49  | 8.64  | 8.62  | 8.85  | 8.51  | 8.57  |
| 1640173 at   | ---                     | 8.63  | 8.79  | 8.66  | 8.86  | 8.84  | 8.75  |
| 1641575 at   | FBgn0037963             | 9.57  | 9.73  | 9.77  | 9.56  | 9.39  | 9.75  |
| 1630355 a at | FBgn0028932             | 7.23  | 7.38  | 7.65  | 7.35  | 7.48  | 7.52  |
| 1638175 at   | FBgn0020272             | 8.82  | 8.97  | 8.94  | 9.21  | 8.84  | 8.75  |
| 1626180 at   | FBgn0034794             | 9.36  | 9.52  | 9.46  | 9.83  | 9.41  | 9.39  |
| 1623069 s at | FBgn0032775             | 8.81  | 8.96  | 8.93  | 8.91  | 8.56  | 8.55  |
| 1634009 at   | FBgn0036472             | 8.45  | 8.61  | 8.39  | 8.22  | 8.63  | 8.57  |
| 1635743 at   | FBgn0015838             | 8.83  | 8.98  | 9.12  | 8.86  | 9.21  | 9.45  |
| 1625750 at   | FBgn0038830             | 9.77  | 9.92  | 10.05 | 9.8   | 9.89  | 10.01 |
| 1629045 s at | ---                     | 7.82  | 7.97  | 7.74  | 7.92  | 7.83  | 7.83  |
| 1623383 at   | FBgn0042131 /// FBgn001 | 9.97  | 10.13 | 10.28 | 10.2  | 10.03 | 10.01 |
| 1640791 at   | FBgn0023216             | 7.86  | 8.01  | 8.25  | 8.57  | 8.15  | 8.19  |
| 1626813 at   | ---                     | 11.07 | 11.22 | 11.2  | 11.46 | 11.19 | 11.18 |
| 1623582 at   | FBgn0039179             | 9.3   | 9.45  | 9.4   | 9.49  | 9.51  | 9.61  |
| 1641331 at   | FBgn0038769             | 6.95  | 7.1   | 6.76  | 6.97  | 7.12  | 7.02  |
| 1639034 at   | FBgn0039687             | 8.65  | 8.8   | 8.9   | 9.07  | 8.88  | 8.91  |

|              |             |       |       |       |       |       |       |
|--------------|-------------|-------|-------|-------|-------|-------|-------|
| 1627843 at   | FBgn0026148 | 8.55  | 8.7   | 8.51  | 8.83  | 8.97  | 8.88  |
| 1639999 at   | FBgn0024993 | 8.4   | 8.55  | 8.35  | 8.67  | 8.85  | 8.71  |
| 1632130 s at | FBgn0026370 | 7.07  | 7.22  | 7.55  | 7.51  | 7.76  | 8.17  |
| 1641317 at   | ---         | 9.87  | 10.02 | 10.09 | 10.4  | 10.03 | 10.16 |
| 1634074 a at | FBgn0015565 | 12.18 | 12.33 | 11.29 | 11.58 | 12.13 | 12.16 |
| 1624138 at   | FBgn0030855 | 8.24  | 8.39  | 8.61  | 8.56  | 8.39  | 8.35  |
| 1625855 at   | FBgn0035149 | 8.91  | 9.06  | 9.03  | 9.04  | 8.97  | 8.95  |
| 1634690 at   | FBgn0033881 | 9.52  | 9.67  | 9.62  | 10.13 | 9.83  | 9.81  |
| 1639055 at   | FBgn0032101 | 9.69  | 9.84  | 9.81  | 9.35  | 9.84  | 9.97  |
| 1638354 at   | FBgn0037293 | 8.71  | 8.86  | 8.83  | 8.92  | 8.89  | 8.91  |
| 1636695 at   | FBgn0004462 | 8.75  | 8.9   | 9.23  | 9.6   | 8.79  | 8.94  |
| 1637559 at   | FBgn0039126 | 9.87  | 10.02 | 9.95  | 10.25 | 10.02 | 10.07 |
| 1631984 at   | FBgn0031282 | 7.63  | 7.78  | 7.59  | 7.89  | 7.69  | 7.75  |
| 1637525 s at | FBgn0026409 | 12.44 | 12.59 | 12.63 | 12.69 | 12.63 | 12.59 |
| 1631051 at   | FBgn0032883 | 7.9   | 8.05  | 8.02  | 8.29  | 8.08  | 8.12  |
| 1630660 at   | ---         | 10.2  | 10.35 | 10.35 | 10.83 | 9.52  | 9.92  |
| 1637973 a at | FBgn0030431 | 9.38  | 9.53  | 9.43  | 9.54  | 9.38  | 9.37  |
| 1630167 at   | FBgn0024841 | 10.79 | 10.94 | 10.56 | 10.52 | 10.74 | 10.65 |
| 1625119 at   | FBgn0034249 | 7.66  | 7.81  | 7.55  | 7.92  | 7.71  | 7.75  |
| 1638848 at   | FBgn0037792 | 8.62  | 8.77  | 8.9   | 9.02  | 8.8   | 8.89  |
| 1638930 s at | FBgn0037117 | 7.86  | 8.01  | 7.69  | 7.71  | 7.97  | 8.12  |
| 1632739 at   | FBgn0052536 | 8.1   | 8.25  | 7.54  | 7.54  | 7.2   | 7.41  |
| 1623293 at   | FBgn0037018 | 9.32  | 9.47  | 9.43  | 9.58  | 9.34  | 9.43  |
| 1627509 s at | FBgn0041150 | 10.26 | 10.41 | 10.25 | 10.43 | 10.36 | 10.37 |
| 1627009 at   | FBgn0003527 | 8.88  | 9.03  | 9.02  | 9.08  | 9.12  | 9.03  |
| 1639574 a at | FBgn0003218 | 7.6   | 7.74  | 7.77  | 8.06  | 7.92  | 7.82  |
| 1632433 at   | FBgn0031194 | 7.99  | 8.14  | 8.19  | 8.64  | 8.29  | 8.36  |
| 1622983 a at | FBgn0021761 | 9.81  | 9.96  | 9.95  | 10.07 | 9.89  | 9.89  |
| 1623061 at   | FBgn0002036 | 7.87  | 8.02  | 7.83  | 8.2   | 7.96  | 7.86  |
| 1638267 s at | FBgn0010504 | 8.56  | 8.71  | 8.68  | 8.65  | 8.18  | 8.43  |
| 1632818 at   | FBgn0052281 | 7.73  | 7.88  | 8.27  | 8.26  | 7.81  | 7.98  |
| 1626719 a at | FBgn0036141 | 9.88  | 10.03 | 9.86  | 10.15 | 10.01 | 10.04 |
| 1624211 at   | FBgn0033638 | 8.38  | 8.53  | 8.07  | 8.06  | 8.29  | 8.5   |
| 1623239 at   | FBgn0014269 | 9.04  | 9.19  | 9.1   | 9.47  | 9.29  | 9.29  |
| 1631993 s at | FBgn0000064 | 10.93 | 11.07 | 11.29 | 11.26 | 11.08 | 11.24 |
| 1635531 at   | FBgn0011705 | 10.54 | 10.69 | 10.32 | 10.06 | 10.42 | 10.74 |



|              |                         |       |       |       |       |       |       |
|--------------|-------------------------|-------|-------|-------|-------|-------|-------|
| 1638095 at   | FBgn0031227             | 8.73  | 8.88  | 8.91  | 9.08  | 8.63  | 8.89  |
| 1626347 at   | FBgn0035337             | 8.52  | 8.66  | 8.64  | 8.48  | 8.62  | 8.73  |
| 1632510 at   | FBgn0030973             | 8.65  | 8.79  | 8.98  | 9.27  | 8.89  | 8.8   |
| 1638216 at   | ---                     | 8.08  | 8.23  | 8.07  | 7.86  | 7.89  | 8.03  |
| 1623434 at   | FBgn0031590             | 10.32 | 10.46 | 10.38 | 10.53 | 10.23 | 10.31 |
| 1623235 at   | ---                     | 7.87  | 8.02  | 8.12  | 8.33  | 8.08  | 7.97  |
| 1623943 at   | FBgn0038462             | 10.5  | 10.65 | 10.17 | 10.29 | 10.77 | 10.7  |
| 1634844 at   | FBgn0031092             | 9.38  | 9.53  | 9.81  | 9.63  | 9.45  | 9.51  |
| 1630406 at   | FBgn0040513             | 7.13  | 7.28  | 7.12  | 7.36  | 6.93  | 7.02  |
| 1632403 at   | FBgn0034346             | 7.8   | 7.94  | 7.68  | 7.81  | 7.75  | 7.86  |
| 1629123 at   | FBgn0039141             | 9.22  | 9.37  | 9.47  | 9.15  | 9.27  | 9.47  |
| 1626385 s at | ---                     | 9.76  | 9.91  | 9.89  | 10.17 | 9.9   | 10    |
| 1637130 at   | ---                     | 10.08 | 10.23 | 10.16 | 10.17 | 10.13 | 10.32 |
| 1635796 a at | FBgn0000251             | 10.93 | 11.07 | 10.74 | 10.88 | 11.01 | 11.11 |
| 1630803 at   | ---                     | 9.16  | 9.31  | 9.23  | 9.39  | 9.26  | 9.23  |
| 1625172 s at | FBgn0039890             | 9.96  | 10.1  | 10.06 | 10.22 | 10.19 | 10.21 |
| 1636991 s at | FBgn0010435             | 7.84  | 7.99  | 8.04  | 7.03  | 7.1   | 7.82  |
| 1637601 at   | FBgn0036509             | 8.44  | 8.58  | 8.74  | 8.31  | 8.18  | 8.52  |
| 1633292 a at | FBgn0036272             | 10.28 | 10.43 | 10.59 | 10.77 | 10.51 | 10.65 |
| 1636255 s at | FBgn0034117             | 9.64  | 9.78  | 9.43  | 9.54  | 9.52  | 9.69  |
| 1637244 at   | ---                     | 7.71  | 7.85  | 7.66  | 8.02  | 7.74  | 7.68  |
| 1636210 at   | FBgn0036354             | 8.77  | 8.91  | 8.49  | 9.36  | 8.97  | 8.96  |
| 1628283 at   | FBgn0029999             | 8.57  | 8.71  | 8.57  | 8.79  | 8.65  | 8.48  |
| 1636801 at   | FBgn0033352             | 8.99  | 9.13  | 9.22  | 9.05  | 9.07  | 8.98  |
| 1640813 at   | FBgn0023536             | 8.04  | 8.19  | 8.22  | 8.29  | 8.2   | 8.08  |
| 1633764 a at | FBgn0030813             | 7.25  | 7.4   | 7.58  | 7.9   | 7.59  | 7.69  |
| 1624480 at   | ---                     | 9.16  | 9.3   | 9.42  | 9.47  | 9.24  | 9.06  |
| 1624684 at   | FBgn0039401             | 8.14  | 8.28  | 8.2   | 8.45  | 8.28  | 8.19  |
| 1625549 at   | FBgn0033842             | 8.55  | 8.69  | 8.49  | 9.16  | 8.57  | 8.65  |
| 1639873 at   | FBgn0035901 /// FBgn003 | 7.47  | 7.62  | 7.15  | 7.45  | 7.51  | 7.5   |
| 1633174 at   | FBgn0003525             | 11.39 | 11.53 | 11.25 | 11.73 | 11.51 | 11.68 |
| 1641424 at   | FBgn0030768             | 8.6   | 8.75  | 8.75  | 9.08  | 8.93  | 8.86  |
| 1640576 a at | FBgn0003015             | 10.32 | 10.46 | 10.52 | 10.61 | 10.15 | 10.36 |
| 1637799 at   | FBgn0003257             | 9.79  | 9.94  | 10.08 | 9.92  | 9.87  | 9.93  |
| 1641687 at   | FBgn0004908             | 8.44  | 8.59  | 8.82  | 8.82  | 8.62  | 8.62  |
| 1640268 at   | FBgn0002781             | 7.84  | 7.98  | 7.56  | 7.76  | 7.74  | 7.89  |

|              |             |       |       |       |       |       |       |
|--------------|-------------|-------|-------|-------|-------|-------|-------|
| 1623130 at   | ---         | 7.05  | 7.19  | 6.97  | 7     | 7.03  | 7.19  |
| 1632233 at   | FBgn0033316 | 9.15  | 9.3   | 9.25  | 9.45  | 9.27  | 9.2   |
| 1638179 at   | FBgn0033209 | 11.2  | 11.35 | 11.15 | 10.67 | 11.11 | 11.24 |
| 1630774 s at | FBgn0003371 | 7.34  | 7.48  | 8.28  | 7.87  | 7.29  | 7.71  |
| 1635904 s at | FBgn0012049 | 10.32 | 10.47 | 10.33 | 10.24 | 10.34 | 10.47 |
| 1630887 a at | FBgn0035500 | 10.54 | 10.69 | 10.54 | 10.64 | 10.53 | 10.7  |
| 1638358 s at | FBgn0000242 | 7.49  | 7.63  | 7.05  | 7.36  | 7.54  | 7.63  |
| 1625590 a at | FBgn0025720 | 9.91  | 10.05 | 9.7   | 9.99  | 9.98  | 10.07 |
| 1626553 at   | FBgn0032702 | 9.04  | 9.18  | 9.22  | 9.24  | 9.17  | 9.24  |
| 1637319 at   | FBgn0037781 | 7.8   | 7.94  | 7.6   | 8.17  | 8.15  | 7.93  |
| 1636628 at   | FBgn0033486 | 9.79  | 9.93  | 9.83  | 10.02 | 9.92  | 9.97  |
| 1635634 at   | FBgn0037102 | 8.8   | 8.94  | 9.05  | 8.99  | 9.04  | 9.08  |
| 1627567 at   | FBgn0002914 | 8.64  | 8.78  | 8.84  | 9     | 8.88  | 8.81  |
| 1628743 at   | FBgn0015229 | 9.89  | 10.03 | 9.96  | 10.01 | 9.9   | 10.09 |
| 1624539 at   | FBgn0038870 | 8.43  | 8.58  | 8.51  | 8.48  | 8.38  | 8.47  |
| 1625137 at   | FBgn0037967 | 8.27  | 8.41  | 8.19  | 8.71  | 8.44  | 8.37  |
| 1626304 at   | ---         | 11.22 | 11.36 | 11.11 | 11.09 | 11.12 | 11.32 |
| 1640741 at   | FBgn0030806 | 7.11  | 7.25  | 7.25  | 7.64  | 7.4   | 7.45  |
| 1638014 at   | FBgn0027617 | 7.58  | 7.72  | 7.93  | 8.25  | 7.66  | 7.8   |
| 1631849 at   | FBgn0028375 | 8.98  | 9.12  | 8.9   | 8.92  | 9.01  | 9.18  |
| 1637546 at   | FBgn0000100 | 13.59 | 13.73 | 13.71 | 13.48 | 13.59 | 13.7  |
| 1638104 a at | FBgn0052951 | 8     | 8.14  | 8.71  | 8.13  | 8.04  | 8.17  |
| 1640796 a at | FBgn0031119 | 9.02  | 9.16  | 9.08  | 9.28  | 9.26  | 9.41  |
| 1630027 s at | FBgn0053113 | 12.29 | 12.43 | 12.23 | 12.2  | 12.09 | 12.5  |
| 1640187 a at | FBgn0031115 | 8.53  | 8.67  | 8.58  | 8.81  | 8.52  | 8.58  |
| 1629117 at   | FBgn0030930 | 9.2   | 9.34  | 9.15  | 9.06  | 9.16  | 9.3   |
| 1638680 at   | FBgn0038857 | 8.88  | 9.02  | 9.12  | 9.14  | 9.01  | 9.08  |
| 1629797 at   | FBgn0015797 | 8.42  | 8.56  | 8.45  | 8.26  | 8.5   | 8.54  |
| 1633491 s at | ---         | 8.76  | 8.9   | 8.6   | 8.45  | 8.88  | 8.94  |
| 1623335 a at | FBgn0038326 | 10.2  | 10.34 | 10.24 | 10.15 | 10.11 | 10.28 |
| 1634408 at   | FBgn0033971 | 9.01  | 9.15  | 9.09  | 8.9   | 8.85  | 9.12  |
| 1635476 at   | FBgn0034614 | 8.67  | 8.81  | 9.02  | 9.16  | 9.07  | 8.93  |
| 1637758 at   | FBgn0033584 | 8.89  | 9.03  | 9.09  | 9.31  | 8.85  | 9.02  |
| 1636465 at   | FBgn0030659 | 8.04  | 8.18  | 8.16  | 8.38  | 8.32  | 8.18  |
| 1640713 at   | FBgn0034919 | 9.3   | 9.44  | 9.65  | 9.69  | 9.54  | 9.63  |
| 1632489 a at | FBgn0038425 | 8.54  | 8.68  | 8.7   | 8.83  | 8.69  | 8.72  |

|              |                         |       |       |       |       |       |       |
|--------------|-------------------------|-------|-------|-------|-------|-------|-------|
| 1629001 at   | FBgn0032454             | 9.3   | 9.44  | 9.47  | 9.5   | 9.4   | 9.45  |
| 1641115 at   | FBgn0037482             | 9.1   | 9.24  | 9.33  | 9.54  | 9.18  | 9.29  |
| 1638527 a at | FBgn0058196             | 10.35 | 10.49 | 10.35 | 10.57 | 10.53 | 10.63 |
| 1638605 at   | FBgn0031893             | 8.95  | 9.09  | 8.83  | 9.1   | 9.29  | 9.1   |
| 1629124 at   | FBgn0036248             | 9.44  | 9.58  | 9.59  | 9.83  | 9.73  | 9.8   |
| 1624901 at   | FBgn0032907             | 8.33  | 8.47  | 8.44  | 8.67  | 8.87  | 8.74  |
| 1629941 a at | FBgn0035829             | 10.52 | 10.66 | 10.5  | 10.66 | 10.71 | 10.85 |
| 1625806 at   | FBgn0003134             | 9.28  | 9.42  | 9.44  | 9.33  | 9.39  | 9.51  |
| 1625672 s at | ---                     | 7.39  | 7.53  | 6.36  | 6.33  | 6.88  | 7.17  |
| 1637830 s at | FBgn0051145             | 7.04  | 7.18  | 7.45  | 6.6   | 6.53  | 6.93  |
| 1637810 at   | FBgn0032446             | 8.07  | 8.21  | 7.97  | 8.17  | 8.2   | 8.22  |
| 1635967 at   | FBgn0019662             | 7.29  | 7.43  | 7.3   | 7.27  | 7.24  | 7.31  |
| 1627478 at   | FBgn0035347 /// FBgn003 | 8.7   | 8.84  | 9.15  | 8.75  | 8.73  | 8.86  |
| 1624231 s at | FBgn0010348             | 11.3  | 11.44 | 11.72 | 11.58 | 11.36 | 11.55 |
| 1627888 at   | FBgn0037875             | 9.71  | 9.85  | 9.7   | 9.74  | 9.61  | 9.86  |
| 1628801 at   | ---                     | 7.36  | 7.5   | 7.6   | 7.73  | 7.65  | 7.58  |
| 1633338 at   | ---                     | 9.37  | 9.51  | 9.45  | 9.64  | 9.56  | 9.63  |
| AFFX-Dros-C  | FBgn0001092             | 11.51 | 11.65 | 11.46 | 11.59 | 11.95 | 11.89 |
| 1634740 at   | FBgn0030502             | 7.96  | 8.1   | 8.17  | 8.44  | 8.1   | 8.21  |
| 1634471 at   | FBgn0053214             | 8.85  | 8.99  | 7.96  | 8.35  | 8.42  | 8.49  |
| 1639519 at   | FBgn0032172             | 9.52  | 9.66  | 9.43  | 9.57  | 9.46  | 9.64  |
| 1637542 s at | FBgn0052956             | 7.43  | 7.56  | 7.76  | 7.95  | 7.52  | 7.59  |
| 1641469 at   | FBgn0032882             | 8.17  | 8.31  | 8.02  | 8.16  | 8.17  | 8.1   |
| 1637508 at   | ---                     | 8.74  | 8.88  | 8.45  | 8.61  | 8.47  | 8.72  |
| 1637827 at   | ---                     | 9.56  | 9.7   | 8.93  | 9.1   | 9.78  | 9.87  |
| 1627498 at   | FBgn0053094             | 9.17  | 9.31  | 9.17  | 9.2   | 9.28  | 9.31  |
| 1623583 at   | FBgn0031291             | 8.88  | 9.01  | 8.65  | 9.05  | 9.17  | 9.08  |
| 1636484 at   | ---                     | 9.79  | 9.93  | 9.68  | 9.75  | 9.84  | 9.98  |
| 1639938 at   | FBgn0036571             | 7.33  | 7.47  | 7.78  | 7.83  | 7.43  | 7.46  |
| 1628565 at   | FBgn0031224             | 9.46  | 9.6   | 9.59  | 9.99  | 9.29  | 9.38  |
| 1631213 at   | FBgn0031093             | 7.67  | 7.81  | 8.02  | 8.3   | 7.94  | 7.72  |
| 1628956 at   | FBgn0026149             | 9.37  | 9.51  | 9.35  | 9.57  | 9.52  | 9.74  |
| 1641183 a at | FBgn0032482             | 10.32 | 10.46 | 9.96  | 9.93  | 10.13 | 10.3  |
| 1630332 at   | FBgn0031600             | 9.73  | 9.87  | 9.71  | 9.78  | 9.9   | 9.9   |
| 1633092 at   | ---                     | 11.5  | 11.63 | 11.65 | 11.69 | 11.55 | 11.53 |
| 1625888 a at | FBgn0035416             | 8.94  | 9.08  | 9.05  | 8.92  | 8.96  | 9.1   |

|              |             |       |       |       |       |       |       |
|--------------|-------------|-------|-------|-------|-------|-------|-------|
| 1640091 at   | FBgn0030794 | 8.5   | 8.63  | 8.32  | 8.63  | 8.71  | 8.58  |
| 1633210 at   | FBgn0035592 | 9.9   | 10.03 | 10.02 | 10    | 9.94  | 10.02 |
| 1626782 at   | FBgn0032596 | 11.64 | 11.78 | 11.78 | 11.72 | 11.74 | 11.71 |
| 1633506 s at | FBgn0036180 | 7.37  | 7.51  | 7.57  | 7.95  | 7.59  | 7.55  |
| 1629290 at   | FBgn0025800 | 8.56  | 8.7   | 8.88  | 8.75  | 8.78  | 8.97  |
| 1638890 at   | FBgn0021795 | 11.54 | 11.68 | 11.54 | 11.33 | 11.54 | 11.7  |
| 1634204 at   | FBgn0012344 | 9.35  | 9.49  | 9.55  | 9.62  | 9.4   | 9.51  |
| 1640862 a at | FBgn0015925 | 9.15  | 9.29  | 9.21  | 9.3   | 9.25  | 9.29  |
| 1633082 at   | FBgn0038129 | 7.93  | 8.07  | 8.08  | 8.22  | 7.94  | 7.93  |
| 1623359 at   | FBgn0003459 | 7.54  | 7.68  | 7.85  | 8.07  | 7.61  | 7.64  |
| 1629852 at   | FBgn0035318 | 9.29  | 9.43  | 8.92  | 9.28  | 9.17  | 9.14  |
| 1626864 at   | FBgn0033377 | 8.94  | 9.08  | 9.4   | 9.36  | 8.94  | 9.01  |
| 1636684 at   | FBgn0051126 | 9.19  | 9.32  | 9.48  | 9.41  | 9.23  | 9.27  |
| 1639480 at   | ---         | 8.7   | 8.83  | 9.06  | 8.67  | 8.57  | 8.74  |
| 1628957 at   | FBgn0001974 | 9.3   | 9.44  | 9.31  | 9.65  | 9.34  | 9.45  |
| 1638400 at   | FBgn0033917 | 9.09  | 9.23  | 9.74  | 9.83  | 9.6   | 9.3   |
| 1636557 a at | ---         | 9.51  | 9.64  | 9.65  | 9.96  | 9.65  | 9.56  |
| 1624943 at   | FBgn0030030 | 7.01  | 7.15  | 7.21  | 7.42  | 7.13  | 7.09  |
| 1639148 at   | FBgn0032407 | 9.78  | 9.92  | 9.94  | 9.93  | 9.56  | 9.65  |
| 1632182 at   | FBgn0030457 | 8.48  | 8.61  | 8.62  | 8.76  | 8.57  | 8.6   |
| 1634876 at   | FBgn0032153 | 7.04  | 7.18  | 7.38  | 7.88  | 7.14  | 7.11  |
| 1640055 at   | FBgn0034982 | 8.77  | 8.91  | 9.06  | 9.04  | 8.87  | 8.86  |
| 1628947 s at | FBgn0002778 | 9.96  | 10.09 | 10.26 | 10.28 | 9.81  | 10.01 |
| 1640391 at   | FBgn0000709 | 9.65  | 9.78  | 9.57  | 9.51  | 9.65  | 9.8   |
| 1639251 at   | FBgn0039251 | 9.91  | 10.05 | 9.6   | 10.06 | 9.55  | 9.93  |
| 1624185 at   | FBgn0037440 | 7.27  | 7.41  | 7.68  | 7.57  | 7.31  | 7.33  |
| 1633884 at   | FBgn0034722 | 9.05  | 9.18  | 9.29  | 9.37  | 9.21  | 9.16  |
| 1623553 a at | FBgn0039140 | 9.31  | 9.45  | 9.46  | 9.5   | 9.59  | 9.57  |
| 1632626 at   | ---         | 8.29  | 8.42  | 8.25  | 8.41  | 8.38  | 8.4   |
| 1636867 s at | FBgn0038244 | 8.97  | 9.1   | 9.03  | 9.01  | 9.06  | 9.1   |
| 1634746 at   | FBgn0035065 | 8.52  | 8.66  | 8.55  | 8.78  | 8.65  | 8.56  |
| 1633794 a at | FBgn0031303 | 10.57 | 10.7  | 10.04 | 10.22 | 10.05 | 10.17 |
| 1638997 at   | FBgn0050342 | 8.32  | 8.46  | 8.71  | 8.88  | 8.79  | 8.67  |
| 1632919 at   | FBgn0038965 | 9.03  | 9.17  | 9.23  | 9.48  | 9.31  | 9.22  |
| 1634668 at   | FBgn0019972 | 10.28 | 10.41 | 10.18 | 10.31 | 10.21 | 10.27 |
| 1631161 at   | FBgn0011207 | 9.35  | 9.49  | 9.4   | 9.5   | 9.44  | 9.54  |

|              |                         |       |       |       |       |       |       |
|--------------|-------------------------|-------|-------|-------|-------|-------|-------|
| 1626967 at   | ---                     | 9.66  | 9.79  | 9.79  | 9.87  | 9.77  | 9.84  |
| 1635805 at   | FBgn0034703             | 8.12  | 8.25  | 8.33  | 8.62  | 8.43  | 8.49  |
| 1630658 at   | FBgn0052226             | 9.02  | 9.15  | 8.64  | 8.8   | 9.05  | 9.11  |
| 1633554 at   | FBgn0000352             | 9.99  | 10.12 | 9.94  | 9.8   | 10.01 | 10.14 |
| 1627227 at   | FBgn0014869             | 8.12  | 8.25  | 7.99  | 8.12  | 8.27  | 8.21  |
| 1638416 at   | FBgn0015031             | 11.5  | 11.63 | 11.8  | 11.62 | 11.56 | 11.7  |
| 1640380 a at | FBgn0035145             | 8.92  | 9.05  | 9.47  | 9.35  | 9.29  | 9.41  |
| 1634186 a at | FBgn0039045             | 7.29  | 7.42  | 7.62  | 6.69  | 6.44  | 7.2   |
| 1633622 at   | FBgn0031643             | 8.46  | 8.59  | 8.51  | 8.88  | 8.67  | 8.68  |
| 1628552 at   | FBgn0038588             | 9.39  | 9.53  | 9.34  | 9.74  | 9.41  | 9.47  |
| 1627525 a at | FBgn0028736             | 8.91  | 9.04  | 8.76  | 8.89  | 8.87  | 8.99  |
| 1638591 at   | FBgn0032988             | 10.78 | 10.92 | 10.99 | 10.85 | 10.78 | 10.94 |
| 1629884 at   | FBgn0051652             | 9.98  | 10.11 | 10.28 | 9.87  | 9.74  | 9.95  |
| 1627330 at   | FBgn0032793             | 7.38  | 7.52  | 7.97  | 7.7   | 7.59  | 7.48  |
| 1626790 s at | FBgn0020440             | 7.12  | 7.25  | 6.93  | 7.23  | 7.01  | 7.32  |
| 1640541 at   | FBgn0005632             | 9.12  | 9.25  | 9.51  | 9.38  | 9.24  | 9.3   |
| 1639955 at   | FBgn0022720             | 8.66  | 8.79  | 8.83  | 8.93  | 9.04  | 9     |
| 1623837 at   | FBgn0031799             | 8.31  | 8.44  | 8.18  | 8.5   | 8.2   | 8.31  |
| 1624237 at   | FBgn0034400             | 8.54  | 8.67  | 8.64  | 8.56  | 8.5   | 8.56  |
| 1638259 s at | FBgn0027079             | 8.69  | 8.82  | 8.93  | 9.02  | 8.67  | 8.7   |
| 1631612 at   | FBgn0040009             | 9.03  | 9.16  | 8.63  | 9.14  | 9.18  | 9.16  |
| 1639576 at   | FBgn0004381             | 9.37  | 9.5   | 9.32  | 9.54  | 9.37  | 9.43  |
| 1626580 at   | FBgn0026309             | 8.53  | 8.66  | 8.75  | 8.72  | 8.57  | 8.63  |
| 1625978 at   | FBgn0032635             | 10.25 | 10.38 | 10.16 | 10.39 | 10.43 | 10.47 |
| 1624301 at   | FBgn0035637             | 9.5   | 9.63  | 9.52  | 9.73  | 9.54  | 9.63  |
| 1629121 at   | FBgn0032805             | 8.07  | 8.2   | 7.56  | 7.02  | 7.39  | 7.72  |
| 1629344 at   | FBgn0039355             | 7.78  | 7.91  | 7.51  | 7.85  | 7.79  | 7.97  |
| 1624176 at   | FBgn0035622             | 9.42  | 9.55  | 9.27  | 9.49  | 9.33  | 9.61  |
| 1632580 at   | FBgn0033813             | 7.95  | 8.08  | 7.76  | 8.48  | 8.11  | 8.24  |
| 1640980 at   | FBgn0038569             | 8.22  | 8.35  | 8.36  | 8.26  | 8.14  | 8.2   |
| 1628883 at   | ---                     | 9.29  | 9.42  | 9.45  | 9.53  | 9.33  | 9.39  |
| 1631543 at   | FBgn0027500 /// FBgn003 | 10.61 | 10.74 | 10.69 | 10.93 | 10.85 | 10.8  |
| 1632804 at   | FBgn0038584             | 9.47  | 9.6   | 9.69  | 10.02 | 9.65  | 9.62  |
| 1634122 at   | ---                     | 7.53  | 7.66  | 7.82  | 7.82  | 7.71  | 7.71  |
| 1635075 at   | ---                     | 9.2   | 9.33  | 9.64  | 9.65  | 9.39  | 9.44  |
| 1639856 at   | FBgn0032193             | 8.55  | 8.68  | 8.95  | 9.24  | 9.06  | 8.8   |

|              |                         |       |       |       |       |       |       |
|--------------|-------------------------|-------|-------|-------|-------|-------|-------|
| 1637959 at   | FBgn0038312             | 8.31  | 8.44  | 8.26  | 8.1   | 8.28  | 8.51  |
| 1641152 at   | FBgn0031170             | 7.24  | 7.37  | 6.86  | 7.13  | 7.14  | 7.09  |
| 1630445 at   | FBgn0010926             | 8.64  | 8.77  | 8.66  | 8.77  | 8.7   | 8.75  |
| 1639666 at   | ---                     | 6.93  | 7.06  | 7.36  | 7.48  | 7.14  | 7.24  |
| 1633975 s at | FBgn0033495             | 9.69  | 9.82  | 9.85  | 9.81  | 9.84  | 9.79  |
| 1634550 at   | FBgn0037657             | 8.89  | 9.02  | 9.04  | 9.07  | 8.84  | 8.87  |
| 1640743 at   | FBgn0000455             | 9.15  | 9.28  | 9.38  | 9.54  | 9.12  | 9.04  |
| 1641169 s at | FBgn0031836             | 10.28 | 10.41 | 10.42 | 10.38 | 10.33 | 10.41 |
| 1635537 at   | ---                     | 9.47  | 9.59  | 9.38  | 10.02 | 9.89  | 9.96  |
| 1638727 at   | ---                     | 10.74 | 10.87 | 11.02 | 10.82 | 10.5  | 10.75 |
| 1636142 at   | FBgn0030658             | 10.32 | 10.45 | 10.24 | 10.18 | 10.26 | 10.51 |
| 1638326 at   | FBgn0038619             | 8.35  | 8.48  | 8.29  | 8.64  | 8.39  | 8.47  |
| 1636157 at   | FBgn0035064             | 8.09  | 8.22  | 8.09  | 8.24  | 8.11  | 8.04  |
| 1623560 at   | FBgn0037435             | 7.9   | 8.03  | 8.04  | 8.08  | 8.11  | 8.3   |
| 1635214 at   | FBgn0002905             | 7.08  | 7.2   | 7.21  | 6.78  | 6.73  | 6.9   |
| 1623139 at   | ---                     | 7.26  | 7.39  | 7.34  | 7.57  | 7.32  | 7.24  |
| 1639367 a at | FBgn0033267             | 8.74  | 8.86  | 8.66  | 8.79  | 8.57  | 8.79  |
| 1625973 a at | FBgn0040373             | 9.37  | 9.5   | 9.13  | 9.41  | 9.41  | 9.5   |
| 1624385 at   | FBgn0037277             | 9.78  | 9.91  | 9.77  | 9.74  | 9.71  | 9.91  |
| 1629074 a at | FBgn0036640             | 8.18  | 8.31  | 8.03  | 7.41  | 7.9   | 7.85  |
| 1640512 at   | FBgn0028997             | 8.62  | 8.74  | 8.62  | 9.01  | 9.09  | 9.11  |
| 1625640 a at | FBgn0039465             | 10.29 | 10.42 | 10.4  | 10.54 | 10.43 | 10.52 |
| 1638795 at   | FBgn0034367             | 7.96  | 8.09  | 8.06  | 8.59  | 8.12  | 8.03  |
| 1631288 at   | FBgn0030314             | 8.99  | 9.12  | 8.99  | 9.21  | 9.02  | 8.9   |
| 1627319 at   | FBgn0029927             | 7.61  | 7.74  | 8.8   | 8.05  | 7.53  | 7.61  |
| 1626263 at   | FBgn0036741             | 7.69  | 7.82  | 7.7   | 7.93  | 7.7   | 7.8   |
| 1628892 s at | FBgn0036305             | 8.83  | 8.96  | 8.7   | 8.93  | 9.05  | 9.07  |
| 1638230 at   | FBgn0029789             | 7.4   | 7.53  | 7.1   | 7.38  | 7.62  | 7.46  |
| 1634219 a at | ---                     | 13.01 | 13.13 | 13.05 | 13.23 | 13.08 | 13.16 |
| 1626620 at   | FBgn0027378             | 9.37  | 9.49  | 9.34  | 9.48  | 9.45  | 9.5   |
| 1640190 at   | FBgn0035195             | 9.39  | 9.52  | 9.71  | 9.65  | 9.7   | 9.65  |
| 1628424 at   | FBgn0039385             | 9.55  | 9.68  | 9.43  | 9.75  | 9.72  | 9.71  |
| 1628755 at   | FBgn0037567             | 7.33  | 7.45  | 7.49  | 7.53  | 7.1   | 7.05  |
| 1625757 at   | FBgn0051329 /// FBgn005 | 8.96  | 9.09  | 8.81  | 9.15  | 9.27  | 9.3   |
| 1635186 at   | FBgn0036341             | 9.73  | 9.86  | 9.53  | 9.86  | 9.68  | 9.85  |
| 1627614 at   | FBgn0033992             | 9.55  | 9.67  | 9.58  | 9.78  | 9.35  | 9.58  |

|              |             |       |       |       |       |       |       |
|--------------|-------------|-------|-------|-------|-------|-------|-------|
| 1641269 at   | FBgn0028895 | 7.79  | 7.92  | 7.76  | 7.94  | 7.81  | 7.93  |
| 1626885 at   | FBgn0030292 | 9.32  | 9.45  | 9.64  | 9.52  | 9.64  | 9.6   |
| 1636806 at   | ---         | 9.18  | 9.31  | 9.01  | 9.06  | 9.31  | 9.35  |
| 1637862 at   | FBgn0038301 | 7.61  | 7.74  | 7.7   | 7.91  | 7.92  | 7.84  |
| 1636730 at   | FBgn0029522 | 9.12  | 9.25  | 9.34  | 9.8   | 9.31  | 9.29  |
| 1633274 at   | FBgn0031871 | 9.29  | 9.42  | 9.41  | 9.59  | 9.52  | 9.62  |
| 1641256 at   | FBgn0036691 | 8.89  | 9.02  | 9.17  | 9.27  | 8.9   | 8.84  |
| 1629441 at   | FBgn0036688 | 7.97  | 8.1   | 7.85  | 8.47  | 8.35  | 8.27  |
| 1629767 s at | FBgn0004603 | 10.01 | 10.13 | 10.08 | 9.87  | 9.84  | 10.09 |
| 1639289 at   | ---         | 7.54  | 7.67  | 7.33  | 7.51  | 7.55  | 7.53  |
| 1637091 a at | FBgn0037236 | 10.49 | 10.62 | 10.46 | 10.53 | 10.6  | 10.64 |
| 1625962 at   | FBgn0003276 | 9.69  | 9.82  | 10.16 | 10.5  | 10.05 | 9.86  |
| 1635117 at   | FBgn0001079 | 8.89  | 9.01  | 8.65  | 8.95  | 8.99  | 8.97  |
| 1625394 at   | ---         | 10.68 | 10.81 | 10.85 | 10.71 | 10.81 | 10.75 |
| 1632464 at   | FBgn0039260 | 9.16  | 9.29  | 8.95  | 9.1   | 9.39  | 9.28  |
| 1634606 a at | FBgn0027501 | 9.49  | 9.61  | 9.42  | 9.58  | 9.46  | 9.46  |
| 1641461 at   | FBgn0028486 | 8.34  | 8.47  | 8.21  | 8.28  | 8.45  | 8.42  |
| 1638127 s at | FBgn0030276 | 10.63 | 10.76 | 10.54 | 10.61 | 10.65 | 10.7  |
| 1627966 s at | FBgn0034269 | 8.61  | 8.73  | 8.66  | 8.76  | 8.83  | 8.8   |
| 1640889 at   | FBgn0030786 | 9.92  | 10.04 | 10.1  | 10.21 | 9.98  | 9.88  |
| 1632711 at   | FBgn0035233 | 8.88  | 9.01  | 8.85  | 9.43  | 9.06  | 8.99  |
| 1640808 at   | FBgn0034528 | 9.04  | 9.17  | 9.06  | 9     | 8.8   | 9.1   |
| 1632049 at   | FBgn0032168 | 8.42  | 8.55  | 8.35  | 8.6   | 8.46  | 8.44  |
| 1639714 at   | FBgn0001276 | 8.02  | 8.15  | 7.83  | 8.17  | 8.16  | 8.23  |
| 1634330 at   | FBgn0002926 | 8.55  | 8.68  | 8.77  | 7.6   | 7.18  | 8.77  |
| 1624407 s at | FBgn0015509 | 11.17 | 11.3  | 11.34 | 11.4  | 11.29 | 11.3  |
| 1626217 at   | FBgn0016672 | 9.52  | 9.64  | 9.26  | 9.22  | 9.36  | 9.48  |
| 1639599 at   | FBgn0031318 | 8.04  | 8.17  | 8.02  | 7.82  | 7.92  | 8     |
| 1631101 at   | FBgn0036964 | 8.57  | 8.7   | 8.78  | 8.8   | 8.7   | 8.8   |
| 1627183 at   | FBgn0015351 | 7.33  | 7.45  | 7.47  | 7.57  | 7.72  | 7.7   |
| 1640871 at   | FBgn0025865 | 8.45  | 8.58  | 8.56  | 8.25  | 8.57  | 8.72  |
| 1635703 s at | FBgn0013576 | 9.75  | 9.88  | 9.89  | 10.1  | 9.72  | 9.99  |
| 1625943 at   | FBgn0038834 | 8.11  | 8.24  | 8.44  | 8.23  | 8.35  | 8.53  |
| 1634311 at   | FBgn0030581 | 7.6   | 7.73  | 7.5   | 7.79  | 7.9   | 8.05  |
| 1627700 at   | FBgn0039451 | 7.9   | 8.02  | 7.74  | 7.96  | 7.99  | 7.96  |
| 1629352 at   | FBgn0010851 | 9.83  | 9.95  | 9.91  | 9.74  | 9.83  | 10.02 |

|              |             |       |       |       |       |       |       |
|--------------|-------------|-------|-------|-------|-------|-------|-------|
| 1641420 s at | FBgn0037297 | 8.65  | 8.78  | 8.6   | 8.89  | 8.77  | 8.73  |
| 1633501 s at | FBgn0004889 | 8.45  | 8.58  | 8.84  | 8.97  | 8.16  | 8.66  |
| 1640088 at   | FBgn0027090 | 9.61  | 9.73  | 9.73  | 9.7   | 9.77  | 9.6   |
| 1623353 at   | ---         | 7.97  | 8.1   | 8.26  | 8.33  | 7.95  | 7.99  |
| 1641295 s at | FBgn0022268 | 10.74 | 10.86 | 11.01 | 11.08 | 10.78 | 10.85 |
| 1638204 s at | FBgn0026257 | 9.24  | 9.36  | 9.35  | 9.64  | 9.38  | 9.37  |
| 1639138 at   | FBgn0039164 | 8.98  | 9.11  | 9.03  | 9.3   | 9.26  | 9.18  |
| 1639826 at   | FBgn0052662 | 8.11  | 8.23  | 8.18  | 7.68  | 7.83  | 8.09  |
| 1639118 a at | ---         | 11.29 | 11.41 | 11.49 | 11.13 | 11.4  | 11.56 |
| 1633791 at   | FBgn0031280 | 8.66  | 8.78  | 8.7   | 8.82  | 8.56  | 8.57  |
| 1631919 at   | FBgn0031243 | 9.07  | 9.19  | 8.98  | 9.11  | 9.07  | 9.09  |
| 1633138 at   | FBgn0052251 | 8.12  | 8.24  | 8.16  | 8.24  | 8.22  | 8.13  |
| 1640313 s at | FBgn0019925 | 10.39 | 10.51 | 10.47 | 10.47 | 10.36 | 10.46 |
| 1627148 at   | ---         | 9.46  | 9.58  | 9.69  | 9.63  | 9.53  | 9.49  |
| 1635861 a at | FBgn0032586 | 9.3   | 9.42  | 9.73  | 9.82  | 9.5   | 9.45  |
| 1631597 at   | FBgn0038197 | 7.84  | 7.96  | 8.21  | 8.07  | 7.94  | 8.01  |
| 1635454 a at | FBgn0037968 | 7.02  | 7.14  | 6.87  | 7.33  | 7.36  | 7.23  |
| 1641033 a at | ---         | 7.43  | 7.55  | 6.98  | 7.5   | 7.43  | 7.64  |
| 1624429 at   | FBgn0035989 | 8.73  | 8.85  | 8.78  | 8.93  | 8.66  | 8.73  |
| 1641024 at   | ---         | 8.52  | 8.64  | 8.56  | 8.79  | 8.61  | 8.58  |
| 1627897 at   | FBgn0038489 | 9.41  | 9.53  | 9.35  | 9.88  | 9.74  | 9.74  |
| 1629866 at   | FBgn0025639 | 9.64  | 9.76  | 9.28  | 9.46  | 9.6   | 9.77  |
| 1632136 at   | FBgn0039696 | 7.64  | 7.76  | 7.66  | 7.83  | 7.74  | 7.81  |
| 1629918 at   | FBgn0033859 | 8.07  | 8.2   | 8.27  | 8.3   | 8.16  | 8.18  |
| 1626096 at   | FBgn0038471 | 9.67  | 9.79  | 10.04 | 10.32 | 9.88  | 9.95  |
| 1627142 at   | FBgn0037530 | 9.37  | 9.49  | 9.51  | 9.51  | 9.4   | 9.47  |
| 1627688 at   | FBgn0034268 | 9.15  | 9.27  | 9.1   | 9.43  | 9.2   | 9.3   |
| 1636870 at   | FBgn0037620 | 7.76  | 7.88  | 7.75  | 8.19  | 8.01  | 8.07  |
| 1627908 at   | FBgn0037149 | 8.71  | 8.83  | 8.61  | 8.73  | 8.85  | 8.95  |
| 1625095 at   | FBgn0037533 | 11.73 | 11.85 | 11.93 | 11.91 | 11.68 | 11.72 |
| 1636092 a at | FBgn0004655 | 10.07 | 10.19 | 10.02 | 10.21 | 10.16 | 10.21 |
| 1632791 at   | FBgn0052479 | 10.27 | 10.39 | 10.26 | 10.21 | 10.3  | 10.49 |
| 1640161 at   | ---         | 9.06  | 9.18  | 9.21  | 9.48  | 9.29  | 9.16  |
| 1641563 at   | FBgn0037718 | 9.72  | 9.84  | 9.88  | 10.14 | 9.69  | 9.72  |
| 1624743 s at | FBgn0005777 | 10    | 10.12 | 9.96  | 10.03 | 9.87  | 9.94  |
| 1623203 at   | FBgn0032258 | 8.74  | 8.87  | 9.22  | 9.4   | 9.17  | 8.92  |



|              |                         |       |       |       |       |       |       |
|--------------|-------------------------|-------|-------|-------|-------|-------|-------|
| 1641644 s at | FBgn0000376             | 9.2   | 9.32  | 8.57  | 8.87  | 8.97  | 9.07  |
| 1635681 at   | FBgn0029935             | 8.89  | 9.01  | 8.63  | 8.75  | 8.83  | 8.9   |
| 1623549 at   | FBgn0039692             | 8.14  | 8.26  | 7.89  | 7.97  | 8.03  | 8.09  |
| 1636866 at   | FBgn0038856             | 8.72  | 8.84  | 8.85  | 9.06  | 8.71  | 8.79  |
| 1635466 at   | FBgn0011327             | 10.1  | 10.22 | 10.39 | 10.67 | 10.04 | 10.13 |
| 1624328 a at | FBgn0011710             | 8.53  | 8.65  | 8.62  | 8.47  | 8.54  | 8.6   |
| 1625793 at   | FBgn0015664             | 9.54  | 9.66  | 9.79  | 9.94  | 9.71  | 9.66  |
| 1624312 at   | FBgn0031519             | 7.37  | 7.49  | 7.26  | 7.92  | 7.88  | 7.93  |
| 1637673 at   | FBgn0038722             | 9.16  | 9.28  | 9.23  | 9.51  | 9.19  | 9.17  |
| 1630827 s at | ---                     | 7.55  | 7.66  | 7.31  | 7.13  | 7.21  | 7.76  |
| 1632273 at   | FBgn0039207             | 9.02  | 9.14  | 9.37  | 9.05  | 8.93  | 9.32  |
| 1640127 at   | FBgn0036402             | 8.45  | 8.57  | 8.69  | 8.89  | 8.61  | 8.7   |
| 1630000 at   | FBgn0030974             | 7.73  | 7.85  | 7.8   | 8.07  | 8     | 7.89  |
| 1627999 s at | FBgn0014127             | 9.14  | 9.26  | 9.19  | 9.55  | 9.51  | 9.27  |
| 1629933 at   | FBgn0029755             | 9.55  | 9.66  | 9.75  | 9.51  | 9.58  | 9.65  |
| 1632782 a at | FBgn0038611 /// FBgn003 | 8.04  | 8.16  | 8.66  | 6.69  | 6.85  | 8.36  |
| 1624555 at   | FBgn0004510             | 9.25  | 9.37  | 9.16  | 9.2   | 9.2   | 9.36  |
| 1640421 at   | FBgn0036099             | 10.59 | 10.71 | 10.47 | 10.49 | 10.52 | 10.68 |
| 1628309 at   | FBgn0031320             | 8.02  | 8.13  | 8.49  | 8.29  | 8.17  | 8.23  |
| 1634081 at   | FBgn0027894             | 10.45 | 10.57 | 10.64 | 11.01 | 10.68 | 10.53 |
| 1637468 at   | FBgn0028529             | 8.11  | 8.22  | 8.64  | 8.69  | 8.45  | 8.46  |
| 1628335 at   | FBgn0036570             | 7.65  | 7.76  | 7.91  | 8.08  | 7.75  | 7.73  |
| 1637003 at   | FBgn0029733             | 10.8  | 10.91 | 10.58 | 10.84 | 10.9  | 10.92 |
| 1640948 at   | FBgn0036728             | 9.99  | 10.11 | 10.23 | 10.18 | 10.13 | 10.22 |
| 1638499 s at | FBgn0033929             | 9.08  | 9.2   | 9.22  | 9.39  | 9.39  | 9.18  |
| 1641341 at   | FBgn0031304             | 8.03  | 8.15  | 8.13  | 8.37  | 8.23  | 8.26  |
| 1633234 at   | FBgn0031266             | 8.7   | 8.82  | 8.93  | 8.92  | 8.92  | 8.8   |
| 1640701 at   | FBgn0038737             | 8.16  | 8.28  | 8.22  | 8.38  | 8.19  | 8.33  |
| 1641069 at   | FBgn0037881             | 7.87  | 7.99  | 8.07  | 8.2   | 8.02  | 7.88  |
| 1623956 at   | FBgn0024251             | 9.33  | 9.45  | 9.82  | 9.58  | 9.46  | 9.42  |
| 1624419 a at | FBgn0010621             | 12.23 | 12.35 | 12.4  | 12.32 | 12.2  | 12.19 |
| 1628342 s at | FBgn0027889             | 9.32  | 9.43  | 9.68  | 9.72  | 9.66  | 9.45  |
| 1626679 at   | FBgn0038107             | 9.78  | 9.9   | 9.62  | 10    | 9.81  | 9.89  |
| 1626787 s at | FBgn0038462             | 10.82 | 10.94 | 10.85 | 10.69 | 11.11 | 11.01 |
| 1625109 at   | FBgn0004584             | 10.01 | 10.12 | 10    | 9.97  | 10.06 | 10.05 |
| 1634270 at   | FBgn0032222             | 10.19 | 10.3  | 10.06 | 10.18 | 10.08 | 10.11 |

|              |                         |       |       |       |       |       |       |
|--------------|-------------------------|-------|-------|-------|-------|-------|-------|
| 1626153 at   | FBgn0003600             | 8.21  | 8.32  | 8.37  | 8.64  | 8.32  | 8.18  |
| 1629221 at   | FBgn0027609             | 8.26  | 8.38  | 8.01  | 8.4   | 8.43  | 8.36  |
| 1625723 at   | FBgn0037920             | 8.41  | 8.53  | 8.34  | 8.53  | 8.67  | 8.78  |
| 1624447 s at | ---                     | 10.87 | 10.98 | 10.73 | 10.82 | 10.82 | 11.02 |
| 1639309 at   | FBgn0038617             | 8.63  | 8.75  | 8.5   | 8.67  | 8.7   | 8.7   |
| 1640252 at   | FBgn0038319             | 9.23  | 9.35  | 9.52  | 9.53  | 9.36  | 9.4   |
| 1635153 at   | FBgn0039580             | 9.26  | 9.38  | 9.4   | 9.11  | 9.05  | 9.19  |
| 1625684 at   | FBgn0037156             | 9.63  | 9.75  | 9.35  | 9.47  | 9.61  | 9.6   |
| 1635947 at   | FBgn0040529             | 11.52 | 11.64 | 11.88 | 11.6  | 11.61 | 11.74 |
| 1624637 at   | ---                     | 7.59  | 7.71  | 7.79  | 7.95  | 7.77  | 7.71  |
| 1640455 a at | FBgn0038421             | 11.41 | 11.52 | 11.5  | 11.57 | 11.84 | 11.9  |
| 1641063 s at | FBgn0032123             | 8.56  | 8.67  | 8.55  | 8.69  | 8.76  | 8.93  |
| 1626460 at   | FBgn0024992             | 9.58  | 9.7   | 9.65  | 9.61  | 9.59  | 9.58  |
| 1640673 at   | FBgn0026400             | 10.87 | 10.98 | 10.97 | 10.91 | 10.85 | 10.89 |
| 1630839 at   | FBgn0014411             | 9.76  | 9.88  | 9.87  | 9.91  | 9.77  | 9.99  |
| 1632790 at   | FBgn0033051             | 7.34  | 7.45  | 6.83  | 6.88  | 7.09  | 6.9   |
| 1636949 s at | FBgn0033062             | 9.57  | 9.69  | 9.43  | 9.48  | 9.72  | 9.84  |
| 1625851 s at | FBgn0005776             | 10.4  | 10.51 | 10.52 | 10.87 | 10.58 | 10.46 |
| 1641630 at   | ---                     | 10.08 | 10.2  | 10.13 | 10.27 | 10.21 | 10.12 |
| 1631615 at   | FBgn0026433             | 8.78  | 8.89  | 8.61  | 9.09  | 8.8   | 8.81  |
| 1623520 a at | FBgn0032698             | 8.76  | 8.88  | 8.61  | 8.96  | 8.92  | 8.79  |
| 1628201 at   | FBgn0025630             | 8.5   | 8.62  | 8.53  | 8.84  | 8.58  | 8.63  |
| 1630885 at   | FBgn0031068             | 9.43  | 9.54  | 9.31  | 9.22  | 9.46  | 9.49  |
| 1640679 at   | FBgn0033688             | 9.92  | 10.04 | 9.92  | 9.87  | 9.86  | 9.97  |
| 1623350 at   | FBgn0010398             | 8.2   | 8.32  | 8.05  | 8.27  | 8.3   | 8.4   |
| 1631536 at   | FBgn0040465             | 6.85  | 6.97  | 6.81  | 7.45  | 7.48  | 7.6   |
| 1637100 at   | FBgn0004856             | 9.79  | 9.91  | 9.91  | 9.93  | 9.81  | 9.85  |
| 1637249 at   | FBgn0032846             | 7.81  | 7.92  | 8.01  | 7.92  | 7.71  | 7.61  |
| 1636722 at   | ---                     | 9.31  | 9.42  | 9.56  | 9.35  | 9.33  | 9.46  |
| 1639349 at   | FBgn0030864             | 10.24 | 10.35 | 10.19 | 10.52 | 10.49 | 10.49 |
| 1632557 s at | FBgn0031882             | 8.39  | 8.5   | 8.32  | 8.82  | 8.59  | 8.75  |
| 1634150 s at | FBgn0015239             | 9.66  | 9.77  | 9.68  | 9.78  | 9.77  | 9.82  |
| 1640929 at   | FBgn0036734             | 7.53  | 7.64  | 7.71  | 7.83  | 7.68  | 7.59  |
| 1635003 at   | FBgn0027526             | 9.9   | 10.01 | 9.9   | 10.23 | 10.03 | 9.99  |
| 1630187 a at | FBgn0030640 /// FBgn003 | 8.32  | 8.43  | 8.17  | 8.21  | 8.17  | 8.02  |
| 1631045 a at | FBgn0037978             | 7.72  | 7.83  | 7.7   | 8.26  | 7.96  | 7.87  |

|              |                         |       |       |       |       |       |       |
|--------------|-------------------------|-------|-------|-------|-------|-------|-------|
| 1634918 a at | ---                     | 11.95 | 12.07 | 12.01 | 11.7  | 11.89 | 12.11 |
| 1638236 at   | FBgn0032514             | 9.18  | 9.29  | 9.48  | 9.58  | 9.31  | 9.33  |
| 1635649 at   | ---                     | 8.89  | 9     | 9.01  | 9.25  | 9.07  | 9.02  |
| 1638732 at   | ---                     | 8.5   | 8.61  | 8.55  | 8.27  | 8.58  | 8.56  |
| 1632117 s at | FBgn0004145             | 12.4  | 12.51 | 12.23 | 12.44 | 12.45 | 12.51 |
| 1623739 at   | FBgn0011341             | 11.43 | 11.54 | 11.88 | 11.64 | 11.55 | 11.69 |
| 1629285 at   | FBgn0037568             | 9.56  | 9.67  | 9.66  | 9.96  | 9.89  | 9.8   |
| 1624518 at   | FBgn0025640             | 8.97  | 9.08  | 9.2   | 9.04  | 9.22  | 9.22  |
| 1641693 s at | FBgn0052158             | 8.5   | 8.61  | 9.34  | 9.69  | 8.73  | 8.72  |
| 1625444 at   | FBgn0042092             | 9.35  | 9.47  | 9.55  | 9.68  | 9.63  | 9.69  |
| 1637356 a at | ---                     | 7.79  | 7.9   | 7.71  | 7.87  | 7.89  | 7.77  |
| 1624118 at   | FBgn0015793             | 8.93  | 9.04  | 8.81  | 8.97  | 8.98  | 9.11  |
| 1638285 a at | FBgn0025592             | 8.52  | 8.63  | 8.6   | 8.7   | 8.44  | 8.35  |
| 1623518 s at | FBgn0051305 /// FBgn003 | 10.55 | 10.66 | 10.79 | 10.29 | 10.52 | 10.61 |
| 1629170 s at | FBgn0015844             | 8.58  | 8.69  | 8.63  | 8.9   | 8.61  | 8.68  |
| 1633003 at   | ---                     | 9.62  | 9.73  | 9.93  | 9.8   | 9.72  | 9.7   |
| 1622903 s at | FBgn0030330             | 9     | 9.11  | 8.81  | 8.86  | 9.05  | 9.13  |
| 1641652 a at | ---                     | 9.85  | 9.96  | 9.61  | 9.5   | 9.72  | 10    |
| 1625170 at   | FBgn0035268             | 7.79  | 7.91  | 7.99  | 8.06  | 8.05  | 7.86  |
| 1640356 a at | FBgn0035586             | 7.22  | 7.33  | 6.74  | 6.76  | 7.3   | 7.32  |
| 1627032 a at | FBgn0027602             | 8.35  | 8.46  | 8.65  | 8.7   | 8.07  | 8.21  |
| 1641259 at   | FBgn0013763             | 10.73 | 10.84 | 10.46 | 10.69 | 10.76 | 10.8  |
| 1628006 at   | ---                     | 11.13 | 11.24 | 11.28 | 11.33 | 11.16 | 11.19 |
| 1637682 at   | FBgn0026318             | 8.91  | 9.02  | 8.96  | 9.03  | 8.68  | 9.05  |
| 1632394 s at | FBgn0031674             | 10.66 | 10.77 | 10.71 | 10.72 | 10.8  | 10.88 |
| 1623485 at   | ---                     | 8.15  | 8.27  | 8.24  | 8.64  | 8.57  | 8.41  |
| 1641379 a at | FBgn0039955             | 10.44 | 10.56 | 10.27 | 10.35 | 10.41 | 10.43 |
| 1623595 at   | FBgn0032476             | 9.11  | 9.22  | 8.93  | 9.14  | 9.22  | 9.27  |
| 1632406 at   | FBgn0031766             | 7.18  | 7.29  | 7.01  | 7.43  | 7.33  | 7.27  |
| 1625260 at   | FBgn0030346             | 9.41  | 9.52  | 9.29  | 9.66  | 9.57  | 9.58  |
| 1636156 at   | FBgn0036522             | 9.18  | 9.29  | 9.13  | 9.26  | 9.09  | 9.5   |
| 1640495 at   | FBgn0010282             | 9.61  | 9.72  | 9.72  | 9.72  | 9.79  | 9.82  |
| 1637956 s at | FBgn0045862             | 8.95  | 9.06  | 8.97  | 9.16  | 9.14  | 9.15  |
| 1625923 s at | FBgn0024753             | 8.35  | 8.46  | 8.23  | 8.63  | 8.11  | 8.34  |
| 1628194 at   | FBgn0023529             | 10.06 | 10.17 | 10.45 | 10.24 | 9.98  | 10.15 |
| 1629759 at   | FBgn0042138             | 9.72  | 9.83  | 10.03 | 10.02 | 9.94  | 10.01 |

|              |                         |       |       |       |       |       |       |
|--------------|-------------------------|-------|-------|-------|-------|-------|-------|
| 1633362 at   | FBgn0038424             | 8.62  | 8.73  | 8.53  | 8.76  | 8.7   | 8.72  |
| 1639482 a at | FBgn0052549             | 8.67  | 8.78  | 8.66  | 8.7   | 8.66  | 8.47  |
| 1627830 at   | FBgn0022981             | 10.63 | 10.74 | 10.73 | 10.83 | 10.9  | 10.88 |
| 1623785 a at | FBgn0003041             | 10.39 | 10.5  | 10.41 | 10.39 | 10.59 | 10.59 |
| 1635367 at   | FBgn0004656             | 7.97  | 8.08  | 8.17  | 8     | 7.79  | 8.09  |
| 1641529 s at | FBgn0037081             | 8.59  | 8.7   | 8.72  | 8.7   | 8.9   | 8.7   |
| 1636986 at   | FBgn0001986             | 8.53  | 8.65  | 8.87  | 8.85  | 8.67  | 8.62  |
| 1636289 s at | ---                     | 7.3   | 7.41  | 7.34  | 7.44  | 7.01  | 7.09  |
| 1634300 at   | FBgn0025624             | 7.49  | 7.6   | 7.15  | 6.85  | 7.41  | 7.35  |
| 1637004 at   | FBgn0033988             | 9.37  | 9.48  | 9.71  | 9.56  | 9.36  | 9.32  |
| 1627738 a at | FBgn0002775             | 8.82  | 8.93  | 8.83  | 8.91  | 9.04  | 8.97  |
| 1630086 at   | FBgn0029857             | 8.86  | 8.97  | 8.78  | 8.76  | 8.75  | 8.91  |
| 1629372 a at | FBgn0028538             | 8.75  | 8.86  | 8.52  | 8.51  | 8.75  | 8.8   |
| 1633954 at   | FBgn0038425             | 8.06  | 8.17  | 8.19  | 8.34  | 8.25  | 8.16  |
| 1626968 at   | ---                     | 9.59  | 9.7   | 9.74  | 10.05 | 9.7   | 9.72  |
| 1633980 at   | FBgn0035440             | 8.38  | 8.49  | 8.44  | 8.6   | 8.44  | 8.59  |
| 1635181 at   | FBgn0038871             | 8.21  | 8.32  | 8.56  | 8.91  | 8.31  | 8.35  |
| 1628834 a at | FBgn0020615             | 11.08 | 11.19 | 10.97 | 11.12 | 11.26 | 11.43 |
| 1634683 at   | FBgn0011648             | 10.08 | 10.19 | 10.19 | 10.42 | 10.07 | 10.35 |
| 1635969 at   | ---                     | 9.03  | 9.14  | 9.45  | 9.55  | 9.41  | 9.44  |
| 1631591 at   | FBgn0051935             | 6.88  | 6.99  | 7.08  | 7.46  | 7.06  | 7.04  |
| 1629234 at   | FBgn0053104 /// FBgn005 | 10.56 | 10.67 | 10.75 | 10.58 | 10.56 | 10.81 |
| 1631637 a at | FBgn0015623             | 10.73 | 10.84 | 10.49 | 10.71 | 10.69 | 10.66 |
| 1636401 a at | FBgn0020392             | 10.9  | 11.01 | 10.97 | 10.93 | 10.94 | 10.9  |
| 1630941 s at | FBgn0003360             | 13.1  | 13.21 | 13.38 | 13.32 | 12.97 | 13.11 |
| 1623498 at   | FBgn0039125             | 9.46  | 9.57  | 9.24  | 9.57  | 9.53  | 9.54  |
| 1638237 at   | FBgn0038806             | 8.3   | 8.41  | 8.12  | 8.12  | 8.15  | 8.3   |
| 1636064 at   | FBgn0037373             | 8.63  | 8.74  | 8.71  | 8.8   | 8.68  | 8.64  |
| 1639783 s at | FBgn0005649             | 10.88 | 10.99 | 10.91 | 10.89 | 10.75 | 11.1  |
| 1632251 s at | FBgn0032340             | 9.54  | 9.65  | 9.81  | 9.79  | 9.61  | 9.6   |
| 1630550 a at | FBgn0032656             | 8.82  | 8.93  | 8.54  | 8.7   | 8.61  | 8.93  |
| 1630805 at   | FBgn0014366             | 9.61  | 9.72  | 9.91  | 9.92  | 9.86  | 9.85  |
| 1626607 at   | FBgn0035771             | 9.78  | 9.89  | 9.91  | 10.04 | 9.85  | 9.94  |
| 1625290 at   | ---                     | 11.98 | 12.09 | 12.16 | 12.17 | 12.02 | 12.19 |
| 1634565 at   | FBgn0032205             | 8.66  | 8.77  | 8.87  | 9.52  | 8.96  | 9.04  |
| 1633740 at   | FBgn0030066             | 7.66  | 7.77  | 7.48  | 7.9   | 7.62  | 7.72  |

|              |                         |       |       |       |       |       |       |
|--------------|-------------------------|-------|-------|-------|-------|-------|-------|
| 1625683 at   | FBgn0039341             | 9.81  | 9.92  | 9.88  | 9.57  | 9.69  | 9.94  |
| 1636781 at   | FBgn0033187             | 8.63  | 8.73  | 8.81  | 8.54  | 8.52  | 8.66  |
| 1632565 at   | ---                     | 10.34 | 10.45 | 10.28 | 10.37 | 10.54 | 10.56 |
| 1628869 s at | FBgn0039733             | 8.43  | 8.54  | 8.1   | 8.48  | 8.55  | 8.56  |
| 1630551 at   | FBgn0036772             | 7.94  | 8.04  | 8.33  | 8.37  | 7.82  | 8.04  |
| 1631425 at   | FBgn0036887             | 10.71 | 10.82 | 10.46 | 11.18 | 10.86 | 10.7  |
| 1637816 s at | FBgn0003738             | 12.56 | 12.66 | 12.48 | 12.64 | 12.7  | 12.61 |
| 1636353 s at | FBgn0037612             | 9.43  | 9.54  | 9.16  | 9.47  | 9.43  | 9.33  |
| 1640194 a at | FBgn0040057             | 10.73 | 10.83 | 10.97 | 10.95 | 10.78 | 10.94 |
| 1637262 at   | FBgn0038636             | 8.31  | 8.41  | 8.62  | 8.86  | 8.59  | 8.4   |
| 1638737 at   | FBgn0030687             | 8.63  | 8.74  | 8.74  | 8.84  | 8.7   | 8.61  |
| 1638371 at   | FBgn0051849             | 7.62  | 7.73  | 7.66  | 8     | 7.8   | 7.75  |
| 1633301 at   | FBgn0031229             | 10.18 | 10.29 | 10.35 | 10.46 | 10.33 | 10.4  |
| 1629039 at   | FBgn0034793             | 9.73  | 9.83  | 9.65  | 9.88  | 9.56  | 9.71  |
| 1627861 s at | FBgn0010548             | 8.27  | 8.38  | 8.26  | 8.32  | 8.3   | 8.19  |
| 1638318 at   | FBgn0033994             | 8.31  | 8.41  | 7.88  | 7.98  | 8.13  | 8.43  |
| 1630753 at   | FBgn0030115 /// FBgn003 | 9.34  | 9.44  | 9.21  | 9.49  | 9.43  | 9.51  |
| 1625617 at   | ---                     | 9.74  | 9.85  | 10    | 10.02 | 10.04 | 9.95  |
| 1636122 at   | FBgn0030869             | 8.59  | 8.69  | 8.71  | 8.74  | 8.72  | 8.69  |
| 1634243 a at | FBgn0039348             | 10.05 | 10.16 | 10.21 | 10.15 | 10.15 | 10.01 |
| 1640842 at   | FBgn0032190             | 10.38 | 10.49 | 10.37 | 10.56 | 10.46 | 10.5  |
| 1641510 at   | FBgn0021796             | 8.98  | 9.09  | 9     | 9.19  | 9.17  | 9.01  |
| 1630101 s at | FBgn0024308             | 9.28  | 9.38  | 9.08  | 8.97  | 9.21  | 9.2   |
| 1640504 at   | FBgn0040521             | 8.35  | 8.46  | 8.76  | 8.88  | 8.71  | 8.7   |
| 1623673 at   | FBgn0037539             | 8.05  | 8.16  | 7.86  | 8.12  | 8.24  | 8.15  |
| 1633249 at   | ---                     | 8.42  | 8.53  | 8.54  | 8.49  | 8.55  | 8.53  |
| 1628241 at   | FBgn0032873             | 9.16  | 9.27  | 9.31  | 9.67  | 9.27  | 9.25  |
| 1639097 at   | FBgn0000927             | 10.62 | 10.73 | 10.45 | 10.79 | 10.75 | 10.71 |
| 1636052 at   | FBgn0001612             | 9     | 9.11  | 9.03  | 9.24  | 9.06  | 9.08  |
| 1640395 a at | FBgn0016794             | 10.31 | 10.41 | 10.5  | 10.59 | 10.32 | 10.39 |
| 1627828 s at | FBgn0005654             | 8.34  | 8.44  | 8.45  | 8.72  | 8.53  | 8.35  |
| 1634854 at   | FBgn0025621             | 7.94  | 8.04  | 7.84  | 8.08  | 8     | 7.82  |
| 1630018 at   | FBgn0003480             | 8.77  | 8.87  | 8.31  | 8.98  | 8.82  | 8.8   |
| 1640761 at   | FBgn0028648             | 9.11  | 9.22  | 9.4   | 9.3   | 9.26  | 9.25  |
| 1636727 at   | FBgn0030790             | 10.19 | 10.29 | 9.87  | 10.17 | 10.17 | 10.41 |
| 1639215 at   | FBgn0024994             | 9.94  | 10.05 | 9.69  | 9.64  | 9.72  | 10.03 |

|              |             |       |       |       |       |       |       |
|--------------|-------------|-------|-------|-------|-------|-------|-------|
| 1624186 at   | FBgn0036028 | 8.38  | 8.49  | 8.22  | 8.64  | 8.64  | 8.64  |
| 1636513 a at | FBgn0001309 | 9.23  | 9.34  | 9.45  | 8.94  | 9.17  | 9.63  |
| 1636068 a at | FBgn0046812 | 9.77  | 9.87  | 9.97  | 9.56  | 9.67  | 9.76  |
| 1636038 at   | FBgn0037299 | 9.12  | 9.22  | 8.94  | 8.81  | 8.92  | 9.13  |
| 1634157 at   | FBgn0025463 | 10.62 | 10.73 | 10.6  | 11.09 | 10.81 | 10.7  |
| 1631513 at   | ---         | 10.42 | 10.52 | 10.44 | 10.6  | 10.67 | 10.67 |
| 1628804 at   | FBgn0034231 | 8.81  | 8.91  | 8.9   | 8.79  | 8.93  | 9.04  |
| 1638923 at   | ---         | 10.81 | 10.91 | 10.42 | 10.61 | 10.54 | 10.6  |
| 1626591 at   | FBgn0052434 | 8.75  | 8.85  | 8.64  | 8.63  | 8.74  | 8.77  |
| 1635407 at   | FBgn0052772 | 8.7   | 8.81  | 8.78  | 8.82  | 8.63  | 8.75  |
| 1627141 at   | FBgn0039710 | 9.44  | 9.55  | 9.29  | 9.51  | 9.68  | 9.57  |
| 1632288 at   | FBgn0026143 | 9.76  | 9.87  | 9.82  | 10.08 | 9.89  | 9.82  |
| 1623449 at   | FBgn0032014 | 11.88 | 11.98 | 11.84 | 12.09 | 11.88 | 11.93 |
| 1640151 at   | FBgn0033898 | 8.74  | 8.85  | 8.76  | 8.89  | 8.88  | 8.84  |
| 1628712 at   | FBgn0030114 | 7.25  | 7.35  | 7.13  | 6.79  | 6.97  | 7.05  |
| 1638447 s at | FBgn0033177 | 7.69  | 7.8   | 7.64  | 7.79  | 8.02  | 7.72  |
| 1625770 at   | FBgn0035518 | 8.23  | 8.33  | 8.31  | 8.45  | 8.37  | 8.35  |
| 1625276 a at | FBgn0000565 | 8.63  | 8.73  | 8.62  | 8.98  | 8.8   | 8.69  |
| 1638008 s at | FBgn0039886 | 7.34  | 7.44  | 7.49  | 6.88  | 6.98  | 7.34  |
| 1627763 at   | FBgn0051048 | 7.03  | 7.13  | 6.79  | 7.14  | 6.94  | 6.75  |
| 1624632 at   | FBgn0011606 | 9.55  | 9.66  | 9.7   | 9.9   | 9.79  | 9.78  |
| 1632404 at   | FBgn0028468 | 10.2  | 10.31 | 10.02 | 10.48 | 9.87  | 10.17 |
| 1628632 at   | ---         | 11.2  | 11.3  | 11.21 | 11.35 | 11.21 | 11.27 |
| 1624483 at   | FBgn0036450 | 8.6   | 8.7   | 8.68  | 8.87  | 8.68  | 8.64  |
| 1632180 at   | FBgn0033038 | 7.67  | 7.78  | 8.27  | 8.36  | 8.01  | 7.83  |
| 1624062 at   | FBgn0035407 | 8.33  | 8.44  | 8.29  | 8.72  | 8.59  | 8.64  |
| 1639024 at   | FBgn0037561 | 7.55  | 7.65  | 7.81  | 7.73  | 7.55  | 7.52  |
| 1636238 at   | FBgn0035959 | 9.35  | 9.45  | 9.76  | 10.19 | 9.77  | 9.76  |
| 1634077 at   | FBgn0030792 | 10.01 | 10.11 | 10.03 | 10.27 | 9.99  | 9.96  |
| 1632455 at   | FBgn0031684 | 10.36 | 10.46 | 10.41 | 10.52 | 10.43 | 10.42 |
| 1628626 at   | FBgn0052537 | 7.09  | 7.2   | 7.18  | 7.62  | 7.69  | 7.56  |
| 1637033 at   | ---         | 7.09  | 7.19  | 7.17  | 7.24  | 7.29  | 7.22  |
| 1637723 at   | FBgn0002781 | 9.58  | 9.68  | 9.5   | 9.63  | 9.46  | 9.56  |
| 1633171 at   | FBgn0031252 | 8.88  | 8.98  | 8.82  | 9.08  | 9.16  | 9.15  |
| 1628969 s at | FBgn0033915 | 9.68  | 9.78  | 9.9   | 10.2  | 9.71  | 9.86  |
| 1638290 at   | FBgn0052528 | 10.09 | 10.19 | 10.06 | 10.36 | 10.19 | 10.24 |

|              |             |       |       |       |       |       |       |
|--------------|-------------|-------|-------|-------|-------|-------|-------|
| 1637860 at   | FBgn0004406 | 7.77  | 7.88  | 7.81  | 8.07  | 8.03  | 7.86  |
| 1634437 at   | FBgn0036306 | 8.55  | 8.66  | 8.78  | 8.91  | 8.82  | 8.91  |
| 1625738 at   | FBgn0037664 | 8.32  | 8.42  | 8.41  | 8.44  | 8.43  | 8.41  |
| 1627139 at   | FBgn0033315 | 7.97  | 8.07  | 7.34  | 7.95  | 8.29  | 8.27  |
| 1627118 at   | FBgn0033973 | 6.98  | 7.09  | 7.14  | 7.48  | 7.56  | 7.42  |
| 1626617 at   | FBgn0000524 | 10.2  | 10.3  | 9.86  | 10.03 | 10.19 | 10.26 |
| 1638962 at   | FBgn0030631 | 8.76  | 8.87  | 8.81  | 8.76  | 8.78  | 8.82  |
| 1636192 at   | FBgn0036035 | 9.19  | 9.29  | 9.7   | 9.48  | 9.42  | 9.55  |
| 1627006 at   | ---         | 12.22 | 12.33 | 12.37 | 12.3  | 12.37 | 12.42 |
| 1623809 s at | FBgn0030151 | 11.21 | 11.31 | 11.46 | 11.48 | 11.35 | 11.32 |
| 1635781 s at | FBgn0038167 | 7.36  | 7.46  | 7.24  | 7.53  | 7.39  | 7.35  |
| 1638874 at   | FBgn0025335 | 10.32 | 10.43 | 10.15 | 10.23 | 10.54 | 10.57 |
| 1635960 at   | ---         | 9.08  | 9.19  | 9.05  | 9.27  | 9.13  | 9.32  |
| 1627027 at   | ---         | 10.51 | 10.62 | 10.3  | 10.52 | 10.52 | 10.57 |
| 1638824 a at | FBgn0004227 | 7.39  | 7.49  | 8.02  | 7.94  | 7.76  | 7.6   |
| 1623040 at   | FBgn0039065 | 9.83  | 9.93  | 9.99  | 9.98  | 10.08 | 10.04 |
| 1625637 at   | FBgn0035028 | 9.17  | 9.27  | 9.14  | 9.08  | 9.09  | 9.09  |
| 1641699 at   | FBgn0026326 | 9.29  | 9.39  | 9.35  | 9.48  | 9.28  | 9.38  |
| 1628466 s at | FBgn0028689 | 11.03 | 11.14 | 11.46 | 11.51 | 11.33 | 11.24 |
| 1639232 s at | FBgn0040282 | 8.55  | 8.65  | 8.58  | 8.75  | 8.56  | 8.43  |
| 1628057 at   | FBgn0028495 | 8.6   | 8.7   | 8.76  | 8.91  | 8.81  | 8.66  |
| 1627539 at   | ---         | 8.9   | 9     | 8.79  | 8.95  | 8.92  | 8.92  |
| 1640318 at   | ---         | 9.71  | 9.81  | 9.52  | 9.96  | 9.76  | 9.6   |
| 1641459 at   | FBgn0025608 | 9.53  | 9.63  | 9.61  | 9.76  | 9.63  | 9.59  |
| 1634178 at   | FBgn0030448 | 9.65  | 9.75  | 9.66  | 9.52  | 9.45  | 9.61  |
| 1623864 at   | FBgn0036117 | 9.47  | 9.57  | 9.34  | 9.72  | 9.26  | 9.41  |
| 1630423 at   | FBgn0034271 | 8.52  | 8.62  | 8.4   | 8.78  | 8.62  | 8.64  |
| 1639995 a at | FBgn0033427 | 7.37  | 7.47  | 7.52  | 7.83  | 7.11  | 7.2   |
| 1631137 at   | FBgn0036237 | 10.56 | 10.66 | 10.49 | 10.5  | 10.61 | 10.68 |
| 1629014 s at | FBgn0037298 | 9.49  | 9.59  | 9.61  | 9.61  | 9.63  | 9.59  |
| 1634414 at   | ---         | 9.68  | 9.78  | 10.06 | 10.07 | 9.75  | 9.86  |
| 1623641 at   | ---         | 8.56  | 8.66  | 8.58  | 8.4   | 8.66  | 8.72  |
| 1638147 at   | FBgn0030883 | 8.76  | 8.86  | 8.54  | 8.65  | 8.82  | 8.95  |
| 1638927 at   | FBgn0035156 | 9.29  | 9.39  | 9.07  | 9.22  | 9.29  | 9.43  |
| 1629423 at   | FBgn0028546 | 9.52  | 9.62  | 9.56  | 9.34  | 9.61  | 9.57  |
| 1627664 a at | FBgn0030499 | 9.4   | 9.5   | 9.34  | 9.64  | 9.56  | 9.52  |

|              |             |       |       |       |       |       |       |
|--------------|-------------|-------|-------|-------|-------|-------|-------|
| 1627295 s at | FBgn0010315 | 9.7   | 9.8   | 9.72  | 9.97  | 9.79  | 9.9   |
| 1630140 at   | FBgn0032374 | 9.33  | 9.43  | 9.15  | 9.35  | 9.76  | 9.73  |
| 1631520 at   | FBgn0033155 | 9.78  | 9.88  | 9.75  | 9.63  | 9.78  | 9.85  |
| 1639243 at   | FBgn0033964 | 7.7   | 7.8   | 7.93  | 7.78  | 7.78  | 7.88  |
| 1631622 at   | FBgn0034109 | 7.87  | 7.98  | 8.07  | 8.17  | 8.05  | 8.07  |
| 1628657 at   | ---         | 7.13  | 7.23  | 8.11  | 7.62  | 8.13  | 7.11  |
| 1637940 s at | FBgn0035981 | 10.07 | 10.18 | 10    | 10.01 | 10    | 10.04 |
| 1628862 at   | FBgn0027508 | 8.39  | 8.49  | 8.29  | 8.42  | 8.39  | 8.47  |
| 1629623 at   | ---         | 9.48  | 9.58  | 9.33  | 9.56  | 9.63  | 9.59  |
| 1632838 at   | FBgn0020235 | 11.47 | 11.57 | 11.84 | 11.74 | 11.69 | 11.73 |
| 1625596 at   | FBgn0020626 | 10.21 | 10.31 | 10.19 | 10.23 | 10.11 | 10.15 |
| 1636797 at   | FBgn0021750 | 8.44  | 8.54  | 8.7   | 8.68  | 8.27  | 8.26  |
| 1626978 at   | ---         | 8.82  | 8.92  | 9.07  | 9.12  | 8.74  | 8.82  |
| 1630433 at   | FBgn0037643 | 9.89  | 9.99  | 10.22 | 10.12 | 10.12 | 10.02 |
| 1622973 at   | FBgn0038110 | 9.03  | 9.13  | 9.15  | 9.16  | 9.17  | 9.12  |
| 1632105 a at | FBgn0026084 | 12.43 | 12.53 | 12.5  | 12.45 | 12.37 | 12.5  |
| 1626731 at   | FBgn0010235 | 9.83  | 9.93  | 10    | 10.4  | 10.08 | 10.01 |
| 1631798 s at | FBgn0039360 | 8.8   | 8.9   | 8.86  | 8.94  | 8.97  | 9.03  |
| 1638511 at   | FBgn0010803 | 10.44 | 10.54 | 10.44 | 10.73 | 10.49 | 10.54 |
| 1636265 s at | FBgn0003502 | 8.77  | 8.87  | 8.8   | 8.87  | 8.84  | 9.14  |
| 1634779 at   | ---         | 9.21  | 9.31  | 9.12  | 9.51  | 9.5   | 9.65  |
| 1629901 at   | FBgn0039638 | 8.05  | 8.15  | 8.21  | 8.68  | 8.52  | 8.19  |
| 1636486 at   | FBgn0004868 | 9.18  | 9.28  | 9.33  | 9.58  | 9.35  | 9.34  |
| 1641488 at   | FBgn0035632 | 9.15  | 9.25  | 8.8   | 8.83  | 8.88  | 9.18  |
| 1637497 at   | FBgn0036104 | 8.72  | 8.82  | 8.55  | 8.86  | 8.81  | 8.83  |
| 1628285 a at | FBgn0017550 | 10.13 | 10.23 | 10.46 | 10.52 | 10.35 | 10.32 |
| 1627259 a at | FBgn0003028 | 11.19 | 11.29 | 11.28 | 11.33 | 11.25 | 11.43 |
| 1627666 at   | FBgn0037379 | 8.07  | 8.17  | 8.19  | 8.39  | 8.16  | 8.12  |
| 1632618 a at | ---         | 9.49  | 9.59  | 9.18  | 9.22  | 9.28  | 9.54  |
| 1625839 at   | FBgn0042083 | 8.9   | 9     | 9.27  | 9.35  | 8.84  | 8.85  |
| 1641241 at   | ---         | 7.65  | 7.75  | 7.44  | 7.77  | 7.71  | 7.81  |
| 1624984 at   | FBgn0037602 | 7.21  | 7.31  | 7.7   | 7.62  | 7.08  | 7.15  |
| 1625179 at   | FBgn0039145 | 8.76  | 8.86  | 8.84  | 9.02  | 8.96  | 8.95  |
| 1639168 at   | FBgn0037377 | 9.41  | 9.51  | 9.48  | 9.6   | 9.36  | 9.35  |
| 1624354 at   | FBgn0013717 | 9.67  | 9.77  | 9.76  | 9.92  | 9.67  | 9.65  |
| 1639981 at   | FBgn0015299 | 11.64 | 11.74 | 11.44 | 11.92 | 11.63 | 11.62 |



|              |                         |       |       |       |       |       |       |
|--------------|-------------------------|-------|-------|-------|-------|-------|-------|
| 1629160 s at | ---                     | 8.57  | 8.67  | 8.44  | 8.73  | 8.35  | 8.59  |
| 1632483 at   | FBgn0004867             | 14.01 | 14.11 | 14.05 | 14.03 | 14.01 | 14.03 |
| 1623402 at   | FBgn0032859             | 11.48 | 11.58 | 11.68 | 11.6  | 11.53 | 11.82 |
| 1633139 at   | ---                     | 9.15  | 9.24  | 9.45  | 9.31  | 9.26  | 9.24  |
| 1638560 a at | FBgn0033424             | 9.86  | 9.96  | 10.11 | 9.83  | 9.95  | 10.04 |
| 1625963 at   | FBgn0039870             | 9.6   | 9.7   | 10.05 | 10.27 | 9.98  | 9.98  |
| 1624251 a at | FBgn0031066 /// FBgn004 | 11.74 | 11.83 | 11.95 | 11.73 | 11.87 | 11.93 |
| 1628990 at   | FBgn0001205             | 7.73  | 7.83  | 7.77  | 7.66  | 7.71  | 7.6   |
| 1640434 at   | FBgn0033773             | 10.11 | 10.21 | 10.06 | 10.27 | 10.22 | 10.25 |
| 1625999 at   | FBgn0037348             | 7.97  | 8.07  | 8.14  | 8.35  | 8.29  | 8.23  |
| 1630756 at   | FBgn0029840 /// FBgn002 | 10.37 | 10.47 | 10.34 | 10.39 | 10.5  | 10.53 |
| 1627058 at   | ---                     | 8.68  | 8.77  | 8.75  | 8.87  | 8.82  | 8.75  |
| 1641689 at   | FBgn0033229             | 8.83  | 8.93  | 8.7   | 8.74  | 8.89  | 8.98  |
| 1637475 at   | FBgn0030241             | 10.54 | 10.64 | 10.57 | 10.73 | 10.65 | 10.62 |
| 1627822 at   | FBgn0029685             | 8.07  | 8.17  | 7.86  | 8.35  | 8.24  | 8.21  |
| 1625317 at   | FBgn0034933             | 8.2   | 8.3   | 8.59  | 8.53  | 8.45  | 8.37  |
| 1638841 at   | FBgn0034029             | 9.02  | 9.12  | 9.18  | 9.11  | 9.07  | 9.03  |
| 1625370 s at | FBgn0050011             | 9.12  | 9.22  | 9.25  | 8.73  | 8.9   | 9.15  |
| 1631249 at   | FBgn0036536             | 8.72  | 8.82  | 8.56  | 9.18  | 8.83  | 8.95  |
| 1629666 at   | ---                     | 8.64  | 8.73  | 8.79  | 9.15  | 8.76  | 8.8   |
| 1640894 at   | ---                     | 8.91  | 9.01  | 8.72  | 8.82  | 9.04  | 9.01  |
| 1641214 at   | FBgn0032060             | 8.84  | 8.93  | 8.91  | 8.99  | 8.81  | 8.97  |
| 1624030 at   | FBgn0023171             | 8.32  | 8.42  | 8.36  | 8.67  | 8.65  | 8.66  |
| 1629766 at   | FBgn0051037             | 8.36  | 8.46  | 8.21  | 8.25  | 8.34  | 8.37  |
| 1628351 at   | FBgn0029503             | 8.49  | 8.59  | 8.86  | 8.96  | 8.87  | 8.91  |
| 1635007 at   | FBgn0040271             | 6.93  | 7.03  | 7.39  | 7.14  | 7.08  | 7.5   |
| 1623251 at   | FBgn0037184             | 8.51  | 8.6   | 8.4   | 8.59  | 8.55  | 8.67  |
| 1635881 at   | FBgn0039254             | 8.5   | 8.6   | 8.49  | 8.78  | 8.48  | 8.5   |
| 1638394 at   | FBgn0034792             | 9.3   | 9.39  | 9.49  | 9.65  | 9.44  | 9.3   |
| 1640568 at   | FBgn0027841             | 8.17  | 8.26  | 8.29  | 8.42  | 8.2   | 8.17  |
| 1637649 at   | FBgn0033162             | 11.12 | 11.22 | 11.46 | 11.23 | 11.17 | 11.11 |
| 1638507 at   | FBgn0035272             | 9.9   | 9.99  | 10.02 | 10.06 | 9.86  | 9.9   |
| 1626299 at   | FBgn0004649             | 11.67 | 11.77 | 11.63 | 11.79 | 11.71 | 11.65 |
| 1637162 at   | FBgn0039831             | 8.58  | 8.67  | 8.67  | 8.55  | 8.43  | 8.52  |
| 1628596 at   | FBgn0034735             | 7.25  | 7.34  | 7.72  | 7.75  | 7.52  | 7.5   |
| 1639381 at   | FBgn0033979             | 11.8  | 11.9  | 11.66 | 11.97 | 11.93 | 11.39 |

|              |                         |       |       |       |       |       |       |
|--------------|-------------------------|-------|-------|-------|-------|-------|-------|
| 1638770 a at | FBgn0039056             | 9.95  | 10.05 | 9.87  | 9.47  | 9.65  | 9.85  |
| 1635911 s at | FBgn0030342             | 8.71  | 8.8   | 8.76  | 8.9   | 8.83  | 8.71  |
| 1637730 at   | FBgn0036395             | 8.56  | 8.66  | 8.32  | 8.68  | 8.63  | 8.66  |
| 1630529 at   | FBgn0031247             | 9.14  | 9.24  | 9.32  | 9.56  | 9.11  | 8.97  |
| 1636341 at   | FBgn0001086             | 10.4  | 10.49 | 10.45 | 10.73 | 10.68 | 10.55 |
| 1623023 at   | FBgn0039919             | 9.51  | 9.61  | 9.52  | 9.72  | 9.53  | 9.67  |
| 1623330 at   | FBgn0035641             | 9.66  | 9.75  | 9.57  | 10.09 | 9.73  | 9.69  |
| 1624478 at   | FBgn0025638             | 7.28  | 7.37  | 7.38  | 7.58  | 8.2   | 8.3   |
| 1632835 at   | ---                     | 8.96  | 9.06  | 8.75  | 9.13  | 9.18  | 9.17  |
| 1637747 s at | FBgn0033713             | 9.59  | 9.69  | 9.46  | 9.73  | 9.73  | 9.84  |
| 1637282 at   | FBgn0038328 /// FBgn002 | 9.53  | 9.63  | 9.63  | 9.89  | 9.51  | 9.51  |
| 1626219 s at | FBgn0040295             | 10.59 | 10.68 | 10.78 | 10.77 | 10.63 | 10.65 |
| 1639821 at   | FBgn0031540             | 8.73  | 8.83  | 8.8   | 9.54  | 8.75  | 8.78  |
| 1627851 at   | FBgn0034307             | 7.96  | 8.06  | 7.98  | 8.17  | 8     | 8.07  |
| 1636520 s at | FBgn0035111             | 9.63  | 9.72  | 9.71  | 10.03 | 9.73  | 9.79  |
| 1641031 s at | FBgn0039350             | 10.76 | 10.85 | 11.21 | 11.42 | 11.02 | 10.83 |
| 1631463 a at | FBgn0000166             | 11.03 | 11.12 | 10.67 | 10.46 | 10.55 | 10.88 |
| 1630620 at   | ---                     | 9.08  | 9.17  | 8.72  | 9.08  | 9.38  | 9.21  |
| 1625797 at   | FBgn0030530             | 8.46  | 8.56  | 8.52  | 8.5   | 8.52  | 8.48  |
| 1628390 at   | FBgn0036533             | 9.95  | 10.04 | 10.09 | 9.89  | 9.83  | 10.04 |
| 1627122 at   | FBgn0052767             | 9.05  | 9.15  | 8.89  | 8.61  | 9     | 9.31  |
| 1636610 at   | FBgn0036396             | 8.59  | 8.68  | 8.51  | 8.69  | 8.52  | 8.79  |
| 1632545 s at | FBgn0034158             | 9.12  | 9.22  | 9.13  | 9.43  | 9.18  | 9.25  |
| 1627253 at   | FBgn0015376             | 8.23  | 8.32  | 8.35  | 8.55  | 8.18  | 8.3   |
| 1627827 a at | FBgn0026373             | 9.49  | 9.59  | 9.61  | 9.79  | 9.6   | 9.51  |
| 1632913 at   | FBgn0030010             | 8.4   | 8.49  | 8.24  | 8.23  | 8.5   | 8.54  |
| 1626883 at   | FBgn0033183             | 10.79 | 10.88 | 10.68 | 10.72 | 10.9  | 10.85 |
| 1634592 at   | ---                     | 8.47  | 8.57  | 8.65  | 8.81  | 8.61  | 8.61  |
| 1636271 a at | FBgn0053066             | 8.36  | 8.45  | 8.34  | 8.35  | 8.12  | 8.3   |
| 1626682 s at | FBgn0031769             | 9.95  | 10.04 | 10.28 | 10.72 | 10.22 | 9.95  |
| 1635799 at   | FBgn0030082             | 10.22 | 10.31 | 9.98  | 10.21 | 10.34 | 10.33 |
| 1637946 at   | FBgn0035951             | 7.92  | 8.02  | 7.86  | 8.06  | 8.01  | 7.94  |
| 1638073 at   | FBgn0030552             | 9.87  | 9.97  | 9.92  | 10.15 | 10.15 | 10    |
| 1627697 at   | FBgn0033672             | 9.06  | 9.16  | 9.08  | 8.79  | 9.04  | 9.01  |
| 1637461 at   | FBgn0031813             | 7.18  | 7.27  | 7.31  | 7.36  | 6.77  | 6.75  |
| 1627707 at   | FBgn0037980             | 8.59  | 8.68  | 8.3   | 8.68  | 8.63  | 8.58  |

|              |             |       |       |       |       |       |       |
|--------------|-------------|-------|-------|-------|-------|-------|-------|
| 1627641 s at | FBgn0040011 | 9.72  | 9.81  | 9.6   | 9.78  | 9.72  | 9.91  |
| 1640821 at   | ---         | 9.19  | 9.28  | 9.45  | 9.81  | 9.45  | 9.26  |
| 1639332 at   | FBgn0025806 | 10.55 | 10.64 | 10.67 | 10.68 | 10.83 | 10.89 |
| 1637143 at   | ---         | 8.33  | 8.42  | 8.87  | 8.57  | 8.43  | 8.38  |
| 1632634 at   | FBgn0037243 | 9.6   | 9.7   | 9.73  | 9.8   | 9.73  | 9.75  |
| 1637899 at   | FBgn0033692 | 8.05  | 8.14  | 7.81  | 8.18  | 8.19  | 8.18  |
| 1628974 at   | ---         | 9.32  | 9.41  | 9.27  | 9.36  | 9.43  | 9.72  |
| 1628663 s at | FBgn0030956 | 10.08 | 10.17 | 9.96  | 10.26 | 10.11 | 10.12 |
| 1637203 at   | FBgn0037345 | 7.73  | 7.83  | 7.67  | 7.76  | 7.83  | 7.96  |
| 1628705 at   | FBgn0039776 | 8.57  | 8.66  | 9.36  | 8.06  | 7.62  | 8.84  |
| 1630859 s at | ---         | 7.95  | 8.04  | 8.14  | 8.23  | 8.13  | 8.26  |
| 1640750 at   | FBgn0032622 | 8.25  | 8.35  | 8.19  | 7.98  | 8.16  | 8.22  |
| 1631690 a at | FBgn0034527 | 8.75  | 8.84  | 8.59  | 8.77  | 8.87  | 8.91  |
| 1634454 at   | ---         | 7.99  | 8.08  | 8.23  | 8.06  | 7.95  | 7.99  |
| 1634035 s at | FBgn0061242 | 8.75  | 8.84  | 8.62  | 9.01  | 8.84  | 8.76  |
| 1634381 a at | FBgn0031566 | 9.09  | 9.19  | 9.01  | 9     | 8.91  | 8.9   |
| 1631636 at   | FBgn0032050 | 9.25  | 9.34  | 9.79  | 9.54  | 9.33  | 9.35  |
| 1636844 at   | FBgn0029173 | 8.98  | 9.07  | 8.92  | 9.16  | 9.26  | 9.25  |
| 1638456 at   | FBgn0033918 | 9.75  | 9.84  | 9.91  | 10    | 9.88  | 9.73  |
| 1623702 at   | FBgn0029882 | 10.95 | 11.04 | 11.12 | 11.37 | 11.16 | 11.15 |
| 1638847 s at | FBgn0003517 | 13.82 | 13.91 | 13.98 | 13.86 | 13.88 | 13.92 |
| 1623487 at   | FBgn0016792 | 10.63 | 10.72 | 10.26 | 10.46 | 10.49 | 10.74 |
| 1640857 at   | FBgn0039118 | 7.23  | 7.32  | 8.01  | 8.21  | 6.12  | 5.84  |
| 1624638 a at | FBgn0037024 | 11.09 | 11.19 | 11.14 | 11.26 | 11.34 | 11.22 |
| 1625102 at   | FBgn0038651 | 7.96  | 8.05  | 8.25  | 8.14  | 8.1   | 8.14  |
| 1626294 a at | FBgn0051641 | 10.43 | 10.52 | 10.27 | 10.5  | 10.34 | 10.48 |
| AFFX-DapX-   | ---         | 8.51  | 8.6   | 8.85  | 9.15  | 8.55  | 8.36  |
| 1629078 s at | FBgn0020386 | 9.43  | 9.52  | 9.44  | 9.1   | 9.39  | 9.73  |
| 1632669 at   | FBgn0014861 | 10.78 | 10.87 | 10.97 | 11.29 | 11.08 | 10.82 |
| 1625854 at   | FBgn0037780 | 8.11  | 8.2   | 7.89  | 8.26  | 8.2   | 8.05  |
| 1629153 s at | ---         | 9.45  | 9.54  | 9.36  | 9.63  | 9.71  | 9.7   |
| 1632261 at   | FBgn0052732 | 9.62  | 9.71  | 9.73  | 9.81  | 9.54  | 9.57  |
| 1628318 at   | FBgn0037025 | 8.45  | 8.54  | 8.63  | 8.66  | 8.66  | 8.46  |
| 1640828 at   | FBgn0037757 | 7.18  | 7.27  | 6.86  | 7.14  | 7.19  | 7.11  |
| 1628435 at   | FBgn0003498 | 10.16 | 10.25 | 10.17 | 10.23 | 10.11 | 10.27 |
| 1640053 at   | FBgn0035271 | 9.6   | 9.69  | 9.77  | 9.65  | 9.54  | 9.54  |

|              |             |       |       |       |       |       |       |
|--------------|-------------|-------|-------|-------|-------|-------|-------|
| 1627515 at   | FBgn0032731 | 9.72  | 9.81  | 9.57  | 9.74  | 9.66  | 9.86  |
| 1638397 at   | FBgn0034959 | 7.39  | 7.48  | 7.5   | 6.98  | 7.35  | 7.82  |
| 1639659 at   | FBgn0021875 | 7.93  | 8.03  | 8.26  | 8.17  | 8.12  | 8.17  |
| 1634282 s at | FBgn0026015 | 8.05  | 8.14  | 8.23  | 8.27  | 8.23  | 8.11  |
| 1623722 at   | FBgn0015520 | 9.89  | 9.98  | 9.9   | 10.14 | 10.08 | 10.1  |
| 1624614 at   | FBgn0038428 | 9.43  | 9.52  | 9.47  | 9.47  | 9.52  | 9.46  |
| 1635552 s at | FBgn0051473 | 9.55  | 9.64  | 9.73  | 9.85  | 9.74  | 9.78  |
| 1627405 at   | FBgn0035415 | 8.43  | 8.52  | 9     | 8.95  | 8.59  | 8.49  |
| 1634253 at   | FBgn0030740 | 11.29 | 11.38 | 11.06 | 11.33 | 11.37 | 11.44 |
| 1639252 s at | FBgn0039635 | 9.75  | 9.84  | 9.97  | 10.01 | 9.83  | 9.85  |
| 1623519 at   | FBgn0000588 | 9.91  | 10    | 9.45  | 9.79  | 10.07 | 10.04 |
| 1632687 at   | FBgn0036558 | 8.27  | 8.36  | 8.43  | 8.76  | 8.5   | 8.43  |
| 1632041 s at | ---         | 8.18  | 8.27  | 8.27  | 8.72  | 8.43  | 8.54  |
| 1626289 at   | FBgn0020930 | 8.36  | 8.45  | 8.39  | 8.64  | 8.39  | 8.39  |
| 1631271 a at | FBgn0026575 | 10.65 | 10.74 | 10.63 | 10.59 | 10.55 | 10.76 |
| 1629133 at   | FBgn0029861 | 8.67  | 8.76  | 8.46  | 8.6   | 8.78  | 8.81  |
| 1630278 s at | FBgn0004571 | 9.9   | 9.99  | 9.98  | 9.86  | 9.92  | 9.84  |
| 1632073 at   | FBgn0036913 | 8.15  | 8.24  | 8.12  | 8.15  | 8.16  | 8.16  |
| 1627617 at   | ---         | 9.4   | 9.49  | 9.49  | 9.41  | 9.17  | 9.34  |
| 1635293 s at | FBgn0036020 | 8.67  | 8.76  | 8.64  | 8.87  | 8.92  | 8.83  |
| 1628362 s at | FBgn0029686 | 7.94  | 8.03  | 8.14  | 8.31  | 8.2   | 8.09  |
| 1632985 at   | FBgn0035390 | 9.75  | 9.84  | 9.77  | 9.75  | 9.64  | 9.79  |
| 1638510 at   | FBgn0034447 | 9.67  | 9.76  | 9.8   | 10.2  | 9.83  | 9.86  |
| 1640375 at   | FBgn0026261 | 10.02 | 10.11 | 10.35 | 10.37 | 10.22 | 10.29 |
| 1627816 a at | FBgn0052264 | 8.81  | 8.9   | 9.32  | 9.06  | 8.86  | 8.82  |
| 1625720 at   | FBgn0039557 | 7.46  | 7.54  | 7.78  | 8.05  | 7.74  | 7.73  |
| 1624996 at   | FBgn0039508 | 8.89  | 8.98  | 8.88  | 8.99  | 8.87  | 8.85  |
| 1627220 at   | FBgn0017567 | 10.81 | 10.9  | 11.14 | 10.98 | 11.06 | 10.98 |
| 1636129 s at | FBgn0031238 | 8.24  | 8.33  | 8.39  | 8.45  | 8.39  | 8.28  |
| 1632839 a at | FBgn0037720 | 8.81  | 8.9   | 8.82  | 8.97  | 8.86  | 8.8   |
| 1627996 a at | FBgn0037339 | 9.7   | 9.79  | 9.6   | 9.83  | 9.67  | 9.75  |
| 1631109 at   | FBgn0034853 | 8.86  | 8.95  | 8.79  | 8.83  | 8.87  | 8.91  |
| 1630245 at   | FBgn0003401 | 10.06 | 10.15 | 10.24 | 10.07 | 10.03 | 10.2  |
| 1634616 at   | ---         | 8.22  | 8.31  | 8.45  | 8.73  | 8.57  | 8.48  |
| 1639858 s at | FBgn0026369 | 8.92  | 9.01  | 8.84  | 8.91  | 8.93  | 8.92  |
| 1623806 at   | FBgn0037555 | 9.29  | 9.38  | 9.44  | 9.45  | 9.39  | 9.44  |

|              |                         |       |       |       |       |       |       |
|--------------|-------------------------|-------|-------|-------|-------|-------|-------|
| 1633466 at   | FBgn0036686             | 8.98  | 9.07  | 9.22  | 9.17  | 9.1   | 9.12  |
| 1640070 a at | FBgn0039809 /// FBgn000 | 11.67 | 11.76 | 12.07 | 11.93 | 11.66 | 11.79 |
| 1637738 at   | FBgn0038808             | 10.01 | 10.1  | 10.14 | 10.21 | 10.12 | 10.1  |
| 1634492 s at | FBgn0037093             | 8.67  | 8.76  | 8.42  | 8.57  | 8.58  | 8.92  |
| 1638465 at   | FBgn0037998             | 7.93  | 8.01  | 7.95  | 8.08  | 8     | 7.85  |
| 1637089 at   | ---                     | 10.53 | 10.62 | 10.35 | 10.51 | 10.54 | 10.64 |
| 1625017 at   | FBgn0034750             | 9.19  | 9.28  | 8.97  | 9.37  | 9.32  | 9.43  |
| 1624928 at   | FBgn0036746             | 8.56  | 8.65  | 8.66  | 8.64  | 8.51  | 8.67  |
| 1637064 at   | ---                     | 11.64 | 11.72 | 11.97 | 11.89 | 11.87 | 11.9  |
| 1640246 at   | FBgn0022943             | 9.51  | 9.6   | 9.67  | 10.03 | 9.74  | 9.69  |
| 1635257 at   | FBgn0031573             | 8.06  | 8.15  | 8.18  | 8.38  | 8.26  | 8.16  |
| 1637581 at   | FBgn0005630             | 7.76  | 7.85  | 7.55  | 8.06  | 7.93  | 7.89  |
| 1629990 at   | FBgn0031676             | 9.05  | 9.13  | 8.81  | 8.81  | 8.94  | 9.09  |
| 1623448 at   | FBgn0038039             | 9.28  | 9.37  | 9.31  | 9.45  | 9.62  | 9.53  |
| 1633634 at   | FBgn0001133             | 8.19  | 8.28  | 8.33  | 8.45  | 8.47  | 8.36  |
| 1631619 a at | ---                     | 8.62  | 8.7   | 8.63  | 8.15  | 8.25  | 8.65  |
| 1625907 at   | FBgn0034926             | 7.44  | 7.53  | 7.64  | 7.84  | 7.62  | 7.5   |
| 1635708 at   | FBgn0023513             | 8.26  | 8.35  | 8.19  | 8.56  | 8.37  | 8.29  |
| 1632434 at   | FBgn0013563 /// FBgn000 | 7.67  | 7.76  | 7.56  | 8.11  | 7.74  | 7.65  |
| 1624788 at   | FBgn0038692             | 8.88  | 8.97  | 8.81  | 9.05  | 9.04  | 9.03  |
| 1627152 at   | FBgn0033477             | 10.11 | 10.2  | 9.99  | 10.57 | 10.06 | 10.03 |
| 1629233 s at | FBgn0037315             | 8.88  | 8.97  | 8.88  | 8.98  | 9.1   | 9.02  |
| 1637349 at   | FBgn0028695             | 9.77  | 9.86  | 9.78  | 10.08 | 9.93  | 9.67  |
| 1622933 at   | FBgn0034729             | 7.53  | 7.62  | 7.56  | 7.95  | 8.03  | 8.22  |
| 1641681 s at | FBgn0035950             | 9.03  | 9.11  | 9.12  | 9.18  | 8.96  | 8.83  |
| 1641616 at   | FBgn0010590             | 11.62 | 11.71 | 11.69 | 11.78 | 11.74 | 11.56 |
| 1632443 at   | FBgn0035690             | 7.25  | 7.33  | 7.52  | 7.46  | 7.3   | 7.39  |
| 1634727 a at | FBgn0003701             | 8.72  | 8.81  | 8.65  | 9.01  | 8.78  | 8.71  |
| 1634773 at   | ---                     | 10.81 | 10.9  | 11    | 10.68 | 10.79 | 10.99 |
| 1627919 at   | FBgn0024978             | 8.81  | 8.9   | 9.06  | 8.89  | 8.92  | 8.94  |
| 1633594 at   | FBgn0028688             | 10.69 | 10.77 | 10.86 | 11.04 | 10.84 | 10.75 |
| 1640066 at   | FBgn0037504             | 8.92  | 9.01  | 9.47  | 9.44  | 9.11  | 9.27  |
| 1629111 at   | FBgn0037109             | 8.23  | 8.31  | 8.25  | 8.61  | 8.6   | 8.52  |
| 1626110 a at | FBgn0030606             | 10.47 | 10.56 | 10.2  | 10.45 | 10.56 | 10.58 |
| 1622980 at   | ---                     | 9.94  | 10.03 | 9.99  | 10.12 | 10.08 | 10.01 |
| 1630341 at   | ---                     | 9.82  | 9.91  | 9.69  | 9.83  | 9.93  | 10    |

|              |             |       |       |       |       |       |       |
|--------------|-------------|-------|-------|-------|-------|-------|-------|
| 1640329 s at | FBgn0036111 | 10.83 | 10.91 | 10.87 | 11.01 | 10.72 | 10.86 |
| 1640995 at   | FBgn0038976 | 10.92 | 11.01 | 11.16 | 11.2  | 11.11 | 11.01 |
| 1639759 s at | FBgn0010633 | 10.4  | 10.48 | 10.48 | 10.85 | 10.52 | 10.56 |
| 1627530 at   | FBgn0032305 | 9.25  | 9.34  | 9.16  | 8.9   | 9.03  | 9.31  |
| 1639302 at   | FBgn0036254 | 8.31  | 8.39  | 8.67  | 8.79  | 8.53  | 8.59  |
| 1626431 at   | FBgn0036291 | 7.33  | 7.41  | 7.43  | 7.57  | 7.54  | 7.37  |
| 1639640 at   | FBgn0052485 | 7.63  | 7.72  | 7.4   | 7.23  | 7.41  | 7.23  |
| 1640024 at   | FBgn0039689 | 8.47  | 8.56  | 8.72  | 8.87  | 8.68  | 8.61  |
| 1633346 at   | FBgn0036184 | 9.74  | 9.82  | 9.73  | 10.03 | 9.82  | 9.78  |
| 1625437 at   | FBgn0042178 | 10.58 | 10.67 | 10.7  | 10.87 | 10.71 | 10.77 |
| 1623207 at   | FBgn0035033 | 9.63  | 9.72  | 9.48  | 9.74  | 9.72  | 9.73  |
| 1631325 at   | FBgn0003511 | 8.58  | 8.66  | 8.4   | 8.84  | 8.67  | 8.71  |
| 1636025 at   | ---         | 9.98  | 10.07 | 10.02 | 9.91  | 10.09 | 10.22 |
| 1630141 at   | FBgn0033264 | 9.79  | 9.88  | 9.99  | 9.99  | 9.98  | 9.96  |
| 1634037 s at | ---         | 10.03 | 10.12 | 9.82  | 9.86  | 9.92  | 9.91  |
| 1630952 at   | ---         | 7.9   | 7.99  | 7.73  | 7.9   | 7.92  | 7.94  |
| 1636180 at   | FBgn0040064 | 10.92 | 11    | 10.86 | 11.3  | 10.96 | 10.78 |
| 1623874 at   | FBgn0031052 | 8.89  | 8.98  | 9.05  | 9.06  | 9.04  | 8.96  |
| 1629357 s at | FBgn0023169 | 9.9   | 9.99  | 9.79  | 9.89  | 9.94  | 9.57  |
| 1628372 a at | FBgn0005696 | 9.23  | 9.32  | 9.19  | 9.57  | 9.38  | 9.25  |
| 1624425 at   | FBgn0032262 | 9.66  | 9.74  | 9.63  | 9.72  | 9.65  | 9.7   |
| 1633560 at   | FBgn0040394 | 9.38  | 9.47  | 9.56  | 9.51  | 9.35  | 9.34  |
| 1635551 at   | FBgn0034061 | 9.19  | 9.28  | 9.37  | 9.02  | 9.06  | 9.28  |
| 1627383 at   | FBgn0000140 | 10.05 | 10.13 | 10.12 | 10.29 | 10.28 | 10.24 |
| 1639795 at   | FBgn0029914 | 9.1   | 9.19  | 9.17  | 9.27  | 9.56  | 9.45  |
| 1631344 at   | FBgn0027949 | 10.43 | 10.52 | 10.25 | 10.56 | 10.73 | 10.6  |
| 1625934 at   | FBgn0037605 | 8.78  | 8.86  | 8.74  | 8.82  | 8.78  | 8.81  |
| 1627165 a at | FBgn0039254 | 7.75  | 7.83  | 7.54  | 7.78  | 7.81  | 7.77  |
| 1632326 at   | ---         | 9.3   | 9.38  | 9.29  | 10.02 | 9.51  | 9.44  |
| 1641350 at   | FBgn0033179 | 10.27 | 10.35 | 10.29 | 10.34 | 10.32 | 10.21 |
| 1640539 a at | FBgn0037679 | 7.57  | 7.66  | 7.85  | 8.09  | 7.85  | 7.68  |
| 1625333 at   | FBgn0053172 | 7.96  | 8.05  | 8.05  | 8.01  | 7.94  | 7.91  |
| 1624071 at   | ---         | 9.51  | 9.59  | 9.43  | 9.32  | 9.57  | 9.61  |
| 1637642 at   | FBgn0030938 | 8.59  | 8.68  | 8.36  | 8.99  | 8.68  | 8.58  |
| 1637265 at   | FBgn0035839 | 7.93  | 8.01  | 8.19  | 8.28  | 8.02  | 7.99  |
| 1632470 at   | FBgn0036340 | 7.15  | 7.24  | 7.36  | 7.46  | 7.26  | 7.23  |

|              |             |       |       |       |       |       |       |
|--------------|-------------|-------|-------|-------|-------|-------|-------|
| 1629309 at   | FBgn0032026 | 10.53 | 10.61 | 10.65 | 10.38 | 10.48 | 10.59 |
| 1625199 s at | FBgn0010316 | 10.55 | 10.63 | 10.56 | 10.67 | 10.56 | 10.69 |
| 1640241 at   | FBgn0035121 | 11.19 | 11.27 | 11.56 | 11.33 | 11.22 | 11.21 |
| 1626044 at   | FBgn0036137 | 10.52 | 10.61 | 10.64 | 10.58 | 10.51 | 10.75 |
| 1637839 at   | FBgn0030306 | 9.81  | 9.89  | 9.94  | 9.79  | 9.87  | 9.92  |
| 1630755 at   | FBgn0031782 | 8.3   | 8.38  | 8.32  | 8.46  | 8.41  | 8.33  |
| 1639993 at   | FBgn0027564 | 7.99  | 8.08  | 7.92  | 8.04  | 7.71  | 7.73  |
| 1633001 at   | FBgn0030447 | 9.05  | 9.13  | 9.34  | 9.34  | 9.38  | 9.39  |
| 1627470 at   | FBgn0003079 | 8.77  | 8.85  | 8.71  | 9.03  | 8.79  | 8.8   |
| 1624795 at   | FBgn0037465 | 8.32  | 8.41  | 8.28  | 8.73  | 8.51  | 8.45  |
| 1624380 at   | FBgn0039753 | 8.17  | 8.26  | 8.45  | 8.38  | 8.26  | 8.39  |
| 1629369 at   | FBgn0035812 | 8.44  | 8.53  | 8.43  | 8.56  | 8.5   | 8.57  |
| 1627898 at   | FBgn0020911 | 8.58  | 8.67  | 8.6   | 8.69  | 8.71  | 8.64  |
| 1640958 at   | ---         | 9.5   | 9.58  | 9.61  | 9.83  | 9.39  | 9.35  |
| 1641669 a at | FBgn0036915 | 8.97  | 9.05  | 8.96  | 9.15  | 9.14  | 9.21  |
| 1623615 at   | FBgn0030834 | 9.57  | 9.65  | 9.91  | 9.9   | 9.77  | 9.74  |
| 1632306 at   | FBgn0037758 | 9.31  | 9.39  | 9.44  | 9.5   | 9.38  | 9.38  |
| 1628784 at   | FBgn0037728 | 13.14 | 13.22 | 13.2  | 13.4  | 13.19 | 13.25 |
| 1631765 at   | FBgn0004210 | 8.63  | 8.72  | 8.79  | 8.66  | 8.38  | 8.67  |
| 1640019 at   | FBgn0011285 | 8.28  | 8.36  | 8.38  | 8.57  | 8.45  | 8.29  |
| 1628109 at   | FBgn0030293 | 9.36  | 9.44  | 9.14  | 9.17  | 9.36  | 9.47  |
| 1630976 at   | FBgn0003977 | 7.11  | 7.2   | 7.39  | 7.31  | 7.32  | 7.18  |
| 1634866 at   | FBgn0030803 | 10.23 | 10.32 | 9.77  | 10.08 | 10.28 | 10.38 |
| 1626240 s at | FBgn0038318 | 8.7   | 8.79  | 8.81  | 9     | 8.8   | 8.68  |
| 1627915 a at | FBgn0001092 | 13.4  | 13.49 | 13.33 | 13.57 | 13.56 | 13.62 |
| 1633394 a at | FBgn0035162 | 10.72 | 10.81 | 11.45 | 11.12 | 10.75 | 10.8  |
| 1624812 at   | ---         | 8.81  | 8.9   | 8.9   | 9.02  | 8.94  | 8.88  |
| 1623479 at   | FBgn0015799 | 9.37  | 9.45  | 9.26  | 9.54  | 9.35  | 9.36  |
| 1624152 at   | FBgn0039293 | 9.25  | 9.34  | 9.31  | 9.56  | 9.42  | 9.36  |
| 1639932 at   | FBgn0014092 | 9.6   | 9.69  | 9.98  | 10.05 | 9.57  | 9.62  |
| 1625047 at   | FBgn0022985 | 9.77  | 9.85  | 9.66  | 9.76  | 10.02 | 10.12 |
| 1639467 at   | FBgn0052672 | 11.57 | 11.65 | 11.89 | 11.69 | 11.5  | 11.6  |
| 1638067 a at | FBgn0031912 | 10.59 | 10.67 | 10.91 | 10.69 | 10.66 | 10.71 |
| 1639091 at   | FBgn0028690 | 11.4  | 11.48 | 11.5  | 11.53 | 11.6  | 11.49 |
| 1627172 s at | ---         | 11.94 | 12.03 | 11.96 | 11.87 | 11.85 | 11.96 |
| 1624267 at   | FBgn0035878 | 10.29 | 10.37 | 10.27 | 10.4  | 10.3  | 10.25 |

|              |             |       |       |       |       |       |       |
|--------------|-------------|-------|-------|-------|-------|-------|-------|
| 1626404 a at | FBgn0000229 | 7.38  | 7.47  | 7.42  | 7.15  | 7.01  | 7.23  |
| 1630995 at   | ---         | 9.88  | 9.96  | 10.07 | 10.14 | 9.84  | 9.98  |
| 1624690 at   | FBgn0036488 | 8.85  | 8.93  | 9.36  | 9.26  | 9.33  | 9.38  |
| 1639784 at   | FBgn0020369 | 11.15 | 11.23 | 11.17 | 11.38 | 11.27 | 11.15 |
| 1636340 at   | FBgn0037778 | 7.63  | 7.72  | 7.85  | 8.02  | 7.7   | 7.74  |
| 1629970 s at | FBgn0015218 | 12.55 | 12.63 | 12.57 | 12.45 | 12.54 | 12.62 |
| 1637612 at   | FBgn0036555 | 8.78  | 8.86  | 8.44  | 8.61  | 8.67  | 8.85  |
| 1637169 at   | FBgn0031020 | 10.34 | 10.43 | 10.71 | 10.58 | 10.54 | 10.46 |
| 1628763 at   | FBgn0035133 | 9.1   | 9.19  | 9.15  | 9.33  | 9.16  | 9.39  |
| 1638979 a at | FBgn0002872 | 9.1   | 9.19  | 9.19  | 9.11  | 9.34  | 9.3   |
| 1626528 at   | ---         | 11.88 | 11.96 | 11.85 | 11.88 | 11.71 | 11.81 |
| 1634092 at   | FBgn0036004 | 10.19 | 10.27 | 10.17 | 10.22 | 10.13 | 10.38 |
| 1625800 at   | FBgn0037017 | 7.63  | 7.71  | 8     | 7.9   | 7.67  | 7.77  |
| 1635760 at   | FBgn0015270 | 8.5   | 8.58  | 8.38  | 8.75  | 8.65  | 8.47  |
| 1635616 a at | FBgn0039877 | 9.16  | 9.24  | 9.34  | 9.53  | 9.16  | 9.09  |
| 1634961 s at | FBgn0020367 | 11.72 | 11.81 | 11.94 | 11.95 | 11.78 | 11.75 |
| 1640526 at   | FBgn0037235 | 9.95  | 10.04 | 10.06 | 10.27 | 10.24 | 10.24 |
| 1622928 at   | FBgn0038576 | 7.36  | 7.44  | 7.69  | 7.83  | 7.67  | 7.56  |
| 1632256 at   | FBgn0010355 | 8.55  | 8.63  | 8.74  | 8.66  | 8.61  | 8.58  |
| 1627409 at   | FBgn0030410 | 8.53  | 8.61  | 8.55  | 8.71  | 8.74  | 8.74  |
| 1641590 at   | FBgn0038118 | 8.07  | 8.15  | 8.51  | 8.51  | 8.22  | 8.08  |
| 1623820 at   | FBgn0035026 | 9.19  | 9.28  | 9.18  | 9.41  | 9.35  | 9.34  |
| 1630957 s at | FBgn0037203 | 10.52 | 10.61 | 10.53 | 10.6  | 10.54 | 10.74 |
| 1634883 at   | FBgn0032292 | 10.11 | 10.19 | 10    | 9.88  | 10.02 | 10.07 |
| 1626563 at   | FBgn0010417 | 8.22  | 8.31  | 8.48  | 8.82  | 8.69  | 8.44  |
| 1624406 at   | FBgn0032246 | 10.88 | 10.97 | 10.98 | 11.26 | 11.07 | 10.9  |
| 1637191 at   | FBgn0021944 | 9.53  | 9.61  | 9.53  | 9.7   | 9.73  | 9.71  |
| 1626208 at   | FBgn0001337 | 9.72  | 9.8   | 9.58  | 9.64  | 9.69  | 9.76  |
| 1625908 a at | FBgn0020370 | 10.59 | 10.67 | 10.94 | 10.96 | 10.71 | 10.63 |
| 1628478 at   | FBgn0034170 | 9.29  | 9.37  | 9.22  | 9.51  | 9.42  | 9.45  |
| 1634849 at   | FBgn0032924 | 9.95  | 10.03 | 9.97  | 10.09 | 10    | 10.05 |
| 1630779 s at | FBgn0027498 | 8.39  | 8.47  | 8.27  | 8.75  | 8.53  | 8.37  |
| 1638806 at   | FBgn0038390 | 8.98  | 9.06  | 9.11  | 9.46  | 9.26  | 9.14  |
| 1635810 at   | FBgn0032018 | 8.58  | 8.66  | 8.62  | 8.69  | 8.58  | 8.74  |
| 1633723 at   | FBgn0039914 | 9.22  | 9.3   | 9.1   | 8.67  | 9.27  | 9.51  |
| 1635831 at   | FBgn0031677 | 11.48 | 11.56 | 11.52 | 11.84 | 11.49 | 11.61 |



|              |                         |       |       |       |       |       |       |
|--------------|-------------------------|-------|-------|-------|-------|-------|-------|
| 1631297 at   | FBgn0020407             | 7.14  | 7.23  | 7.29  | 7.74  | 7.53  | 7.34  |
| 1627558 at   | FBgn0037480             | 8.41  | 8.49  | 8.32  | 8.67  | 8.48  | 8.38  |
| 1638965 at   | FBgn0025830             | 7.87  | 7.95  | 7.81  | 8.02  | 7.95  | 7.79  |
| 1641432 a at | FBgn0016697             | 12.11 | 12.19 | 12.1  | 12.16 | 12.09 | 12.04 |
| 1624008 at   | ---                     | 9.93  | 10.01 | 10.22 | 10.24 | 10.09 | 10.03 |
| 1632694 at   | FBgn0031678             | 6.7   | 6.78  | 6.61  | 7.65  | 7.04  | 7.06  |
| 1632194 at   | FBgn0039120             | 9.22  | 9.3   | 9.38  | 9.46  | 9.39  | 9.23  |
| 1629272 at   | FBgn0031062             | 8.5   | 8.58  | 8.61  | 8.59  | 8.54  | 8.57  |
| 1623480 at   | FBgn0037008             | 7.85  | 7.94  | 8.13  | 8.12  | 7.87  | 7.83  |
| 1641369 at   | ---                     | 10.24 | 10.32 | 10.6  | 10.5  | 10.38 | 10.44 |
| 1640515 s at | FBgn0028582             | 8.51  | 8.6   | 8.22  | 8.14  | 7.79  | 8.27  |
| 1628237 s at | FBgn0032721 /// FBgn003 | 10.39 | 10.48 | 10.63 | 10.66 | 10.48 | 10.38 |
| 1624257 at   | FBgn0030956             | 10.64 | 10.72 | 10.61 | 10.93 | 10.85 | 10.88 |
| 1634691 a at | FBgn0050020             | 8.14  | 8.22  | 7.92  | 8.28  | 8.28  | 8.17  |
| 1624559 a at | FBgn0034051             | 10.97 | 11.05 | 10.96 | 11.31 | 11.13 | 11.19 |
| 1638130 at   | FBgn0038546             | 9.79  | 9.87  | 9.56  | 9.71  | 9.91  | 9.93  |
| 1632828 at   | FBgn0029818             | 9.45  | 9.53  | 9.59  | 9.91  | 9.52  | 9.46  |
| 1636920 s at | FBgn0035436             | 9.3   | 9.38  | 9.49  | 9.46  | 9.33  | 9.4   |
| 1627249 a at | FBgn0001977             | 9.41  | 9.49  | 9.43  | 9.68  | 9.64  | 9.52  |
| 1632188 at   | FBgn0041630             | 8.96  | 9.04  | 9.39  | 9.4   | 9.12  | 8.82  |
| 1639337 at   | FBgn0034572             | 8.32  | 8.4   | 8.25  | 8.31  | 8.46  | 8.38  |
| 1632624 at   | FBgn0000351             | 9.13  | 9.21  | 9.04  | 9.24  | 9.28  | 9.32  |
| 1632834 a at | FBgn0036211 /// FBgn004 | 10.04 | 10.12 | 10.12 | 10.42 | 10.18 | 9.99  |
| 1629062 at   | FBgn0037016             | 7.53  | 7.61  | 8.61  | 7.72  | 7.26  | 7.64  |
| 1630092 at   | FBgn0032047             | 8.13  | 8.21  | 8.14  | 8.44  | 8.21  | 8.32  |
| 1637341 at   | FBgn0028686             | 10.7  | 10.78 | 10.87 | 10.99 | 10.81 | 10.74 |
| 1627984 at   | FBgn0035237             | 8.37  | 8.45  | 8.61  | 8.49  | 8.47  | 8.43  |
| 1633513 a at | FBgn0034688             | 8.66  | 8.74  | 8.29  | 8.71  | 8.83  | 8.74  |
| 1641713 a at | FBgn0039250             | 7.58  | 7.66  | 7.55  | 7.69  | 7.92  | 7.75  |
| 1632567 at   | ---                     | 10.46 | 10.54 | 10.22 | 10.48 | 10.45 | 10.62 |
| 1632784 at   | ---                     | 9.34  | 9.42  | 9.27  | 9.35  | 9.37  | 9.55  |
| 1637276 at   | FBgn0011823             | 12.47 | 12.55 | 12.49 | 12.71 | 12.64 | 12.62 |
| 1628281 at   | FBgn0017572             | 8.84  | 8.92  | 8.97  | 8.81  | 8.64  | 8.91  |
| 1635385 at   | FBgn0039110             | 10.52 | 10.6  | 10.55 | 10.82 | 10.68 | 10.61 |
| 1625804 s at | ---                     | 10.46 | 10.54 | 10.44 | 10.66 | 10.62 | 10.64 |
| 1637793 at   | FBgn0037232             | 7.46  | 7.54  | 7.65  | 7.8   | 7.53  | 7.39  |

|              |             |       |       |       |       |       |       |
|--------------|-------------|-------|-------|-------|-------|-------|-------|
| 1634555 at   | FBgn0037659 | 9.02  | 9.1   | 9.34  | 9.01  | 8.93  | 9.09  |
| 1625253 at   | FBgn0040294 | 9.15  | 9.23  | 9.11  | 9.22  | 9.22  | 9.18  |
| 1640393 s at | FBgn0040929 | 8.68  | 8.76  | 8.52  | 8.58  | 8.76  | 8.92  |
| 1628537 s at | FBgn0035707 | 8.73  | 8.81  | 9.27  | 9.29  | 8.95  | 8.93  |
| 1632420 at   | FBgn0035489 | 9.14  | 9.21  | 9.24  | 9.55  | 9.53  | 9.42  |
| 1640362 at   | FBgn0026871 | 9.25  | 9.33  | 8.84  | 9.29  | 9.28  | 9.2   |
| 1631616 at   | FBgn0040941 | 7.02  | 7.1   | 6.89  | 6.96  | 6.99  | 7.23  |
| 1640286 at   | FBgn0042641 | 7.73  | 7.81  | 7.87  | 8.16  | 7.85  | 7.74  |
| 1630636 s at | FBgn0030328 | 10.55 | 10.62 | 10.56 | 10.65 | 10.57 | 10.61 |
| 1640352 at   | ---         | 11.58 | 11.66 | 11.74 | 11.72 | 11.69 | 11.62 |
| 1634299 at   | FBgn0032017 | 7.32  | 7.4   | 7.49  | 7.7   | 7.42  | 7.36  |
| 1626187 at   | FBgn0038499 | 7.91  | 7.99  | 7.71  | 7.77  | 7.87  | 7.8   |
| 1638486 at   | FBgn0010252 | 7.04  | 7.12  | 6.32  | 6.45  | 6.48  | 6.86  |
| 1630533 at   | FBgn0034569 | 7.91  | 7.99  | 7.49  | 8.12  | 8.15  | 7.97  |
| 1627527 s at | FBgn0030744 | 9.85  | 9.93  | 10.06 | 10.15 | 10.05 | 10.11 |
| 1629306 at   | ---         | 9.87  | 9.95  | 9.86  | 9.94  | 9.87  | 9.92  |
| 1632221 at   | FBgn0031021 | 9.66  | 9.74  | 10.02 | 9.96  | 9.75  | 9.65  |
| 1635051 a at | FBgn0031950 | 9.99  | 10.07 | 9.75  | 9.96  | 10.07 | 10.15 |
| 1631608 at   | FBgn0039000 | 7.3   | 7.38  | 7.13  | 6.4   | 6.86  | 7.96  |
| 1625515 a at | FBgn0003345 | 8.88  | 8.96  | 9.34  | 8.86  | 8.49  | 8.77  |
| 1638348 at   | FBgn0051658 | 7.28  | 7.36  | 7.34  | 7.79  | 7.59  | 7.62  |
| 1632078 at   | FBgn0038453 | 10.49 | 10.57 | 10.45 | 10.75 | 10.62 | 10.66 |
| 1639328 at   | FBgn0030460 | 8.4   | 8.48  | 8.23  | 8.6   | 8.45  | 8.44  |
| 1628123 at   | FBgn0030456 | 10.12 | 10.2  | 10.19 | 10.37 | 10.08 | 10.15 |
| 1628761 s at | FBgn0038220 | 10.03 | 10.1  | 10.1  | 10.07 | 9.79  | 9.98  |
| 1629246 at   | ---         | 8.44  | 8.52  | 8.14  | 8.32  | 8.54  | 8.4   |
| 1629020 s at | FBgn0000117 | 11.31 | 11.39 | 11.46 | 11.55 | 11.38 | 11.29 |
| 1629613 at   | FBgn0038168 | 7.84  | 7.92  | 7.64  | 7.73  | 7.96  | 7.88  |
| 1639052 a at | FBgn0035283 | 9.58  | 9.66  | 9.43  | 9.61  | 9.8   | 9.87  |
| 1632743 a at | FBgn0002183 | 9.58  | 9.66  | 9.76  | 9.98  | 9.87  | 9.67  |
| 1639807 s at | FBgn0032876 | 9.96  | 10.04 | 10.06 | 10.26 | 9.87  | 9.95  |
| 1628155 at   | FBgn0001316 | 9.21  | 9.29  | 9.68  | 8.94  | 8.8   | 9.26  |
| 1633613 at   | FBgn0035087 | 9.67  | 9.75  | 9.56  | 9.39  | 9.45  | 9.57  |
| 1641484 a at | FBgn0003023 | 10.64 | 10.72 | 10.73 | 10.64 | 10.63 | 10.8  |
| 1623733 at   | FBgn0023542 | 10.3  | 10.37 | 10.59 | 10.23 | 9.96  | 10.06 |
| 1630317 at   | FBgn0039335 | 7.59  | 7.67  | 7.72  | 7.77  | 7.72  | 7.52  |

|              |                         |       |       |       |       |       |       |
|--------------|-------------------------|-------|-------|-------|-------|-------|-------|
| 1639648 at   | FBgn0015828             | 10.24 | 10.32 | 10.32 | 10.52 | 10.34 | 10.29 |
| 1635872 at   | FBgn0010405             | 11.74 | 11.81 | 11.98 | 12.18 | 11.88 | 11.76 |
| 1624813 s at | ---                     | 7.46  | 7.53  | 7.97  | 8.12  | 7.42  | 7.61  |
| 1638840 at   | FBgn0037220             | 10.38 | 10.46 | 10.4  | 10.58 | 10.44 | 10.46 |
| 1633757 s at | FBgn0032796             | 8.85  | 8.93  | 8.69  | 8.68  | 9.11  | 9.08  |
| 1627680 at   | FBgn0033376             | 7.22  | 7.3   | 7.69  | 7.7   | 7.24  | 7.11  |
| 1636807 at   | FBgn0027864             | 8.33  | 8.41  | 8.54  | 8.56  | 8.57  | 8.69  |
| 1627842 at   | ---                     | 9.18  | 9.26  | 9.21  | 9.33  | 9.15  | 9.16  |
| 1626521 x at | FBgn0034204             | 7.13  | 7.21  | 7.12  | 7.02  | 7.05  | 7.23  |
| 1637620 s at | FBgn0035206             | 9.18  | 9.26  | 9.38  | 9.55  | 9.21  | 9.29  |
| 1632846 at   | FBgn0031491             | 9.67  | 9.75  | 9.51  | 9.77  | 9.86  | 9.85  |
| 1631138 at   | FBgn0030675             | 7.18  | 7.25  | 7.07  | 7.15  | 7.21  | 7.16  |
| 1639520 at   | FBgn0033032             | 9.37  | 9.45  | 9.36  | 9.49  | 9.77  | 9.83  |
| 1638695 at   | FBgn0030731             | 8.26  | 8.33  | 8.3   | 8.2   | 8.24  | 8.01  |
| 1640178 at   | FBgn0010774             | 12    | 12.08 | 11.8  | 11.99 | 11.89 | 12.06 |
| 1628902 at   | FBgn0038474             | 9.24  | 9.32  | 9.61  | 9.65  | 9.53  | 9.58  |
| 1628744 s at | FBgn0032715 /// FBgn001 | 9.33  | 9.41  | 9.24  | 9.31  | 9.47  | 9.12  |
| 1629470 at   | FBgn0039019             | 9.65  | 9.73  | 9.81  | 10.2  | 9.93  | 9.68  |
| 1635863 at   | FBgn0035872             | 11.02 | 11.1  | 11.13 | 11.18 | 11.05 | 11.11 |
| 1626811 at   | FBgn0039160             | 9.63  | 9.7   | 9.65  | 9.68  | 9.76  | 9.76  |
| 1639768 at   | FBgn0031268             | 10.07 | 10.15 | 9.71  | 10.03 | 10.04 | 10.22 |
| 1634209 at   | FBgn0003087             | 11.15 | 11.23 | 11.05 | 11.55 | 11.51 | 11.5  |
| 1633923 at   | FBgn0030305             | 9.94  | 10.01 | 9.77  | 10.04 | 9.94  | 9.9   |
| 1636253 at   | FBgn0036888             | 9.68  | 9.75  | 9.95  | 9.99  | 9.92  | 9.78  |
| 1639435 at   | FBgn0027603             | 8.84  | 8.92  | 9.22  | 9.34  | 9.04  | 8.86  |
| 1640175 at   | ---                     | 10.73 | 10.8  | 10.82 | 11.07 | 10.87 | 10.84 |
| 1633565 at   | FBgn0033615             | 8.58  | 8.66  | 8.64  | 8.54  | 8.62  | 8.67  |
| 1632234 at   | ---                     | 9.9   | 9.98  | 10.13 | 10.02 | 9.99  | 9.86  |
| 1634453 at   | FBgn0001087             | 8.58  | 8.66  | 8.1   | 8.23  | 8.61  | 8.86  |
| 1627726 a at | ---                     | 9.97  | 10.05 | 9.83  | 9.85  | 10    | 10.05 |
| 1627592 at   | FBgn0034573             | 8.44  | 8.51  | 8.64  | 8.68  | 8.67  | 8.44  |
| 1629848 s at | FBgn0037884             | 9.23  | 9.3   | 9.17  | 9.54  | 9.33  | 9.29  |
| 1639441 at   | FBgn0005585             | 11.81 | 11.88 | 11.93 | 11.68 | 11.84 | 11.98 |
| 1634518 at   | FBgn0035163             | 8.28  | 8.36  | 8     | 8.34  | 8.34  | 8.33  |
| 1623737 a at | FBgn0015791             | 9.91  | 9.98  | 9.98  | 9.89  | 10.04 | 10.07 |
| 1624253 at   | FBgn0052566             | 8.61  | 8.69  | 8.75  | 8.99  | 8.84  | 8.74  |

|              |                         |       |       |       |       |       |       |
|--------------|-------------------------|-------|-------|-------|-------|-------|-------|
| 1634748 at   | ---                     | 8.66  | 8.74  | 8.35  | 8.66  | 8.58  | 8.4   |
| 1634526 a at | FBgn0003187             | 9.82  | 9.89  | 9.85  | 10.3  | 9.87  | 9.88  |
| 1639444 a at | FBgn0039187             | 9.79  | 9.86  | 9.76  | 9.89  | 9.84  | 9.89  |
| 1636546 s at | FBgn0030478             | 10.6  | 10.67 | 10.7  | 10.71 | 10.75 | 10.71 |
| 1628269 at   | FBgn0000486             | 10.78 | 10.86 | 10.85 | 10.96 | 10.93 | 10.75 |
| 1637328 at   | FBgn0025381             | 10.18 | 10.26 | 10.38 | 10.55 | 10.25 | 10.29 |
| 1640064 at   | FBgn0052343             | 8.33  | 8.4   | 8.26  | 8.58  | 8.61  | 8.49  |
| 1637571 at   | FBgn0036847             | 9.56  | 9.64  | 9.5   | 9.96  | 9.82  | 9.81  |
| 1638564 at   | FBgn0038080             | 9.29  | 9.36  | 9.66  | 9.56  | 9.18  | 9.15  |
| 1636152 a at | FBgn0030400 /// FBgn003 | 8.5   | 8.57  | 8.39  | 8.53  | 8.33  | 8.51  |
| 1634255 at   | ---                     | 8.54  | 8.62  | 9.17  | 9.74  | 8.95  | 8.15  |
| 1623386 s at | FBgn0029899             | 7.81  | 7.88  | 7.66  | 7.7   | 7.76  | 7.83  |
| 1637338 at   | FBgn0032311             | 8     | 8.08  | 7.79  | 7.57  | 8.24  | 8.6   |
| 1628673 at   | ---                     | 8.84  | 8.91  | 8.94  | 9.12  | 9     | 8.95  |
| 1638618 a at | FBgn0030625             | 6.86  | 6.93  | 6.99  | 7.2   | 7.18  | 7.07  |
| 1624899 at   | FBgn0003205             | 10.87 | 10.95 | 10.83 | 10.84 | 10.77 | 10.87 |
| 1630177 at   | ---                     | 8.61  | 8.69  | 8.49  | 8.91  | 8.9   | 8.68  |
| 1626557 at   | FBgn0024945             | 9.36  | 9.43  | 9.45  | 9.85  | 9.57  | 9.51  |
| 1630865 s at | FBgn0039846             | 7.97  | 8.04  | 7.9   | 7.98  | 8.02  | 8.04  |
| 1630622 at   | FBgn0037802             | 8.13  | 8.2   | 8.01  | 8.42  | 8.38  | 8.41  |
| 1627415 at   | FBgn0039589             | 9.41  | 9.49  | 9.2   | 9.3   | 9.42  | 9.57  |
| 1632813 at   | FBgn0037648             | 8.63  | 8.71  | 8.72  | 8.97  | 8.7   | 8.7   |
| 1641600 at   | FBgn0032518             | 13.27 | 13.34 | 13.32 | 13.33 | 13.25 | 13.28 |
| 1636884 s at | FBgn0032170             | 9.34  | 9.41  | 9.46  | 9.35  | 9.26  | 9.31  |
| 1626177 s at | FBgn0034372             | 9.31  | 9.38  | 9.47  | 9.53  | 9.46  | 9.31  |
| 1637423 at   | FBgn0036063             | 7.9   | 7.97  | 7.99  | 8.37  | 8.03  | 7.99  |
| 1623009 at   | FBgn0028382             | 9.38  | 9.45  | 9.52  | 9.81  | 9.22  | 9.26  |
| 1637141 at   | FBgn0032339             | 7.73  | 7.8   | 7.94  | 7.83  | 7.44  | 7.51  |
| 1634149 at   | FBgn0027783             | 8.7   | 8.77  | 8.7   | 9.01  | 8.94  | 8.85  |
| 1630771 s at | FBgn0002031             | 11.32 | 11.39 | 11.33 | 11.37 | 11.46 | 11.42 |
| 1629149 at   | FBgn0036911             | 8.54  | 8.62  | 8.46  | 8.75  | 8.86  | 8.84  |
| 1636645 at   | FBgn0034310             | 9.72  | 9.8   | 9.68  | 10.18 | 9.9   | 9.78  |
| 1633840 a at | FBgn0033391             | 10.07 | 10.14 | 10.01 | 10.06 | 10.12 | 10.15 |
| 1623320 at   | FBgn0040344             | 8.35  | 8.42  | 8.31  | 8.49  | 8.48  | 8.38  |
| 1639178 s at | FBgn0016034             | 9.61  | 9.68  | 9.78  | 10.04 | 9.78  | 9.76  |
| 1626857 at   | FBgn0039073             | 9.28  | 9.35  | 9.45  | 9.58  | 9.5   | 9.47  |

|              |                         |       |       |       |       |       |       |
|--------------|-------------------------|-------|-------|-------|-------|-------|-------|
| 1634043 at   | FBgn0034315             | 9.59  | 9.66  | 9.53  | 9.85  | 9.66  | 9.59  |
| 1625875 at   | ---                     | 10.58 | 10.65 | 10.67 | 10.81 | 10.67 | 10.66 |
| 1638272 at   | ---                     | 10.08 | 10.15 | 10.3  | 10.04 | 10.04 | 10.08 |
| 1624889 a at | FBgn0021800             | 8.49  | 8.56  | 9.38  | 8.82  | 8.3   | 8.85  |
| 1630390 at   | FBgn0034922             | 9.25  | 9.32  | 9.48  | 9.65  | 9.45  | 9.31  |
| 1634182 at   | FBgn0035488             | 10.32 | 10.39 | 10.25 | 10.45 | 10.4  | 10.44 |
| 1631048 at   | FBgn0029915             | 10.73 | 10.8  | 10.68 | 10.73 | 10.59 | 10.61 |
| 1632753 a at | FBgn0031575             | 8.41  | 8.48  | 8.31  | 8.61  | 8.65  | 8.55  |
| 1641068 a at | FBgn0003495             | 9.64  | 9.71  | 9.59  | 9.59  | 9.63  | 9.66  |
| 1626833 at   | FBgn0039271             | 8.31  | 8.38  | 8.38  | 8.61  | 8.54  | 8.65  |
| 1627743 at   | FBgn0036973 /// FBgn003 | 7.41  | 7.49  | 7.4   | 7.6   | 7.61  | 7.52  |
| 1633958 at   | FBgn0019932             | 9.83  | 9.9   | 9.79  | 10.08 | 9.88  | 9.84  |
| 1627973 s at | FBgn0053075 /// FBgn003 | 7.97  | 8.04  | 7.87  | 7.96  | 8.08  | 8.06  |
| 1633113 at   | FBgn0036487             | 9.01  | 9.08  | 8.97  | 9.37  | 9.05  | 8.95  |
| 1639966 a at | FBgn0032986             | 10    | 10.07 | 10.09 | 10.05 | 9.82  | 9.98  |
| 1631723 at   | ---                     | 9.12  | 9.19  | 8.92  | 9.01  | 9.17  | 9.14  |
| 1623373 at   | FBgn0029594             | 10.39 | 10.46 | 10.27 | 10.47 | 10.21 | 10.22 |
| 1632381 at   | FBgn0043903             | 9.64  | 9.71  | 9.59  | 9.56  | 9.73  | 9.8   |
| 1632814 at   | FBgn0003114             | 10.05 | 10.13 | 10.02 | 10.11 | 10.33 | 10.3  |
| 1628461 a at | FBgn0034970             | 9.38  | 9.46  | 9.13  | 9.23  | 9.5   | 9.63  |
| 1641703 at   | ---                     | 8.97  | 9.04  | 8.94  | 9.23  | 9     | 9     |
| 1627202 at   | FBgn0043012             | 10.01 | 10.08 | 10.07 | 9.94  | 10.05 | 10.02 |
| 1625878 at   | ---                     | 8.55  | 8.62  | 9     | 9.06  | 8.72  | 8.69  |
| 1625250 at   | FBgn0038863             | 9.81  | 9.88  | 9.69  | 9.95  | 9.82  | 9.89  |
| 1630216 at   | FBgn0026722             | 8.27  | 8.34  | 8.37  | 8.4   | 8.39  | 8.43  |
| 1631095 at   | ---                     | 8.1   | 8.17  | 7.87  | 7.97  | 8.16  | 8.15  |
| 1622926 at   | FBgn0032450             | 8.75  | 8.82  | 8.71  | 9.08  | 8.79  | 8.79  |
| 1625087 a at | FBgn0052137             | 8.25  | 8.32  | 8.27  | 8.05  | 7.58  | 8.09  |
| 1627749 at   | FBgn0032646             | 9.4   | 9.47  | 9.52  | 9.74  | 9.38  | 9.42  |
| 1639673 at   | FBgn0030301             | 7.55  | 7.62  | 7.47  | 7.68  | 7.47  | 7.51  |
| 1623901 s at | FBgn0038947             | 11.08 | 11.15 | 11.24 | 10.62 | 11.03 | 11.14 |
| 1627564 s at | FBgn0019890             | 8.51  | 8.58  | 8.55  | 8.44  | 8.65  | 8.67  |
| 1631527 at   | FBgn0036258             | 11.55 | 11.62 | 11.97 | 11.89 | 11.7  | 11.59 |
| 1627247 at   | FBgn0035891             | 7.39  | 7.46  | 7.34  | 7.38  | 7.47  | 7.35  |
| 1624931 at   | FBgn0026084             | 11.72 | 11.79 | 11.78 | 11.64 | 11.41 | 11.78 |
| 1635409 at   | FBgn0011704             | 12.42 | 12.49 | 12.45 | 12.59 | 12.57 | 12.51 |

|              |             |       |       |       |       |       |       |
|--------------|-------------|-------|-------|-------|-------|-------|-------|
| 1640358 at   | FBgn0032214 | 10.39 | 10.46 | 10.26 | 10.66 | 10.52 | 10.46 |
| 1627005 at   | FBgn0015801 | 8.4   | 8.47  | 8.76  | 8.71  | 8.15  | 8.51  |
| 1641485 at   | FBgn0004066 | 11.49 | 11.56 | 11.45 | 11.67 | 11.52 | 11.48 |
| 1639867 at   | FBgn0000533 | 9.1   | 9.17  | 8.75  | 8.95  | 9.08  | 8.85  |
| 1637060 a at | FBgn0037137 | 11.99 | 12.06 | 12.07 | 11.96 | 11.94 | 12.11 |
| 1630650 at   | ---         | 9.58  | 9.65  | 9.4   | 9.43  | 9.16  | 9.52  |
| 1624150 at   | FBgn0029174 | 11.04 | 11.11 | 11.38 | 11.79 | 11.23 | 11.18 |
| 1627925 at   | FBgn0032451 | 9.75  | 9.82  | 9.65  | 9.94  | 9.83  | 9.75  |
| 1630063 a at | FBgn0040227 | 11.92 | 11.98 | 12.32 | 12.32 | 12    | 11.86 |
| 1636308 at   | FBgn0035762 | 8.15  | 8.22  | 8.3   | 8.19  | 8.11  | 8.03  |
| 1630686 at   | FBgn0030243 | 9.77  | 9.84  | 9.51  | 9.53  | 9.75  | 9.93  |
| 1627685 a at | FBgn0014857 | 10.99 | 11.06 | 11.3  | 11.25 | 11.09 | 11.09 |
| 1631909 at   | ---         | 10.99 | 11.06 | 11.02 | 10.92 | 10.96 | 11.06 |
| 1639876 a at | FBgn0000405 | 13.27 | 13.34 | 13.17 | 13.22 | 13.23 | 13.35 |
| 1629433 at   | FBgn0035228 | 10.25 | 10.32 | 10.25 | 10.27 | 10.42 | 10.42 |
| 1633810 at   | FBgn0036894 | 7.33  | 7.4   | 7.42  | 7.39  | 7.33  | 7.34  |
| 1629620 s at | FBgn0014189 | 12.11 | 12.18 | 12.23 | 12.36 | 12.23 | 12.29 |
| 1632065 at   | FBgn0037964 | 7.84  | 7.91  | 7.72  | 8.04  | 7.95  | 7.92  |
| 1629251 at   | FBgn0051155 | 10.66 | 10.73 | 10.56 | 10.62 | 10.83 | 10.89 |
| 1639025 at   | FBgn0039668 | 7.96  | 8.02  | 7.74  | 8.04  | 8.1   | 8.27  |
| 1632927 at   | FBgn0037634 | 8.53  | 8.6   | 8.54  | 8.9   | 8.93  | 8.88  |
| 1635950 at   | FBgn0004465 | 10.1  | 10.17 | 10.07 | 10.29 | 10.03 | 10.07 |
| 1633209 s at | FBgn0034237 | 11.44 | 11.51 | 11.74 | 11.74 | 11.64 | 11.52 |
| 1625830 a at | FBgn0026173 | 9.28  | 9.34  | 9.19  | 9.32  | 9.05  | 9.25  |
| 1625475 s at | FBgn0004638 | 7.18  | 7.25  | 7.55  | 7.17  | 6.69  | 7.07  |
| 1633076 at   | FBgn0034388 | 12.48 | 12.54 | 12.17 | 12.38 | 12.64 | 12.63 |
| 1630055 a at | FBgn0033339 | 9.41  | 9.48  | 9.48  | 9.6   | 9.43  | 9.47  |
| 1626433 at   | ---         | 9.9   | 9.97  | 10.5  | 10.06 | 9.88  | 10.02 |
| 1627993 at   | FBgn0037022 | 8.44  | 8.51  | 8.36  | 8.84  | 8.61  | 8.54  |
| 1641458 s at | FBgn0025936 | 8.96  | 9.02  | 9.06  | 8.86  | 9.02  | 8.96  |
| 1638919 at   | ---         | 9.04  | 9.11  | 9.05  | 9.21  | 9.3   | 9.2   |
| 1632402 at   | FBgn0037901 | 9.05  | 9.11  | 8.95  | 9.11  | 9.05  | 8.84  |
| 1632171 a at | FBgn0031229 | 8.12  | 8.19  | 8.24  | 8.15  | 8.37  | 8.39  |
| 1640738 a at | FBgn0011700 | 8.6   | 8.67  | 8.46  | 8.83  | 8.72  | 8.67  |
| 1639193 a at | FBgn0039881 | 8.11  | 8.18  | 7.69  | 8.22  | 7.97  | 8     |
| 1630075 s at | FBgn0030772 | 8.45  | 8.51  | 8.33  | 8.38  | 8.65  | 8.75  |

|              |                         |       |       |       |       |       |       |
|--------------|-------------------------|-------|-------|-------|-------|-------|-------|
| 1641456 at   | FBgn0032814             | 8.41  | 8.48  | 8.37  | 8.5   | 8.51  | 8.44  |
| 1636231 at   | FBgn0029853             | 7.88  | 7.95  | 7.77  | 8.12  | 7.94  | 7.84  |
| 1641089 s at | FBgn0039863             | 9.55  | 9.61  | 9.3   | 9.36  | 9.41  | 9.56  |
| 1627207 at   | FBgn0031351             | 8.55  | 8.62  | 8.56  | 8.96  | 8.85  | 8.84  |
| 1636795 at   | FBgn0028962             | 7.79  | 7.85  | 7.94  | 8.17  | 7.91  | 7.68  |
| 1626039 at   | FBgn0038767             | 8.27  | 8.34  | 8.17  | 8.69  | 8.53  | 8.54  |
| 1627609 at   | ---                     | 11.99 | 12.06 | 11.92 | 12.05 | 11.99 | 11.99 |
| 1639553 at   | FBgn0032781             | 9.28  | 9.35  | 9.37  | 9.46  | 9.38  | 9.33  |
| 1633568 s at | FBgn0040002             | 9.91  | 9.97  | 9.96  | 9.8   | 9.95  | 10.04 |
| 1640826 at   | FBgn0037019             | 8.87  | 8.94  | 8.85  | 8.93  | 8.93  | 8.9   |
| 1640118 at   | FBgn0034299             | 10.07 | 10.14 | 10.06 | 10.08 | 10.07 | 10.19 |
| 1623525 at   | FBgn0003044             | 9.56  | 9.62  | 9.52  | 9.63  | 9.69  | 9.7   |
| 1635555 at   | FBgn0032750             | 8.51  | 8.58  | 8.46  | 8.47  | 8.58  | 8.58  |
| 1628623 at   | FBgn0040336             | 8.34  | 8.41  | 8.2   | 8.61  | 8.4   | 8.42  |
| 1635955 at   | FBgn0031281             | 7.02  | 7.09  | 7.11  | 7.37  | 7.04  | 6.97  |
| 1624051 at   | FBgn0038961             | 8.98  | 9.05  | 9.09  | 9.18  | 9.02  | 9.1   |
| 1633734 at   | FBgn0027509 /// FBgn003 | 7.8   | 7.86  | 8.01  | 8.32  | 8.14  | 7.83  |
| 1624058 at   | ---                     | 10.03 | 10.1  | 10    | 9.82  | 10.15 | 10.14 |
| 1631755 at   | FBgn0037370             | 8.75  | 8.82  | 8.88  | 9.18  | 8.94  | 8.92  |
| 1635301 at   | ---                     | 8.5   | 8.56  | 8.55  | 8.9   | 9.02  | 8.96  |
| 1639123 at   | FBgn0025336             | 9.48  | 9.54  | 9.7   | 9.78  | 9.54  | 9.55  |
| 1631251 at   | FBgn0052708             | 8.81  | 8.88  | 8.99  | 8.99  | 8.78  | 8.84  |
| 1629681 x at | FBgn0029738             | 10.28 | 10.35 | 9.95  | 10.18 | 10.24 | 10.13 |
| 1639448 at   | FBgn0039540             | 7.3   | 7.36  | 6.94  | 7.51  | 7.45  | 7.37  |
| 1634954 at   | FBgn0030788             | 9.7   | 9.77  | 9.41  | 9.56  | 9.67  | 9.92  |
| 1639746 at   | ---                     | 9.48  | 9.55  | 9.42  | 9.64  | 9.58  | 9.64  |
| 1637897 at   | ---                     | 9.03  | 9.1   | 9.02  | 9.01  | 9.22  | 9.19  |
| 1634560 at   | FBgn0010340             | 8     | 8.07  | 8.09  | 7.88  | 8.18  | 8.06  |
| 1628767 s at | FBgn0039923             | 11.3  | 11.37 | 11.22 | 11.3  | 11.29 | 11.26 |
| 1639812 at   | FBgn0038686             | 8.73  | 8.8   | 8.8   | 9.13  | 9.04  | 9     |
| 1639330 s at | FBgn0031030             | 11.74 | 11.81 | 11.73 | 11.83 | 11.82 | 11.95 |
| 1631500 at   | FBgn0002781             | 6.82  | 6.88  | 6.68  | 7.19  | 7.11  | 7.34  |
| 1634146 at   | ---                     | 8.65  | 8.71  | 8.51  | 8.71  | 8.81  | 8.85  |
| 1637084 at   | FBgn0038432             | 9.54  | 9.6   | 9.41  | 9.56  | 9.56  | 9.61  |
| 1632819 at   | FBgn0051224             | 9.23  | 9.3   | 9.18  | 9.17  | 9.32  | 9.49  |
| 1632638 at   | FBgn0030877             | 8.75  | 8.82  | 8.79  | 9.16  | 8.87  | 8.77  |

|              |             |       |       |       |       |       |       |
|--------------|-------------|-------|-------|-------|-------|-------|-------|
| 1626038 at   | FBgn0042641 | 9.9   | 9.96  | 9.68  | 9.82  | 9.96  | 9.97  |
| 1640191 a at | FBgn0036478 | 9.02  | 9.08  | 9.35  | 9.55  | 8.99  | 8.93  |
| 1628418 at   | FBgn0000018 | 8.31  | 8.38  | 8.08  | 8.12  | 8.2   | 8.37  |
| 1629720 s at | FBgn0052955 | 9.13  | 9.2   | 8.94  | 9     | 9.19  | 9.16  |
| 1623704 at   | FBgn0028480 | 9.48  | 9.55  | 9.46  | 9.55  | 9.32  | 9.48  |
| 1638529 at   | FBgn0004888 | 11.63 | 11.7  | 11.69 | 11.75 | 11.91 | 11.85 |
| 1627934 at   | FBgn0031391 | 9.43  | 9.49  | 9.29  | 9.79  | 9.45  | 9.46  |
| 1635935 at   | ---         | 8.74  | 8.81  | 8.98  | 9.25  | 9.16  | 9.04  |
| 1638568 s at | FBgn0001169 | 9.12  | 9.19  | 9.23  | 9.59  | 9.22  | 9.39  |
| 1624863 a at | FBgn0027554 | 7.28  | 7.35  | 7.3   | 7.4   | 7.17  | 7.08  |
| 1632596 at   | FBgn0037330 | 9.66  | 9.72  | 9.86  | 9.84  | 9.48  | 9.55  |
| 1639450 s at | ---         | 10.16 | 10.23 | 10.16 | 10.15 | 10.09 | 10.23 |
| 1623811 at   | FBgn0026741 | 9.29  | 9.36  | 9.63  | 9.81  | 9.32  | 9.33  |
| 1628630 at   | FBgn0032847 | 8.84  | 8.9   | 8.96  | 9.08  | 9.07  | 8.94  |
| 1627065 at   | ---         | 9.97  | 10.04 | 9.82  | 10.07 | 10.15 | 10.29 |
| 1629044 at   | FBgn0028978 | 7.83  | 7.9   | 7.72  | 7.74  | 8.14  | 7.94  |
| 1622998 a at | FBgn0035405 | 8.52  | 8.58  | 8.41  | 8.64  | 8.8   | 8.8   |
| 1633108 at   | FBgn0036372 | 10.01 | 10.07 | 10    | 10    | 10.07 | 10.1  |
| 1628853 at   | FBgn0030833 | 9.53  | 9.6   | 9.53  | 9.8   | 9.52  | 9.51  |
| 1635702 a at | FBgn0030054 | 9.14  | 9.2   | 9.03  | 9.09  | 9.15  | 9.16  |
| 1631915 at   | FBgn0040899 | 10.41 | 10.47 | 10.57 | 10.45 | 10.13 | 10.17 |
| 1627849 at   | ---         | 7.54  | 7.6   | 7.36  | 7.66  | 7.62  | 7.73  |
| 1639162 at   | FBgn0020250 | 10.11 | 10.18 | 9.88  | 9.94  | 10.13 | 10.19 |
| 1623599 at   | ---         | 9.29  | 9.36  | 9.48  | 9.54  | 9.39  | 9.35  |
| 1625453 a at | ---         | 10.66 | 10.72 | 10.98 | 10.55 | 10.44 | 10.7  |
| 1634598 a at | FBgn0033452 | 10.23 | 10.29 | 10.13 | 10.12 | 10.33 | 10.33 |
| 1636282 s at | FBgn0010602 | 11.3  | 11.37 | 11.33 | 11.34 | 11.39 | 11.39 |
| 1626360 at   | FBgn0038768 | 9.57  | 9.63  | 9.44  | 9.56  | 9.62  | 9.63  |
| 1631069 a at | FBgn0053088 | 8.4   | 8.46  | 8.37  | 8.35  | 8.4   | 8.44  |
| 1630820 at   | FBgn0039977 | 10.61 | 10.67 | 10.86 | 10.85 | 10.79 | 10.8  |
| 1624271 at   | FBgn0034000 | 7.91  | 7.97  | 8.19  | 8.22  | 8.01  | 8.11  |
| 1639757 at   | FBgn0025742 | 8.8   | 8.86  | 9     | 9.13  | 8.8   | 8.66  |
| 1632512 at   | FBgn0039270 | 8.66  | 8.72  | 8.74  | 8.88  | 8.98  | 8.97  |
| 1627939 a at | FBgn0024891 | 9.47  | 9.53  | 9.53  | 9.55  | 9.47  | 9.43  |
| 1629854 at   | FBgn0030465 | 8.72  | 8.78  | 8.56  | 8.75  | 8.65  | 8.73  |
| 1628777 at   | FBgn0033465 | 8.84  | 8.9   | 8.94  | 9.2   | 8.77  | 8.64  |



|              |             |       |       |       |       |       |       |
|--------------|-------------|-------|-------|-------|-------|-------|-------|
| 1628490 at   | FBgn0039509 | 8.47  | 8.53  | 8.57  | 8.64  | 8.55  | 8.48  |
| 1633682 a at | FBgn0052697 | 10.28 | 10.34 | 10.44 | 10.55 | 10.34 | 10.26 |
| 1627824 at   | ---         | 8.15  | 8.22  | 8.22  | 8.24  | 8.14  | 8.36  |
| 1641361 a at | FBgn0036844 | 8.61  | 8.68  | 8.84  | 8.87  | 8.84  | 8.87  |
| 1625528 at   | FBgn0031544 | 10.3  | 10.37 | 10.31 | 10.38 | 10.33 | 10.38 |
| 1630099 at   | FBgn0033846 | 9.13  | 9.19  | 9.09  | 9.25  | 9.28  | 9.34  |
| 1624050 at   | ---         | 8.95  | 9.01  | 8.95  | 9.1   | 8.99  | 8.85  |
| 1637556 at   | FBgn0039303 | 10.45 | 10.51 | 10.43 | 10.45 | 10.4  | 10.54 |
| 1624883 at   | FBgn0032725 | 10.49 | 10.56 | 10.6  | 10.85 | 10.67 | 10.61 |
| 1626316 at   | FBgn0030288 | 8.08  | 8.14  | 7.87  | 7.72  | 7.98  | 7.91  |
| 1637847 at   | FBgn0032237 | 12.7  | 12.76 | 12.67 | 12.68 | 12.62 | 12.6  |
| 1633188 a at | FBgn0026430 | 10.4  | 10.46 | 10.64 | 10.86 | 10.82 | 10.58 |
| 1631588 at   | FBgn0004654 | 10.62 | 10.68 | 10.39 | 10.39 | 10.41 | 10.44 |
| 1636614 a at | FBgn0040068 | 8.05  | 8.11  | 7.94  | 7.89  | 8.2   | 8.2   |
| 1640290 at   | FBgn0030800 | 8.25  | 8.31  | 8.2   | 8.36  | 8.36  | 8.28  |
| 1637676 at   | FBgn0034368 | 9.56  | 9.63  | 9.6   | 9.66  | 9.56  | 9.67  |
| 1635995 a at | FBgn0037301 | 8.1   | 8.16  | 8.04  | 8.16  | 7.92  | 7.92  |
| 1634527 s at | ---         | 10.18 | 10.24 | 10.12 | 10.43 | 10.27 | 10.35 |
| 1635974 at   | FBgn0015283 | 11.02 | 11.09 | 11.1  | 11.15 | 11.22 | 11.08 |
| 1626339 at   | FBgn0033714 | 8.4   | 8.46  | 8.14  | 8.24  | 8.39  | 8.4   |
| 1624044 at   | ---         | 9.51  | 9.58  | 9.63  | 9.6   | 9.54  | 9.57  |
| 1624888 at   | FBgn0035876 | 8.97  | 9.03  | 9.01  | 9.35  | 9.11  | 9.12  |
| 1636309 at   | FBgn0037838 | 7.99  | 8.05  | 7.76  | 8.24  | 7.89  | 7.89  |
| AFFX-r2-Dro  | FBgn0000042 | 11.24 | 11.31 | 11.13 | 11.23 | 11.28 | 11.19 |
| 1626214 s at | FBgn0027066 | 8.71  | 8.77  | 8.64  | 8.45  | 8.88  | 8.8   |
| 1631133 at   | FBgn0024975 | 7.72  | 7.78  | 6.72  | 7.06  | 7.66  | 7.65  |
| 1631404 at   | FBgn0037249 | 11.13 | 11.19 | 11.37 | 11.3  | 11.34 | 11.25 |
| 1641153 a at | ---         | 12.87 | 12.93 | 12.76 | 12.96 | 12.91 | 12.92 |
| 1632481 at   | FBgn0035763 | 10.9  | 10.96 | 11.23 | 11.14 | 11.07 | 11.03 |
| 1634675 s at | FBgn0029849 | 9.48  | 9.54  | 9.34  | 9.12  | 9.51  | 9.52  |
| 1630992 at   | FBgn0039743 | 9.1   | 9.17  | 9.36  | 9.51  | 9.45  | 9.39  |
| 1640412 at   | ---         | 8.9   | 8.96  | 8.67  | 8.92  | 8.89  | 8.99  |
| 1637994 at   | FBgn0033845 | 8.66  | 8.73  | 8.73  | 8.92  | 8.87  | 8.83  |
| 1632698 at   | ---         | 7.67  | 7.73  | 8.06  | 7.65  | 7.27  | 7.48  |
| 1622944 at   | FBgn0033309 | 9.61  | 9.67  | 9.44  | 9.9   | 9.67  | 9.67  |
| 1626647 at   | FBgn0017577 | 10.34 | 10.4  | 10.72 | 11.01 | 10.67 | 10.44 |

|              |             |       |       |       |       |       |       |
|--------------|-------------|-------|-------|-------|-------|-------|-------|
| 1626981 s at | FBgn0033669 | 9.76  | 9.82  | 9.47  | 9.84  | 9.76  | 9.7   |
| 1625733 at   | ---         | 7.48  | 7.54  | 7.57  | 7.32  | 7.24  | 7.33  |
| 1623277 at   | FBgn0016941 | 9.34  | 9.4   | 9.6   | 9.49  | 9.19  | 9.52  |
| 1636237 s at | FBgn0030845 | 10.14 | 10.2  | 10.26 | 10.44 | 10.24 | 10.16 |
| 1624345 a at | FBgn0038964 | 11.5  | 11.57 | 11.97 | 11.76 | 11.54 | 11.6  |
| 1629259 at   | FBgn0035251 | 7.45  | 7.51  | 7.64  | 7.96  | 7.33  | 7.53  |
| 1635121 a at | FBgn0034744 | 9.55  | 9.61  | 9.52  | 9.51  | 9.65  | 9.58  |
| 1631399 a at | FBgn0029801 | 9.2   | 9.26  | 9.14  | 9.21  | 9.26  | 9.12  |
| 1629592 at   | FBgn0030717 | 9.21  | 9.27  | 9.12  | 9.35  | 9.4   | 9.43  |
| 1635854 s at | ---         | 8.2   | 8.26  | 8.35  | 7.93  | 7.99  | 8.43  |
| 1641635 s at | FBgn0035400 | 8.97  | 9.03  | 9.04  | 9.07  | 9     | 8.99  |
| 1631381 at   | ---         | 10.58 | 10.64 | 10.6  | 10.92 | 10.78 | 10.62 |
| 1633044 at   | FBgn0034877 | 11.53 | 11.59 | 11.84 | 11.71 | 11.75 | 11.72 |
| 1635237 at   | FBgn0030945 | 8.32  | 8.38  | 8.17  | 8.28  | 8.36  | 8.22  |
| 1623907 at   | ---         | 9.17  | 9.23  | 9.62  | 9.21  | 9.46  | 9.46  |
| 1626871 at   | FBgn0029079 | 9.83  | 9.89  | 9.85  | 9.84  | 9.96  | 10.01 |
| 1626448 at   | FBgn0040273 | 9.26  | 9.32  | 9.04  | 9.31  | 9.37  | 9.3   |
| 1630527 at   | FBgn0037670 | 8.61  | 8.67  | 8.56  | 9.2   | 8.96  | 8.9   |
| 1625000 a at | FBgn0052441 | 9.88  | 9.93  | 9.96  | 9.99  | 9.94  | 9.94  |
| 1637148 at   | FBgn0025633 | 10.37 | 10.43 | 10.2  | 10.39 | 10.3  | 10.34 |
| 1630276 at   | FBgn0031904 | 10.41 | 10.47 | 10.31 | 10.66 | 10.22 | 10.27 |
| 1627770 at   | FBgn0010314 | 10.23 | 10.29 | 10.13 | 10.53 | 10.33 | 10.34 |
| 1640036 a at | FBgn0028633 | 7.09  | 7.15  | 6.72  | 6.95  | 7.06  | 7.15  |
| 1637611 at   | FBgn0026749 | 9.55  | 9.61  | 9.46  | 9.65  | 9.64  | 9.64  |
| 1640669 at   | FBgn0039942 | 10.95 | 11.01 | 10.67 | 10.96 | 10.73 | 10.84 |
| 1624797 at   | FBgn0030245 | 8.24  | 8.3   | 8.93  | 8.5   | 7.6   | 8     |
| 1640520 at   | ---         | 11.27 | 11.33 | 10.99 | 11.21 | 11.02 | 11.04 |
| 1627245 s at | FBgn0039186 | 10.42 | 10.48 | 10.03 | 10.4  | 10.39 | 10.48 |
| 1629579 at   | FBgn0032872 | 9.38  | 9.44  | 9.27  | 9.2   | 9.28  | 9.4   |
| 1639716 at   | FBgn0026259 | 9.87  | 9.93  | 10.16 | 9.91  | 9.92  | 9.94  |
| 1628397 at   | FBgn0033272 | 9.31  | 9.37  | 9.3   | 9.44  | 9.49  | 9.48  |
| 1633915 at   | FBgn0037707 | 10.16 | 10.21 | 10.12 | 10.34 | 10.15 | 10.14 |
| 1625618 at   | FBgn0030403 | 8.13  | 8.19  | 8.21  | 8.47  | 8.1   | 8.01  |
| 1633440 a at | FBgn0032812 | 8.54  | 8.6   | 8.29  | 8.72  | 8.58  | 8.58  |
| 1635917 at   | ---         | 7.76  | 7.82  | 8.03  | 7.92  | 8.08  | 8.09  |
| 1626993 at   | ---         | 10.19 | 10.25 | 10.32 | 10.28 | 10.29 | 10.21 |

|              |             |       |       |       |       |       |       |
|--------------|-------------|-------|-------|-------|-------|-------|-------|
| 1634795 a at | FBgn0023175 | 11.53 | 11.59 | 11.62 | 12    | 11.67 | 11.51 |
| 1622912 at   | FBgn0030872 | 7.65  | 7.71  | 7     | 7.19  | 7.41  | 7.22  |
| 1624305 at   | FBgn0028419 | 10.86 | 10.91 | 10.78 | 10.91 | 10.77 | 10.94 |
| 1630611 at   | ---         | 11.93 | 11.99 | 12.24 | 12.15 | 12.14 | 12.15 |
| 1633354 at   | FBgn0031126 | 9.16  | 9.22  | 9.12  | 9.16  | 9     | 9.06  |
| 1637700 s at | FBgn0034858 | 9.82  | 9.87  | 9.75  | 9.69  | 9.72  | 9.79  |
| 1634966 a at | FBgn0010774 | 10.36 | 10.41 | 10.09 | 10.1  | 10.25 | 10.46 |
| 1641370 s at | FBgn0025628 | 10.33 | 10.38 | 10.42 | 10.71 | 10.05 | 10.16 |
| 1625155 a at | FBgn0028968 | 9.59  | 9.65  | 9.83  | 9.89  | 9.63  | 9.56  |
| 1634980 s at | FBgn0036149 | 7.24  | 7.3   | 7.42  | 7.47  | 7.39  | 7.26  |
| 1637866 at   | FBgn0032925 | 9.37  | 9.43  | 9.75  | 9.57  | 9.44  | 9.38  |
| 1627765 a at | FBgn0034433 | 7.48  | 7.53  | 7.13  | 7.5   | 7.65  | 7.64  |
| 1631054 s at | FBgn0039741 | 10.11 | 10.17 | 10.06 | 10.11 | 10.29 | 10.36 |
| 1622925 at   | ---         | 9.62  | 9.68  | 9.51  | 9.4   | 9.56  | 9.54  |
| 1625587 at   | FBgn0034406 | 8.33  | 8.39  | 8.31  | 8.79  | 7.55  | 7.89  |
| 1632266 at   | FBgn0025634 | 8.59  | 8.65  | 8.24  | 8.43  | 8.78  | 8.7   |
| 1635934 at   | FBgn0015544 | 8.9   | 8.95  | 8.97  | 9.22  | 9.33  | 9.17  |
| 1623194 at   | FBgn0033548 | 10.97 | 11.02 | 11.25 | 10.96 | 11.12 | 11.09 |
| 1638036 at   | FBgn0004432 | 13.8  | 13.86 | 13.86 | 13.91 | 13.9  | 13.9  |
| 1639195 a at | ---         | 13    | 13.05 | 12.86 | 12.99 | 12.94 | 12.97 |
| 1625345 at   | FBgn0028746 | 8.81  | 8.87  | 8.4   | 8.44  | 8.84  | 8.88  |
| 1638651 a at | FBgn0038251 | 9.98  | 10.04 | 9.72  | 9.98  | 9.98  | 10.01 |
| 1628573 a at | FBgn0019644 | 11.76 | 11.82 | 12.11 | 11.92 | 11.92 | 11.9  |
| 1630062 a at | ---         | 9.86  | 9.92  | 9.98  | 9.93  | 10.02 | 9.97  |
| 1629864 at   | FBgn0024998 | 7.77  | 7.82  | 7.58  | 7.66  | 7.87  | 7.71  |
| 1624290 at   | FBgn0034733 | 7.44  | 7.5   | 7.77  | 7.85  | 7.47  | 7.3   |
| 1632243 at   | FBgn0037316 | 9.34  | 9.4   | 9.28  | 9.64  | 9.55  | 9.37  |
| 1632279 at   | FBgn0010333 | 10.22 | 10.28 | 10.25 | 10.29 | 10.32 | 10.5  |
| 1635668 at   | FBgn0034939 | 9.05  | 9.11  | 9.27  | 9.54  | 9.15  | 9.14  |
| 1638782 at   | FBgn0034032 | 8.85  | 8.91  | 8.9   | 8.92  | 9.11  | 8.98  |
| 1630745 at   | FBgn0030802 | 10.05 | 10.11 | 10.21 | 10.36 | 10.17 | 10.1  |
| 1639198 at   | FBgn0033317 | 10.37 | 10.43 | 10.3  | 10.26 | 10.44 | 10.42 |
| 1629337 at   | ---         | 8.77  | 8.83  | 8.78  | 8.86  | 8.99  | 8.81  |
| 1628325 at   | FBgn0052179 | 7.91  | 7.96  | 7.71  | 7.78  | 8.08  | 8.17  |
| 1629737 at   | FBgn0015929 | 9.77  | 9.82  | 10.01 | 10.3  | 9.96  | 9.8   |
| 1640158 at   | FBgn0032870 | 9.83  | 9.89  | 9.72  | 9.98  | 9.92  | 9.91  |

|              |             |       |       |       |       |       |       |
|--------------|-------------|-------|-------|-------|-------|-------|-------|
| 1632109 s at | FBgn0025725 | 9.78  | 9.84  | 9.88  | 9.92  | 9.72  | 9.65  |
| 1631050 at   | FBgn0032216 | 11.54 | 11.6  | 11.32 | 11.56 | 11.58 | 11.49 |
| 1630519 at   | FBgn0015834 | 12.03 | 12.09 | 12.18 | 12.21 | 12.12 | 12.09 |
| 1635128 a at | FBgn0000139 | 8.95  | 9.01  | 9.27  | 9.14  | 9.24  | 9.17  |
| 1640886 a at | FBgn0001297 | 7.31  | 7.37  | 7.95  | 7.2   | 7.26  | 7.53  |
| 1639629 at   | FBgn0015794 | 9.39  | 9.45  | 9.44  | 9.51  | 9.5   | 9.49  |
| 1630881 at   | FBgn0035519 | 9.53  | 9.59  | 9.26  | 9.29  | 9.45  | 9.46  |
| 1639621 at   | FBgn0034312 | 7.75  | 7.8   | 7.82  | 7.48  | 7.46  | 7.81  |
| 1637327 at   | FBgn0031216 | 8.58  | 8.64  | 8.68  | 8.63  | 8.56  | 8.63  |
| 1636036 at   | FBgn0035370 | 10.95 | 11    | 10.93 | 11.14 | 11.16 | 11.17 |
| 1632821 a at | FBgn0028954 | 9.75  | 9.81  | 9.6   | 9.75  | 9.8   | 9.76  |
| 1637781 at   | FBgn0038534 | 7.56  | 7.61  | 7.28  | 7.71  | 7.72  | 7.51  |
| 1623825 s at | FBgn0039972 | 11.82 | 11.87 | 11.78 | 12.11 | 11.89 | 11.86 |
| 1634970 at   | FBgn0037026 | 8.63  | 8.69  | 8.54  | 8.85  | 8.78  | 8.72  |
| 1631696 s at | FBgn0034962 | 10.19 | 10.24 | 10.34 | 10.45 | 10.22 | 10.13 |
| 1630408 s at | FBgn0030086 | 12.36 | 12.42 | 12.27 | 12.48 | 12.45 | 12.35 |
| 1631618 s at | FBgn0030208 | 9.61  | 9.67  | 9.41  | 9.75  | 9.61  | 9.48  |
| 1638292 at   | FBgn0037815 | 8.51  | 8.56  | 8.95  | 8.68  | 8.69  | 8.95  |
| 1625187 a at | FBgn0025802 | 8.72  | 8.77  | 8.65  | 8.65  | 8.82  | 8.76  |
| 1633785 at   | FBgn0027496 | 10.2  | 10.25 | 10.28 | 10.43 | 10.18 | 10.18 |
| 1624941 at   | FBgn0050169 | 8.31  | 8.37  | 8.31  | 8.62  | 8.48  | 8.38  |
| 1633364 at   | FBgn0036932 | 9.88  | 9.94  | 9.96  | 10.05 | 10.07 | 10.06 |
| 1628679 at   | FBgn0037338 | 8.56  | 8.61  | 8.54  | 8.47  | 8.33  | 8.49  |
| 1634542 at   | FBgn0035471 | 10.5  | 10.55 | 10.37 | 10.48 | 10.57 | 10.59 |
| 1633799 a at | FBgn0035443 | 7.73  | 7.78  | 7.94  | 8.16  | 8.05  | 7.8   |
| 1627372 a at | ---         | 10    | 10.05 | 10.23 | 9.9   | 9.91  | 10.1  |
| 1629086 s at | FBgn0017539 | 10.59 | 10.64 | 10.86 | 10.93 | 10.76 | 10.72 |
| 1633609 at   | FBgn0031873 | 8.32  | 8.37  | 8.61  | 8.87  | 8.72  | 8.69  |
| 1633673 a at | FBgn0010217 | 12.32 | 12.38 | 12.64 | 12.46 | 12.59 | 12.57 |
| 1630929 at   | FBgn0025700 | 10.82 | 10.88 | 11.09 | 10.69 | 10.78 | 10.9  |
| 1623455 s at | FBgn0030235 | 9.04  | 9.1   | 9.27  | 9.38  | 9.1   | 9.24  |
| 1626751 at   | FBgn0035593 | 9.91  | 9.96  | 9.86  | 10.06 | 10.02 | 9.84  |
| 1637923 at   | FBgn0051938 | 9.02  | 9.07  | 8.94  | 9.21  | 8.78  | 8.88  |
| 1623695 a at | FBgn0036337 | 10.19 | 10.24 | 10.29 | 10.2  | 10.16 | 10.21 |
| 1633730 at   | FBgn0030891 | 9.57  | 9.62  | 9.46  | 9.67  | 9.68  | 9.72  |
| 1631533 at   | FBgn0013773 | 8.98  | 9.03  | 8.72  | 8.97  | 9.08  | 9.03  |

|              |                         |       |       |       |       |       |       |
|--------------|-------------------------|-------|-------|-------|-------|-------|-------|
| 1626190 a at | FBgn0038860             | 7.11  | 7.16  | 7.21  | 7.47  | 7.16  | 7.26  |
| 1634309 at   | FBgn0038532             | 7.77  | 7.82  | 7.75  | 7.67  | 7.75  | 7.74  |
| 1639405 at   | FBgn0026083             | 8.75  | 8.8   | 8.75  | 8.87  | 8.95  | 8.9   |
| 1635706 at   | FBgn0036335             | 9.79  | 9.84  | 10    | 10.17 | 9.73  | 9.86  |
| 1637627 at   | FBgn0004368             | 9.31  | 9.36  | 9.28  | 9.01  | 9.35  | 9.4   |
| 1630565 at   | FBgn0031361             | 8     | 8.06  | 8.25  | 8.27  | 8.19  | 8.08  |
| 1634232 at   | FBgn0032721 /// FBgn003 | 9.88  | 9.94  | 10.38 | 10.25 | 9.95  | 10    |
| 1640744 a at | FBgn0034172             | 7.89  | 7.94  | 7.93  | 8.18  | 7.93  | 7.94  |
| 1636305 a at | FBgn0038107 /// FBgn003 | 10.12 | 10.17 | 9.9   | 10.21 | 10.14 | 10.12 |
| 1641171 at   | FBgn0032511             | 11.02 | 11.07 | 11.25 | 11.1  | 11.1  | 11.12 |
| 1639460 a at | ---                     | 10.85 | 10.9  | 10.32 | 10.71 | 10.68 | 10.75 |
| 1624750 at   | FBgn0033741             | 9.99  | 10.04 | 10.37 | 10.21 | 10.12 | 10.22 |
| 1626425 at   | FBgn0014029             | 10.6  | 10.65 | 10.55 | 10.62 | 10.64 | 10.63 |
| 1630496 a at | FBgn0015546             | 8.99  | 9.04  | 8.78  | 9.28  | 9.06  | 8.93  |
| 1624168 at   | FBgn0030582             | 10.47 | 10.52 | 10.65 | 10.62 | 10.64 | 10.61 |
| 1640215 at   | FBgn0038313             | 9.73  | 9.79  | 9.99  | 9.35  | 9.78  | 9.66  |
| 1637380 s at | FBgn0016126             | 9.97  | 10.02 | 9.89  | 9.53  | 9.27  | 9.54  |
| 1637111 a at | FBgn0013955             | 8.89  | 8.94  | 8.86  | 9.04  | 9.03  | 8.79  |
| 1629469 s at | FBgn0036316             | 11.27 | 11.32 | 11.22 | 10.99 | 11.15 | 11.4  |
| 1635423 s at | FBgn0001218             | 11.85 | 11.9  | 11.85 | 11.82 | 11.77 | 11.9  |
| 1639212 a at | FBgn0036397             | 8.82  | 8.87  | 8.69  | 8.97  | 8.79  | 8.8   |
| 1633106 at   | FBgn0035907             | 9.91  | 9.96  | 9.45  | 10.22 | 10.09 | 10.04 |
| 1636654 s at | FBgn0031635             | 9.63  | 9.68  | 9.26  | 9.71  | 9.79  | 9.73  |
| 1633419 s at | FBgn0052195 /// FBgn003 | 7.39  | 7.44  | 6.88  | 7.31  | 7.83  | 7.68  |
| 1640317 at   | FBgn0004050             | 8.53  | 8.59  | 8.56  | 8.63  | 8.48  | 8.51  |
| 1636276 at   | ---                     | 8.94  | 8.99  | 9.18  | 9.16  | 8.94  | 8.98  |
| 1639633 at   | FBgn0033337             | 8.12  | 8.17  | 7.83  | 8.01  | 8     | 7.97  |
| 1625410 at   | FBgn0036775             | 9.39  | 9.44  | 9.57  | 9.68  | 9.53  | 9.54  |
| 1635299 at   | ---                     | 7.9   | 7.95  | 7.9   | 8.32  | 8.08  | 8.02  |
| 1626831 at   | FBgn0032422             | 8.81  | 8.86  | 9.31  | 9.22  | 8.77  | 9.03  |
| 1623182 at   | FBgn0032053             | 9.71  | 9.76  | 10.12 | 10.07 | 9.75  | 9.64  |
| 1627789 at   | FBgn0029715             | 10.62 | 10.67 | 10.9  | 10.86 | 10.69 | 10.67 |
| 1631320 at   | FBgn0022768             | 8.66  | 8.71  | 8.78  | 8.83  | 8.77  | 8.78  |
| 1641105 at   | FBgn0013531             | 8.3   | 8.35  | 8.21  | 8.67  | 8.62  | 8.5   |
| 1636403 at   | FBgn0037900             | 9.08  | 9.13  | 8.99  | 9.17  | 8.95  | 9.09  |
| 1636721 at   | FBgn0003042             | 8.98  | 9.03  | 8.66  | 8.75  | 8.89  | 8.91  |

|              |             |       |       |       |       |       |       |
|--------------|-------------|-------|-------|-------|-------|-------|-------|
| 1630892 at   | FBgn0034488 | 10.44 | 10.49 | 10.41 | 10.95 | 10.59 | 10.31 |
| 1631531 at   | FBgn0038810 | 9.06  | 9.11  | 9.5   | 9.6   | 9.09  | 9     |
| 1631465 at   | FBgn0036423 | 7.41  | 7.46  | 7.35  | 7.85  | 7.74  | 7.63  |
| 1637574 at   | FBgn0027620 | 10.45 | 10.5  | 10.57 | 10    | 10.53 | 10.53 |
| 1637583 at   | FBgn0033934 | 10.07 | 10.12 | 10.09 | 10.19 | 10.35 | 10.34 |
| 1636189 at   | FBgn0003124 | 11.39 | 11.44 | 11.22 | 11.42 | 11.41 | 11.34 |
| 1640710 at   | FBgn0028685 | 10.86 | 10.91 | 10.85 | 10.93 | 10.94 | 10.83 |
| 1623475 s at | FBgn0003261 | 12.7  | 12.75 | 12.67 | 12.77 | 12.75 | 12.67 |
| 1633962 a at | FBgn0023516 | 9.51  | 9.57  | 9.38  | 9.59  | 9.46  | 9.47  |
| 1622892 s at | FBgn0035889 | 8.64  | 8.69  | 8.75  | 8.95  | 8.59  | 8.62  |
| 1633477 at   | FBgn0034631 | 7.13  | 7.18  | 7.58  | 7.63  | 7.5   | 7.16  |
| 1632024 at   | ---         | 9.08  | 9.13  | 8.92  | 9.09  | 9.21  | 9.19  |
| 1632292 at   | FBgn0040298 | 9.01  | 9.06  | 8.8   | 9.09  | 9.14  | 9.16  |
| 1638541 at   | ---         | 8.93  | 8.98  | 8.89  | 9.02  | 8.98  | 8.96  |
| 1638754 s at | FBgn0034088 | 7.63  | 7.68  | 7.6   | 7.85  | 7.86  | 7.9   |
| 1628648 at   | FBgn0027524 | 9.77  | 9.82  | 9.68  | 10.05 | 9.64  | 9.61  |
| 1635468 a at | FBgn0036689 | 9.51  | 9.56  | 9.49  | 9.66  | 9.68  | 9.63  |
| 1631742 s at | FBgn0002781 | 7.98  | 8.03  | 7.78  | 8.04  | 7.89  | 8.19  |
| 1624547 s at | FBgn0004587 | 10.32 | 10.37 | 10.24 | 10.25 | 10.55 | 10.46 |
| 1629881 at   | FBgn0028411 | 10.95 | 11    | 11.06 | 11.18 | 11.15 | 11.11 |
| 1625362 at   | ---         | 9.31  | 9.36  | 9.29  | 9.32  | 9.54  | 9.43  |
| 1635771 a at | FBgn0052306 | 9.18  | 9.23  | 9.35  | 9.29  | 9.29  | 9.24  |
| 1629243 at   | ---         | 7.45  | 7.5   | 7.46  | 7.43  | 7.59  | 7.36  |
| 1628483 at   | FBgn0030142 | 9.37  | 9.42  | 9.67  | 9.56  | 9.34  | 9.38  |
| 1639029 at   | FBgn0002715 | 8.68  | 8.73  | 8.57  | 9.07  | 8.86  | 8.89  |
| 1637987 at   | FBgn0039122 | 10.32 | 10.37 | 10.32 | 10.09 | 10.23 | 10.42 |
| 1638804 a at | ---         | 9.91  | 9.96  | 9.97  | 10.18 | 10.01 | 10.02 |
| 1636067 at   | ---         | 9.2   | 9.25  | 9.08  | 9.12  | 9.3   | 9.24  |
| 1641606 s at | FBgn0037852 | 9.06  | 9.11  | 8.87  | 9.04  | 9.01  | 9.02  |
| 1638758 at   | FBgn0029819 | 10.14 | 10.19 | 10.01 | 10.21 | 10.14 | 10.15 |
| 1625589 at   | FBgn0033840 | 9.03  | 9.07  | 8.87  | 9.28  | 9.2   | 9.12  |
| 1625284 at   | FBgn0039150 | 9.1   | 9.15  | 9.03  | 9.24  | 9.06  | 8.99  |
| 1639321 s at | FBgn0003717 | 11.23 | 11.28 | 11.05 | 11.03 | 11.09 | 11.28 |
| 1635058 at   | FBgn0038989 | 9.55  | 9.6   | 9.71  | 9.47  | 9.6   | 9.69  |
| 1638165 s at | FBgn0052737 | 7.51  | 7.56  | 7.78  | 8.03  | 8.01  | 8.09  |
| 1631677 at   | FBgn0030093 | 10.65 | 10.7  | 10.47 | 10.76 | 10.8  | 10.77 |

|              |             |       |       |       |       |       |       |
|--------------|-------------|-------|-------|-------|-------|-------|-------|
| 1634912 at   | FBgn0002780 | 12.55 | 12.6  | 12.74 | 12.7  | 12.55 | 12.59 |
| 1637069 at   | FBgn0035021 | 8.33  | 8.38  | 8.2   | 8.45  | 8.47  | 8.42  |
| 1630935 at   | FBgn0033194 | 8.38  | 8.43  | 8.54  | 8.32  | 8.09  | 8.34  |
| 1628314 a at | FBgn0030955 | 8.01  | 8.05  | 8.34  | 7.71  | 7.87  | 8.11  |
| 1639140 at   | FBgn0034068 | 9.88  | 9.92  | 10    | 10.28 | 10    | 9.87  |
| 1628598 s at | FBgn0037357 | 9.33  | 9.38  | 9.34  | 9.38  | 9.23  | 9.12  |
| 1641035 a at | FBgn0039130 | 10.02 | 10.07 | 9.91  | 9.81  | 9.96  | 10.01 |
| 1623045 at   | FBgn0025366 | 12.31 | 12.36 | 12.61 | 12.57 | 12.21 | 12.09 |
| 1634396 at   | FBgn0038381 | 9.62  | 9.67  | 9.34  | 9.76  | 9.93  | 9.83  |
| 1625178 at   | FBgn0051038 | 7.68  | 7.72  | 7.81  | 8.11  | 7.07  | 7.5   |
| 1638248 at   | ---         | 10.73 | 10.78 | 10.77 | 10.95 | 10.71 | 10.64 |
| 1632487 at   | FBgn0037942 | 9.66  | 9.7   | 9.56  | 9.62  | 9.56  | 9.49  |
| 1638887 a at | FBgn0034728 | 9.47  | 9.52  | 9.44  | 9.44  | 9.55  | 9.46  |
| 1629843 s at | FBgn0029996 | 11.46 | 11.5  | 11.26 | 11.29 | 11.28 | 11.4  |
| 1631817 a at | FBgn0034079 | 10.92 | 10.97 | 10.91 | 11.18 | 11.06 | 11.01 |
| 1624780 at   | FBgn0040372 | 9.7   | 9.75  | 9.33  | 9.42  | 9.53  | 9.88  |
| 1624603 at   | FBgn0036314 | 8.7   | 8.75  | 9.02  | 9.19  | 8.87  | 8.89  |
| 1637769 s at | FBgn0000259 | 11.66 | 11.7  | 11.9  | 11.83 | 11.89 | 11.91 |
| 1625243 a at | FBgn0000541 | 8.81  | 8.86  | 8.8   | 8.62  | 8.54  | 8.73  |
| 1634737 at   | FBgn0038427 | 8.26  | 8.31  | 8.06  | 8.29  | 8.27  | 8.1   |
| 1632335 at   | FBgn0039359 | 13.2  | 13.24 | 13.41 | 13.14 | 13.4  | 13.37 |
| 1626169 at   | FBgn0024973 | 8.59  | 8.64  | 8.72  | 8.88  | 8.55  | 8.37  |
| 1641312 at   | FBgn0001308 | 9.24  | 9.29  | 9.34  | 9.46  | 9.28  | 9.15  |
| 1640972 at   | FBgn0010317 | 8.69  | 8.74  | 8.69  | 8.78  | 8.72  | 8.7   |
| 1624841 s at | ---         | 8.81  | 8.85  | 8.97  | 8.68  | 8.33  | 8.47  |
| 1633233 a at | ---         | 9.26  | 9.31  | 9.13  | 9.24  | 9.28  | 9.38  |
| 1630224 at   | FBgn0034265 | 8.55  | 8.6   | 8.28  | 8.62  | 8.7   | 8.7   |
| 1633100 a at | FBgn0011584 | 9.02  | 9.07  | 8.93  | 8.86  | 8.99  | 9.12  |
| 1633173 s at | FBgn0052542 | 7.02  | 7.07  | 6.8   | 6.62  | 6.88  | 6.88  |
| 1636980 s at | ---         | 10.18 | 10.23 | 10.15 | 10.21 | 10.18 | 10.22 |
| 1639108 at   | ---         | 9.84  | 9.89  | 10.03 | 9.99  | 9.96  | 9.93  |
| 1623638 a at | FBgn0035059 | 7.67  | 7.71  | 7.25  | 7.25  | 7.81  | 7.79  |
| 1639509 at   | FBgn0022069 | 10.93 | 10.98 | 11.03 | 10.99 | 10.88 | 10.95 |
| 1623176 at   | FBgn0032488 | 9.07  | 9.12  | 9.07  | 9.51  | 9.32  | 9.22  |
| 1628402 a at | FBgn0032135 | 8.16  | 8.21  | 7.95  | 8.26  | 8.28  | 8.33  |
| 1623043 s at | FBgn0035229 | 9.36  | 9.4   | 9.15  | 9.3   | 9.56  | 9.45  |

|              |             |       |       |       |       |       |       |
|--------------|-------------|-------|-------|-------|-------|-------|-------|
| 1640282 at   | FBgn0036827 | 8.98  | 9.02  | 9.01  | 9.11  | 9.06  | 9.2   |
| 1627390 at   | FBgn0037344 | 8.04  | 8.09  | 8.23  | 8.15  | 7.99  | 7.98  |
| 1627995 at   | FBgn0032329 | 8.32  | 8.37  | 9.18  | 8.51  | 8.41  | 8.46  |
| 1637164 at   | FBgn0037874 | 13.25 | 13.3  | 13.3  | 13.38 | 13.4  | 13.36 |
| AFFX-r2-Bs-c | ---         | 8.65  | 8.7   | 8.95  | 9.35  | 8.74  | 8.59  |
| 1638857 at   | FBgn0031493 | 9.11  | 9.15  | 9.3   | 9.28  | 9.24  | 9.16  |
| 1633336 at   | ---         | 8.97  | 9.02  | 9.09  | 8.92  | 9.01  | 8.97  |
| 1637352 a at | FBgn0042135 | 9.63  | 9.67  | 9.47  | 9.46  | 9.69  | 9.77  |
| 1631212 at   | FBgn0040339 | 9.95  | 9.99  | 9.88  | 10.02 | 9.86  | 9.86  |
| 1623496 at   | FBgn0001330 | 8.18  | 8.22  | 8.45  | 8.39  | 8.23  | 8.16  |
| 1632980 at   | FBgn0036824 | 10.57 | 10.61 | 10.91 | 10.68 | 10.53 | 10.79 |
| 1628248 at   | FBgn0003334 | 10.67 | 10.72 | 10.46 | 10.55 | 10.61 | 10.84 |
| 1638446 a at | FBgn0031492 | 8.62  | 8.66  | 8.72  | 8.92  | 8.8   | 8.67  |
| 1629694 at   | FBgn0005648 | 7.06  | 7.1   | 6.86  | 7.77  | 7.02  | 7.27  |
| 1630732 at   | FBgn0031456 | 8.09  | 8.13  | 7.93  | 8.13  | 8.24  | 8.27  |
| 1623967 at   | FBgn0015296 | 9.46  | 9.51  | 9.46  | 9.52  | 9.73  | 9.62  |
| 1629795 at   | ---         | 8.85  | 8.9   | 8.63  | 8.8   | 8.77  | 8.82  |
| 1634316 at   | FBgn0030246 | 9     | 9.04  | 9.26  | 9.2   | 9.11  | 9.02  |
| 1629809 at   | FBgn0050491 | 8.21  | 8.25  | 8.2   | 8.11  | 7.98  | 8.05  |
| 1635909 at   | ---         | 8.36  | 8.4   | 8.68  | 8.58  | 8.27  | 8.41  |
| 1631733 at   | FBgn0026089 | 9.95  | 10    | 10.05 | 10.1  | 9.97  | 9.84  |
| 1623545 at   | FBgn0005655 | 11.78 | 11.82 | 11.98 | 12.06 | 12.09 | 11.91 |
| 1624386 at   | FBgn0027057 | 9.24  | 9.28  | 9.39  | 9.49  | 9.48  | 9.32  |
| 1623086 at   | FBgn0004913 | 9.82  | 9.86  | 9.82  | 10.09 | 10.01 | 9.87  |
| 1640661 at   | ---         | 7.85  | 7.9   | 8.01  | 7.96  | 7.88  | 7.95  |
| 1628445 at   | FBgn0053213 | 8.98  | 9.02  | 8.95  | 9.32  | 9.09  | 8.87  |
| 1639878 at   | FBgn0040666 | 9.8   | 9.84  | 9.97  | 9.98  | 9.78  | 9.84  |
| 1633784 at   | FBgn0037638 | 8.86  | 8.91  | 8.98  | 9.07  | 8.91  | 8.87  |
| 1637554 a at | FBgn0011763 | 9.98  | 10.03 | 10.07 | 10.05 | 9.98  | 10.03 |
| 1623855 s at | FBgn0036187 | 8.45  | 8.49  | 8.44  | 8.45  | 8.43  | 8.46  |
| 1625204 a at | FBgn0031995 | 8.93  | 8.98  | 8.71  | 8.79  | 8.8   | 8.77  |
| 1637038 at   | FBgn0037569 | 8.21  | 8.25  | 8.15  | 8.3   | 8     | 8.01  |
| 1640121 a at | FBgn0033380 | 8.71  | 8.76  | 8.79  | 9.08  | 8.92  | 8.93  |
| 1638624 at   | FBgn0015781 | 8.88  | 8.92  | 9.03  | 9.12  | 8.95  | 9.16  |
| 1627197 at   | FBgn0004574 | 8.65  | 8.69  | 8.62  | 8.92  | 8.91  | 8.69  |
| 1641607 at   | ---         | 9.23  | 9.27  | 8.92  | 9.08  | 9.26  | 9.06  |



|              |                         |       |       |       |       |       |       |
|--------------|-------------------------|-------|-------|-------|-------|-------|-------|
| 1641328 at   | FBgn0016119 /// FBgn000 | 11.82 | 11.86 | 12.23 | 12.07 | 11.98 | 11.98 |
| 1626947 s at | FBgn0002521             | 11.16 | 11.21 | 11.02 | 11.3  | 11.11 | 11.21 |
| 1637841 at   | FBgn0033199             | 8.56  | 8.6   | 8.27  | 8.53  | 8.44  | 8.51  |
| 1635827 s at | FBgn0016917             | 10.15 | 10.19 | 10.15 | 10.15 | 10.23 | 10.25 |
| 1640138 at   | FBgn0033017             | 11.38 | 11.42 | 11.33 | 11.57 | 11.45 | 11.4  |
| 1634619 at   | FBgn0032147             | 7.85  | 7.89  | 7.8   | 7.75  | 7.13  | 7.45  |
| 1630213 at   | FBgn0037255             | 8.65  | 8.7   | 9.01  | 9.35  | 8.86  | 8.7   |
| 1633331 at   | FBgn0020306             | 10.53 | 10.57 | 10.52 | 10.42 | 10.35 | 10.63 |
| 1637142 at   | FBgn0031824             | 9.38  | 9.43  | 9.4   | 9.78  | 9.5   | 9.23  |
| 1635239 at   | FBgn0035164             | 8.8   | 8.85  | 9.06  | 9.32  | 8.88  | 8.76  |
| 1638186 a at | FBgn0034542             | 8.77  | 8.82  | 8.73  | 8.99  | 8.78  | 8.65  |
| 1625691 at   | FBgn0046687             | 9.4   | 9.44  | 9.15  | 9.11  | 9.2   | 9.37  |
| 1628943 at   | FBgn0036299             | 9.2   | 9.24  | 9.1   | 9.27  | 9.24  | 9.25  |
| 1632051 at   | ---                     | 8.84  | 8.88  | 8.7   | 8.82  | 9     | 8.96  |
| 1626158 s at | FBgn0026630             | 9.85  | 9.9   | 9.74  | 9.86  | 9.95  | 10.1  |
| 1626899 at   | ---                     | 8.97  | 9.02  | 9.14  | 9.26  | 9.07  | 9.03  |
| 1634871 s at | ---                     | 8.8   | 8.84  | 8.54  | 8.7   | 8.61  | 8.74  |
| 1638526 a at | FBgn0039240             | 8.51  | 8.55  | 8.5   | 8.49  | 8.62  | 8.54  |
| 1630911 s at | FBgn0030719             | 10.72 | 10.76 | 10.94 | 10.86 | 10.76 | 10.8  |
| 1630731 at   | FBgn0035414             | 7.54  | 7.59  | 7.23  | 7.59  | 7.76  | 7.71  |
| 1641566 s at | FBgn0036816             | 10.93 | 10.98 | 11.12 | 11.21 | 10.99 | 11.12 |
| 1629005 a at | FBgn0034971             | 9.26  | 9.3   | 9.21  | 8.83  | 9.28  | 9.24  |
| 1639086 s at | FBgn0038145             | 12.51 | 12.55 | 12.5  | 12.62 | 12.55 | 12.59 |
| 1641584 at   | FBgn0037922             | 10.09 | 10.13 | 9.8   | 10.42 | 10.25 | 10.21 |
| 1639378 at   | FBgn0036850             | 8.49  | 8.53  | 8.27  | 8.74  | 8.62  | 8.65  |
| 1625426 at   | FBgn0032171             | 8.87  | 8.91  | 8.57  | 8.78  | 8.87  | 8.87  |
| 1636544 at   | FBgn0036489             | 8.97  | 9.01  | 8.97  | 8.71  | 8.59  | 8.88  |
| 1636926 s at | FBgn0000250             | 11.51 | 11.56 | 11.28 | 11.47 | 11.62 | 11.59 |
| 1637814 s at | FBgn0040308             | 9.11  | 9.16  | 9.2   | 9.25  | 9.33  | 9.3   |
| 1628017 a at | FBgn0004419             | 13.24 | 13.29 | 13.07 | 13.23 | 13.34 | 13.31 |
| 1639555 at   | FBgn0033802             | 9.9   | 9.94  | 9.92  | 10.02 | 9.74  | 10.06 |
| 1625480 at   | FBgn0035586             | 8.28  | 8.33  | 8.24  | 8.11  | 8.3   | 8.32  |
| 1625125 at   | FBgn0030612             | 9.55  | 9.59  | 9.55  | 9.55  | 9.73  | 9.66  |
| 1625107 at   | FBgn0000221             | 8.01  | 8.05  | 7.5   | 7.86  | 7.75  | 7.84  |
| 1631090 a at | FBgn0037234             | 8.51  | 8.55  | 8.58  | 8.74  | 8.64  | 8.78  |
| 1624032 at   | FBgn0031670             | 11.47 | 11.52 | 11.28 | 11.58 | 11.46 | 11.46 |

|              |             |       |       |       |       |       |       |
|--------------|-------------|-------|-------|-------|-------|-------|-------|
| 1623648 s at | FBgn0035226 | 9.18  | 9.22  | 9.59  | 9.4   | 9.19  | 9.23  |
| 1634390 s at | FBgn0017565 | 13.2  | 13.24 | 13.39 | 13.44 | 13.32 | 13.27 |
| 1632547 at   | ---         | 12.79 | 12.83 | 12.66 | 12.92 | 12.81 | 12.84 |
| 1624496 at   | FBgn0028554 | 11.08 | 11.13 | 11.01 | 11.06 | 10.99 | 11.11 |
| 1637470 at   | FBgn0030753 | 9.62  | 9.66  | 9.75  | 9.92  | 9.75  | 9.72  |
| 1627021 at   | FBgn0037622 | 7.99  | 8.04  | 7.83  | 8.28  | 8.13  | 8.09  |
| 1626135 s at | FBgn0027588 | 10.34 | 10.38 | 10.52 | 10.43 | 10.24 | 10.32 |
| 1623952 a at | FBgn0020887 | 10.34 | 10.38 | 10.24 | 10.24 | 10.17 | 10.36 |
| 1625763 at   | FBgn0031263 | 11.07 | 11.11 | 11.41 | 11.35 | 10.87 | 10.86 |
| 1640295 a at | FBgn0036518 | 9.34  | 9.38  | 9.46  | 9.59  | 9.14  | 9.22  |
| 1639121 at   | FBgn0011745 | 10.71 | 10.75 | 10.82 | 10.94 | 10.76 | 10.69 |
| 1631940 s at | FBgn0000283 | 11.11 | 11.15 | 11.1  | 11.07 | 11.15 | 11.21 |
| 1637552 s at | FBgn0052423 | 8.39  | 8.43  | 8.61  | 8.58  | 8.31  | 8.61  |
| 1630340 at   | FBgn0031638 | 9.16  | 9.2   | 8.92  | 9.18  | 9.22  | 9.28  |
| 1628011 a at | FBgn0039544 | 8.89  | 8.93  | 8.71  | 8.88  | 9.03  | 9.03  |
| 1640822 s at | FBgn0022987 | 6.98  | 7.02  | 6.92  | 7.16  | 7.02  | 7.14  |
| 1625898 s at | FBgn0028717 | 9.25  | 9.29  | 9.24  | 9.4   | 9.43  | 9.35  |
| 1624568 at   | ---         | 7.79  | 7.83  | 7.24  | 7.55  | 7.3   | 7.09  |
| 1636599 at   | FBgn0037491 | 8.86  | 8.9   | 8.81  | 8.94  | 8.88  | 8.91  |
| 1625032 s at | FBgn0016038 | 9.61  | 9.65  | 9.57  | 9.82  | 9.65  | 9.59  |
| 1640561 at   | FBgn0035916 | 9.44  | 9.48  | 9.35  | 9.7   | 9.61  | 9.56  |
| 1624023 at   | FBgn0004103 | 10.24 | 10.29 | 10.58 | 10.55 | 10.61 | 10.57 |
| 1631430 at   | FBgn0012058 | 8.29  | 8.33  | 8.6   | 8.78  | 8.56  | 8.33  |
| 1634700 at   | FBgn0033342 | 11.24 | 11.28 | 11.39 | 11.53 | 11.47 | 11.29 |
| 1629647 at   | FBgn0010612 | 12.29 | 12.33 | 12.45 | 12.54 | 12.38 | 12.34 |
| 1625081 at   | FBgn0031498 | 8.02  | 8.06  | 7.86  | 8.13  | 8.06  | 8.02  |
| 1624097 s at | FBgn0051151 | 8.47  | 8.52  | 8.57  | 8.59  | 8.53  | 8.59  |
| 1638113 at   | ---         | 8.48  | 8.52  | 8.55  | 8.48  | 8.39  | 8.57  |
| 1638765 at   | FBgn0032016 | 9.56  | 9.6   | 9.57  | 9.9   | 9.68  | 9.53  |
| 1630156 at   | ---         | 10.1  | 10.14 | 10.41 | 10.19 | 10.09 | 10.11 |
| 1635358 at   | FBgn0030003 | 9.05  | 9.09  | 9.15  | 9.39  | 9.34  | 9.17  |
| 1631427 s at | FBgn0034691 | 8.81  | 8.85  | 8.87  | 8.97  | 8.85  | 8.81  |
| 1632724 at   | FBgn0010215 | 10.65 | 10.69 | 10.74 | 10.92 | 10.79 | 10.79 |
| 1629968 s at | FBgn0039381 | 8.78  | 8.82  | 8.52  | 8.95  | 8.67  | 8.59  |
| 1627254 at   | FBgn0036510 | 9.49  | 9.53  | 9.56  | 9.64  | 9.72  | 9.65  |
| 1639892 at   | FBgn0024289 | 7.02  | 7.06  | 6.91  | 5.9   | 6.2   | 6.29  |

|              |                         |       |       |       |       |       |       |
|--------------|-------------------------|-------|-------|-------|-------|-------|-------|
| 1627900 at   | ---                     | 9.21  | 9.25  | 9.72  | 9.29  | 9.31  | 9.23  |
| 1623333 a at | ---                     | 7.87  | 7.91  | 7.97  | 7.82  | 7.88  | 7.78  |
| 1624826 at   | FBgn0031990             | 8.56  | 8.6   | 8.65  | 8.36  | 8.45  | 8.51  |
| 1636816 s at | FBgn0028916             | 9.05  | 9.09  | 9.05  | 9.26  | 9.13  | 9.05  |
| 1624858 at   | FBgn0037878             | 10.03 | 10.07 | 10.02 | 10.29 | 10.26 | 10.13 |
| 1640377 s at | FBgn0015286             | 11.51 | 11.55 | 9.97  | 10.21 | 11.26 | 11.39 |
| 1636681 at   | FBgn0031183             | 8.75  | 8.79  | 8.41  | 8.55  | 8.77  | 8.73  |
| 1623481 at   | FBgn0030703             | 10.57 | 10.6  | 9.66  | 10.14 | 10.54 | 10.63 |
| 1632236 at   | ---                     | 9.47  | 9.51  | 9.38  | 9.47  | 9.37  | 9.34  |
| 1635871 at   | FBgn0025724             | 9.29  | 9.33  | 9.5   | 9.42  | 9.29  | 9.25  |
| 1640872 at   | ---                     | 9.04  | 9.08  | 9.24  | 9.11  | 9.02  | 9.03  |
| 1636371 at   | FBgn0029686             | 9.01  | 9.05  | 8.85  | 9.05  | 9.08  | 9.26  |
| 1640589 at   | ---                     | 9.1   | 9.14  | 9.28  | 9.31  | 9.22  | 9.23  |
| 1637065 a at | FBgn0035276 /// FBgn003 | 8.02  | 8.06  | 8.08  | 8.39  | 8.04  | 8.08  |
| 1639242 a at | FBgn0019960             | 9.15  | 9.18  | 9.54  | 9.6   | 9.47  | 9.28  |
| 1639586 at   | FBgn0033206             | 9.05  | 9.09  | 8.86  | 9.15  | 8.95  | 9.06  |
| 1632163 at   | FBgn0037747             | 9.59  | 9.63  | 9.16  | 9.72  | 9.77  | 9.77  |
| 1635638 s at | FBgn0030412             | 9.14  | 9.18  | 9.07  | 8.83  | 9.31  | 9.28  |
| 1627221 at   | FBgn0038574             | 9.53  | 9.57  | 9.52  | 9.68  | 9.56  | 9.63  |
| 1635378 at   | FBgn0037098             | 8.09  | 8.13  | 8.08  | 7.97  | 8.03  | 8.12  |
| 1634733 at   | FBgn0034804             | 10.39 | 10.43 | 10.37 | 10.18 | 10.13 | 10.2  |
| 1635564 at   | FBgn0037150             | 9.05  | 9.08  | 8.8   | 8.87  | 8.98  | 8.94  |
| 1625144 at   | FBgn0034704             | 8.56  | 8.6   | 8.59  | 8.73  | 8.71  | 8.43  |
| 1626280 a at | FBgn0052956             | 10.09 | 10.13 | 10.22 | 10.47 | 10.34 | 10.22 |
| 1624520 a at | FBgn0001078             | 10.49 | 10.53 | 10.29 | 10.23 | 10.19 | 10.49 |
| 1637257 at   | ---                     | 9.78  | 9.82  | 9.75  | 9.67  | 10.02 | 9.76  |
| 1639721 at   | FBgn0030228             | 8.5   | 8.53  | 8.09  | 8.41  | 8.4   | 8.39  |
| 1629629 at   | FBgn0029958             | 9.96  | 10    | 9.91  | 10    | 9.95  | 9.97  |
| 1632338 a at | FBgn0035651             | 9.59  | 9.63  | 9.46  | 9.4   | 9.55  | 9.52  |
| 1639514 at   | FBgn0038811             | 8.37  | 8.41  | 8.64  | 8.24  | 8.24  | 8.38  |
| 1640271 s at | FBgn0025741             | 10.88 | 10.92 | 10.68 | 10.59 | 10.64 | 10.99 |
| 1626162 s at | FBgn0039672             | 8.84  | 8.88  | 9.24  | 9.21  | 9.16  | 8.98  |
| 1625038 s at | FBgn0019686             | 11.89 | 11.93 | 11.9  | 11.97 | 11.94 | 11.94 |
| 1635778 at   | FBgn0033766             | 7.85  | 7.89  | 8.02  | 7.91  | 8.11  | 7.96  |
| 1627003 at   | FBgn0037359             | 8.16  | 8.2   | 8.13  | 8.35  | 8.4   | 8.41  |
| 1640007 at   | FBgn0029718             | 10.56 | 10.59 | 10.69 | 10.73 | 10.47 | 10.46 |

|              |             |       |       |       |       |       |       |
|--------------|-------------|-------|-------|-------|-------|-------|-------|
| 1626259 at   | FBgn0003575 | 8.77  | 8.8   | 8.88  | 8.84  | 8.86  | 8.76  |
| 1627452 a at | FBgn0002441 | 8.84  | 8.87  | 8.48  | 8.72  | 8.93  | 8.83  |
| 1625014 at   | ---         | 9.52  | 9.56  | 9.39  | 9.37  | 9.63  | 9.6   |
| 1631125 at   | FBgn0030353 | 11.19 | 11.23 | 11.18 | 11.25 | 11.27 | 11.33 |
| 1629924 at   | FBgn0039280 | 7.39  | 7.43  | 7.43  | 7.46  | 7.61  | 7.49  |
| 1627702 at   | FBgn0034431 | 9.77  | 9.81  | 9.7   | 9.89  | 9.96  | 9.79  |
| 1631964 at   | FBgn0030012 | 7.72  | 7.76  | 7.56  | 7.8   | 7.84  | 7.63  |
| 1634159 s at | ---         | 8.96  | 9     | 8.89  | 8.76  | 9.01  | 9.14  |
| 1636735 s at | FBgn0034946 | 9.46  | 9.49  | 9.11  | 9.29  | 9.51  | 9.54  |
| 1627794 a at | FBgn0038327 | 8.26  | 8.3   | 8.33  | 8.49  | 8.49  | 8.35  |
| 1636548 at   | FBgn0011211 | 12.31 | 12.35 | 12.62 | 12.56 | 12.48 | 12.39 |
| 1624014 at   | FBgn0035965 | 8.56  | 8.6   | 8.49  | 8.53  | 8.59  | 8.57  |
| 1632370 at   | FBgn0013347 | 10.57 | 10.6  | 10.59 | 10.74 | 10.68 | 10.58 |
| 1634383 a at | FBgn0028425 | 10.08 | 10.12 | 10.41 | 10.16 | 10.08 | 10.13 |
| 1639632 at   | FBgn0037489 | 9.23  | 9.26  | 9.58  | 9.45  | 9.44  | 9.41  |
| 1626565 at   | FBgn0027599 | 8.87  | 8.91  | 8.77  | 9.06  | 8.86  | 8.84  |
| 1630983 s at | ---         | 8.77  | 8.8   | 9.4   | 9.29  | 9.14  | 9.15  |
| 1626154 at   | FBgn0030053 | 8.29  | 8.32  | 8.28  | 8.4   | 8.51  | 8.39  |
| 1634199 at   | ---         | 10.18 | 10.22 | 10.07 | 10.32 | 10.28 | 10.19 |
| 1627945 at   | ---         | 8.47  | 8.5   | 8.3   | 8.29  | 8.37  | 8.52  |
| 1632955 at   | FBgn0011754 | 8.42  | 8.45  | 8.39  | 8.49  | 8.54  | 8.48  |
| 1623869 at   | ---         | 7.26  | 7.3   | 7.2   | 7.49  | 7.43  | 7.46  |
| 1622984 at   | FBgn0010213 | 10.83 | 10.87 | 11.13 | 10.98 | 11.07 | 10.91 |
| 1638801 at   | ---         | 9.96  | 10    | 9.8   | 10.05 | 9.98  | 9.96  |
| 1627116 at   | FBgn0033261 | 9.05  | 9.09  | 9.17  | 9.39  | 9.3   | 9.3   |
| 1633602 at   | FBgn0035624 | 8.35  | 8.38  | 8.34  | 8.46  | 8.5   | 8.53  |
| 1626621 at   | FBgn0033474 | 10.09 | 10.12 | 10.07 | 10.49 | 10.2  | 10.08 |
| 1640311 s at | FBgn0022238 | 10.95 | 10.98 | 10.8  | 10.87 | 10.85 | 11.06 |
| 1630668 a at | FBgn0037374 | 9.37  | 9.41  | 9.29  | 9.28  | 9.48  | 9.51  |
| 1629920 at   | FBgn0024889 | 10.42 | 10.45 | 10.36 | 10.42 | 10.48 | 10.39 |
| 1636886 at   | FBgn0003483 | 10.09 | 10.13 | 10.14 | 10.31 | 10.06 | 10.08 |
| 1623285 at   | FBgn0030245 | 9.66  | 9.69  | 9.26  | 9.17  | 9.56  | 9.64  |
| 1623231 at   | FBgn0040228 | 8.29  | 8.33  | 8.34  | 8.61  | 8.37  | 8.34  |
| 1635761 at   | FBgn0005642 | 9.82  | 9.86  | 9.56  | 9.83  | 10    | 9.93  |
| 1627546 at   | FBgn0035769 | 9.47  | 9.51  | 9.23  | 9.43  | 9.46  | 9.42  |
| 1632123 at   | FBgn0032915 | 9.14  | 9.17  | 9.43  | 9.22  | 9.16  | 9.13  |

|              |             |       |       |       |       |       |       |
|--------------|-------------|-------|-------|-------|-------|-------|-------|
| 1630705 at   | FBgn0037843 | 8.74  | 8.78  | 8.66  | 8.73  | 8.88  | 8.91  |
| 1628482 at   | FBgn0029959 | 8.98  | 9.01  | 8.91  | 8.94  | 9.15  | 9.08  |
| 1639392 at   | ---         | 10.68 | 10.72 | 10.9  | 10.61 | 10.58 | 10.7  |
| 1637557 a at | FBgn0036357 | 9.26  | 9.3   | 9.22  | 9.58  | 9.34  | 9.13  |
| 1623021 at   | FBgn0026380 | 11.86 | 11.9  | 11.9  | 12.03 | 11.85 | 11.72 |
| 1623366 at   | FBgn0037608 | 9.43  | 9.47  | 9.71  | 9.73  | 9.55  | 9.45  |
| 1628044 at   | FBgn0039115 | 9.72  | 9.76  | 9.87  | 9.99  | 9.9   | 9.96  |
| 1631240 at   | FBgn0011336 | 10    | 10.04 | 10.22 | 9.75  | 9.6   | 9.98  |
| 1640462 at   | FBgn0037933 | 9.72  | 9.76  | 9.69  | 9.87  | 9.75  | 9.75  |
| 1631996 at   | FBgn0036613 | 9.1   | 9.14  | 9.54  | 9.72  | 9.41  | 9.27  |
| 1641714 at   | FBgn0033543 | 7.2   | 7.23  | 7     | 6.89  | 7.41  | 7.2   |
| 1623955 at   | FBgn0035953 | 8.15  | 8.19  | 8.34  | 8.34  | 8.28  | 8.25  |
| 1632355 at   | ---         | 9.34  | 9.37  | 9.2   | 9.23  | 9.58  | 9.75  |
| 1637410 s at | FBgn0002121 | 8.25  | 8.28  | 8.58  | 8.96  | 8.11  | 8.46  |
| 1640456 at   | FBgn0031606 | 8.06  | 8.09  | 8.23  | 8.43  | 8.2   | 7.9   |
| 1632663 at   | FBgn0037134 | 9.83  | 9.86  | 9.6   | 10.2  | 10.07 | 9.93  |
| 1632384 at   | FBgn0028926 | 7.68  | 7.72  | 7.76  | 7.65  | 7.96  | 7.83  |
| 1627020 at   | FBgn0034535 | 8.85  | 8.88  | 8.95  | 8.88  | 8.98  | 8.94  |
| 1628613 a at | FBgn0050492 | 9.66  | 9.69  | 9.62  | 9.22  | 9.61  | 9.76  |
| 1630688 at   | FBgn0001233 | 13.42 | 13.46 | 13.6  | 13.68 | 13.53 | 13.47 |
| 1641648 at   | FBgn0040396 | 9.88  | 9.92  | 10.08 | 10.42 | 10.04 | 10.01 |
| 1634504 a at | ---         | 9.73  | 9.76  | 9.62  | 9.63  | 9.71  | 9.67  |
| 1632736 at   | FBgn0030944 | 9.37  | 9.41  | 9.36  | 9.42  | 9.43  | 9.28  |
| 1629841 at   | FBgn0040298 | 8.17  | 8.21  | 8.71  | 8.64  | 8.22  | 8.3   |
| 1630637 s at | FBgn0001219 | 13.42 | 13.45 | 13.52 | 13.48 | 13.46 | 13.39 |
| 1631579 a at | FBgn0016081 | 8.3   | 8.33  | 8.45  | 8.46  | 8.43  | 8.27  |
| 1628710 at   | FBgn0036919 | 8.92  | 8.96  | 8.79  | 8.82  | 8.95  | 8.96  |
| 1628321 at   | FBgn0032354 | 9.29  | 9.32  | 8.9   | 9.38  | 9.54  | 9.45  |
| 1625775 a at | FBgn0000382 | 9.03  | 9.07  | 8.76  | 8.93  | 9.03  | 9.15  |
| 1634168 s at | FBgn0039163 | 10.17 | 10.21 | 10.25 | 10.33 | 10.25 | 10.26 |
| 1641027 at   | FBgn0043458 | 8.77  | 8.8   | 8.86  | 8.93  | 8.73  | 8.82  |
| 1627492 at   | FBgn0036578 | 9.76  | 9.79  | 9.95  | 9.97  | 9.79  | 9.82  |
| 1638614 at   | FBgn0029525 | 9.23  | 9.27  | 9.32  | 9.04  | 9.24  | 9.16  |
| 1629021 at   | FBgn0034989 | 8.98  | 9.02  | 9.13  | 9.24  | 9.03  | 8.92  |
| 1634434 at   | ---         | 8.51  | 8.54  | 8.34  | 8.45  | 8.57  | 8.53  |
| 1634695 at   | FBgn0002542 | 9.98  | 10.01 | 9.77  | 10.13 | 10    | 9.9   |

|              |                         |       |       |       |       |       |       |
|--------------|-------------------------|-------|-------|-------|-------|-------|-------|
| 1638030 at   | FBgn0033104             | 8.26  | 8.29  | 8.3   | 8.31  | 8.47  | 8.25  |
| 1630984 at   | FBgn0010217             | 11.73 | 11.77 | 11.76 | 11.72 | 11.61 | 11.72 |
| 1634696 at   | FBgn0039004             | 8.68  | 8.72  | 8.89  | 9.24  | 8.85  | 8.76  |
| 1630823 at   | ---                     | 8.67  | 8.71  | 8.96  | 8.84  | 8.8   | 8.7   |
| 1635667 at   | FBgn0051108 /// FBgn005 | 9.72  | 9.75  | 9.5   | 9.75  | 9.76  | 9.66  |
| 1624431 at   | FBgn0033085             | 8.87  | 8.9   | 9.19  | 9.06  | 8.86  | 8.87  |
| 1624894 s at | FBgn0005776             | 10.09 | 10.13 | 10.2  | 10.3  | 10.16 | 10.16 |
| 1637650 at   | FBgn0031256             | 9.85  | 9.88  | 9.82  | 10.35 | 9.96  | 9.87  |
| 1632844 s at | FBgn0035236             | 9.84  | 9.87  | 9.75  | 9.71  | 9.88  | 9.9   |
| 1635892 at   | FBgn0038577             | 9.95  | 9.98  | 9.95  | 10.4  | 9.93  | 9.63  |
| 1635123 at   | ---                     | 9.37  | 9.4   | 9.22  | 9.23  | 9.43  | 9.31  |
| 1624639 at   | FBgn0039626             | 7.59  | 7.62  | 7.64  | 7.72  | 7.7   | 7.74  |
| 1639761 s at | FBgn0004921             | 11.5  | 11.53 | 11.67 | 11.42 | 11.49 | 11.59 |
| 1632577 a at | FBgn0003600             | 10.87 | 10.9  | 11.2  | 11.16 | 11.12 | 11.02 |
| 1635630 a at | FBgn0003475             | 8.98  | 9.02  | 8.77  | 8.95  | 9.04  | 9.13  |
| 1641196 at   | FBgn0037737             | 9.26  | 9.29  | 9.21  | 9.46  | 9.23  | 9.3   |
| 1632146 a at | FBgn0027579             | 10.71 | 10.75 | 10.63 | 10.56 | 10.34 | 10.5  |
| 1632258 s at | FBgn0044823             | 9.55  | 9.58  | 9.71  | 9.95  | 9.91  | 9.77  |
| 1624779 at   | FBgn0035524             | 10.23 | 10.26 | 10.56 | 10.52 | 10.23 | 10.28 |
| 1625866 at   | FBgn0020645             | 6.94  | 6.97  | 6.73  | 6.84  | 7.05  | 7     |
| 1624693 at   | FBgn0013749             | 11.65 | 11.68 | 11.68 | 11.81 | 11.69 | 11.76 |
| 1634687 at   | FBgn0035541             | 10.25 | 10.28 | 10.54 | 10.29 | 10.21 | 10.21 |
| 1631687 at   | FBgn0020620             | 8.27  | 8.31  | 7.97  | 8.24  | 8.38  | 8.56  |
| 1626543 at   | FBgn0035869             | 8.95  | 8.98  | 8.77  | 8.95  | 9.08  | 9.07  |
| 1636006 at   | FBgn0023510             | 9.3   | 9.33  | 9.3   | 9.21  | 9.23  | 9.31  |
| 1632998 at   | FBgn0027490             | 8.33  | 8.36  | 8.24  | 8.5   | 8.49  | 8.38  |
| 1638711 at   | FBgn0039175             | 9.34  | 9.37  | 9.57  | 9.54  | 9.57  | 9.38  |
| 1625994 a at | FBgn0038474             | 9.58  | 9.61  | 9.79  | 9.91  | 9.79  | 9.8   |
| 1637509 s at | FBgn0027360             | 11.08 | 11.11 | 11.2  | 11.15 | 11.19 | 11.07 |
| 1635915 at   | FBgn0023167             | 10.79 | 10.82 | 11.03 | 10.91 | 10.71 | 10.84 |
| 1623572 at   | FBgn0028974             | 7.16  | 7.19  | 6.98  | 7.55  | 7.27  | 7.17  |
| 1639853 at   | FBgn0038252             | 11.48 | 11.52 | 11.46 | 11.72 | 11.68 | 11.69 |
| 1631078 at   | FBgn0024177             | 11.27 | 11.3  | 11.32 | 11.5  | 11.55 | 11.55 |
| 1631620 at   | ---                     | 10.73 | 10.76 | 11.03 | 11.09 | 10.83 | 10.66 |
| 1623647 at   | FBgn0033349             | 10.57 | 10.6  | 10.68 | 10.87 | 10.66 | 10.53 |
| 1637783 at   | FBgn0035435             | 7.74  | 7.77  | 7.28  | 7.76  | 7.93  | 7.83  |

|              |                         |       |       |       |       |       |       |
|--------------|-------------------------|-------|-------|-------|-------|-------|-------|
| 1627394 s at | FBgn0000097             | 9.26  | 9.29  | 9.11  | 8.97  | 8.9   | 9.18  |
| 1625836 at   | FBgn0032149             | 8.43  | 8.46  | 8.74  | 8.41  | 8.51  | 8.44  |
| 1632559 at   | FBgn0003268             | 8.34  | 8.37  | 8.24  | 8.58  | 8.48  | 8.27  |
| 1638257 at   | FBgn0037342             | 8.96  | 8.99  | 8.86  | 9.09  | 9.16  | 9.12  |
| 1623053 a at | FBgn0034345             | 10.04 | 10.07 | 10.03 | 9.86  | 10.05 | 10.08 |
| 1637887 at   | FBgn0030321             | 10.48 | 10.51 | 10.59 | 10.33 | 10.32 | 10.39 |
| 1641297 at   | FBgn0002431             | 10.4  | 10.43 | 10.58 | 10.3  | 10.4  | 10.44 |
| 1632318 at   | FBgn0024365             | 8.95  | 8.98  | 8.93  | 9.03  | 8.79  | 8.89  |
| 1625972 at   | ---                     | 7.42  | 7.45  | 7.88  | 7.6   | 7.07  | 6.68  |
| 1628141 at   | ---                     | 10.06 | 10.09 | 10.08 | 8.82  | 9.94  | 10.11 |
| 1632713 at   | FBgn0002962             | 12.33 | 12.36 | 12.07 | 12.31 | 12.25 | 12.3  |
| 1628161 at   | FBgn0034118             | 9.73  | 9.76  | 10.03 | 10.12 | 10    | 9.89  |
| 1629977 at   | FBgn0030743             | 10.29 | 10.32 | 10.48 | 10.66 | 10.66 | 10.47 |
| 1623726 at   | FBgn0037611             | 8.58  | 8.61  | 8.42  | 9.05  | 8.72  | 8.53  |
| 1641438 at   | ---                     | 8.79  | 8.82  | 8.83  | 9.06  | 8.85  | 8.75  |
| 1638929 at   | FBgn0027529             | 10.05 | 10.08 | 10.07 | 10.06 | 9.82  | 9.99  |
| 1629432 at   | FBgn0036990             | 9.75  | 9.78  | 10.03 | 9.97  | 9.73  | 9.77  |
| 1631577 a at | ---                     | 11.19 | 11.22 | 11.37 | 11.32 | 11.35 | 11.4  |
| 1637954 at   | FBgn0038049             | 10.11 | 10.14 | 10.08 | 10.37 | 10.13 | 10.13 |
| 1624134 a at | FBgn0034650             | 9.99  | 10.02 | 9.75  | 10.04 | 10.17 | 10.14 |
| 1629887 at   | FBgn0034021             | 10.28 | 10.31 | 10.22 | 10.4  | 10.25 | 10.24 |
| 1631479 at   | FBgn0002283             | 10.3  | 10.33 | 10.05 | 10.03 | 10.3  | 10.38 |
| 1634307 at   | FBgn0030685             | 10.35 | 10.38 | 10.39 | 10.24 | 10.4  | 10.53 |
| 1638052 at   | ---                     | 11.41 | 11.44 | 11.47 | 11.58 | 11.7  | 11.68 |
| 1633417 at   | ---                     | 12.17 | 12.2  | 12.04 | 12    | 12.21 | 12.18 |
| 1630543 at   | ---                     | 8.2   | 8.23  | 8.31  | 8.4   | 8.56  | 8.47  |
| 1624521 a at | FBgn0023537             | 10.69 | 10.71 | 11.04 | 10.92 | 11.02 | 10.91 |
| 1625421 at   | FBgn0050377             | 9.96  | 9.99  | 9.98  | 9.85  | 9.84  | 9.77  |
| 1630606 at   | FBgn0040475             | 8.8   | 8.82  | 8.79  | 8.98  | 8.82  | 8.81  |
| 1623900 a at | FBgn0032382             | 8.21  | 8.24  | 7.91  | 8.55  | 8.14  | 7.78  |
| 1639206 at   | FBgn0030700             | 7.31  | 7.34  | 7.05  | 7.37  | 7.27  | 7.24  |
| 1641707 at   | FBgn0036136             | 9.89  | 9.92  | 9.88  | 10.14 | 9.86  | 9.7   |
| 1624361 s at | FBgn0010488             | 11.65 | 11.68 | 11.85 | 11.93 | 11.74 | 11.67 |
| 1637149 s at | FBgn0035498 /// FBgn002 | 10.16 | 10.19 | 10.12 | 9.96  | 10.03 | 10.11 |
| 1634289 at   | FBgn0003210             | 8.41  | 8.44  | 8.68  | 8.67  | 8.32  | 8.5   |
| 1638593 a at | FBgn0017566             | 9.33  | 9.36  | 9.56  | 9.72  | 9.42  | 9.23  |

|              |             |       |       |       |       |       |       |
|--------------|-------------|-------|-------|-------|-------|-------|-------|
| 1631006 a at | FBgn0036353 | 9.33  | 9.36  | 9.37  | 9.45  | 9.4   | 9.39  |
| 1637720 at   | FBgn0036819 | 7.4   | 7.43  | 7.27  | 7.76  | 7.57  | 7.55  |
| 1639715 at   | ---         | 9.11  | 9.14  | 8.94  | 9.04  | 8.94  | 9     |
| 1636679 at   | FBgn0052296 | 7.22  | 7.25  | 7.65  | 7.62  | 7.31  | 7.15  |
| 1624012 at   | FBgn0031231 | 10.38 | 10.41 | 10.33 | 10.58 | 10.25 | 10.24 |
| 1638837 a at | FBgn0053066 | 8.26  | 8.29  | 8.23  | 8.18  | 8.02  | 8.15  |
| 1638690 at   | FBgn0035639 | 10.47 | 10.5  | 10.38 | 10.48 | 10.49 | 10.55 |
| 1625945 a at | FBgn0035137 | 8.42  | 8.45  | 7.89  | 8.3   | 8.34  | 8.55  |
| 1623271 a at | FBgn0001281 | 10.51 | 10.54 | 10.66 | 10.56 | 10.53 | 10.61 |
| 1636071 a at | FBgn0022942 | 8.98  | 9.01  | 8.73  | 8.97  | 9.03  | 8.92  |
| 1625481 a at | FBgn0004795 | 11.39 | 11.42 | 11.25 | 11.14 | 11.33 | 11.41 |
| 1635979 at   | ---         | 9     | 9.03  | 8.86  | 8.89  | 9.04  | 9.03  |
| 1628323 s at | FBgn0004646 | 8.38  | 8.41  | 9.17  | 8.49  | 7.84  | 8.27  |
| 1641058 at   | FBgn0035529 | 9.93  | 9.96  | 9.97  | 9.83  | 10.04 | 9.99  |
| 1628901 at   | ---         | 9.32  | 9.34  | 9.18  | 9.13  | 9.63  | 9.65  |
| 1636073 at   | ---         | 8.89  | 8.92  | 9.09  | 8.92  | 8.8   | 8.84  |
| 1637489 at   | FBgn0026079 | 7.82  | 7.85  | 8.39  | 8.01  | 7.7   | 7.62  |
| 1633363 at   | FBgn0029689 | 9.23  | 9.26  | 9.13  | 9.33  | 9.23  | 9.07  |
| 1639228 at   | FBgn0011741 | 9.4   | 9.43  | 9.38  | 9.36  | 9.43  | 9.3   |
| 1641676 at   | FBgn0031298 | 8.58  | 8.61  | 8.46  | 8.65  | 8.66  | 8.64  |
| 1629401 s at | FBgn0033426 | 7.42  | 7.45  | 7.69  | 7.57  | 7.51  | 7.37  |
| 1638012 at   | FBgn0003292 | 8.22  | 8.25  | 7.83  | 8.26  | 8.45  | 8.35  |
| 1639951 at   | FBgn0032871 | 8.61  | 8.63  | 8.5   | 8.37  | 8.32  | 8.46  |
| 1638297 at   | FBgn0030099 | 7.85  | 7.87  | 7.79  | 7.88  | 7.82  | 7.65  |
| 1640659 s at | FBgn0036685 | 9.25  | 9.28  | 9.44  | 9.62  | 9.26  | 9.29  |
| 1638208 at   | FBgn0033783 | 10.08 | 10.11 | 10.08 | 9.92  | 10.06 | 10.09 |
| 1632840 s at | FBgn0023441 | 9.21  | 9.24  | 9.29  | 9.01  | 9.11  | 9.14  |
| 1623306 at   | FBgn0031105 | 9.06  | 9.09  | 9.43  | 9.16  | 9.23  | 9.14  |
| 1636225 at   | FBgn0028980 | 9.06  | 9.08  | 8.88  | 9.2   | 9.3   | 9.27  |
| 1636553 at   | FBgn0029813 | 6.85  | 6.88  | 7.34  | 7.27  | 7.17  | 6.99  |
| 1628008 a at | FBgn0024923 | 11.91 | 11.94 | 12    | 12.23 | 11.89 | 11.75 |
| 1626738 at   | FBgn0031300 | 8.21  | 8.24  | 8.37  | 8.35  | 8.43  | 8.24  |
| 1626483 at   | ---         | 9.12  | 9.15  | 9.08  | 9.24  | 9.11  | 9.06  |
| 1636291 at   | FBgn0034646 | 10.09 | 10.12 | 10.17 | 10.46 | 10.19 | 10.14 |
| 1633698 at   | FBgn0011455 | 11.1  | 11.13 | 11.46 | 11.34 | 11.27 | 11.31 |
| 1634096 at   | FBgn0032114 | 11.5  | 11.53 | 11.48 | 11.65 | 11.58 | 11.47 |



|              |                         |       |       |       |       |       |       |
|--------------|-------------------------|-------|-------|-------|-------|-------|-------|
| 1634705 at   | FBgn0032701             | 8.49  | 8.52  | 8.79  | 8.45  | 8.42  | 8.4   |
| 1630115 at   | FBgn0030694             | 8.6   | 8.63  | 8.87  | 8.95  | 8.8   | 8.7   |
| 1630384 at   | FBgn0031875             | 9.35  | 9.38  | 9.27  | 9.57  | 9.55  | 9.34  |
| 1639522 at   | FBgn0051950             | 8.48  | 8.51  | 8.51  | 8.78  | 8.58  | 8.49  |
| 1630290 at   | FBgn0039211             | 9.14  | 9.17  | 9.11  | 9.16  | 9     | 9.12  |
| 1640599 at   | FBgn0020513             | 10.32 | 10.35 | 10.68 | 10.53 | 10.42 | 10.4  |
| 1636160 at   | FBgn0032863 /// FBgn005 | 8.41  | 8.44  | 8.38  | 8.41  | 8.62  | 8.43  |
| 1633008 at   | FBgn0033121             | 9.19  | 9.22  | 8.95  | 9.06  | 9.2   | 9.18  |
| 1629655 at   | FBgn0029512             | 11.25 | 11.28 | 11.33 | 11.76 | 11.54 | 11.35 |
| 1637027 s at | FBgn0032801             | 7.54  | 7.57  | 7.35  | 7.27  | 7.72  | 7.71  |
| 1634739 a at | FBgn0003071             | 9.71  | 9.74  | 9.62  | 9.52  | 9.8   | 9.62  |
| 1641318 at   | FBgn0037687             | 9.13  | 9.16  | 9.23  | 9.41  | 9.2   | 9.02  |
| 1636464 at   | FBgn0038269             | 8.18  | 8.21  | 8.45  | 8.49  | 8.29  | 8.17  |
| 1641309 s at | FBgn0011604             | 9.4   | 9.43  | 9.5   | 9.63  | 9.53  | 9.43  |
| 1625713 at   | FBgn0036330             | 8.19  | 8.22  | 7.95  | 8.44  | 7.6   | 7.32  |
| 1639494 at   | FBgn0029004             | 8.4   | 8.42  | 8.61  | 9     | 8.46  | 8.44  |
| 1636243 at   | FBgn0034921             | 8.96  | 8.99  | 9.01  | 9.32  | 9.28  | 9.21  |
| 1626755 at   | FBgn0050085             | 9.62  | 9.65  | 9.45  | 9.68  | 9.73  | 9.59  |
| 1639663 at   | FBgn0038316             | 9.07  | 9.09  | 8.98  | 9.24  | 9.21  | 9.17  |
| 1635016 at   | FBgn0032054             | 8.69  | 8.72  | 8.62  | 8.7   | 8.8   | 8.68  |
| 1630557 at   | FBgn0039306             | 9.53  | 9.55  | 9.71  | 9.67  | 9.63  | 9.64  |
| 1628785 at   | FBgn0010830             | 9.88  | 9.91  | 9.77  | 9.94  | 9.98  | 9.97  |
| 1635377 at   | FBgn0033884             | 8.71  | 8.74  | 8.67  | 8.91  | 8.79  | 8.83  |
| 1641226 a at | FBgn0043884             | 9.67  | 9.7   | 9.85  | 9.95  | 9.73  | 9.69  |
| 1636029 s at | FBgn0030718             | 10.54 | 10.57 | 10.54 | 10.47 | 10.61 | 10.52 |
| 1623472 at   | FBgn0030805             | 8.96  | 8.99  | 8.89  | 9.22  | 9.15  | 9.1   |
| 1637101 at   | FBgn0039861             | 7.7   | 7.73  | 7.72  | 7.89  | 7.82  | 7.85  |
| 1635342 at   | FBgn0034654             | 11.14 | 11.17 | 11.17 | 11.35 | 11.22 | 11.08 |
| 1624744 a at | FBgn0013718             | 8.83  | 8.85  | 9.11  | 9.01  | 8.68  | 8.94  |
| 1638864 at   | FBgn0015789             | 10.95 | 10.97 | 10.71 | 10.58 | 10.86 | 10.95 |
| 1623108 at   | FBgn0033081             | 11.59 | 11.62 | 11.45 | 11.75 | 11.72 | 11.65 |
| 1626454 at   | FBgn0015625             | 11.37 | 11.39 | 11.19 | 11.43 | 11.26 | 11.35 |
| 1631766 at   | FBgn0033751             | 9.63  | 9.66  | 9.63  | 9.69  | 9.78  | 9.59  |
| 1624390 a at | FBgn0035110             | 9.62  | 9.65  | 9.88  | 9.89  | 9.82  | 9.78  |
| 1626615 at   | ---                     | 7.75  | 7.77  | 7.59  | 7.92  | 7.78  | 7.69  |
| 1635021 at   | FBgn0029088             | 8.44  | 8.47  | 8.27  | 8.24  | 8.5   | 8.49  |

|              |                         |       |       |       |       |       |       |
|--------------|-------------------------|-------|-------|-------|-------|-------|-------|
| 1626370 at   | FBgn0042107             | 8.84  | 8.86  | 8.93  | 8.92  | 8.8   | 8.63  |
| 1641568 a at | FBgn0039265             | 9.98  | 10.01 | 10    | 10.33 | 10.16 | 10.13 |
| 1624157 at   | FBgn0033734 /// FBgn003 | 10.56 | 10.59 | 10.15 | 10.79 | 10.31 | 10.21 |
| 1632897 at   | FBgn0039188             | 8.9   | 8.92  | 8.76  | 8.71  | 8.83  | 8.89  |
| 1627173 at   | FBgn0030076             | 8.84  | 8.86  | 8.79  | 8.96  | 8.83  | 8.65  |
| 1637359 at   | FBgn0030608             | 11.92 | 11.94 | 11.44 | 11.59 | 11.66 | 11.68 |
| 1628595 at   | FBgn0015321             | 10.08 | 10.11 | 9.87  | 10.19 | 10.29 | 10.34 |
| 1626801 at   | FBgn0036290             | 9.83  | 9.85  | 9.91  | 9.99  | 10.03 | 10    |
| 1633961 s at | ---                     | 10.31 | 10.33 | 10.17 | 10.17 | 10.24 | 10.4  |
| 1628420 s at | FBgn0037944             | 8.42  | 8.45  | 8.07  | 8.37  | 8.53  | 8.61  |
| 1639763 at   | ---                     | 9.84  | 9.86  | 10.05 | 10.2  | 9.99  | 9.92  |
| 1638229 at   | FBgn0010741             | 11.4  | 11.43 | 11.44 | 11.41 | 11.39 | 11.32 |
| 1635473 at   | FBgn0051713             | 7.73  | 7.76  | 7.87  | 7.97  | 7.83  | 7.76  |
| 1635208 at   | FBgn0032467             | 8.86  | 8.88  | 8.9   | 8.94  | 8.81  | 8.75  |
| 1638784 s at | ---                     | 7.76  | 7.78  | 7.7   | 8.05  | 7.92  | 7.92  |
| 1632670 at   | FBgn0036389             | 9.71  | 9.74  | 9.78  | 9.49  | 9.59  | 9.59  |
| 1641188 a at | FBgn0027574             | 8.22  | 8.25  | 8.12  | 8.26  | 8.29  | 8.33  |
| 1637220 s at | FBgn0037655             | 10.34 | 10.36 | 10.39 | 10.61 | 10.41 | 10.26 |
| 1626653 a at | FBgn0024891             | 8.77  | 8.79  | 8.7   | 8.58  | 8.77  | 8.75  |
| 1624392 s at | FBgn0011672             | 9.17  | 9.19  | 9.31  | 9.55  | 9.35  | 9.42  |
| 1626817 at   | FBgn0030789             | 8.3   | 8.33  | 8.37  | 8.28  | 8.29  | 8.39  |
| 1623633 at   | FBgn0015359             | 9.86  | 9.89  | 10.14 | 10.12 | 10.09 | 10.02 |
| 1628913 at   | FBgn0052365             | 8.64  | 8.67  | 8.57  | 8.75  | 8.65  | 8.67  |
| 1633918 s at | FBgn0027515             | 10.16 | 10.18 | 10.08 | 10.21 | 10.06 | 10.1  |
| 1632548 a at | FBgn0037207             | 9.48  | 9.51  | 9.34  | 9.48  | 9.7   | 9.71  |
| 1640333 at   | FBgn0033055             | 9.06  | 9.08  | 8.95  | 9.17  | 9.13  | 9.02  |
| 1624365 at   | FBgn0034308             | 9.01  | 9.03  | 8.74  | 8.81  | 8.99  | 8.82  |
| 1636639 at   | FBgn0031260             | 10.25 | 10.27 | 10.48 | 10.15 | 10.13 | 10.41 |
| 1636336 at   | FBgn0031189             | 8.67  | 8.69  | 8.74  | 8.57  | 8.66  | 8.76  |
| 1623807 a at | ---                     | 9.81  | 9.84  | 10.07 | 10.02 | 9.94  | 9.77  |
| 1641246 at   | FBgn0036038             | 7.44  | 7.46  | 7.75  | 7.92  | 7.73  | 7.57  |
| 1631139 a at | FBgn0004811             | 9.67  | 9.7   | 9.31  | 9.44  | 9.68  | 9.8   |
| 1629150 at   | FBgn0033035             | 10.85 | 10.88 | 10.82 | 10.94 | 11.03 | 10.97 |
| 1627462 a at | FBgn0038735             | 7.07  | 7.1   | 7.36  | 7.42  | 7.39  | 7.19  |
| 1635843 at   | FBgn0031773             | 8.49  | 8.51  | 8.64  | 8.6   | 8.52  | 8.55  |
| 1630076 at   | FBgn0024352             | 11.87 | 11.89 | 12.05 | 12.03 | 11.94 | 11.95 |

|              |                         |       |       |       |       |       |       |
|--------------|-------------------------|-------|-------|-------|-------|-------|-------|
| 1632364 at   | ---                     | 9.13  | 9.16  | 9.46  | 9.78  | 9.24  | 8.96  |
| 1635996 at   | FBgn0035911             | 9.86  | 9.88  | 9.62  | 9.89  | 9.73  | 9.68  |
| 1636514 at   | FBgn0026323             | 9.61  | 9.64  | 9.38  | 9.38  | 9.51  | 9.48  |
| 1627062 s at | FBgn0030571             | 8.5   | 8.53  | 8.35  | 8.57  | 8.61  | 8.65  |
| 1632475 at   | FBgn0010909             | 9.28  | 9.3   | 9.41  | 9.43  | 9.45  | 9.47  |
| 1629632 at   | FBgn0037689             | 7.86  | 7.88  | 7.7   | 7.64  | 7.93  | 7.83  |
| 1640288 s at | FBgn0036974             | 11.71 | 11.73 | 11.8  | 11.86 | 11.73 | 11.63 |
| 1639447 at   | FBgn0039829             | 8.54  | 8.56  | 8.96  | 8.67  | 8.64  | 8.6   |
| 1630721 s at | FBgn0037218             | 10.4  | 10.43 | 10.3  | 10.16 | 10.49 | 10.55 |
| 1630246 at   | FBgn0040890             | 9.95  | 9.98  | 9.66  | 9.62  | 9.86  | 9.8   |
| 1635588 at   | ---                     | 8.98  | 9     | 9.26  | 9.35  | 9.14  | 9.12  |
| 1630416 at   | FBgn0024887             | 9.01  | 9.03  | 8.96  | 9.11  | 9.17  | 9.18  |
| 1636977 at   | FBgn0032880             | 8.91  | 8.93  | 9.2   | 9.17  | 9.02  | 9.03  |
| 1628240 at   | FBgn0037010             | 10.06 | 10.09 | 10.07 | 10.21 | 10.11 | 10.06 |
| 1636858 at   | FBgn0027106 /// FBgn000 | 8.64  | 8.66  | 8.29  | 8.61  | 8.5   | 8.51  |
| 1629844 s at | FBgn0003200             | 10.08 | 10.11 | 9.95  | 10.02 | 10.07 | 10.13 |
| 1629602 at   | FBgn0031044             | 9.21  | 9.24  | 9.05  | 9.03  | 9.32  | 9.39  |
| 1633965 at   | FBgn0037001             | 10.33 | 10.35 | 10.8  | 10.65 | 10.59 | 10.38 |
| 1627589 s at | FBgn0032078             | 10.22 | 10.24 | 10.11 | 9.72  | 9.91  | 10.05 |
| 1640445 at   | FBgn0037374             | 9.78  | 9.8   | 9.68  | 9.43  | 9.75  | 9.88  |
| 1624208 s at | FBgn0013750             | 9.9   | 9.93  | 9.83  | 9.85  | 9.89  | 10.2  |
| 1634887 at   | FBgn0026567             | 11.07 | 11.1  | 11.06 | 10.91 | 11.06 | 11.12 |
| 1626320 at   | FBgn0051344             | 8.74  | 8.76  | 8.73  | 8.86  | 8.77  | 8.86  |
| 1641235 at   | FBgn0036906             | 7.36  | 7.38  | 6.98  | 7.21  | 7.65  | 7.58  |
| 1632484 at   | FBgn0039767             | 10.44 | 10.46 | 10.22 | 10.54 | 10.52 | 10.54 |
| 1633163 at   | FBgn0027792             | 9.15  | 9.18  | 9.16  | 9.14  | 9.21  | 9.03  |
| 1632202 at   | FBgn0036286             | 9.01  | 9.03  | 8.81  | 8.92  | 9.02  | 9     |
| 1632220 s at | FBgn0039792 /// FBgn000 | 13.8  | 13.82 | 13.92 | 13.9  | 13.85 | 13.79 |
| 1632576 at   | FBgn0030871             | 9.26  | 9.28  | 9.15  | 9.4   | 9.62  | 9.41  |
| 1624685 at   | FBgn0052190             | 9.03  | 9.06  | 9.43  | 9.17  | 9.16  | 9.22  |
| 1628172 at   | FBgn0027948             | 10.57 | 10.59 | 10.78 | 10.69 | 10.77 | 10.73 |
| 1629930 s at | FBgn0041342             | 8.71  | 8.73  | 8.92  | 8.69  | 8.57  | 8.62  |
| 1637442 at   | FBgn0020245             | 8.81  | 8.83  | 8.74  | 8.6   | 8.67  | 8.69  |
| AFFX-r2-Dro  | FBgn0000042             | 10.68 | 10.71 | 10.46 | 10.44 | 10.54 | 10.51 |
| 1638310 at   | FBgn0001565             | 10.44 | 10.46 | 10.64 | 10.59 | 10.72 | 10.55 |
| 1634863 at   | FBgn0024558             | 7.83  | 7.85  | 7.82  | 8.31  | 8     | 7.89  |

|              |             |       |       |       |       |       |       |
|--------------|-------------|-------|-------|-------|-------|-------|-------|
| 1634917 at   | FBgn0026372 | 13.81 | 13.83 | 14.1  | 14.04 | 13.96 | 13.92 |
| 1636606 at   | FBgn0038524 | 9.19  | 9.21  | 8.74  | 8.94  | 9.18  | 9.09  |
| 1629217 at   | FBgn0051258 | 9.42  | 9.44  | 9.55  | 9.67  | 9.73  | 9.58  |
| 1639953 at   | FBgn0003015 | 12.35 | 12.38 | 12.43 | 12.33 | 12.11 | 12.3  |
| 1626972 at   | FBgn0039634 | 10.02 | 10.04 | 9.9   | 9.99  | 9.96  | 9.97  |
| 1641233 a at | FBgn0025937 | 7.88  | 7.9   | 7.88  | 8.18  | 7.88  | 7.76  |
| 1631286 at   | FBgn0026738 | 9.36  | 9.39  | 9.3   | 9.5   | 9.45  | 9.49  |
| 1626196 at   | FBgn0025678 | 10.32 | 10.34 | 10.21 | 10.34 | 10.35 | 10.35 |
| 1630090 at   | ---         | 8.08  | 8.1   | 8.18  | 8.54  | 8.36  | 8.19  |
| 1626033 at   | FBgn0034110 | 8.07  | 8.09  | 8.22  | 8.17  | 8.15  | 8.12  |
| 1636561 at   | FBgn0031413 | 7.83  | 7.85  | 7.75  | 7.81  | 8     | 7.8   |
| 1633660 at   | FBgn0015271 | 9.38  | 9.4   | 9.32  | 9.51  | 9.44  | 9.24  |
| 1638884 at   | FBgn0031384 | 6.95  | 6.97  | 7     | 6.98  | 7     | 7     |
| 1635828 at   | FBgn0035499 | 11.27 | 11.29 | 11.33 | 10.93 | 10.96 | 11.22 |
| 1626191 at   | FBgn0032717 | 7.07  | 7.09  | 6.96  | 7.02  | 7.11  | 7.07  |
| 1638999 at   | ---         | 7.22  | 7.24  | 6.91  | 7.08  | 7.29  | 7.17  |
| 1631334 at   | FBgn0040335 | 9.43  | 9.45  | 9.26  | 9.06  | 9.36  | 9.44  |
| 1625112 at   | FBgn0011715 | 10.83 | 10.85 | 10.72 | 11    | 10.9  | 10.8  |
| 1631196 at   | ---         | 9.65  | 9.67  | 9.81  | 9.89  | 9.93  | 9.89  |
| 1625295 at   | FBgn0015402 | 7.94  | 7.96  | 7.74  | 8.1   | 8.11  | 8.08  |
| 1632421 at   | FBgn0031817 | 8.43  | 8.45  | 8.26  | 8.16  | 8.58  | 8.36  |
| 1640977 at   | FBgn0032393 | 9.44  | 9.46  | 9.52  | 9.7   | 9.53  | 9.44  |
| 1629286 s at | FBgn0040918 | 9.68  | 9.7   | 9.58  | 9.6   | 9.63  | 9.9   |
| 1637993 at   | ---         | 8.43  | 8.46  | 8.38  | 8.56  | 8.62  | 8.51  |
| 1640612 at   | FBgn0035285 | 9.03  | 9.05  | 9.06  | 9.12  | 9.17  | 9.12  |
| 1622981 at   | FBgn0003964 | 8.94  | 8.96  | 8.86  | 9.07  | 9.08  | 9.1   |
| 1631519 at   | FBgn0034496 | 7.82  | 7.84  | 8.01  | 8.06  | 7.85  | 7.81  |
| 1624705 a at | FBgn0014163 | 10.81 | 10.83 | 10.82 | 10.78 | 10.74 | 10.91 |
| 1641278 at   | FBgn0032236 | 10.34 | 10.36 | 10.57 | 10.5  | 10.57 | 10.63 |
| 1633222 at   | FBgn0039417 | 8.85  | 8.87  | 8.66  | 8.68  | 9.02  | 8.93  |
| 1626785 at   | FBgn0015268 | 12.95 | 12.97 | 12.98 | 13.09 | 13.12 | 13.05 |
| 1626163 s at | FBgn0000042 | 13.13 | 13.15 | 13.05 | 13.18 | 13.09 | 13.01 |
| 1632771 at   | FBgn0034727 | 9.59  | 9.61  | 9.76  | 9.81  | 9.78  | 9.65  |
| 1630492 at   | FBgn0036513 | 9.72  | 9.74  | 9.57  | 9.89  | 9.69  | 9.53  |
| 1626199 at   | FBgn0035238 | 8.85  | 8.87  | 8.94  | 8.87  | 8.97  | 9.15  |
| 1639023 at   | FBgn0013998 | 7.93  | 7.95  | 8.23  | 8.51  | 8.13  | 7.76  |

|              |             |       |       |       |       |       |       |
|--------------|-------------|-------|-------|-------|-------|-------|-------|
| 1626988 at   | FBgn0034179 | 7.06  | 7.08  | 7.39  | 7.78  | 7.58  | 7.8   |
| 1637106 at   | FBgn0035866 | 9.89  | 9.91  | 9.74  | 9.89  | 9.94  | 9.96  |
| 1640089 at   | FBgn0023143 | 11.27 | 11.29 | 11.37 | 11.45 | 11.32 | 11.39 |
| 1623715 at   | FBgn0031898 | 8.72  | 8.74  | 9.02  | 9.27  | 9.02  | 8.81  |
| 1626143 a at | ---         | 7.27  | 7.29  | 7.04  | 6.99  | 7.4   | 7.27  |
| 1637678 at   | FBgn0022344 | 10.19 | 10.21 | 10.46 | 10.26 | 10.15 | 10.22 |
| 1633625 s at | FBgn0016696 | 9.91  | 9.93  | 9.63  | 9.73  | 9.83  | 9.83  |
| 1637988 at   | FBgn0034248 | 9.56  | 9.58  | 9.8   | 9.73  | 9.55  | 9.42  |
| 1640042 at   | FBgn0032295 | 10.18 | 10.2  | 10.09 | 10.27 | 10.28 | 10.2  |
| 1636286 at   | FBgn0031708 | 9.52  | 9.54  | 9.34  | 9.45  | 9.31  | 9.33  |
| 1638001 a at | FBgn0033675 | 8.47  | 8.49  | 8.55  | 8.79  | 8.65  | 8.67  |
| 1628497 at   | FBgn0031344 | 8.17  | 8.19  | 8.08  | 8.33  | 8.49  | 8.24  |
| 1640928 at   | FBgn0038587 | 12.21 | 12.23 | 12.49 | 12.48 | 12.44 | 12.38 |
| 1623370 at   | FBgn0001990 | 8.42  | 8.44  | 8.33  | 8.66  | 8.61  | 8.56  |
| 1636935 at   | ---         | 10.72 | 10.74 | 10.66 | 10.79 | 10.79 | 10.9  |
| 1627868 at   | FBgn0004901 | 10.36 | 10.38 | 10.43 | 10.49 | 10.45 | 10.44 |
| 1634822 a at | FBgn0034729 | 8.09  | 8.1   | 8.16  | 8.44  | 8.59  | 8.5   |
| 1633680 at   | FBgn0037809 | 7.54  | 7.56  | 7.64  | 7.86  | 7.82  | 7.9   |
| 1634670 at   | FBgn0052714 | 10.53 | 10.55 | 10.47 | 10.47 | 10.28 | 10.8  |
| 1632765 at   | FBgn0038303 | 8.15  | 8.17  | 8.24  | 8.27  | 8.3   | 8.12  |
| 1641075 at   | FBgn0039302 | 10.52 | 10.53 | 10.63 | 10.41 | 10.42 | 10.41 |
| 1638970 at   | FBgn0039404 | 9.13  | 9.15  | 9.08  | 9.16  | 9.11  | 9.22  |
| 1628061 at   | FBgn0030616 | 13.27 | 13.29 | 13.45 | 13.45 | 13.41 | 13.35 |
| 1634979 at   | FBgn0038601 | 10.14 | 10.16 | 10.29 | 10.21 | 9.93  | 10.02 |
| 1638370 s at | FBgn0031071 | 10.51 | 10.53 | 10.18 | 10.11 | 10.39 | 10.56 |
| 1638090 at   | FBgn0032162 | 8.89  | 8.9   | 8.71  | 9.03  | 8.92  | 8.78  |
| 1626076 at   | FBgn0037700 | 9.86  | 9.88  | 9.95  | 10.17 | 9.96  | 9.97  |
| 1641436 at   | FBgn0033740 | 8.99  | 9.01  | 8.84  | 8.85  | 9.02  | 8.92  |
| 1640476 at   | FBgn0032169 | 8.75  | 8.76  | 8.61  | 8.83  | 8.74  | 8.7   |
| 1627364 s at | FBgn0014027 | 13.84 | 13.86 | 13.87 | 13.93 | 13.91 | 13.79 |
| 1623405 at   | FBgn0011692 | 10.19 | 10.21 | 10.1  | 10.35 | 10.22 | 10.17 |
| 1630247 at   | FBgn0034734 | 7.52  | 7.53  | 7.65  | 7.38  | 7.53  | 7.44  |
| 1628960 s at | FBgn0025635 | 9.81  | 9.83  | 9.68  | 9.94  | 9.9   | 9.83  |
| 1624064 at   | FBgn0030738 | 10.11 | 10.13 | 10.05 | 10.31 | 10.16 | 10.15 |
| 1628991 at   | FBgn0019830 | 9.66  | 9.68  | 9.83  | 9.85  | 9.64  | 9.6   |
| 1626513 at   | FBgn0036846 | 9.01  | 9.03  | 8.96  | 9.14  | 9.13  | 9.05  |

|              |                         |       |       |       |       |       |       |
|--------------|-------------------------|-------|-------|-------|-------|-------|-------|
| 1623408 s at | FBgn0029676             | 11.2  | 11.22 | 11.32 | 11.42 | 11.35 | 11.26 |
| 1636861 at   | FBgn0033925             | 8.93  | 8.95  | 8.76  | 8.92  | 9.01  | 8.98  |
| 1635365 at   | FBgn0032250             | 9.19  | 9.21  | 9.16  | 9.29  | 9.3   | 9.39  |
| 1638161 at   | FBgn0037202             | 9.26  | 9.28  | 9.27  | 9.35  | 9.16  | 9.03  |
| 1633418 at   | FBgn0036741 /// FBgn003 | 9.76  | 9.78  | 9.47  | 9.48  | 9.72  | 9.79  |
| 1639011 a at | FBgn0037329             | 8.77  | 8.79  | 8.76  | 8.75  | 8.94  | 8.83  |
| 1628279 s at | FBgn0039929             | 11.11 | 11.13 | 11.3  | 11.43 | 11.09 | 11.29 |
| 1632195 at   | FBgn0030435             | 9.46  | 9.47  | 9.22  | 9.2   | 9.53  | 9.53  |
| 1639731 at   | FBgn0038564             | 9.56  | 9.58  | 9.3   | 9.5   | 9.52  | 9.61  |
| 1638342 at   | FBgn0037378             | 10.09 | 10.11 | 10.19 | 10.23 | 10.03 | 9.94  |
| 1634881 at   | FBgn0033029             | 9.17  | 9.19  | 9.21  | 9.32  | 9.05  | 9.24  |
| 1637369 at   | ---                     | 9.19  | 9.21  | 9.31  | 9.44  | 9.33  | 9.3   |
| 1638822 at   | FBgn0036484             | 9.42  | 9.44  | 9.42  | 9.52  | 9.67  | 9.55  |
| 1632931 at   | ---                     | 10.28 | 10.3  | 10.12 | 10.32 | 10.24 | 10.46 |
| 1630794 at   | FBgn0037371             | 8.84  | 8.85  | 8.71  | 9.01  | 9.04  | 8.91  |
| 1640689 a at | ---                     | 10.92 | 10.94 | 11.02 | 11.2  | 10.99 | 10.93 |
| 1630953 at   | FBgn0035692             | 10.78 | 10.79 | 10.92 | 10.75 | 10.77 | 10.87 |
| 1641300 s at | ---                     | 12.52 | 12.54 | 12.24 | 12.43 | 12.55 | 12.6  |
| 1628425 at   | ---                     | 7.81  | 7.82  | 7.46  | 8.66  | 7.84  | 7.7   |
| 1637808 a at | FBgn0036533             | 8.92  | 8.94  | 8.78  | 8.65  | 8.81  | 8.91  |
| 1628938 at   | ---                     | 8.55  | 8.56  | 8.54  | 8.49  | 8.29  | 8.36  |
| 1629116 at   | ---                     | 11.77 | 11.79 | 11.76 | 11.8  | 11.85 | 11.87 |
| 1625827 s at | FBgn0051992             | 11.22 | 11.24 | 11.09 | 11.18 | 11.18 | 11.26 |
| 1629466 at   | FBgn0039069             | 8.53  | 8.55  | 8.69  | 9.06  | 8.72  | 8.54  |
| 1631517 at   | FBgn0020633             | 10.85 | 10.87 | 11.25 | 11.45 | 11.08 | 10.85 |
| 1638476 s at | FBgn0002777             | 8.65  | 8.66  | 8.15  | 8.11  | 8.68  | 8.73  |
| 1634393 s at | FBgn0030268             | 10.16 | 10.18 | 10.08 | 10.33 | 10.34 | 10.25 |
| 1641462 at   | FBgn0035323             | 8.49  | 8.51  | 8.68  | 8.53  | 8.53  | 8.41  |
| 1639645 at   | FBgn0037669             | 9.78  | 9.8   | 9.88  | 10.16 | 10.07 | 9.89  |
| 1632274 at   | FBgn0030671             | 9.39  | 9.4   | 9.32  | 9.44  | 9.35  | 9.4   |
| 1640099 at   | FBgn0040066             | 8.11  | 8.12  | 8.42  | 8.62  | 8.07  | 8.27  |
| 1637298 at   | FBgn0036760             | 9.75  | 9.77  | 9.55  | 9.79  | 9.79  | 9.73  |
| 1626353 at   | FBgn0030352             | 9.28  | 9.3   | 9.1   | 9.19  | 9.09  | 9.12  |
| 1623580 at   | FBgn0003884             | 13    | 13.02 | 13.08 | 13.2  | 12.96 | 13.08 |
| 1640989 at   | FBgn0037779             | 9.6   | 9.62  | 9.6   | 9.53  | 9.63  | 9.54  |
| 1640346 at   | ---                     | 9.94  | 9.96  | 9.8   | 10.2  | 10.23 | 10    |

|              |                         |       |       |       |       |       |       |
|--------------|-------------------------|-------|-------|-------|-------|-------|-------|
| 1633528 s at | ---                     | 10.82 | 10.84 | 10.83 | 10.92 | 10.86 | 10.86 |
| 1635774 at   | FBgn0033233             | 9.31  | 9.33  | 9.27  | 9.32  | 9.32  | 9.25  |
| 1632908 s at | FBgn0051072             | 8.41  | 8.43  | 8.44  | 7.92  | 8.33  | 8.3   |
| 1636708 at   | FBgn0038195             | 9.95  | 9.97  | 9.8   | 9.78  | 10.07 | 10.04 |
| 1631106 s at | FBgn0027086             | 10.04 | 10.05 | 10.56 | 10.46 | 10.23 | 10.06 |
| 1626449 s at | FBgn0037346             | 12.54 | 12.55 | 12.45 | 12.5  | 12.53 | 12.53 |
| 1631594 s at | FBgn0015279             | 9.26  | 9.28  | 9.4   | 9.39  | 9.29  | 9.2   |
| 1628846 at   | FBgn0038549 /// FBgn003 | 8.12  | 8.14  | 7.96  | 8.04  | 8.04  | 7.92  |
| 1627301 s at | FBgn0038575             | 10.42 | 10.43 | 10.16 | 10.6  | 10.56 | 10.5  |
| 1624464 s at | FBgn0037925             | 9.25  | 9.27  | 9.34  | 9.09  | 8.72  | 8.9   |
| 1632551 at   | FBgn0036982             | 8.31  | 8.32  | 7.95  | 8.2   | 8.14  | 8.15  |
| 1623692 s at | FBgn0030318             | 8.9   | 8.91  | 8.86  | 8.94  | 8.6   | 8.56  |
| 1631493 at   | FBgn0029093             | 11.66 | 11.68 | 11.54 | 11.45 | 11.61 | 11.57 |
| 1635247 at   | FBgn0038675             | 9.01  | 9.02  | 8.84  | 9.22  | 9.26  | 9.19  |
| 1630738 s at | FBgn0026379             | 7.54  | 7.55  | 7.45  | 7.59  | 7.1   | 7.07  |
| 1633878 at   | FBgn0034240             | 7.88  | 7.89  | 7.58  | 7.47  | 7.83  | 7.71  |
| 1628615 at   | FBgn0039116             | 8.79  | 8.81  | 9.04  | 9.15  | 8.95  | 8.92  |
| 1631313 at   | FBgn0014930             | 9.34  | 9.35  | 9.51  | 9.39  | 9.45  | 9.45  |
| 1637515 s at | FBgn0032956             | 9.16  | 9.17  | 9.14  | 9.48  | 9.35  | 9.35  |
| 1630079 at   | FBgn0019637             | 8.74  | 8.76  | 8.81  | 8.9   | 8.83  | 8.6   |
| 1637214 a at | FBgn0004243             | 9.69  | 9.7   | 9.69  | 9.45  | 9.76  | 9.67  |
| 1631088 at   | FBgn0031094             | 9.51  | 9.52  | 9.49  | 9.58  | 9.6   | 9.45  |
| 1626049 at   | FBgn0032052             | 9.5   | 9.51  | 9.26  | 9.52  | 9.52  | 9.43  |
| 1641733 a at | FBgn0030657             | 7.47  | 7.49  | 7.4   | 7.88  | 7.43  | 7.36  |
| 1639224 at   | FBgn0032906             | 10.66 | 10.68 | 10.56 | 11.14 | 10.95 | 10.74 |
| 1624763 at   | FBgn0030396             | 9.17  | 9.18  | 9.18  | 9.2   | 9.24  | 9.22  |
| 1634609 at   | FBgn0051111             | 8.8   | 8.81  | 8.72  | 9.21  | 9.09  | 8.93  |
| 1638411 at   | FBgn0036800             | 9.02  | 9.04  | 8.96  | 9.47  | 9.2   | 9.18  |
| 1630178 at   | FBgn0035402             | 9.33  | 9.34  | 9.34  | 9.56  | 9.33  | 9.1   |
| 1637517 s at | FBgn0020647             | 8.45  | 8.46  | 8.43  | 8.65  | 8.49  | 8.33  |
| 1635645 at   | FBgn0032881             | 7.92  | 7.93  | 8.07  | 8.22  | 8.01  | 7.88  |
| 1628487 s at | FBgn0035107             | 10.16 | 10.17 | 9.93  | 10.11 | 10.19 | 10.1  |
| 1627109 at   | FBgn0001220             | 11.22 | 11.23 | 11.47 | 11.22 | 11.24 | 11.34 |
| 1638431 at   | ---                     | 7.96  | 7.98  | 7.86  | 7.93  | 7.58  | 7.5   |
| 1640497 at   | FBgn0032742             | 10.25 | 10.26 | 10.25 | 10.43 | 10.54 | 10.34 |
| 1629082 at   | ---                     | 10.68 | 10.69 | 10.72 | 10.88 | 10.76 | 10.69 |

|              |             |       |       |       |       |       |       |
|--------------|-------------|-------|-------|-------|-------|-------|-------|
| 1633763 at   | FBgn0031458 | 9.48  | 9.49  | 9.34  | 9.48  | 9.63  | 9.58  |
| 1634924 at   | ---         | 9.88  | 9.89  | 9.91  | 9.88  | 9.9   | 10    |
| 1637053 at   | FBgn0022213 | 11.04 | 11.05 | 11.06 | 11.36 | 11.19 | 11.03 |
| 1635659 at   | FBgn0000377 | 8.83  | 8.85  | 9.16  | 9.2   | 8.99  | 8.8   |
| 1634212 at   | FBgn0035136 | 8.4   | 8.41  | 8.23  | 8.39  | 8.42  | 8.32  |
| 1625197 at   | FBgn0037346 | 10.4  | 10.42 | 10.36 | 10.27 | 10.05 | 10.24 |
| 1639905 at   | FBgn0002021 | 8.95  | 8.96  | 9.06  | 9.39  | 8.9   | 8.87  |
| 1635491 s at | FBgn0040340 | 10.18 | 10.2  | 10.47 | 9.92  | 9.81  | 10.26 |
| 1627926 at   | FBgn0034058 | 9.9   | 9.92  | 9.66  | 10.14 | 9.96  | 9.89  |
| 1636033 at   | FBgn0051368 | 7.49  | 7.51  | 7.94  | 7.8   | 7.82  | 7.59  |
| 1629696 a at | FBgn0050497 | 9.49  | 9.51  | 9.74  | 9.52  | 9.01  | 9.31  |
| 1641346 at   | FBgn0030112 | 9.11  | 9.13  | 8.77  | 8.83  | 9.37  | 9.31  |
| 1627528 at   | FBgn0033900 | 7.33  | 7.35  | 7.79  | 7.68  | 7.34  | 7.33  |
| 1629040 at   | FBgn0031881 | 8.16  | 8.18  | 8.4   | 8.34  | 8.33  | 8.25  |
| AFFX-r2-Dro  | FBgn0000042 | 13.18 | 13.19 | 13.1  | 13.28 | 13.11 | 13.04 |
| 1638520 at   | FBgn0036059 | 9.24  | 9.25  | 9.2   | 9.24  | 9.4   | 9.54  |
| 1624086 at   | FBgn0022097 | 11.99 | 12    | 11.82 | 12.02 | 12.02 | 11.72 |
| 1623326 a at | FBgn0035473 | 11.31 | 11.33 | 11.43 | 11.38 | 11.38 | 11.35 |
| 1639816 at   | FBgn0016132 | 9.54  | 9.55  | 9.32  | 9.43  | 9.54  | 9.54  |
| 1625324 at   | FBgn0038053 | 9.22  | 9.24  | 9.11  | 9.22  | 9.21  | 9.2   |
| 1631029 at   | FBgn0031880 | 7.35  | 7.36  | 7.24  | 7.49  | 7.26  | 7.24  |
| 1635421 at   | FBgn0031106 | 9.85  | 9.87  | 9.51  | 9.66  | 9.62  | 9.68  |
| 1640509 s at | FBgn0016031 | 9.61  | 9.62  | 9.65  | 9.28  | 9.66  | 9.66  |
| 1635079 at   | FBgn0033225 | 8.18  | 8.19  | 8.78  | 8.68  | 8.56  | 8.33  |
| 1639806 at   | ---         | 9.91  | 9.92  | 9.9   | 9.94  | 9.86  | 9.97  |
| 1627244 at   | FBgn0042180 | 10.44 | 10.46 | 10.04 | 10.22 | 10.4  | 10.42 |
| 1633297 at   | ---         | 8.9   | 8.91  | 8.52  | 9.12  | 9.03  | 8.97  |
| 1627911 at   | FBgn0038673 | 9.13  | 9.14  | 9.35  | 9.51  | 9.23  | 9.24  |
| 1631191 at   | FBgn0039554 | 8.7   | 8.72  | 8.68  | 8.91  | 8.7   | 8.69  |
| 1623339 at   | FBgn0040833 | 8.96  | 8.97  | 9.1   | 9.38  | 9     | 8.97  |
| 1630671 s at | FBgn0024246 | 8.14  | 8.16  | 8.12  | 8.2   | 8.04  | 8.05  |
| 1631019 at   | FBgn0035918 | 10.05 | 10.07 | 9.91  | 10.3  | 10.12 | 10.07 |
| 1628297 a at | FBgn0037746 | 9.12  | 9.13  | 8.88  | 9.28  | 9.2   | 9.11  |
| 1626673 s at | ---         | 10.57 | 10.58 | 10.68 | 10.7  | 10.68 | 10.68 |
| 1636626 s at | FBgn0053071 | 10.96 | 10.97 | 11.02 | 10.77 | 10.82 | 10.88 |
| 1636482 at   | FBgn0031739 | 9.59  | 9.61  | 9.48  | 9.62  | 9.58  | 9.69  |



|              |                         |       |       |       |       |       |       |
|--------------|-------------------------|-------|-------|-------|-------|-------|-------|
| 1625163 at   | FBgn0029117             | 8.94  | 8.96  | 8.99  | 9.04  | 9.01  | 8.99  |
| 1627314 s at | FBgn0051864 /// FBgn003 | 9.5   | 9.51  | 9.22  | 9.38  | 9.46  | 9.38  |
| 1635692 s at | FBgn0003748             | 9.59  | 9.6   | 9.97  | 9.42  | 9.27  | 9.28  |
| 1627018 s at | FBgn0020235             | 11.38 | 11.39 | 11.66 | 11.58 | 11.61 | 11.52 |
| 1637618 at   | FBgn0024230             | 8.79  | 8.8   | 8.58  | 8.84  | 8.84  | 8.86  |
| 1623853 at   | FBgn0015000             | 9.1   | 9.11  | 8.94  | 9.15  | 9.3   | 9.25  |
| 1629279 at   | FBgn0030858             | 8.53  | 8.54  | 8.57  | 8.86  | 8.68  | 8.5   |
| 1636126 at   | FBgn0026573             | 8.53  | 8.54  | 8.14  | 8.29  | 8.41  | 8.76  |
| 1626056 a at | FBgn0035766             | 9.47  | 9.48  | 9.68  | 9.73  | 9.56  | 9.52  |
| 1636948 a at | ---                     | 9.96  | 9.97  | 10.3  | 10.23 | 10.07 | 9.92  |
| 1623365 at   | FBgn0013753             | 9.41  | 9.42  | 9.13  | 9.6   | 9.45  | 9.52  |
| 1624078 at   | FBgn0039153             | 7.76  | 7.77  | 7.67  | 8.02  | 8.04  | 7.89  |
| 1631719 at   | ---                     | 8.99  | 9     | 8.81  | 9.27  | 9.1   | 8.98  |
| 1640577 a at | FBgn0034261             | 8.46  | 8.48  | 8.31  | 8.51  | 8.57  | 8.41  |
| 1624831 at   | ---                     | 8.76  | 8.77  | 8.73  | 9.14  | 8.96  | 8.88  |
| 1628831 at   | FBgn0025615             | 9.82  | 9.83  | 9.8   | 10.02 | 9.95  | 9.87  |
| 1634972 at   | FBgn0034215             | 10.26 | 10.27 | 10.33 | 10.38 | 10.21 | 10.24 |
| 1630227 a at | FBgn0037703 /// FBgn003 | 9.81  | 9.82  | 9.54  | 9.76  | 9.63  | 9.73  |
| 1623291 at   | ---                     | 9.58  | 9.59  | 9.8   | 9.49  | 10    | 9.76  |
| 1632309 at   | FBgn0036148             | 9.22  | 9.23  | 9.32  | 9.33  | 9.39  | 9.21  |
| 1639917 at   | ---                     | 8.37  | 8.38  | 8.15  | 8.23  | 8.3   | 8.44  |
| 1627114 at   | FBgn0028507             | 9.58  | 9.59  | 9.6   | 9.81  | 9.76  | 9.68  |
| 1634065 s at | FBgn0000579             | 12.86 | 12.87 | 12.72 | 13.18 | 12.89 | 12.81 |
| 1625141 at   | ---                     | 10.13 | 10.14 | 10.3  | 10.21 | 10.29 | 10.19 |
| 1641427 at   | FBgn0024236             | 9.96  | 9.97  | 9.9   | 9.93  | 10.1  | 10.18 |
| 1640633 s at | FBgn0052425             | 10.27 | 10.28 | 10.16 | 10.43 | 10.35 | 10.29 |
| 1631131 a at | FBgn0030170             | 8.47  | 8.49  | 8.1   | 8.54  | 8.62  | 8.35  |
| 1639770 at   | ---                     | 8.68  | 8.69  | 8.68  | 8.71  | 8.89  | 8.92  |
| 1627111 at   | FBgn0029148             | 11.07 | 11.08 | 11.46 | 11.16 | 11.02 | 11.05 |
| 1628509 at   | FBgn0028541             | 9.89  | 9.9   | 10.08 | 10.17 | 10.06 | 10.02 |
| 1628521 at   | FBgn0031661             | 9.13  | 9.14  | 8.99  | 9.05  | 9.07  | 9.17  |
| 1624649 a at | FBgn0036697             | 9.47  | 9.48  | 9.34  | 9.27  | 9.45  | 9.64  |
| 1628311 at   | FBgn0034065             | 8.39  | 8.4   | 8.66  | 8.39  | 8.4   | 8.4   |
| 1625470 s at | FBgn0024273             | 7.25  | 7.26  | 7.12  | 7.48  | 7.51  | 7.48  |
| 1622979 a at | FBgn0035871             | 10.73 | 10.74 | 10.5  | 10.75 | 10.61 | 10.62 |
| 1635250 at   | FBgn0042107             | 8.17  | 8.18  | 7.92  | 8.23  | 8.33  | 8.26  |

|              |             |       |       |       |       |       |       |
|--------------|-------------|-------|-------|-------|-------|-------|-------|
| 1639568 at   | FBgn0051285 | 7.18  | 7.19  | 7.29  | 7.46  | 6.97  | 6.94  |
| 1634023 at   | FBgn0039407 | 8     | 8.01  | 8.04  | 7.98  | 8.08  | 8.02  |
| 1625110 at   | FBgn0034577 | 10.68 | 10.69 | 10.73 | 10.57 | 10.58 | 10.63 |
| 1632904 at   | FBgn0031868 | 8.13  | 8.14  | 7.78  | 8     | 8.43  | 8.62  |
| 1638047 at   | FBgn0031499 | 8.4   | 8.41  | 8.09  | 8.49  | 8.58  | 8.6   |
| 1640185 at   | FBgn0030263 | 9.2   | 9.21  | 9.17  | 9.51  | 9.5   | 9.29  |
| 1630792 at   | FBgn0040075 | 10.1  | 10.11 | 10.41 | 10.16 | 10.12 | 10.08 |
| 1638500 at   | FBgn0034537 | 9.3   | 9.31  | 9.19  | 9.26  | 9.38  | 9.43  |
| 1627104 at   | FBgn0038597 | 7.87  | 7.88  | 8.54  | 8.1   | 7.94  | 7.68  |
| 1630453 at   | FBgn0052267 | 10.99 | 11    | 10.87 | 11.01 | 11.04 | 11.15 |
| 1630208 at   | FBgn0041588 | 8.69  | 8.7   | 8.67  | 8.64  | 8.74  | 8.69  |
| 1636842 at   | FBgn0031996 | 9.29  | 9.3   | 9.32  | 9.54  | 9.46  | 9.33  |
| 1628950 at   | FBgn0032684 | 7.29  | 7.3   | 7.36  | 7.43  | 6.94  | 7.33  |
| 1635824 at   | FBgn0026080 | 8.97  | 8.98  | 8.82  | 8.88  | 8.92  | 8.91  |
| 1623819 at   | FBgn0003346 | 10.26 | 10.27 | 10.33 | 10.4  | 10.54 | 10.45 |
| 1625573 at   | FBgn0030480 | 10.26 | 10.27 | 10.41 | 10.37 | 10.19 | 10.23 |
| 1630023 at   | ---         | 9.71  | 9.72  | 9.51  | 9.35  | 9.6   | 9.66  |
| 1636765 at   | FBgn0002781 | 7.17  | 7.18  | 7.12  | 7.59  | 7.6   | 7.48  |
| 1625746 at   | FBgn0035152 | 7.83  | 7.84  | 7.94  | 7.9   | 8     | 8.15  |
| 1625845 s at | FBgn0000412 | 11.83 | 11.84 | 11.83 | 11.81 | 11.79 | 11.83 |
| 1630078 a at | FBgn0052000 | 9.92  | 9.93  | 9.97  | 9.85  | 9.63  | 9.92  |
| 1624529 at   | FBgn0005533 | 13.66 | 13.67 | 13.77 | 13.8  | 13.81 | 13.75 |
| 1623302 at   | FBgn0033891 | 7.82  | 7.83  | 7.85  | 7.98  | 8.01  | 7.9   |
| 1628014 at   | FBgn0030853 | 9.68  | 9.69  | 10.18 | 9.85  | 9.84  | 9.73  |
| 1628264 a at | FBgn0027375 | 8.01  | 8.02  | 8.18  | 8.25  | 8.26  | 8.06  |
| 1625633 a at | FBgn0000116 | 10.41 | 10.42 | 10.7  | 10.96 | 10.39 | 10.42 |
| 1632397 at   | FBgn0034498 | 9.04  | 9.05  | 9     | 8.97  | 9.04  | 9     |
| 1627280 s at | FBgn0013726 | 11.11 | 11.12 | 11.15 | 11.31 | 11.02 | 11.07 |
| 1641291 at   | FBgn0036762 | 10.04 | 10.05 | 10.38 | 10.5  | 10.31 | 10.14 |
| 1641329 at   | FBgn0030967 | 8     | 8.01  | 7.9   | 7.87  | 8     | 8.01  |
| 1639135 at   | FBgn0010391 | 10.23 | 10.24 | 10.41 | 10.15 | 10.09 | 10.07 |
| 1627977 at   | FBgn0033454 | 8.9   | 8.91  | 9.2   | 9.27  | 8.98  | 8.87  |
| 1629819 s at | FBgn0011260 | 10.81 | 10.82 | 11.08 | 11.01 | 10.95 | 10.92 |
| 1640610 at   | FBgn0034694 | 7.69  | 7.7   | 7.73  | 8     | 7.83  | 7.72  |
| 1628422 s at | ---         | 10    | 10.01 | 9.87  | 9.9   | 9.88  | 9.98  |
| 1637679 s at | FBgn0015320 | 11.11 | 11.12 | 11.13 | 11.35 | 11.2  | 11.27 |

|              |             |       |       |       |       |       |       |
|--------------|-------------|-------|-------|-------|-------|-------|-------|
| 1641193 s at | FBgn0046214 | 13.13 | 13.14 | 13.18 | 13.21 | 13.15 | 13.13 |
| 1633380 at   | FBgn0033473 | 8.97  | 8.98  | 9.33  | 9.38  | 9.13  | 9.06  |
| 1641373 at   | FBgn0038585 | 10.26 | 10.27 | 10.4  | 10.37 | 10.12 | 10.21 |
| 1632822 at   | ---         | 8.68  | 8.69  | 8.66  | 8.64  | 8.73  | 8.69  |
| 1638875 at   | ---         | 9.65  | 9.65  | 9.69  | 9.69  | 9.57  | 9.69  |
| 1639355 s at | ---         | 9.33  | 9.34  | 9.88  | 9.23  | 9.18  | 9.59  |
| 1638570 a at | FBgn0036213 | 13.96 | 13.97 | 13.9  | 13.89 | 13.92 | 13.87 |
| 1638351 s at | FBgn0000556 | 14.4  | 14.41 | 14.44 | 14.52 | 14.45 | 14.42 |
| 1635603 at   | FBgn0038043 | 10.53 | 10.54 | 10.64 | 10.78 | 10.66 | 10.64 |
| 1637967 at   | ---         | 10.85 | 10.86 | 10.86 | 10.85 | 11.02 | 10.98 |
| 1635314 at   | FBgn0034534 | 9.42  | 9.43  | 9.57  | 9.6   | 9.62  | 9.56  |
| 1623632 s at | FBgn0036115 | 10.59 | 10.6  | 10.73 | 10.48 | 9.87  | 10.38 |
| 1622948 at   | ---         | 9.18  | 9.19  | 9     | 9.29  | 9.33  | 9.26  |
| 1631832 at   | FBgn0004687 | 11.58 | 11.59 | 11.81 | 11.56 | 11.54 | 11.67 |
| 1640090 a at | FBgn0003423 | 10.23 | 10.24 | 10.39 | 10.04 | 10.08 | 10.26 |
| 1633856 at   | ---         | 9.74  | 9.75  | 10.11 | 10.02 | 9.79  | 9.7   |
| 1636496 at   | ---         | 10.04 | 10.05 | 10.03 | 9.99  | 9.9   | 10    |
| 1623670 at   | FBgn0037142 | 7.13  | 7.14  | 7.26  | 7.55  | 7.22  | 7.13  |
| 1634176 a at | ---         | 9.23  | 9.24  | 9.19  | 9.29  | 9.46  | 9.37  |
| 1626657 a at | FBgn0039003 | 7.76  | 7.77  | 7.74  | 7.94  | 7.79  | 7.54  |
| 1623257 a at | FBgn0039997 | 9.83  | 9.83  | 9.94  | 9.93  | 9.98  | 9.92  |
| 1639443 at   | FBgn0040600 | 7.25  | 7.26  | 7.8   | 7.31  | 7.26  | 7.24  |
| 1635399 s at | ---         | 8.02  | 8.03  | 7.9   | 8.04  | 7.97  | 8.07  |
| 1634652 a at | FBgn0036516 | 8.44  | 8.45  | 8.42  | 8.47  | 8.58  | 8.64  |
| 1640558 a at | FBgn0037556 | 9.73  | 9.74  | 9.35  | 9.61  | 9.73  | 9.82  |
| 1626371 at   | FBgn0037756 | 11.44 | 11.45 | 11.58 | 11.58 | 11.51 | 11.59 |
| 1635756 at   | ---         | 9.12  | 9.13  | 9.24  | 9.27  | 9.27  | 9.39  |
| 1638201 at   | FBgn0028967 | 12.26 | 12.27 | 12.16 | 12.5  | 12.5  | 12.39 |
| 1628027 a at | FBgn0003178 | 11.95 | 11.96 | 11.93 | 12.23 | 12.14 | 11.86 |
| 1627502 at   | FBgn0034674 | 8.81  | 8.82  | 8.93  | 9.13  | 9.04  | 8.98  |
| 1629607 at   | FBgn0030915 | 8.84  | 8.85  | 8.65  | 8.75  | 9.08  | 9.05  |
| 1630798 at   | FBgn0050077 | 7.32  | 7.33  | 7.54  | 7.53  | 7.32  | 7.26  |
| 1623936 at   | ---         | 11.26 | 11.26 | 11.24 | 11.33 | 11.16 | 11.18 |
| 1639771 at   | FBgn0040236 | 9.12  | 9.13  | 9.05  | 9.06  | 9.15  | 9.07  |
| 1630743 at   | FBgn0022347 | 10.49 | 10.5  | 10.38 | 10.72 | 10.55 | 10.55 |
| 1635621 at   | ---         | 9.35  | 9.36  | 9.4   | 9.58  | 9.52  | 9.46  |

|              |             |       |       |       |       |       |       |
|--------------|-------------|-------|-------|-------|-------|-------|-------|
| 1623222 s at | FBgn0004828 | 12.23 | 12.24 | 11.95 | 11.98 | 12.31 | 12.23 |
| 1636997 at   | FBgn0039189 | 8.67  | 8.68  | 8.63  | 8.77  | 8.65  | 8.62  |
| 1641491 at   | ---         | 12.89 | 12.9  | 13.05 | 13.17 | 13    | 12.88 |
| 1626998 at   | FBgn0037619 | 7.58  | 7.59  | 7.51  | 7.6   | 7.91  | 7.94  |
| 1629452 at   | FBgn0038868 | 8.47  | 8.48  | 8.47  | 8.17  | 8.37  | 8.47  |
| 1623138 at   | FBgn0033676 | 10.46 | 10.46 | 10.25 | 10.34 | 10.4  | 10.56 |
| 1635280 at   | FBgn0039349 | 9.43  | 9.44  | 9.32  | 9.65  | 9.5   | 9.35  |
| 1623857 at   | ---         | 9.11  | 9.12  | 8.91  | 9.3   | 9.43  | 9.3   |
| 1628112 at   | ---         | 8.7   | 8.7   | 8.61  | 8.79  | 8.87  | 8.77  |
| 1635253 a at | FBgn0029721 | 10.7  | 10.71 | 10.95 | 10.93 | 10.85 | 10.79 |
| 1627270 at   | FBgn0029865 | 10.35 | 10.36 | 10.1  | 10.31 | 10.4  | 10.37 |
| 1632047 at   | FBgn0037263 | 6.7   | 6.7   | 6.73  | 7.21  | 7.34  | 7     |
| 1631878 at   | FBgn0060451 | 12.01 | 12.02 | 12.11 | 11.99 | 12.16 | 12.12 |
| 1624815 at   | FBgn0010278 | 9.28  | 9.29  | 9.45  | 9.49  | 9.54  | 9.49  |
| 1637736 a at | FBgn0030930 | 8.81  | 8.82  | 8.67  | 8.76  | 8.77  | 8.64  |
| 1634172 at   | FBgn0004915 | 10.6  | 10.61 | 10.49 | 10.73 | 10.66 | 10.71 |
| 1628160 a at | FBgn0020306 | 9.04  | 9.05  | 8.76  | 8.96  | 8.68  | 8.95  |
| 1632440 at   | ---         | 12.47 | 12.47 | 12.53 | 12.64 | 12.53 | 12.45 |
| 1632513 at   | FBgn0024542 | 9.33  | 9.33  | 9.34  | 9.84  | 9.55  | 9.47  |
| 1629464 a at | FBgn0052473 | 10.28 | 10.29 | 10.35 | 10.45 | 10.25 | 10.35 |
| 1625944 a at | FBgn0036574 | 9.64  | 9.65  | 9.78  | 9.77  | 9.76  | 9.74  |
| 1631248 at   | FBgn0030062 | 8.46  | 8.46  | 8.97  | 8.57  | 8.41  | 8.5   |
| 1627863 at   | FBgn0030752 | 8.9   | 8.91  | 8.67  | 8.67  | 8.98  | 8.92  |
| 1623573 s at | FBgn0031883 | 10.59 | 10.6  | 10.54 | 10.6  | 10.5  | 10.4  |
| 1628324 at   | FBgn0029893 | 9.6   | 9.61  | 9.6   | 9.49  | 9.63  | 9.71  |
| 1630466 at   | FBgn0031864 | 9.26  | 9.27  | 9.57  | 9.4   | 9.37  | 9.2   |
| 1634020 at   | ---         | 9.83  | 9.83  | 9.8   | 9.48  | 9.5   | 9.63  |
| 1636066 s at | ---         | 7.01  | 7.02  | 7.15  | 7.07  | 6.96  | 6.9   |
| 1638439 a at | FBgn0017545 | 14.33 | 14.33 | 14.35 | 14.41 | 14.35 | 14.31 |
| 1630932 at   | FBgn0038106 | 8.63  | 8.64  | 8.79  | 8.92  | 8.79  | 8.72  |
| 1628920 at   | FBgn0031048 | 11.45 | 11.45 | 10.63 | 11    | 11.29 | 11.13 |
| 1637737 at   | FBgn0030184 | 11.68 | 11.68 | 11.96 | 11.81 | 11.85 | 11.78 |
| 1630448 at   | FBgn0027514 | 8.41  | 8.42  | 8.26  | 8.62  | 8.43  | 8.29  |
| 1634489 at   | FBgn0023517 | 10.84 | 10.85 | 10.81 | 11.03 | 11.03 | 10.84 |
| 1627308 s at | FBgn0028697 | 14.08 | 14.08 | 14.16 | 14.18 | 14.17 | 14.14 |
| 1629650 at   | FBgn0031536 | 8.06  | 8.06  | 7.97  | 8.04  | 7.96  | 7.88  |

|              |                         |       |       |       |       |       |       |
|--------------|-------------------------|-------|-------|-------|-------|-------|-------|
| 1623606 at   | FBgn0002593             | 14.1  | 14.1  | 14.15 | 14.11 | 14.13 | 14.15 |
| 1629943 at   | FBgn0035879             | 7.78  | 7.79  | 7.94  | 8.05  | 7.9   | 7.81  |
| 1631861 at   | FBgn0004106             | 11.44 | 11.44 | 11.46 | 11.78 | 11.69 | 11.64 |
| 1630623 a at | FBgn0033382             | 8.92  | 8.92  | 8.09  | 8.78  | 8.77  | 8.8   |
| 1639970 at   | FBgn0050422             | 8.42  | 8.42  | 8.34  | 8.58  | 8.6   | 8.39  |
| 1637068 at   | FBgn0037855             | 8.58  | 8.59  | 8.58  | 8.7   | 8.56  | 8.6   |
| 1623387 at   | ---                     | 9.57  | 9.58  | 9.46  | 9.75  | 9.68  | 9.57  |
| 1629151 at   | FBgn0039837             | 9.74  | 9.74  | 9.49  | 9.93  | 9.75  | 9.6   |
| 1631073 at   | FBgn0030529             | 9.91  | 9.92  | 9.97  | 9.73  | 9.82  | 9.95  |
| 1641306 at   | FBgn0017428 /// FBgn000 | 8.22  | 8.23  | 8.27  | 8.12  | 8.22  | 8.05  |
| 1637379 at   | FBgn0037340             | 8.79  | 8.79  | 8.95  | 8.98  | 8.83  | 8.8   |
| 1623543 at   | FBgn0027539             | 9.86  | 9.87  | 9.85  | 9.91  | 9.9   | 9.93  |
| 1634211 at   | ---                     | 7.83  | 7.84  | 7.58  | 7.51  | 7.71  | 7.95  |
| 1635481 a at | FBgn0030946             | 8.24  | 8.25  | 7.91  | 8.09  | 8.17  | 8     |
| 1635052 a at | FBgn0030474             | 7.88  | 7.89  | 7.98  | 8.01  | 7.78  | 7.74  |
| 1639801 at   | FBgn0039943             | 10.38 | 10.39 | 10.21 | 10.21 | 10.36 | 10.35 |
| 1634601 at   | FBgn0037583             | 10.04 | 10.04 | 9.95  | 10.45 | 10.18 | 9.96  |
| 1641540 a at | ---                     | 9.85  | 9.85  | 9.52  | 9.46  | 9.73  | 9.73  |
| 1641608 at   | FBgn0027568             | 8.88  | 8.88  | 8.92  | 9.19  | 8.8   | 8.68  |
| 1638693 s at | FBgn0033226             | 8.7   | 8.7   | 8.62  | 8.66  | 8.88  | 8.72  |
| 1629902 at   | FBgn0033795             | 7.92  | 7.93  | 8.1   | 8.25  | 8.11  | 7.9   |
| 1638189 s at | FBgn0003310             | 9.3   | 9.31  | 9.32  | 9.15  | 9.18  | 9.34  |
| 1636677 s at | FBgn0039635             | 9.12  | 9.12  | 9.13  | 9.34  | 8.98  | 8.9   |
| 1637503 at   | FBgn0026441             | 7.37  | 7.38  | 7.3   | 7.58  | 7.44  | 7.27  |
| 1631194 at   | FBgn0033990             | 8.47  | 8.47  | 8.45  | 8.67  | 8.62  | 8.57  |
| 1635066 at   | FBgn0028500             | 8.27  | 8.27  | 8.5   | 8.5   | 8.3   | 8.27  |
| 1634013 at   | ---                     | 10.53 | 10.53 | 10.78 | 10.8  | 10.63 | 10.52 |
| 1624193 s at | FBgn0038473             | 9.99  | 10    | 10.31 | 10.18 | 10.14 | 10.08 |
| 1623470 at   | FBgn0029158             | 9.29  | 9.29  | 9.31  | 9.4   | 9.4   | 9.4   |
| 1638998 at   | FBgn0039632             | 8.88  | 8.88  | 8.54  | 8.81  | 8.86  | 8.77  |
| 1624141 at   | FBgn0032194             | 9.09  | 9.1   | 9.5   | 9.35  | 9.35  | 9.36  |
| 1628210 at   | FBgn0005695             | 11.06 | 11.07 | 10.98 | 11.05 | 11.11 | 11.12 |
| 1623020 at   | FBgn0031360             | 9.5   | 9.51  | 8.86  | 9.45  | 9.5   | 9.34  |
| 1626266 at   | FBgn0037481             | 9.15  | 9.16  | 9.19  | 9.49  | 9.26  | 9.24  |
| 1629576 at   | FBgn0010342             | 10.42 | 10.43 | 10.09 | 10.51 | 10.57 | 10.49 |
| 1628131 at   | FBgn0004463             | 8.14  | 8.14  | 8.5   | 8.02  | 8.15  | 8.07  |

|              |             |       |       |       |       |       |       |
|--------------|-------------|-------|-------|-------|-------|-------|-------|
| 1625781 at   | FBgn0030996 | 10.02 | 10.02 | 9.89  | 9.98  | 10.02 | 10.01 |
| 1635252 a at | FBgn0000667 | 10.08 | 10.08 | 9.97  | 9.87  | 10.22 | 10.08 |
| 1635688 at   | FBgn0040850 | 7.23  | 7.24  | 6.8   | 6.55  | 6.6   | 7.21  |
| 1634533 at   | FBgn0026316 | 10.05 | 10.06 | 9.98  | 9.9   | 9.91  | 9.98  |
| 1633032 s at | FBgn0036043 | 10.16 | 10.17 | 10.13 | 10.28 | 9.97  | 10.17 |
| 1629478 at   | ---         | 10.63 | 10.64 | 10.73 | 10.98 | 10.64 | 10.55 |
| 1632794 a at | FBgn0035437 | 9.25  | 9.25  | 9.09  | 9.09  | 9.19  | 9.2   |
| 1641718 at   | FBgn0037347 | 7.77  | 7.77  | 7.75  | 7.79  | 8.01  | 8     |
| 1624937 at   | FBgn0032620 | 9.77  | 9.77  | 9.79  | 9.82  | 9.76  | 9.98  |
| 1637411 s at | FBgn0022361 | 8.61  | 8.61  | 8.58  | 8.75  | 8.53  | 8.43  |
| 1624189 at   | FBgn0029822 | 9.1   | 9.1   | 8.92  | 8.98  | 9.21  | 9.3   |
| 1625034 s at | FBgn0026620 | 10.24 | 10.25 | 10.23 | 10.32 | 10.15 | 10.22 |
| 1625748 s at | FBgn0026192 | 9.18  | 9.18  | 9.1   | 8.96  | 8.9   | 8.97  |
| 1641252 at   | FBgn0030506 | 7.68  | 7.69  | 7.78  | 8.19  | 7.86  | 7.62  |
| 1628840 at   | FBgn0011236 | 9.51  | 9.51  | 9.55  | 9.28  | 9.4   | 9.33  |
| 1628636 a at | FBgn0031078 | 9.55  | 9.55  | 9.71  | 9.74  | 9.74  | 9.48  |
| 1633083 at   | FBgn0038426 | 9.18  | 9.18  | 9.42  | 9.38  | 9.22  | 9.12  |
| 1640528 at   | FBgn0039352 | 8.72  | 8.72  | 8.6   | 8.79  | 8.56  | 8.75  |
| 1632197 at   | FBgn0004925 | 11.01 | 11.01 | 11.35 | 11.12 | 11.16 | 11.04 |
| 1626247 at   | FBgn0031314 | 7.74  | 7.75  | 7.73  | 8.12  | 7.99  | 7.68  |
| 1640491 at   | FBgn0034245 | 12.03 | 12.03 | 12.05 | 12.08 | 12.03 | 11.95 |
| 1640104 at   | FBgn0038277 | 13.92 | 13.92 | 13.88 | 13.92 | 13.92 | 13.87 |
| 1634820 at   | FBgn0003150 | 11.15 | 11.15 | 11.49 | 11.4  | 11.3  | 11.13 |
| 1641355 a at | FBgn0039857 | 13.62 | 13.62 | 13.74 | 13.72 | 13.74 | 13.66 |
| 1628427 a at | FBgn0030391 | 9.08  | 9.08  | 8.94  | 9.16  | 9.12  | 9.15  |
| 1633973 at   | ---         | 10.59 | 10.6  | 11.03 | 10.84 | 10.62 | 10.72 |
| 1626544 at   | ---         | 9.77  | 9.77  | 9.76  | 9.76  | 9.61  | 9.62  |
| 1640230 at   | ---         | 8.57  | 8.57  | 8.84  | 8.8   | 8.64  | 8.74  |
| 1633287 at   | FBgn0027619 | 10.99 | 10.99 | 11.15 | 10.97 | 11.13 | 11.18 |
| 1627832 at   | FBgn0011232 | 8.9   | 8.9   | 8.7   | 9.08  | 8.98  | 8.98  |
| 1624006 at   | FBgn0038760 | 7.05  | 7.05  | 7.13  | 7.34  | 7.29  | 7.12  |
| 1633320 at   | FBgn0010747 | 9.24  | 9.24  | 9.27  | 9.36  | 9.4   | 9.23  |
| 1632332 at   | FBgn0039427 | 9.34  | 9.35  | 9.35  | 9.35  | 9.36  | 9.62  |
| 1632776 at   | FBgn0027053 | 10.03 | 10.03 | 10.2  | 10.29 | 10.27 | 10.05 |
| 1627778 a at | FBgn0038306 | 9.35  | 9.35  | 9.46  | 9.22  | 9.26  | 9.32  |
| 1636176 at   | FBgn0004926 | 11.79 | 11.79 | 12.04 | 11.84 | 11.89 | 11.85 |

|              |             |       |       |       |       |       |       |
|--------------|-------------|-------|-------|-------|-------|-------|-------|
| 1641147 s at | FBgn0030735 | 8.92  | 8.93  | 8.88  | 8.95  | 9.06  | 8.99  |
| 1622895 at   | ---         | 8.97  | 8.98  | 9.26  | 9.1   | 9.09  | 9.17  |
| 1631965 at   | FBgn0035854 | 8.52  | 8.52  | 8.64  | 8.49  | 8.24  | 8.34  |
| 1629790 at   | FBgn0036334 | 12.18 | 12.18 | 12.33 | 12.29 | 12.27 | 12.27 |
| 1635508 at   | ---         | 8.39  | 8.4   | 8.65  | 8.52  | 8.38  | 8.42  |
| AFFX-Dros-A  | FBgn0000043 | 10.89 | 10.89 | 11.05 | 10.81 | 10.76 | 10.69 |
| 1630677 at   | FBgn0034401 | 10.59 | 10.59 | 10.72 | 10.72 | 10.72 | 10.52 |
| 1631750 a at | FBgn0016691 | 12.22 | 12.23 | 12.38 | 12.3  | 12.25 | 12.18 |
| 1637510 s at | FBgn0041630 | 8     | 8     | 8.26  | 8.29  | 8.03  | 7.79  |
| 1627256 s at | FBgn0037222 | 11.63 | 11.63 | 11.96 | 11.72 | 11.74 | 11.7  |
| 1638274 s at | FBgn0035946 | 10.77 | 10.77 | 11.09 | 11.04 | 10.93 | 10.67 |
| 1626203 at   | ---         | 9.99  | 9.99  | 9.84  | 10.01 | 9.77  | 9.88  |
| 1623288 at   | FBgn0002284 | 11.82 | 11.83 | 11.92 | 12.1  | 11.93 | 11.76 |
| 1637365 at   | ---         | 9.08  | 9.08  | 9.06  | 9.09  | 9     | 9.15  |
| 1627924 at   | FBgn0003278 | 8.41  | 8.41  | 8.83  | 8.28  | 8.54  | 8.49  |
| 1623252 a at | FBgn0029869 | 9.14  | 9.14  | 9.68  | 9.55  | 9.33  | 9.48  |
| 1631268 at   | FBgn0015905 | 8.2   | 8.2   | 8.12  | 8.6   | 8.38  | 8.21  |
| 1623816 s at | FBgn0037468 | 12.38 | 12.38 | 12.36 | 12.48 | 12.46 | 12.53 |
| 1624572 a at | FBgn0040020 | 10.91 | 10.91 | 10.81 | 10.99 | 10.96 | 11.11 |
| 1623591 a at | FBgn0040005 | 10.2  | 10.2  | 10.08 | 10.05 | 10.22 | 10.36 |
| 1641049 at   | FBgn0000409 | 11.96 | 11.96 | 12.54 | 12.52 | 12.21 | 12.27 |
| 1632891 s at | FBgn0004838 | 12.05 | 12.05 | 12.23 | 12.35 | 12.15 | 12.1  |
| 1625755 at   | FBgn0035401 | 8     | 8     | 8.14  | 8.35  | 8.01  | 7.96  |
| 1635944 a at | ---         | 10.15 | 10.15 | 10.14 | 10.03 | 10.17 | 10.24 |
| 1624215 s at | FBgn0024807 | 9.79  | 9.79  | 9.57  | 9.55  | 9.29  | 9.55  |
| 1637936 at   | ---         | 8.82  | 8.83  | 8.77  | 8.92  | 8.63  | 8.79  |
| 1640130 at   | FBgn0051678 | 9.46  | 9.46  | 9.33  | 9.37  | 9.48  | 9.46  |
| 1637314 at   | FBgn0003882 | 9.81  | 9.82  | 9.68  | 9.93  | 9.92  | 9.88  |
| 1627656 at   | FBgn0001137 | 7.81  | 7.82  | 8.08  | 7.96  | 7.56  | 7.81  |
| 1624135 at   | FBgn0042712 | 9.12  | 9.12  | 9.28  | 9.36  | 8.99  | 8.93  |
| 1636320 at   | FBgn0031050 | 8.85  | 8.85  | 8.83  | 9.11  | 8.86  | 8.72  |
| 1624103 at   | FBgn0030081 | 8.44  | 8.45  | 8.29  | 8.09  | 8.41  | 8.39  |
| 1627742 at   | FBgn0036199 | 8.61  | 8.61  | 8.83  | 8.66  | 8.74  | 8.73  |
| 1640260 at   | FBgn0000152 | 6.96  | 6.96  | 7.15  | 7.36  | 7.06  | 6.86  |
| 1625242 at   | ---         | 9.14  | 9.14  | 9     | 9.28  | 9.14  | 9.2   |
| 1629793 at   | FBgn0030055 | 8.08  | 8.08  | 7.88  | 8.23  | 8.15  | 7.99  |

|              |                         |       |       |       |       |       |       |
|--------------|-------------------------|-------|-------|-------|-------|-------|-------|
| 1632678 at   | FBgn0033656             | 9.29  | 9.29  | 9.05  | 9.2   | 9.36  | 9.36  |
| 1629549 s at | ---                     | 10.54 | 10.54 | 10.34 | 10.63 | 10.72 | 10.77 |
| 1632373 s at | ---                     | 9.12  | 9.12  | 9.03  | 9.15  | 9.09  | 9.06  |
| 1640068 at   | FBgn0037439             | 8.81  | 8.81  | 9.43  | 9.15  | 8.93  | 8.79  |
| 1637074 at   | FBgn0037544             | 6.94  | 6.94  | 7.07  | 7.23  | 7.07  | 6.92  |
| 1641708 at   | FBgn0039715             | 8.55  | 8.55  | 8.28  | 8.42  | 8.39  | 8.32  |
| 1639691 at   | FBgn0052038             | 9.63  | 9.63  | 9.48  | 9.53  | 9.65  | 9.58  |
| 1639644 at   | FBgn0027094             | 9.53  | 9.53  | 9.72  | 9.77  | 9.65  | 9.38  |
| 1638109 s at | FBgn0035032             | 12.41 | 12.41 | 12.6  | 12.55 | 12.48 | 12.45 |
| 1633131 s at | FBgn0042178             | 9.61  | 9.61  | 10.23 | 9.99  | 9.83  | 9.61  |
| 1632471 at   | FBgn0029957             | 9.03  | 9.03  | 8.96  | 9.2   | 9.02  | 9.02  |
| 1640251 s at | FBgn0000308             | 11.93 | 11.93 | 12.09 | 12.05 | 11.99 | 11.98 |
| 1641170 a at | FBgn0037954             | 9.7   | 9.7   | 9.93  | 9.95  | 9.85  | 9.81  |
| 1623794 at   | FBgn0039740             | 8.53  | 8.53  | 8.37  | 8.44  | 8.5   | 8.6   |
| 1635027 at   | FBgn0051800             | 8.69  | 8.69  | 8.98  | 8.9   | 8.88  | 8.84  |
| 1635709 at   | FBgn0025617             | 10.72 | 10.72 | 10.55 | 10.57 | 10.66 | 10.69 |
| 1630955 at   | FBgn0031422             | 7.8   | 7.8   | 7.83  | 7.62  | 7.94  | 7.98  |
| 1634474 s at | FBgn0036239             | 10.03 | 10.03 | 10.15 | 10.15 | 10.42 | 10.24 |
| 1632198 at   | FBgn0035166             | 7.79  | 7.79  | 7.6   | 7.62  | 7.98  | 7.81  |
| 1633629 at   | FBgn0031736             | 8.25  | 8.25  | 8.47  | 8.4   | 8.31  | 8.13  |
| 1636945 at   | ---                     | 9.98  | 9.98  | 9.84  | 9.96  | 10.1  | 10.12 |
| 1629517 at   | FBgn0031317             | 7.77  | 7.77  | 7.6   | 7.79  | 8.15  | 8.08  |
| 1626213 a at | FBgn0015276             | 9.11  | 9.11  | 9.16  | 9.01  | 9.24  | 9.13  |
| 1626368 at   | FBgn0002524             | 10.17 | 10.17 | 10.2  | 10.35 | 10.23 | 10.19 |
| 1636382 at   | ---                     | 9.84  | 9.84  | 9.93  | 9.86  | 9.92  | 9.89  |
| 1634095 at   | FBgn0028737             | 13.39 | 13.39 | 13.49 | 13.48 | 13.53 | 13.43 |
| 1637260 at   | FBgn0039488 /// FBgn000 | 8.31  | 8.31  | 8.34  | 8.49  | 8.46  | 8.41  |
| 1628146 at   | ---                     | 9.39  | 9.39  | 9.67  | 9.35  | 9.28  | 9.35  |
| 1625990 at   | FBgn0037185             | 9.44  | 9.44  | 9.38  | 9.61  | 9.69  | 9.54  |
| 1636130 at   | ---                     | 9.94  | 9.94  | 10.05 | 10.14 | 9.93  | 9.89  |
| 1638245 at   | FBgn0031834             | 7.21  | 7.21  | 7.32  | 7.28  | 7.64  | 7.56  |
| 1625218 at   | FBgn0037021             | 9.58  | 9.58  | 9.08  | 9.2   | 9.02  | 9.26  |
| 1627473 at   | FBgn0033995             | 9.37  | 9.36  | 9.04  | 9.17  | 9.32  | 9.37  |
| 1629270 at   | FBgn0003512             | 9.2   | 9.2   | 9.05  | 9.54  | 9.49  | 9.24  |
| 1635627 at   | FBgn0027055             | 9.34  | 9.34  | 9.32  | 9.31  | 9.45  | 9.35  |
| 1633598 at   | FBgn0052221             | 8.3   | 8.3   | 8     | 7.96  | 8.16  | 7.99  |



|              |             |       |       |       |       |       |       |
|--------------|-------------|-------|-------|-------|-------|-------|-------|
| 1633074 a at | FBgn0011661 | 12.09 | 12.09 | 12.22 | 12.09 | 12.06 | 12.1  |
| 1640451 at   | ---         | 10.99 | 10.99 | 11.29 | 11.32 | 11.32 | 11.25 |
| 1627325 at   | ---         | 9.66  | 9.66  | 9.45  | 9.66  | 9.74  | 9.66  |
| 1627426 at   | FBgn0033094 | 11.03 | 11.03 | 11.05 | 11.08 | 11.16 | 11.16 |
| 1630841 at   | FBgn0031988 | 9.19  | 9.19  | 9.18  | 9.3   | 9.2   | 9.25  |
| 1633805 a at | FBgn0003317 | 10.14 | 10.14 | 10.11 | 10.28 | 10.3  | 10.31 |
| 1623039 at   | FBgn0033095 | 8.93  | 8.92  | 8.98  | 9.1   | 8.77  | 8.78  |
| 1640892 a at | FBgn0000480 | 10.41 | 10.4  | 10.23 | 10.26 | 10.3  | 10.39 |
| 1636572 at   | FBgn0031464 | 9.17  | 9.16  | 9.02  | 9.25  | 9.07  | 9.05  |
| 1627087 at   | FBgn0023514 | 9.72  | 9.72  | 9.7   | 10    | 9.92  | 9.8   |
| 1631769 at   | FBgn0003169 | 10.35 | 10.35 | 10.01 | 10.23 | 10.14 | 10.37 |
| 1626786 at   | FBgn0033916 | 8.25  | 8.25  | 8.45  | 8.38  | 8.43  | 8.45  |
| 1638735 at   | FBgn0033413 | 10.04 | 10.04 | 9.9   | 10.3  | 10.26 | 10.28 |
| 1641487 a at | FBgn0020653 | 11.09 | 11.08 | 10.94 | 11.22 | 11.31 | 10.99 |
| 1637980 at   | FBgn0000150 | 13.61 | 13.61 | 13.55 | 13.62 | 13.69 | 13.58 |
| 1636205 at   | FBgn0038433 | 8.7   | 8.7   | 8.83  | 8.69  | 8.81  | 8.68  |
| 1629981 at   | FBgn0010397 | 8.43  | 8.42  | 8.63  | 8.05  | 8.16  | 8.38  |
| 1640652 at   | ---         | 8.13  | 8.13  | 8.08  | 8.36  | 8.12  | 8.06  |
| 1637032 at   | FBgn0039625 | 8.82  | 8.82  | 8.82  | 8.77  | 8.81  | 8.83  |
| 1636303 at   | ---         | 14.21 | 14.21 | 14.1  | 14.19 | 14.2  | 14.08 |
| 1635711 s at | FBgn0011747 | 9.91  | 9.91  | 9.88  | 9.79  | 9.84  | 9.91  |
| 1640603 at   | FBgn0052590 | 7.7   | 7.7   | 7.83  | 8.28  | 8.16  | 7.99  |
| 1629342 s at | FBgn0039830 | 12.72 | 12.72 | 12.7  | 12.65 | 12.71 | 12.69 |
| 1638721 s at | FBgn0029971 | 10.93 | 10.93 | 11.12 | 11.11 | 11.13 | 11.05 |
| 1623322 at   | FBgn0033605 | 8.22  | 8.22  | 8.44  | 8.45  | 8.35  | 8.23  |
| 1625974 at   | FBgn0024222 | 8.59  | 8.59  | 8.52  | 8.78  | 8.62  | 8.49  |
| 1623859 at   | ---         | 10.05 | 10.05 | 10.35 | 10.3  | 10.27 | 10.2  |
| 1629359 at   | FBgn0032321 | 8.7   | 8.7   | 8.81  | 8.92  | 8.9   | 8.83  |
| 1628924 a at | FBgn0034963 | 8.63  | 8.62  | 8.63  | 8.69  | 8.72  | 8.68  |
| 1623185 s at | FBgn0011225 | 9.16  | 9.16  | 8.86  | 8.82  | 8.86  | 8.89  |
| 1633069 s at | FBgn0037442 | 8.1   | 8.1   | 7.97  | 8.25  | 8.06  | 8.48  |
| 1631603 at   | ---         | 9.77  | 9.77  | 9.76  | 9.76  | 9.66  | 9.63  |
| 1626106 a at | FBgn0027532 | 9.57  | 9.57  | 9.54  | 9.59  | 9.64  | 9.54  |
| 1634637 a at | ---         | 11.7  | 11.7  | 11.55 | 11.91 | 11.93 | 11.72 |
| 1636530 s at | FBgn0003887 | 12.87 | 12.87 | 12.94 | 13.14 | 13.05 | 12.9  |
| 1636634 a at | FBgn0032456 | 10.46 | 10.46 | 10.36 | 10.39 | 10.38 | 10.55 |

|              |                         |       |       |       |       |       |       |
|--------------|-------------------------|-------|-------|-------|-------|-------|-------|
| 1638658 at   | ---                     | 9.48  | 9.47  | 9.44  | 9.51  | 9.49  | 9.48  |
| 1631379 a at | FBgn0033663             | 11.93 | 11.93 | 11.97 | 12.04 | 11.92 | 11.95 |
| 1634724 at   | FBgn0038968             | 8.98  | 8.98  | 9.08  | 8.92  | 9.04  | 8.83  |
| 1630395 at   | ---                     | 9.25  | 9.25  | 9.38  | 9.56  | 9.21  | 9.14  |
| 1628531 at   | FBgn0028694             | 11.31 | 11.31 | 11.4  | 11.44 | 11.37 | 11.26 |
| 1628257 s at | FBgn0035438             | 11.32 | 11.32 | 11.19 | 11.17 | 11.28 | 11.12 |
| 1623106 s at | FBgn0020496             | 9.97  | 9.96  | 10.2  | 10.08 | 9.94  | 9.95  |
| 1639453 at   | ---                     | 7.78  | 7.78  | 7.63  | 7.76  | 7.95  | 7.82  |
| 1632225 a at | FBgn0029158             | 8.47  | 8.47  | 8.3   | 8.34  | 8.67  | 8.6   |
| 1627946 at   | FBgn0039695             | 7.14  | 7.13  | 7.68  | 6.67  | 6.31  | 7.15  |
| 1641614 at   | FBgn0033159 /// FBgn001 | 13.71 | 13.71 | 13.84 | 13.87 | 13.81 | 13.75 |
| 1624396 at   | ---                     | 9.24  | 9.24  | 9.3   | 9.34  | 9.27  | 9.26  |
| 1638043 a at | FBgn0028497             | 8.47  | 8.47  | 8.66  | 8.84  | 8.71  | 8.6   |
| 1629188 at   | FBgn0036515             | 10.9  | 10.9  | 11.06 | 11.06 | 10.97 | 10.97 |
| 1627380 at   | FBgn0010173             | 11.08 | 11.07 | 11.28 | 11.58 | 11.36 | 11.07 |
| 1627732 s at | FBgn0050415             | 12.12 | 12.12 | 12.25 | 12.03 | 12.1  | 12.14 |
| 1629406 at   | FBgn0041186             | 10.67 | 10.67 | 10.61 | 10.9  | 10.86 | 10.75 |
| 1638876 at   | FBgn0028692             | 11.06 | 11.05 | 11.23 | 11.37 | 11.32 | 11.07 |
| 1637221 at   | FBgn0032486             | 8.21  | 8.21  | 8.4   | 8.62  | 8.52  | 8.47  |
| 1633099 at   | FBgn0031283 /// FBgn003 | 8.66  | 8.66  | 8.42  | 8.73  | 8.71  | 8.79  |
| 1636864 at   | ---                     | 10.87 | 10.87 | 10.63 | 10.76 | 10.75 | 10.98 |
| 1639985 s at | FBgn0000319             | 11.13 | 11.13 | 11.52 | 11.26 | 10.96 | 11.06 |
| 1637767 at   | FBgn0032949             | 12.44 | 12.43 | 12.36 | 12.32 | 12.49 | 12.53 |
| 1625343 at   | FBgn0036548             | 9.07  | 9.07  | 9.4   | 9.47  | 9.29  | 9.14  |
| 1637876 a at | FBgn0036999             | 7.98  | 7.98  | 7.85  | 7.93  | 7.98  | 7.92  |
| 1626729 at   | FBgn0034938             | 8.33  | 8.32  | 8.23  | 8.11  | 8.18  | 8.33  |
| 1633606 s at | FBgn0053199 /// FBgn003 | 9.99  | 9.98  | 9.91  | 9.98  | 10.24 | 10.19 |
| 1625745 at   | ---                     | 7.81  | 7.81  | 7.99  | 8.24  | 7.93  | 7.63  |
| 1638044 a at | FBgn0039136             | 9.55  | 9.54  | 9.49  | 9.69  | 9.63  | 9.68  |
| 1627693 at   | FBgn0037466             | 8.67  | 8.66  | 8.56  | 8.59  | 8.58  | 8.6   |
| 1626382 s at | FBgn0035165             | 10.81 | 10.8  | 10.6  | 10.64 | 10.79 | 10.74 |
| 1639159 at   | FBgn0036301             | 9.87  | 9.87  | 10.05 | 9.74  | 9.79  | 9.82  |
| 1633042 at   | FBgn0038272             | 8.69  | 8.68  | 8.76  | 8.72  | 8.69  | 8.72  |
| 1630050 at   | FBgn0033752             | 8.16  | 8.16  | 7.91  | 8.19  | 8.16  | 8.2   |
| 1630431 s at | FBgn0033021             | 10.97 | 10.97 | 10.97 | 11.3  | 11.19 | 11.12 |
| 1635513 at   | FBgn0037653             | 9.75  | 9.75  | 9.69  | 9.8   | 9.74  | 9.66  |

|              |                         |       |       |       |       |       |       |
|--------------|-------------------------|-------|-------|-------|-------|-------|-------|
| 1628208 at   | FBgn0036726             | 10.63 | 10.63 | 10.56 | 10.55 | 10.66 | 10.66 |
| 1626550 at   | FBgn0052705             | 9.2   | 9.2   | 9.14  | 9.38  | 9.39  | 9.52  |
| 1630370 at   | FBgn0038149             | 11.67 | 11.67 | 11.64 | 11.7  | 11.75 | 11.67 |
| 1630573 at   | FBgn0036511             | 7.15  | 7.15  | 7.25  | 7.29  | 7.06  | 7.04  |
| 1630030 at   | FBgn0033635             | 9.83  | 9.82  | 9.51  | 9.84  | 9.93  | 9.72  |
| 1631153 at   | FBgn0003015             | 12.36 | 12.35 | 12.23 | 12.2  | 12.12 | 12.35 |
| 1629396 a at | FBgn0031993             | 7.02  | 7.01  | 7     | 7.33  | 6.9   | 6.87  |
| 1639416 at   | FBgn0033191             | 10.01 | 10    | 10.17 | 10.29 | 10.05 | 9.95  |
| 1637007 s at | FBgn0030838             | 9.55  | 9.55  | 9.36  | 9.47  | 9.51  | 9.44  |
| 1623989 at   | FBgn0032191             | 10.88 | 10.88 | 10.84 | 11.14 | 10.92 | 10.98 |
| 1624669 at   | FBgn0038861             | 7.92  | 7.92  | 8.41  | 8.27  | 8.13  | 8     |
| 1632189 at   | FBgn0023521             | 8.91  | 8.9   | 8.84  | 9.11  | 8.92  | 8.72  |
| 1625950 a at | FBgn0033635             | 12.2  | 12.19 | 12.36 | 12.1  | 12.28 | 12.26 |
| 1624490 s at | FBgn0001180             | 9.82  | 9.82  | 9.5   | 9.69  | 9.93  | 10.06 |
| 1625840 at   | FBgn0037265             | 7.19  | 7.19  | 7.22  | 7.36  | 7.04  | 7.16  |
| 1623625 at   | FBgn0039402             | 9.54  | 9.53  | 9.52  | 9.42  | 9.55  | 9.55  |
| 1627840 a at | FBgn0005634             | 9.62  | 9.62  | 10.26 | 9.82  | 9.33  | 9.49  |
| 1635506 at   | ---                     | 8.75  | 8.75  | 8.93  | 8.57  | 8.6   | 8.82  |
| 1633754 at   | FBgn0036266             | 8.02  | 8.02  | 8.02  | 8.4   | 8.33  | 8.29  |
| 1633876 at   | FBgn0032521             | 8.7   | 8.69  | 8.52  | 8.93  | 8.92  | 8.75  |
| 1632757 a at | FBgn0037615 /// FBgn003 | 8.36  | 8.36  | 8.6   | 8.47  | 8.37  | 8.69  |
| 1626588 a at | FBgn0032407             | 9.2   | 9.2   | 9.13  | 9.11  | 8.96  | 8.93  |
| 1639459 a at | FBgn0013997             | 9.12  | 9.11  | 9.15  | 9.13  | 8.73  | 8.97  |
| 1631007 at   | FBgn0011703             | 11.03 | 11.02 | 11.29 | 11.46 | 11.31 | 11.02 |
| 1636108 at   | FBgn0036546             | 11.11 | 11.11 | 10.83 | 11.33 | 11.23 | 11.15 |
| 1637893 at   | FBgn0021814             | 9.29  | 9.28  | 9.28  | 9.48  | 9.16  | 9.11  |
| 1627337 at   | FBgn0031241             | 9.84  | 9.83  | 10.02 | 10.05 | 9.63  | 9.73  |
| 1631214 at   | FBgn0033457             | 9.52  | 9.51  | 9.4   | 9.58  | 9.68  | 9.47  |
| 1623076 at   | FBgn0052803             | 9.46  | 9.45  | 9.06  | 9.19  | 9.45  | 9.35  |
| 1634003 at   | FBgn0052685             | 8.08  | 8.07  | 8.39  | 8.3   | 8.17  | 8.21  |
| 1635714 s at | ---                     | 9.36  | 9.36  | 9.4   | 9.45  | 9.28  | 9.14  |
| 1625634 at   | FBgn0010220             | 8.36  | 8.35  | 8.66  | 8.94  | 8.7   | 8.65  |
| 1626367 at   | FBgn0032640             | 10.21 | 10.21 | 10.5  | 10.37 | 10.22 | 10.24 |
| 1630271 at   | FBgn0011771             | 8.81  | 8.81  | 8.81  | 8.81  | 8.84  | 8.72  |
| 1631718 at   | ---                     | 10.72 | 10.71 | 10.84 | 10.65 | 10.92 | 10.92 |
| 1637947 s at | FBgn0050389             | 8.05  | 8.05  | 8.02  | 8.14  | 8.14  | 8.02  |

|              |             |       |       |       |       |       |       |
|--------------|-------------|-------|-------|-------|-------|-------|-------|
| 1627834 a at | FBgn0000114 | 12.79 | 12.78 | 12.84 | 12.76 | 12.79 | 12.84 |
| 1634641 a at | FBgn0033190 | 11.29 | 11.28 | 11.27 | 11.3  | 11.31 | 11.24 |
| 1635818 at   | FBgn0032342 | 8.87  | 8.86  | 8.75  | 8.68  | 8.95  | 8.75  |
| 1625425 a at | FBgn0034138 | 13.82 | 13.82 | 13.87 | 13.92 | 13.92 | 13.88 |
| 1623551 at   | FBgn0036537 | 10.37 | 10.36 | 10.56 | 10.6  | 10.6  | 10.7  |
| 1635063 at   | FBgn0016978 | 9.79  | 9.79  | 9.93  | 10.25 | 9.92  | 9.9   |
| 1640054 at   | ---         | 9.1   | 9.1   | 8.86  | 9.02  | 9.31  | 9.26  |
| 1625768 s at | FBgn0005630 | 11.63 | 11.62 | 11.63 | 11.88 | 11.67 | 11.71 |
| 1629440 at   | FBgn0031639 | 9.1   | 9.09  | 9.32  | 9.37  | 9.17  | 9.1   |
| 1625442 a at | FBgn0003392 | 7.63  | 7.62  | 7.6   | 7.66  | 7.68  | 7.4   |
| 1635972 at   | FBgn0035532 | 9.93  | 9.92  | 9.93  | 10.14 | 9.99  | 10.01 |
| 1628723 at   | FBgn0011824 | 11.13 | 11.12 | 11.82 | 11.31 | 11.19 | 11.22 |
| 1636856 at   | FBgn0041174 | 8.56  | 8.55  | 8.18  | 8.18  | 8.47  | 8.64  |
| 1627123 at   | FBgn0031682 | 9.46  | 9.46  | 9.14  | 9.28  | 9.49  | 9.48  |
| 1641603 s at | ---         | 8.02  | 8.01  | 8.04  | 8.15  | 8.11  | 8.1   |
| 1626986 at   | FBgn0038389 | 8.9   | 8.89  | 9.13  | 9.29  | 9.24  | 9.19  |
| 1627774 a at | FBgn0010413 | 14.29 | 14.28 | 14.38 | 14.38 | 14.36 | 14.32 |
| 1640905 at   | FBgn0034918 | 10.67 | 10.66 | 10.67 | 10.79 | 10.74 | 10.74 |
| 1635954 at   | FBgn0029688 | 7.69  | 7.68  | 7.95  | 7.64  | 7.61  | 7.63  |
| 1624142 a at | ---         | 9     | 8.99  | 9.09  | 9.04  | 8.96  | 9     |
| 1638833 at   | FBgn0030327 | 9.65  | 9.64  | 9.44  | 9.7   | 9.48  | 9.5   |
| 1639060 at   | ---         | 10.36 | 10.35 | 10.32 | 10.66 | 10.56 | 10.51 |
| 1634331 at   | FBgn0021847 | 9.06  | 9.05  | 9.02  | 9.5   | 9.27  | 9.02  |
| 1636921 at   | FBgn0010622 | 7.91  | 7.9   | 8.08  | 8.79  | 8.1   | 7.99  |
| 1636431 at   | FBgn0033769 | 8.76  | 8.75  | 8.54  | 8.64  | 8.69  | 8.67  |
| 1626331 at   | FBgn0033570 | 9.94  | 9.93  | 10.23 | 10.14 | 10    | 9.94  |
| 1623237 at   | FBgn0031696 | 9.01  | 9     | 8.94  | 9.2   | 9.08  | 9.11  |
| 1638312 at   | FBgn0033665 | 7.77  | 7.76  | 7.55  | 7.59  | 7.41  | 7.59  |
| 1637417 at   | FBgn0032513 | 9.43  | 9.43  | 9.76  | 9.94  | 9.53  | 9.54  |
| 1624499 s at | FBgn0030734 | 10.43 | 10.42 | 10.43 | 10.56 | 10.53 | 10.52 |
| 1636198 at   | ---         | 9.33  | 9.32  | 9.2   | 9.02  | 9.12  | 9.18  |
| 1641285 at   | FBgn0015338 | 10.66 | 10.65 | 10.62 | 10.79 | 10.52 | 10.59 |
| 1632915 s at | FBgn0053070 | 9.43  | 9.42  | 9.62  | 9.6   | 9.22  | 9.44  |
| 1632847 at   | FBgn0036406 | 8.24  | 8.23  | 8.17  | 8.08  | 8.01  | 8.18  |
| 1638883 at   | FBgn0029629 | 11.84 | 11.83 | 12.02 | 11.89 | 11.99 | 11.89 |
| 1634053 at   | FBgn0030850 | 10.63 | 10.62 | 10.37 | 10.42 | 10.63 | 10.6  |

|              |                         |       |       |       |       |       |       |
|--------------|-------------------------|-------|-------|-------|-------|-------|-------|
| 1633412 s at | FBgn0029764             | 11.16 | 11.15 | 11.19 | 11.22 | 11.14 | 11.25 |
| 1626652 at   | FBgn0022772             | 10.72 | 10.71 | 10.56 | 10.91 | 10.75 | 10.6  |
| 1640698 at   | FBgn0031478             | 9.34  | 9.33  | 9.06  | 9.11  | 9.32  | 9.27  |
| 1638158 at   | FBgn0038764             | 9.43  | 9.42  | 9.46  | 9.57  | 9.56  | 9.37  |
| 1630925 at   | FBgn0028687             | 11.26 | 11.25 | 11.29 | 11.38 | 11.33 | 11.16 |
| 1638156 at   | FBgn0001084             | 7.93  | 7.92  | 7.56  | 7.92  | 8.05  | 8.02  |
| 1626488 s at | FBgn0028691             | 10.95 | 10.94 | 11    | 11.08 | 11.06 | 10.86 |
| 1638522 at   | FBgn0030039             | 9.19  | 9.18  | 9.12  | 9.33  | 9.15  | 9.17  |
| 1624355 at   | FBgn0015907             | 8.89  | 8.88  | 9.26  | 9.06  | 9.06  | 8.93  |
| 1628092 at   | FBgn0031309             | 9.15  | 9.14  | 8.9   | 9.13  | 9.25  | 9.14  |
| 1632322 at   | FBgn0038809             | 10.29 | 10.28 | 10.3  | 10.44 | 10.23 | 10.23 |
| 1632161 at   | FBgn0026198             | 9.01  | 9     | 8.91  | 8.99  | 9.09  | 9.03  |
| 1626641 s at | FBgn0027657             | 9.79  | 9.78  | 9.98  | 9.82  | 10.11 | 9.94  |
| 1640764 at   | FBgn0003277             | 11.19 | 11.18 | 11.13 | 11.35 | 11.2  | 11.18 |
| 1640782 at   | FBgn0033737             | 9.83  | 9.82  | 9.92  | 9.97  | 9.87  | 9.76  |
| 1628243 at   | FBgn0028472             | 9.17  | 9.16  | 8.97  | 9.03  | 9.04  | 9.13  |
| 1633494 at   | ---                     | 7.02  | 7.01  | 6.54  | 6.64  | 7     | 6.95  |
| 1631652 at   | FBgn0038545             | 9.21  | 9.2   | 8.98  | 9.08  | 9.29  | 9.26  |
| 1632593 at   | ---                     | 8.92  | 8.91  | 8.71  | 9.01  | 8.96  | 9     |
| 1638414 a at | FBgn0036199             | 9.08  | 9.07  | 9.73  | 9.18  | 9.33  | 9.27  |
| 1638752 s at | FBgn0051961             | 7.86  | 7.85  | 7.88  | 7.74  | 8.11  | 7.88  |
| 1636791 s at | FBgn0036053             | 9.84  | 9.83  | 10.12 | 10.25 | 9.97  | 9.76  |
| 1635766 at   | FBgn0000986             | 11.46 | 11.45 | 11.45 | 11.7  | 11.49 | 11.34 |
| 1627518 at   | FBgn0039112             | 9.95  | 9.94  | 9.98  | 10.02 | 10.17 | 9.99  |
| 1630788 at   | FBgn0015282             | 10.76 | 10.75 | 10.76 | 10.91 | 10.88 | 10.71 |
| AFFX-r2-Dro  | FBgn0000042             | 10.47 | 10.46 | 10.21 | 10.32 | 10.29 | 10.24 |
| 1639375 a at | FBgn0037360             | 10.92 | 10.91 | 10.8  | 10.81 | 10.93 | 10.82 |
| 1641129 at   | FBgn0004868             | 12.12 | 12.11 | 12.08 | 12.38 | 12.2  | 12.13 |
| 1637059 s at | FBgn0015657             | 10.83 | 10.82 | 11.03 | 11.07 | 11.32 | 11.17 |
| 1628290 s at | FBgn0032029             | 9.8   | 9.78  | 9.6   | 9.34  | 9.79  | 9.73  |
| 1629867 a at | ---                     | 13.65 | 13.64 | 13.72 | 13.77 | 13.79 | 13.73 |
| 1636942 at   | FBgn0031992             | 10.13 | 10.12 | 10.03 | 10.16 | 9.85  | 9.98  |
| 1638176 at   | FBgn0034590             | 9.34  | 9.33  | 9.27  | 8.91  | 9.09  | 9.12  |
| 1641353 s at | FBgn0052066 /// FBgn006 | 9.49  | 9.47  | 9.51  | 9.3   | 9.24  | 9.4   |
| 1634116 at   | FBgn0037116             | 9.1   | 9.09  | 8.89  | 8.83  | 9.02  | 9     |
| 1640557 at   | FBgn0020443             | 11.33 | 11.31 | 11.4  | 11.4  | 11.39 | 11.38 |

|              |                         |       |       |       |       |       |       |
|--------------|-------------------------|-------|-------|-------|-------|-------|-------|
| 1626508 at   | ---                     | 10.03 | 10.02 | 10.06 | 10.13 | 10.24 | 10.22 |
| 1623998 at   | FBgn0037051             | 10.17 | 10.16 | 10.29 | 10.16 | 10.17 | 10.06 |
| 1628124 at   | FBgn0029928             | 6.77  | 6.76  | 6.78  | 7.09  | 7.08  | 6.8   |
| 1630982 at   | FBgn0034814             | 8.61  | 8.59  | 8.82  | 8.6   | 8.66  | 8.64  |
| 1634481 at   | FBgn0030986             | 8.25  | 8.24  | 8.47  | 8.55  | 8.04  | 8.07  |
| 1637240 a at | FBgn0034366             | 8.14  | 8.12  | 8.24  | 8.4   | 8.25  | 8.17  |
| 1640239 at   | FBgn0050149             | 9.56  | 9.54  | 9.7   | 10.03 | 9.83  | 9.55  |
| 1638427 at   | ---                     | 8.94  | 8.93  | 8.79  | 9     | 9.01  | 8.98  |
| 1640263 at   | FBgn0031776             | 10.09 | 10.08 | 10.15 | 10.25 | 10.18 | 10.06 |
| 1641047 at   | FBgn0032479             | 9.64  | 9.63  | 9.88  | 9.97  | 9.69  | 9.66  |
| 1633284 at   | FBgn0034915             | 10    | 9.99  | 10.38 | 10.12 | 9.86  | 9.93  |
| 1626649 s at | FBgn0051232             | 9.88  | 9.87  | 9.9   | 9.96  | 10.02 | 9.94  |
| 1641621 at   | FBgn0029943             | 8.81  | 8.8   | 8.63  | 8.72  | 8.81  | 8.68  |
| 1634329 at   | FBgn0052579             | 9.58  | 9.57  | 9.3   | 9.25  | 9.6   | 9.63  |
| 1627873 at   | FBgn0038046             | 9.47  | 9.46  | 9.51  | 9.74  | 9.59  | 9.56  |
| 1624321 at   | FBgn0014011             | 9.15  | 9.14  | 8.15  | 8.03  | 8.97  | 8.98  |
| 1626125 at   | ---                     | 8.55  | 8.54  | 8.38  | 8.83  | 8.9   | 8.61  |
| 1641223 at   | FBgn0036615             | 8.6   | 8.59  | 8.61  | 8.9   | 8.73  | 8.79  |
| 1636085 at   | FBgn0037219             | 9.73  | 9.72  | 9.45  | 9.41  | 9.58  | 9.59  |
| 1626706 at   | FBgn0040208             | 9.72  | 9.71  | 9.57  | 9.53  | 9.51  | 9.51  |
| 1640619 at   | FBgn0027587             | 9.44  | 9.43  | 9.54  | 9.66  | 9.54  | 9.47  |
| 1634412 at   | FBgn0039874             | 7.35  | 7.33  | 7.1   | 7.07  | 7.19  | 7.2   |
| 1632978 at   | ---                     | 10.05 | 10.04 | 9.41  | 9.58  | 9.86  | 9.62  |
| 1632429 at   | FBgn0015795             | 11.11 | 11.1  | 11.26 | 10.97 | 11.16 | 11.11 |
| 1631642 at   | FBgn0038765             | 7.67  | 7.66  | 7.66  | 8.13  | 7.97  | 7.98  |
| 1634955 at   | FBgn0011361             | 10.64 | 10.62 | 10.9  | 10.72 | 10.73 | 10.68 |
| 1633387 at   | FBgn0031150             | 8.03  | 8.02  | 7.66  | 7.77  | 7.82  | 7.8   |
| 1628691 at   | ---                     | 11.82 | 11.81 | 11.65 | 11.35 | 11.43 | 11.6  |
| 1626931 a at | FBgn0039713             | 13.93 | 13.91 | 14.04 | 13.97 | 14.04 | 13.98 |
| 1631118 s at | FBgn0013987             | 10.21 | 10.2  | 10.23 | 10.16 | 10.34 | 10.39 |
| 1624278 at   | FBgn0036135             | 9.16  | 9.15  | 9.36  | 9.17  | 9.05  | 8.98  |
| 1638283 at   | FBgn0038146             | 8.56  | 8.55  | 8.7   | 8.32  | 8.49  | 8.4   |
| 1636812 at   | FBgn0035715             | 8.97  | 8.95  | 8.83  | 8.82  | 9.11  | 9.12  |
| 1624335 at   | FBgn0031851             | 8.77  | 8.76  | 9.14  | 9.07  | 8.74  | 8.83  |
| 1630643 at   | FBgn0032715 /// FBgn001 | 9.02  | 9     | 9.22  | 9.33  | 9.16  | 8.96  |
| 1634621 at   | FBgn0039128             | 8.46  | 8.44  | 8.2   | 8.92  | 8.44  | 8.45  |

|              |                         |       |       |       |       |       |       |
|--------------|-------------------------|-------|-------|-------|-------|-------|-------|
| 1631729 at   | FBgn0035867             | 7.87  | 7.86  | 7.79  | 7.91  | 7.96  | 7.91  |
| 1639063 at   | FBgn0032390             | 9.25  | 9.24  | 9.2   | 9.65  | 9.37  | 9.29  |
| 1631749 at   | FBgn0030711             | 10.15 | 10.13 | 10.3  | 10.33 | 10.29 | 10.33 |
| 1623754 s at | FBgn0024733             | 14.25 | 14.23 | 14.17 | 14.24 | 14.27 | 14.25 |
| 1627677 s at | FBgn0036376             | 9.89  | 9.87  | 9.99  | 10.16 | 10.04 | 9.96  |
| 1625725 at   | ---                     | 9     | 8.98  | 9.17  | 9.18  | 9.11  | 9.1   |
| 1634072 s at | ---                     | 10.39 | 10.38 | 10.4  | 10.42 | 10.45 | 10.2  |
| 1628338 at   | FBgn0029825             | 10.92 | 10.9  | 10.59 | 10.81 | 10.64 | 10.73 |
| 1627768 at   | ---                     | 10.45 | 10.43 | 10.62 | 10.46 | 10.55 | 10.47 |
| 1630559 at   | FBgn0034503             | 9.33  | 9.31  | 9.21  | 9.34  | 9.37  | 9.27  |
| 1635927 at   | FBgn0037663             | 7.38  | 7.37  | 7.2   | 7.59  | 7.46  | 7.27  |
| 1626798 a at | FBgn0000228             | 10.45 | 10.44 | 10.32 | 10.32 | 10.44 | 10.56 |
| 1625995 a at | FBgn0004057             | 7.47  | 7.46  | 7.5   | 7.26  | 7.37  | 7.36  |
| 1630405 at   | FBgn0004597             | 8.77  | 8.76  | 8.7   | 8.83  | 8.96  | 8.82  |
| 1633243 at   | ---                     | 9.59  | 9.57  | 9.19  | 9.36  | 9.57  | 9.67  |
| 1632166 at   | FBgn0024314             | 9.53  | 9.52  | 9.59  | 9.78  | 9.57  | 9.38  |
| 1622999 at   | FBgn0011710             | 10.8  | 10.78 | 10.75 | 10.64 | 10.69 | 10.74 |
| 1630950 at   | ---                     | 12.11 | 12.09 | 12.49 | 12.13 | 12.11 | 12.24 |
| 1641084 at   | FBgn0035160             | 9.04  | 9.02  | 9.05  | 9.06  | 8.84  | 8.88  |
| 1636705 at   | FBgn0026207             | 8.66  | 8.64  | 8.49  | 9.07  | 8.79  | 8.55  |
| 1639536 at   | FBgn0029693             | 8.23  | 8.21  | 8.17  | 8.26  | 8.14  | 8.03  |
| 1630438 at   | FBgn0052409             | 9.42  | 9.4   | 9.7   | 9.27  | 9.3   | 9.48  |
| 1628866 at   | FBgn0032678             | 9.01  | 8.99  | 8.97  | 8.99  | 9.16  | 9.11  |
| 1633353 s at | FBgn0033502 /// FBgn003 | 8.02  | 8     | 8.56  | 8.17  | 7.62  | 7.92  |
| 1627331 at   | FBgn0010356             | 7.99  | 7.98  | 8.14  | 8.59  | 8.32  | 8.05  |
| 1639850 at   | FBgn0040346             | 9.69  | 9.67  | 9.7   | 9.71  | 9.78  | 9.66  |
| 1629295 at   | FBgn0029504             | 9.51  | 9.49  | 9.59  | 9.51  | 9.21  | 9.51  |
| 1628751 at   | FBgn0033235             | 9.69  | 9.68  | 9.87  | 9.99  | 9.8   | 9.57  |
| 1632830 s at | FBgn0001122             | 9.31  | 9.3   | 9.35  | 9.14  | 9.27  | 9.17  |
| 1630817 s at | FBgn0032999             | 9.67  | 9.66  | 9.62  | 9.92  | 9.81  | 9.68  |
| 1635098 a at | FBgn0030792             | 9.77  | 9.76  | 9.72  | 9.94  | 9.8   | 9.66  |
| 1641025 at   | FBgn0030518             | 9.52  | 9.5   | 9.67  | 9.69  | 9.54  | 9.43  |
| 1628986 at   | FBgn0033039             | 9.89  | 9.87  | 9.84  | 9.95  | 9.89  | 9.91  |
| 1623473 at   | ---                     | 9.64  | 9.62  | 9.49  | 9.59  | 9.7   | 9.65  |
| 1639013 at   | FBgn0036579             | 8.93  | 8.91  | 8.72  | 8.65  | 8.78  | 8.75  |
| 1637578 at   | ---                     | 11.09 | 11.08 | 11.34 | 11.37 | 11.26 | 11.34 |

|              |             |       |       |       |       |       |       |
|--------------|-------------|-------|-------|-------|-------|-------|-------|
| 1633535 at   | FBgn0028665 | 11.12 | 11.11 | 11.12 | 10.97 | 11.32 | 11.1  |
| 1635099 at   | FBgn0038467 | 8.59  | 8.58  | 8.64  | 9.11  | 9.02  | 8.83  |
| 1630073 at   | FBgn0037305 | 10.16 | 10.14 | 10.33 | 10.56 | 10.15 | 10    |
| 1636950 at   | FBgn0039930 | 8.67  | 8.66  | 9.17  | 8.93  | 9.03  | 8.71  |
| 1633403 at   | ---         | 9.36  | 9.34  | 9.07  | 8.98  | 9.18  | 9.28  |
| 1638931 at   | FBgn0033975 | 8.19  | 8.18  | 8.24  | 8.04  | 7.99  | 7.94  |
| 1628099 at   | FBgn0040237 | 9.84  | 9.83  | 9.99  | 9.92  | 9.89  | 9.81  |
| 1640730 at   | ---         | 9.62  | 9.61  | 9.75  | 9.9   | 9.8   | 9.74  |
| 1624473 at   | FBgn0011425 | 8.89  | 8.87  | 8.91  | 9.35  | 8.87  | 8.72  |
| 1637056 s at | FBgn0034500 | 8.25  | 8.24  | 8.27  | 7.97  | 7.93  | 8.24  |
| 1631626 at   | FBgn0000146 | 9.01  | 9     | 9.75  | 9.44  | 9.57  | 9.61  |
| 1637051 at   | FBgn0036518 | 7.22  | 7.21  | 7.35  | 7.38  | 6.98  | 6.93  |
| 1627668 s at | FBgn0052527 | 10.13 | 10.12 | 9.79  | 9.89  | 10.02 | 10.08 |
| 1622945 a at | ---         | 10.59 | 10.57 | 10.74 | 10.85 | 10.87 | 10.52 |
| 1640954 at   | FBgn0036127 | 8.48  | 8.47  | 8.39  | 8.64  | 8.34  | 8.4   |
| 1641015 at   | FBgn0025458 | 8.84  | 8.82  | 8.61  | 8.87  | 8.92  | 8.77  |
| 1634582 at   | ---         | 8.67  | 8.65  | 9.18  | 8.92  | 8.98  | 9.02  |
| 1635356 at   | FBgn0033754 | 8.53  | 8.51  | 9.22  | 9.14  | 8.69  | 8.8   |
| 1634579 at   | FBgn0043456 | 10.73 | 10.71 | 11.05 | 10.76 | 10.71 | 10.59 |
| 1639646 at   | FBgn0050373 | 8.28  | 8.26  | 8.42  | 8.35  | 8.23  | 8.22  |
| 1638100 s at | FBgn0035133 | 9.22  | 9.2   | 9.06  | 9.13  | 9     | 9.05  |
| 1629744 a at | FBgn0010338 | 8.85  | 8.83  | 8.61  | 8.94  | 8.92  | 8.93  |
| 1638329 at   | FBgn0000826 | 9.45  | 9.43  | 9.33  | 9.56  | 9.54  | 9.22  |
| 1634340 at   | FBgn0027503 | 8.39  | 8.38  | 8.23  | 8.28  | 8.45  | 8.38  |
| 1624714 at   | FBgn0010328 | 10.95 | 10.93 | 11.1  | 10.93 | 11.07 | 11.11 |
| 1636280 s at | FBgn0038111 | 9.39  | 9.37  | 9.26  | 9.58  | 9.47  | 9.36  |
| 1628081 s at | FBgn0038256 | 10.91 | 10.89 | 10.7  | 10.65 | 11    | 10.96 |
| 1627893 at   | FBgn0036039 | 9.78  | 9.76  | 9.42  | 9.54  | 9.68  | 9.81  |
| 1639326 s at | FBgn0040207 | 9.11  | 9.09  | 9.43  | 9.5   | 9.33  | 9.15  |
| 1629445 at   | FBgn0010431 | 12.5  | 12.49 | 12.36 | 12.98 | 12.81 | 12.68 |
| 1627850 at   | FBgn0035987 | 10.38 | 10.36 | 10.28 | 10.2  | 10.19 | 10.64 |
| 1635322 a at | FBgn0033784 | 8.57  | 8.55  | 8.37  | 8.48  | 8.55  | 8.51  |
| 1627660 a at | FBgn0039111 | 8.53  | 8.51  | 8.82  | 8.94  | 8.81  | 8.67  |
| 1630989 a at | ---         | 8.41  | 8.39  | 8     | 8.32  | 8.29  | 8.34  |
| 1624617 at   | FBgn0033451 | 8.92  | 8.9   | 8.86  | 8.95  | 8.76  | 8.66  |
| 1624627 s at | FBgn0039168 | 10.68 | 10.66 | 10.59 | 10.78 | 10.67 | 10.57 |



|              |                         |       |       |       |       |       |       |
|--------------|-------------------------|-------|-------|-------|-------|-------|-------|
| 1623887 at   | FBgn0033686             | 7.92  | 7.9   | 7.49  | 8.51  | 7.97  | 7.83  |
| 1629413 at   | FBgn0031069             | 9.77  | 9.75  | 9.67  | 9.59  | 9.65  | 9.6   |
| 1627872 at   | FBgn0035085             | 8.88  | 8.86  | 8.91  | 9.06  | 8.48  | 8.59  |
| 1630893 at   | FBgn0033989             | 9.33  | 9.32  | 9.15  | 9.25  | 9.16  | 9.08  |
| 1623742 at   | FBgn0039013             | 8.71  | 8.69  | 8.75  | 9.19  | 9.14  | 8.89  |
| 1636539 at   | FBgn0028833             | 10.73 | 10.72 | 10.84 | 10.81 | 10.96 | 10.87 |
| 1623940 at   | FBgn0037242             | 9.79  | 9.77  | 9.66  | 9.77  | 9.84  | 9.82  |
| 1627421 at   | FBgn0030269             | 10.17 | 10.15 | 9.98  | 10.14 | 10.29 | 10.23 |
| 1632297 at   | FBgn0035373             | 8.36  | 8.34  | 8.38  | 8.18  | 8.35  | 8.31  |
| 1624890 s at | FBgn0031768             | 8.9   | 8.88  | 8.91  | 8.99  | 8.92  | 8.91  |
| 1636153 at   | FBgn0034191             | 8.15  | 8.13  | 8.2   | 8.42  | 8.22  | 8.1   |
| 1635011 at   | FBgn0036928             | 11.32 | 11.31 | 11.54 | 11.44 | 11.47 | 11.4  |
| 1636528 at   | FBgn0039562             | 10.48 | 10.46 | 10.57 | 10.49 | 10.38 | 10.37 |
| 1635375 at   | FBgn0038842             | 7.21  | 7.19  | 8.05  | 6.52  | 6.65  | 6.93  |
| 1637776 at   | FBgn0032293             | 8.64  | 8.62  | 8.59  | 8.71  | 8.63  | 8.56  |
| 1635978 at   | FBgn0053199 /// FBgn003 | 10.83 | 10.81 | 10.87 | 10.95 | 11    | 10.97 |
| 1628152 at   | FBgn0024814             | 11.27 | 11.25 | 11.4  | 11.41 | 11.38 | 11.33 |
| 1632630 at   | FBgn0030088             | 8.45  | 8.43  | 8.25  | 8.38  | 8.5   | 8.64  |
| 1635821 at   | ---                     | 8.49  | 8.47  | 8.5   | 8.66  | 8.57  | 8.46  |
| 1629577 at   | FBgn0035295             | 7.73  | 7.71  | 7.95  | 8.04  | 8.06  | 7.96  |
| 1630347 at   | FBgn0036754             | 8.37  | 8.35  | 8.76  | 8.74  | 8.44  | 8.66  |
| 1636206 at   | FBgn0035423             | 12.28 | 12.26 | 12.46 | 12.37 | 12.37 | 12.45 |
| 1633940 at   | FBgn0037710             | 9.81  | 9.79  | 9.65  | 9.75  | 9.73  | 9.74  |
| 1634862 at   | FBgn0032746             | 10.29 | 10.27 | 10.14 | 9.98  | 10.18 | 10.18 |
| 1627434 at   | FBgn0035937             | 7.79  | 7.77  | 7.83  | 7.89  | 7.88  | 7.73  |
| 1638387 at   | FBgn0041702             | 9.88  | 9.86  | 9.82  | 10.02 | 10.03 | 9.96  |
| 1638468 at   | FBgn0050051             | 8.11  | 8.09  | 8.03  | 8.49  | 8.37  | 8.09  |
| 1631550 at   | ---                     | 8.97  | 8.96  | 8.98  | 9.12  | 9.05  | 8.95  |
| 1631942 at   | FBgn0036451             | 9.21  | 9.19  | 9.39  | 9.06  | 9.09  | 9.09  |
| 1635530 at   | ---                     | 11.06 | 11.04 | 11.2  | 11.17 | 11.28 | 11.15 |
| 1632532 s at | FBgn0010516             | 10.78 | 10.76 | 10.87 | 10.53 | 11.02 | 10.84 |
| 1626507 at   | FBgn0030990             | 9.86  | 9.85  | 9.66  | 9.75  | 9.73  | 9.66  |
| 1624080 s at | FBgn0024921             | 10.13 | 10.11 | 10.17 | 10.54 | 10.19 | 10.26 |
| 1628599 at   | FBgn0031599             | 9.23  | 9.21  | 9.24  | 9.96  | 9.41  | 9.11  |
| 1640849 at   | ---                     | 10.65 | 10.63 | 10.85 | 10.76 | 10.68 | 10.66 |
| 1637506 at   | FBgn0052758             | 8.41  | 8.39  | 8.31  | 7.97  | 7.71  | 8.02  |

|              |             |       |       |       |       |       |       |
|--------------|-------------|-------|-------|-------|-------|-------|-------|
| 1629026 at   | FBgn0002069 | 11.19 | 11.17 | 11.53 | 11.46 | 11.42 | 11.26 |
| 1631776 at   | FBgn0037647 | 9.66  | 9.64  | 9.53  | 9.62  | 9.61  | 9.55  |
| 1633661 at   | FBgn0031217 | 10.28 | 10.26 | 10.16 | 10.2  | 10.26 | 10.33 |
| 1632848 at   | FBgn0030573 | 8.29  | 8.27  | 8.01  | 8.34  | 8.56  | 8.54  |
| 1640056 at   | ---         | 10.68 | 10.66 | 10.67 | 10.81 | 10.78 | 10.68 |
| 1639377 at   | FBgn0010410 | 14.26 | 14.24 | 14.27 | 14.31 | 14.33 | 14.22 |
| 1631173 at   | FBgn0030607 | 9.38  | 9.36  | 9.34  | 9.46  | 9.31  | 9.2   |
| 1641403 at   | FBgn0035420 | 9.66  | 9.64  | 9.6   | 9.44  | 9.48  | 9.55  |
| 1641564 a at | FBgn0004903 | 8.98  | 8.96  | 8.75  | 8.8   | 8.98  | 8.82  |
| 1627419 at   | ---         | 10.87 | 10.85 | 10.86 | 11.14 | 11.15 | 11.17 |
| 1640446 s at | FBgn0002611 | 13.5  | 13.48 | 13.57 | 13.57 | 13.62 | 13.51 |
| 1626443 at   | FBgn0026879 | 10.85 | 10.83 | 11.11 | 10.88 | 10.89 | 10.83 |
| 1624353 at   | FBgn0052654 | 10.16 | 10.14 | 9.82  | 9.67  | 9.93  | 10.06 |
| 1625665 at   | FBgn0036462 | 9.93  | 9.91  | 9.79  | 10.17 | 9.98  | 9.92  |
| 1638549 at   | ---         | 9.54  | 9.52  | 9.47  | 9.75  | 9.57  | 9.4   |
| 1630944 s at | FBgn0030890 | 10.57 | 10.55 | 10.76 | 10.68 | 10.59 | 10.59 |
| 1637487 at   | ---         | 8.78  | 8.76  | 8.61  | 8.69  | 8.76  | 8.86  |
| 1627616 at   | FBgn0040235 | 8.97  | 8.95  | 9.18  | 9.41  | 9.31  | 9.11  |
| 1637560 at   | ---         | 11.36 | 11.34 | 11.36 | 11.22 | 11.18 | 11.34 |
| 1640938 at   | FBgn0035640 | 10.45 | 10.43 | 10.25 | 10.44 | 10.55 | 10.36 |
| 1627106 a at | FBgn0032783 | 11.39 | 11.37 | 11.06 | 11.23 | 11.35 | 11.31 |
| 1631856 a at | FBgn0021906 | 10.74 | 10.72 | 10.88 | 10.85 | 10.75 | 10.73 |
| 1632589 at   | FBgn0031947 | 8.51  | 8.49  | 8.65  | 8.81  | 8.74  | 8.63  |
| 1636852 at   | FBgn0030720 | 8.49  | 8.46  | 9.06  | 8.77  | 8.68  | 8.58  |
| 1623546 at   | FBgn0022724 | 8.64  | 8.62  | 8.51  | 8.68  | 8.81  | 8.78  |
| 1636762 a at | FBgn0025682 | 9.25  | 9.22  | 9.48  | 9.08  | 8.97  | 9.26  |
| 1640098 at   | ---         | 9.62  | 9.6   | 9.44  | 9.47  | 9.58  | 9.56  |
| 1626522 at   | FBgn0015610 | 10.89 | 10.87 | 10.86 | 11.1  | 11.21 | 10.88 |
| 1634722 s at | FBgn0026208 | 11.51 | 11.49 | 11.54 | 11.62 | 11.7  | 11.69 |
| 1629363 at   | FBgn0038363 | 9.41  | 9.38  | 9.66  | 9.87  | 9.82  | 9.62  |
| 1633269 at   | FBgn0031771 | 10.36 | 10.34 | 10.51 | 10.58 | 10.6  | 10.32 |
| 1638637 at   | ---         | 7.46  | 7.43  | 7.48  | 7.54  | 7.64  | 7.64  |
| 1640656 a at | FBgn0004401 | 10.87 | 10.85 | 11.15 | 11.38 | 10.9  | 10.96 |
| 1634558 s at | FBgn0001404 | 9.26  | 9.24  | 9.36  | 9.39  | 9.2   | 9.23  |
| 1640691 at   | FBgn0034585 | 9.6   | 9.58  | 9.37  | 9.51  | 9.62  | 9.55  |
| 1623218 s at | FBgn0037471 | 9.61  | 9.59  | 9.21  | 9.36  | 9.38  | 9.46  |

|              |                         |       |       |       |       |       |       |
|--------------|-------------------------|-------|-------|-------|-------|-------|-------|
| 1639384 s at | FBgn0034491             | 9.62  | 9.6   | 9.26  | 9.41  | 9.73  | 9.65  |
| 1629218 at   | FBgn0026015             | 8.09  | 8.07  | 8.08  | 8.07  | 8.15  | 8.16  |
| 1630268 at   | ---                     | 9.14  | 9.12  | 9.18  | 8.97  | 9.14  | 9.09  |
| 1633746 s at | FBgn0000008             | 8.56  | 8.53  | 8.11  | 8.02  | 8.12  | 8.32  |
| 1639087 at   | ---                     | 12.68 | 12.66 | 12.75 | 12.76 | 12.83 | 12.82 |
| 1633019 a at | FBgn0040024             | 10.39 | 10.37 | 10.27 | 10.22 | 10.33 | 10.32 |
| 1630949 s at | FBgn0041191             | 10.41 | 10.39 | 10.48 | 10.47 | 10.44 | 10.41 |
| 1634114 at   | ---                     | 9.46  | 9.44  | 9.07  | 9.17  | 9.21  | 8.5   |
| 1633459 a at | FBgn0020439             | 9.18  | 9.16  | 9.83  | 9.21  | 9.04  | 8.93  |
| 1625002 a at | FBgn0038013             | 9.95  | 9.92  | 9.97  | 10.1  | 10.09 | 9.88  |
| 1626924 a at | FBgn0004922             | 13.46 | 13.44 | 13.64 | 13.61 | 13.63 | 13.54 |
| 1638119 at   | ---                     | 9.31  | 9.29  | 8.93  | 9.01  | 9.34  | 9.26  |
| 1626788 a at | FBgn0039867             | 8.64  | 8.62  | 8.7   | 8.79  | 8.6   | 8.5   |
| 1630990 at   | FBgn0004101             | 9.07  | 9.04  | 9.06  | 9.27  | 9.14  | 8.97  |
| 1626845 at   | FBgn0037632             | 11.42 | 11.4  | 11.57 | 11.58 | 11.5  | 11.37 |
| 1624113 at   | FBgn0033059             | 9.21  | 9.19  | 9.64  | 9.62  | 9.69  | 9.62  |
| 1633503 at   | FBgn0037354             | 10.02 | 10    | 10    | 10.08 | 10.22 | 10.04 |
| 1631180 at   | FBgn0039182             | 10.3  | 10.28 | 10.35 | 10.04 | 10.16 | 10.32 |
| 1630165 s at | FBgn0022764             | 9.81  | 9.79  | 9.86  | 9.82  | 9.85  | 9.92  |
| 1627526 at   | FBgn0033761             | 9.99  | 9.96  | 10.22 | 10.18 | 10.05 | 9.87  |
| 1638247 at   | FBgn0031099             | 7.95  | 7.92  | 7.8   | 7.6   | 7.97  | 7.67  |
| 1627631 s at | FBgn0013981             | 13.51 | 13.48 | 13.43 | 13.62 | 13.56 | 13.55 |
| 1632643 at   | FBgn0032858             | 7.97  | 7.95  | 7.73  | 8.06  | 7.73  | 7.65  |
| 1634086 a at | FBgn0005632             | 7.87  | 7.84  | 8.11  | 8.07  | 8     | 7.82  |
| 1637292 at   | ---                     | 7.8   | 7.78  | 7.89  | 8.01  | 7.48  | 7.51  |
| 1629069 at   | FBgn0035842             | 8.01  | 7.99  | 8.24  | 8.07  | 8.2   | 8.09  |
| 1628053 at   | ---                     | 8.87  | 8.85  | 8.8   | 8.88  | 8.9   | 8.84  |
| 1637048 at   | FBgn0030481             | 8.75  | 8.73  | 8.71  | 8.58  | 8.87  | 8.79  |
| 1641683 at   | FBgn0031711             | 9.64  | 9.62  | 9.71  | 9.96  | 9.88  | 9.67  |
| 1637456 at   | FBgn0027504             | 10.06 | 10.04 | 10.02 | 10.04 | 10.1  | 9.97  |
| 1629983 at   | FBgn0030336             | 10.16 | 10.14 | 9.88  | 9.84  | 9.79  | 9.72  |
| 1626099 s at | FBgn0038627 /// FBgn002 | 10.39 | 10.36 | 10.33 | 10.52 | 10.35 | 10.44 |
| 1634913 s at | FBgn0031969             | 10.18 | 10.15 | 10.1  | 10.3  | 10.03 | 10.11 |
| 1638203 at   | FBgn0036188             | 8.58  | 8.55  | 8.65  | 8.59  | 8.72  | 8.7   |
| 1634194 at   | FBgn0003449             | 10.06 | 10.04 | 10.15 | 10.32 | 10.21 | 10.08 |
| 1625412 at   | FBgn0035600             | 11.39 | 11.36 | 11.61 | 11.63 | 11.53 | 11.52 |

|              |                         |       |       |       |       |       |       |
|--------------|-------------------------|-------|-------|-------|-------|-------|-------|
| 1624618 at   | ---                     | 8.88  | 8.86  | 8.79  | 8.81  | 8.86  | 8.79  |
| 1634377 at   | FBgn0037241             | 9.03  | 9.01  | 8.75  | 8.94  | 9.25  | 9.3   |
| 1625078 at   | FBgn0022023             | 11.11 | 11.08 | 11.34 | 11.26 | 11.37 | 11.22 |
| 1640145 at   | FBgn0010292             | 10.06 | 10.04 | 9.97  | 9.71  | 10.02 | 10.08 |
| 1636476 a at | FBgn0037200             | 8.85  | 8.82  | 8.71  | 8.97  | 8.58  | 8.58  |
| AFFX-Dros-A  | FBgn0000043             | 10.56 | 10.53 | 10.63 | 10.05 | 10.35 | 10.27 |
| 1624906 at   | FBgn0025366 /// FBgn002 | 13.98 | 13.96 | 14.06 | 14.06 | 14.03 | 13.99 |
| 1636636 at   | FBgn0039252             | 9.17  | 9.15  | 9.31  | 9.44  | 9.37  | 9.03  |
| 1634655 at   | FBgn0035059             | 8.7   | 8.68  | 8.29  | 8.58  | 8.75  | 8.66  |
| 1626117 at   | ---                     | 9.52  | 9.49  | 9.36  | 9.53  | 9.54  | 9.44  |
| 1632178 at   | FBgn0004875             | 9.64  | 9.62  | 9.43  | 9.32  | 9.36  | 9.69  |
| 1632503 at   | FBgn0031662             | 9.12  | 9.1   | 9.14  | 9.08  | 9.05  | 9.04  |
| 1632815 at   | FBgn0030701             | 8.82  | 8.8   | 8.89  | 8.95  | 9.03  | 8.88  |
| 1640078 at   | FBgn0037121             | 9.74  | 9.71  | 10.07 | 9.82  | 9.73  | 9.81  |
| 1631198 at   | FBgn0021995             | 8.96  | 8.94  | 9.75  | 9.15  | 9.02  | 8.92  |
| 1624533 s at | FBgn0003862             | 8.3   | 8.27  | 8.44  | 7.92  | 8.39  | 8.36  |
| 1635856 at   | FBgn0033712             | 7.1   | 7.08  | 7.05  | 6.99  | 7.17  | 7.34  |
| 1636075 at   | FBgn0051453             | 9.31  | 9.28  | 9.38  | 9.6   | 9.47  | 9.23  |
| 1625223 a at | FBgn0020249             | 10.84 | 10.82 | 11    | 10.97 | 10.98 | 10.88 |
| 1639895 at   | ---                     | 10.71 | 10.68 | 10.51 | 10.68 | 10.82 | 10.62 |
| 1635278 at   | FBgn0032217             | 10.23 | 10.21 | 10.11 | 10.12 | 10.26 | 10.18 |
| 1637269 at   | ---                     | 7.3   | 7.28  | 8.54  | 8.28  | 7.86  | 7.86  |
| 1631837 at   | FBgn0003732             | 11.69 | 11.67 | 11.75 | 11.58 | 11.81 | 11.76 |
| 1637875 a at | FBgn0053084             | 8.01  | 7.99  | 8.18  | 8.2   | 8.33  | 8.33  |
| 1629321 at   | FBgn0005386             | 7.35  | 7.33  | 7.32  | 7.35  | 7.47  | 7.34  |
| 1630851 s at | FBgn0037314             | 11.83 | 11.81 | 11.9  | 11.91 | 11.88 | 11.73 |
| 1636281 at   | ---                     | 8.29  | 8.26  | 8.4   | 8.34  | 8.12  | 8.29  |
| 1624154 at   | FBgn0024227             | 9.07  | 9.05  | 8.86  | 9.58  | 9.22  | 8.98  |
| 1627566 a at | FBgn0037303             | 10.86 | 10.84 | 10.79 | 10.82 | 10.97 | 10.85 |
| 1633161 at   | FBgn0036818             | 7.29  | 7.26  | 7.19  | 7.42  | 7.51  | 7.4   |
| 1632152 at   | FBgn0030521             | 11.43 | 11.41 | 11.55 | 11.12 | 11.42 | 11.31 |
| 1632894 at   | FBgn0030109             | 9.56  | 9.54  | 9.47  | 9.54  | 9.46  | 9.41  |
| 1626743 at   | FBgn0035787             | 7.16  | 7.13  | 7.13  | 7.26  | 7.16  | 7.13  |
| 1622898 a at | FBgn0038307             | 10.3  | 10.27 | 10.43 | 10.42 | 10.36 | 10.34 |
| 1623225 s at | FBgn0037094             | 10.11 | 10.08 | 10.14 | 10    | 10.02 | 9.93  |
| 1634989 at   | FBgn0010100             | 10.64 | 10.61 | 10.98 | 10.89 | 10.78 | 10.68 |

|              |             |       |       |       |       |       |       |
|--------------|-------------|-------|-------|-------|-------|-------|-------|
| 1630239 at   | FBgn0004236 | 12.15 | 12.13 | 12.04 | 12.22 | 12.29 | 12.19 |
| 1640943 at   | FBgn0038948 | 9.19  | 9.17  | 9.03  | 8.89  | 9.37  | 9.16  |
| 1631979 at   | FBgn0036333 | 9.4   | 9.38  | 9.51  | 9.66  | 9.45  | 9.34  |
| 1636773 a at | FBgn0037384 | 9.86  | 9.83  | 9.84  | 10.02 | 10.02 | 9.95  |
| 1634173 at   | FBgn0026761 | 8.78  | 8.76  | 9.15  | 9.37  | 8.89  | 8.79  |
| 1636845 at   | FBgn0031656 | 10.01 | 9.99  | 10.24 | 10.14 | 10.17 | 10.1  |
| 1625490 at   | ---         | 9.4   | 9.38  | 8.95  | 8.9   | 9.15  | 9.03  |
| AFFX-r2-Dro  | FBgn0001128 | 10.52 | 10.49 | 10.34 | 10.58 | 10.83 | 10.66 |
| 1629598 at   | FBgn0013269 | 11.43 | 11.41 | 11.75 | 11.57 | 11.53 | 11.53 |
| 1631015 s at | FBgn0040061 | 14.19 | 14.16 | 14.14 | 14.19 | 14.27 | 14.2  |
| 1628814 s at | FBgn0031453 | 11.72 | 11.7  | 11.91 | 11.67 | 11.83 | 11.8  |
| 1623564 at   | FBgn0036643 | 8.9   | 8.87  | 8.59  | 8.78  | 8.8   | 8.59  |
| 1625496 at   | ---         | 9     | 8.98  | 9.2   | 9.04  | 8.91  | 8.89  |
| 1635628 s at | FBgn0030724 | 10.8  | 10.77 | 10.82 | 10.54 | 10.85 | 10.81 |
| 1639963 at   | FBgn0039623 | 9.17  | 9.14  | 8.97  | 8.98  | 9.18  | 9.28  |
| 1632280 at   | FBgn0035374 | 9.74  | 9.71  | 9.86  | 9.92  | 9.76  | 9.68  |
| 1637251 a at | FBgn0029118 | 8.58  | 8.55  | 8.64  | 8.41  | 8.68  | 8.64  |
| 1633664 at   | FBgn0040239 | 9.44  | 9.42  | 9.17  | 9.44  | 9.56  | 9.58  |
| 1633579 at   | FBgn0032229 | 9.61  | 9.58  | 9.88  | 9.69  | 9.74  | 9.52  |
| 1632007 at   | FBgn0035807 | 10.12 | 10.1  | 9.91  | 10.02 | 10.07 | 10.08 |
| 1628180 at   | FBgn0033507 | 9.48  | 9.46  | 9.88  | 9.63  | 9.61  | 9.62  |
| 1625603 at   | FBgn0039137 | 7.76  | 7.73  | 7.53  | 7.54  | 7.51  | 7.58  |
| 1637466 at   | FBgn0017549 | 9.71  | 9.69  | 9.6   | 9.77  | 9.81  | 9.83  |
| 1641298 at   | FBgn0037926 | 8.41  | 8.38  | 8.68  | 8.4   | 8.3   | 8.25  |
| 1635143 at   | FBgn0036813 | 9.64  | 9.61  | 9.55  | 9.36  | 9.75  | 9.72  |
| 1631739 at   | FBgn0037351 | 13.96 | 13.93 | 14.02 | 13.95 | 13.98 | 13.93 |
| 1636887 s at | FBgn0037120 | 8.92  | 8.9   | 8.99  | 9.22  | 9.32  | 9.45  |
| 1631199 at   | FBgn0030514 | 8.7   | 8.67  | 8.6   | 8.82  | 8.74  | 8.67  |
| 1637144 a at | FBgn0002645 | 10.19 | 10.16 | 10.16 | 10.37 | 10.09 | 10.16 |
| 1634189 at   | FBgn0032700 | 8.53  | 8.51  | 8.47  | 8.86  | 8.51  | 8.5   |
| 1623422 a at | FBgn0051908 | 10.13 | 10.1  | 10.01 | 10.09 | 10.19 | 10.15 |
| 1630825 at   | FBgn0038862 | 8.75  | 8.72  | 8.81  | 9.1   | 8.72  | 8.75  |
| 1625571 at   | FBgn0032215 | 9.36  | 9.34  | 9.25  | 9.43  | 9.49  | 9.58  |
| 1634944 at   | FBgn0002174 | 8.81  | 8.79  | 9.05  | 8.93  | 8.91  | 8.8   |
| 1636440 at   | FBgn0010620 | 9.65  | 9.62  | 9.88  | 10.01 | 9.55  | 9.64  |
| 1638975 at   | FBgn0035109 | 7.43  | 7.41  | 7.24  | 7.62  | 7.55  | 7.38  |

|              |                         |       |       |       |       |       |       |
|--------------|-------------------------|-------|-------|-------|-------|-------|-------|
| AFFX-r2-Dro  | FBgn0001128             | 6.72  | 6.69  | 6.38  | 6.45  | 7.07  | 6.85  |
| 1633745 a at | FBgn0013733             | 9.14  | 9.11  | 9.22  | 8.77  | 8.8   | 9.06  |
| 1635211 at   | ---                     | 8.55  | 8.53  | 8.32  | 8.21  | 8.38  | 8.59  |
| 1625801 s at | FBgn0025637             | 12.09 | 12.06 | 12.04 | 12.05 | 12.29 | 12.2  |
| 1626693 at   | ---                     | 13.95 | 13.92 | 13.97 | 13.99 | 14.06 | 14    |
| 1641560 at   | FBgn0031438             | 9.86  | 9.83  | 9.91  | 10.09 | 10    | 9.83  |
| 1639788 at   | FBgn0010426             | 11.31 | 11.29 | 11.23 | 11.13 | 11.29 | 11.23 |
| 1626237 at   | FBgn0035411             | 11.08 | 11.05 | 10.93 | 10.87 | 10.89 | 11.03 |
| 1634528 at   | FBgn0037743             | 7.45  | 7.42  | 7.66  | 7.57  | 7.43  | 7.39  |
| 1629685 at   | FBgn0035356             | 7.75  | 7.72  | 7.87  | 7.72  | 7.82  | 7.77  |
| 1636638 s at | FBgn0038570             | 10.58 | 10.55 | 10.78 | 10.61 | 10.8  | 10.56 |
| 1628215 s at | ---                     | 8.17  | 8.14  | 8.06  | 7.99  | 8.08  | 8.34  |
| 1631367 at   | FBgn0036127             | 8.8   | 8.78  | 8.88  | 9.16  | 9.04  | 8.84  |
| 1626340 at   | ---                     | 9.16  | 9.13  | 9.48  | 9.41  | 9.1   | 8.93  |
| 1624675 at   | FBgn0026076             | 10.42 | 10.39 | 10.4  | 10.43 | 10.56 | 10.52 |
| 1625150 s at | FBgn0000559             | 13.62 | 13.59 | 13.75 | 13.76 | 13.66 | 13.54 |
| 1630144 at   | FBgn0015617             | 9.28  | 9.25  | 9.34  | 9.25  | 9.42  | 9.35  |
| 1631684 at   | FBgn0030759             | 8.69  | 8.66  | 8.36  | 8.49  | 8.75  | 8.57  |
| 1638701 at   | FBgn0034948             | 9.88  | 9.85  | 9.93  | 10    | 10.12 | 10.06 |
| 1631954 at   | FBgn0037894             | 9.63  | 9.6   | 9.75  | 9.75  | 9.66  | 9.58  |
| 1623686 at   | ---                     | 7.97  | 7.94  | 8.11  | 8.37  | 8.42  | 8.19  |
| 1641654 a at | FBgn0017581             | 11.08 | 11.05 | 11.03 | 10.96 | 11.11 | 10.91 |
| 1639941 at   | FBgn0030137             | 8.4   | 8.37  | 8.64  | 8.77  | 8.68  | 8.57  |
| 1626534 at   | FBgn0003714             | 10.74 | 10.71 | 10.73 | 10.84 | 10.65 | 10.54 |
| 1624782 a at | FBgn0035601             | 12.04 | 12.01 | 12.06 | 12.05 | 12.15 | 12.08 |
| 1640433 a at | FBgn0033636             | 8.94  | 8.91  | 8.95  | 8.88  | 8.99  | 8.98  |
| 1630614 s at | ---                     | 10.44 | 10.41 | 9.62  | 8.83  | 9.13  | 9.82  |
| 1639499 at   | FBgn0030344             | 8.94  | 8.91  | 9.16  | 9.06  | 8.86  | 8.92  |
| 1637066 at   | FBgn0030683             | 9.12  | 9.09  | 8.62  | 9.03  | 9.26  | 9.12  |
| 1636587 at   | FBgn0030969             | 9.43  | 9.4   | 9.24  | 9.39  | 9.56  | 9.49  |
| 1638344 at   | FBgn0032477 /// FBgn003 | 8.06  | 8.03  | 8.05  | 8.3   | 8.1   | 7.98  |
| 1626313 at   | FBgn0015374             | 10.1  | 10.07 | 10.31 | 10.42 | 10.31 | 10.31 |
| 1636446 at   | FBgn0028837             | 9.23  | 9.2   | 9.14  | 9.31  | 9.42  | 9.27  |
| 1623607 at   | ---                     | 8.92  | 8.89  | 8.82  | 8.99  | 8.99  | 8.89  |
| 1629252 at   | FBgn0037282             | 9.14  | 9.11  | 8.88  | 9     | 8.88  | 8.97  |
| 1623379 at   | ---                     | 8.22  | 8.19  | 7.67  | 8     | 8.26  | 8.15  |

|              |             |       |       |       |       |       |       |
|--------------|-------------|-------|-------|-------|-------|-------|-------|
| 1630816 at   | FBgn0035853 | 10.26 | 10.23 | 10.2  | 10.32 | 10.31 | 10.26 |
| 1638652 at   | FBgn0058006 | 8.83  | 8.8   | 8.94  | 8.82  | 9.13  | 8.53  |
| 1623268 a at | ---         | 8.48  | 8.45  | 8.67  | 8.48  | 8.43  | 8.42  |
| 1630455 at   | FBgn0002607 | 13.99 | 13.96 | 14.07 | 14.04 | 14.04 | 13.99 |
| 1627988 at   | FBgn0003279 | 13.63 | 13.6  | 13.74 | 13.64 | 13.66 | 13.57 |
| 1628980 s at | FBgn0036058 | 9.76  | 9.73  | 9.71  | 9.8   | 9.56  | 9.74  |
| 1625537 at   | FBgn0040397 | 7.76  | 7.73  | 7.68  | 7.48  | 7.37  | 7.67  |
| 1636766 at   | FBgn0026585 | 9.48  | 9.45  | 9.89  | 9.31  | 9.47  | 9.56  |
| 1628221 at   | FBgn0032449 | 7.7   | 7.67  | 7.17  | 7.41  | 7.31  | 7.27  |
| 1631541 at   | FBgn0026170 | 12.74 | 12.71 | 12.72 | 12.8  | 12.79 | 12.77 |
| 1634262 s at | FBgn0025674 | 9.53  | 9.5   | 9.34  | 9.45  | 9.61  | 9.38  |
| 1640492 at   | FBgn0035588 | 9.2   | 9.17  | 9.2   | 9.1   | 9.08  | 8.97  |
| 1640997 at   | FBgn0050122 | 10.54 | 10.51 | 10.52 | 10.41 | 10.52 | 10.58 |
| 1628937 s at | FBgn0015778 | 10.32 | 10.29 | 10.31 | 10.11 | 10.27 | 10.42 |
| 1632676 s at | FBgn0039644 | 11.68 | 11.65 | 11.79 | 11.68 | 11.68 | 11.77 |
| 1636770 at   | ---         | 10.26 | 10.23 | 10.55 | 10.31 | 10.31 | 10.2  |
| 1640142 at   | FBgn0037529 | 9.69  | 9.65  | 10.08 | 9.83  | 9.88  | 9.73  |
| 1636020 s at | FBgn0000054 | 10.27 | 10.23 | 10.25 | 10.56 | 10.56 | 10.5  |
| 1634421 at   | FBgn0034073 | 9.07  | 9.04  | 8.88  | 8.64  | 8.96  | 8.89  |
| 1624020 at   | FBgn0002781 | 8.84  | 8.81  | 8.89  | 8.89  | 8.96  | 8.83  |
| 1640655 s at | ---         | 9.15  | 9.12  | 8.92  | 9.11  | 8.97  | 8.91  |
| 1625076 at   | FBgn0000114 | 12.8  | 12.77 | 12.67 | 12.69 | 12.78 | 12.85 |
| 1623650 a at | FBgn0033050 | 9.27  | 9.24  | 9.26  | 9.59  | 9.56  | 9.49  |
| 1625117 at   | FBgn0031046 | 9.81  | 9.78  | 9.58  | 9.39  | 9.73  | 9.75  |
| 1638270 at   | FBgn0027054 | 10.3  | 10.27 | 10.39 | 10.56 | 10.46 | 10.33 |
| 1636044 at   | FBgn0015816 | 8.45  | 8.41  | 8.55  | 8.59  | 8.34  | 8.21  |
| 1625233 at   | ---         | 8.46  | 8.43  | 8.64  | 8.6   | 8.8   | 8.7   |
| 1639477 s at | FBgn0038224 | 12.1  | 12.07 | 12.25 | 12.13 | 12.17 | 12.09 |
| 1633967 at   | FBgn0031657 | 9.27  | 9.24  | 9.54  | 9.19  | 9.4   | 9.47  |
| 1629382 at   | ---         | 9.99  | 9.95  | 9.72  | 9.84  | 10    | 9.96  |
| 1632390 at   | FBgn0034443 | 10.07 | 10.04 | 9.85  | 9.89  | 9.95  | 10.01 |
| 1625217 at   | FBgn0038578 | 7.71  | 7.67  | 7.79  | 8.23  | 7.91  | 7.68  |
| 1639312 at   | ---         | 13.81 | 13.77 | 13.9  | 13.81 | 13.87 | 13.8  |
| 1636822 s at | FBgn0036401 | 11.26 | 11.23 | 11.19 | 11.29 | 11.36 | 11.31 |
| 1637966 at   | FBgn0030018 | 10.21 | 10.18 | 10.01 | 10    | 10.12 | 10.28 |
| 1631227 at   | FBgn0038858 | 8.9   | 8.87  | 8.98  | 9.1   | 8.92  | 8.87  |

|              |             |       |       |       |       |       |       |
|--------------|-------------|-------|-------|-------|-------|-------|-------|
| 1625902 at   | FBgn0030638 | 8.68  | 8.64  | 8.64  | 8.77  | 8.71  | 8.52  |
| 1640746 at   | FBgn0037731 | 9.27  | 9.24  | 9.74  | 9.49  | 9.42  | 9.42  |
| 1627458 at   | ---         | 9.23  | 9.19  | 9.32  | 9.31  | 9.36  | 9.24  |
| 1629501 at   | FBgn0030673 | 7.3   | 7.27  | 7.03  | 7.32  | 7.61  | 7.45  |
| 1629593 at   | FBgn0035475 | 8.02  | 7.99  | 7.68  | 7.95  | 8.36  | 8.16  |
| 1631994 a at | FBgn0036122 | 7.45  | 7.42  | 7.57  | 7.89  | 7.35  | 7.11  |
| 1629018 a at | FBgn0032000 | 9.41  | 9.37  | 9.4   | 9.4   | 9.52  | 9.51  |
| 1625377 at   | ---         | 9.3   | 9.27  | 9.3   | 9.19  | 9.08  | 9.19  |
| 1629345 at   | FBgn0030943 | 10.05 | 10.01 | 10.07 | 10.05 | 10.2  | 10.11 |
| 1633517 at   | FBgn0034313 | 10.24 | 10.21 | 10.26 | 10.36 | 10.28 | 10.35 |
| 1635596 at   | FBgn0034210 | 8.9   | 8.87  | 8.71  | 8.94  | 8.86  | 8.85  |
| 1637917 s at | FBgn0003870 | 9.15  | 9.12  | 8.74  | 8.74  | 8.63  | 8.9   |
| 1624364 at   | FBgn0039566 | 9.14  | 9.11  | 9.25  | 9.31  | 9.2   | 8.98  |
| 1628278 at   | FBgn0036375 | 8.72  | 8.69  | 8.46  | 8.62  | 8.78  | 8.65  |
| 1628306 at   | FBgn0003744 | 10.07 | 10.04 | 9.94  | 10.13 | 10.14 | 10.11 |
| 1625019 at   | FBgn0016762 | 7.76  | 7.73  | 7.9   | 7.69  | 7.83  | 7.69  |
| 1625051 at   | FBgn0013343 | 9.34  | 9.31  | 9.41  | 9.39  | 9.35  | 9.33  |
| 1629148 a at | ---         | 9.48  | 9.44  | 9.32  | 9.55  | 9.53  | 9.41  |
| 1640594 at   | FBgn0029823 | 11.07 | 11.04 | 11.53 | 11.46 | 11.28 | 10.86 |
| 1634975 at   | FBgn0040284 | 12.01 | 11.97 | 11.91 | 12.18 | 12.04 | 12.01 |
| 1635039 at   | FBgn0034707 | 6.93  | 6.9   | 6.71  | 7.21  | 7.15  | 6.82  |
| 1630916 at   | FBgn0024326 | 7.04  | 7.01  | 7.44  | 7.18  | 6.98  | 7.12  |
| 1627866 at   | FBgn0040268 | 8.48  | 8.45  | 8.48  | 8.53  | 8.5   | 8.47  |
| 1626902 a at | FBgn0015790 | 11.27 | 11.24 | 11.26 | 11.28 | 11.25 | 11.19 |
| 1624656 s at | FBgn0024983 | 8.53  | 8.5   | 8.58  | 8.62  | 8.44  | 8.39  |
| 1636056 at   | FBgn0010409 | 14.05 | 14.02 | 14.1  | 14.08 | 14.14 | 14.08 |
| 1630996 s at | FBgn0035432 | 8.89  | 8.86  | 9.29  | 8.98  | 8.71  | 8.67  |
| 1638155 at   | FBgn0038314 | 7.6   | 7.56  | 7.93  | 8.33  | 7.82  | 7.66  |
| 1629384 at   | FBgn0039654 | 7.85  | 7.82  | 8.24  | 8.38  | 7.98  | 7.77  |
| 1628488 at   | FBgn0039492 | 9.25  | 9.21  | 9.14  | 9.06  | 9.23  | 9.15  |
| 1638059 at   | FBgn0021825 | 9.37  | 9.33  | 9.41  | 9.65  | 9.57  | 9.4   |
| 1636322 at   | FBgn0030035 | 8.79  | 8.76  | 8.94  | 9.17  | 8.79  | 8.68  |
| 1628319 s at | ---         | 8.96  | 8.92  | 8.68  | 8.51  | 8.74  | 8.88  |
| AFFX-CreX-5  | ---         | 13.58 | 13.55 | 13.45 | 13.64 | 13.46 | 13.37 |
| 1623081 at   | ---         | 9.92  | 9.89  | 10.07 | 10.11 | 9.97  | 9.88  |
| 1630634 s at | FBgn0015756 | 13.81 | 13.77 | 13.87 | 13.9  | 13.86 | 13.78 |



|              |                         |       |       |       |       |       |       |
|--------------|-------------------------|-------|-------|-------|-------|-------|-------|
| 1623158 s at | FBgn0030318             | 8.29  | 8.26  | 8.23  | 8.38  | 8.06  | 8.13  |
| 1640999 at   | ---                     | 7.68  | 7.65  | 7.34  | 7.61  | 8.14  | 8.06  |
| 1625702 s at | ---                     | 9.79  | 9.75  | 9.55  | 9.65  | 9.88  | 9.82  |
| 1639984 at   | FBgn0040080             | 8.92  | 8.89  | 8.88  | 9.16  | 9.18  | 9.06  |
| 1634541 a at | FBgn0033088             | 9.15  | 9.11  | 8.87  | 9.03  | 9.17  | 9.14  |
| 1631433 at   | FBgn0036018             | 8.19  | 8.16  | 8.47  | 8.29  | 8.19  | 8.06  |
| 1630283 at   | FBgn0035273 /// FBgn001 | 10.22 | 10.18 | 10.27 | 10.19 | 10.48 | 10.25 |
| 1636314 at   | FBgn0010438             | 11.7  | 11.67 | 11.85 | 11.79 | 11.7  | 11.61 |
| 1638642 at   | FBgn0031497             | 10.24 | 10.21 | 10.4  | 10.43 | 10.32 | 10.02 |
| 1633951 at   | ---                     | 10.71 | 10.68 | 10.92 | 10.78 | 10.74 | 10.61 |
| 1632462 at   | FBgn0037358             | 10.43 | 10.4  | 10.51 | 10.57 | 10.53 | 10.42 |
| 1625505 at   | FBgn0035159             | 6.83  | 6.79  | 6.81  | 7.02  | 7.34  | 7.23  |
| 1623424 a at | FBgn0011300             | 9.14  | 9.11  | 8.71  | 8.66  | 9.04  | 9.03  |
| 1633701 at   | ---                     | 8.07  | 8.03  | 8.31  | 8.48  | 8.46  | 8.13  |
| 1628714 at   | FBgn0033475             | 10.41 | 10.38 | 10.25 | 10.77 | 10.41 | 10.28 |
| 1624905 at   | FBgn0034176             | 9.79  | 9.76  | 9.56  | 9.67  | 9.78  | 9.7   |
| 1631049 at   | FBgn0011742             | 9.87  | 9.83  | 9.66  | 9.63  | 9.8   | 9.75  |
| 1635501 at   | ---                     | 10.86 | 10.82 | 10.89 | 11.27 | 11.09 | 10.91 |
| 1640624 s at | ---                     | 11.55 | 11.52 | 11.69 | 11.73 | 11.63 | 11.58 |
| 1632568 at   | FBgn0037538             | 8.69  | 8.65  | 8.61  | 8.79  | 8.79  | 8.65  |
| 1625594 s at | FBgn0022382             | 9.45  | 9.42  | 9.52  | 9.76  | 9.51  | 9.31  |
| 1630506 at   | FBgn0031457             | 8.43  | 8.4   | 8.26  | 8.28  | 8.36  | 8.38  |
| 1629756 at   | FBgn0027537             | 9.49  | 9.46  | 9.68  | 10    | 9.8   | 9.57  |
| 1634943 at   | FBgn0015287             | 10.58 | 10.54 | 10.73 | 11.05 | 10.92 | 10.71 |
| 1628472 at   | FBgn0028969             | 10.41 | 10.37 | 10.15 | 10.08 | 10.42 | 10.29 |
| 1628149 a at | FBgn0044826             | 9.7   | 9.67  | 9.8   | 9.62  | 9.7   | 9.66  |
| 1636745 at   | FBgn0037770             | 10.23 | 10.2  | 10.21 | 10.07 | 10.21 | 10.23 |
| 1624280 at   | FBgn0030007             | 9.36  | 9.32  | 9.37  | 9.53  | 9.46  | 9.16  |
| 1630329 at   | FBgn0030486             | 9.33  | 9.3   | 9.22  | 9.17  | 9.58  | 9.48  |
| 1630343 at   | ---                     | 10.48 | 10.45 | 10.32 | 10.4  | 10.55 | 10.49 |
| 1634417 s at | FBgn0035046             | 10.72 | 10.69 | 10.81 | 10.88 | 10.83 | 10.72 |
| 1629084 at   | ---                     | 8.39  | 8.35  | 8.6   | 8.51  | 8.58  | 8.34  |
| 1625332 at   | FBgn0033236             | 10.43 | 10.4  | 10.45 | 10.55 | 10.48 | 10.52 |
| 1633430 at   | FBgn0010422             | 9.71  | 9.68  | 9.73  | 9.72  | 9.8   | 9.8   |
| 1625700 a at | FBgn0011241             | 9.09  | 9.05  | 9.15  | 9.3   | 9.31  | 9.18  |
| 1641321 a at | FBgn0036566             | 10.54 | 10.51 | 10.35 | 10.48 | 10.4  | 10.54 |

|              |             |       |       |       |       |       |       |
|--------------|-------------|-------|-------|-------|-------|-------|-------|
| 1638889 at   | FBgn0029873 | 10.34 | 10.31 | 10.28 | 10.23 | 10.31 | 10.31 |
| 1624570 a at | FBgn0011289 | 10.91 | 10.87 | 10.78 | 10.85 | 10.9  | 10.87 |
| 1623836 at   | FBgn0011272 | 13.85 | 13.81 | 14    | 13.91 | 13.94 | 13.87 |
| 1631695 at   | FBgn0040797 | 7.04  | 7     | 6.78  | 6.71  | 6.86  | 7     |
| 1633854 at   | FBgn0011762 | 8.52  | 8.49  | 8.43  | 8.66  | 8.75  | 8.54  |
| 1625465 a at | FBgn0038924 | 9.92  | 9.88  | 9.93  | 9.92  | 9.88  | 9.76  |
| 1635070 at   | FBgn0035726 | 11.1  | 11.07 | 11.25 | 11.16 | 11.15 | 11.06 |
| 1633736 at   | FBgn0032690 | 8.66  | 8.62  | 8.93  | 8.96  | 8.6   | 8.49  |
| 1629207 at   | FBgn0032350 | 11.3  | 11.27 | 11.25 | 10.99 | 11.3  | 11.3  |
| 1641116 at   | ---         | 10.24 | 10.2  | 10.02 | 10.17 | 10.05 | 10.09 |
| 1635910 at   | FBgn0037582 | 9.89  | 9.86  | 9.85  | 9.91  | 10.04 | 9.96  |
| 1625905 at   | FBgn0035243 | 9.11  | 9.07  | 9     | 9.08  | 9     | 9.08  |
| 1624948 at   | FBgn0037739 | 9.79  | 9.76  | 9.75  | 9.86  | 9.82  | 9.77  |
| 1624243 at   | FBgn0032910 | 9.38  | 9.34  | 9.07  | 9.53  | 9.33  | 9.27  |
| 1638938 at   | FBgn0026582 | 8.56  | 8.52  | 8.48  | 8.92  | 9     | 8.6   |
| 1625320 at   | ---         | 8.68  | 8.64  | 8.65  | 8.95  | 8.9   | 8.8   |
| 1631351 s at | FBgn0030101 | 8.83  | 8.79  | 8.27  | 8.55  | 8.69  | 8.52  |
| 1640418 at   | FBgn0002783 | 11.15 | 11.11 | 10.9  | 11.02 | 11.13 | 11.08 |
| 1640382 at   | FBgn0030504 | 10.04 | 10    | 10.34 | 10.02 | 10.03 | 10.04 |
| 1637159 at   | FBgn0030610 | 9.71  | 9.67  | 9.76  | 9.71  | 9.74  | 9.7   |
| 1640900 at   | FBgn0038742 | 10.08 | 10.04 | 9.87  | 9.62  | 10.24 | 9.95  |
| 1640797 at   | FBgn0032833 | 12.05 | 12.02 | 12.22 | 12.14 | 12.17 | 12.16 |
| 1632554 at   | FBgn0037633 | 7.7   | 7.66  | 8.28  | 8.07  | 8.01  | 7.9   |
| 1627472 at   | FBgn0000084 | 10.41 | 10.37 | 10.33 | 10.26 | 10.27 | 10.13 |
| 1628621 at   | FBgn0039765 | 9.19  | 9.15  | 9.38  | 9.19  | 9.18  | 9.09  |
| 1624180 at   | FBgn0030196 | 9.54  | 9.5   | 9.48  | 9.66  | 9.64  | 9.61  |
| 1638157 at   | FBgn0038552 | 9.6   | 9.56  | 9.48  | 9.63  | 9.66  | 9.64  |
| 1625393 s at | FBgn0036987 | 8.63  | 8.6   | 8.36  | 8.98  | 8.34  | 8.48  |
| 1626390 at   | FBgn0032409 | 8.02  | 7.99  | 7.99  | 8.24  | 8.1   | 7.99  |
| 1634869 at   | FBgn0025352 | 10.22 | 10.18 | 10.19 | 10.11 | 10.29 | 10.09 |
| 1638009 s at | FBgn0037715 | 9.77  | 9.73  | 9.92  | 10.04 | 10.16 | 10.19 |
| 1638011 a at | FBgn0016693 | 8.99  | 8.96  | 9.47  | 9.23  | 9.06  | 8.86  |
| 1623991 s at | FBgn0033109 | 11.62 | 11.58 | 11.58 | 11.68 | 11.71 | 11.59 |
| 1638849 a at | FBgn0029672 | 9.84  | 9.8   | 9.59  | 9.6   | 9.73  | 9.7   |
| 1633549 s at | ---         | 11.13 | 11.1  | 11.1  | 11.15 | 11.24 | 11.17 |
| 1634613 s at | ---         | 12.08 | 12.04 | 11.71 | 11.85 | 11.75 | 11.86 |

|              |             |       |       |       |       |       |       |
|--------------|-------------|-------|-------|-------|-------|-------|-------|
| 1635704 at   | FBgn0030468 | 10.91 | 10.87 | 10.82 | 11.05 | 10.95 | 10.9  |
| 1633865 at   | FBgn0037667 | 8.52  | 8.48  | 8.62  | 9.06  | 8.69  | 8.45  |
| 1630632 s at | FBgn0029704 | 11.28 | 11.24 | 11.43 | 11.44 | 11.27 | 11.21 |
| 1638832 at   | FBgn0033912 | 14.22 | 14.19 | 14.07 | 14.09 | 14.22 | 14.17 |
| 1628610 at   | FBgn0031977 | 11.34 | 11.3  | 11.45 | 11.45 | 11.36 | 11.26 |
| 1627532 at   | ---         | 9.81  | 9.77  | 9.61  | 10.02 | 9.86  | 9.75  |
| 1639286 s at | ---         | 9.97  | 9.93  | 9.93  | 10.02 | 9.89  | 9.86  |
| 1632677 a at | FBgn0034697 | 8.56  | 8.52  | 8.74  | 8.71  | 8.66  | 8.58  |
| 1623250 at   | ---         | 11.33 | 11.29 | 11.46 | 11.6  | 11.47 | 11.33 |
| 1624471 s at | FBgn0000043 | 12    | 11.96 | 12.21 | 11.9  | 11.85 | 11.74 |
| 1641692 at   | FBgn0039379 | 9.45  | 9.42  | 9.33  | 9.46  | 9.6   | 9.47  |
| 1634647 at   | FBgn0037274 | 8.73  | 8.69  | 8.61  | 8.99  | 9.02  | 8.67  |
| 1638673 at   | FBgn0010380 | 10.47 | 10.43 | 10.58 | 10.68 | 10.61 | 10.46 |
| 1627676 at   | FBgn0037250 | 10.09 | 10.05 | 10.01 | 10.04 | 10.1  | 10.08 |
| 1626663 s at | FBgn0027066 | 11.18 | 11.14 | 11.15 | 11.14 | 11.13 | 11.21 |
| 1624029 at   | FBgn0035039 | 9.25  | 9.21  | 9.2   | 9.31  | 9.21  | 9.01  |
| 1625847 at   | ---         | 9.86  | 9.82  | 10    | 10.04 | 9.79  | 9.66  |
| 1627761 at   | FBgn0036930 | 8.4   | 8.36  | 8.73  | 8.24  | 8.4   | 8.47  |
| 1625031 at   | ---         | 9.27  | 9.23  | 9.3   | 9.21  | 9.39  | 9.31  |
| 1641043 at   | FBgn0035824 | 7.02  | 6.98  | 7.07  | 7.44  | 7.2   | 7.17  |
| 1630683 at   | FBgn0028470 | 10.24 | 10.2  | 9.72  | 9.8   | 10.01 | 10.14 |
| 1629496 at   | FBgn0026578 | 9.77  | 9.73  | 9.84  | 9.54  | 9.67  | 9.64  |
| 1641072 at   | FBgn0037327 | 9.61  | 9.57  | 9.45  | 9.73  | 9.68  | 9.59  |
| 1627048 at   | FBgn0032030 | 9.32  | 9.28  | 9.36  | 9.56  | 9.51  | 9.43  |
| 1623683 at   | ---         | 10    | 9.96  | 10.31 | 10.39 | 9.93  | 9.86  |
| 1633447 at   | ---         | 8.93  | 8.89  | 8.88  | 9.2   | 8.96  | 8.9   |
| 1633486 at   | FBgn0030686 | 9.36  | 9.32  | 9.36  | 9.57  | 9.49  | 9.29  |
| 1639102 at   | FBgn0017430 | 9.43  | 9.39  | 9.44  | 9.5   | 9.64  | 9.52  |
| 1623797 at   | FBgn0036999 | 10.28 | 10.24 | 10.16 | 10.19 | 10.2  | 10.21 |
| 1630968 at   | FBgn0035173 | 9.72  | 9.68  | 9.62  | 9.82  | 9.77  | 9.89  |
| 1637598 at   | ---         | 10.96 | 10.92 | 11.04 | 11.08 | 11.07 | 11.05 |
| 1625613 at   | FBgn0014427 | 9.83  | 9.79  | 9.78  | 9.84  | 9.9   | 9.74  |
| 1637615 at   | FBgn0033653 | 8.82  | 8.78  | 8.62  | 8.66  | 8.98  | 8.9   |
| 1635931 at   | ---         | 9.5   | 9.46  | 9.65  | 9.48  | 9.54  | 9.48  |
| 1636436 at   | FBgn0011217 | 11.88 | 11.84 | 11.86 | 11.86 | 11.86 | 11.86 |
| 1641117 a at | FBgn0031195 | 8.71  | 8.67  | 8.32  | 8.56  | 8.34  | 8.29  |

|              |             |       |       |       |       |       |       |
|--------------|-------------|-------|-------|-------|-------|-------|-------|
| 1623861 at   | FBgn0000566 | 10.31 | 10.27 | 10.51 | 10.36 | 10.35 | 10.24 |
| 1624887 at   | FBgn0037624 | 10.86 | 10.82 | 10.99 | 10.75 | 10.95 | 10.76 |
| 1638190 at   | FBgn0037550 | 8.1   | 8.06  | 8.06  | 8.11  | 8.04  | 8.04  |
| 1622931 at   | FBgn0035617 | 8.39  | 8.35  | 7.97  | 8.02  | 8.32  | 8.37  |
| 1623463 at   | FBgn0011726 | 13.41 | 13.37 | 13.39 | 13.63 | 13.55 | 13.43 |
| 1639270 at   | FBgn0034743 | 13.98 | 13.94 | 13.98 | 14    | 14.07 | 13.91 |
| 1636712 at   | FBgn0032987 | 14.19 | 14.15 | 14.08 | 14.12 | 14.17 | 14.19 |
| 1631509 a at | ---         | 9.09  | 9.05  | 9.22  | 9.02  | 9.42  | 9.28  |
| 1629659 s at | FBgn0003031 | 12.5  | 12.46 | 12.51 | 12.58 | 12.45 | 12.51 |
| 1629806 a at | FBgn0052103 | 9.51  | 9.47  | 9.2   | 9.45  | 9.65  | 9.59  |
| 1635895 at   | ---         | 7.1   | 7.06  | 7.13  | 7.29  | 7.26  | 7.14  |
| 1629017 s at | FBgn0005596 | 9.42  | 9.38  | 9.41  | 9.48  | 9.39  | 9.33  |
| 1638068 a at | FBgn0033699 | 13.97 | 13.93 | 14    | 14    | 14.03 | 13.97 |
| 1627326 a at | FBgn0032633 | 8.7   | 8.66  | 8.44  | 8.69  | 8.64  | 8.71  |
| 1631331 a at | FBgn0038538 | 11.98 | 11.94 | 12.04 | 12.2  | 12.13 | 11.9  |
| 1631245 s at | FBgn0036662 | 8.53  | 8.49  | 8.44  | 8.8   | 8.37  | 8.33  |
| 1638349 s at | FBgn0034967 | 13.73 | 13.69 | 13.8  | 13.82 | 13.79 | 13.74 |
| 1639949 s at | FBgn0011284 | 13.93 | 13.88 | 13.97 | 13.94 | 13.99 | 13.92 |
| 1635523 a at | FBgn0036710 | 9.92  | 9.88  | 9.8   | 10    | 10.12 | 9.93  |
| 1636508 at   | FBgn0013303 | 10.01 | 9.97  | 10.12 | 10.19 | 10.14 | 10.1  |
| 1631655 a at | FBgn0052566 | 9.68  | 9.64  | 9.6   | 9.15  | 9.4   | 9.47  |
| 1625055 at   | FBgn0014868 | 9.94  | 9.9   | 9.98  | 10.05 | 9.97  | 9.93  |
| 1634055 at   | FBgn0024956 | 9.91  | 9.87  | 9.91  | 9.96  | 9.98  | 9.89  |
| 1640293 s at | FBgn0037182 | 9.61  | 9.57  | 9.59  | 9.65  | 9.74  | 9.74  |
| 1627043 at   | FBgn0037856 | 7.98  | 7.94  | 8.11  | 7.96  | 7.96  | 7.77  |
| 1635104 s at | FBgn0053188 | 11.05 | 11    | 10.74 | 10.87 | 10.78 | 10.85 |
| 1637193 at   | FBgn0034258 | 10.7  | 10.66 | 10.9  | 10.96 | 10.77 | 10.66 |
| 1631877 a at | ---         | 9.84  | 9.8   | 9.73  | 9.8   | 9.75  | 9.5   |
| 1622896 at   | FBgn0038966 | 7.74  | 7.7   | 7.77  | 8.25  | 7.94  | 7.9   |
| 1623995 at   | FBgn0037328 | 13.57 | 13.53 | 13.7  | 13.68 | 13.71 | 13.61 |
| 1623147 at   | FBgn0051855 | 9.41  | 9.37  | 9.61  | 9.61  | 9.49  | 9.42  |
| 1637735 at   | FBgn0033341 | 9.63  | 9.59  | 9.76  | 9.62  | 9.52  | 9.55  |
| 1629165 at   | FBgn0038300 | 8.24  | 8.2   | 8.28  | 8.57  | 8.33  | 8.33  |
| 1636576 s at | FBgn0004625 | 8.93  | 8.89  | 9.05  | 9.07  | 8.95  | 8.84  |
| 1625291 s at | FBgn0042111 | 7     | 6.96  | 7.26  | 7.35  | 7.43  | 7.3   |
| 1632383 at   | FBgn0037834 | 11.84 | 11.79 | 11.8  | 11.81 | 11.69 | 11.67 |

|              |             |       |       |       |       |       |       |
|--------------|-------------|-------|-------|-------|-------|-------|-------|
| 1628065 at   | FBgn0038128 | 8.1   | 8.06  | 8.05  | 8.25  | 8.19  | 8.11  |
| 1635723 s at | FBgn0053129 | 10.96 | 10.92 | 10.94 | 10.88 | 10.97 | 10.94 |
| 1633012 at   | FBgn0031285 | 10.57 | 10.52 | 10.68 | 10.28 | 10.38 | 10.55 |
| 1641570 s at | FBgn0051683 | 9.32  | 9.28  | 9.76  | 9.11  | 9.29  | 9.2   |
| 1627212 at   | FBgn0003231 | 10.71 | 10.67 | 10.53 | 10.75 | 10.68 | 10.6  |
| 1639928 a at | FBgn0050084 | 8.47  | 8.42  | 8.95  | 8.05  | 7.84  | 8.26  |
| 1632223 at   | FBgn0020305 | 8.48  | 8.43  | 8.58  | 8.48  | 8.54  | 8.59  |
| 1627638 s at | FBgn0003676 | 11.93 | 11.88 | 12.16 | 12.34 | 12.03 | 11.75 |
| 1640048 s at | FBgn0052705 | 8.15  | 8.11  | 7.97  | 8.14  | 8.28  | 8.18  |
| 1633213 at   | FBgn0005411 | 11.25 | 11.2  | 11.19 | 11.46 | 11.4  | 11.24 |
| 1629792 at   | FBgn0040010 | 11.78 | 11.73 | 11.65 | 11.74 | 11.88 | 11.9  |
| 1630750 at   | FBgn0034362 | 10.36 | 10.31 | 10.37 | 10.45 | 10.5  | 10.44 |
| 1640824 at   | FBgn0037108 | 9.67  | 9.62  | 9.56  | 9.5   | 9.63  | 9.7   |
| 1628683 at   | ---         | 8.41  | 8.37  | 8.38  | 8.52  | 8.42  | 8.49  |
| 1625966 at   | FBgn0039461 | 9.06  | 9.01  | 8.95  | 9.35  | 9.11  | 9.03  |
| 1639067 at   | FBgn0028664 | 9.28  | 9.23  | 9.44  | 9.57  | 9.56  | 9.57  |
| 1627403 s at | FBgn0025809 | 10.29 | 10.25 | 10.37 | 10.43 | 10.42 | 10.34 |
| 1634104 a at | ---         | 10.88 | 10.83 | 10.63 | 10.81 | 10.69 | 10.62 |
| 1628088 at   | ---         | 10.41 | 10.37 | 10.42 | 10.63 | 10.54 | 10.48 |
| 1636125 a at | FBgn0040493 | 10.49 | 10.45 | 10.53 | 10.95 | 10.53 | 10.22 |
| 1626494 at   | ---         | 9.48  | 9.44  | 9.6   | 9.94  | 9.55  | 9.33  |
| 1635023 at   | FBgn0030733 | 11.52 | 11.48 | 11.88 | 11.79 | 11.65 | 11.51 |
| 1638005 s at | FBgn0016070 | 12.57 | 12.52 | 12.24 | 12.29 | 12.38 | 12.48 |
| 1627261 s at | FBgn0015622 | 9.99  | 9.95  | 9.9   | 10.13 | 9.97  | 10.02 |
| 1629400 at   | FBgn0035753 | 13.56 | 13.52 | 13.59 | 13.55 | 13.65 | 13.55 |
| 1630987 at   | ---         | 8.17  | 8.13  | 8.03  | 8.62  | 8.26  | 8.04  |
| 1628637 at   | FBgn0033105 | 9.94  | 9.9   | 10.11 | 10.47 | 10.18 | 10.07 |
| 1623924 at   | FBgn0033557 | 8.71  | 8.67  | 9.05  | 8.97  | 8.63  | 8.54  |
| 1635303 at   | FBgn0010265 | 13.74 | 13.7  | 13.86 | 13.8  | 13.8  | 13.72 |
| 1639952 at   | FBgn0028399 | 9.6   | 9.56  | 9.53  | 9.48  | 9.56  | 9.53  |
| 1629876 at   | ---         | 8.84  | 8.8   | 8.83  | 8.89  | 8.85  | 8.89  |
| 1627776 at   | FBgn0039227 | 9.05  | 9     | 8.76  | 8.79  | 8.94  | 8.78  |
| 1628529 a at | ---         | 10.21 | 10.16 | 10.15 | 9.97  | 10.23 | 10.18 |
| 1630214 a at | FBgn0039711 | 8.93  | 8.88  | 9     | 9.12  | 9.24  | 9.02  |
| 1629307 s at | FBgn0010113 | 9.41  | 9.36  | 9.32  | 9.37  | 9.22  | 9.23  |
| 1627667 at   | FBgn0035393 | 8.99  | 8.94  | 9.27  | 9.32  | 9.16  | 9.15  |

|              |                         |       |       |       |       |       |       |
|--------------|-------------------------|-------|-------|-------|-------|-------|-------|
| 1623666 at   | FBgn0036549             | 7.88  | 7.84  | 7.63  | 7.89  | 8.04  | 7.83  |
| 1639296 at   | FBgn0031286             | 7.36  | 7.31  | 7.28  | 7.41  | 7.43  | 7.37  |
| 1623452 at   | FBgn0036588             | 7.97  | 7.93  | 7.88  | 7.69  | 7.85  | 8.17  |
| 1629762 at   | FBgn0038478             | 10.16 | 10.12 | 9.71  | 9.93  | 10.03 | 10.16 |
| 1638146 at   | FBgn0020909             | 9.86  | 9.82  | 9.84  | 9.91  | 9.97  | 9.83  |
| 1624228 at   | ---                     | 9.59  | 9.54  | 9.74  | 9.82  | 9.72  | 9.58  |
| 1625989 at   | FBgn0032259             | 9     | 8.95  | 8.69  | 8.85  | 9.18  | 9.07  |
| 1626566 at   | FBgn0035811             | 11.34 | 11.3  | 11.34 | 11.76 | 11.57 | 11.07 |
| 1636321 s at | FBgn0039209             | 8.49  | 8.45  | 8.35  | 8.26  | 8.39  | 8.46  |
| 1627581 at   | FBgn0033374 /// FBgn003 | 9.13  | 9.08  | 9.34  | 9.3   | 8.98  | 8.84  |
| 1634945 at   | FBgn0032015             | 9.78  | 9.73  | 9.92  | 9.68  | 9.65  | 9.78  |
| 1636649 a at | FBgn0035713             | 9.14  | 9.09  | 9.11  | 9.34  | 9.34  | 9.11  |
| 1625517 at   | FBgn0017578             | 8.93  | 8.89  | 9.19  | 9.15  | 9.08  | 8.97  |
| 1639256 at   | FBgn0032200             | 9.68  | 9.64  | 9.64  | 10    | 9.77  | 9.62  |
| 1625006 at   | FBgn0030365             | 10.14 | 10.09 | 9.83  | 9.99  | 9.82  | 9.76  |
| 1632991 at   | ---                     | 8.53  | 8.49  | 8.45  | 8.2   | 8.53  | 8.63  |
| 1632303 a at | FBgn0039668             | 9.27  | 9.22  | 9.06  | 9.27  | 9.25  | 9.16  |
| 1623384 at   | ---                     | 10.52 | 10.48 | 10.55 | 10.54 | 10.49 | 10.45 |
| AFFX-Dros-A  | FBgn0000043             | 10.85 | 10.81 | 10.97 | 10.45 | 10.74 | 10.66 |
| 1640184 at   | FBgn0033122             | 8.72  | 8.67  | 8.46  | 8.61  | 8.87  | 8.72  |
| 1637905 s at | FBgn0023528             | 9.57  | 9.52  | 9.69  | 9.85  | 9.69  | 9.51  |
| 1638575 at   | FBgn0025815             | 10.67 | 10.63 | 10.94 | 11.1  | 10.84 | 10.62 |
| 1625466 at   | FBgn0037478             | 9.05  | 9     | 8.98  | 9.16  | 8.92  | 8.87  |
| 1637284 at   | FBgn0026056             | 8.76  | 8.71  | 8.64  | 8.88  | 8.83  | 8.9   |
| 1639358 at   | FBgn0034035             | 8.46  | 8.41  | 8.59  | 8.5   | 8.34  | 8.37  |
| 1637424 at   | FBgn0036295             | 8.96  | 8.92  | 8.86  | 9.02  | 8.99  | 9     |
| 1627410 at   | FBgn0027356             | 8.73  | 8.68  | 9.13  | 8.98  | 8.81  | 8.83  |
| 1636596 at   | FBgn0035722             | 9.79  | 9.75  | 9.94  | 9.57  | 9.51  | 9.5   |
| 1640968 a at | ---                     | 10.28 | 10.23 | 10.37 | 10.08 | 10.19 | 10.23 |
| 1630470 s at | FBgn0037261             | 10.84 | 10.8  | 10.66 | 11.09 | 10.98 | 10.8  |
| 1634094 a at | FBgn0034878             | 9.13  | 9.09  | 9.33  | 9.46  | 9.35  | 9.07  |
| 1636191 a at | FBgn0034529             | 7.24  | 7.19  | 7.15  | 7.21  | 7.33  | 7.25  |
| 1640480 at   | FBgn0053051             | 8.31  | 8.26  | 9.2   | 8.67  | 8.31  | 8.24  |
| 1624971 at   | FBgn0040383             | 7.65  | 7.6   | 7.92  | 7.98  | 7.03  | 7.01  |
| 1637342 s at | FBgn0010551             | 12.24 | 12.2  | 12.31 | 12.23 | 12.27 | 12.24 |
| 1641465 at   | FBgn0032445             | 8.99  | 8.94  | 9.21  | 9.1   | 9.16  | 9.1   |

|              |             |       |       |       |       |       |       |
|--------------|-------------|-------|-------|-------|-------|-------|-------|
| 1635389 s at | FBgn0026415 | 10.88 | 10.83 | 10.68 | 10.88 | 10.84 | 10.75 |
| 1639722 s at | FBgn0030745 | 7.1   | 7.06  | 7.38  | 7.15  | 7.52  | 7.3   |
| 1628202 at   | FBgn0035540 | 8.84  | 8.79  | 8.69  | 8.88  | 8.99  | 8.82  |
| 1633389 at   | FBgn0032465 | 9.11  | 9.07  | 9.06  | 9.09  | 9.27  | 9.2   |
| 1628167 s at | FBgn0036967 | 9.46  | 9.41  | 9.37  | 9.6   | 9.59  | 9.63  |
| 1624482 at   | ---         | 10.25 | 10.21 | 10.44 | 10.49 | 10.27 | 10.08 |
| 1625488 s at | FBgn0014020 | 10.26 | 10.21 | 10.28 | 10    | 9.77  | 10.14 |
| 1631046 s at | FBgn0032976 | 9.78  | 9.73  | 9.98  | 9.73  | 9.54  | 9.74  |
| 1627916 s at | FBgn0003204 | 11.5  | 11.45 | 11.31 | 11.27 | 11.31 | 11.41 |
| 1636358 a at | FBgn0040057 | 10.47 | 10.42 | 10.48 | 10.22 | 10.53 | 10.57 |
| 1635647 at   | FBgn0032877 | 8.79  | 8.74  | 8.68  | 8.66  | 8.99  | 8.98  |
| 1627944 a at | FBgn0035318 | 8.18  | 8.13  | 8.22  | 8.37  | 8.33  | 8.08  |
| 1632816 at   | FBgn0023506 | 9.17  | 9.13  | 9.12  | 9.38  | 9.28  | 9.17  |
| 1626337 at   | FBgn0035063 | 8.76  | 8.71  | 9.12  | 8.89  | 8.64  | 8.59  |
| 1636922 at   | FBgn0038057 | 7.71  | 7.66  | 8.19  | 8.09  | 7.83  | 7.79  |
| 1640915 at   | FBgn0034802 | 11.73 | 11.68 | 11.76 | 11.62 | 11.72 | 11.77 |
| 1626942 at   | FBgn0039273 | 9.06  | 9.01  | 8.88  | 9.08  | 9.39  | 9.39  |
| 1626079 a at | FBgn0032955 | 10.82 | 10.77 | 10.83 | 11.03 | 10.97 | 10.85 |
| 1628629 at   | FBgn0050038 | 8.64  | 8.59  | 8.66  | 8.73  | 8.75  | 8.56  |
| 1637990 s at | FBgn0011205 | 8.37  | 8.32  | 8.44  | 8.53  | 8.36  | 8.24  |
| 1631406 at   | FBgn0035024 | 9.06  | 9.01  | 9.18  | 9.19  | 9.18  | 9.01  |
| 1640015 at   | FBgn0030960 | 7.65  | 7.6   | 7.48  | 7.46  | 7.7   | 7.64  |
| 1634868 at   | FBgn0033899 | 8.55  | 8.51  | 8.44  | 8.41  | 8.55  | 8.53  |
| 1623716 at   | FBgn0011744 | 10.71 | 10.66 | 10.8  | 10.96 | 10.83 | 10.64 |
| 1640394 s at | FBgn0004107 | 10.7  | 10.65 | 10.26 | 10.49 | 10.64 | 10.53 |
| 1640574 at   | FBgn0040080 | 12.53 | 12.49 | 12.52 | 12.47 | 12.46 | 12.46 |
| 1627002 at   | FBgn0030121 | 7.6   | 7.55  | 8.13  | 8.41  | 7.98  | 7.75  |
| 1637715 a at | FBgn0035247 | 9.23  | 9.19  | 9.24  | 9.36  | 9.3   | 9.24  |
| 1630131 at   | FBgn0037842 | 8.92  | 8.87  | 8.99  | 8.94  | 9     | 8.99  |
| 1638607 s at | FBgn0029176 | 13.12 | 13.07 | 13.21 | 13.17 | 13.24 | 13.14 |
| 1634304 a at | FBgn0036958 | 9.03  | 8.98  | 8.79  | 8.87  | 9.18  | 9.21  |
| 1625128 a at | ---         | 11.72 | 11.67 | 11.96 | 11.82 | 11.86 | 11.82 |
| 1626823 a at | FBgn0036505 | 9.71  | 9.67  | 9.44  | 9.61  | 9.81  | 9.7   |
| 1640672 at   | FBgn0031830 | 11.46 | 11.41 | 11.77 | 11.77 | 11.63 | 11.48 |
| 1627970 at   | ---         | 8.02  | 7.97  | 8.02  | 7.8   | 8.12  | 8.18  |
| 1629995 at   | FBgn0052104 | 7.63  | 7.58  | 7.77  | 7.76  | 7.66  | 7.47  |

|              |             |       |       |       |       |       |       |
|--------------|-------------|-------|-------|-------|-------|-------|-------|
| 1625169 at   | FBgn0037317 | 8.95  | 8.91  | 8.9   | 9.2   | 9.15  | 9.04  |
| 1633605 at   | FBgn0036889 | 8.78  | 8.73  | 8.56  | 8.57  | 8.7   | 8.66  |
| 1637308 at   | FBgn0024364 | 9.11  | 9.06  | 9.25  | 9.17  | 9.37  | 9.29  |
| 1632098 at   | FBgn0032138 | 10.92 | 10.87 | 11.26 | 11.1  | 11.11 | 10.8  |
| 1639370 at   | FBgn0037368 | 9.27  | 9.22  | 9.19  | 9.31  | 9.33  | 9.34  |
| 1638323 at   | FBgn0037614 | 10.31 | 10.26 | 10.06 | 9.98  | 10.36 | 10.39 |
| 1640748 at   | FBgn0028708 | 9.66  | 9.61  | 9.41  | 9.78  | 9.99  | 9.88  |
| 1623906 at   | FBgn0032189 | 9.43  | 9.38  | 9.23  | 9.55  | 9.67  | 9.58  |
| AFFX-Dm-X(   | ---         | 14.2  | 14.15 | 14.07 | 14.25 | 14.12 | 13.99 |
| 1629859 s at | FBgn0003969 | 9.56  | 9.51  | 9.72  | 9.72  | 9.71  | 9.56  |
| 1638830 at   | FBgn0013746 | 10.23 | 10.18 | 10.39 | 10.53 | 10.42 | 10.36 |
| 1627056 a at | FBgn0010607 | 9.17  | 9.12  | 9.05  | 9.37  | 9.2   | 9.22  |
| 1636351 at   | FBgn0030239 | 10.17 | 10.12 | 10.04 | 10.31 | 10.23 | 10.07 |
| 1638185 at   | FBgn0031188 | 9.48  | 9.43  | 9.31  | 9.59  | 9.57  | 9.44  |
| 1639202 a at | FBgn0039025 | 8.32  | 8.27  | 8.7   | 8.67  | 8.45  | 8.15  |
| 1625060 at   | FBgn0035254 | 7.94  | 7.89  | 8.08  | 7.99  | 8.13  | 8.09  |
| 1630930 a at | FBgn0023441 | 8.65  | 8.6   | 8.71  | 8.15  | 8.38  | 8.61  |
| 1626481 a at | FBgn0026619 | 9.02  | 8.97  | 9     | 8.95  | 8.91  | 8.9   |
| 1640897 at   | FBgn0039875 | 8.43  | 8.38  | 8.52  | 8.43  | 8.24  | 8.37  |
| 1639957 s at | FBgn0028696 | 13.7  | 13.65 | 13.63 | 13.74 | 13.78 | 13.68 |
| 1634904 s at | ---         | 9.89  | 9.84  | 9.79  | 9.69  | 9.84  | 9.8   |
| 1625494 at   | FBgn0034114 | 8.2   | 8.15  | 7.67  | 8.32  | 8.18  | 8.1   |
| 1636190 at   | FBgn0032033 | 8.43  | 8.38  | 8.45  | 8.57  | 8.52  | 8.43  |
| 1639072 at   | FBgn0004864 | 9.2   | 9.15  | 9.26  | 9.16  | 9.08  | 9.22  |
| 1629012 at   | FBgn0028388 | 10.94 | 10.89 | 10.97 | 11.01 | 11.07 | 10.85 |
| 1638868 at   | FBgn0032929 | 10.07 | 10.02 | 10.11 | 10.33 | 10.19 | 10.03 |
| 1630735 at   | FBgn0036853 | 10.24 | 10.19 | 9.98  | 10.21 | 10.14 | 10.05 |
| 1631151 at   | FBgn0039563 | 9.46  | 9.41  | 9.44  | 9.57  | 9.41  | 9.39  |
| 1625297 at   | FBgn0030668 | 8.4   | 8.35  | 8.39  | 8.32  | 8.4   | 8.3   |
| 1639725 at   | ---         | 8.91  | 8.86  | 8.9   | 8.86  | 8.78  | 8.67  |
| 1627034 a at | FBgn0033086 | 8.55  | 8.5   | 8.52  | 8.5   | 8.31  | 8.29  |
| 1633822 at   | FBgn0037087 | 10.04 | 9.99  | 10.08 | 10.06 | 10.05 | 10.01 |
| 1637629 a at | FBgn0029157 | 9.31  | 9.26  | 8.82  | 8.94  | 9.58  | 9.42  |
| 1639552 s at | FBgn0036959 | 8.19  | 8.14  | 8.29  | 8.27  | 8.36  | 8.25  |
| 1637180 at   | FBgn0040778 | 7.38  | 7.33  | 7.08  | 7.65  | 7.68  | 7.65  |
| 1639893 s at | FBgn0014026 | 13.59 | 13.54 | 13.53 | 13.47 | 13.67 | 13.49 |



|              |             |       |       |       |       |       |       |
|--------------|-------------|-------|-------|-------|-------|-------|-------|
| 1638671 at   | ---         | 7.14  | 7.09  | 7.54  | 7.56  | 7.34  | 7.35  |
| 1640523 at   | FBgn0031660 | 10.22 | 10.17 | 10.37 | 10.26 | 10.09 | 10.03 |
| 1624439 at   | FBgn0036642 | 11.04 | 10.99 | 11.06 | 11.03 | 11.16 | 10.96 |
| 1639719 at   | FBgn0005648 | 8.51  | 8.46  | 8.65  | 8.81  | 8.17  | 8.44  |
| 1629882 at   | FBgn0035902 | 7.27  | 7.22  | 6.92  | 7.71  | 7.54  | 7.52  |
| 1624963 at   | FBgn0038549 | 8.32  | 8.26  | 8     | 8.27  | 8.41  | 8.34  |
| 1632914 at   | FBgn0013548 | 9.15  | 9.1   | 8.66  | 9.28  | 9.24  | 8.97  |
| 1639635 s at | FBgn0038297 | 10.4  | 10.35 | 10.14 | 10.15 | 10.18 | 10.17 |
| 1631387 at   | FBgn0050344 | 8.91  | 8.86  | 9.16  | 9.01  | 8.91  | 8.93  |
| 1628903 s at | FBgn0022764 | 7.82  | 7.77  | 7.95  | 7.77  | 7.83  | 7.68  |
| 1630057 at   | FBgn0037603 | 8.53  | 8.48  | 8.34  | 8.03  | 8.54  | 8.51  |
| 1627545 at   | ---         | 9.16  | 9.11  | 9.29  | 9.26  | 9.27  | 9.15  |
| 1624776 a at | FBgn0011361 | 10.82 | 10.76 | 11.04 | 11    | 10.85 | 10.84 |
| 1624205 at   | ---         | 11.75 | 11.7  | 11.8  | 11.83 | 11.88 | 11.77 |
| 1628282 at   | FBgn0038488 | 7.84  | 7.79  | 7.85  | 8.23  | 8.17  | 7.91  |
| 1635394 at   | ---         | 10.78 | 10.73 | 10.72 | 10.7  | 10.63 | 10.67 |
| 1629662 at   | FBgn0029714 | 9.9   | 9.85  | 9.8   | 9.91  | 9.86  | 9.84  |
| 1628299 at   | FBgn0034925 | 9.99  | 9.94  | 9.97  | 10.07 | 10.2  | 10.11 |
| 1636080 a at | ---         | 7.48  | 7.43  | 7.83  | 7.21  | 6.73  | 7.4   |
| 1639614 s at | ---         | 14.49 | 14.44 | 14.44 | 14.48 | 14.47 | 14.44 |
| 1634909 at   | ---         | 9.09  | 9.04  | 9.48  | 9.37  | 9.42  | 9.25  |
| 1637951 at   | FBgn0038235 | 8.03  | 7.98  | 8.29  | 8.28  | 8.28  | 8.2   |
| 1638667 a at | FBgn0038065 | 10.9  | 10.84 | 10.82 | 10.71 | 10.79 | 10.83 |
| 1623073 s at | FBgn0011760 | 12.23 | 12.18 | 12.21 | 12.11 | 12.14 | 12.23 |
| 1629916 at   | ---         | 10.23 | 10.18 | 9.98  | 10.06 | 10.23 | 10.1  |
| 1640962 s at | FBgn0034894 | 10.08 | 10.02 | 9.7   | 9.9   | 10    | 9.97  |
| 1631645 at   | FBgn0034987 | 8.87  | 8.82  | 8.84  | 8.96  | 8.86  | 8.83  |
| 1629241 at   | FBgn0016698 | 8.59  | 8.53  | 8.82  | 8.71  | 8.81  | 8.59  |
| 1634197 at   | FBgn0039882 | 7.55  | 7.5   | 7.5   | 7.72  | 7.76  | 7.78  |
| 1623645 a at | FBgn0029778 | 8.31  | 8.26  | 8.26  | 8.43  | 8.45  | 8.35  |
| 1631074 at   | FBgn0034084 | 8.56  | 8.51  | 8.26  | 8.93  | 8.95  | 8.89  |
| 1629248 at   | ---         | 9.47  | 9.42  | 9.43  | 9.37  | 9.43  | 9.54  |
| 1632134 s at | FBgn0026597 | 9.35  | 9.3   | 9.14  | 9.14  | 9.18  | 9.36  |
| 1632482 at   | FBgn0034914 | 10.14 | 10.09 | 10.06 | 10.36 | 10.2  | 10.11 |
| 1636691 a at | FBgn0032475 | 10    | 9.94  | 9.77  | 9.88  | 9.89  | 9.92  |
| 1636173 s at | FBgn0015765 | 8.96  | 8.91  | 9.06  | 8.97  | 8.96  | 9.02  |

|              |             |       |       |       |       |       |       |
|--------------|-------------|-------|-------|-------|-------|-------|-------|
| 1627505 at   | FBgn0033232 | 8.67  | 8.61  | 8.55  | 8.53  | 8.84  | 8.73  |
| 1626781 at   | FBgn0011826 | 9.9   | 9.84  | 9.98  | 10.13 | 10.06 | 10.07 |
| 1625386 at   | FBgn0000413 | 11.07 | 11.02 | 11.05 | 11.03 | 11.08 | 11.09 |
| 1632850 at   | FBgn0037073 | 10.06 | 10.01 | 10.11 | 9.98  | 9.97  | 9.91  |
| 1627864 at   | FBgn0053130 | 8.17  | 8.12  | 8.02  | 7.91  | 8.14  | 8.25  |
| 1623374 a at | FBgn0024238 | 9.46  | 9.4   | 9.4   | 9.5   | 9.15  | 9.36  |
| 1631648 at   | FBgn0035827 | 10.25 | 10.2  | 10.16 | 10.21 | 10.39 | 10.21 |
| 1634764 at   | FBgn0010078 | 14.41 | 14.35 | 14.2  | 14.19 | 14.32 | 14.27 |
| 1630901 a at | FBgn0039261 | 10.16 | 10.1  | 10    | 10.17 | 10.17 | 10.12 |
| 1639151 a at | ---         | 9.9   | 9.85  | 9.72  | 9.67  | 9.88  | 9.9   |
| 1633870 at   | FBgn0033101 | 9.83  | 9.78  | 9.61  | 9.35  | 9.86  | 9.58  |
| 1639208 at   | FBgn0013756 | 9.7   | 9.65  | 9.53  | 9.48  | 9.57  | 9.56  |
| 1633751 at   | FBgn0037543 | 9.56  | 9.5   | 9.82  | 9.56  | 9.51  | 9.38  |
| 1639357 at   | FBgn0035141 | 8.31  | 8.26  | 8.14  | 8.39  | 8.51  | 8.38  |
| 1629387 s at | FBgn0029095 | 7.24  | 7.18  | 7.84  | 7.51  | 7.57  | 7.45  |
| 1638197 at   | FBgn0023508 | 8.83  | 8.78  | 8.33  | 8.5   | 8.7   | 8.59  |
| 1631772 a at | FBgn0027951 | 8.67  | 8.62  | 8.28  | 8.4   | 7.91  | 8.15  |
| 1640415 at   | FBgn0034951 | 9.63  | 9.57  | 9.59  | 9.49  | 9.44  | 9.42  |
| 1636161 at   | FBgn0035153 | 8.98  | 8.93  | 9.17  | 9.11  | 9.05  | 9     |
| 1633277 at   | FBgn0003941 | 13.5  | 13.45 | 13.6  | 13.57 | 13.61 | 13.51 |
| 1640083 at   | FBgn0033460 | 9.02  | 8.97  | 8.93  | 9.01  | 9.03  | 8.91  |
| 1640700 at   | FBgn0039712 | 9.62  | 9.57  | 9.49  | 9.67  | 9.7   | 9.62  |
| 1629868 s at | FBgn0032130 | 8.15  | 8.1   | 8.05  | 8.1   | 8.29  | 8.36  |
| 1639602 s at | FBgn0035850 | 9.78  | 9.73  | 9.77  | 9.69  | 9.76  | 9.67  |
| 1634461 at   | ---         | 9.62  | 9.56  | 9.33  | 9.38  | 9.47  | 9.47  |
| 1625556 at   | FBgn0025186 | 9.72  | 9.66  | 9.67  | 9.74  | 9.63  | 9.6   |
| 1632269 at   | FBgn0004913 | 13.78 | 13.73 | 13.84 | 13.85 | 13.89 | 13.78 |
| 1626147 s at | FBgn0027842 | 10.23 | 10.17 | 10.24 | 10.29 | 10.16 | 9.99  |
| 1631028 s at | FBgn0021979 | 10.43 | 10.37 | 10.42 | 10.55 | 10.51 | 10.33 |
| 1635116 a at | FBgn0038108 | 8.69  | 8.63  | 8.47  | 8.54  | 8.61  | 8.51  |
| 1641372 at   | FBgn0030553 | 7.85  | 7.8   | 8.13  | 7.99  | 8.39  | 8.33  |
| 1630772 at   | FBgn0010768 | 7.19  | 7.13  | 7.1   | 6.7   | 6.93  | 7.14  |
| 1635619 a at | FBgn0013765 | 9.43  | 9.38  | 9.08  | 9.32  | 9.42  | 9.23  |
| 1639567 at   | ---         | 9.13  | 9.08  | 8.88  | 9.06  | 9.19  | 9.11  |
| AFFX-CreX-3  | ---         | 13.91 | 13.85 | 13.72 | 13.93 | 13.81 | 13.68 |
| 1623214 at   | ---         | 10.49 | 10.44 | 10.46 | 10.2  | 10.42 | 10.5  |

|              |                         |       |       |       |       |       |       |
|--------------|-------------------------|-------|-------|-------|-------|-------|-------|
| 1625714 a at | ---                     | 10.99 | 10.94 | 10.82 | 10.82 | 10.92 | 10.92 |
| 1638453 at   | FBgn0034803             | 9.59  | 9.53  | 9.61  | 9.6   | 9.62  | 9.52  |
| 1632472 s at | FBgn0038364             | 9.55  | 9.5   | 9.54  | 9.21  | 9.59  | 9.53  |
| 1634950 at   | FBgn0038410             | 8.44  | 8.38  | 8.65  | 8.62  | 8.51  | 8.48  |
| 1625459 at   | FBgn0034859             | 7.18  | 7.13  | 7.34  | 8.28  | 7.37  | 7.26  |
| 1632689 at   | FBgn0026566             | 11    | 10.94 | 10.91 | 10.94 | 11.05 | 10.95 |
| 1624222 s at | FBgn0030873             | 9.68  | 9.62  | 9.25  | 9.29  | 9.71  | 9.64  |
| 1637504 at   | FBgn0030114             | 8.51  | 8.45  | 8.19  | 8.04  | 8.38  | 8.29  |
| 1634313 s at | ---                     | 13.15 | 13.09 | 13.28 | 13.27 | 13.26 | 13.14 |
| 1638717 at   | FBgn0029969             | 10.65 | 10.6  | 10.59 | 10.71 | 10.62 | 10.46 |
| 1627131 at   | FBgn0028683             | 9.71  | 9.65  | 9.83  | 10.29 | 9.65  | 9.74  |
| 1628494 a at | FBgn0024315             | 8.88  | 8.82  | 9     | 8.81  | 8.5   | 8.81  |
| 1638615 s at | FBgn0039757             | 13.86 | 13.8  | 13.92 | 13.87 | 13.94 | 13.8  |
| 1640794 at   | FBgn0031061             | 8.53  | 8.48  | 8.57  | 8.68  | 8.82  | 8.64  |
| 1633743 at   | FBgn0004855             | 10.04 | 9.98  | 10.05 | 10.16 | 10.2  | 10.15 |
| 1630287 at   | ---                     | 9.78  | 9.72  | 9.82  | 9.77  | 10.04 | 9.88  |
| 1639045 at   | FBgn0037960             | 7.65  | 7.59  | 7.17  | 7.08  | 7.16  | 7.6   |
| 1626362 at   | FBgn0031399             | 8.24  | 8.18  | 8.3   | 8.22  | 8.26  | 8.12  |
| 1632642 a at | FBgn0031459             | 10.82 | 10.76 | 10.96 | 10.88 | 10.91 | 10.78 |
| 1641745 a at | FBgn0038684             | 9.45  | 9.39  | 9.66  | 9.34  | 9.3   | 9.27  |
| 1629053 at   | FBgn0034060             | 9.34  | 9.28  | 9.3   | 9.34  | 9.29  | 9.28  |
| 1628213 s at | FBgn0043044             | 11.07 | 11.01 | 10.99 | 11.16 | 11.09 | 11.04 |
| 1633204 a at | FBgn0036309             | 9.19  | 9.13  | 8.82  | 8.94  | 8.99  | 9.12  |
| 1633850 at   | ---                     | 7.43  | 7.37  | 7.94  | 7.98  | 7.72  | 7.51  |
| 1623934 at   | ---                     | 9.24  | 9.18  | 9.18  | 9.51  | 9.23  | 9.2   |
| 1626478 at   | ---                     | 8.88  | 8.82  | 8.73  | 8.95  | 8.86  | 8.74  |
| 1636877 at   | FBgn0035483             | 8.84  | 8.78  | 8.63  | 8.75  | 8.89  | 8.73  |
| 1639075 a at | FBgn0037084             | 9.81  | 9.75  | 9.53  | 9.58  | 9.67  | 9.77  |
| 1625458 a at | FBgn0035838 /// FBgn002 | 11.7  | 11.64 | 11.8  | 11.69 | 11.72 | 11.78 |
| 1638135 at   | FBgn0030034             | 10.28 | 10.22 | 8.86  | 8.81  | 9.92  | 9.97  |
| 1637787 a at | FBgn0033897             | 9.52  | 9.46  | 9.5   | 9.62  | 9.72  | 9.56  |
| 1628320 at   | FBgn0037749             | 9.95  | 9.89  | 9.99  | 9.97  | 9.83  | 9.73  |
| 1640632 at   | FBgn0014028             | 9.91  | 9.85  | 10.01 | 9.83  | 9.95  | 9.91  |
| 1630008 at   | FBgn0039149             | 8.34  | 8.28  | 8.11  | 8.04  | 7.9   | 8.01  |
| 1629288 s at | FBgn0030629             | 9.17  | 9.11  | 9.21  | 9.26  | 9.19  | 9.31  |
| 1634577 s at | FBgn0030693             | 10.69 | 10.63 | 10.87 | 10.95 | 10.91 | 10.72 |

|              |                         |       |       |       |       |       |       |
|--------------|-------------------------|-------|-------|-------|-------|-------|-------|
| 1624418 s at | FBgn0035773             | 12.12 | 12.07 | 12.19 | 12.29 | 12.25 | 12.22 |
| 1638940 at   | FBgn0030808             | 9.05  | 8.99  | 8.9   | 8.76  | 8.9   | 8.94  |
| 1633260 at   | ---                     | 10.61 | 10.55 | 10.46 | 10.84 | 10.6  | 10.56 |
| 1633729 a at | FBgn0035060             | 9.34  | 9.28  | 9.27  | 9.36  | 9.29  | 9.31  |
| 1626332 s at | FBgn0035397             | 10.89 | 10.83 | 10.95 | 11.03 | 10.85 | 10.8  |
| 1631376 at   | FBgn0003151             | 11.55 | 11.49 | 11.71 | 11.94 | 11.7  | 11.45 |
| 1636144 s at | FBgn0039113             | 9.52  | 9.46  | 9.34  | 9.73  | 9.55  | 9.48  |
| 1641213 s at | FBgn0037686             | 13.13 | 13.07 | 13.26 | 13.19 | 13.24 | 13.08 |
| 1629065 s at | FBgn0015324             | 11.73 | 11.67 | 11.99 | 11.81 | 11.88 | 11.78 |
| 1630531 at   | FBgn0038853             | 9.08  | 9.02  | 8.85  | 9.01  | 8.92  | 9.14  |
| 1627014 a at | FBgn0051305 /// FBgn003 | 13.43 | 13.37 | 13.39 | 13.4  | 13.41 | 13.39 |
| 1636262 at   | FBgn0036005             | 9.13  | 9.07  | 8.96  | 8.8   | 8.96  | 8.97  |
| 1636972 at   | FBgn0036096             | 8.73  | 8.67  | 8.84  | 8.84  | 8.82  | 8.76  |
| 1631368 s at | FBgn0027567             | 10.63 | 10.57 | 10.37 | 10.34 | 10.44 | 10.43 |
| 1628340 s at | FBgn0011640             | 10.89 | 10.83 | 10.9  | 10.84 | 10.92 | 10.88 |
| 1632649 at   | FBgn0032256             | 8.27  | 8.21  | 8.35  | 8.42  | 8.07  | 8.04  |
| 1631396 at   | FBgn0015553             | 9.87  | 9.81  | 9.9   | 10.06 | 9.8   | 9.71  |
| 1635825 a at | ---                     | 10.36 | 10.3  | 10.5  | 10.51 | 10.42 | 10.35 |
| 1637376 at   | FBgn0050109             | 7.9   | 7.84  | 7.26  | 7.3   | 7.32  | 7.47  |
| 1630477 at   | FBgn0002775             | 9.34  | 9.28  | 8.84  | 9.01  | 9.32  | 9.42  |
| 1639094 at   | FBgn0034626             | 9.63  | 9.57  | 9.07  | 9.21  | 9.66  | 9.71  |
| 1632581 at   | FBgn0033449             | 8.54  | 8.48  | 8.34  | 8.44  | 8.74  | 8.58  |
| 1636502 at   | FBgn0038649             | 9.05  | 8.99  | 8.95  | 9.16  | 9.07  | 8.94  |
| 1633885 s at | FBgn0037955             | 9.34  | 9.28  | 9.45  | 9.4   | 9.36  | 9.23  |
| 1632196 at   | FBgn0020510             | 9.29  | 9.23  | 9.45  | 9.35  | 9.34  | 9.25  |
| 1626810 at   | FBgn0030434             | 9.78  | 9.72  | 9.53  | 9.6   | 9.82  | 9.8   |
| 1628987 at   | ---                     | 8.86  | 8.8   | 8.97  | 8.99  | 8.96  | 8.87  |
| 1626112 at   | FBgn0011740             | 9.15  | 9.09  | 9.19  | 9.31  | 9.09  | 9.1   |
| 1640372 at   | FBgn0028693             | 11.59 | 11.53 | 11.56 | 12.04 | 11.59 | 11.26 |
| 1639585 a at | FBgn0019957             | 10.76 | 10.7  | 11.08 | 11.01 | 10.96 | 10.74 |
| 1638050 s at | FBgn0005612             | 7.36  | 7.3   | 7.86  | 7.11  | 6.88  | 7.23  |
| 1639526 a at | FBgn0024329             | 10.07 | 10.01 | 9.99  | 9.88  | 10.14 | 10.02 |
| 1629472 s at | FBgn0037688             | 8.53  | 8.47  | 8.4   | 8.58  | 8.56  | 8.53  |
| 1636002 at   | FBgn0025626             | 9.28  | 9.22  | 9.2   | 9.37  | 9.38  | 9.27  |
| 1629250 at   | FBgn0035720             | 11.38 | 11.32 | 11.19 | 11.28 | 11.28 | 11.32 |
| 1626762 s at | FBgn0000316             | 9.62  | 9.56  | 9.88  | 9.85  | 9.72  | 9.56  |

|              |                         |       |       |       |       |       |       |
|--------------|-------------------------|-------|-------|-------|-------|-------|-------|
| 1631359 s at | FBgn0028670             | 10.91 | 10.85 | 10.68 | 10.65 | 10.88 | 10.76 |
| 1624557 at   | FBgn0025832             | 9.37  | 9.31  | 9.41  | 9.7   | 9.45  | 9.27  |
| 1641435 at   | FBgn0033482             | 9.88  | 9.81  | 9.82  | 9.73  | 9.85  | 9.83  |
| 1629107 at   | FBgn0005593             | 13.75 | 13.69 | 13.86 | 13.86 | 13.85 | 13.74 |
| 1638789 at   | FBgn0020439             | 9.63  | 9.57  | 10.22 | 9.55  | 9.45  | 9.23  |
| 1638751 a at | FBgn0030418             | 7.6   | 7.54  | 7.52  | 7.88  | 7.48  | 7.45  |
| 1626688 at   | FBgn0030797             | 7.79  | 7.73  | 7.91  | 7.74  | 7.7   | 7.52  |
| 1633986 at   | FBgn0038815             | 7.5   | 7.43  | 7.89  | 8.09  | 7.79  | 7.88  |
| 1639354 at   | FBgn0037621             | 9.12  | 9.06  | 9.09  | 9.36  | 9.32  | 9.22  |
| 1635157 at   | FBgn0035889             | 9.38  | 9.32  | 9.11  | 9.14  | 9.2   | 9.39  |
| 1634817 at   | FBgn0003008             | 9.1   | 9.03  | 9.03  | 9.17  | 9.22  | 9.16  |
| 1635111 s at | FBgn0033117             | 8.8   | 8.74  | 8.94  | 8.95  | 9     | 8.89  |
| 1632594 at   | FBgn0033185             | 7.86  | 7.8   | 7.89  | 8.19  | 8.04  | 7.96  |
| 1635259 at   | FBgn0002787             | 10.76 | 10.7  | 10.81 | 10.88 | 10.83 | 10.65 |
| 1639678 at   | FBgn0039876             | 9.4   | 9.34  | 8.95  | 9.24  | 9.27  | 9.25  |
| 1634650 at   | FBgn0031213             | 10.36 | 10.29 | 10.3  | 10.39 | 10.18 | 10.12 |
| 1641336 at   | FBgn0032291 /// FBgn003 | 7.67  | 7.61  | 7.63  | 7.51  | 7.79  | 7.65  |
| 1625991 s at | FBgn0035422             | 13.35 | 13.29 | 13.56 | 13.54 | 13.44 | 13.33 |
| 1634101 at   | FBgn0029905             | 9.58  | 9.52  | 9.51  | 9.52  | 9.42  | 9.42  |
| 1634992 s at | FBgn0037636             | 11.81 | 11.75 | 11.74 | 11.69 | 11.73 | 11.66 |
| 1626170 at   | FBgn0033476             | 9.57  | 9.51  | 9.51  | 9.42  | 9.16  | 9.3   |
| 1628316 at   | FBgn0038608             | 10.07 | 10    | 10.06 | 10.14 | 10.3  | 10.29 |
| 1629156 at   | FBgn0052782             | 7.42  | 7.36  | 7.13  | 6.93  | 7.12  | 7.46  |
| 1633026 a at | FBgn0051158             | 9.68  | 9.61  | 9.5   | 9.33  | 9.52  | 9.64  |
| 1640608 at   | FBgn0023174             | 11.51 | 11.45 | 11.6  | 11.54 | 11.67 | 11.47 |
| 1640276 a at | FBgn0024754             | 9.51  | 9.45  | 9.45  | 9.41  | 9.24  | 9.27  |
| 1631568 a at | FBgn0003349             | 7.9   | 7.84  | 8.26  | 7.9   | 7.45  | 7.69  |
| 1623012 at   | ---                     | 9.47  | 9.4   | 9.69  | 9.52  | 9.43  | 9.4   |
| 1629475 at   | ---                     | 10.35 | 10.28 | 10.46 | 10.46 | 10.44 | 10.37 |
| 1630754 at   | FBgn0037110             | 9.29  | 9.22  | 9.2   | 9.31  | 9.49  | 9.38  |
| 1625646 at   | FBgn0039936             | 11.77 | 11.7  | 11.69 | 11.68 | 11.79 | 11.81 |
| 1639665 at   | FBgn0037549             | 9.16  | 9.1   | 9.47  | 9.18  | 9.25  | 9.21  |
| 1626818 at   | FBgn0032051             | 9.46  | 9.4   | 9.48  | 9.23  | 9.44  | 9.39  |
| 1630958 at   | FBgn0036805             | 9.03  | 8.97  | 9.07  | 8.97  | 9.04  | 8.92  |
| 1630342 s at | FBgn0038268             | 7.54  | 7.48  | 7.37  | 7.63  | 7.43  | 7.54  |
| 1627054 at   | FBgn0003016             | 9.28  | 9.22  | 9.32  | 9.15  | 9.38  | 9.43  |

|              |             |       |       |       |       |       |       |
|--------------|-------------|-------|-------|-------|-------|-------|-------|
| 1638886 at   | FBgn0037722 | 8.4   | 8.33  | 8.5   | 8.54  | 8.57  | 8.45  |
| 1629871 at   | FBgn0033028 | 9.87  | 9.8   | 9.95  | 9.85  | 9.86  | 9.81  |
| 1641247 at   | FBgn0031051 | 10.01 | 9.94  | 9.84  | 9.93  | 10.04 | 9.93  |
| 1641445 s at | FBgn0030894 | 9.35  | 9.28  | 9.07  | 9.26  | 9.37  | 9.15  |
| 1636999 a at | FBgn0043070 | 8.43  | 8.37  | 8.22  | 8.3   | 8.42  | 8.29  |
| 1639748 at   | ---         | 9.68  | 9.62  | 9.33  | 9.42  | 9.22  | 9.32  |
| 1626465 a at | FBgn0010303 | 8.3   | 8.24  | 8.21  | 8.23  | 8.31  | 8.22  |
| 1626209 a at | FBgn0029785 | 13.74 | 13.67 | 13.92 | 13.85 | 13.81 | 13.73 |
| 1633400 at   | ---         | 10.94 | 10.87 | 11.08 | 11.04 | 10.91 | 10.89 |
| 1637390 at   | FBgn0023545 | 10.23 | 10.16 | 10.16 | 10.48 | 10.3  | 10.03 |
| 1636941 at   | FBgn0036398 | 8.7   | 8.64  | 8.7   | 8.13  | 8.44  | 8.68  |
| 1624310 s at | FBgn0036622 | 9.77  | 9.7   | 9.79  | 9.73  | 9.88  | 9.8   |
| 1631055 at   | FBgn0000273 | 8.66  | 8.6   | 8.37  | 8.54  | 8.57  | 8.42  |
| 1629936 at   | FBgn0023519 | 9.99  | 9.92  | 10.01 | 9.91  | 9.97  | 9.97  |
| 1634433 at   | ---         | 12.17 | 12.11 | 12.1  | 12.32 | 12.38 | 12.13 |
| 1627806 at   | FBgn0037205 | 7.84  | 7.77  | 8.53  | 8.78  | 8.36  | 8.32  |
| 1628694 a at | FBgn0020238 | 12.98 | 12.92 | 13.05 | 13.04 | 12.98 | 12.98 |
| 1640466 s at | FBgn0033879 | 11.57 | 11.5  | 11.46 | 11.56 | 11.77 | 11.57 |
| 1627398 a at | FBgn0001105 | 11.47 | 11.4  | 11.49 | 11.44 | 11.54 | 11.49 |
| 1638854 s at | FBgn0036312 | 9.01  | 8.94  | 9.08  | 8.95  | 8.9   | 8.82  |
| 1638670 a at | FBgn0039450 | 9.66  | 9.6   | 9.66  | 9.66  | 9.73  | 9.56  |
| 1624983 s at | FBgn0010411 | 14    | 13.93 | 13.95 | 13.96 | 14.03 | 13.94 |
| 1635567 s at | FBgn0032794 | 10.91 | 10.85 | 10.78 | 10.7  | 11.04 | 11.09 |
| 1624792 at   | FBgn0030136 | 13.97 | 13.91 | 14.04 | 14.11 | 14.07 | 13.95 |
| 1624027 at   | ---         | 8.87  | 8.81  | 8.8   | 8.96  | 8.92  | 8.86  |
| AFFX-r2-P1-c | ---         | 14.27 | 14.2  | 14.15 | 14.33 | 14.19 | 14.1  |
| 1638937 at   | FBgn0014906 | 10.77 | 10.71 | 10.52 | 10.79 | 10.72 | 10.66 |
| 1634320 at   | ---         | 10.73 | 10.66 | 10.76 | 10.79 | 10.76 | 10.63 |
| 1627044 s at | FBgn0004551 | 10.03 | 9.96  | 10.14 | 10.08 | 10.03 | 9.93  |
| 1635608 at   | FBgn0016685 | 12.78 | 12.72 | 12.72 | 12.76 | 12.65 | 12.72 |
| 1626768 at   | FBgn0038854 | 7.41  | 7.34  | 7.65  | 8.01  | 7.65  | 7.4   |
| 1631807 at   | FBgn0037708 | 7.84  | 7.77  | 7.7   | 7.55  | 7.52  | 7.48  |
| 1638731 at   | FBgn0037911 | 8.67  | 8.6   | 8.45  | 8.66  | 8.74  | 8.6   |
| 1641305 at   | FBgn0004872 | 9.85  | 9.78  | 10.08 | 9.69  | 9.57  | 9.67  |
| 1641004 a at | FBgn0025683 | 10.21 | 10.14 | 10.21 | 9.89  | 9.59  | 9.81  |
| 1628717 a at | FBgn0002873 | 8.76  | 8.69  | 8.43  | 8.34  | 8.68  | 8.46  |

|              |                         |       |       |       |       |       |       |
|--------------|-------------------------|-------|-------|-------|-------|-------|-------|
| 1629690 at   | FBgn0037918             | 7.93  | 7.86  | 7.92  | 8.01  | 7.96  | 7.76  |
| 1640082 at   | FBgn0036801             | 9.95  | 9.88  | 9.81  | 9.73  | 9.83  | 10.01 |
| 1625824 at   | FBgn0037231             | 10.32 | 10.25 | 10.25 | 10.2  | 10.32 | 10.21 |
| 1641130 at   | FBgn0028539             | 8.95  | 8.88  | 8.89  | 8.94  | 8.85  | 8.82  |
| 1624330 s at | FBgn0032197             | 10.53 | 10.46 | 10.44 | 10.71 | 10.63 | 10.46 |
| 1628820 at   | FBgn0052521             | 7.26  | 7.19  | 6.8   | 6.68  | 7.1   | 7.08  |
| 1633964 at   | FBgn0029706             | 8.8   | 8.73  | 8.8   | 9.02  | 8.86  | 8.89  |
| 1640765 at   | FBgn0023094             | 10.32 | 10.25 | 9.91  | 10.19 | 10.32 | 10.18 |
| 1641017 at   | FBgn0024188             | 9.95  | 9.88  | 10.01 | 10.16 | 10.01 | 9.94  |
| 1633399 at   | FBgn0020129             | 7.9   | 7.83  | 8.04  | 7.76  | 7.97  | 7.74  |
| 1624284 a at | FBgn0032745             | 9.01  | 8.95  | 9.14  | 9.42  | 9.11  | 9.07  |
| 1631488 at   | FBgn0031077             | 7.26  | 7.2   | 7.29  | 7.02  | 6.95  | 7.01  |
| AFFX-r2-Bs-p | ---                     | 6.86  | 6.8   | 6.37  | 6.71  | 7.01  | 6.78  |
| 1622907 at   | ---                     | 8.29  | 8.22  | 8.38  | 8.3   | 8.31  | 8.11  |
| 1629287 at   | FBgn0036210             | 6.86  | 6.79  | 6.81  | 7.08  | 7.17  | 7.07  |
| 1625387 s at | FBgn0025615 /// FBgn001 | 8.45  | 8.38  | 8.84  | 8.43  | 8.31  | 8.48  |
| 1624337 at   | FBgn0004404             | 11.86 | 11.79 | 11.9  | 11.88 | 11.87 | 11.58 |
| 1627046 at   | FBgn0031145             | 9.73  | 9.66  | 9.99  | 10.01 | 9.73  | 9.74  |
| 1627739 at   | FBgn0040286             | 12.03 | 11.96 | 11.91 | 11.83 | 11.82 | 11.77 |
| 1623919 a at | FBgn0038476             | 12.51 | 12.44 | 12.54 | 12.68 | 12.55 | 12.44 |
| 1635461 at   | FBgn0034988             | 7.96  | 7.89  | 8.03  | 7.86  | 7.84  | 7.8   |
| 1629356 at   | FBgn0019938             | 9.89  | 9.82  | 10.12 | 9.64  | 9.88  | 9.9   |
| 1623189 at   | FBgn0035001             | 9.98  | 9.91  | 9.94  | 9.7   | 9.84  | 9.81  |
| 1635846 a at | FBgn0004882             | 11.16 | 11.09 | 11.16 | 10.99 | 10.97 | 11.23 |
| 1632026 at   | FBgn0028515             | 8.92  | 8.86  | 9.19  | 9.14  | 8.99  | 8.88  |
| 1635631 a at | FBgn0027505             | 7.69  | 7.62  | 7.8   | 7.92  | 7.65  | 7.52  |
| 1627488 at   | FBgn0038206             | 10.12 | 10.05 | 9.78  | 9.88  | 10.25 | 10.21 |
| 1631632 s at | FBgn0000182             | 12.55 | 12.48 | 12.28 | 12.37 | 12.3  | 12.3  |
| 1627942 at   | FBgn0038741             | 7.91  | 7.84  | 7.82  | 7.84  | 8.2   | 8.07  |
| 1630830 a at | FBgn0037723             | 8.51  | 8.44  | 8.31  | 8.25  | 8.28  | 8.21  |
| 1631598 at   | FBgn0029892             | 8.07  | 8     | 8.11  | 8.36  | 7.78  | 7.17  |
| 1631390 at   | FBgn0038876             | 8.28  | 8.21  | 7.93  | 7.95  | 8.16  | 8.21  |
| 1638691 at   | FBgn0052202             | 8.38  | 8.31  | 8.39  | 8.81  | 8.58  | 8.52  |
| 1634419 at   | FBgn0031312             | 9.86  | 9.79  | 9.45  | 9.77  | 9.67  | 9.77  |
| 1627209 at   | FBgn0030556             | 9.23  | 9.16  | 9.51  | 9.44  | 9.39  | 9.2   |
| 1616608 a at | FBgn0001128             | 10.5  | 10.43 | 10.34 | 10.57 | 10.81 | 10.64 |

|              |                         |       |       |       |       |       |       |
|--------------|-------------------------|-------|-------|-------|-------|-------|-------|
| 1629974 at   | FBgn0011836             | 8.28  | 8.21  | 8.37  | 8.46  | 8.39  | 8.13  |
| 1640366 at   | FBgn0038058 /// FBgn005 | 8.08  | 8.01  | 8.06  | 8.23  | 8.1   | 7.9   |
| 1634509 s at | FBgn0004373             | 8.9   | 8.83  | 9.04  | 8.76  | 8.89  | 8.83  |
| 1635205 at   | FBgn0037446             | 9.56  | 9.49  | 9.48  | 9.71  | 9.75  | 9.69  |
| 1623708 at   | FBgn0039672             | 9.07  | 9     | 9.51  | 9.5   | 9.16  | 9     |
| 1628214 at   | FBgn0017429             | 9.35  | 9.28  | 9.56  | 9.37  | 9.45  | 9.38  |
| 1628129 a at | FBgn0052823 /// FBgn002 | 9.48  | 9.41  | 9.53  | 9.64  | 9.61  | 9.37  |
| 1634804 at   | FBgn0031919             | 7.49  | 7.42  | 7.71  | 7.35  | 7.28  | 7.55  |
| 1631318 at   | ---                     | 9.86  | 9.79  | 10.14 | 10.02 | 10.02 | 9.82  |
| 1636379 a at | FBgn0020129             | 7.1   | 7.03  | 7.31  | 6.94  | 7.1   | 6.93  |
| 1623584 at   | FBgn0032745             | 9.65  | 9.58  | 9.66  | 9.65  | 9.51  | 9.45  |
| 1635267 s at | FBgn0035936             | 9.61  | 9.54  | 9.05  | 9.5   | 9.23  | 9.38  |
| 1628928 s at | FBgn0025286             | 13.76 | 13.69 | 13.91 | 13.88 | 13.86 | 13.76 |
| 1641160 s at | FBgn0037262             | 9.13  | 9.06  | 9.05  | 9.24  | 9.12  | 9.07  |
| 1630157 a at | FBgn0030991             | 10.87 | 10.8  | 10.79 | 10.63 | 10.77 | 10.86 |
| 1627623 s at | FBgn0000181             | 7.17  | 7.1   | 7.2   | 6.76  | 7.15  | 7.11  |
| 1623516 s at | ---                     | 9.33  | 9.26  | 8.96  | 9.07  | 9.15  | 9.1   |
| 1636433 at   | FBgn0030000             | 7.21  | 7.14  | 7.47  | 7.49  | 7.41  | 7.09  |
| 1636896 a at | FBgn0031190             | 9.62  | 9.55  | 9.4   | 9.45  | 9.59  | 9.42  |
| 1637085 at   | FBgn0013762             | 9.04  | 8.97  | 9.05  | 9.52  | 9.22  | 9.09  |
| 1628563 at   | FBgn0053181             | 9.27  | 9.2   | 9.08  | 9.1   | 9.06  | 9.16  |
| 1636541 at   | FBgn0042641             | 9.08  | 9.01  | 9.13  | 9.27  | 9.27  | 9.18  |
| 1633765 at   | ---                     | 9.12  | 9.05  | 9.6   | 9.09  | 8.89  | 8.7   |
| 1624986 at   | FBgn0037637             | 9.52  | 9.45  | 9.69  | 9.57  | 9.57  | 9.44  |
| 1626980 at   | FBgn0025574             | 8.37  | 8.3   | 8.22  | 8.26  | 8.49  | 8.62  |
| 1624079 a at | FBgn0039966             | 8.82  | 8.75  | 8.61  | 8.81  | 8.92  | 8.85  |
| 1640602 s at | FBgn0042693             | 9.61  | 9.54  | 9.75  | 9.68  | 9.58  | 9.45  |
| 1628389 at   | FBgn0038376             | 8.68  | 8.61  | 8.66  | 8.71  | 8.61  | 8.37  |
| 1624252 s at | FBgn0037811 /// FBgn003 | 10.57 | 10.5  | 10.65 | 10.67 | 10.57 | 10.38 |
| 1636598 s at | FBgn0040395             | 9.02  | 8.95  | 8.91  | 9.05  | 9.09  | 8.89  |
| 1637558 at   | FBgn0033755             | 8.76  | 8.69  | 8.96  | 8.76  | 8.76  | 8.66  |
| 1628486 a at | FBgn0033015             | 10.65 | 10.58 | 10.52 | 10.63 | 10.82 | 10.7  |
| 1636831 s at | FBgn0000212             | 10.31 | 10.24 | 10.29 | 10.27 | 10.4  | 10.27 |
| 1640877 at   | FBgn0031321             | 8.74  | 8.67  | 8.54  | 8.85  | 8.9   | 8.8   |
| 1626228 a at | FBgn0034187             | 9.93  | 9.86  | 9.43  | 9.64  | 9.68  | 9.87  |
| 1632277 a at | FBgn0026428             | 8.94  | 8.86  | 8.82  | 8.86  | 8.85  | 8.64  |



|              |             |       |       |       |       |       |       |
|--------------|-------------|-------|-------|-------|-------|-------|-------|
| 1624564 s at | FBgn0004403 | 13.73 | 13.66 | 13.66 | 13.75 | 13.74 | 13.63 |
| 1639507 at   | FBgn0037873 | 10.67 | 10.6  | 10.65 | 10.31 | 10.52 | 10.6  |
| 1637881 at   | FBgn0032704 | 10.44 | 10.37 | 10.33 | 10.37 | 10.46 | 10.36 |
| 1625931 at   | FBgn0040230 | 8.51  | 8.44  | 8.42  | 8.28  | 8.55  | 8.68  |
| 1641126 at   | FBgn0030364 | 10.31 | 10.24 | 10.59 | 10.52 | 10.55 | 10.48 |
| 1629055 a at | FBgn0031380 | 12.32 | 12.25 | 12.29 | 12.41 | 12.38 | 12.21 |
| 1624474 at   | FBgn0038388 | 10.33 | 10.26 | 9.97  | 10.08 | 10.2  | 10.09 |
| 1629606 at   | FBgn0035169 | 9.92  | 9.85  | 9.77  | 9.88  | 9.95  | 9.85  |
| 1633261 a at | FBgn0031764 | 8.65  | 8.58  | 8.95  | 8.79  | 8.77  | 8.7   |
| 1628976 at   | FBgn0031043 | 10.05 | 9.97  | 9.98  | 9.75  | 10.01 | 10.1  |
| 1625692 s at | FBgn0034649 | 9.27  | 9.19  | 9.25  | 9     | 9.11  | 8.95  |
| 1639092 at   | FBgn0039489 | 8.51  | 8.43  | 8.28  | 8.62  | 8.61  | 8.6   |
| 1631907 at   | FBgn0036198 | 9.39  | 9.31  | 9.22  | 9.28  | 9.33  | 9.32  |
| 1627723 at   | FBgn0037883 | 7.65  | 7.58  | 8.24  | 8.12  | 8.01  | 7.93  |
| 1639992 at   | FBgn0038270 | 8.71  | 8.64  | 8.58  | 8.95  | 8.75  | 8.62  |
| 1626808 s at | FBgn0014020 | 10.9  | 10.83 | 11.17 | 11.09 | 11.08 | 11.03 |
| 1637727 at   | FBgn0035102 | 8.38  | 8.3   | 8.24  | 8.36  | 8.4   | 8.21  |
| 1633381 at   | FBgn0030096 | 8.85  | 8.77  | 8.93  | 8.98  | 8.84  | 8.71  |
| 1632343 at   | FBgn0020764 | 9.65  | 9.58  | 9.81  | 9.6   | 9.59  | 9.46  |
| 1641673 at   | FBgn0027495 | 7.84  | 7.77  | 7.41  | 7.72  | 7.88  | 7.8   |
| AFFX-Dros-e  | FBgn0001942 | 13.05 | 12.98 | 13.13 | 13.11 | 13.07 | 12.99 |
| 1631973 at   | FBgn0003022 | 10.6  | 10.52 | 10.56 | 10.68 | 10.87 | 10.63 |
| 1623926 at   | FBgn0031242 | 10.26 | 10.19 | 10.24 | 10.01 | 10.11 | 10.19 |
| 1638412 at   | ---         | 8.19  | 8.12  | 8.16  | 8     | 8.22  | 8.09  |
| 1638070 at   | ---         | 9.56  | 9.49  | 9.65  | 9.4   | 9.52  | 9.5   |
| 1634362 a at | ---         | 11.12 | 11.05 | 10.92 | 10.71 | 10.9  | 10.99 |
| 1628603 at   | FBgn0036825 | 13.69 | 13.61 | 13.82 | 13.81 | 13.81 | 13.68 |
| 1627465 at   | FBgn0034726 | 9.21  | 9.13  | 9.35  | 9.46  | 9.53  | 9.38  |
| 1632962 at   | FBgn0031980 | 13.7  | 13.62 | 13.84 | 13.87 | 13.8  | 13.73 |
| 1634133 at   | FBgn0036920 | 9.59  | 9.52  | 9.57  | 9.71  | 9.67  | 9.57  |
| 1640527 at   | ---         | 10.75 | 10.68 | 10.81 | 10.73 | 10.61 | 10.62 |
| 1636837 at   | FBgn0052179 | 9.22  | 9.15  | 9.24  | 9.02  | 9.23  | 9.25  |
| 1635248 at   | FBgn0036267 | 8.57  | 8.49  | 8.29  | 8.47  | 8.17  | 8.37  |
| 1627983 at   | FBgn0002506 | 10.07 | 10    | 10.45 | 10.6  | 10.26 | 10.06 |
| 1624165 a at | FBgn0019947 | 9.32  | 9.24  | 9     | 8.96  | 9.21  | 9.26  |
| 1627634 at   | FBgn0034398 | 11.51 | 11.44 | 11.48 | 11.6  | 11.72 | 11.59 |

|              |             |       |       |       |       |       |       |
|--------------|-------------|-------|-------|-------|-------|-------|-------|
| 1624504 s at | FBgn0027786 | 10.36 | 10.29 | 10.38 | 10.32 | 10.5  | 10.39 |
| 1638871 at   | ---         | 10.78 | 10.7  | 10.52 | 10.59 | 10.55 | 10.59 |
| 1632158 a at | FBgn0039066 | 9.11  | 9.04  | 8.84  | 9.05  | 9     | 8.94  |
| 1640051 s at | FBgn0000258 | 12.5  | 12.43 | 12.53 | 12.54 | 12.53 | 12.52 |
| 1632763 at   | FBgn0033974 | 9.43  | 9.36  | 9.52  | 9.62  | 9.63  | 9.47  |
| 1634281 at   | FBgn0033556 | 9.28  | 9.2   | 9.47  | 9.67  | 9.54  | 9.41  |
| 1628547 at   | FBgn0038038 | 8.69  | 8.61  | 8.6   | 8.7   | 8.38  | 8.3   |
| 1641502 a at | FBgn0037063 | 9.35  | 9.27  | 8.89  | 9.22  | 9.31  | 9.24  |
| 1632438 at   | FBgn0037372 | 9.36  | 9.28  | 9.17  | 9.59  | 9.21  | 9.11  |
| 1634530 at   | FBgn0036608 | 7.48  | 7.4   | 7.16  | 7.29  | 7.29  | 7.17  |
| 1639544 at   | FBgn0031008 | 9.97  | 9.89  | 10.18 | 10    | 10.27 | 10.07 |
| 1630717 s at | FBgn0000289 | 9.87  | 9.8   | 9.81  | 9.7   | 9.94  | 9.98  |
| 1635527 at   | ---         | 8.18  | 8.1   | 8.21  | 7.91  | 8.02  | 8.01  |
| 1629373 at   | FBgn0036994 | 9.49  | 9.42  | 8.98  | 9.24  | 9.49  | 9.42  |
| 1637015 s at | FBgn0020255 | 12.21 | 12.13 | 12.21 | 12.31 | 12.17 | 12.02 |
| 1641332 at   | FBgn0037074 | 7.18  | 7.1   | 7.02  | 6.99  | 7.22  | 7.16  |
| 1634823 at   | FBgn0030572 | 9.43  | 9.35  | 9.66  | 9.68  | 9.42  | 9.35  |
| 1639692 s at | FBgn0000462 | 9.47  | 9.4   | 9.59  | 9.8   | 9.56  | 9.44  |
| 1635745 a at | FBgn0028479 | 10.97 | 10.9  | 11.16 | 11.26 | 11.09 | 10.75 |
| 1635903 at   | FBgn0014006 | 9.42  | 9.34  | 9.28  | 9.31  | 9.35  | 9.28  |
| 1637623 at   | ---         | 10.75 | 10.67 | 10.59 | 10.61 | 10.3  | 10.38 |
| 1639551 at   | FBgn0026262 | 10.63 | 10.55 | 10.35 | 10.28 | 10.41 | 10.46 |
| AFFX-Dros-A  | FBgn0000043 | 9.91  | 9.84  | 9.68  | 9.1   | 9.81  | 9.68  |
| 1627433 at   | FBgn0034961 | 8.91  | 8.83  | 8.93  | 9.08  | 9.07  | 8.94  |
| 1624318 at   | FBgn0010339 | 10.66 | 10.58 | 10.77 | 10.61 | 10.81 | 10.76 |
| 1639968 at   | FBgn0033972 | 9.28  | 9.2   | 9.14  | 9.24  | 9.23  | 9.07  |
| 1639607 at   | FBgn0037674 | 8.31  | 8.24  | 8.38  | 8.33  | 8.35  | 8.25  |
| 1635981 a at | FBgn0037245 | 12.75 | 12.68 | 12.66 | 12.81 | 12.6  | 12.6  |
| 1625650 at   | FBgn0037313 | 10.22 | 10.14 | 10.15 | 10.27 | 10.39 | 10.22 |
| 1632632 at   | FBgn0028535 | 9.53  | 9.45  | 9.3   | 9.8   | 9.42  | 9.18  |
| 1630417 at   | FBgn0010905 | 8.42  | 8.34  | 8.3   | 8.37  | 8.43  | 8.43  |
| 1637771 s at | FBgn0033544 | 9.59  | 9.51  | 9.4   | 9.27  | 9.52  | 9.52  |
| 1627423 at   | FBgn0039156 | 9.43  | 9.35  | 9.36  | 9.62  | 9.35  | 9.15  |
| 1639257 s at | FBgn0037239 | 9.41  | 9.33  | 9.3   | 9.29  | 9.23  | 9.21  |
| 1628041 a at | ---         | 11.73 | 11.65 | 11.81 | 11.88 | 11.85 | 11.75 |
| 1624775 at   | FBgn0032818 | 8.78  | 8.7   | 8.71  | 8.55  | 8.75  | 8.64  |

|              |                         |       |       |       |       |       |       |
|--------------|-------------------------|-------|-------|-------|-------|-------|-------|
| 1628481 at   | FBgn0037566             | 9.65  | 9.57  | 9.93  | 10.03 | 9.85  | 9.73  |
| 1632458 at   | FBgn0033156             | 9.85  | 9.77  | 9.78  | 10.1  | 10.03 | 9.8   |
| 1637911 at   | FBgn0030122             | 9.74  | 9.67  | 9.58  | 9.84  | 9.56  | 9.34  |
| 1633650 at   | FBgn0038951             | 7.82  | 7.74  | 7.78  | 7.6   | 7.76  | 7.66  |
| 1632710 s at | FBgn0038738             | 10.55 | 10.48 | 10.56 | 10.66 | 10.49 | 10.43 |
| 1640069 at   | FBgn0034232             | 10.35 | 10.27 | 10.35 | 10.41 | 10.21 | 10.18 |
| 1640227 at   | FBgn0028473             | 11.42 | 11.35 | 11.56 | 11.44 | 11.7  | 11.37 |
| 1636140 at   | FBgn0031598             | 7.68  | 7.6   | 7.43  | 7.73  | 7.72  | 7.62  |
| 1639914 at   | FBgn0038056             | 9.24  | 9.17  | 9.1   | 8.91  | 9.29  | 9.11  |
| 1628175 at   | FBgn0037814             | 9.86  | 9.78  | 9.67  | 9.87  | 9.78  | 9.83  |
| 1632413 at   | FBgn0032248             | 9.29  | 9.21  | 9.3   | 9.41  | 9.38  | 9.3   |
| 1631546 at   | FBgn0034791             | 9.88  | 9.8   | 10    | 9.96  | 9.96  | 9.79  |
| 1640146 at   | ---                     | 9.74  | 9.66  | 9.66  | 9.56  | 9.78  | 9.81  |
| 1630981 at   | FBgn0037536             | 10.14 | 10.06 | 9.86  | 9.84  | 10.14 | 10.1  |
| 1636510 a at | FBgn0039114             | 7.32  | 7.24  | 7.63  | 7.22  | 7.55  | 6.99  |
| 1641511 at   | ---                     | 10.06 | 9.98  | 9.91  | 9.85  | 9.98  | 9.93  |
| 1634294 s at | FBgn0030089             | 8.44  | 8.36  | 8.15  | 8.19  | 8.48  | 8.31  |
| 1636273 at   | FBgn0033083             | 8.97  | 8.89  | 8.96  | 9.02  | 9.06  | 9.02  |
| 1624041 at   | FBgn0033260             | 9.99  | 9.91  | 9.9   | 9.97  | 9.95  | 9.87  |
| 1636327 at   | FBgn0051852             | 8.99  | 8.91  | 9.08  | 9.17  | 9.18  | 8.94  |
| 1631374 at   | FBgn0024248             | 8.4   | 8.32  | 8.52  | 8.56  | 8.44  | 8.3   |
| 1636346 at   | FBgn0036124             | 9.2   | 9.12  | 9.34  | 9.15  | 9.14  | 9.13  |
| 1632586 at   | FBgn0036671             | 8.98  | 8.91  | 8.9   | 9     | 8.99  | 8.92  |
| AFFX-r2-Dro  | FBgn0001128             | 11.28 | 11.2  | 11.03 | 11.36 | 11.55 | 11.28 |
| 1624191 at   | ---                     | 9.16  | 9.08  | 8.67  | 8.8   | 9.12  | 9.18  |
| 1624019 s at | FBgn0002579             | 14.09 | 14.01 | 13.98 | 13.99 | 14.04 | 13.93 |
| 1634036 at   | ---                     | 10.11 | 10.03 | 9.69  | 9.99  | 10    | 9.82  |
| 1635120 at   | FBgn0034089             | 9.65  | 9.57  | 10.1  | 9.76  | 9.54  | 9.5   |
| 1641150 at   | FBgn0027936             | 10.93 | 10.85 | 10.78 | 10.78 | 10.81 | 10.76 |
| 1633505 at   | FBgn0039541             | 9.25  | 9.17  | 9.1   | 9.29  | 9.27  | 8.89  |
| 1637024 at   | FBgn0028662             | 11.45 | 11.37 | 11.27 | 11.32 | 11.45 | 11.42 |
| 1641092 at   | FBgn0035960             | 7.21  | 7.13  | 7.36  | 7.38  | 7.47  | 7.22  |
| 1626006 at   | FBgn0010269             | 9.91  | 9.83  | 9.63  | 9.55  | 9.89  | 9.82  |
| 1641244 at   | FBgn0011297 /// FBgn001 | 8.52  | 8.44  | 8.49  | 8.54  | 8.43  | 8.34  |
| 1633830 at   | FBgn0032787             | 8.33  | 8.25  | 8.16  | 8.19  | 8.14  | 8.07  |
| 1630943 at   | FBgn0036718             | 7.83  | 7.75  | 7.95  | 8.03  | 7.93  | 7.71  |

|              |                         |       |       |       |       |       |       |
|--------------|-------------------------|-------|-------|-------|-------|-------|-------|
| 1639255 s at | FBgn0027580             | 11.32 | 11.24 | 11.38 | 11.35 | 11.22 | 11.06 |
| 1629984 s at | ---                     | 14.33 | 14.25 | 13.99 | 14.08 | 14.24 | 14.15 |
| 1629648 s at | ---                     | 7.93  | 7.85  | 7.82  | 7.64  | 7.75  | 7.78  |
| 1628562 s at | FBgn0002781             | 9.19  | 9.11  | 9.08  | 9.09  | 9.17  | 9.08  |
| 1637317 at   | ---                     | 10.58 | 10.5  | 10.39 | 10.62 | 10.77 | 10.62 |
| 1641449 at   | FBgn0034246             | 8.89  | 8.81  | 9.19  | 8.96  | 8.87  | 8.96  |
| 1636551 at   | FBgn0037822 /// FBgn002 | 9.52  | 9.44  | 9.67  | 9.56  | 9.44  | 9.42  |
| 1625595 a at | FBgn0030670             | 8.94  | 8.86  | 8.68  | 8.58  | 8.99  | 8.94  |
| 1633905 at   | FBgn0035422             | 8.02  | 7.94  | 8.23  | 6.6   | 7.26  | 7.77  |
| 1634625 at   | FBgn0027453             | 9.41  | 9.33  | 9.1   | 9.16  | 9.35  | 9.28  |
| 1628922 s at | FBgn0015562             | 9.03  | 8.95  | 8.59  | 8.61  | 9.14  | 9.06  |
| 1636693 at   | FBgn0030452             | 7.3   | 7.22  | 7.16  | 7.05  | 7.61  | 7.31  |
| 1635740 at   | FBgn0015737             | 9.9   | 9.82  | 9.88  | 9.64  | 9.87  | 9.81  |
| 1626261 s at | FBgn0033393             | 11.35 | 11.27 | 11.24 | 11.1  | 11.33 | 11.25 |
| 1632395 s at | FBgn0028671             | 9.35  | 9.27  | 9.32  | 9.42  | 9.39  | 9.18  |
| 1641624 at   | FBgn0051957             | 9.4   | 9.32  | 9.56  | 9.61  | 9.49  | 9.53  |
| 1636499 at   | FBgn0039144             | 8.57  | 8.49  | 8.4   | 8.61  | 8.69  | 8.51  |
| 1641548 at   | FBgn0035688             | 8.64  | 8.55  | 8.9   | 8.86  | 8.65  | 8.57  |
| 1629552 at   | FBgn0027872             | 9.6   | 9.52  | 9.33  | 9.36  | 9.64  | 9.63  |
| 1623090 at   | ---                     | 8     | 7.92  | 8.1   | 8.38  | 8.28  | 8.11  |
| 1623858 at   | FBgn0027785             | 10.58 | 10.5  | 10.77 | 10.72 | 10.69 | 10.49 |
| 1632707 at   | ---                     | 7.59  | 7.51  | 7.79  | 7.84  | 7.55  | 7.45  |
| 1635755 a at | FBgn0036373             | 7.69  | 7.61  | 7.6   | 7.73  | 7.82  | 7.55  |
| 1640281 s at | FBgn0035151             | 8.24  | 8.16  | 8.02  | 8.39  | 8.5   | 8.53  |
| 1636196 s at | FBgn0030955 /// FBgn003 | 9.12  | 9.03  | 9.63  | 9.05  | 8.95  | 9.15  |
| 1630946 at   | FBgn0004145             | 11.96 | 11.88 | 12.46 | 11.92 | 11.75 | 11.92 |
| 1635363 a at | FBgn0032979 /// FBgn005 | 11.75 | 11.66 | 11.56 | 11.59 | 11.65 | 11.59 |
| 1634898 a at | FBgn0027950             | 9.13  | 9.04  | 8.93  | 9.19  | 9.27  | 9.17  |
| 1625566 a at | FBgn0032516             | 9.3   | 9.22  | 9.05  | 9.38  | 9.57  | 9.39  |
| 1635907 at   | FBgn0037135             | 11.41 | 11.33 | 11.67 | 11.56 | 11.56 | 11.21 |
| 1630639 at   | FBgn0039528             | 8.62  | 8.54  | 8.79  | 8.44  | 8.28  | 8.5   |
| 1623588 at   | FBgn0024556             | 10.55 | 10.47 | 10.78 | 10.72 | 10.63 | 10.46 |
| 1630373 at   | FBgn0028897             | 7.9   | 7.82  | 7.62  | 7.93  | 8.06  | 7.87  |
| 1627461 at   | FBgn0032679             | 9.22  | 9.14  | 9.88  | 9.5   | 9.35  | 9.21  |
| 1637716 a at | FBgn0003498             | 11.5  | 11.42 | 11.5  | 11.61 | 11.35 | 11.46 |
| 1631585 a at | FBgn0033471             | 9.16  | 9.08  | 9.21  | 9.09  | 9.08  | 9.06  |

|              |             |       |       |       |       |       |       |
|--------------|-------------|-------|-------|-------|-------|-------|-------|
| 1640351 s at | FBgn0038771 | 10.3  | 10.22 | 10.39 | 10.49 | 10.45 | 10.28 |
| 1640454 at   | FBgn0027493 | 11.06 | 10.98 | 11.14 | 11.04 | 11.13 | 10.95 |
| 1624132 at   | FBgn0035980 | 8.32  | 8.23  | 8.67  | 8.87  | 8.26  | 8.26  |
| 1637448 s at | ---         | 13.73 | 13.64 | 13.82 | 13.78 | 13.82 | 13.71 |
| 1630672 at   | FBgn0013432 | 9.52  | 9.43  | 9.67  | 9.37  | 9.58  | 9.51  |
| 1633312 at   | FBgn0037958 | 8.99  | 8.91  | 8.88  | 9.12  | 9.14  | 8.97  |
| 1639403 s at | FBgn0029891 | 9.05  | 8.96  | 9.06  | 9.1   | 8.94  | 8.85  |
| 1623724 at   | ---         | 8.46  | 8.38  | 8.97  | 8.73  | 8.38  | 8.34  |
| 1634757 a at | FBgn0014184 | 12.39 | 12.31 | 12.45 | 12.35 | 12.45 | 12.46 |
| 1640925 at   | FBgn0034360 | 7.68  | 7.59  | 7.63  | 7.81  | 7.85  | 7.7   |
| 1635528 s at | FBgn0031035 | 13.67 | 13.59 | 13.79 | 13.75 | 13.82 | 13.65 |
| 1623324 at   | FBgn0002552 | 9.15  | 9.06  | 8.94  | 9.25  | 9.22  | 9.18  |
| 1637815 s at | FBgn0044323 | 9.52  | 9.43  | 9.58  | 9.42  | 9.6   | 9.41  |
| 1626805 s at | FBgn0011253 | 10.01 | 9.93  | 10.13 | 10.13 | 10.05 | 10.03 |
| 1635670 at   | FBgn0031244 | 9.04  | 8.95  | 8.84  | 8.7   | 8.93  | 8.8   |
| 1628686 a at | FBgn0003559 | 7.51  | 7.42  | 7.65  | 7.49  | 7.43  | 7.35  |
| 1638224 at   | ---         | 9     | 8.92  | 8.55  | 9.04  | 8.82  | 8.73  |
| 1628775 s at | FBgn0024939 | 14.2  | 14.11 | 14.07 | 14.03 | 14.17 | 14.07 |
| 1637564 a at | FBgn0038950 | 9.26  | 9.18  | 8.66  | 8.99  | 9.1   | 8.99  |
| 1626156 at   | FBgn0032761 | 8.42  | 8.34  | 8.11  | 8.31  | 8.4   | 8.26  |
| 1630270 s at | FBgn0020910 | 13.62 | 13.53 | 13.66 | 13.62 | 13.65 | 13.59 |
| 1637610 at   | ---         | 10.39 | 10.3  | 10.21 | 10.63 | 10.55 | 10.42 |
| 1632526 s at | ---         | 9.57  | 9.48  | 9.58  | 9.6   | 9.63  | 9.59  |
| 1625147 at   | FBgn0039725 | 9.17  | 9.09  | 8.79  | 8.91  | 9.21  | 9.22  |
| 1628915 s at | FBgn0027593 | 7.49  | 7.4   | 7.79  | 7.14  | 7.51  | 7.61  |
| 1629950 at   | FBgn0030061 | 8.96  | 8.88  | 8.98  | 8.86  | 9.07  | 8.91  |
| 1640237 a at | FBgn0001978 | 10.32 | 10.23 | 10.34 | 10.15 | 10.4  | 10.29 |
| 1632410 at   | FBgn0035372 | 8.82  | 8.73  | 8.59  | 8.57  | 8.84  | 8.73  |
| 1635469 at   | FBgn0037560 | 6.62  | 6.53  | 7.02  | 7.13  | 7.2   | 6.96  |
| 1627713 at   | FBgn0030854 | 10.6  | 10.52 | 10.5  | 10.55 | 10.63 | 10.56 |
| 1634442 at   | FBgn0003444 | 10.12 | 10.03 | 9.64  | 9.75  | 9.78  | 9.87  |
| 1641378 at   | FBgn0028579 | 8.9   | 8.82  | 8.72  | 8.85  | 8.81  | 8.71  |
| 1630695 at   | FBgn0039909 | 10.47 | 10.38 | 10.72 | 10.49 | 10.31 | 10.41 |
| 1628080 at   | FBgn0030013 | 9.7   | 9.62  | 9.62  | 9.76  | 9.85  | 9.72  |
| 1640174 at   | FBgn0025582 | 11.54 | 11.46 | 11.69 | 11.68 | 11.75 | 11.49 |
| 1635219 at   | FBgn0039538 | 8.38  | 8.3   | 8.17  | 8.24  | 8.48  | 8.33  |

|              |                         |       |       |       |       |       |       |
|--------------|-------------------------|-------|-------|-------|-------|-------|-------|
| 1640430 s at | ---                     | 10.23 | 10.15 | 10.29 | 10.39 | 10.47 | 10.29 |
| 1635479 a at | FBgn0052056             | 9.14  | 9.05  | 8.69  | 8.93  | 9.36  | 9.13  |
| 1631434 at   | ---                     | 10.89 | 10.8  | 10.9  | 11.14 | 10.88 | 10.81 |
| 1629715 at   | FBgn0037551             | 9.23  | 9.14  | 9.17  | 9     | 9.43  | 9.33  |
| 1637825 at   | FBgn0033178             | 8.46  | 8.38  | 8.39  | 8.3   | 8.33  | 8.23  |
| 1628216 at   | ---                     | 9.58  | 9.49  | 9.8   | 9.6   | 9.59  | 9.58  |
| 1626366 at   | FBgn0027945             | 9.62  | 9.53  | 9.79  | 9.74  | 9.87  | 9.73  |
| 1627399 at   | FBgn0033089             | 9.17  | 9.08  | 9.1   | 9.15  | 9.1   | 9.01  |
| 1627402 a at | ---                     | 12.01 | 11.93 | 12.03 | 12.03 | 12.07 | 11.96 |
| 1636527 at   | ---                     | 8.12  | 8.03  | 7.53  | 7.56  | 8.14  | 7.97  |
| 1633036 s at | FBgn0052495 /// FBgn003 | 8.9   | 8.82  | 9.01  | 8.81  | 8.61  | 8.61  |
| 1629077 s at | FBgn0037443             | 10.29 | 10.2  | 10.12 | 9.83  | 10.19 | 10.04 |
| 1630396 at   | FBgn0038787             | 9.5   | 9.42  | 9.62  | 9.56  | 9.45  | 9.38  |
| 1637819 at   | FBgn0032341             | 8.15  | 8.07  | 8.1   | 7.95  | 8.1   | 8.03  |
| 1630813 at   | ---                     | 14.06 | 13.98 | 14.02 | 14.06 | 14.11 | 14    |
| 1640169 s at | FBgn0001215             | 11.95 | 11.86 | 12.04 | 11.83 | 12.1  | 12.04 |
| 1627605 at   | FBgn0024371             | 10.66 | 10.57 | 10.32 | 10.68 | 10.81 | 10.82 |
| 1637118 at   | ---                     | 7.79  | 7.7   | 7.89  | 7.85  | 7.8   | 7.73  |
| 1631738 at   | FBgn0032499             | 8.18  | 8.09  | 8.25  | 8.45  | 8.14  | 8.07  |
| 1636380 at   | FBgn0024245             | 8.21  | 8.13  | 8.32  | 8.53  | 8.45  | 8.08  |
| 1627711 at   | FBgn0010350             | 9.69  | 9.6   | 9.42  | 9.33  | 9.51  | 9.49  |
| 1638516 s at | FBgn0032196             | 10.6  | 10.51 | 10.53 | 11.28 | 10.9  | 10.62 |
| 1637773 s at | FBgn0036650             | 9.38  | 9.29  | 9.3   | 9.24  | 8.96  | 9.2   |
| 1632396 at   | FBgn0033528             | 9.6   | 9.51  | 9.5   | 9.58  | 9.75  | 9.56  |
| 1640637 at   | FBgn0036761             | 9.42  | 9.34  | 9.19  | 9.5   | 9.56  | 9.49  |
| 1630093 at   | ---                     | 13.89 | 13.8  | 13.99 | 13.95 | 13.93 | 13.81 |
| 1629644 s at | FBgn0039532             | 9.54  | 9.45  | 9.28  | 9.26  | 9.68  | 9.48  |
| 1637531 at   | FBgn0030038             | 10.59 | 10.5  | 10.16 | 10.16 | 10.53 | 10.26 |
| 1623626 a at | FBgn0024362             | 9.58  | 9.49  | 9.46  | 9.36  | 9.45  | 9.51  |
| 1632954 at   | ---                     | 8.69  | 8.6   | 8.45  | 8.64  | 8.67  | 8.53  |
| 1625942 s at | FBgn0011202             | 9.3   | 9.21  | 9     | 8.98  | 9.33  | 9.37  |
| 1632700 a at | FBgn0033905             | 7.4   | 7.31  | 7.25  | 6.38  | 7.35  | 7.28  |
| 1624665 at   | FBgn0032916             | 9.4   | 9.31  | 9.12  | 8.95  | 9.55  | 9.52  |
| 1631724 s at | FBgn0035425             | 10.79 | 10.7  | 10.65 | 10.72 | 10.66 | 10.55 |
| 1624484 a at | FBgn0015602             | 10.37 | 10.28 | 10.3  | 10.37 | 10.5  | 10.44 |
| 1622937 at   | FBgn0036773             | 8.36  | 8.27  | 8.23  | 8.08  | 8.24  | 8.3   |

|              |                         |       |       |       |       |       |       |
|--------------|-------------------------|-------|-------|-------|-------|-------|-------|
| 1625758 s at | FBgn0025140             | 10.2  | 10.11 | 10.23 | 9.95  | 10.11 | 10.05 |
| 1628774 a at | ---                     | 8.81  | 8.72  | 8.49  | 8.69  | 8.97  | 8.86  |
| 1629692 at   | FBgn0034578             | 7.94  | 7.85  | 7.87  | 8.05  | 7.84  | 7.88  |
| 1634386 s at | FBgn0016701             | 10.13 | 10.04 | 10.08 | 10.07 | 10.17 | 10.12 |
| 1633153 at   | FBgn0031952             | 7.24  | 7.15  | 7.46  | 7.5   | 7.25  | 7.12  |
| 1628101 s at | FBgn0030693             | 10.09 | 10    | 10.09 | 10.16 | 10.37 | 10.25 |
| 1635103 at   | FBgn0023518             | 8.88  | 8.79  | 8.58  | 8.5   | 8.79  | 8.77  |
| 1634298 at   | FBgn0031987             | 9.33  | 9.24  | 9.26  | 9.76  | 9.31  | 9.25  |
| 1641721 a at | FBgn0039406             | 12.17 | 12.08 | 12.37 | 12.26 | 12.36 | 12.14 |
| 1630316 a at | FBgn0023515             | 10.62 | 10.53 | 10.33 | 10.51 | 10.7  | 10.64 |
| 1623150 at   | FBgn0003274             | 14.36 | 14.26 | 14.17 | 14.24 | 14.34 | 14.16 |
| 1623997 s at | FBgn0038834             | 13.54 | 13.45 | 13.67 | 13.59 | 13.61 | 13.47 |
| 1640695 at   | FBgn0039304             | 9.02  | 8.93  | 8.9   | 9.02  | 9.05  | 9.15  |
| 1633767 at   | FBgn0037701             | 11.16 | 11.07 | 11.16 | 11.09 | 11.07 | 10.93 |
| 1641598 at   | FBgn0041087             | 10.19 | 10.1  | 9.94  | 9.79  | 10.23 | 10.12 |
| 1635521 at   | FBgn0035589             | 8.76  | 8.66  | 8.79  | 8.81  | 8.84  | 8.64  |
| 1630768 s at | FBgn0033749 /// FBgn003 | 6.7   | 6.6   | 6.6   | 6.91  | 7.05  | 6.8   |
| 1630398 at   | FBgn0032394             | 9.66  | 9.57  | 9.57  | 9.42  | 9.41  | 9.39  |
| 1628169 at   | FBgn0039555             | 9.96  | 9.86  | 10.11 | 10.13 | 9.88  | 9.7   |
| 1625607 s at | FBgn0011708             | 10.35 | 10.26 | 10.18 | 10.15 | 10.4  | 10.37 |
| 1638547 s at | FBgn0035244             | 9.19  | 9.1   | 8.94  | 8.97  | 9.18  | 9     |
| 1625849 at   | FBgn0029133             | 11.73 | 11.63 | 11.8  | 11.83 | 11.84 | 11.64 |
| 1632888 s at | FBgn0032863 /// FBgn005 | 7.05  | 6.96  | 6.89  | 7.2   | 7.13  | 6.94  |
| 1625211 s at | FBgn0025394             | 9.15  | 9.06  | 9.07  | 8.84  | 8.99  | 9.13  |
| 1639037 at   | FBgn0035038             | 8.82  | 8.72  | 8.8   | 9.06  | 8.91  | 8.83  |
| 1630572 at   | FBgn0011570             | 10.11 | 10.02 | 10.06 | 9.95  | 10.21 | 10.08 |
| 1630696 at   | FBgn0037076             | 7.38  | 7.29  | 7.83  | 7.8   | 7.66  | 7.78  |
| 1632213 s at | FBgn0038381             | 8.25  | 8.16  | 8.04  | 8.2   | 8.65  | 8.43  |
| 1625127 at   | FBgn0004656             | 10.34 | 10.25 | 10.23 | 9.98  | 10.13 | 10.3  |
| 1635388 s at | FBgn0010408             | 14.31 | 14.22 | 14.12 | 14.16 | 14.29 | 14.12 |
| 1637584 at   | ---                     | 8.78  | 8.68  | 8.78  | 9.05  | 8.78  | 8.8   |
| 1625533 at   | FBgn0000229             | 8.98  | 8.89  | 8.94  | 8.82  | 8.47  | 8.62  |
| 1637165 at   | FBgn0038925             | 10.97 | 10.88 | 11.01 | 10.95 | 11.12 | 10.99 |
| 1624145 a at | FBgn0028372             | 8.54  | 8.45  | 8.17  | 8.52  | 8.62  | 8.47  |
| 1640233 at   | FBgn0034345             | 10.35 | 10.25 | 10.58 | 10.04 | 10.36 | 10.25 |
| 1624664 at   | ---                     | 7.62  | 7.53  | 6.91  | 7.28  | 7.54  | 7.54  |

|              |             |       |       |       |       |       |       |
|--------------|-------------|-------|-------|-------|-------|-------|-------|
| 1636813 s at | FBgn0038271 | 11.43 | 11.34 | 11.35 | 11.38 | 11.56 | 11.31 |
| 1626178 s at | FBgn0036518 | 7.4   | 7.31  | 7.38  | 7.01  | 7.35  | 7.73  |
| 1628824 s at | FBgn0029797 | 8.49  | 8.39  | 8.02  | 7.88  | 8.18  | 8.41  |
| 1630151 at   | ---         | 7.29  | 7.2   | 7.12  | 7.72  | 7.4   | 7.29  |
| 1631763 at   | ---         | 7.78  | 7.69  | 7.72  | 7.79  | 7.58  | 7.42  |
| AFFX-r2-P1-c | ---         | 14.05 | 13.95 | 13.87 | 14.06 | 13.93 | 13.8  |
| 1622939 at   | FBgn0020497 | 10.24 | 10.15 | 10.68 | 10.39 | 10.37 | 10.53 |
| 1638726 at   | FBgn0010808 | 9.9   | 9.81  | 9.84  | 9.86  | 10.07 | 9.86  |
| 1623510 at   | FBgn0035252 | 10.13 | 10.03 | 10.18 | 9.61  | 10.39 | 9.92  |
| 1641440 a at | FBgn0036624 | 8.81  | 8.71  | 8.87  | 8.89  | 8.75  | 8.71  |
| 1628291 at   | FBgn0039336 | 8.1   | 8.01  | 8.08  | 8.25  | 8.32  | 8.2   |
| 1639307 at   | FBgn0038182 | 9.02  | 8.93  | 9.07  | 8.94  | 8.92  | 8.88  |
| 1631116 at   | FBgn0015621 | 9.13  | 9.03  | 8.99  | 9.19  | 9.35  | 9.17  |
| 1638942 at   | FBgn0050499 | 11.39 | 11.3  | 11.27 | 11.64 | 11.42 | 11.29 |
| 1631813 at   | FBgn0029885 | 9.69  | 9.59  | 9.81  | 9.58  | 9.74  | 9.59  |
| 1638664 s at | FBgn0001942 | 13.2  | 13.11 | 13.27 | 13.23 | 13.25 | 13.16 |
| 1639057 at   | FBgn0036557 | 9.47  | 9.37  | 9.8   | 9.68  | 9.7   | 9.54  |
| 1640754 at   | FBgn0036449 | 10.11 | 10.01 | 10.09 | 10.12 | 10.09 | 9.92  |
| 1625678 at   | ---         | 7.17  | 7.08  | 7.02  | 7.22  | 7.25  | 7     |
| 1633960 at   | FBgn0038515 | 10.48 | 10.39 | 10.42 | 10.57 | 10.61 | 10.45 |
| 1627151 at   | FBgn0035016 | 9.68  | 9.58  | 9.64  | 9.7   | 9.58  | 9.58  |
| 1628665 at   | FBgn0036828 | 8.74  | 8.65  | 8.74  | 9.11  | 8.86  | 8.57  |
| 1635712 at   | FBgn0030320 | 9.43  | 9.34  | 9.39  | 9.63  | 9.73  | 9.61  |
| 1637494 at   | FBgn0023527 | 10.68 | 10.59 | 10.15 | 10.18 | 10.6  | 10.49 |
| 1633559 at   | FBgn0033906 | 11.11 | 11.02 | 11.19 | 10.85 | 11.12 | 10.93 |
| 1634457 at   | FBgn0031070 | 7.47  | 7.38  | 7.29  | 7.58  | 7.64  | 7.33  |
| 1637520 at   | FBgn0031149 | 10.49 | 10.39 | 10.65 | 10.5  | 10.4  | 10.35 |
| 1624607 at   | ---         | 10.41 | 10.32 | 10.37 | 10.32 | 10.42 | 10.26 |
| 1630308 at   | FBgn0029824 | 8.11  | 8.02  | 8.49  | 8.44  | 8.29  | 8.07  |
| 1634614 at   | FBgn0023532 | 8.22  | 8.12  | 8.1   | 7.92  | 8.24  | 8.04  |
| 1627927 at   | FBgn0034087 | 9.69  | 9.6   | 10.13 | 9.9   | 9.52  | 9.64  |
| 1626016 s at | FBgn0011716 | 8.48  | 8.38  | 8.6   | 8.59  | 8.49  | 8.47  |
| 1635234 at   | ---         | 10.32 | 10.22 | 10.32 | 10.73 | 10.48 | 10.16 |
| 1632278 s at | FBgn0050190 | 8.42  | 8.32  | 8.36  | 8.83  | 8.58  | 8.31  |
| 1624291 at   | FBgn0036062 | 8.74  | 8.65  | 8.53  | 8.64  | 8.75  | 8.78  |
| 1626239 at   | ---         | 8.76  | 8.66  | 9.03  | 8.97  | 9.05  | 9.04  |



|              |             |       |       |       |       |       |       |
|--------------|-------------|-------|-------|-------|-------|-------|-------|
| 1623888 at   | FBgn0039281 | 9.13  | 9.03  | 9.3   | 9.2   | 9.1   | 9.06  |
| 1626696 at   | FBgn0000629 | 8.74  | 8.64  | 8.65  | 8.79  | 8.8   | 8.7   |
| 1636664 at   | FBgn0037405 | 9.13  | 9.03  | 8.6   | 5.89  | 6.18  | 9.07  |
| 1641498 at   | FBgn0037573 | 10.66 | 10.56 | 10.6  | 10.67 | 10.64 | 10.59 |
| 1626509 at   | ---         | 8.27  | 8.18  | 8.52  | 7.9   | 7.56  | 8.22  |
| 1623914 at   | FBgn0017579 | 13.79 | 13.69 | 13.85 | 13.83 | 13.88 | 13.77 |
| 1632323 at   | FBgn0038666 | 7.52  | 7.42  | 7.58  | 7.52  | 7.59  | 7.48  |
| 1629541 at   | FBgn0040751 | 8.32  | 8.22  | 8.38  | 8.49  | 8.19  | 8.13  |
| 1631663 at   | FBgn0039159 | 9.69  | 9.59  | 9.68  | 9.48  | 9.56  | 9.47  |
| 1639411 at   | FBgn0052742 | 10.07 | 9.98  | 10.08 | 10.13 | 10.18 | 10.01 |
| 1633247 at   | FBgn0039233 | 9.94  | 9.84  | 9.98  | 9.85  | 9.9   | 9.78  |
| 1631704 at   | FBgn0039223 | 8.82  | 8.72  | 8.87  | 8.92  | 9.08  | 8.91  |
| 1639279 a at | ---         | 9.52  | 9.42  | 9.69  | 9.54  | 9.4   | 9.46  |
| 1632665 a at | FBgn0030648 | 9.65  | 9.55  | 9.33  | 9.26  | 9.39  | 9.38  |
| 1626964 at   | ---         | 14.06 | 13.96 | 13.95 | 14.05 | 14.1  | 13.95 |
| 1639846 at   | FBgn0040375 | 8.07  | 7.97  | 7.43  | 7.58  | 8.17  | 8.1   |
| 1640595 at   | FBgn0036514 | 8.99  | 8.89  | 8.98  | 8.71  | 8.96  | 8.89  |
| 1639513 at   | FBgn0037891 | 10.02 | 9.92  | 10.16 | 10.15 | 10.19 | 10.05 |
| 1633005 at   | FBgn0029737 | 8.87  | 8.77  | 8.73  | 8.77  | 8.88  | 8.63  |
| 1639718 at   | FBgn0042205 | 7.39  | 7.29  | 7.29  | 7.77  | 7.49  | 7.36  |
| 1632308 at   | FBgn0032691 | 7.75  | 7.65  | 7.81  | 8.03  | 7.87  | 7.75  |
| 1638457 at   | FBgn0037969 | 10.51 | 10.42 | 10.2  | 10.21 | 10.43 | 10.36 |
| 1635970 at   | FBgn0028402 | 9.02  | 8.92  | 8.9   | 8.96  | 8.92  | 8.78  |
| 1627191 a at | FBgn0000578 | 9.29  | 9.19  | 9.04  | 9.29  | 9.05  | 9.09  |
| 1640298 at   | FBgn0030645 | 7.85  | 7.76  | 7.66  | 7.63  | 7.72  | 7.52  |
| 1641494 at   | FBgn0034066 | 10.15 | 10.05 | 9.96  | 10.33 | 10.13 | 10.02 |
| 1641157 at   | FBgn0033421 | 8.69  | 8.59  | 9.07  | 8.81  | 8.97  | 9.03  |
| 1627491 at   | FBgn0001104 | 10.93 | 10.83 | 10.82 | 10.79 | 10.78 | 10.81 |
| 1632836 at   | FBgn0052632 | 8.15  | 8.05  | 7.69  | 7.4   | 8.04  | 7.98  |
| 1624372 at   | FBgn0031376 | 10.16 | 10.06 | 10.01 | 9.95  | 10.16 | 10.13 |
| 1634148 at   | FBgn0036620 | 8.49  | 8.4   | 8.05  | 7.49  | 8.24  | 8.45  |
| 1634925 at   | FBgn0030503 | 8.33  | 8.23  | 8.11  | 8.1   | 8.02  | 8.03  |
| 1624668 s at | ---         | 9.2   | 9.1   | 9.46  | 9.49  | 9.27  | 9.13  |
| 1628251 at   | FBgn0053054 | 7.96  | 7.86  | 7.87  | 7.92  | 7.72  | 7.62  |
| 1624289 at   | FBgn0036366 | 9.35  | 9.25  | 9.1   | 9.29  | 9.32  | 9.29  |
| 1633091 at   | FBgn0030063 | 9.03  | 8.93  | 8.98  | 8.94  | 9.16  | 9.01  |

|              |                         |       |       |       |       |       |       |
|--------------|-------------------------|-------|-------|-------|-------|-------|-------|
| 1636246 a at | FBgn0036090             | 9.23  | 9.13  | 9     | 8.97  | 9.23  | 9.18  |
| 1626523 a at | ---                     | 10.04 | 9.93  | 10.21 | 10.07 | 10.06 | 9.95  |
| 1629741 at   | ---                     | 7.37  | 7.27  | 7.17  | 7.35  | 7.41  | 7.4   |
| 1631876 at   | FBgn0028860             | 9.16  | 9.06  | 9.24  | 9.73  | 9.21  | 9.01  |
| 1623571 a at | FBgn0032886             | 8.62  | 8.52  | 8.8   | 8.67  | 8.68  | 8.58  |
| 1623356 at   | FBgn0037312             | 9.67  | 9.57  | 9.43  | 9.62  | 9.6   | 9.51  |
| 1625876 at   | FBgn0039132             | 11.16 | 11.06 | 11.18 | 11.46 | 11.36 | 11.24 |
| 1635437 at   | FBgn0039274             | 9.72  | 9.61  | 10    | 9.97  | 9.96  | 9.95  |
| 1639136 s at | FBgn0004399             | 10.36 | 10.26 | 10.02 | 10.07 | 10.29 | 10.22 |
| 1632516 at   | FBgn0031991             | 8.93  | 8.83  | 8.83  | 8.88  | 9     | 8.74  |
| 1631001 s at | FBgn0034685             | 10.2  | 10.1  | 9.91  | 10.36 | 10.24 | 10.05 |
| 1634899 a at | FBgn0036702             | 9.51  | 9.41  | 9.55  | 9.6   | 9.54  | 9.36  |
| 1630351 at   | FBgn0051229             | 8.94  | 8.84  | 9.22  | 9.04  | 9.03  | 8.82  |
| 1640547 at   | ---                     | 7.75  | 7.65  | 8.22  | 7.59  | 7.15  | 7.37  |
| 1626637 a at | ---                     | 10.05 | 9.95  | 9.68  | 9.64  | 9.8   | 9.83  |
| 1626584 a at | ---                     | 9.57  | 9.46  | 9.3   | 9.4   | 9.49  | 9.47  |
| 1637428 a at | FBgn0003177             | 10.51 | 10.41 | 10.3  | 10.35 | 10.48 | 10.43 |
| 1632956 at   | FBgn0040337             | 9.36  | 9.26  | 9.15  | 9.36  | 9.31  | 9.2   |
| 1629730 at   | ---                     | 10.77 | 10.67 | 10.84 | 10.49 | 10.55 | 10.52 |
| 1640150 s at | FBgn0033555 /// FBgn001 | 13.6  | 13.5  | 13.64 | 13.67 | 13.67 | 13.53 |
| 1639950 at   | FBgn0036897             | 9.19  | 9.09  | 8.93  | 9.11  | 9.22  | 9.09  |
| 1630698 at   | FBgn0029888             | 10.14 | 10.04 | 10.42 | 10.12 | 10.13 | 10.01 |
| 1628669 at   | FBgn0034617             | 8.82  | 8.72  | 8.97  | 9.13  | 9.17  | 8.89  |
| 1629614 at   | FBgn0051549             | 11.23 | 11.13 | 11.04 | 11.26 | 11.02 | 10.94 |
| 1637482 at   | FBgn0015360             | 9.74  | 9.64  | 9.61  | 9.59  | 9.66  | 9.67  |
| 1626930 at   | FBgn0027582             | 8.99  | 8.89  | 8.83  | 8.94  | 8.96  | 8.94  |
| 1638829 s at | FBgn0002781             | 8     | 7.9   | 7.76  | 7.62  | 8.26  | 8.12  |
| 1638708 s at | FBgn0037444             | 7.21  | 7.11  | 7.39  | 6.97  | 7.05  | 7     |
| 1630437 s at | FBgn0034418             | 9.77  | 9.66  | 9.65  | 9.59  | 9.79  | 9.7   |
| 1624083 s at | FBgn0005278             | 12.73 | 12.63 | 12.73 | 12.53 | 12.53 | 12.48 |
| 1635633 s at | FBgn0033073             | 10.49 | 10.38 | 10.47 | 10.58 | 10.57 | 10.41 |
| 1639288 at   | FBgn0033379             | 8.87  | 8.77  | 9.17  | 9.16  | 8.91  | 8.77  |
| 1627101 at   | FBgn0041094             | 9.99  | 9.89  | 10.02 | 10.13 | 9.87  | 9.91  |
| 1640762 at   | ---                     | 12.12 | 12.01 | 11.78 | 12.02 | 12.21 | 11.99 |
| 1637874 at   | ---                     | 8.3   | 8.2   | 8.19  | 8.36  | 8.33  | 8.15  |
| 1628557 at   | FBgn0033400             | 9.29  | 9.19  | 9.13  | 9.29  | 9.41  | 9.29  |

|              |             |       |       |       |       |       |       |
|--------------|-------------|-------|-------|-------|-------|-------|-------|
| 1632654 at   | FBgn0032762 | 9.11  | 9.01  | 9.56  | 8.98  | 9.09  | 9.21  |
| 1635279 at   | FBgn0040078 | 9.85  | 9.74  | 9.92  | 9.92  | 9.95  | 9.87  |
| 1638803 at   | FBgn0014024 | 9.34  | 9.24  | 9.31  | 9.13  | 9.23  | 9.24  |
| 1626514 at   | FBgn0038396 | 8.27  | 8.16  | 8.24  | 8.35  | 8.2   | 8.12  |
| 1638576 at   | ---         | 9.95  | 9.84  | 10.04 | 10.12 | 10.12 | 9.97  |
| 1641287 at   | FBgn0037717 | 8.1   | 7.99  | 7.94  | 8.3   | 8.08  | 7.93  |
| 1641286 s at | FBgn0015245 | 12.54 | 12.44 | 12.56 | 12.57 | 12.56 | 12.38 |
| 1638164 at   | FBgn0037020 | 8.96  | 8.85  | 8.93  | 8.95  | 9.06  | 8.99  |
| 1634599 s at | FBgn0011760 | 11.1  | 11    | 11.28 | 11.15 | 11.06 | 11.1  |
| 1634995 at   | FBgn0034800 | 7.4   | 7.29  | 7.33  | 7.73  | 7.12  | 6.96  |
| 1629429 at   | ---         | 7.21  | 7.1   | 7     | 7.41  | 7.3   | 7.1   |
| 1625392 at   | ---         | 9.87  | 9.77  | 9.88  | 9.82  | 9.91  | 9.57  |
| 1625860 s at | FBgn0037731 | 8.27  | 8.16  | 8.74  | 8.27  | 8.5   | 8.45  |
| 1625652 s at | FBgn0039543 | 8.99  | 8.88  | 8.79  | 9.06  | 8.95  | 8.86  |
| 1625325 s at | FBgn0052067 | 8     | 7.9   | 8.03  | 8.12  | 7.99  | 7.84  |
| 1623792 a at | FBgn0000447 | 10.04 | 9.93  | 10.37 | 10.25 | 10.19 | 10.06 |
| 1635347 a at | FBgn0030842 | 8.3   | 8.19  | 8.67  | 8.63  | 8.27  | 8.19  |
| 1640202 at   | FBgn0020415 | 9.34  | 9.24  | 9.81  | 9.84  | 8.77  | 8.95  |
| 1630207 at   | FBgn0032481 | 8.79  | 8.68  | 8.63  | 8.79  | 8.83  | 8.67  |
| 1623426 at   | ---         | 7.86  | 7.76  | 7.71  | 8.09  | 8.26  | 7.87  |
| 1636279 at   | FBgn0001341 | 8.55  | 8.44  | 8.74  | 8.59  | 8.5   | 8.44  |
| 1633855 s at | FBgn0031759 | 10.14 | 10.03 | 10.3  | 10.27 | 10.19 | 10.02 |
| 1638171 s at | FBgn0031148 | 10.84 | 10.73 | 10.91 | 10.91 | 10.74 | 10.51 |
| 1638007 at   | FBgn0039828 | 9.77  | 9.66  | 9.98  | 9.81  | 9.84  | 9.72  |
| 1629779 at   | FBgn0020240 | 10.25 | 10.14 | 10.15 | 10.25 | 10.13 | 10.18 |
| 1637307 at   | FBgn0051694 | 10.53 | 10.42 | 10.32 | 10.47 | 10.41 | 10.44 |
| 1628127 at   | FBgn0038190 | 9.15  | 9.04  | 9.26  | 9.39  | 9.55  | 9.18  |
| 1630202 a at | FBgn0033762 | 8.74  | 8.63  | 8.93  | 9.47  | 9.08  | 8.78  |
| 1625656 s at | FBgn0034708 | 9.1   | 9     | 9     | 9.17  | 9.16  | 8.97  |
| 1628798 at   | FBgn0029800 | 9.67  | 9.56  | 9.4   | 9.55  | 9.65  | 9.63  |
| 1628921 s at | FBgn0002781 | 7.91  | 7.8   | 7.78  | 7.64  | 8.04  | 7.98  |
| 1634712 s at | FBgn0020503 | 8.48  | 8.38  | 8.23  | 8.12  | 8.24  | 8.32  |
| 1626002 at   | FBgn0014877 | 8.93  | 8.82  | 8.74  | 8.88  | 8.84  | 8.88  |
| 1635758 s at | FBgn0025790 | 7.59  | 7.49  | 7.68  | 7.67  | 7.54  | 7.54  |
| 1628135 s at | FBgn0025384 | 10.31 | 10.2  | 10.09 | 10.09 | 10.27 | 10.22 |
| 1641026 a at | FBgn0002716 | 7.65  | 7.54  | 7.76  | 7.52  | 7.62  | 7.8   |

|              |                         |       |       |       |       |       |       |
|--------------|-------------------------|-------|-------|-------|-------|-------|-------|
| 1634982 at   | FBgn0038533             | 8.79  | 8.68  | 8.6   | 8.62  | 8.86  | 8.73  |
| 1639219 at   | FBgn0032346             | 9.14  | 9.03  | 9.24  | 9.29  | 9.45  | 9.31  |
| 1628505 at   | FBgn0037644             | 7.03  | 6.92  | 7.11  | 7.27  | 7.16  | 6.96  |
| 1636103 a at | FBgn0037872             | 9.51  | 9.4   | 9.33  | 9.67  | 9.72  | 9.54  |
| 1623968 at   | FBgn0032817             | 8.89  | 8.79  | 8.63  | 8.49  | 8.84  | 8.74  |
| 1627449 at   | FBgn0035825             | 9     | 8.89  | 8.84  | 8.89  | 8.92  | 8.8   |
| 1624198 at   | FBgn0037215             | 8.38  | 8.27  | 8.14  | 8.2   | 8.39  | 8.25  |
| 1629426 s at | FBgn0040070             | 12.38 | 12.27 | 12.07 | 12.06 | 12.38 | 12.34 |
| 1640635 a at | FBgn0020254             | 10.37 | 10.26 | 10.66 | 10.44 | 10.3  | 10.48 |
| 1635202 s at | FBgn0032207             | 9.24  | 9.13  | 9.04  | 9.01  | 9.2   | 9.11  |
| 1630986 s at | FBgn0042094             | 8.51  | 8.41  | 8.84  | 8.13  | 8.4   | 8.27  |
| 1635025 a at | FBgn0029889 /// FBgn002 | 10.92 | 10.81 | 11.11 | 10.97 | 11.09 | 10.83 |
| 1627661 at   | ---                     | 11.27 | 11.16 | 11.35 | 11    | 11.29 | 11.14 |
| 1641579 at   | FBgn0036774             | 10.08 | 9.98  | 9.98  | 10.17 | 10.13 | 9.96  |
| 1625268 at   | FBgn0036336             | 9.02  | 8.91  | 8.69  | 8.88  | 9.07  | 9.03  |
| 1635597 at   | FBgn0028401             | 8.71  | 8.61  | 8.22  | 8.42  | 8.76  | 8.59  |
| 1632100 s at | ---                     | 7.72  | 7.61  | 7.71  | 7.45  | 7.34  | 7.43  |
| 1627362 a at | FBgn0003612             | 9.4   | 9.3   | 9.08  | 9.22  | 9.3   | 9.22  |
| 1631016 at   | FBgn0052822             | 8.51  | 8.4   | 8.69  | 8.94  | 9.03  | 9.17  |
| 1630713 at   | FBgn0011509             | 8.89  | 8.78  | 8.8   | 8.78  | 8.78  | 8.81  |
| 1641262 at   | ---                     | 9.41  | 9.3   | 9.35  | 9.52  | 9.15  | 9.08  |
| 1640449 s at | FBgn0031079             | 9.37  | 9.26  | 9.24  | 9.16  | 9.47  | 9.38  |
| 1631931 s at | FBgn0010415             | 9.73  | 9.62  | 10    | 9.68  | 9.49  | 9.67  |
| 1635089 at   | FBgn0034046             | 8.64  | 8.53  | 8.76  | 8.8   | 8.88  | 8.69  |
| 1634130 a at | FBgn0036030             | 11.32 | 11.21 | 11.7  | 11.66 | 11.21 | 11.29 |
| 1633149 at   | ---                     | 7.19  | 7.08  | 6.75  | 6.87  | 7.33  | 7.23  |
| 1631819 s at | FBgn0016726             | 13.4  | 13.29 | 13.43 | 13.43 | 13.52 | 13.25 |
| 1638438 a at | FBgn0003138             | 10.81 | 10.7  | 10.69 | 10.85 | 10.86 | 10.71 |
| 1632089 at   | FBgn0025629             | 9.48  | 9.37  | 9.68  | 9.36  | 9.36  | 9.39  |
| 1623656 s at | FBgn0046222             | 8.05  | 7.94  | 7.81  | 8.14  | 7.78  | 7.63  |
| 1631833 at   | FBgn0002781             | 9.37  | 9.26  | 9.18  | 8.97  | 9.14  | 8.97  |
| 1629471 at   | FBgn0029666             | 9.6   | 9.49  | 9.49  | 9.76  | 9.56  | 9.53  |
| 1625004 at   | FBgn0042134             | 11.19 | 11.08 | 11.16 | 11.35 | 11.2  | 11.17 |
| 1637484 at   | FBgn0039017             | 7.46  | 7.35  | 7.35  | 7.84  | 7.86  | 7.61  |
| 1625796 at   | FBgn0031060             | 7.87  | 7.76  | 7.43  | 7.55  | 7.8   | 7.69  |
| 1624848 at   | FBgn0027784             | 8.67  | 8.56  | 8.52  | 8.76  | 8.7   | 8.68  |

|              |             |       |       |       |       |       |       |
|--------------|-------------|-------|-------|-------|-------|-------|-------|
| 1639171 at   | ---         | 9.99  | 9.88  | 10.02 | 9.92  | 9.83  | 9.74  |
| 1629563 at   | ---         | 9.39  | 9.28  | 9.53  | 9.4   | 9.41  | 9.3   |
| 1631296 at   | FBgn0039300 | 13.56 | 13.45 | 13.6  | 13.6  | 13.61 | 13.47 |
| 1624488 a at | ---         | 11.37 | 11.26 | 11.28 | 11.35 | 11.47 | 11.34 |
| 1637014 at   | ---         | 8.63  | 8.52  | 8.73  | 8.64  | 8.6   | 8.48  |
| 1630044 s at | FBgn0038293 | 11.14 | 11.02 | 11.15 | 11.18 | 11.25 | 10.8  |
| 1631030 at   | ---         | 10.71 | 10.6  | 10.66 | 10.64 | 10.57 | 10.46 |
| 1637478 s at | FBgn0011224 | 9.46  | 9.35  | 9.26  | 9.56  | 9.03  | 9.25  |
| 1637628 at   | FBgn0034214 | 8.6   | 8.49  | 8.76  | 8.6   | 8.63  | 8.48  |
| 1628224 a at | FBgn0020445 | 9.62  | 9.51  | 9.39  | 9.21  | 9.52  | 9.49  |
| 1639943 at   | FBgn0034628 | 9.03  | 8.92  | 9.02  | 9.25  | 9.23  | 8.99  |
| 1627839 at   | FBgn0035383 | 8.52  | 8.41  | 8.88  | 9.07  | 8.64  | 8.42  |
| 1640992 at   | ---         | 9.67  | 9.56  | 10.19 | 10.03 | 10.01 | 9.93  |
| 1624635 at   | ---         | 10.11 | 10    | 10.32 | 9.98  | 9.99  | 9.9   |
| 1628344 at   | FBgn0000259 | 8.19  | 8.08  | 7.76  | 7.77  | 7.99  | 8.07  |
| 1638350 at   | FBgn0032408 | 9.98  | 9.87  | 10.28 | 10.18 | 9.9   | 9.83  |
| 1630877 a at | FBgn0031997 | 8.86  | 8.75  | 8.91  | 9.05  | 9.15  | 8.96  |
| 1641368 at   | FBgn0032960 | 10.31 | 10.2  | 10.03 | 10.22 | 10.49 | 10.39 |
| 1624489 a at | FBgn0023522 | 10.31 | 10.2  | 10.3  | 10.21 | 10.46 | 10.26 |
| 1629222 at   | FBgn0014455 | 12.67 | 12.55 | 12.72 | 12.72 | 12.75 | 12.42 |
| 1633717 a at | FBgn0035213 | 9.56  | 9.45  | 9.55  | 9.58  | 9.51  | 9.46  |
| 1629791 at   | FBgn0038829 | 10.22 | 10.1  | 10.3  | 9.84  | 9.97  | 10.24 |
| 1623653 at   | ---         | 11.73 | 11.61 | 11.49 | 11.43 | 11.72 | 11.58 |
| 1634663 at   | FBgn0030892 | 9.31  | 9.2   | 8.92  | 8.94  | 9.2   | 9.18  |
| 1625352 s at | FBgn0033800 | 9.32  | 9.21  | 9.14  | 9.27  | 9.36  | 9.16  |
| 1641364 at   | FBgn0030812 | 8.38  | 8.27  | 8.3   | 8.51  | 8.38  | 8.28  |
| 1629030 a at | FBgn0027561 | 8.74  | 8.62  | 8.79  | 8.86  | 8.86  | 8.68  |
| 1640643 a at | FBgn0027518 | 8.47  | 8.36  | 8.29  | 8.64  | 8.57  | 8.33  |
| 1625166 at   | FBgn0040650 | 8.28  | 8.17  | 8.08  | 8.34  | 8.45  | 8.14  |
| 1631790 at   | FBgn0030699 | 9.26  | 9.14  | 9.2   | 9.32  | 9.29  | 9.17  |
| 1626585 s at | FBgn0019886 | 8.89  | 8.78  | 9.05  | 8.98  | 8.94  | 8.67  |
| 1633611 s at | FBgn0052043 | 9.84  | 9.72  | 9.55  | 9.86  | 9.55  | 9.57  |
| 1632756 at   | FBgn0030553 | 7.54  | 7.42  | 7.41  | 7.58  | 7.43  | 7.18  |
| 1629194 s at | FBgn0000052 | 9.77  | 9.65  | 9.9   | 9.77  | 9.71  | 9.59  |
| 1631621 s at | FBgn0001404 | 9.59  | 9.48  | 9.53  | 9.39  | 9.45  | 9.46  |
| 1631426 at   | ---         | 11.06 | 10.95 | 10.94 | 11.28 | 11.21 | 10.92 |

|              |             |       |       |       |       |       |       |
|--------------|-------------|-------|-------|-------|-------|-------|-------|
| 1634919 at   | FBgn0033169 | 8.2   | 8.09  | 8.36  | 8.24  | 8.24  | 7.95  |
| 1630312 s at | FBgn0036064 | 10.41 | 10.29 | 10.56 | 10.46 | 10.62 | 10.41 |
| 1635517 at   | FBgn0033453 | 9.61  | 9.49  | 9.39  | 9.52  | 9.66  | 9.65  |
| 1636168 s at | FBgn0032084 | 8.38  | 8.27  | 8.74  | 8.66  | 6.84  | 6.87  |
| 1627886 at   | ---         | 9.6   | 9.48  | 9.61  | 9.54  | 9.52  | 9.53  |
| 1637689 at   | FBgn0032404 | 11.07 | 10.95 | 11.26 | 11.08 | 11.18 | 11    |
| 1633078 at   | ---         | 8.4   | 8.28  | 8.06  | 8.17  | 8.4   | 8.2   |
| 1624415 s at | FBgn0037680 | 9.82  | 9.71  | 9.67  | 9.72  | 9.91  | 9.84  |
| 1639153 at   | FBgn0033882 | 9.17  | 9.05  | 9.13  | 9.22  | 9.41  | 9.17  |
| 1628887 a at | ---         | 7.64  | 7.53  | 7.38  | 7.67  | 7.88  | 7.66  |
| 1631897 s at | FBgn0033247 | 9.67  | 9.55  | 9.65  | 9.65  | 9.71  | 9.48  |
| 1627795 at   | ---         | 8.61  | 8.5   | 8.84  | 8.95  | 8.64  | 8.72  |
| 1625856 at   | FBgn0000472 | 10.27 | 10.15 | 10.36 | 10.17 | 10.36 | 10.24 |
| 1627459 at   | FBgn0031777 | 7.89  | 7.77  | 8.3   | 7.91  | 7.68  | 7.82  |
| 1623499 at   | FBgn0033550 | 7.68  | 7.56  | 7.4   | 7.37  | 7.57  | 7.54  |
| 1639908 a at | FBgn0036661 | 10.38 | 10.26 | 10.29 | 10.43 | 10.52 | 10.36 |
| 1626568 at   | FBgn0038551 | 9.59  | 9.47  | 9.42  | 9.7   | 9.81  | 9.72  |
| 1623296 at   | FBgn0052625 | 9.18  | 9.06  | 9.57  | 10.22 | 9.63  | 9.17  |
| 1628764 at   | ---         | 10.47 | 10.36 | 10.31 | 10.35 | 10.42 | 10.29 |
| 1633046 at   | FBgn0031740 | 8.57  | 8.46  | 8.45  | 8.78  | 8.88  | 8.61  |
| 1633543 s at | FBgn0010341 | 11.15 | 11.03 | 10.47 | 10.38 | 11.13 | 11.03 |
| 1632613 at   | FBgn0028983 | 7.08  | 6.96  | 6.82  | 6.96  | 6.69  | 6.56  |
| 1625230 a at | FBgn0051738 | 8.7   | 8.58  | 8.73  | 8.72  | 8.72  | 8.74  |
| 1624683 at   | ---         | 10.17 | 10.05 | 10.2  | 10.03 | 10.3  | 10.13 |
| 1628602 a at | FBgn0032923 | 9.24  | 9.12  | 9.06  | 8.87  | 9.27  | 9.21  |
| 1640043 s at | ---         | 8.45  | 8.34  | 8.52  | 8.06  | 8.17  | 8.21  |
| 1641537 s at | ---         | 8.95  | 8.83  | 8.92  | 8.89  | 8.81  | 8.81  |
| 1637429 at   | FBgn0034086 | 8.35  | 8.23  | 8.53  | 8.73  | 8.72  | 8.57  |
| 1637605 s at | FBgn0035346 | 7.97  | 7.86  | 7.77  | 6.21  | 8.06  | 7.83  |
| 1630579 at   | ---         | 7.63  | 7.51  | 7.61  | 7.91  | 7.88  | 7.69  |
| 1626556 at   | FBgn0038369 | 7.74  | 7.62  | 7.81  | 7.72  | 7.73  | 7.74  |
| 1641032 at   | FBgn0035025 | 8.59  | 8.47  | 8.7   | 8.87  | 8.94  | 8.71  |
| 1635589 at   | FBgn0039737 | 10.4  | 10.28 | 10.95 | 10.66 | 10.8  | 10.58 |
| 1623843 at   | FBgn0038400 | 10.7  | 10.59 | 10.89 | 10.73 | 11.03 | 10.78 |
| 1634940 at   | FBgn0020545 | 10.35 | 10.23 | 9.79  | 10.12 | 10.35 | 10.11 |
| 1636396 at   | FBgn0015379 | 8.13  | 8.01  | 7.86  | 7.93  | 8.32  | 8.14  |

|              |             |       |       |       |       |       |       |
|--------------|-------------|-------|-------|-------|-------|-------|-------|
| 1627017 at   | FBgn0024432 | 11.32 | 11.2  | 11.28 | 11.25 | 11.32 | 11.28 |
| 1640435 at   | FBgn0026250 | 11.83 | 11.71 | 12.09 | 11.97 | 11.82 | 11.78 |
| 1636141 s at | FBgn0001139 | 7.79  | 7.67  | 8.03  | 7.98  | 7.64  | 7.8   |
| 1630393 a at | FBgn0031450 | 8.82  | 8.7   | 8.54  | 8.78  | 8.8   | 8.55  |
| 1630421 at   | ---         | 8.92  | 8.8   | 8.95  | 8.84  | 8.92  | 8.83  |
| 1626325 a at | FBgn0033060 | 7.71  | 7.6   | 7.69  | 7.92  | 7.76  | 7.73  |
| 1633115 a at | FBgn0026145 | 7.52  | 7.4   | 7.98  | 7.84  | 7.66  | 7.48  |
| 1629754 s at | FBgn0013263 | 10.32 | 10.2  | 10.09 | 10.02 | 10.1  | 10.09 |
| 1641215 s at | FBgn0033241 | 10.18 | 10.07 | 10.12 | 10.29 | 10.4  | 10.19 |
| 1639192 at   | ---         | 10.26 | 10.14 | 9.99  | 9.99  | 10.27 | 10.03 |
| 1630236 s at | FBgn0034390 | 11.17 | 11.05 | 11.44 | 11.25 | 11.16 | 11.14 |
| 1634561 s at | FBgn0052675 | 7.65  | 7.53  | 7.79  | 7.63  | 7.75  | 7.41  |
| 1637216 at   | FBgn0036942 | 7.69  | 7.57  | 7.44  | 7.44  | 7.44  | 7.34  |
| 1623013 s at | ---         | 7.47  | 7.35  | 7.7   | 7.15  | 7.26  | 7.37  |
| 1629658 at   | FBgn0032120 | 10.44 | 10.32 | 10.24 | 10.14 | 10.2  | 10.41 |
| 1623513 at   | FBgn0030354 | 8.93  | 8.81  | 9.03  | 9.1   | 8.75  | 8.57  |
| 1629581 at   | FBgn0035404 | 10.26 | 10.14 | 10.19 | 10.14 | 10.38 | 10.1  |
| 1626650 at   | FBgn0002781 | 7.61  | 7.49  | 7.32  | 7.65  | 8.02  | 7.76  |
| 1637710 at   | FBgn0004167 | 7.54  | 7.42  | 7.8   | 7.53  | 7.3   | 7.31  |
| 1638685 at   | ---         | 12.29 | 12.17 | 12.21 | 12.27 | 12.46 | 12.31 |
| 1640105 a at | FBgn0033244 | 7.5   | 7.38  | 7.7   | 7.74  | 7.62  | 7.44  |
| 1631021 at   | FBgn0039018 | 9.05  | 8.93  | 9.08  | 9.46  | 9.27  | 8.97  |
| 1628587 at   | FBgn0035760 | 8.18  | 8.06  | 8.21  | 8.38  | 8.38  | 8.14  |
| 1636974 at   | FBgn0041604 | 9.4   | 9.27  | 9.28  | 9.24  | 9.21  | 9     |
| 1635215 at   | FBgn0029942 | 9.52  | 9.4   | 9.54  | 9.81  | 9.58  | 9.36  |
| 1624981 a at | FBgn0035630 | 11.86 | 11.74 | 11.88 | 11.83 | 11.84 | 11.7  |
| 1631868 at   | FBgn0029687 | 11.32 | 11.19 | 11.34 | 11.38 | 11.19 | 11.39 |
| 1626925 at   | FBgn0013974 | 10.25 | 10.13 | 10.08 | 9.88  | 10.15 | 10.2  |
| 1635914 at   | FBgn0032689 | 10.5  | 10.38 | 10.2  | 10.33 | 10.32 | 10.38 |
| 1627050 at   | FBgn0032922 | 8     | 7.87  | 8.13  | 8.36  | 7.84  | 7.7   |
| 1626407 at   | FBgn0032509 | 10.52 | 10.4  | 10.69 | 10.72 | 10.54 | 10.41 |
| 1634656 s at | FBgn0064127 | 10.28 | 10.16 | 10.28 | 10.48 | 10.44 | 10.19 |
| 1635310 s at | FBgn0051687 | 9.5   | 9.38  | 9.28  | 9.52  | 9.43  | 9.32  |
| 1639266 at   | FBgn0030466 | 8.72  | 8.59  | 8.66  | 8.59  | 8.73  | 8.57  |
| 1638682 a at | ---         | 7.96  | 7.84  | 7.57  | 7.73  | 7.78  | 8.01  |
| 1629939 a at | FBgn0035298 | 8.96  | 8.83  | 9.13  | 8.84  | 8.74  | 8.57  |

|              |                         |       |       |       |       |       |       |
|--------------|-------------------------|-------|-------|-------|-------|-------|-------|
| 1633322 at   | FBgn0030177             | 9.13  | 9.01  | 9.19  | 9.06  | 9.13  | 9.14  |
| 1635751 at   | FBgn0052069             | 10.58 | 10.46 | 9.92  | 10.12 | 10.03 | 10.07 |
| 1624766 s at | FBgn0011764             | 10.68 | 10.56 | 10.38 | 10.2  | 10.1  | 10.38 |
| 1632262 at   | FBgn0036405             | 9.28  | 9.16  | 9.09  | 8.85  | 9.28  | 9.23  |
| 1636478 at   | FBgn0031832             | 8.7   | 8.58  | 9.03  | 8.94  | 8.68  | 8.61  |
| 1629972 at   | FBgn0030863             | 7.73  | 7.61  | 7.66  | 7.75  | 7.97  | 7.77  |
| 1627655 at   | FBgn0050410             | 10.79 | 10.67 | 10.77 | 10.87 | 10.8  | 10.54 |
| 1639040 s at | FBgn0034049             | 7.79  | 7.66  | 7.58  | 7.45  | 7.62  | 7.5   |
| 1630410 at   | FBgn0052163             | 7.79  | 7.67  | 7.78  | 7.9   | 7.86  | 7.56  |
| 1634562 s at | FBgn0034695             | 9.44  | 9.32  | 9.19  | 9.03  | 9.25  | 9.27  |
| 1634782 s at | FBgn0015019             | 11.83 | 11.7  | 11.97 | 11.91 | 11.86 | 11.69 |
| 1634787 at   | FBgn0052638             | 8.72  | 8.6   | 8.68  | 8.41  | 8.98  | 8.83  |
| 1640020 at   | FBgn0030520             | 10.69 | 10.56 | 10.88 | 10.8  | 10.71 | 10.45 |
| 1633215 at   | FBgn0035464             | 9.89  | 9.77  | 9.71  | 9.75  | 9.83  | 9.65  |
| 1638709 at   | FBgn0024252             | 7.15  | 7.02  | 7.11  | 6.61  | 7.14  | 7.07  |
| 1630242 at   | FBgn0051108 /// FBgn005 | 7.64  | 7.52  | 7.85  | 7.84  | 7.7   | 7.48  |
| 1639016 at   | FBgn0030679             | 9.53  | 9.4   | 9.38  | 9.37  | 9.5   | 9.24  |
| 1632034 at   | FBgn0037592             | 8.46  | 8.34  | 8.4   | 8.3   | 8.47  | 8.21  |
| 1639421 at   | ---                     | 9.09  | 8.97  | 9.08  | 9     | 9.05  | 8.97  |
| 1631243 s at | FBgn0010877             | 10.57 | 10.45 | 10.48 | 10.45 | 10.34 | 10.4  |
| 1626276 at   | FBgn0035251             | 9.39  | 9.26  | 9.38  | 9.26  | 9.36  | 9.22  |
| 1636081 at   | FBgn0051212             | 8.57  | 8.45  | 8.62  | 8.2   | 8.44  | 8.44  |
| 1640339 at   | ---                     | 9.32  | 9.19  | 9.11  | 9.06  | 9.11  | 9.1   |
| 1628978 at   | FBgn0034873             | 9.6   | 9.48  | 9.44  | 9.65  | 9.6   | 9.52  |
| 1639625 at   | ---                     | 9.84  | 9.72  | 9.58  | 9.87  | 9.62  | 9.68  |
| 1641347 s at | ---                     | 11.03 | 10.91 | 11.09 | 10.87 | 10.86 | 10.82 |
| 1639976 at   | FBgn0033551             | 10.29 | 10.17 | 10.18 | 10.3  | 10.39 | 10.34 |
| 1631119 at   | FBgn0035533             | 9.73  | 9.6   | 9.67  | 9.66  | 9.71  | 9.6   |
| 1633476 at   | FBgn0034629             | 8.55  | 8.42  | 8.53  | 8.86  | 8.69  | 8.28  |
| 1627826 s at | FBgn0033459             | 8.87  | 8.75  | 9.77  | 9.24  | 8.84  | 9.12  |
| 1623762 at   | ---                     | 9.39  | 9.27  | 9.2   | 9.4   | 9.71  | 9.49  |
| 1629752 at   | FBgn0032444             | 11.65 | 11.53 | 11.63 | 11.61 | 11.65 | 11.39 |
| 1641123 at   | ---                     | 10.74 | 10.61 | 10.65 | 10.73 | 10.92 | 10.84 |
| 1633997 s at | ---                     | 9.77  | 9.64  | 9.42  | 9.42  | 9.64  | 9.58  |
| 1625925 at   | FBgn0051618             | 12.58 | 12.46 | 12.37 | 12.47 | 12.61 | 12.53 |
| 1640080 at   | FBgn0032919             | 10.38 | 10.26 | 10.69 | 10.36 | 10.47 | 10.52 |



|              |             |       |       |       |       |       |       |
|--------------|-------------|-------|-------|-------|-------|-------|-------|
| 1630764 at   | ---         | 8.33  | 8.21  | 8.41  | 8.31  | 8.37  | 8.36  |
| 1628514 at   | FBgn0031267 | 10.04 | 9.92  | 9.93  | 10.22 | 10.13 | 9.99  |
| 1624465 at   | FBgn0014075 | 9.39  | 9.27  | 9.23  | 9.3   | 9.28  | 9.27  |
| 1631226 at   | FBgn0028992 | 9.87  | 9.74  | 10.04 | 10.07 | 10.06 | 9.75  |
| 1622962 a at | FBgn0031500 | 7.64  | 7.51  | 7.73  | 7.85  | 7.66  | 7.38  |
| 1625675 a at | FBgn0034230 | 7.86  | 7.74  | 7.82  | 7.82  | 7.83  | 7.75  |
| 1633755 at   | FBgn0038640 | 8.12  | 8     | 8.42  | 8.22  | 8.25  | 7.95  |
| 1635138 at   | FBgn0004509 | 7.99  | 7.87  | 8.06  | 7.92  | 7.95  | 7.84  |
| 1633718 at   | FBgn0032242 | 9.25  | 9.12  | 9.63  | 9.34  | 9.19  | 9.03  |
| 1640734 a at | FBgn0038721 | 7.74  | 7.61  | 7.9   | 8.33  | 8.19  | 7.97  |
| 1637545 at   | FBgn0030329 | 10.54 | 10.41 | 10.31 | 10.27 | 10.16 | 10.25 |
| 1629550 at   | FBgn0037252 | 9.25  | 9.12  | 9.1   | 9.08  | 9.17  | 9.18  |
| 1623771 at   | FBgn0029709 | 10.29 | 10.16 | 10.21 | 10.21 | 10.21 | 10.13 |
| 1635718 at   | ---         | 9.58  | 9.45  | 9.64  | 9.87  | 9.49  | 9.47  |
| 1631094 s at | FBgn0032901 | 8.94  | 8.81  | 8.8   | 8.75  | 8.82  | 8.68  |
| 1633110 at   | FBgn0038869 | 8.62  | 8.5   | 8.99  | 8.66  | 8.79  | 8.68  |
| AFFX-r2-Ec-l | ---         | 12.36 | 12.23 | 12.49 | 12.7  | 12.14 | 11.84 |
| 1637597 a at | FBgn0037652 | 10.52 | 10.39 | 10.54 | 10.55 | 10.45 | 10.37 |
| AFFX-Dros-e  | FBgn0001942 | 11.62 | 11.49 | 11.45 | 10.97 | 11.72 | 11.55 |
| 1632803 at   | FBgn0024986 | 7.7   | 7.57  | 7.61  | 7.76  | 7.85  | 7.72  |
| 1629877 at   | FBgn0051683 | 7.27  | 7.15  | 7.36  | 6.83  | 7.01  | 7.05  |
| 1633520 at   | ---         | 9.21  | 9.08  | 9.16  | 9.25  | 9.74  | 9.38  |
| 1639554 at   | FBgn0023184 | 12.34 | 12.21 | 12.48 | 12.3  | 12.23 | 12.16 |
| 1626458 at   | FBgn0038788 | 8.82  | 8.69  | 8.56  | 8.48  | 8.86  | 8.73  |
| 1634306 at   | FBgn0004387 | 8.24  | 8.11  | 8.3   | 7.88  | 8.16  | 8.21  |
| 1637285 s at | FBgn0029161 | 10.67 | 10.54 | 10.67 | 10.52 | 10.67 | 10.57 |
| 1632285 at   | ---         | 7.53  | 7.4   | 8.04  | 7.52  | 7.31  | 7.63  |
| 1640084 a at | FBgn0033258 | 8.59  | 8.46  | 8.4   | 8.57  | 8.78  | 8.59  |
| 1636207 at   | FBgn0031608 | 9.11  | 8.98  | 8.8   | 8.64  | 9.04  | 8.95  |
| 1639787 at   | FBgn0037918 | 9.42  | 9.29  | 8.82  | 8.92  | 9.38  | 9.27  |
| 1631578 s at | FBgn0031047 | 9.83  | 9.7   | 9.6   | 9.78  | 9.78  | 9.68  |
| 1626839 s at | ---         | 10.93 | 10.8  | 10.93 | 10.91 | 10.87 | 10.91 |
| 1627456 s at | ---         | 9.96  | 9.83  | 9.2   | 9.46  | 9.46  | 9.66  |
| 1624644 a at | FBgn0039560 | 7.89  | 7.76  | 7.85  | 7.71  | 7.91  | 7.79  |
| 1631699 at   | FBgn0031610 | 8.41  | 8.28  | 8.33  | 8.65  | 8.78  | 8.5   |
| 1636123 at   | FBgn0032012 | 9.47  | 9.34  | 9.37  | 9.32  | 9.4   | 9.29  |

|              |             |       |       |       |       |       |       |
|--------------|-------------|-------|-------|-------|-------|-------|-------|
| 1631059 at   | FBgn0003093 | 8.95  | 8.82  | 8.9   | 8.61  | 8.67  | 8.84  |
| 1627691 at   | FBgn0022338 | 11.72 | 11.6  | 11.49 | 11.81 | 11.74 | 11.68 |
| 1634398 a at | FBgn0000463 | 9.08  | 8.95  | 9.23  | 9.12  | 9.12  | 9.15  |
| 1640181 at   | FBgn0036599 | 7.24  | 7.11  | 6.96  | 6.8   | 7.02  | 7.17  |
| 1629257 s at | ---         | 10.94 | 10.81 | 10.19 | 10.48 | 10.75 | 10.68 |
| 1624765 at   | ---         | 9.92  | 9.79  | 10.11 | 9.95  | 9.84  | 9.67  |
| 1631122 at   | FBgn0039055 | 9.54  | 9.41  | 9.54  | 9.62  | 9.53  | 9.47  |
| 1635187 s at | FBgn0039600 | 8.97  | 8.84  | 8.86  | 8.68  | 8.88  | 8.83  |
| 1627206 at   | FBgn0029785 | 11.59 | 11.46 | 11.64 | 11.72 | 12.01 | 11.79 |
| 1625373 at   | FBgn0038286 | 10.41 | 10.28 | 10.32 | 10.41 | 10.36 | 10.34 |
| 1636651 a at | FBgn0004179 | 10.05 | 9.92  | 9.66  | 9.53  | 9.73  | 9.81  |
| 1625949 at   | FBgn0001128 | 11.33 | 11.2  | 11.09 | 11.35 | 11.54 | 11.29 |
| 1639305 a at | FBgn0019968 | 9.63  | 9.5   | 9.29  | 9.13  | 9.48  | 9.53  |
| 1629158 at   | FBgn0032203 | 10.22 | 10.09 | 9.88  | 10.27 | 10.35 | 10.21 |
| 1626602 at   | FBgn0020618 | 13.55 | 13.42 | 13.61 | 13.66 | 13.7  | 13.43 |
| 1624348 a at | FBgn0035633 | 9.17  | 9.04  | 9.17  | 9.26  | 9.26  | 9.15  |
| 1635057 s at | FBgn0031161 | 8.16  | 8.03  | 8.44  | 8.33  | 8.53  | 8.45  |
| 1635568 at   | FBgn0034641 | 9.03  | 8.9   | 8.91  | 8.9   | 9.11  | 8.97  |
| 1634405 s at | FBgn0014001 | 8.66  | 8.53  | 8.45  | 8.49  | 8.42  | 8.58  |
| 1632327 at   | FBgn0038766 | 7.43  | 7.3   | 7.42  | 7.75  | 7.62  | 7.57  |
| 1631244 a at | FBgn0005648 | 10.16 | 10.02 | 10.54 | 10.36 | 10.11 | 10.08 |
| 1639676 at   | FBgn0032744 | 7.1   | 6.97  | 6.79  | 6.99  | 6.7   | 6.58  |
| 1630931 at   | FBgn0031452 | 8.77  | 8.64  | 8.66  | 8.72  | 8.72  | 8.61  |
| 1636789 s at | FBgn0050404 | 10.09 | 9.96  | 9.98  | 10.06 | 10.09 | 10.04 |
| 1640460 at   | FBgn0036500 | 8.97  | 8.83  | 8.88  | 8.78  | 8.99  | 8.77  |
| 1629948 at   | FBgn0035955 | 9.84  | 9.71  | 9.89  | 9.85  | 9.94  | 10.04 |
| 1627910 s at | FBgn0037607 | 11.37 | 11.24 | 11.47 | 11.46 | 11.3  | 11.01 |
| 1632272 a at | FBgn0039581 | 9.32  | 9.19  | 9.4   | 9.52  | 9.45  | 9.25  |
| 1623889 at   | FBgn0035333 | 8.91  | 8.78  | 8.7   | 8.74  | 8.99  | 8.94  |
| 1636388 at   | FBgn0031036 | 8.18  | 8.05  | 8.35  | 8.52  | 8.34  | 8.17  |
| 1632521 at   | FBgn0029906 | 7.89  | 7.76  | 7.52  | 7.59  | 8.04  | 7.6   |
| 1630280 s at | FBgn0030726 | 10.02 | 9.88  | 10.39 | 10.21 | 9.97  | 9.76  |
| 1639962 a at | FBgn0019624 | 12.16 | 12.03 | 12.29 | 12.1  | 12.21 | 12.13 |
| 1627102 at   | FBgn0030670 | 9.99  | 9.85  | 9.68  | 9.61  | 10    | 9.85  |
| 1632003 a at | FBgn0004369 | 7.37  | 7.24  | 7.5   | 8.11  | 7.42  | 7.09  |
| 1631785 at   | FBgn0004461 | 10.32 | 10.19 | 9.99  | 10.04 | 10.15 | 10.03 |

|              |                         |       |       |       |       |       |       |
|--------------|-------------------------|-------|-------|-------|-------|-------|-------|
| 1634934 at   | FBgn0036900             | 9.06  | 8.92  | 8.6   | 8.97  | 8.75  | 8.83  |
| 1629015 a at | FBgn0025641             | 9.94  | 9.81  | 9.84  | 9.89  | 10.02 | 9.87  |
| 1623842 a at | FBgn0011754             | 10.06 | 9.93  | 9.72  | 9.69  | 9.91  | 9.78  |
| 1635376 at   | FBgn0030809             | 8.02  | 7.89  | 7.62  | 8.01  | 8.01  | 7.97  |
| 1629106 at   | FBgn0029990             | 10.28 | 10.14 | 8.33  | 8     | 9.44  | 9.66  |
| 1630105 at   | FBgn0035993 /// FBgn003 | 9.52  | 9.39  | 9.32  | 9.45  | 9.87  | 9.5   |
| 1627647 at   | FBgn0037788             | 8.78  | 8.64  | 8.91  | 8.78  | 8.81  | 8.69  |
| 1635687 at   | FBgn0033715             | 9.26  | 9.12  | 9.07  | 9.54  | 9.24  | 8.96  |
| 1627349 at   | FBgn0010520             | 9.44  | 9.31  | 9.87  | 9.73  | 9.69  | 9.61  |
| 1632019 s at | FBgn0028540             | 7.39  | 7.25  | 8.19  | 7.57  | 7.19  | 7.38  |
| 1631775 at   | ---                     | 12.17 | 12.04 | 11.65 | 12.09 | 11.84 | 11.72 |
| 1636840 at   | ---                     | 10.27 | 10.14 | 10.52 | 10.89 | 10.42 | 10.19 |
| 1624481 a at | FBgn0051534             | 9.34  | 9.2   | 9.36  | 8.97  | 8.75  | 8.94  |
| 1634048 a at | FBgn0027348             | 10.73 | 10.6  | 10.69 | 10.8  | 10.7  | 10.6  |
| 1636347 at   | ---                     | 8.69  | 8.56  | 8.26  | 8.75  | 8.5   | 8.36  |
| 1627059 at   | FBgn0025117             | 11.78 | 11.64 | 11.97 | 11.77 | 11.9  | 11.65 |
| 1638295 s at | FBgn0037279             | 8.81  | 8.68  | 8.84  | 8.82  | 8.87  | 8.71  |
| 1631828 s at | FBgn0033738             | 9.13  | 8.99  | 9.15  | 9.12  | 9.23  | 9     |
| 1640493 at   | ---                     | 7.36  | 7.23  | 7.24  | 7.66  | 7.58  | 7.33  |
| 1633370 s at | FBgn0030299             | 7.34  | 7.2   | 7.55  | 6.99  | 6.75  | 7.09  |
| 1630154 at   | FBgn0035998             | 9.58  | 9.45  | 8.96  | 9.35  | 9.49  | 9.34  |
| 1634593 at   | ---                     | 12.18 | 12.04 | 11.47 | 11.9  | 11.83 | 11.97 |
| 1626680 at   | FBgn0032512             | 8.04  | 7.91  | 7.97  | 7.95  | 8.08  | 7.84  |
| 1635352 s at | FBgn0020611             | 9.93  | 9.79  | 10.1  | 9.74  | 9.84  | 9.64  |
| 1637124 at   | FBgn0024509             | 10.32 | 10.19 | 10.09 | 10.18 | 10.29 | 10.1  |
| 1638126 at   | FBgn0033385             | 10.1  | 9.97  | 10.16 | 10.18 | 10.14 | 10.1  |
| 1632245 a at | FBgn0028985             | 9     | 8.86  | 8.75  | 8.88  | 8.55  | 8.31  |
| 1631464 at   | FBgn0038586             | 7.98  | 7.85  | 7.37  | 7.67  | 7.75  | 7.74  |
| 1624752 at   | FBgn0036770             | 8.05  | 7.91  | 7.72  | 7.6   | 7.75  | 7.46  |
| 1635335 at   | FBgn0027903             | 10.01 | 9.87  | 9.8   | 10.22 | 10.05 | 9.88  |
| 1631087 a at | FBgn0037248             | 9.8   | 9.66  | 9.9   | 9.68  | 9.72  | 9.78  |
| 1635030 at   | FBgn0033945             | 7.75  | 7.61  | 7.48  | 8.08  | 8.08  | 7.87  |
| 1637823 at   | FBgn0030554             | 8.36  | 8.22  | 8.17  | 8.3   | 8.7   | 8.34  |
| 1625337 s at | FBgn0002626             | 13.78 | 13.64 | 13.81 | 13.84 | 13.86 | 13.71 |
| 1622982 at   | FBgn0024846             | 9.98  | 9.84  | 9.82  | 9.95  | 10.01 | 9.77  |
| 1639747 at   | FBgn0050291             | 8.15  | 8.01  | 8.31  | 8.07  | 8.21  | 8.05  |

|              |                         |       |       |       |       |       |       |
|--------------|-------------------------|-------|-------|-------|-------|-------|-------|
| 1634087 at   | FBgn0035523             | 9     | 8.87  | 8.96  | 8.91  | 8.98  | 8.83  |
| 1638513 s at | FBgn0039213             | 10.36 | 10.22 | 10.55 | 10.11 | 9.88  | 10.02 |
| 1638634 at   | FBgn0052448             | 7.55  | 7.41  | 7.9   | 7.18  | 6.96  | 7.22  |
| 1630724 at   | FBgn0039869             | 11.68 | 11.54 | 11.53 | 11.88 | 11.62 | 11.28 |
| 1635784 a at | ---                     | 13.32 | 13.18 | 13.19 | 13.27 | 13.2  | 13.21 |
| 1628688 at   | FBgn0039831             | 10.48 | 10.34 | 10.16 | 10.56 | 10.44 | 10.5  |
| 1633169 at   | FBgn0024510             | 8.03  | 7.89  | 8.34  | 8.45  | 8.35  | 8.28  |
| 1629008 at   | FBgn0038275             | 8.51  | 8.37  | 8.85  | 8.49  | 8.71  | 8.7   |
| 1639503 at   | FBgn0003888             | 8.46  | 8.32  | 8.42  | 7.71  | 7.61  | 8.02  |
| 1624213 at   | FBgn0039764             | 8.54  | 8.4   | 8.47  | 8.9   | 8.79  | 8.66  |
| 1625231 at   | ---                     | 9.46  | 9.32  | 9.17  | 9.37  | 9.44  | 9.36  |
| 1622921 at   | FBgn0052022             | 9.33  | 9.19  | 9.37  | 9.63  | 9.45  | 9.36  |
| 1637743 at   | FBgn0037760             | 8.85  | 8.71  | 8.83  | 8.77  | 8.77  | 8.79  |
| 1626220 at   | FBgn0035996             | 7.82  | 7.68  | 7.82  | 7.95  | 7.8   | 7.8   |
| 1640309 s at | FBgn0010280             | 8.44  | 8.3   | 8.18  | 8.16  | 8.41  | 8.47  |
| 1635151 at   | FBgn0029502             | 9.19  | 9.05  | 9.39  | 9.51  | 9.21  | 8.94  |
| 1627228 at   | FBgn0030183             | 8.68  | 8.54  | 8.84  | 9.06  | 8.9   | 9.11  |
| 1635224 s at | FBgn0001291             | 9.21  | 9.07  | 8.97  | 9.22  | 9.33  | 9.02  |
| 1635189 at   | ---                     | 9.05  | 8.91  | 10.99 | 9.17  | 9.23  | 7.59  |
| 1639786 at   | FBgn0034050             | 7.86  | 7.72  | 7.22  | 7.46  | 7.85  | 7.76  |
| 1626412 at   | FBgn0035714             | 9.4   | 9.26  | 9.37  | 9.34  | 9.37  | 9.27  |
| 1638704 at   | FBgn0030287             | 9.84  | 9.7   | 9.66  | 9.67  | 9.83  | 9.72  |
| 1632721 at   | FBgn0021874             | 8.54  | 8.4   | 8.73  | 8.42  | 8.52  | 8.21  |
| 1633804 at   | FBgn0036921             | 11.25 | 11.1  | 11.38 | 11.33 | 11.32 | 11.25 |
| 1630536 at   | FBgn0002781             | 7.49  | 7.35  | 7.09  | 7.37  | 7.48  | 7.33  |
| 1637469 at   | FBgn0053198             | 9.48  | 9.34  | 8.95  | 9.67  | 9.69  | 9.45  |
| 1633779 s at | ---                     | 10.13 | 9.99  | 10.08 | 10.02 | 9.99  | 10.23 |
| 1632389 at   | ---                     | 9.02  | 8.87  | 9.05  | 8.98  | 9.14  | 9.03  |
| 1625719 at   | FBgn0002921             | 7.12  | 6.98  | 7.95  | 7.47  | 6.96  | 7.13  |
| 1628028 s at | FBgn0029897             | 13.3  | 13.16 | 13.3  | 13.16 | 13.32 | 13.17 |
| 1641345 at   | FBgn0036837 /// FBgn003 | 8.53  | 8.39  | 8.16  | 8.16  | 8.38  | 8.29  |
| 1627694 at   | ---                     | 9.81  | 9.67  | 9.84  | 9.63  | 9.68  | 9.58  |
| 1639947 s at | FBgn0033166             | 9.5   | 9.35  | 9.39  | 9.44  | 9.48  | 9.31  |
| 1636644 at   | ---                     | 10.28 | 10.14 | 10.3  | 10.12 | 10.14 | 10.11 |
| 1623495 at   | ---                     | 9.33  | 9.19  | 8.97  | 8.88  | 9.52  | 9.24  |
| 1627506 at   | FBgn0000547             | 8.98  | 8.84  | 8.5   | 8.7   | 8.67  | 8.78  |

|              |             |       |       |       |       |       |       |
|--------------|-------------|-------|-------|-------|-------|-------|-------|
| 1634034 at   | FBgn0036257 | 8.75  | 8.61  | 8.43  | 8.67  | 8.68  | 8.53  |
| 1631933 at   | FBgn0037759 | 7.11  | 6.96  | 6.66  | 6.48  | 7.25  | 7.23  |
| 1623436 a at | FBgn0010460 | 10.61 | 10.46 | 10.21 | 10.21 | 10.42 | 10.31 |
| 1626444 at   | FBgn0003062 | 11.6  | 11.46 | 11.65 | 10.98 | 11.38 | 11.41 |
| 1638509 at   | ---         | 7.45  | 7.3   | 7.27  | 7.48  | 8.32  | 8.11  |
| 1639672 at   | FBgn0030091 | 7.2   | 7.06  | 7     | 7.12  | 7.24  | 7.11  |
| 1634660 at   | FBgn0039507 | 9.67  | 9.53  | 9.51  | 9.38  | 9.79  | 9.65  |
| 1623758 at   | FBgn0032150 | 7.49  | 7.35  | 7.56  | 7.64  | 7.67  | 7.48  |
| 1633270 at   | ---         | 7.6   | 7.45  | 7.17  | 7.17  | 7.53  | 7.44  |
| 1625145 a at | FBgn0030749 | 9.35  | 9.2   | 9.36  | 9.02  | 9.37  | 9.21  |
| 1636843 a at | FBgn0037057 | 7.07  | 6.93  | 8.2   | 7.42  | 6.37  | 6.53  |
| 1624326 at   | FBgn0028406 | 9.21  | 9.07  | 8.71  | 9.02  | 9.29  | 9.25  |
| 1629411 at   | FBgn0037671 | 11.21 | 11.07 | 11.08 | 11.09 | 11.19 | 11.05 |
| 1631863 at   | FBgn0028387 | 8.15  | 8.01  | 7.82  | 8.06  | 8.18  | 8.02  |
| 1630844 at   | FBgn0028526 | 7.47  | 7.32  | 6.85  | 6.72  | 7.03  | 6.87  |
| 1626546 s at | FBgn0036769 | 10.85 | 10.7  | 10.67 | 10.21 | 10.85 | 10.83 |
| 1626248 at   | FBgn0037973 | 6.72  | 6.57  | 6.63  | 6.29  | 7.05  | 6.76  |
| 1629141 at   | FBgn0013984 | 7.53  | 7.39  | 7.39  | 7.15  | 7.23  | 7.33  |
| 1636575 s at | FBgn0033583 | 9.53  | 9.39  | 9.35  | 9.36  | 9.6   | 9.53  |
| 1634070 at   | FBgn0025558 | 8.43  | 8.29  | 8.05  | 8.42  | 8.42  | 8.14  |
| 1634033 s at | FBgn0025593 | 7.54  | 7.4   | 7.42  | 7.54  | 7.6   | 7.38  |
| 1623863 a at | ---         | 10.26 | 10.11 | 10.38 | 10.29 | 10.18 | 9.97  |
| 1639857 at   | FBgn0052068 | 9.97  | 9.82  | 10.01 | 10.25 | 9.91  | 9.81  |
| 1636717 at   | FBgn0038672 | 8.01  | 7.87  | 7.96  | 8.43  | 8.38  | 8.02  |
| 1625819 at   | FBgn0005410 | 9.23  | 9.09  | 9.1   | 8.98  | 9.03  | 9.05  |
| 1628399 s at | FBgn0004587 | 11.76 | 11.61 | 11.63 | 11.79 | 11.84 | 11.78 |
| 1625592 s at | FBgn0037106 | 9.46  | 9.32  | 9.03  | 9.4   | 9.49  | 9.39  |
| 1625096 at   | FBgn0036886 | 9.08  | 8.93  | 9.31  | 9.06  | 9.23  | 8.99  |
| 1628096 at   | FBgn0038472 | 8.37  | 8.23  | 8.31  | 8.72  | 8.73  | 8.65  |
| 1629546 at   | FBgn0038972 | 8.83  | 8.68  | 8.97  | 8.92  | 8.85  | 8.66  |
| 1637538 s at | FBgn0034618 | 9.45  | 9.31  | 9.46  | 9.6   | 9.56  | 9.24  |
| 1625122 at   | FBgn0039682 | 8.35  | 8.2   | 8.04  | 7.25  | 8.26  | 7.4   |
| 1627729 s at | FBgn0028577 | 9.65  | 9.5   | 9.29  | 9.41  | 9.46  | 9.29  |
| 1641653 at   | FBgn0024273 | 7.73  | 7.58  | 7.68  | 7.37  | 7.04  | 7.14  |
| 1641659 s at | FBgn0039697 | 11.73 | 11.58 | 11.74 | 11.82 | 11.8  | 11.67 |
| 1638501 at   | FBgn0036740 | 10.09 | 9.94  | 10.14 | 9.91  | 10.14 | 9.89  |

|              |                         |       |       |       |       |       |       |
|--------------|-------------------------|-------|-------|-------|-------|-------|-------|
| 1627124 at   | FBgn0030970             | 10.27 | 10.12 | 10.04 | 10.42 | 10.24 | 10.18 |
| 1633771 s at | FBgn0037391             | 7.74  | 7.59  | 8     | 7.74  | 7.57  | 7.37  |
| 1629842 at   | FBgn0004390             | 9.89  | 9.74  | 9.67  | 9.51  | 9.83  | 9.8   |
| 1630575 at   | FBgn0039674             | 9.46  | 9.31  | 9.48  | 9.67  | 9.5   | 9.28  |
| 1635203 at   | FBgn0040466             | 8.95  | 8.8   | 8.66  | 9.3   | 9.29  | 9.19  |
| 1641195 at   | FBgn0038519             | 10.42 | 10.27 | 10.66 | 10.48 | 10.54 | 10.4  |
| 1625717 s at | ---                     | 10.4  | 10.25 | 10.31 | 10.26 | 10.24 | 10.11 |
| 1639626 at   | FBgn0039215             | 8.7   | 8.55  | 8.51  | 8.56  | 8.73  | 8.69  |
| 1625638 a at | FBgn0001186             | 9.61  | 9.46  | 10    | 9.85  | 9.61  | 9.41  |
| 1626469 at   | FBgn0033351             | 10.21 | 10.06 | 10.17 | 10.34 | 10.43 | 10.16 |
| 1640963 at   | FBgn0052594 /// FBgn003 | 10.88 | 10.73 | 10.86 | 11.23 | 10.94 | 10.78 |
| 1631175 a at | FBgn0032681             | 7.56  | 7.41  | 8.01  | 7.04  | 6.84  | 7.23  |
| 1628706 at   | FBgn0030006             | 7.17  | 7.02  | 7.19  | 7.43  | 7.2   | 6.94  |
| 1635875 at   | FBgn0002791             | 8.78  | 8.63  | 8.82  | 8.94  | 8.72  | 8.61  |
| 1638600 at   | ---                     | 9.45  | 9.3   | 9.02  | 9.2   | 9.32  | 9.15  |
| 1627229 at   | FBgn0033433             | 7.39  | 7.24  | 7.03  | 7.19  | 7.48  | 7.29  |
| 1632263 at   | FBgn0033485             | 9.6   | 9.45  | 9.9   | 9.54  | 9.75  | 9.62  |
| 1630923 at   | FBgn0036476             | 7.22  | 7.06  | 7.49  | 7.88  | 7.51  | 7.29  |
| 1637637 at   | FBgn0003392             | 7.99  | 7.84  | 7.91  | 8.18  | 8.29  | 7.94  |
| 1629813 at   | FBgn0039993             | 11.08 | 10.93 | 10.88 | 10.91 | 11.1  | 11.03 |
| 1637018 at   | FBgn0030605             | 10.76 | 10.61 | 10.69 | 10.64 | 10.69 | 10.53 |
| 1631638 at   | FBgn0030964             | 9.75  | 9.6   | 9.49  | 9.29  | 9.52  | 9.54  |
| 1624719 at   | FBgn0029979             | 7.77  | 7.62  | 7.75  | 7.49  | 7.53  | 7.63  |
| 1624818 s at | FBgn0010591             | 9.67  | 9.52  | 9.74  | 9.65  | 9.65  | 9.37  |
| 1631499 a at | FBgn0003656             | 10.57 | 10.42 | 10.67 | 10.62 | 10.21 | 10.23 |
| 1626733 at   | FBgn0032487             | 9.42  | 9.26  | 9.47  | 9.4   | 9.13  | 9.07  |
| 1634359 a at | FBgn0032105             | 11.42 | 11.26 | 11.15 | 11.27 | 11.41 | 11.27 |
| 1640472 at   | FBgn0035114             | 11.69 | 11.53 | 10.63 | 10.41 | 11.04 | 11.25 |
| 1640984 s at | ---                     | 10.31 | 10.16 | 10.55 | 10.63 | 10.28 | 9.99  |
| 1632374 at   | FBgn0030878             | 9.46  | 9.31  | 9.61  | 9.41  | 9.48  | 9.32  |
| 1626475 at   | FBgn0032296             | 7.09  | 6.94  | 7.02  | 7.15  | 6.97  | 6.62  |
| 1625257 s at | FBgn0051523             | 9.31  | 9.16  | 9.32  | 8.95  | 9.25  | 9.5   |
| 1633752 at   | FBgn0052836             | 7.75  | 7.6   | 7.5   | 7.64  | 7.14  | 7.14  |
| 1623788 at   | FBgn0034432             | 10.4  | 10.25 | 10.58 | 10.55 | 10.48 | 10.11 |
| 1632807 at   | FBgn0040212             | 9.03  | 8.87  | 8.94  | 9.03  | 9.15  | 9.05  |
| 1631127 at   | FBgn0036848             | 8.97  | 8.82  | 9.1   | 9.05  | 9.09  | 8.91  |

|              |                         |       |       |       |       |       |       |
|--------------|-------------------------|-------|-------|-------|-------|-------|-------|
| 1634983 s at | FBgn0052521             | 7.88  | 7.73  | 8.36  | 8.26  | 8.37  | 8.28  |
| 1632275 a at | FBgn0032938             | 8.02  | 7.86  | 7.97  | 8.41  | 8.12  | 7.89  |
| 1635678 at   | FBgn0034897             | 9.02  | 8.86  | 8.86  | 8.97  | 9.04  | 8.76  |
| 1630845 at   | FBgn0003462             | 12.64 | 12.49 | 12.46 | 12.49 | 12.59 | 12.46 |
| 1639766 at   | FBgn0003075             | 11.54 | 11.39 | 11.28 | 11.58 | 11.51 | 11.15 |
| 1625632 at   | FBgn0024196             | 12.17 | 12.02 | 11.66 | 11.99 | 11.92 | 11.81 |
| 1632488 a at | FBgn0053009             | 9.77  | 9.61  | 9.85  | 9.54  | 9.72  | 9.55  |
| 1633792 a at | FBgn0003013             | 7.93  | 7.77  | 7.92  | 7.65  | 7.88  | 8.04  |
| 1630403 s at | FBgn0037341             | 8.3   | 8.15  | 8.07  | 8.14  | 8.29  | 8.11  |
| 1641251 at   | FBgn0035754             | 8.47  | 8.31  | 7.94  | 8.48  | 8.35  | 8.14  |
| 1625992 s at | FBgn0035075             | 8.29  | 8.14  | 8.21  | 8.31  | 8.45  | 8.17  |
| 1638898 at   | ---                     | 9.33  | 9.18  | 9.07  | 9.39  | 9.42  | 9.28  |
| 1640907 at   | FBgn0001091             | 12.21 | 12.06 | 12.07 | 12.23 | 12.31 | 12.03 |
| 1630630 at   | FBgn0034278 /// FBgn003 | 10.55 | 10.4  | 10.66 | 10.47 | 10.53 | 10.37 |
| 1640650 at   | FBgn0024957             | 9     | 8.85  | 8.77  | 9.02  | 8.96  | 8.54  |
| AFFX-Dros-e  | FBgn0001942             | 12.8  | 12.64 | 12.76 | 12.58 | 12.86 | 12.65 |
| 1627856 at   | FBgn0026417             | 7.81  | 7.66  | 7.97  | 8.04  | 7.49  | 7.32  |
| 1632142 at   | FBgn0033571             | 10.41 | 10.25 | 10.3  | 10.82 | 10.56 | 10.25 |
| 1626806 at   | FBgn0003741             | 8.46  | 8.3   | 8.61  | 8.34  | 8.5   | 8.34  |
| 1634824 a at | FBgn0029941             | 10.71 | 10.55 | 10.32 | 10.49 | 10.61 | 10.46 |
| 1626405 at   | FBgn0024732             | 8.68  | 8.52  | 8.24  | 9.24  | 8.76  | 8.63  |
| 1636186 s at | FBgn0015221             | 12.15 | 11.99 | 12    | 11.85 | 12.08 | 12.01 |
| 1641330 at   | FBgn0052212             | 8.26  | 8.1   | 7.7   | 7.62  | 7.88  | 7.9   |
| 1640247 at   | FBgn0036666             | 9.5   | 9.34  | 9.47  | 9.29  | 9.39  | 9.23  |
| 1637608 at   | FBgn0030057             | 8.73  | 8.57  | 8.6   | 8.65  | 8.53  | 8.38  |
| 1632517 at   | FBgn0038115             | 8.29  | 8.13  | 8.09  | 8.18  | 7.78  | 7.6   |
| 1637978 at   | FBgn0032790             | 8.64  | 8.49  | 8.35  | 8.36  | 8.63  | 8.39  |
| 1629104 at   | FBgn0029997             | 8.2   | 8.04  | 8.26  | 8.34  | 8.19  | 8.01  |
| 1640321 at   | ---                     | 7.16  | 7.01  | 7.31  | 6.82  | 6.89  | 6.76  |
| 1630174 s at | FBgn0032195             | 8.42  | 8.27  | 8.48  | 8.45  | 8.44  | 8.35  |
| 1635428 at   | FBgn0033948             | 8.75  | 8.59  | 8.32  | 8.71  | 8.92  | 8.84  |
| 1630530 at   | FBgn0032059             | 8.68  | 8.52  | 8.64  | 8.88  | 9.07  | 8.78  |
| 1633011 at   | FBgn0001994             | 7.6   | 7.44  | 7.53  | 7.56  | 7.46  | 7.6   |
| 1629942 at   | ---                     | 9.79  | 9.63  | 9.78  | 9.87  | 9.92  | 9.96  |
| 1624021 a at | FBgn0001624             | 9.23  | 9.07  | 9.04  | 8.92  | 9.1   | 9.14  |
| 1627550 a at | FBgn0052587             | 8.88  | 8.72  | 8.83  | 8.34  | 8.51  | 8.56  |

|              |             |       |       |       |       |       |       |
|--------------|-------------|-------|-------|-------|-------|-------|-------|
| 1626218 s at | FBgn0011818 | 9.4   | 9.24  | 8.94  | 9.01  | 9.3   | 8.98  |
| 1631040 at   | FBgn0036302 | 8.92  | 8.76  | 8.82  | 9     | 8.98  | 8.63  |
| 1624065 at   | FBgn0003514 | 10.79 | 10.63 | 10.96 | 10.66 | 10.61 | 10.59 |
| 1623287 at   | FBgn0035267 | 8.55  | 8.39  | 8.59  | 8.67  | 8.36  | 8.43  |
| 1627788 at   | FBgn0037943 | 8.78  | 8.62  | 8.85  | 8.66  | 8.68  | 8.65  |
| 1627511 at   | FBgn0036165 | 8.44  | 8.28  | 8.4   | 8.31  | 8.72  | 8.71  |
| 1639524 at   | FBgn0034378 | 9.58  | 9.42  | 9.08  | 9     | 9.26  | 9.34  |
| 1627267 at   | FBgn0032694 | 8.23  | 8.07  | 8.42  | 8.38  | 7.76  | 8.03  |
| 1632973 at   | FBgn0002781 | 8.21  | 8.05  | 7.71  | 7.98  | 8.24  | 7.99  |
| 1625551 at   | FBgn0028426 | 7.25  | 7.09  | 7.53  | 7.59  | 7.55  | 7.23  |
| 1641737 a at | FBgn0027616 | 7.05  | 6.89  | 6.41  | 6.97  | 6.8   | 6.8   |
| 1632971 at   | ---         | 8.84  | 8.68  | 8.83  | 8.55  | 9.02  | 8.78  |
| 1637798 at   | FBgn0030451 | 10.15 | 9.99  | 10.13 | 10.09 | 10.09 | 9.87  |
| 1628423 at   | FBgn0027541 | 9.45  | 9.28  | 9.2   | 9.35  | 9.46  | 9.24  |
| 1637705 at   | FBgn0005427 | 8.62  | 8.46  | 8.68  | 8.43  | 8.25  | 8.49  |
| 1640457 s at | ---         | 7.78  | 7.62  | 8.56  | 8.58  | 8.09  | 7.64  |
| 1627239 s at | FBgn0033837 | 8.11  | 7.95  | 7.87  | 7.84  | 8.09  | 8.11  |
| 1627612 a at | FBgn0025864 | 9.88  | 9.71  | 9.75  | 9.92  | 9.88  | 9.67  |
| 1630031 at   | FBgn0002590 | 13.11 | 12.95 | 13.32 | 13.02 | 13.2  | 13.03 |
| 1622941 at   | FBgn0033529 | 10.58 | 10.41 | 10.7  | 10.61 | 10.7  | 10.53 |
| 1624727 s at | FBgn0016756 | 9.38  | 9.22  | 9.32  | 9.23  | 9.37  | 9.16  |
| 1633599 a at | FBgn0003067 | 7.63  | 7.46  | 7.05  | 6.27  | 7.43  | 6.23  |
| 1622995 at   | ---         | 9.26  | 9.1   | 9.36  | 9.17  | 9.33  | 9.15  |
| 1635542 at   | ---         | 10.79 | 10.62 | 10.5  | 10.46 | 10.62 | 10.57 |
| 1632415 s at | FBgn0036534 | 8.09  | 7.92  | 8.03  | 8.04  | 7.88  | 7.84  |
| 1624037 s at | FBgn0010280 | 8.98  | 8.82  | 9.11  | 8.96  | 8.86  | 8.99  |
| 1637467 at   | FBgn0038047 | 6.87  | 6.71  | 6.62  | 6.69  | 7.34  | 6.76  |
| 1628589 at   | ---         | 11.61 | 11.45 | 11.63 | 11.71 | 11.75 | 11.5  |
| 1640009 at   | FBgn0010812 | 7.47  | 7.3   | 7.63  | 7.58  | 7.68  | 7.23  |
| 1638796 at   | FBgn0038723 | 10.18 | 10.01 | 10.02 | 10.02 | 10.08 | 9.86  |
| 1637982 at   | FBgn0016687 | 11.65 | 11.48 | 11.72 | 11.88 | 11.93 | 11.58 |
| 1638092 a at | FBgn0038369 | 9.75  | 9.58  | 9.67  | 9.56  | 9.76  | 9.58  |
| 1624300 s at | FBgn0011817 | 9.91  | 9.74  | 9.24  | 9.77  | 9.82  | 9.66  |
| 1637172 at   | FBgn0044030 | 10.27 | 10.1  | 10.02 | 10.06 | 10.11 | 10.05 |
| 1633025 at   | FBgn0033808 | 8.87  | 8.7   | 8.78  | 8.86  | 8.94  | 8.69  |
| 1640998 at   | FBgn0004811 | 7.54  | 7.37  | 7.45  | 7.83  | 7.72  | 7.54  |



|              |                         |       |       |       |       |       |       |
|--------------|-------------------------|-------|-------|-------|-------|-------|-------|
| 1639430 at   | FBgn0038908             | 8.43  | 8.26  | 8.56  | 8.75  | 8.49  | 8.29  |
| 1638359 s at | FBgn0028953             | 7.14  | 6.98  | 7.44  | 6.8   | 6.71  | 7     |
| 1636883 s at | FBgn0004362             | 11.23 | 11.06 | 11.08 | 11.18 | 10.96 | 11.03 |
| 1637302 s at | ---                     | 8.57  | 8.4   | 8.71  | 8.3   | 7.86  | 8.06  |
| 1637383 at   | FBgn0039249             | 6.88  | 6.71  | 7.01  | 6.56  | 7.02  | 6.72  |
| 1628952 s at | FBgn0004509             | 8.75  | 8.58  | 8.52  | 8.63  | 8.68  | 8.46  |
| 1628738 at   | FBgn0051251             | 7.85  | 7.69  | 7.52  | 8.07  | 8.03  | 7.94  |
| 1634164 at   | ---                     | 10.77 | 10.6  | 10.04 | 10.37 | 10.3  | 10.23 |
| 1634100 at   | FBgn0039965             | 9.98  | 9.81  | 9.78  | 10.06 | 10.04 | 9.85  |
| 1624837 at   | FBgn0035805             | 8.77  | 8.6   | 9.12  | 8.93  | 8.74  | 8.53  |
| 1628618 at   | FBgn0030669             | 9.35  | 9.19  | 9.15  | 9.29  | 9.47  | 9.21  |
| 1635566 s at | FBgn0027338             | 8.11  | 7.94  | 7.47  | 7.59  | 7.41  | 7.27  |
| 1638485 s at | FBgn0034371             | 8.56  | 8.39  | 8.29  | 8.43  | 8.7   | 8.44  |
| 1640220 a at | FBgn0038683             | 9.43  | 9.26  | 9.16  | 9.27  | 9.2   | 9.12  |
| 1636978 at   | FBgn0032600             | 9.9   | 9.73  | 9.79  | 9.77  | 9.95  | 9.9   |
| 1630795 at   | FBgn0030037             | 9.61  | 9.44  | 9.65  | 9.72  | 9.71  | 9.5   |
| 1633798 at   | FBgn0022959             | 10.87 | 10.7  | 11.02 | 10.9  | 10.98 | 10.68 |
| 1627376 at   | FBgn0014018             | 9.05  | 8.88  | 9.06  | 8.99  | 9.07  | 8.77  |
| 1632525 at   | FBgn0038191             | 10.02 | 9.85  | 10.01 | 9.94  | 9.95  | 9.78  |
| 1631093 at   | FBgn0039627             | 8.71  | 8.54  | 8.9   | 8.68  | 8.84  | 8.72  |
| 1625134 at   | FBgn0039044             | 9.21  | 9.04  | 9.07  | 8.99  | 9.27  | 9.11  |
| 1639803 at   | FBgn0036576             | 8.12  | 7.95  | 7.81  | 7.54  | 7.92  | 7.64  |
| 1639484 at   | FBgn0039854             | 8.66  | 8.49  | 8.85  | 8.72  | 8.87  | 8.56  |
| 1626675 at   | ---                     | 7.62  | 7.45  | 7.73  | 8.13  | 7.87  | 7.54  |
| 1629537 s at | FBgn0050394             | 7.34  | 7.17  | 7.53  | 7.18  | 7.26  | 7.22  |
| 1625126 at   | FBgn0027522             | 8.25  | 8.08  | 8.24  | 8.27  | 8.24  | 8.04  |
| 1626725 at   | FBgn0034936 /// FBgn003 | 9.55  | 9.38  | 9.58  | 9.54  | 9.56  | 9.37  |
| 1639600 at   | FBgn0035248             | 7.54  | 7.37  | 7.58  | 7.42  | 7.54  | 7.52  |
| 1635563 at   | FBgn0035900             | 7.02  | 6.84  | 6.93  | 6.65  | 6.46  | 6.43  |
| 1629525 at   | FBgn0034543             | 8.71  | 8.54  | 8.65  | 8.6   | 8.61  | 8.51  |
| 1630469 a at | FBgn0037470             | 10.14 | 9.97  | 9.77  | 9.79  | 9.92  | 9.8   |
| 1625680 a at | FBgn0032455             | 10.79 | 10.62 | 10.57 | 10.95 | 10.89 | 10.65 |
| 1634374 at   | FBgn0053138             | 10.33 | 10.15 | 10.13 | 10.52 | 10.3  | 9.82  |
| 1625414 at   | FBgn0001941             | 10.45 | 10.28 | 10.18 | 10.27 | 10.29 | 10.3  |
| 1626575 at   | FBgn0030286             | 8.64  | 8.47  | 8.4   | 8.38  | 8.73  | 8.45  |
| 1632556 s at | FBgn0039665             | 9.49  | 9.31  | 9.06  | 9.1   | 9.6   | 9.42  |

|              |             |       |       |       |       |       |       |
|--------------|-------------|-------|-------|-------|-------|-------|-------|
| 1633382 s at | FBgn0027529 | 7.5   | 7.32  | 7.63  | 7.35  | 7.14  | 7.25  |
| 1638609 s at | FBgn0038016 | 9     | 8.82  | 9.03  | 8.92  | 9.09  | 8.76  |
| 1627287 at   | FBgn0029831 | 8.07  | 7.89  | 8.14  | 8.41  | 8.72  | 8.39  |
| 1627627 at   | FBgn0032822 | 8.42  | 8.25  | 8.26  | 8.56  | 8.32  | 8.14  |
| 1633021 s at | FBgn0010905 | 9.59  | 9.42  | 9.5   | 9.38  | 9.72  | 9.59  |
| 1629176 at   | FBgn0032841 | 9.58  | 9.4   | 9.55  | 8.75  | 9.33  | 9.16  |
| 1639566 s at | ---         | 8.05  | 7.88  | 8.41  | 7.42  | 7.85  | 7.93  |
| 1633231 a at | FBgn0026758 | 9.23  | 9.05  | 8.96  | 8.92  | 8.95  | 8.73  |
| 1640267 at   | FBgn0038454 | 7.83  | 7.65  | 7.69  | 7.66  | 7.77  | 7.81  |
| 1623312 s at | FBgn0039272 | 10.03 | 9.85  | 9.7   | 9.91  | 9.92  | 9.71  |
| 1639972 at   | FBgn0004087 | 10.67 | 10.49 | 10.35 | 10.72 | 10.47 | 10.14 |
| 1635429 at   | ---         | 9.93  | 9.76  | 9.92  | 10.04 | 10.05 | 9.97  |
| 1636559 s at | FBgn0029134 | 12.53 | 12.36 | 12.22 | 12.56 | 12.46 | 12.14 |
| 1637663 at   | FBgn0003687 | 9.36  | 9.19  | 8.98  | 9     | 9.48  | 9.3   |
| 1641396 a at | ---         | 10.25 | 10.07 | 10.14 | 10.08 | 10.25 | 10.11 |
| 1639954 at   | FBgn0032261 | 8.67  | 8.49  | 8.92  | 8.81  | 8.56  | 8.38  |
| 1634798 at   | FBgn0022246 | 8.45  | 8.27  | 8.64  | 8.52  | 8.36  | 8.25  |
| 1640924 a at | FBgn0025681 | 8.88  | 8.7   | 8.51  | 8.55  | 8.81  | 8.75  |
| 1625857 at   | FBgn0031998 | 9.34  | 9.16  | 9.14  | 8.65  | 9.21  | 9.15  |
| 1636182 a at | FBgn0036317 | 7.77  | 7.59  | 7.51  | 7.7   | 7.89  | 7.64  |
| 1625464 at   | FBgn0029870 | 10.34 | 10.16 | 10.2  | 10.18 | 10.37 | 10.15 |
| 1639619 a at | FBgn0028516 | 9.29  | 9.11  | 9.66  | 9.3   | 9.13  | 9.2   |
| 1637643 at   | FBgn0032117 | 6.77  | 6.59  | 7.01  | 6.78  | 7.07  | 6.96  |
| 1632267 a at | FBgn0032198 | 11.94 | 11.76 | 12.04 | 11.74 | 11.95 | 11.8  |
| 1632259 at   | FBgn0037971 | 9.74  | 9.56  | 9.18  | 9.45  | 9.44  | 9.36  |
| 1627448 at   | FBgn0033428 | 10.39 | 10.21 | 10.43 | 10.43 | 10.3  | 10.04 |
| 1641541 a at | FBgn0039969 | 11.49 | 11.31 | 11.45 | 11.23 | 11.58 | 11.42 |
| 1629559 s at | ---         | 7.66  | 7.48  | 7.81  | 6.97  | 7.25  | 7.35  |
| 1630025 at   | FBgn0023526 | 8.88  | 8.7   | 8.81  | 8.74  | 8.79  | 8.67  |
| 1640510 at   | FBgn0035765 | 11.1  | 10.92 | 10.89 | 10.83 | 11.04 | 11    |
| 1640300 at   | ---         | 7.01  | 6.82  | 7.01  | 6.97  | 6.77  | 6.62  |
| AFFX-r2-Dro  | FBgn0001128 | 10.59 | 10.41 | 10.23 | 10.19 | 10.77 | 10.51 |
| 1628726 s at | FBgn0026376 | 9.54  | 9.35  | 9.1   | 9.23  | 9.24  | 9.47  |
| 1634021 a at | FBgn0014870 | 7.18  | 7     | 7.84  | 7.15  | 6.94  | 7.04  |
| 1636647 s at | ---         | 10.33 | 10.15 | 10.56 | 10.64 | 10.47 | 10.1  |
| 1632479 at   | FBgn0040623 | 10.38 | 10.2  | 10.19 | 9.92  | 10.16 | 10.11 |

|              |             |       |       |       |       |       |       |
|--------------|-------------|-------|-------|-------|-------|-------|-------|
| 1632191 s at | FBgn0004873 | 7.21  | 7.02  | 7.83  | 7.41  | 7.16  | 6.91  |
| 1633956 s at | FBgn0035266 | 9.92  | 9.74  | 9.79  | 9.7   | 10.07 | 9.95  |
| 1625315 at   | FBgn0037011 | 9.35  | 9.17  | 9.49  | 9.14  | 9.16  | 9.04  |
| 1635637 at   | FBgn0037609 | 9.4   | 9.22  | 8.97  | 9.25  | 9.49  | 9.25  |
| 1633690 at   | FBgn0033903 | 7.36  | 7.17  | 7.81  | 7.53  | 7.34  | 7.38  |
| 1629479 a at | FBgn0020303 | 11.63 | 11.45 | 11.7  | 11.27 | 11.5  | 11.37 |
| 1624164 s at | FBgn0036144 | 7.02  | 6.83  | 6.78  | 6.86  | 6.61  | 7.03  |
| 1639061 at   | FBgn0034975 | 8.06  | 7.87  | 7.94  | 7.73  | 7.92  | 7.83  |
| 1624560 at   | FBgn0020254 | 9.6   | 9.41  | 9.27  | 9.04  | 9.12  | 9.48  |
| 1635581 at   | FBgn0029937 | 8.1   | 7.91  | 7.98  | 8.24  | 8.21  | 7.98  |
| 1635393 s at | FBgn0000568 | 7.12  | 6.93  | 7.05  | 6.22  | 6.62  | 6.27  |
| 1633931 a at | FBgn0027779 | 10.69 | 10.5  | 10.6  | 10.41 | 10.73 | 10.46 |
| 1638947 at   | FBgn0031651 | 9.3   | 9.11  | 9.4   | 9.34  | 9.29  | 9.16  |
| 1628229 at   | FBgn0028990 | 8.82  | 8.64  | 8.58  | 8.71  | 8.91  | 8.64  |
| 1630080 at   | FBgn0035997 | 10.37 | 10.19 | 10.32 | 10.25 | 10.35 | 10.26 |
| 1625443 a at | FBgn0053054 | 7.96  | 7.77  | 7.99  | 8     | 7.65  | 7.53  |
| 1636406 at   | FBgn0034643 | 8.7   | 8.52  | 8.72  | 8.57  | 8.91  | 8.73  |
| 1634135 at   | FBgn0035444 | 9.25  | 9.06  | 9.13  | 9.2   | 9.31  | 9.06  |
| 1633911 a at | FBgn0051550 | 8.33  | 8.15  | 8.28  | 8.07  | 8.03  | 7.94  |
| 1624244 at   | FBgn0015806 | 8.71  | 8.53  | 9.09  | 8.61  | 8.35  | 8.54  |
| 1625340 at   | FBgn0004227 | 8.27  | 8.09  | 8.06  | 7.66  | 7.87  | 8.19  |
| 1624530 at   | FBgn0036980 | 11.17 | 10.98 | 10.78 | 10.83 | 11.05 | 10.98 |
| 1634245 at   | ---         | 7.05  | 6.86  | 7.43  | 7.65  | 7.18  | 7.02  |
| 1630440 at   | FBgn0036916 | 8.37  | 8.18  | 8.73  | 8.5   | 8.59  | 8.43  |
| 1632728 at   | ---         | 8.52  | 8.33  | 8.54  | 8.47  | 8.73  | 8.65  |
| 1624340 at   | ---         | 9.85  | 9.66  | 9.76  | 9.73  | 9.88  | 9.58  |
| 1639211 at   | ---         | 10.78 | 10.6  | 9.59  | 9.76  | 10.33 | 10.15 |
| 1626271 at   | FBgn0027528 | 7.17  | 6.98  | 7.73  | 7.39  | 7.39  | 7.24  |
| 1623594 at   | FBgn0004133 | 7.05  | 6.86  | 7.24  | 6.76  | 6.51  | 6.52  |
| 1639245 x at | FBgn0004657 | 9.31  | 9.13  | 9.22  | 8.85  | 9.2   | 9.37  |
| 1640322 at   | FBgn0033580 | 7.06  | 6.87  | 6.97  | 6.91  | 7.13  | 7.01  |
| 1627782 at   | ---         | 8.67  | 8.48  | 8.93  | 8.61  | 8.58  | 8.34  |
| 1629101 a at | FBgn0033019 | 9.97  | 9.78  | 9.62  | 9.46  | 10.04 | 9.86  |
| 1634302 s at | FBgn0039640 | 10.75 | 10.57 | 10.91 | 11.09 | 10.78 | 10.59 |
| 1625844 s at | FBgn0015903 | 7.32  | 7.13  | 7.03  | 7.12  | 7.18  | 7.08  |
| 1641000 a at | FBgn0033844 | 9.73  | 9.54  | 9.72  | 9.52  | 9.53  | 9.48  |

|              |             |       |       |       |       |       |       |
|--------------|-------------|-------|-------|-------|-------|-------|-------|
| 1626769 s at | FBgn0033224 | 9.5   | 9.31  | 9.44  | 9.59  | 9.51  | 9.36  |
| 1629903 at   | ---         | 10.38 | 10.19 | 10.38 | 10.61 | 10.69 | 10.25 |
| 1628516 at   | FBgn0031603 | 7.51  | 7.32  | 7.59  | 7.43  | 7.56  | 7.31  |
| 1624183 a at | FBgn0000634 | 10.4  | 10.21 | 10.17 | 10.21 | 10.18 | 10.14 |
| 1626236 at   | FBgn0032703 | 9.41  | 9.22  | 9.39  | 9.27  | 9.31  | 9.17  |
| 1641747 s at | FBgn0033010 | 9.27  | 9.08  | 8.82  | 8.81  | 8.95  | 9.08  |
| 1634218 at   | FBgn0038828 | 10.34 | 10.15 | 9.68  | 9.77  | 10.19 | 10.2  |
| 1629388 s at | FBgn0039745 | 9.39  | 9.2   | 9.38  | 9.19  | 9.33  | 9.15  |
| 1634321 s at | FBgn0037376 | 8.98  | 8.79  | 8.58  | 8.91  | 9.31  | 9.07  |
| 1640841 at   | FBgn0004177 | 10.71 | 10.52 | 10.86 | 11.02 | 10.7  | 10.6  |
| 1637223 s at | FBgn0034504 | 9.51  | 9.32  | 9.47  | 9.26  | 9.27  | 9.21  |
| 1625249 at   | FBgn0030090 | 9.18  | 8.99  | 8.94  | 8.86  | 9.05  | 8.81  |
| 1631205 a at | FBgn0036182 | 12.1  | 11.91 | 11.82 | 12.1  | 12.32 | 12    |
| 1627265 at   | FBgn0035202 | 7.96  | 7.77  | 7.55  | 8.21  | 8.04  | 7.83  |
| 1631355 at   | ---         | 9.28  | 9.09  | 9.41  | 9.28  | 9.36  | 9.1   |
| 1624715 at   | FBgn0011361 | 10.98 | 10.79 | 11.15 | 11.13 | 10.91 | 10.75 |
| 1633795 a at | ---         | 7.49  | 7.3   | 7.9   | 6.26  | 6.42  | 6.94  |
| 1638839 at   | FBgn0033998 | 9.53  | 9.34  | 9.4   | 9.45  | 9.48  | 9.33  |
| 1626760 at   | FBgn0030178 | 8.32  | 8.12  | 8.35  | 8.55  | 8.52  | 8.26  |
| 1633563 at   | FBgn0030245 | 7.69  | 7.5   | 8.35  | 8.1   | 7.73  | 7.55  |
| 1631083 at   | FBgn0029609 | 9.29  | 9.09  | 8.98  | 8.91  | 9.18  | 9.04  |
| 1626710 at   | ---         | 8.39  | 8.2   | 8.29  | 8.62  | 8.6   | 8.32  |
| 1625131 s at | FBgn0005671 | 11.36 | 11.16 | 11.34 | 11.24 | 11.53 | 11.33 |
| AFFX-BioDn   | ---         | 12.6  | 12.4  | 12.59 | 12.69 | 12.37 | 12.05 |
| 1634015 s at | FBgn0038786 | 9.81  | 9.61  | 9.65  | 9.48  | 9.58  | 9.59  |
| 1635788 a at | FBgn0037847 | 10.56 | 10.37 | 10.29 | 10.36 | 10.45 | 10.33 |
| 1640549 at   | FBgn0023477 | 11.37 | 11.18 | 11.11 | 11.23 | 10.98 | 10.89 |
| 1639259 at   | FBgn0033637 | 8.47  | 8.28  | 8.56  | 8.57  | 8.67  | 8.19  |
| 1641704 at   | ---         | 8.85  | 8.66  | 8.72  | 8.76  | 8.84  | 8.7   |
| 1628336 a at | FBgn0010238 | 10.02 | 9.82  | 10.13 | 9.93  | 10.02 | 10.11 |
| 1632858 a at | FBgn0037362 | 8.96  | 8.77  | 8.89  | 8.63  | 8.83  | 8.72  |
| 1626436 at   | FBgn0035035 | 9.32  | 9.12  | 9.27  | 9.57  | 9.32  | 9.25  |
| 1626375 a at | FBgn0029711 | 8.18  | 7.99  | 7.89  | 8     | 8.26  | 8.23  |
| 1633283 at   | FBgn0037899 | 12.35 | 12.15 | 12.3  | 12.38 | 12.49 | 12.09 |
| 1628842 s at | FBgn0039928 | 8.3   | 8.11  | 8.76  | 7.96  | 8.1   | 8.41  |
| 1638797 a at | FBgn0037308 | 11.03 | 10.84 | 10.83 | 10.85 | 11.02 | 10.91 |

|              |             |       |       |       |       |       |       |
|--------------|-------------|-------|-------|-------|-------|-------|-------|
| 1633016 a at | FBgn0003520 | 8.85  | 8.66  | 8.17  | 8.14  | 8.58  | 8.45  |
| 1639064 s at | FBgn0010379 | 8.98  | 8.79  | 8.89  | 8.85  | 9     | 9.28  |
| 1631300 at   | FBgn0010383 | 8.63  | 8.44  | 8.99  | 8.29  | 7.84  | 8.24  |
| 1638133 at   | FBgn0022984 | 9.33  | 9.14  | 9.24  | 8.92  | 9.02  | 9.06  |
| 1641118 at   | FBgn0029155 | 9.39  | 9.19  | 9.18  | 9.04  | 9.3   | 9.17  |
| 1624400 a at | FBgn0013435 | 7.25  | 7.06  | 7.12  | 7.38  | 7.32  | 7.06  |
| 1630110 at   | FBgn0033547 | 8.74  | 8.54  | 8.66  | 8.58  | 8.89  | 8.62  |
| 1630324 at   | FBgn0034119 | 9.07  | 8.87  | 9.29  | 9.16  | 9.15  | 8.87  |
| 1634131 s at | FBgn0023215 | 8.34  | 8.14  | 8.58  | 8.56  | 8.17  | 7.96  |
| 1635737 at   | FBgn0033889 | 9.75  | 9.55  | 9.85  | 9.75  | 9.65  | 9.47  |
| 1641463 at   | FBgn0032420 | 9.54  | 9.34  | 9.48  | 9.82  | 9.49  | 9.44  |
| 1633349 at   | FBgn0010421 | 10.46 | 10.26 | 10.12 | 10.39 | 10.58 | 10.36 |
| 1640266 a at | FBgn0034421 | 9.2   | 9     | 9.27  | 9.04  | 9.22  | 9.13  |
| 1634444 at   | FBgn0033184 | 9.19  | 9     | 9.28  | 9.13  | 9.04  | 8.89  |
| 1637280 at   | FBgn0039363 | 8.71  | 8.51  | 8.77  | 8.77  | 8.51  | 8.45  |
| 1631535 at   | FBgn0004397 | 9.34  | 9.14  | 9.11  | 9.14  | 9.24  | 9.09  |
| 1639736 at   | FBgn0030851 | 8.8   | 8.6   | 8.69  | 8.66  | 8.94  | 8.75  |
| 1631853 at   | ---         | 10.74 | 10.54 | 10.62 | 10.7  | 10.84 | 10.67 |
| 1637036 s at | FBgn0003141 | 9.65  | 9.45  | 9.74  | 9.73  | 9.73  | 9.71  |
| 1640134 a at | FBgn0032388 | 9.36  | 9.16  | 9.51  | 9.33  | 9.3   | 9.11  |
| 1640256 at   | FBgn0000171 | 9.46  | 9.26  | 9.64  | 9.19  | 9.07  | 9.01  |
| 1629705 at   | FBgn0036182 | 11.4  | 11.2  | 11.32 | 11.79 | 11.99 | 11.78 |
| 1641430 at   | FBgn0034879 | 9.28  | 9.08  | 9.44  | 9.31  | 9.39  | 9.11  |
| 1625424 at   | FBgn0037949 | 7.95  | 7.75  | 7.33  | 7.47  | 7.76  | 7.76  |
| 1624595 a at | FBgn0010256 | 8.93  | 8.73  | 8.51  | 8.78  | 9.23  | 8.9   |
| 1635448 at   | FBgn0005322 | 10.96 | 10.76 | 10.89 | 10.88 | 10.93 | 10.77 |
| 1629189 at   | FBgn0031537 | 8.15  | 7.95  | 7.9   | 8.17  | 8.06  | 7.55  |
| 1633576 s at | FBgn0022349 | 10.65 | 10.45 | 10.46 | 10.23 | 10.51 | 10.38 |
| 1629013 at   | FBgn0029713 | 8.12  | 7.92  | 7.86  | 8.13  | 8.23  | 8.03  |
| 1634628 at   | FBgn0050392 | 10.23 | 10.03 | 9.76  | 10.03 | 10.2  | 9.76  |
| 1634495 s at | FBgn0005630 | 8.55  | 8.34  | 8.06  | 8.46  | 8.81  | 8.43  |
| 1634649 at   | FBgn0004657 | 8.75  | 8.55  | 8.71  | 8.51  | 8.66  | 8.79  |
| 1624153 at   | FBgn0035083 | 10.92 | 10.72 | 10.99 | 11.11 | 10.58 | 10.55 |
| 1638173 s at | FBgn0031637 | 7.7   | 7.5   | 7.66  | 7.57  | 7.35  | 7.25  |
| 1623015 at   | FBgn0038609 | 9.74  | 9.54  | 9.38  | 9.88  | 9.7   | 9.4   |
| 1629676 at   | FBgn0028684 | 10.73 | 10.52 | 10.65 | 10.7  | 10.78 | 10.58 |

|              |                         |       |       |       |       |       |       |
|--------------|-------------------------|-------|-------|-------|-------|-------|-------|
| 1630286 at   | FBgn0000083             | 9.93  | 9.73  | 9.5   | 9.41  | 9.59  | 9.38  |
| 1628001 at   | FBgn0032748             | 10.53 | 10.33 | 10.2  | 10.08 | 10.48 | 10.45 |
| 1637414 at   | FBgn0028506             | 10.04 | 9.83  | 9.82  | 9.78  | 10.02 | 9.89  |
| 1627023 at   | FBgn0039565             | 9.81  | 9.61  | 9.49  | 9.81  | 9.64  | 9.54  |
| 1633681 at   | FBgn0037336             | 9.06  | 8.85  | 8.99  | 8.69  | 8.57  | 8.69  |
| 1629281 at   | ---                     | 8.83  | 8.62  | 8.77  | 9.27  | 8.96  | 8.7   |
| 1628358 at   | FBgn0028397             | 7.87  | 7.67  | 8.36  | 8.5   | 8.04  | 7.68  |
| 1640835 a at | ---                     | 11.13 | 10.93 | 11.2  | 11.17 | 11.1  | 10.9  |
| 1635819 at   | FBgn0014388             | 7.06  | 6.85  | 7.56  | 6.69  | 6.79  | 6.85  |
| 1629938 at   | ---                     | 8.88  | 8.67  | 8.52  | 8.36  | 8.85  | 8.62  |
| 1635291 a at | FBgn0017453             | 8.66  | 8.46  | 8.47  | 8.56  | 8.59  | 8.47  |
| 1631937 at   | FBgn0051755             | 8.54  | 8.34  | 8.2   | 8.67  | 8.21  | 8.1   |
| 1634443 a at | FBgn0016700             | 9.33  | 9.12  | 8.95  | 8.97  | 8.82  | 8.65  |
| 1635281 at   | FBgn0033350             | 8.43  | 8.23  | 8.33  | 8.32  | 8.51  | 8.33  |
| 1626676 at   | FBgn0025740             | 9.32  | 9.11  | 8.98  | 8.74  | 9.02  | 9.18  |
| 1625265 at   | FBgn0035189             | 7.3   | 7.09  | 7.59  | 7.39  | 6.92  | 6.71  |
| 1628584 at   | FBgn0036910             | 8.07  | 7.86  | 7.59  | 7.27  | 7.01  | 7.63  |
| 1632497 a at | ---                     | 7.76  | 7.55  | 7.92  | 7.11  | 6.98  | 7.35  |
| 1622947 s at | FBgn0004363             | 12.72 | 12.51 | 12.48 | 12.57 | 12.51 | 12.31 |
| 1639851 at   | FBgn0040798             | 7.28  | 7.07  | 6.46  | 6.23  | 6.82  | 7     |
| 1638678 at   | FBgn0034223             | 9.67  | 9.46  | 9.59  | 9.82  | 9.67  | 9.5   |
| 1636521 at   | FBgn0026869             | 8.77  | 8.56  | 8.7   | 8.74  | 8.48  | 8.41  |
| 1628583 at   | FBgn0051687             | 7.66  | 7.45  | 7.54  | 7.93  | 7.77  | 7.35  |
| 1639188 at   | FBgn0038877             | 9.12  | 8.91  | 8.87  | 8.5   | 8.98  | 8.83  |
| 1639882 at   | FBgn0037719             | 8.84  | 8.63  | 8.76  | 8.78  | 8.93  | 8.81  |
| 1639653 at   | FBgn0036756             | 7.75  | 7.54  | 7.88  | 7.12  | 6.78  | 7.22  |
| 1627803 at   | FBgn0039301             | 9.48  | 9.28  | 9.46  | 9.78  | 9.62  | 9.34  |
| 1626492 s at | FBgn0001961             | 8.9   | 8.69  | 8.93  | 8.61  | 8.8   | 8.64  |
| AFFX-r2-Ec-l | ---                     | 12.98 | 12.77 | 13.02 | 13.22 | 12.75 | 12.43 |
| 1637983 s at | FBgn0039109             | 9.05  | 8.84  | 9.27  | 8.88  | 8.92  | 8.98  |
| 1640363 a at | FBgn0039464             | 9.28  | 9.07  | 9.32  | 9.88  | 9.83  | 9.4   |
| 1628363 at   | FBgn0028373             | 8.78  | 8.57  | 9.04  | 8.43  | 7.96  | 8.42  |
| 1638550 s at | FBgn0003074             | 11.02 | 10.81 | 10.87 | 11.05 | 11.06 | 10.67 |
| 1641599 at   | ---                     | 11.71 | 11.5  | 11.02 | 11.05 | 11.15 | 11.02 |
| 1635137 a at | FBgn0036212 /// FBgn003 | 9.63  | 9.42  | 9.66  | 9.31  | 9.51  | 9.28  |
| 1637286 a at | FBgn0003209             | 9.49  | 9.28  | 9.32  | 9.4   | 9.23  | 9.07  |

|              |                         |       |       |       |       |       |       |
|--------------|-------------------------|-------|-------|-------|-------|-------|-------|
| 1637125 at   | FBgn0030060             | 10.09 | 9.87  | 9.9   | 10.3  | 10.24 | 9.67  |
| 1629115 s at | FBgn0026178             | 8.67  | 8.45  | 8.54  | 8.39  | 8.38  | 8.22  |
| 1632658 a at | FBgn0031192 /// FBgn003 | 7.52  | 7.31  | 7.07  | 7.17  | 7.29  | 6.94  |
| 1624139 at   | FBgn0011754             | 9.82  | 9.6   | 9.51  | 9.39  | 9.6   | 9.5   |
| 1637401 at   | FBgn0030528             | 8.75  | 8.53  | 8.35  | 8.31  | 8.76  | 8.51  |
| 1636354 at   | FBgn0033160             | 9.29  | 9.07  | 9.63  | 9.63  | 9.59  | 9.24  |
| 1634978 at   | FBgn0032140             | 8.3   | 8.08  | 8.01  | 7.25  | 7.7   | 8.01  |
| 1640199 at   | FBgn0037332             | 9.16  | 8.95  | 8.96  | 9.1   | 9.09  | 8.95  |
| 1634704 at   | ---                     | 7.28  | 7.07  | 7     | 7.27  | 7.18  | 6.89  |
| 1627004 at   | FBgn0037071             | 8.84  | 8.62  | 8.58  | 8.87  | 8.93  | 8.77  |
| 1628815 at   | ---                     | 9.98  | 9.76  | 9.71  | 9.45  | 9.7   | 9.6   |
| 1624686 a at | FBgn0000479             | 8.64  | 8.43  | 8.77  | 8.86  | 8.55  | 8.38  |
| 1635447 at   | FBgn0034225             | 7.66  | 7.44  | 7.58  | 6.9   | 7.1   | 7.44  |
| 1628117 at   | FBgn0001226             | 12.4  | 12.18 | 12.18 | 12.7  | 12.62 | 12.23 |
| 1637079 at   | FBgn0034300             | 9.66  | 9.45  | 9.28  | 9.29  | 9.35  | 9.45  |
| 1623605 a at | FBgn0043364             | 9.62  | 9.41  | 9.37  | 9.13  | 9.4   | 9.22  |
| 1636003 at   | FBgn0032430             | 8.3   | 8.09  | 8.66  | 8.46  | 8.2   | 7.93  |
| 1641293 at   | FBgn0038736             | 7.59  | 7.38  | 7.5   | 7.43  | 7.57  | 7.36  |
| 1631237 s at | FBgn0032036             | 9.52  | 9.3   | 9.33  | 9.07  | 9.38  | 9.05  |
| 1626314 at   | FBgn0026158             | 10.13 | 9.91  | 10.35 | 9.93  | 10.13 | 9.87  |
| 1636026 at   | FBgn0003471             | 9.2   | 8.98  | 9.54  | 9.07  | 9.09  | 8.84  |
| 1628795 s at | FBgn0031779             | 7.7   | 7.49  | 7.6   | 7.84  | 7.64  | 7.47  |
| 1630118 s at | FBgn0033739             | 7.48  | 7.26  | 7.49  | 7.57  | 7.6   | 7.6   |
| AFFX-BioDn   | ---                     | 11.49 | 11.27 | 11.61 | 11.76 | 11.26 | 10.88 |
| 1632656 at   | FBgn0030048             | 10.39 | 10.17 | 9.34  | 9.63  | 10.21 | 9.86  |
| 1637037 at   | FBgn0000053             | 8.47  | 8.25  | 8.84  | 8.36  | 8.23  | 8.11  |
| 1629886 s at | FBgn0000721             | 12.14 | 11.92 | 12.13 | 11.95 | 12.03 | 12.08 |
| 1631412 at   | FBgn0029878             | 8.93  | 8.72  | 8.72  | 8.33  | 8.18  | 8.5   |
| 1623891 at   | ---                     | 9.17  | 8.95  | 9.47  | 9.42  | 9.38  | 9     |
| 1638581 at   | FBgn0031057             | 9.69  | 9.47  | 8.87  | 9.1   | 9.48  | 9.17  |
| 1629487 at   | FBgn0019949             | 9.35  | 9.13  | 9.08  | 9.31  | 9.35  | 9.1   |
| 1636274 at   | FBgn0030941             | 7.51  | 7.29  | 8.03  | 6.89  | 7.35  | 7.11  |
| 1626411 at   | FBgn0029984             | 10.26 | 10.04 | 10.55 | 10.32 | 10.28 | 10.09 |
| 1638317 at   | FBgn0030660             | 8.61  | 8.39  | 8.06  | 7.54  | 9.22  | 9.18  |
| 1626892 at   | FBgn0032920             | 10.48 | 10.26 | 10.32 | 10.41 | 10.51 | 10.26 |
| 1636841 at   | FBgn0033466             | 7.18  | 6.95  | 6.76  | 6.99  | 7.4   | 7.32  |

|              |                         |       |       |       |       |       |       |
|--------------|-------------------------|-------|-------|-------|-------|-------|-------|
| 1624592 at   | FBgn0032247             | 7.88  | 7.66  | 7.99  | 8.08  | 7.71  | 7.59  |
| 1624246 s at | FBgn0039849 /// FBgn003 | 9.89  | 9.67  | 9.58  | 9.96  | 10.02 | 9.62  |
| 1637778 a at | FBgn0039690             | 7.93  | 7.71  | 8.04  | 7.86  | 7.92  | 7.83  |
| 1639071 a at | FBgn0020381             | 9.03  | 8.81  | 8.77  | 8.45  | 8.52  | 8.7   |
| 1634720 at   | FBgn0030519             | 10.58 | 10.36 | 10.36 | 10.33 | 10.45 | 10.17 |
| 1638367 at   | ---                     | 10.24 | 10.01 | 10.43 | 10.58 | 10.64 | 10.16 |
| 1636923 a at | FBgn0033246             | 9.59  | 9.37  | 9.2   | 9.06  | 9.1   | 8.92  |
| 1633034 s at | FBgn0015222             | 12.86 | 12.63 | 12.64 | 12.7  | 12.81 | 12.65 |
| 1635677 a at | FBgn0014388             | 7.07  | 6.84  | 7.3   | 6.42  | 6.68  | 6.84  |
| 1633227 s at | FBgn0032402             | 7.89  | 7.67  | 7.65  | 7.39  | 7.61  | 7.56  |
| 1635744 at   | FBgn0032904             | 8.68  | 8.45  | 8.44  | 8.54  | 8.52  | 8.3   |
| 1636656 at   | FBgn0036804             | 8.46  | 8.23  | 8.48  | 8.55  | 8.52  | 8.26  |
| 1624589 a at | FBgn0028509             | 9.03  | 8.8   | 8.6   | 8.42  | 8.72  | 8.82  |
| 1640108 at   | FBgn0035318             | 8.15  | 7.93  | 8.09  | 8.13  | 8.25  | 8.06  |
| 1635870 at   | FBgn0030218             | 7.68  | 7.45  | 7.97  | 7.42  | 7.52  | 7.39  |
| 1639818 s at | FBgn0015949             | 8.71  | 8.48  | 8.7   | 8.72  | 8.76  | 8.67  |
| 1638587 at   | FBgn0003733             | 8.82  | 8.59  | 8.65  | 8.96  | 8.88  | 8.74  |
| 1628556 s at | FBgn0010229             | 7.25  | 7.02  | 7.09  | 7.18  | 7.09  | 6.98  |
| 1639579 s at | FBgn0031494 /// FBgn003 | 9.14  | 8.92  | 8.93  | 8.72  | 9.23  | 8.89  |
| 1632264 at   | FBgn0030467             | 7.92  | 7.69  | 6.81  | 6.78  | 7.92  | 7.81  |
| 1641066 s at | FBgn0032820             | 8.34  | 8.12  | 8.72  | 9.19  | 8.35  | 8.02  |
| 1640386 at   | FBgn0004003             | 8     | 7.77  | 8.39  | 6.81  | 6.52  | 8.06  |
| 1626590 a at | FBgn0033664             | 8.3   | 8.07  | 8.13  | 7.8   | 8.14  | 7.86  |
| 1626965 at   | FBgn0032618             | 7.31  | 7.08  | 7.32  | 6.02  | 7.31  | 7     |
| 1631402 s at | FBgn0010229             | 8.39  | 8.16  | 8.26  | 8.24  | 8.11  | 8.05  |
| 1632028 a at | ---                     | 9.26  | 9.03  | 9.33  | 9.06  | 9.24  | 8.91  |
| 1628199 at   | ---                     | 9.09  | 8.85  | 9     | 9.13  | 9.3   | 9.1   |
| 1625503 at   | FBgn0052425             | 10.33 | 10.09 | 10.57 | 9.86  | 9.84  | 10.08 |
| 1633319 at   | FBgn0035403             | 8.3   | 8.06  | 7.86  | 8.18  | 8.19  | 7.95  |
| 1629821 at   | ---                     | 10.06 | 9.82  | 9.62  | 9.81  | 9.72  | 9.72  |
| 1630145 s at | FBgn0029508             | 9.36  | 9.13  | 9.51  | 9.42  | 9.19  | 9.28  |
| 1634713 at   | FBgn0034902             | 10.72 | 10.48 | 10.74 | 10.76 | 10.76 | 10.56 |
| 1636769 at   | FBgn0032974             | 10.17 | 9.94  | 10.17 | 10.14 | 10.2  | 9.98  |
| 1630196 at   | FBgn0025109 /// FBgn000 | 9.01  | 8.77  | 8.62  | 8.32  | 8.51  | 8.67  |
| 1625236 s at | FBgn0040752             | 9.57  | 9.34  | 9.38  | 9.17  | 9.43  | 9.34  |
| 1639387 s at | FBgn0015924             | 9.16  | 8.92  | 8.86  | 8.78  | 9.11  | 8.99  |



|              |                         |       |       |       |       |       |       |
|--------------|-------------------------|-------|-------|-------|-------|-------|-------|
| 1636131 at   | FBgn0038035             | 7.42  | 7.19  | 7.51  | 7.72  | 7.04  | 6.92  |
| 1633572 at   | FBgn0033612             | 7.63  | 7.4   | 8.46  | 7.77  | 7.14  | 7.38  |
| 1640122 at   | ---                     | 11.27 | 11.04 | 10.76 | 10.61 | 11.1  | 10.74 |
| 1637665 at   | ---                     | 8.97  | 8.73  | 8.61  | 8.56  | 8.67  | 8.76  |
| 1631698 s at | FBgn0026147             | 7.43  | 7.19  | 7.32  | 7.18  | 6.7   | 6.86  |
| 1628453 at   | FBgn0030194             | 11.5  | 11.26 | 11.63 | 11.41 | 11.28 | 11.17 |
| 1641111 s at | FBgn0028646             | 7.94  | 7.7   | 7.74  | 8.19  | 7.8   | 7.47  |
| 1632691 at   | FBgn0004636             | 10.17 | 9.94  | 10.13 | 9.77  | 9.7   | 9.86  |
| 1641452 a at | FBgn0041203             | 7.88  | 7.64  | 7.78  | 7.67  | 7.77  | 7.55  |
| 1630661 at   | ---                     | 10.86 | 10.62 | 10.7  | 10.28 | 10.69 | 10.66 |
| 1634249 s at | FBgn0021967             | 10.96 | 10.72 | 11.19 | 10.82 | 10.97 | 10.65 |
| 1638132 at   | FBgn0039094             | 7.51  | 7.27  | 7.67  | 8.04  | 6.99  | 7.02  |
| 1623468 at   | FBgn0035210             | 8.7   | 8.46  | 8.5   | 9.06  | 8.76  | 8.57  |
| 1628428 at   | FBgn0025373             | 9.81  | 9.57  | 9.81  | 9.54  | 9.74  | 9.59  |
| 1634846 a at | FBgn0031024             | 11.5  | 11.26 | 11.74 | 11.39 | 11.53 | 11.22 |
| 1641231 at   | FBgn0033182             | 7.23  | 6.99  | 7.17  | 7.21  | 7.28  | 7.19  |
| 1627060 s at | FBgn0010225             | 7.28  | 7.04  | 7.27  | 6.99  | 7.55  | 7.24  |
| 1635256 s at | FBgn0035321             | 9.93  | 9.69  | 9.72  | 9.63  | 9.95  | 9.81  |
| 1633750 s at | FBgn0031291             | 8.44  | 8.2   | 7.91  | 7.15  | 7.72  | 7.69  |
| 1641530 s at | FBgn0033478             | 9.98  | 9.74  | 9.8   | 10.35 | 9.66  | 9.34  |
| 1628469 a at | FBgn0052529             | 7.7   | 7.46  | 7.61  | 7.52  | 7.55  | 7.5   |
| 1633803 at   | FBgn0003076             | 10.38 | 10.14 | 10.43 | 10.52 | 10.57 | 10.14 |
| 1638953 a at | FBgn0035264 /// FBgn002 | 9.93  | 9.69  | 10.05 | 9.79  | 9.72  | 9.71  |
| 1631671 at   | ---                     | 8.78  | 8.54  | 8.73  | 8.76  | 8.72  | 8.27  |
| 1631516 s at | ---                     | 8.09  | 7.84  | 8.13  | 8.02  | 8     | 8.01  |
| 1629072 at   | FBgn0003638             | 10.08 | 9.83  | 9.23  | 9.16  | 9.63  | 9.24  |
| 1636543 a at | FBgn0039690             | 7.04  | 6.79  | 7.13  | 6.91  | 7.04  | 6.92  |
| 1624756 at   | FBgn0027572             | 7.39  | 7.14  | 7.45  | 7.46  | 7.64  | 6.9   |
| 1638051 at   | FBgn0032713             | 7.35  | 7.1   | 7.98  | 7.12  | 6.96  | 7.03  |
| 1641304 s at | FBgn0037623             | 8.28  | 8.03  | 8.36  | 8.5   | 7.79  | 7.75  |
| 1637017 at   | FBgn0037240             | 9.31  | 9.07  | 9.34  | 9.38  | 9.22  | 9.09  |
| 1625175 s at | FBgn0031401             | 9.38  | 9.13  | 9.42  | 9.15  | 9.33  | 9.25  |
| 1634587 s at | FBgn0036134             | 10.03 | 9.78  | 9.94  | 10    | 10    | 9.9   |
| 1624666 at   | FBgn0037526             | 7.72  | 7.48  | 7.58  | 7.83  | 7.42  | 7.36  |
| 1629239 s at | FBgn0039790             | 9.6   | 9.36  | 9.73  | 9.7   | 9.77  | 9.46  |
| 1623100 at   | FBgn0027885             | 10.68 | 10.43 | 10.32 | 9.71  | 10.3  | 10.55 |

|              |                         |       |       |       |       |       |       |
|--------------|-------------------------|-------|-------|-------|-------|-------|-------|
| 1631392 at   | FBgn0039241             | 11.01 | 10.76 | 11.23 | 11.35 | 10.88 | 10.54 |
| 1638324 s at | FBgn0038985             | 8.51  | 8.27  | 9.05  | 7.23  | 7.49  | 8.62  |
| 1638074 at   | FBgn0035906             | 7.87  | 7.63  | 7.42  | 7.85  | 7.6   | 7.29  |
| 1631141 at   | FBgn0025571             | 10.04 | 9.79  | 9.49  | 9.71  | 9.84  | 9.67  |
| 1625369 at   | FBgn0038804             | 7.34  | 7.09  | 7.17  | 7.1   | 7.06  | 6.7   |
| 1624620 at   | FBgn0004378             | 9.31  | 9.06  | 9.16  | 8.89  | 9.2   | 9     |
| 1637398 a at | FBgn0000256             | 7.86  | 7.61  | 7.71  | 7.85  | 7.79  | 7.42  |
| 1626646 s at | FBgn0036623             | 9.4   | 9.15  | 9.41  | 9.13  | 9.44  | 9.2   |
| 1630807 at   | FBgn0039122 /// FBgn005 | 7.27  | 7.02  | 7.25  | 6.46  | 6.75  | 6.9   |
| 1625889 at   | FBgn0020910             | 8.69  | 8.44  | 8.48  | 7.85  | 8.55  | 8.55  |
| 1640489 at   | FBgn0038347             | 7.43  | 7.18  | 7.41  | 7.08  | 7.34  | 7.02  |
| 1623376 s at | FBgn0013305             | 9.68  | 9.42  | 9.54  | 9.47  | 9.66  | 9.58  |
| 1630806 at   | FBgn0000810             | 8.3   | 8.05  | 8.06  | 8.07  | 8     | 7.99  |
| 1631377 a at | FBgn0022709             | 7.56  | 7.31  | 7.71  | 7.41  | 7.62  | 7.31  |
| 1635918 at   | FBgn0052542             | 8.98  | 8.73  | 8.92  | 8.65  | 8.41  | 8.71  |
| 1623849 s at | FBgn0039049             | 8.62  | 8.37  | 8.78  | 8.87  | 8.56  | 8.36  |
| 1626745 at   | FBgn0029118             | 8.78  | 8.53  | 8.96  | 8.97  | 8.81  | 8.56  |
| 1628075 at   | FBgn0015522             | 10.3  | 10.05 | 9.83  | 9.73  | 10.14 | 9.91  |
| 1634935 a at | FBgn0033446             | 8.25  | 7.99  | 8.22  | 7.99  | 8.65  | 8.41  |
| 1626173 at   | FBgn0010083             | 11.37 | 11.11 | 10.98 | 11.18 | 11.06 | 10.87 |
| 1635635 a at | FBgn0015766             | 8.98  | 8.73  | 9.24  | 8.11  | 8.55  | 8.65  |
| 1638265 s at | FBgn0051311             | 9.3   | 9.05  | 9.41  | 9.61  | 9.58  | 9.25  |
| 1626624 s at | FBgn0041789             | 7.63  | 7.38  | 7.23  | 7.93  | 7.51  | 7.27  |
| 1627673 at   | FBgn0003321             | 9.82  | 9.56  | 9.53  | 9.53  | 9.79  | 9.61  |
| 1641334 at   | ---                     | 10.22 | 9.97  | 10.12 | 10.18 | 10.31 | 10.01 |
| 1625136 s at | FBgn0032849             | 9.82  | 9.57  | 9.9   | 9.94  | 9.85  | 9.62  |
| 1634429 at   | ---                     | 8.4   | 8.14  | 8.12  | 7.99  | 8.28  | 8.02  |
| 1641082 at   | FBgn0030028             | 8.33  | 8.07  | 8.27  | 8.41  | 8.33  | 8.23  |
| 1641267 at   | FBgn0003189             | 9.04  | 8.78  | 9.35  | 8.83  | 9.01  | 8.82  |
| 1641074 s at | FBgn0011673             | 9.19  | 8.93  | 8.85  | 8.87  | 9.2   | 9.06  |
| 1637361 a at | FBgn0025388             | 8.86  | 8.6   | 8.34  | 8.59  | 8.89  | 8.62  |
| 1632675 s at | FBgn0039430             | 8.87  | 8.61  | 8.03  | 8.63  | 8.88  | 8.64  |
| 1640077 at   | FBgn0030741             | 7.94  | 7.68  | 7.81  | 8.02  | 8.15  | 7.61  |
| 1639015 s at | FBgn0001123             | 7.78  | 7.52  | 8.46  | 7.59  | 7.84  | 7.92  |
| 1640976 at   | FBgn0029978             | 9.06  | 8.8   | 8.83  | 8.76  | 8.91  | 8.69  |
| 1624210 at   | ---                     | 8.72  | 8.46  | 8.8   | 9.05  | 8.97  | 8.52  |

|              |                         |       |       |       |       |       |       |
|--------------|-------------------------|-------|-------|-------|-------|-------|-------|
| 1631768 at   | FBgn0022986             | 8.31  | 8.05  | 8.04  | 7.91  | 7.93  | 7.8   |
| 1639575 at   | FBgn0033458             | 10.49 | 10.23 | 9.82  | 9.78  | 10.94 | 10.55 |
| 1635886 s at | ---                     | 7.11  | 6.85  | 7.55  | 6.21  | 6.38  | 5.78  |
| 1636101 a at | FBgn0051729             | 9.3   | 9.03  | 9.21  | 9.36  | 9.25  | 9.01  |
| 1626570 s at | FBgn0025803             | 9.71  | 9.45  | 9.76  | 9.55  | 9.69  | 9.34  |
| 1636096 at   | FBgn0030710             | 9.55  | 9.29  | 9.35  | 9.4   | 9.44  | 9.1   |
| 1633934 at   | FBgn0037744             | 9.39  | 9.13  | 9.61  | 9.21  | 9.06  | 8.99  |
| 1633081 at   | FBgn0031192 /// FBgn003 | 9.87  | 9.6   | 9.64  | 9.69  | 9.62  | 9.46  |
| 1625298 at   | FBgn0031510             | 7.32  | 7.06  | 7.02  | 7.56  | 7.68  | 7.25  |
| AFFX-BioC-3  | ---                     | 10.4  | 10.14 | 9.96  | 10.07 | 10.1  | 9.71  |
| 1626707 a at | FBgn0000083             | 10.6  | 10.33 | 10.62 | 10.41 | 10.4  | 10.16 |
| 1640834 at   | FBgn0053002             | 10.27 | 10.01 | 10.18 | 10.2  | 10.32 | 9.97  |
| 1632952 at   | FBgn0032160             | 10.39 | 10.12 | 10.24 | 10.32 | 10.41 | 10    |
| 1624873 at   | FBgn0001296             | 9.62  | 9.35  | 10.32 | 9.2   | 8.7   | 9.27  |
| 1628339 a at | FBgn0039737             | 8.45  | 8.19  | 8.48  | 8.3   | 8.95  | 8.46  |
| 1641518 a at | FBgn0016977             | 8.59  | 8.32  | 8.38  | 7.96  | 8.24  | 8.23  |
| 1636468 a at | FBgn0028744             | 9.06  | 8.79  | 9.19  | 8.76  | 8.94  | 8.77  |
| 1634845 at   | FBgn0033127             | 9.77  | 9.5   | 9.33  | 9.76  | 9.75  | 9.44  |
| 1638060 at   | FBgn0035720             | 8.57  | 8.3   | 7.68  | 7.54  | 7.93  | 7.98  |
| 1641506 at   | ---                     | 11.95 | 11.68 | 11.16 | 11.34 | 11.57 | 11.32 |
| 1631223 at   | FBgn0037369             | 9.57  | 9.3   | 9.64  | 9.89  | 9.62  | 9.24  |
| 1624119 at   | FBgn0052486             | 8.86  | 8.59  | 8.68  | 8.52  | 8.59  | 8.59  |
| 1633386 s at | ---                     | 6.16  | 5.89  | 5.68  | 4.64  | 7.31  | 5.4   |
| 1636809 at   | FBgn0002525             | 9.63  | 9.36  | 9.6   | 9.31  | 9.32  | 9.14  |
| 1635062 at   | FBgn0052743             | 8.12  | 7.85  | 7.69  | 7.4   | 7.95  | 7.75  |
| 1635900 at   | FBgn0022073             | 10.18 | 9.91  | 10.25 | 9.64  | 10    | 9.92  |
| 1636947 at   | FBgn0036424             | 8.41  | 8.14  | 8.44  | 7.83  | 8.06  | 8.25  |
| 1641207 s at | FBgn0030817             | 11.68 | 11.41 | 11.63 | 11.73 | 11.8  | 11.67 |
| 1639877 at   | FBgn0023181             | 9.08  | 8.81  | 9.04  | 9.56  | 9.26  | 8.77  |
| 1629568 at   | ---                     | 8.38  | 8.11  | 8.56  | 8.4   | 8.3   | 8.15  |
| 1641556 a at | FBgn0022153             | 8.61  | 8.34  | 8.38  | 8.33  | 8.56  | 8.36  |
| 1638653 a at | FBgn0032469             | 7.82  | 7.55  | 8.07  | 7.7   | 7.12  | 7.43  |
| 1626393 at   | FBgn0033375             | 8.38  | 8.1   | 8.08  | 8.05  | 7.96  | 7.98  |
| 1633488 at   | FBgn0023129             | 9.68  | 9.41  | 9.61  | 9.72  | 9.91  | 9.59  |
| 1641279 at   | FBgn0000173             | 9.2   | 8.92  | 9.18  | 8.66  | 8.87  | 9.02  |
| 1634156 at   | FBgn0032208             | 10.16 | 9.89  | 10.21 | 9.81  | 10.09 | 9.94  |

|              |             |       |       |       |       |       |       |
|--------------|-------------|-------|-------|-------|-------|-------|-------|
| 1625710 at   | ---         | 9.46  | 9.19  | 9.22  | 9.32  | 9.47  | 9.1   |
| 1633054 at   | FBgn0036696 | 10.4  | 10.12 | 10.3  | 10.32 | 10.18 | 9.94  |
| 1623770 at   | FBgn0030482 | 8.16  | 7.89  | 8.29  | 7.88  | 7.39  | 7.22  |
| 1631149 s at | FBgn0011638 | 11.28 | 11.01 | 10.95 | 11.07 | 11.07 | 10.9  |
| 1636958 s at | ---         | 9.76  | 9.48  | 9.8   | 9.62  | 9.73  | 9.41  |
| 1634522 s at | FBgn0020389 | 8.02  | 7.75  | 7.97  | 7.7   | 7.96  | 7.53  |
| 1624378 at   | FBgn0010110 | 8.87  | 8.59  | 8.72  | 8.69  | 8.67  | 8.34  |
| 1625744 at   | ---         | 10.88 | 10.6  | 11.37 | 11.59 | 11.19 | 11.51 |
| AFFX-r2-Ec-l | ---         | 8.85  | 8.57  | 8.37  | 8.68  | 8.6   | 8.05  |
| 1624324 a at | ---         | 11.34 | 11.06 | 11.42 | 11.71 | 11.53 | 11.19 |
| 1632466 at   | FBgn0032926 | 9.96  | 9.68  | 9.49  | 9.66  | 9.82  | 9.51  |
| 1627040 at   | FBgn0027507 | 9.12  | 8.84  | 9.56  | 9.06  | 9.47  | 8.93  |
| 1633592 a at | ---         | 9.06  | 8.77  | 9.33  | 8.95  | 9.19  | 8.65  |
| 1629209 at   | FBgn0038183 | 8.33  | 8.04  | 9.14  | 8.21  | 8     | 8.02  |
| 1635035 at   | FBgn0036446 | 7.23  | 6.95  | 7.16  | 7.12  | 6.81  | 6.71  |
| 1632519 at   | FBgn0034054 | 8.26  | 7.98  | 8.06  | 8.23  | 8.37  | 8.01  |
| 1625281 at   | FBgn0027581 | 9.31  | 9.03  | 9.28  | 9.17  | 9.41  | 9.13  |
| 1626315 at   | FBgn0030942 | 9.77  | 9.48  | 9.81  | 9.89  | 9.85  | 9.4   |
| 1631004 s at | FBgn0003567 | 9.13  | 8.84  | 9.07  | 9.33  | 9.38  | 9.03  |
| 1623959 at   | FBgn0031143 | 10.45 | 10.16 | 10.37 | 10.76 | 10.54 | 9.76  |
| 1635940 at   | FBgn0032228 | 7.2   | 6.91  | 7.33  | 6.52  | 6.8   | 7.15  |
| 1632103 at   | FBgn0037270 | 11.1  | 10.81 | 11.09 | 10.78 | 11.12 | 10.82 |
| 1634106 at   | ---         | 7.74  | 7.46  | 7.52  | 7.18  | 7.15  | 7.24  |
| 1627653 at   | FBgn0052597 | 6.88  | 6.59  | 6.9   | 6.86  | 7.05  | 6.45  |
| 1629961 s at | FBgn0010609 | 8.73  | 8.44  | 8.51  | 8.71  | 8.41  | 8.52  |
| 1632377 at   | FBgn0034067 | 8.88  | 8.59  | 8.15  | 8.05  | 8.35  | 8.41  |
| AFFX-r2-Ec-l | ---         | 10.67 | 10.38 | 10.26 | 10.47 | 10.36 | 9.88  |
| 1625895 a at | FBgn0051211 | 8.22  | 7.93  | 7.51  | 7.45  | 7.63  | 7.6   |
| 1631258 at   | FBgn0050005 | 9.77  | 9.48  | 9.73  | 9.49  | 9.85  | 9.53  |
| 1639527 at   | FBgn0032243 | 8.6   | 8.31  | 8.43  | 8.36  | 8.52  | 8.36  |
| 1624075 at   | FBgn0051495 | 7.19  | 6.9   | 7.61  | 7.82  | 7.5   | 6.77  |
| 1640922 a at | FBgn0004914 | 9.35  | 9.06  | 9.36  | 9.31  | 9.44  | 9.31  |
| 1625792 s at | ---         | 10.57 | 10.27 | 10.41 | 10.92 | 10.82 | 10.42 |
| 1627854 at   | FBgn0030737 | 8.81  | 8.51  | 8.75  | 8.61  | 8.17  | 8.13  |
| 1641022 a at | FBgn0010383 | 8.01  | 7.72  | 7.96  | 7.41  | 7.28  | 7.31  |
| 1633143 s at | ---         | 7.45  | 7.16  | 7.19  | 6.75  | 6.52  | 6.7   |

|              |                         |       |       |       |       |       |       |
|--------------|-------------------------|-------|-------|-------|-------|-------|-------|
| 1631595 at   | ---                     | 10.24 | 9.95  | 10.39 | 9.85  | 10.15 | 9.93  |
| 1641289 at   | FBgn0003498             | 11.25 | 10.95 | 11.65 | 10.85 | 10.74 | 11.01 |
| 1631549 s at | FBgn0033836             | 8.54  | 8.25  | 8.29  | 8.46  | 8.6   | 8.18  |
| 1624331 at   | ---                     | 9.58  | 9.28  | 9.74  | 9.66  | 9.56  | 9.25  |
| 1627796 s at | FBgn0037444             | 9.79  | 9.49  | 9.82  | 9.6   | 9.69  | 9.5   |
| 1631565 a at | FBgn0000370             | 10.87 | 10.57 | 11.41 | 11.13 | 11.21 | 10.91 |
| 1636771 at   | ---                     | 9.15  | 8.85  | 9.18  | 9.28  | 9.21  | 8.91  |
| 1634188 a at | FBgn0014396             | 7.69  | 7.39  | 7.85  | 7.28  | 7.68  | 7.58  |
| 1627015 at   | FBgn0030026             | 8.98  | 8.68  | 8.68  | 8.85  | 8.82  | 8.46  |
| 1641078 s at | FBgn0034025             | 9.35  | 9.05  | 9.11  | 8.83  | 9.14  | 9.03  |
| 1633379 s at | FBgn0000338             | 9.21  | 8.91  | 9.24  | 8.93  | 9     | 9.05  |
| 1629905 s at | ---                     | 7.29  | 6.99  | 7.92  | 7.52  | 7.02  | 7.28  |
| 1632135 a at | FBgn0000662             | 9.93  | 9.63  | 9.53  | 10    | 9.94  | 9.67  |
| 1641685 at   | FBgn0036735             | 8.34  | 8.04  | 8.44  | 8.19  | 8     | 8.05  |
| 1633468 x at | ---                     | 7.53  | 7.23  | 7.07  | 7.01  | 7.39  | 7.24  |
| 1626749 a at | FBgn0036837 /// FBgn003 | 11.04 | 10.74 | 10.67 | 10.77 | 10.92 | 10.87 |
| 1622950 a at | FBgn0034611             | 9.93  | 9.63  | 10    | 9.42  | 9.78  | 9.56  |
| 1635808 s at | FBgn0027610             | 8.94  | 8.64  | 9.21  | 9.24  | 9.06  | 8.67  |
| 1624913 s at | FBgn0011818             | 8.59  | 8.29  | 8.16  | 8.4   | 8.51  | 8.16  |
| 1640793 at   | FBgn0033951             | 9.28  | 8.98  | 9.32  | 9.47  | 9.61  | 9.27  |
| 1633760 at   | FBgn0031877             | 7.31  | 7     | 7.47  | 7.27  | 7.41  | 7.07  |
| 1625697 at   | ---                     | 7.17  | 6.86  | 6.15  | 4.12  | 6.93  | 6.18  |
| 1632963 at   | FBgn0039561             | 9.02  | 8.72  | 8.69  | 8.67  | 8.85  | 8.88  |
| 1633225 at   | FBgn0052278             | 9.93  | 9.62  | 10.02 | 9.67  | 9.72  | 9.53  |
| 1641281 at   | FBgn0033581             | 9.5   | 9.19  | 9.33  | 9.69  | 9.68  | 9.15  |
| 1626352 at   | ---                     | 7     | 6.7   | 6.82  | 6.41  | 6.72  | 6.32  |
| 1625027 a at | FBgn0036545             | 9.61  | 9.31  | 8.58  | 9.23  | 9.56  | 9.2   |
| 1627493 at   | FBgn0031913             | 10.53 | 10.23 | 10.74 | 9.92  | 10.28 | 9.84  |
| 1636301 s at | FBgn0040108             | 9.6   | 9.29  | 9.92  | 9.68  | 9.49  | 9.61  |
| 1628132 at   | FBgn0032517             | 7.22  | 6.92  | 7.12  | 6.93  | 7.25  | 6.88  |
| 1633843 at   | FBgn0028952             | 7.58  | 7.27  | 7.19  | 7.39  | 7.71  | 7.57  |
| 1637785 at   | FBgn0001332             | 10.8  | 10.49 | 10.77 | 11.18 | 10.94 | 10.56 |
| 1637402 at   | ---                     | 8.55  | 8.24  | 8.26  | 8.46  | 8.63  | 8.32  |
| 1623954 s at | FBgn0031025             | 9.77  | 9.46  | 9.82  | 10.04 | 10.03 | 9.53  |
| 1637491 s at | FBgn0023507             | 7.3   | 6.99  | 7.73  | 7.16  | 7.37  | 6.69  |
| 1639233 at   | FBgn0040234             | 7.74  | 7.43  | 7.64  | 7.57  | 7.78  | 7.46  |

|              |             |       |       |       |       |       |       |
|--------------|-------------|-------|-------|-------|-------|-------|-------|
| 1636928 s at | FBgn0031174 | 9.38  | 9.08  | 9.55  | 9.48  | 9.14  | 9.11  |
| 1625445 s at | FBgn0003396 | 8.43  | 8.12  | 8.71  | 8.33  | 8.31  | 8.26  |
| 1633232 at   | ---         | 7.81  | 7.5   | 7.76  | 7.1   | 7.6   | 7.58  |
| 1634222 at   | FBgn0038953 | 7.87  | 7.56  | 7.85  | 8.66  | 7.89  | 7.49  |
| 1628873 s at | FBgn0032940 | 9.99  | 9.68  | 9.85  | 9.53  | 9.68  | 9.49  |
| 1624070 at   | FBgn0010408 | 9.48  | 9.16  | 9.29  | 8.79  | 9.5   | 9.22  |
| 1631013 at   | ---         | 10.06 | 9.75  | 9.89  | 9.64  | 9.8   | 9.74  |
| 1625196 a at | FBgn0035497 | 8.52  | 8.21  | 8.38  | 8.4   | 8.6   | 8.37  |
| 1630318 at   | ---         | 9.05  | 8.74  | 8.65  | 8.91  | 9.33  | 8.89  |
| 1634572 at   | FBgn0034259 | 12.34 | 12.03 | 12.34 | 12.16 | 12.35 | 12.04 |
| 1628352 a at | FBgn0036892 | 7.31  | 7     | 7.53  | 7.33  | 7.24  | 6.93  |
| 1626579 at   | FBgn0029925 | 9.54  | 9.23  | 9.11  | 9.51  | 9.79  | 9.25  |
| 1639306 s at | FBgn0035142 | 9.17  | 8.86  | 9.45  | 8.99  | 8.99  | 8.81  |
| 1633454 s at | FBgn0027621 | 7.01  | 6.69  | 6.58  | 6.63  | 6.5   | 6.39  |
| 1632958 a at | FBgn0034648 | 7.84  | 7.52  | 7.72  | 7.61  | 8.08  | 7.7   |
| 1624742 a at | FBgn0023211 | 11.21 | 10.89 | 11.3  | 10.96 | 11.23 | 11.04 |
| 1630653 a at | FBgn0001145 | 7.44  | 7.13  | 7.38  | 6.36  | 7.04  | 6.64  |
| AFFX-BioB-N  | ---         | 9.69  | 9.37  | 9.21  | 9.38  | 9.28  | 8.88  |
| 1641650 at   | FBgn0015573 | 7.11  | 6.79  | 8.36  | 8.46  | 7.88  | 7.56  |
| AFFX-r2-Ec-t | ---         | 9.36  | 9.04  | 8.97  | 9.18  | 9.04  | 8.54  |
| 1637867 at   | FBgn0031706 | 7.15  | 6.83  | 6.96  | 6.44  | 6.36  | 6.73  |
| 1624798 s at | FBgn0004435 | 7.15  | 6.83  | 6.94  | 6.56  | 6.84  | 6.95  |
| AFFX-BioC-5  | ---         | 10.42 | 10.1  | 9.82  | 9.95  | 10.1  | 9.64  |
| 1628276 s at | ---         | 9.5   | 9.18  | 9.76  | 9.46  | 9.3   | 9.31  |
| 1635238 s at | FBgn0005536 | 7.16  | 6.84  | 7.45  | 6.96  | 6.93  | 6.72  |
| 1628143 a at | FBgn0003244 | 8     | 7.68  | 8.13  | 7.72  | 7.73  | 7.81  |
| AFFX-BioB-3  | ---         | 9.16  | 8.84  | 8.63  | 8.74  | 8.86  | 8.38  |
| 1627312 at   | FBgn0002611 | 6.95  | 6.63  | 7.49  | 7.35  | 8.07  | 7.57  |
| 1635037 at   | FBgn0035986 | 8.05  | 7.73  | 7.72  | 7.85  | 8.25  | 7.83  |
| 1632380 at   | FBgn0002777 | 8.86  | 8.53  | 9.55  | 9.12  | 8.18  | 8.1   |
| 1632179 at   | FBgn0014032 | 9.12  | 8.8   | 9.03  | 9.35  | 9.35  | 8.79  |
| 1622959 at   | FBgn0033432 | 10.17 | 9.85  | 9.91  | 9.61  | 10.08 | 9.84  |
| 1638645 at   | FBgn0031529 | 8.68  | 8.35  | 8.59  | 8.32  | 8.87  | 8.54  |
| 1628432 at   | FBgn0039537 | 10.41 | 10.08 | 9.66  | 10.44 | 10.67 | 9.89  |
| 1631362 at   | ---         | 9.63  | 9.3   | 9.95  | 9.64  | 9.64  | 9.39  |
| 1628032 a at | FBgn0051092 | 7.36  | 7.03  | 7.02  | 7.1   | 6.92  | 7.09  |

|              |                         |       |       |       |       |       |       |
|--------------|-------------------------|-------|-------|-------|-------|-------|-------|
| 1638964 at   | FBgn0037552             | 6.65  | 6.33  | 7.83  | 7.55  | 8.04  | 8.12  |
| 1631573 a at | FBgn0016078             | 7.94  | 7.61  | 7.83  | 7.8   | 7.58  | 7.74  |
| 1627443 at   | FBgn0029833             | 7.51  | 7.19  | 7.86  | 8.01  | 8.86  | 8.59  |
| 1630344 at   | FBgn0032298             | 9.1   | 8.77  | 9.62  | 9.25  | 8.92  | 8.75  |
| 1626654 a at | FBgn0039266             | 9.2   | 8.87  | 9.25  | 8.93  | 8.95  | 8.69  |
| 1634949 at   | FBgn0010303             | 7.57  | 7.24  | 7.15  | 6.97  | 7.18  | 7.23  |
| 1627348 at   | FBgn0038490             | 6.91  | 6.58  | 7.15  | 7.47  | 7.09  | 6.45  |
| 1623212 s at | FBgn0041582             | 7.56  | 7.23  | 7.67  | 7.33  | 6.93  | 7.05  |
| 1623693 a at | FBgn0020304             | 9.92  | 9.59  | 10.31 | 9.8   | 9.93  | 9.63  |
| 1641284 a at | FBgn0039229             | 9.18  | 8.85  | 9.05  | 9.05  | 9.06  | 8.88  |
| 1632298 s at | FBgn0024211             | 8.72  | 8.39  | 8.61  | 7.87  | 7.93  | 8.21  |
| 1631827 at   | FBgn0033467             | 7.66  | 7.33  | 7.96  | 8.43  | 8.15  | 7.75  |
| 1630858 s at | FBgn0039714             | 9.39  | 9.06  | 9.37  | 9.11  | 9.36  | 9.02  |
| 1624003 at   | FBgn0032729             | 8.7   | 8.37  | 8.74  | 8.49  | 8.57  | 8.27  |
| 1639009 at   | FBgn0030073             | 7.05  | 6.72  | 6.26  | 6.38  | 6.95  | 6.91  |
| 1625967 s at | FBgn0024515             | 9.06  | 8.72  | 8.98  | 8.45  | 8.17  | 8.24  |
| 1631569 s at | FBgn0013272             | 10.28 | 9.94  | 10.92 | 10.34 | 9.71  | 10.06 |
| 1623428 at   | FBgn0040968             | 8.33  | 8     | 7.64  | 6.12  | 7.78  | 7.61  |
| 1629713 at   | FBgn0035194             | 8.49  | 8.15  | 8.09  | 8.83  | 8.72  | 8.41  |
| 1636990 at   | ---                     | 7.89  | 7.56  | 7.73  | 7.58  | 7.86  | 7.41  |
| 1633770 at   | FBgn0037646             | 8.72  | 8.39  | 8.37  | 8.62  | 8.63  | 8.24  |
| 1631728 s at | FBgn0024734             | 9.65  | 9.32  | 9.4   | 9.39  | 9.1   | 9.14  |
| AFFX-r2-Ec-t | ---                     | 11    | 10.67 | 10.45 | 10.71 | 10.67 | 10.17 |
| 1639769 at   | ---                     | 10.65 | 10.31 | 10.74 | 10.44 | 10.31 | 10.04 |
| 1630365 at   | FBgn0038259             | 7.03  | 6.69  | 7.16  | 6.64  | 6.85  | 6.79  |
| 1636315 at   | FBgn0033195             | 7.19  | 6.85  | 6.77  | 7.29  | 7.31  | 7.02  |
| 1636505 at   | ---                     | 10.93 | 10.59 | 10.85 | 10.72 | 10.97 | 10.66 |
| 1641272 at   | FBgn0030130             | 8.71  | 8.37  | 8.47  | 7.9   | 7.84  | 8.23  |
| 1624856 at   | FBgn0028525             | 9.27  | 8.93  | 8.6   | 8.38  | 9.06  | 9.1   |
| 1627773 a at | FBgn0034405             | 10.77 | 10.43 | 10.55 | 10.2  | 10.9  | 10.68 |
| 1636694 at   | FBgn0035590             | 8.39  | 8.05  | 8.35  | 8.61  | 8.55  | 8.07  |
| 1624503 at   | FBgn0037012             | 7.58  | 7.24  | 7.98  | 6.84  | 6.78  | 7.45  |
| 1635372 a at | FBgn0038294 /// FBgn002 | 9.2   | 8.86  | 9.94  | 9     | 8.76  | 8.92  |
| 1627184 at   | ---                     | 8.14  | 7.8   | 8     | 7.7   | 7.76  | 7.73  |
| 1634250 at   | FBgn0000044             | 10.45 | 10.1  | 11.81 | 9.99  | 10.36 | 10.58 |
| 1635583 s at | FBgn0016797             | 7.29  | 6.95  | 8.14  | 7.67  | 7.15  | 6.96  |

|              |                         |       |       |       |       |       |       |
|--------------|-------------------------|-------|-------|-------|-------|-------|-------|
| 1635558 s at | FBgn0033802             | 8.98  | 8.64  | 9.03  | 8.7   | 8.44  | 8.33  |
| 1629088 at   | FBgn0035993 /// FBgn003 | 9.11  | 8.76  | 8.74  | 8.88  | 8.86  | 8.9   |
| 1624475 at   | ---                     | 9.97  | 9.63  | 10.35 | 10.19 | 10.19 | 9.52  |
| 1630378 at   | FBgn0031358             | 8.34  | 7.99  | 7.89  | 8.35  | 8.49  | 7.91  |
| 1629023 s at | ---                     | 10.81 | 10.46 | 10.74 | 11.04 | 11.05 | 10.76 |
| 1635040 a at | FBgn0015933             | 9.89  | 9.54  | 9.62  | 9.6   | 9.74  | 9.62  |
| 1623388 at   | FBgn0035084             | 7.15  | 6.8   | 6.87  | 6.9   | 6.52  | 6.32  |
| 1626349 at   | FBgn0024510             | 9.77  | 9.42  | 10.07 | 9.7   | 9.73  | 9.45  |
| 1631058 s at | ---                     | 10.93 | 10.58 | 10.8  | 10.91 | 11.07 | 10.68 |
| 1627132 at   | FBgn0034379             | 7.37  | 7.02  | 7.25  | 7.61  | 7.9   | 7.32  |
| 1629758 at   | ---                     | 7.75  | 7.4   | 7.56  | 7.67  | 7.94  | 7.58  |
| 1637499 s at | FBgn0032587             | 8.95  | 8.6   | 8.81  | 8.61  | 8.79  | 8.63  |
| 1641549 at   | FBgn0037892             | 9.23  | 8.88  | 9.25  | 9.21  | 9.22  | 8.79  |
| 1634576 at   | FBgn0004647             | 8.41  | 8.06  | 8.02  | 7.84  | 8.17  | 8.17  |
| 1624054 at   | FBgn0036752             | 7.37  | 7.02  | 8.23  | 7.49  | 7.17  | 6.74  |
| 1640775 a at | FBgn0010222             | 8.69  | 8.34  | 9.33  | 8.82  | 8.64  | 8.38  |
| 1635768 at   | FBgn0033814             | 10.18 | 9.82  | 9.97  | 9.57  | 9.78  | 9.78  |
| 1627216 s at | ---                     | 9.42  | 9.07  | 9     | 8.71  | 9.56  | 9.29  |
| 1633487 at   | FBgn0050109             | 9.25  | 8.89  | 9.01  | 8.98  | 9.33  | 8.95  |
| 1624857 at   | FBgn0039969             | 6.97  | 6.61  | 6.77  | 6.39  | 7.01  | 7.04  |
| 1641381 s at | FBgn0033609 /// FBgn003 | 9.41  | 9.05  | 9.1   | 9.12  | 9.48  | 9.22  |
| 1628580 a at | FBgn0051536             | 7.23  | 6.87  | 7.45  | 6.78  | 6.68  | 6.59  |
| 1639485 at   | ---                     | 9.63  | 9.27  | 9.68  | 9.49  | 9.96  | 9.53  |
| 1638819 at   | FBgn0051712             | 9.23  | 8.87  | 8.98  | 9.13  | 9.14  | 8.86  |
| 1632063 s at | FBgn0035558             | 8.08  | 7.72  | 8.23  | 8.19  | 8.1   | 8.32  |
| 1632339 s at | FBgn0014141             | 9.48  | 9.12  | 9.28  | 8.67  | 8.95  | 9.07  |
| 1625334 at   | ---                     | 11.51 | 11.15 | 11.28 | 11.23 | 11.55 | 11.06 |
| 1637256 at   | ---                     | 7.72  | 7.36  | 7.88  | 7.78  | 7.76  | 7.37  |
| 1634736 at   | FBgn0004873             | 9.73  | 9.37  | 9.7   | 9.49  | 9.86  | 9.47  |
| 1622908 a at | FBgn0030073             | 7.35  | 6.99  | 5.6   | 5.7   | 6.69  | 6.44  |
| 1638256 at   | FBgn0042713             | 8.5   | 8.13  | 8.44  | 8.57  | 8.69  | 8.44  |
| 1623875 at   | FBgn0036000             | 8.39  | 8.03  | 8.43  | 8.12  | 8.38  | 8.28  |
| 1636943 s at | ---                     | 10.33 | 9.97  | 10.19 | 10.65 | 10.17 | 9.82  |
| 1629965 at   | FBgn0027513             | 9.02  | 8.65  | 8.38  | 8.7   | 9.06  | 8.59  |
| AFFX-r2-Ec-l | ---                     | 9.51  | 9.14  | 9.03  | 9.4   | 9.21  | 8.66  |
| 1628398 at   | FBgn0032167             | 7.89  | 7.52  | 7.8   | 6.99  | 7.62  | 6.91  |



|              |                         |       |      |       |       |       |       |
|--------------|-------------------------|-------|------|-------|-------|-------|-------|
| 1624919 at   | FBgn0033734 /// FBgn003 | 8.71  | 8.34 | 8.57  | 8.29  | 8.26  | 8.23  |
| 1629511 at   | FBgn0038983             | 9.28  | 8.91 | 9.4   | 8     | 8.46  | 9.13  |
| 1631455 at   | FBgn0010649             | 7.9   | 7.53 | 7.82  | 7.77  | 7.82  | 7.44  |
| 1636648 s at | ---                     | 7.29  | 6.92 | 6.63  | 5.99  | 6.87  | 6.8   |
| 1638630 at   | FBgn0039751             | 8.09  | 7.72 | 7.73  | 8.08  | 8.05  | 7.67  |
| 1641620 s at | FBgn0029903             | 9.21  | 8.83 | 8.7   | 8.47  | 8.56  | 8.55  |
| 1636787 s at | FBgn0003691             | 9.85  | 9.47 | 9.73  | 9.6   | 9.43  | 9.24  |
| 1628385 a at | FBgn0011656             | 9.13  | 8.76 | 9.02  | 9.07  | 9.1   | 8.86  |
| 1623589 a at | FBgn0038983             | 7.55  | 7.18 | 7.51  | 5.75  | 6.78  | 7.42  |
| AFFX-BioB-S  | ---                     | 9.02  | 8.65 | 8.52  | 8.74  | 8.7   | 8.17  |
| 1636706 at   | FBgn0033402             | 8.15  | 7.78 | 7.87  | 8.22  | 8.1   | 7.65  |
| 1639217 s at | FBgn0010300             | 10.29 | 9.92 | 10    | 10.1  | 10.2  | 9.98  |
| 1626886 at   | FBgn0035044             | 9.6   | 9.23 | 9.43  | 9.84  | 9.46  | 9.05  |
| 1633597 at   | FBgn0038662             | 10.32 | 9.94 | 10.05 | 10.17 | 10.27 | 10.01 |
| 1635355 a at | FBgn0021872             | 10.03 | 9.65 | 9.37  | 9.49  | 9.67  | 9.48  |
| 1634269 at   | FBgn0031897             | 9.11  | 8.73 | 9.16  | 9.02  | 8.92  | 8.63  |
| 1638696 a at | FBgn0035999             | 9.23  | 8.85 | 8.8   | 8.7   | 9.31  | 9.03  |
| 1633375 at   | FBgn0035945             | 8.89  | 8.51 | 8.63  | 8.61  | 8.63  | 8.15  |
| 1640567 at   | FBgn0031374             | 8.57  | 8.19 | 8.41  | 8.3   | 8.45  | 8.23  |
| 1637943 at   | FBgn0017397             | 7.81  | 7.43 | 7.81  | 6.83  | 6.88  | 7.16  |
| 1634002 at   | FBgn0040827             | 9.59  | 9.22 | 8.87  | 7.9   | 8.43  | 8.37  |
| 1622909 at   | FBgn0020622             | 10.38 | 10   | 10.48 | 10.31 | 10.36 | 10.13 |
| 1623453 at   | ---                     | 8.66  | 8.28 | 8.61  | 9.21  | 9.16  | 8.85  |
| 1640801 at   | FBgn0017558             | 8.56  | 8.18 | 7.96  | 8.25  | 8.63  | 8.12  |
| 1640324 at   | FBgn0000083             | 9.61  | 9.23 | 9.42  | 8.68  | 8.98  | 9.03  |
| 1624410 at   | FBgn0034602             | 7.36  | 6.98 | 7.74  | 7.06  | 7.15  | 6.93  |
| 1636569 a at | FBgn0033538             | 7.97  | 7.58 | 7.83  | 7.57  | 7.79  | 7.48  |
| 1632796 s at | FBgn0000546             | 7.4   | 7.02 | 7.08  | 6.84  | 7.08  | 7.11  |
| 1625530 at   | FBgn0032815             | 9.08  | 8.69 | 9.28  | 9.16  | 9.64  | 9.21  |
| 1641504 s at | FBgn0034718             | 7.46  | 7.07 | 7.58  | 6.4   | 6.74  | 7.2   |
| 1623624 at   | FBgn0038340             | 7.47  | 7.08 | 8.1   | 6.85  | 6.91  | 7.32  |
| 1638948 at   | ---                     | 9.27  | 8.88 | 8.65  | 8.83  | 9.21  | 8.69  |
| 1625532 at   | FBgn0000394             | 8.34  | 7.94 | 8.23  | 8.31  | 8.38  | 8.23  |
| 1641380 a at | FBgn0040071             | 7.26  | 6.87 | 7.25  | 6.69  | 7.04  | 6.94  |
| 1630161 at   | FBgn0020439             | 7.31  | 6.92 | 8.5   | 7.58  | 7.43  | 7.02  |
| 1634154 at   | FBgn0029697             | 9.05  | 8.65 | 7.39  | 5.79  | 6.65  | 8.17  |

|              |             |       |       |       |       |       |       |
|--------------|-------------|-------|-------|-------|-------|-------|-------|
| 1634952 s at | FBgn0034392 | 7.16  | 6.76  | 7.15  | 6.82  | 7.3   | 6.82  |
| 1630900 at   | FBgn0026787 | 8.74  | 8.35  | 8.46  | 8.48  | 8.57  | 8.45  |
| 1634783 s at | FBgn0031229 | 10.78 | 10.38 | 10.89 | 10.66 | 10.64 | 10.4  |
| 1638345 at   | FBgn0000719 | 8.85  | 8.46  | 9.56  | 9.21  | 8.64  | 8.65  |
| 1636149 at   | FBgn0028490 | 10.3  | 9.9   | 9.48  | 9.17  | 9.82  | 9.54  |
| 1625173 s at | FBgn0036194 | 9.29  | 8.89  | 8.69  | 8.72  | 8.75  | 8.56  |
| 1641303 at   | FBgn0000562 | 9.79  | 9.4   | 9.66  | 10.07 | 9.82  | 9.54  |
| 1625885 at   | ---         | 7.75  | 7.35  | 8.35  | 7.52  | 7.24  | 7.17  |
| 1638193 at   | FBgn0039529 | 7.79  | 7.39  | 7.77  | 6.95  | 7.89  | 7.21  |
| 1630861 at   | FBgn0034057 | 8.84  | 8.44  | 8.71  | 8.69  | 8.71  | 8.46  |
| 1635218 at   | FBgn0036318 | 8.75  | 8.35  | 8.82  | 8.73  | 8.87  | 8.64  |
| 1622949 at   | FBgn0003053 | 8.23  | 7.83  | 8.27  | 7.84  | 7.59  | 7.72  |
| 1624907 at   | FBgn0029506 | 11.22 | 10.82 | 11.37 | 11.22 | 11.07 | 10.93 |
| 1635848 at   | FBgn0025885 | 9.22  | 8.81  | 9.17  | 9.17  | 9.17  | 8.74  |
| 1634738 s at | FBgn0051751 | 7.19  | 6.78  | 7.13  | 6.36  | 7.44  | 7.15  |
| 1623827 a at | FBgn0011592 | 7.83  | 7.42  | 8.29  | 8.53  | 7.91  | 7.76  |
| 1640075 a at | FBgn0036007 | 10.47 | 10.06 | 11.22 | 10.5  | 9.84  | 9.94  |
| 1634019 at   | FBgn0033205 | 7.59  | 7.18  | 7.65  | 6.1   | 7.38  | 7.08  |
| 1640932 s at | FBgn0052626 | 10.12 | 9.71  | 10.19 | 10.06 | 9.95  | 9.36  |
| 1627343 a at | FBgn0036764 | 9.66  | 9.25  | 10.07 | 9.92  | 9.51  | 9.04  |
| 1630309 s at | ---         | 9.07  | 8.66  | 9.63  | 9.11  | 8.68  | 8.79  |
| 1629740 at   | FBgn0051617 | 12.52 | 12.1  | 12.35 | 12.81 | 13.01 | 12.56 |
| 1627841 at   | FBgn0034705 | 7.69  | 7.27  | 7.14  | 7.16  | 7.32  | 7.18  |
| 1636718 s at | FBgn0031896 | 11.1  | 10.68 | 11.12 | 10.85 | 10.73 | 10.49 |
| 1637638 s at | FBgn0032752 | 7.96  | 7.53  | 7.93  | 8     | 7.96  | 7.51  |
| 1625740 at   | FBgn0031981 | 7.33  | 6.91  | 7.11  | 7.54  | 7.54  | 7.47  |
| 1640838 s at | FBgn0027932 | 11.4  | 10.98 | 11.41 | 11.14 | 11.58 | 11.21 |
| 1635460 a at | FBgn0002741 | 8.33  | 7.9   | 9.88  | 8.16  | 8.43  | 8.35  |
| 1630399 at   | FBgn0039709 | 7.45  | 7.03  | 7.53  | 7.09  | 6.16  | 7.15  |
| 1625389 at   | FBgn0035830 | 8.93  | 8.5   | 9.28  | 8.93  | 8.98  | 8.45  |
| 1624042 at   | FBgn0004834 | 7.95  | 7.52  | 7.99  | 7.69  | 7.82  | 7.53  |
| 1630814 s at | FBgn0030349 | 8.12  | 7.69  | 8.25  | 8.04  | 7.7   | 7.65  |
| 1638417 at   | FBgn0051373 | 8.12  | 7.68  | 8.1   | 8.1   | 8.54  | 8.04  |
| 1635661 at   | ---         | 8.07  | 7.63  | 8.08  | 7.21  | 7.49  | 7.3   |
| 1634742 at   | FBgn0022359 | 7.56  | 7.12  | 7.79  | 7.9   | 8.41  | 7.27  |
| 1637645 at   | FBgn0029002 | 7.85  | 7.41  | 8.7   | 7.73  | 7.55  | 7.3   |

|              |                         |       |       |       |       |       |      |
|--------------|-------------------------|-------|-------|-------|-------|-------|------|
| 1632317 at   | FBgn0031645             | 8.62  | 8.18  | 8.92  | 8.44  | 8.29  | 8.27 |
| 1638899 s at | FBgn0030174             | 9.99  | 9.55  | 9.57  | 9.4   | 9.09  | 8.84 |
| 1623200 at   | FBgn0011591             | 8     | 7.56  | 8.24  | 7.29  | 7.51  | 7.71 |
| 1635086 at   | FBgn0029838             | 7.38  | 6.93  | 7.21  | 6.33  | 6.83  | 6.68 |
| 1640417 a at | FBgn0033398             | 8.93  | 8.49  | 8.64  | 8.8   | 8.93  | 8.39 |
| 1641120 at   | FBgn0034723             | 7.35  | 6.9   | 7.98  | 6.82  | 7.3   | 7.05 |
| 1636643 at   | FBgn0035896             | 8.29  | 7.84  | 8.4   | 8.28  | 8.25  | 8.03 |
| 1639439 at   | FBgn0030357             | 7.82  | 7.37  | 7.56  | 7.5   | 8.31  | 7.91 |
| 1628658 at   | FBgn0024234             | 7.6   | 7.15  | 7.8   | 7.24  | 7.18  | 7.18 |
| 1634241 at   | FBgn0037999             | 8.35  | 7.9   | 8.04  | 7.88  | 8.77  | 8.24 |
| 1634337 s at | FBgn0053070             | 8.01  | 7.56  | 8.16  | 7.45  | 7.31  | 7.46 |
| 1628984 s at | FBgn0010228             | 9.88  | 9.43  | 10.52 | 9.51  | 9.09  | 9.51 |
| 1626416 a at | FBgn0011296             | 6.53  | 6.08  | 6.95  | 6.34  | 7.05  | 6.68 |
| 1626536 at   | FBgn0035904             | 7.08  | 6.63  | 6.35  | 7.09  | 7.12  | 6.77 |
| 1630083 at   | FBgn0015796             | 8.81  | 8.36  | 8.44  | 8.18  | 8.11  | 7.76 |
| 1624861 at   | ---                     | 8.77  | 8.32  | 8.57  | 8.74  | 8.89  | 8.69 |
| 1636268 at   | FBgn0040992             | 7.64  | 7.18  | 7.4   | 5.76  | 7.34  | 7.22 |
| 1636740 at   | FBgn0011768             | 11.49 | 11.03 | 11.55 | 11.11 | 11.64 | 11.1 |
| 1632515 a at | FBgn0032202             | 9.6   | 9.14  | 9.05  | 9.56  | 9.77  | 9.16 |
| 1639700 s at | FBgn0030672             | 9.32  | 8.86  | 9.6   | 9.2   | 9.53  | 9.31 |
| 1639115 s at | ---                     | 9.16  | 8.69  | 8.62  | 8.95  | 9.01  | 8.76 |
| 1638697 at   | FBgn0034920             | 7.43  | 6.96  | 7.66  | 6.75  | 7.79  | 6.82 |
| 1631291 at   | ---                     | 9.06  | 8.59  | 8.53  | 8.62  | 8.92  | 8.66 |
| 1628261 at   | FBgn0036589             | 7.45  | 6.98  | 8.87  | 7.16  | 7.58  | 7.56 |
| 1626138 s at | FBgn0005640             | 10.04 | 9.56  | 9.91  | 9.08  | 10.09 | 9.56 |
| 1629048 s at | FBgn0036663             | 7.77  | 7.3   | 7.4   | 7.08  | 7.73  | 7.3  |
| 1629409 s at | ---                     | 8.09  | 7.61  | 7.21  | 6.36  | 7.21  | 7.29 |
| 1622990 at   | FBgn0032218             | 7.75  | 7.27  | 7.86  | 7.05  | 6.91  | 6.94 |
| 1627242 at   | FBgn0011296             | 7.87  | 7.39  | 8.24  | 7.68  | 8.22  | 7.9  |
| 1638818 at   | ---                     | 9.04  | 8.55  | 10.37 | 8.71  | 8.89  | 9.11 |
| 1639093 s at | FBgn0032397             | 9.66  | 9.17  | 9.31  | 9.32  | 9.56  | 8.95 |
| 1633451 at   | FBgn0052634             | 7.6   | 7.11  | 6.8   | 6.18  | 6.76  | 6.73 |
| 1638405 at   | ---                     | 7.59  | 7.1   | 8.07  | 6.94  | 7.65  | 7.21 |
| 1634583 s at | FBgn0031220             | 7.02  | 6.53  | 6.75  | 5.69  | 6.25  | 6.3  |
| 1626461 at   | FBgn0036279 /// FBgn001 | 7.53  | 7.04  | 7.32  | 7.3   | 6.72  | 6.71 |
| 1633558 s at | FBgn0035515             | 8.58  | 8.08  | 8.08  | 8.39  | 8.73  | 7.97 |

|              |             |       |       |       |       |       |       |
|--------------|-------------|-------|-------|-------|-------|-------|-------|
| 1625588 s at | FBgn0036147 | 9.51  | 9.01  | 9.94  | 9.33  | 9.03  | 8.91  |
| 1638120 at   | FBgn0027547 | 9.7   | 9.2   | 9.54  | 8.46  | 9.68  | 8.77  |
| 1632989 a at | ---         | 7.85  | 7.36  | 7.25  | 8.19  | 8.23  | 7.69  |
| 1626246 s at | FBgn0024183 | 8.68  | 8.19  | 8.61  | 8.21  | 8.5   | 8.3   |
| 1632248 s at | FBgn0039858 | 11.91 | 11.41 | 11.92 | 11.73 | 11.77 | 11.3  |
| 1625664 at   | FBgn0036690 | 9.44  | 8.94  | 9.17  | 10.23 | 9.36  | 8.99  |
| 1633641 a at | FBgn0034194 | 7.06  | 6.56  | 7.13  | 6.39  | 6.62  | 6.51  |
| 1638022 at   | FBgn0035253 | 7.49  | 6.99  | 6.64  | 6.23  | 6.65  | 6.87  |
| 1625035 at   | ---         | 7.78  | 7.27  | 7.62  | 7.09  | 7.28  | 7.11  |
| 1637534 at   | FBgn0041585 | 8.1   | 7.59  | 8.56  | 7.83  | 8.52  | 7.88  |
| 1635715 at   | FBgn0051611 | 12.25 | 11.74 | 12.06 | 12.36 | 12.67 | 12.19 |
| 1631242 at   | ---         | 8.41  | 7.9   | 8.05  | 7.99  | 8.25  | 8.14  |
| 1639733 s at | FBgn0032022 | 7.07  | 6.56  | 7.18  | 6.76  | 7     | 6.85  |
| 1631456 at   | FBgn0036843 | 9.75  | 9.24  | 9.6   | 9.52  | 9.67  | 9.31  |
| 1640991 at   | ---         | 7.97  | 7.46  | 8.14  | 7.27  | 7.33  | 7.34  |
| 1629438 at   | ---         | 7.93  | 7.42  | 7.26  | 6.86  | 7.41  | 7.38  |
| 1627962 at   | FBgn0051749 | 8.09  | 7.57  | 8.24  | 8.01  | 7.4   | 7.62  |
| 1631380 s at | FBgn0002527 | 7.91  | 7.4   | 8.79  | 7.57  | 7.38  | 7.39  |
| 1627494 s at | FBgn0011818 | 8.83  | 8.31  | 8.51  | 8.41  | 8.69  | 8.39  |
| 1639438 at   | FBgn0005617 | 7.99  | 7.47  | 7.47  | 7.33  | 7.85  | 7.42  |
| 1635182 at   | FBgn0011739 | 8.95  | 8.43  | 8.51  | 8.35  | 8.42  | 7.95  |
| 1629000 at   | ---         | 8.41  | 7.88  | 8.14  | 7.64  | 8.06  | 7.83  |
| 1628292 s at | FBgn0015234 | 9.5   | 8.97  | 9.05  | 9.15  | 9.52  | 8.81  |
| 1623349 x at | ---         | 7.99  | 7.46  | 8.11  | 6.44  | 7.55  | 7.43  |
| 1631321 s at | FBgn0051617 | 11.99 | 11.46 | 11.69 | 12.34 | 12.57 | 12.01 |
| 1629745 at   | FBgn0038922 | 9.07  | 8.53  | 8.67  | 8.79  | 9     | 8.05  |
| 1625688 at   | FBgn0037807 | 10.93 | 10.4  | 11.11 | 11.18 | 10.9  | 10.32 |
| 1634238 a at | FBgn0036433 | 8.33  | 7.79  | 8.53  | 7.53  | 8.07  | 7.88  |
| 1623957 s at | FBgn0010226 | 9.71  | 9.17  | 9.54  | 9.77  | 9.41  | 9.39  |
| 1625843 s at | FBgn0052940 | 7.73  | 7.19  | 7.9   | 6.94  | 7.42  | 7.04  |
| 1624881 at   | FBgn0024985 | 7.17  | 6.63  | 6.71  | 6.34  | 6.72  | 6.46  |
| 1640065 at   | ---         | 8.51  | 7.95  | 8.92  | 9.63  | 8.81  | 8.88  |
| 1641325 s at | FBgn0004117 | 7.84  | 7.28  | 9.08  | 7.3   | 8.01  | 7.73  |
| 1638811 at   | FBgn0036191 | 8.12  | 7.56  | 8.48  | 7.98  | 7.93  | 7.65  |
| 1640496 at   | FBgn0024320 | 9.11  | 8.55  | 8.77  | 8.4   | 8.53  | 8.25  |
| 1641408 at   | ---         | 7.21  | 6.64  | 7.51  | 6.85  | 6.93  | 6.44  |

|              |                         |       |      |       |       |       |       |
|--------------|-------------------------|-------|------|-------|-------|-------|-------|
| 1626446 a at | FBgn0002772             | 8.32  | 7.75 | 10.08 | 8.26  | 8.69  | 8.52  |
| 1625116 at   | FBgn0001402             | 7.55  | 6.99 | 8.2   | 6.86  | 7.19  | 7.03  |
| 1626233 at   | FBgn0031745             | 7.02  | 6.45 | 7.71  | 6.85  | 6.77  | 6.43  |
| 1639868 at   | FBgn0031117             | 9.63  | 9.07 | 9.44  | 9.6   | 9.93  | 9.3   |
| 1624549 at   | FBgn0027571             | 9.86  | 9.29 | 9.82  | 9.01  | 9.11  | 8.95  |
| 1626167 at   | FBgn0033174             | 7.41  | 6.84 | 7.28  | 7.38  | 7.55  | 6.7   |
| 1634336 at   | FBgn0000158             | 9.78  | 9.21 | 9.05  | 10.13 | 8.9   | 8.65  |
| 1625088 at   | ---                     | 9.72  | 9.14 | 9.4   | 9.33  | 9.61  | 9.03  |
| 1641476 a at | FBgn0025879             | 8.08  | 7.5  | 8.41  | 7.46  | 7.63  | 7.73  |
| 1641324 at   | FBgn0002526             | 8.56  | 7.99 | 9.53  | 8.14  | 7.81  | 7.99  |
| 1633566 at   | FBgn0038627 /// FBgn002 | 7.49  | 6.91 | 6.91  | 6.89  | 7.13  | 6.58  |
| 1636900 at   | FBgn0032213             | 7.42  | 6.84 | 7.39  | 7.03  | 8.17  | 7.48  |
| 1627593 at   | FBgn0014931             | 8.21  | 7.63 | 8.56  | 8.53  | 8.99  | 8.31  |
| 1631121 at   | FBgn0030079             | 9.59  | 9.01 | 9.25  | 9.02  | 9.31  | 9.08  |
| 1640223 a at | FBgn0001402             | 7.15  | 6.57 | 7.64  | 6.44  | 6.81  | 6.48  |
| 1629383 a at | FBgn0035917             | 7.88  | 7.29 | 8.37  | 7.2   | 7.77  | 7.37  |
| 1633534 s at | FBgn0037705             | 8.39  | 7.8  | 7.84  | 7.6   | 7.74  | 7.2   |
| 1633928 at   | FBgn0030438             | 9.67  | 9.08 | 8.72  | 9.18  | 9.48  | 9.62  |
| 1623471 s at | ---                     | 8.1   | 7.51 | 8.07  | 7.35  | 7.59  | 7.72  |
| 1629398 at   | FBgn0032699             | 8.68  | 8.08 | 8.39  | 8.71  | 8.68  | 7.85  |
| 1637430 s at | FBgn0030309             | 9.09  | 8.49 | 9.38  | 8.43  | 8.68  | 8.72  |
| 1623241 s at | ---                     | 7.7   | 7.09 | 8.01  | 6.68  | 7.2   | 7.33  |
| 1632901 s at | FBgn0000246             | 8.44  | 7.84 | 8.53  | 8.55  | 8.06  | 7.34  |
| 1638192 a at | ---                     | 8.37  | 7.76 | 8     | 8.08  | 8.18  | 7.9   |
| 1629181 at   | ---                     | 7.68  | 7.07 | 6.65  | 6.47  | 6.88  | 6.67  |
| 1636600 a at | FBgn0038294 /// FBgn002 | 8.72  | 8.11 | 9.33  | 7.89  | 8.62  | 8.11  |
| 1623256 at   | FBgn0034335             | 10.09 | 9.48 | 9.92  | 10.2  | 10.94 | 10.35 |
| 1636653 at   | FBgn0002930             | 7.04  | 6.42 | 6.08  | 5.69  | 6.58  | 5.99  |
| 1636764 at   | FBgn0051075             | 10.07 | 9.46 | 9.56  | 9.69  | 9.99  | 9.2   |
| 1638154 at   | FBgn0017448             | 8.63  | 8.01 | 7.69  | 8.22  | 7.73  | 6.61  |
| 1639142 s at | ---                     | 9.84  | 9.22 | 9.23  | 9.87  | 9.78  | 9.2   |
| 1628465 a at | FBgn0029876             | 8.77  | 8.15 | 8.68  | 8.81  | 7.97  | 7.99  |
| 1632712 s at | FBgn0038661             | 8.83  | 8.21 | 8.62  | 8.33  | 8.51  | 8.12  |
| 1635724 at   | FBgn0038658             | 7.91  | 7.29 | 8.63  | 7.14  | 7.44  | 7.6   |
| 1636461 at   | FBgn0023540             | 9.1   | 8.47 | 8.86  | 9.29  | 9.22  | 8.83  |
| 1637955 a at | FBgn0033431             | 7.11  | 6.48 | 7.2   | 7.45  | 7.16  | 6.43  |

|              |                         |       |       |       |       |       |       |
|--------------|-------------------------|-------|-------|-------|-------|-------|-------|
| 1626392 s at | FBgn0011656             | 7.35  | 6.73  | 6.89  | 5.37  | 6.5   | 6.84  |
| 1633826 at   | FBgn0031305             | 8.82  | 8.19  | 9.39  | 8.28  | 8     | 8.2   |
| 1626990 s at | FBgn0026061             | 8.03  | 7.4   | 8.62  | 7.62  | 7.78  | 7.74  |
| 1640945 at   | FBgn0005630             | 7.65  | 7.02  | 6.54  | 7.29  | 7.67  | 7.38  |
| 1639335 at   | ---                     | 7.03  | 6.4   | 7.54  | 6.73  | 6.04  | 6.38  |
| 1630728 a at | FBgn0033229 /// FBgn004 | 8.73  | 8.1   | 7     | 7.97  | 8.6   | 7.82  |
| 1632533 at   | FBgn0025879             | 8.3   | 7.67  | 8.51  | 7.67  | 7.78  | 7.78  |
| 1640844 s at | ---                     | 7.69  | 7.05  | 8.5   | 7.44  | 7.25  | 6.93  |
| 1631834 at   | ---                     | 8.54  | 7.89  | 8.63  | 8.55  | 8.58  | 8.02  |
| 1635273 s at | ---                     | 7.97  | 7.32  | 7.27  | 7.33  | 7.74  | 7.36  |
| 1629235 s at | FBgn0004028             | 9.49  | 8.84  | 10.7  | 9.07  | 9.67  | 9.42  |
| 1636352 at   | FBgn0031609             | 8.22  | 7.57  | 8.31  | 7.68  | 8.32  | 7.5   |
| 1640144 at   | FBgn0034512             | 7.9   | 7.25  | 8.12  | 6.93  | 7.41  | 6.96  |
| 1639944 at   | FBgn0038037 /// FBgn003 | 7.61  | 6.96  | 7.71  | 7.63  | 7.41  | 6.84  |
| 1637481 at   | FBgn0029114             | 8.42  | 7.77  | 8.62  | 8.12  | 8.76  | 8.09  |
| 1641552 at   | FBgn0010019             | 10.17 | 9.52  | 9.54  | 9.36  | 9.47  | 9.38  |
| 1634125 at   | ---                     | 7.42  | 6.76  | 8.47  | 7.69  | 8.59  | 7.99  |
| 1624505 at   | ---                     | 7.97  | 7.31  | 7.96  | 7.16  | 7.57  | 7.05  |
| 1632121 a at | FBgn0035917             | 8.61  | 7.95  | 9.33  | 7.9   | 8.44  | 7.98  |
| 1628083 at   | FBgn0028743             | 7.53  | 6.86  | 7.92  | 7.93  | 8.18  | 7.93  |
| 1635936 at   | FBgn0039098             | 9.11  | 8.44  | 8.65  | 9.64  | 8.66  | 7.98  |
| 1633010 s at | FBgn0026781             | 12.35 | 11.68 | 11.66 | 11.74 | 12.51 | 11.58 |
| 1636202 s at | FBgn0001257             | 9.72  | 9.05  | 9.48  | 9     | 9.15  | 9.01  |
| 1633059 at   | FBgn0033875             | 9.56  | 8.88  | 8.86  | 9     | 8.9   | 8.65  |
| 1630917 at   | FBgn0031003             | 9.58  | 8.9   | 9.44  | 9.64  | 9.71  | 9.2   |
| 1634257 at   | FBgn0030828             | 7.37  | 6.69  | 7.15  | 6.12  | 7.17  | 6.8   |
| 1624849 at   | FBgn0040752             | 9.2   | 8.52  | 9.18  | 9.03  | 9.1   | 8.53  |
| 1623281 s at | FBgn0061209             | 10.89 | 10.2  | 10.37 | 10.84 | 11.13 | 10.54 |
| 1633700 at   | ---                     | 10.19 | 9.51  | 10.01 | 10.39 | 10.27 | 9.48  |
| 1635666 at   | FBgn0061209             | 11.34 | 10.64 | 10.77 | 11.13 | 11.58 | 10.83 |
| 1637576 s at | FBgn0033717             | 9.29  | 8.59  | 8.86  | 8.66  | 8.93  | 8.47  |
| 1636835 at   | FBgn0030816             | 9.58  | 8.88  | 9.11  | 9.57  | 8.77  | 8.79  |
| 1627454 a at | FBgn0010434             | 7.49  | 6.78  | 6.99  | 7.01  | 6.94  | 6.65  |
| 1638912 s at | FBgn0001215             | 8.96  | 8.25  | 8.23  | 7.51  | 8.25  | 8.12  |
| 1636869 at   | ---                     | 7.9   | 7.18  | 7.93  | 7.22  | 7.36  | 7.18  |
| 1640565 at   | ---                     | 7.15  | 6.43  | 6.5   | 5.73  | 7.45  | 6.39  |

|              |                         |       |      |       |      |       |      |
|--------------|-------------------------|-------|------|-------|------|-------|------|
| 1626272 s at | FBgn0037515             | 7.98  | 7.26 | 7.88  | 7.92 | 8.03  | 7.69 |
| 1630509 at   | FBgn0002789             | 9.55  | 8.82 | 10.13 | 8.91 | 9.71  | 9.09 |
| 1635584 s at | FBgn0003721 /// FBgn000 | 9.03  | 8.3  | 9.95  | 8.33 | 9.32  | 8.9  |
| 1626171 at   | ---                     | 7.08  | 6.35 | 6.93  | 6.28 | 6.75  | 6.22 |
| 1632666 at   | FBgn0002528             | 8.37  | 7.63 | 8.96  | 7.73 | 7.53  | 7.69 |
| 1625514 s at | FBgn0041585             | 9.68  | 8.95 | 9.56  | 8.81 | 9.67  | 9.16 |
| 1627590 at   | FBgn0032897             | 10.37 | 9.62 | 9.79  | 9.43 | 10.16 | 9.85 |
| 1638143 a at | FBgn0032006             | 7.33  | 6.58 | 7.11  | 6.71 | 6.92  | 6.64 |
| 1628462 s at | FBgn0025836             | 9.64  | 8.89 | 9.51  | 9.45 | 9.41  | 9.09 |
| 1623690 at   | FBgn0038761             | 6.94  | 6.19 | 7.54  | 6.49 | 7.04  | 6.89 |
| 1624117 at   | FBgn0032723             | 8.13  | 7.38 | 7.73  | 8.3  | 8.16  | 7.31 |
| 1637322 at   | FBgn0003177             | 7.11  | 6.35 | 6.86  | 6.28 | 6.54  | 6.03 |
| 1627453 s at | FBgn0005672             | 9.27  | 8.51 | 9.08  | 8.97 | 8.84  | 8.56 |
| 1629195 at   | FBgn0032358             | 8.67  | 7.91 | 8.4   | 8.73 | 8.87  | 8.04 |
| 1634552 at   | FBgn0041180             | 8.86  | 8.1  | 8.74  | 7.58 | 8.31  | 7.74 |
| 1626724 at   | FBgn0052687             | 8.91  | 8.15 | 8.61  | 8.36 | 8.29  | 7.86 |
| 1628963 at   | FBgn0033820             | 9.49  | 8.73 | 7.75  | 7.69 | 9.08  | 8.61 |
| 1631154 at   | FBgn0033787             | 7.52  | 6.75 | 8.36  | 7.52 | 7.64  | 6.43 |
| 1632650 at   | FBgn0027586             | 7.79  | 7.03 | 8.53  | 7.04 | 7.84  | 7.33 |
| 1624725 at   | FBgn0037565             | 6.44  | 5.67 | 7.67  | 7.08 | 7.13  | 5.9  |
| 1629597 a at | FBgn0034075             | 6.99  | 6.22 | 7.01  | 6.85 | 7.54  | 8.39 |
| 1636015 s at | ---                     | 7.04  | 6.26 | 5.52  | 5.74 | 5.79  | 6.45 |
| 1630348 a at | FBgn0037007             | 10.12 | 9.34 | 10.15 | 9.49 | 9.98  | 9.51 |
| 1641413 s at | FBgn0034709             | 9.06  | 8.28 | 9.49  | 8.03 | 8.25  | 8.43 |
| 1626397 at   | FBgn0005666             | 6.96  | 6.18 | 8.44  | 7.13 | 7.22  | 6.52 |
| 1623459 at   | FBgn0028985             | 7.23  | 6.44 | 6.05  | 7.03 | 7.43  | 6.54 |
| 1636391 at   | FBgn0034180             | 8.7   | 7.92 | 7.93  | 8.56 | 8.29  | 7.91 |
| 1632639 at   | ---                     | 6.43  | 5.64 | 7.7   | 7.04 | 7.06  | 6.27 |
| 1638498 s at | FBgn0033188             | 8.41  | 7.61 | 8.4   | 7.83 | 8.24  | 7.75 |
| 1631783 at   | FBgn0031405             | 9.69  | 8.88 | 9.69  | 8.99 | 9.83  | 9    |
| 1635544 s at | ---                     | 8.08  | 7.28 | 8.72  | 7.51 | 8.19  | 7.63 |
| 1639489 at   | FBgn0034796             | 8.37  | 7.56 | 8.34  | 7.79 | 8.05  | 7.39 |
| 1623342 at   | ---                     | 8.4   | 7.58 | 7.45  | 7    | 8.06  | 7.28 |
| 1640379 s at | FBgn0034851             | 7.91  | 7.09 | 7.64  | 7.24 | 7.46  | 6.6  |
| 1635549 at   | ---                     | 7.36  | 6.53 | 5.04  | 3.62 | 5.27  | 6.66 |
| 1639229 at   | FBgn0016075             | 9.03  | 8.21 | 9.93  | 8.89 | 8.28  | 8.36 |

|              |                         |       |       |       |       |       |       |
|--------------|-------------------------|-------|-------|-------|-------|-------|-------|
| 1632873 at   | ---                     | 12.47 | 11.64 | 11.57 | 11.08 | 12.19 | 11.35 |
| 1623244 at   | FBgn0035835             | 7.43  | 6.6   | 6.71  | 6.23  | 7.23  | 6.62  |
| 1635199 at   | ---                     | 8.07  | 7.24  | 8.65  | 7.5   | 7.7   | 7.49  |
| 1629046 a at | FBgn0033820             | 9     | 8.17  | 7.29  | 7.25  | 8.46  | 8.06  |
| 1633245 at   | ---                     | 7.31  | 6.47  | 7.3   | 6.5   | 6.72  | 6.4   |
| 1623497 at   | FBgn0002609             | 7.13  | 6.29  | 7.67  | 7.32  | 7.2   | 6.84  |
| 1630150 s at | ---                     | 9.46  | 8.62  | 10.16 | 9.32  | 8.64  | 8.7   |
| 1640222 s at | FBgn0032156             | 7.6   | 6.76  | 7.84  | 7.1   | 7.5   | 6.66  |
| 1631105 at   | FBgn0027865             | 9.58  | 8.74  | 9.16  | 9.51  | 9.69  | 9.49  |
| 1624203 s at | FBgn0001987             | 7.04  | 6.18  | 7.11  | 6.57  | 6.28  | 6.31  |
| 1632623 at   | FBgn0000406             | 8.28  | 7.43  | 6.8   | 6.68  | 7.81  | 6.93  |
| 1630502 at   | FBgn0011746             | 7.95  | 7.08  | 8.42  | 6.83  | 7.11  | 6.91  |
| 1625825 at   | FBgn0026562             | 9.27  | 8.39  | 9.69  | 8.49  | 9     | 8.52  |
| 1631627 at   | FBgn0034365 /// FBgn000 | 9.29  | 8.41  | 9.29  | 8.75  | 9.47  | 8.57  |
| 1633935 at   | FBgn0050021             | 7.59  | 6.71  | 7.85  | 6.95  | 7.12  | 6.66  |
| 1641442 a at | FBgn0001402             | 7.78  | 6.9   | 8.66  | 7.25  | 7.02  | 7.09  |
| 1630014 at   | FBgn0034112             | 8.02  | 7.14  | 7.05  | 6.64  | 7     | 6.87  |
| 1636758 s at | FBgn0033229 /// FBgn004 | 10.35 | 9.46  | 8.61  | 9.54  | 10.05 | 9.17  |
| 1624839 at   | FBgn0001168             | 9.25  | 8.36  | 9.25  | 8.66  | 8.71  | 8.23  |
| 1637463 a at | FBgn0002968             | 8.7   | 7.79  | 8.15  | 8.21  | 8.24  | 7.91  |
| 1633556 s at | FBgn0020493             | 8.59  | 7.68  | 7.68  | 8.36  | 8.23  | 7.14  |
| 1631308 at   | FBgn0034420             | 9.26  | 8.34  | 8.36  | 8.41  | 8.53  | 8.21  |
| 1632945 at   | FBgn0051649             | 7.44  | 6.51  | 7.72  | 6.71  | 6.83  | 6.42  |
| 1635183 at   | FBgn0024293             | 8.47  | 7.53  | 7.08  | 6.86  | 7.95  | 7.06  |
| 1639109 a at | FBgn0023023             | 7.07  | 6.13  | 7.2   | 6.18  | 5.88  | 6.47  |
| 1636804 at   | FBgn0040398             | 8.15  | 7.18  | 6.68  | 6.15  | 7.45  | 6.78  |
| 1634388 at   | ---                     | 9.69  | 8.72  | 9.06  | 9.3   | 8.77  | 8.9   |
| 1625433 at   | ---                     | 7.9   | 6.93  | 5.21  | 5.49  | 7.08  | 5.5   |
| 1633304 at   | FBgn0030341             | 8.27  | 7.29  | 6.98  | 7.36  | 7.7   | 7.24  |
| 1636146 at   | FBgn0002968             | 9.08  | 8.09  | 8.81  | 8.67  | 8.66  | 8.42  |
| 1623782 at   | FBgn0033052             | 9.07  | 8.08  | 8.77  | 9.14  | 9.31  | 8.26  |
| 1633553 s at | FBgn0035710             | 7.48  | 6.47  | 7.37  | 6.7   | 7.08  | 6.46  |
| 1623761 at   | FBgn0030040             | 9.05  | 8.02  | 8.28  | 7.91  | 8.43  | 8.1   |
| 1629898 s at | FBgn0034420             | 7.61  | 6.58  | 6.72  | 6.32  | 7.08  | 6.43  |
| 1636001 at   | FBgn0034255             | 8.54  | 7.5   | 8.7   | 9.01  | 8.36  | 8.1   |
| 1638724 at   | FBgn0028527             | 7.12  | 6.07  | 6.23  | 6.12  | 6.61  | 6.02  |



|              |                         |       |      |      |       |       |      |
|--------------|-------------------------|-------|------|------|-------|-------|------|
| 1633391 at   | FBgn0038465             | 9.63  | 8.57 | 8.93 | 9.14  | 9.2   | 8.61 |
| 1627073 a at | FBgn0038088             | 8.08  | 7.02 | 7.49 | 7.16  | 7.83  | 7.51 |
| 1626867 at   | FBgn0051613             | 9.53  | 8.46 | 8.54 | 9.55  | 9.97  | 9.06 |
| 1636888 a at | FBgn0016123             | 9.37  | 8.29 | 9.44 | 9.22  | 8.98  | 8.16 |
| 1627324 at   | FBgn0005630             | 8.89  | 7.81 | 6.97 | 7.2   | 9.05  | 8.34 |
| 1638469 s at | FBgn0023520             | 7.07  | 5.98 | 6.24 | 5.76  | 6.61  | 5.46 |
| 1629518 at   | FBgn0032864             | 9.19  | 8.11 | 8.8  | 9.32  | 9.22  | 8.15 |
| 1634630 at   | FBgn0026593             | 7.93  | 6.84 | 7.19 | 7.47  | 8.08  | 7.16 |
| 1629803 a at | ---                     | 9.01  | 7.93 | 8.28 | 6.6   | 8.33  | 7.88 |
| 1624819 s at | ---                     | 9.54  | 8.46 | 3.78 | 4.96  | 10.76 | 9.93 |
| 1630948 s at | ---                     | 7.27  | 6.16 | 6.98 | 5.43  | 7.05  | 6.47 |
| 1636423 at   | ---                     | 8.37  | 7.25 | 8.41 | 6.47  | 8.18  | 7.88 |
| 1635191 at   | FBgn0029507             | 7.82  | 6.69 | 7.17 | 5.99  | 7.23  | 6.35 |
| 1641148 a at | FBgn0012034             | 10.4  | 9.26 | 9.52 | 9.83  | 10.06 | 8.83 |
| 1635283 at   | FBgn0028543             | 7.22  | 6.06 | 5.61 | 4.84  | 6.81  | 5.66 |
| 1632430 at   | ---                     | 7.86  | 6.7  | 7.23 | 6.34  | 6.44  | 6.63 |
| 1626113 at   | FBgn0035983             | 8.79  | 7.61 | 8.81 | 8.75  | 8.89  | 7.41 |
| 1640167 s at | FBgn0030179 /// FBgn002 | 9.32  | 8.08 | 8.44 | 6.68  | 8.45  | 8.43 |
| 1629834 at   | FBgn0036091             | 9.94  | 8.7  | 9.9  | 8.45  | 9.55  | 8.95 |
| 1637703 a at | FBgn0041184             | 7.72  | 6.46 | 7.68 | 6.93  | 7.41  | 6.64 |
| 1624720 s at | FBgn0032497             | 7.56  | 6.3  | 8.32 | 7.04  | 7.78  | 6.68 |
| 1638308 s at | FBgn0051613             | 9.69  | 8.42 | 8.84 | 9.54  | 10.13 | 9.06 |
| 1640703 at   | FBgn0050460             | 6.97  | 5.7  | 6.11 | 5.79  | 7.03  | 5.38 |
| 1640884 at   | FBgn0029766             | 7.2   | 5.93 | 6.37 | 6.58  | 6.55  | 5.98 |
| 1641610 at   | FBgn0030999             | 8.14  | 6.86 | 7.94 | 6.92  | 7.55  | 7.45 |
| 1641738 a at | ---                     | 9.69  | 8.39 | 8.21 | 9.96  | 9.76  | 8.18 |
| 1631217 a at | FBgn0010424             | 8.06  | 6.76 | 8.2  | 6.84  | 7.88  | 6.82 |
| 1638563 at   | FBgn0039431             | 7.51  | 6.18 | 7.54 | 6.56  | 7.11  | 6.51 |
| 1637900 at   | FBgn0039297             | 7.33  | 5.95 | 7.61 | 6.47  | 7.38  | 5.93 |
| 1628732 at   | ---                     | 8.02  | 6.57 | 8.08 | 8.19  | 8.81  | 7.96 |
| 1633645 at   | ---                     | 10.46 | 9    | 8.42 | 10.05 | 9.04  | 8    |
| 1633483 a at | FBgn0031037             | 9.39  | 7.9  | 9.93 | 9.59  | 9.32  | 8.26 |
| 1635110 at   | FBgn0033304             | 7.43  | 5.93 | 5.9  | 6.28  | 6.95  | 5.1  |
| 1629572 a at | FBgn0026721             | 7.22  | 5.7  | 5.35 | 5.29  | 6.55  | 5.55 |
| 1626547 at   | ---                     | 7.35  | 5.82 | 6.36 | 5.58  | 6.9   | 5.72 |
| 1629242 x at | ---                     | 7.41  | 5.85 | 5.89 | 6.3   | 6.89  | 6.1  |

|              |             |       |       |       |       |       |       |
|--------------|-------------|-------|-------|-------|-------|-------|-------|
| 1631604 at   | FBgn0031810 | 7.55  | 5.97  | 5.61  | 5.8   | 7.01  | 6.4   |
| 1634271 at   | ---         | 9.18  | 7.59  | 9.08  | 7.27  | 9.73  | 7.34  |
| 1635210 a at | FBgn0003137 | 6.99  | 5.4   | 8.93  | 6.86  | 7.99  | 6.96  |
| 1633893 at   | ---         | 7.12  | 5.51  | 5.81  | 5     | 7.48  | 5.81  |
| 1639723 at   | ---         | 8.96  | 7.35  | 9.5   | 8.74  | 9.47  | 7.97  |
| 1640303 a at | FBgn0035770 | 10.36 | 8.71  | 10.74 | 10.55 | 10.57 | 9.46  |
| 1628188 at   | FBgn0023184 | 11.8  | 10.11 | 11.49 | 10.14 | 11.66 | 10.37 |
| 1641727 at   | ---         | 6.12  | 4.42  | 5.19  | 6.9   | 7.01  | 4.41  |
| 1635020 s at | FBgn0016054 | 8.13  | 6.42  | 7.56  | 9.53  | 8.03  | 6.32  |
| 1630985 at   | FBgn0050441 | 7.17  | 5.38  | 5.86  | 4.98  | 6.25  | 4.25  |
| 1630934 at   | ---         | 10.26 | 8.46  | 8.66  | 8.28  | 10.52 | 9.45  |
| 1638669 at   | FBgn0034200 | 7.66  | 5.84  | 5.17  | 5.27  | 6.83  | 5.23  |
| 1626473 a at | FBgn0032773 | 8.21  | 6.36  | 6.16  | 5.77  | 7.8   | 6.06  |
| 1632683 s at | ---         | 13.52 | 11.63 | 10.34 | 10.86 | 12.93 | 11.84 |
| 1626350 at   | FBgn0015569 | 7.39  | 5.49  | 6.14  | 6.53  | 7.86  | 5.76  |
| 1632932 a at | FBgn0053171 | 8.19  | 6.25  | 7.9   | 8.12  | 7.63  | 6.24  |
| 1639180 at   | FBgn0033926 | 10.41 | 8.45  | 11.37 | 10.56 | 9.93  | 8.56  |
| 1630831 at   | FBgn0038631 | 7.38  | 5.4   | 4.98  | 5.47  | 6.21  | 5     |
| 1626531 at   | FBgn0031655 | 7.94  | 5.87  | 7.79  | 5.84  | 8.11  | 6.03  |
| 1638844 s at | FBgn0031589 | 7.73  | 5.63  | 8.73  | 5.89  | 7.92  | 5.65  |
| 1634762 a at | FBgn0034394 | 8.77  | 6.65  | 6.83  | 6.16  | 7.74  | 6.32  |
| 1627551 s at | ---         | 8.09  | 5.92  | 5.15  | 5.17  | 7.52  | 6.4   |
| 1640103 s at | FBgn0031489 | 8.3   | 5.99  | 6.93  | 5.53  | 9.22  | 7.03  |
| 1628690 at   | FBgn0031157 | 7.28  | 4.95  | 7.06  | 6.88  | 7.81  | 6.57  |
| 1629434 at   | FBgn0035094 | 7.11  | 4.75  | 5.22  | 5.02  | 6.88  | 4.23  |
| 1641382 at   | FBgn0011660 | 8.38  | 5.93  | 8.23  | 8.55  | 8.54  | 7.92  |
| 1641723 a at | FBgn0035976 | 7.29  | 4.84  | 4.97  | 4.3   | 7.29  | 4.75  |
| 1625947 at   | ---         | 7.95  | 5.41  | 7.59  | 5.12  | 8.37  | 5.32  |
| 1625491 at   | ---         | 7.86  | 5.24  | 7.48  | 7.23  | 7.48  | 6.22  |
| 1641367 at   | ---         | 7.06  | 3.82  | 4.48  | 3     | 6.26  | 4.54  |
| 1637275 a at | FBgn0033857 | 8.66  | 5.27  | 7.54  | 5.02  | 6.34  | 5.62  |
| 1628918 at   | FBgn0032998 | 7.61  | 4.09  | 8.21  | 6.68  | 8.36  | 3.16  |
| 1639054 s at | ---         | 9     | 5.34  | 5.45  | 6.52  | 8.83  | 4.6   |
| 1633290 a at | FBgn0028528 | 9.55  | 4.36  | 9.44  | 9.63  | 9.66  | 4.66  |

**Supplementary Table S8** Enrichment in biological process GO-terms (all levels) of differentially expressed genes ( $q < 0.05$ ) between *Marcal1<sup>del/del</sup>* and *yw* ovaries at 20°C.

| Term                                       | Count | PValue      | Fold Enrichment |
|--------------------------------------------|-------|-------------|-----------------|
| GO:0008152~metabolic process               | 50    | 0.077378231 | 1.168941048     |
| GO:0016043~cellular component organization | 24    | 0.04586477  | 1.453506787     |
| GO:0006950~response to stress              | 9     | 0.073882931 | 2.00765625      |
| GO:0009056~catabolic process               | 9     | 0.084881356 | 1.946818182     |
| GO:0051716~cellular response to stimulus   | 7     | 0.037973165 | 2.776018519     |
| GO:0006259~DNA metabolic process           | 6     | 0.052919286 | 2.907013575     |
| GO:0033554~cellular response to stress     | 5     | 0.079115927 | 3.041903409     |
| GO:0006281~DNA repair                      | 4     | 0.067768971 | 4.199019608     |
| GO:0006974~response to DNA damage stimulus | 4     | 0.089674196 | 3.724347826     |

**Supplementary Table S9** Enrichment in biological process GO-terms (all levels) of differentially expressed genes ( $q < 0.05$ ) between *Marcal1<sup>del/del</sup>* and *yw* ovaries at 25°C.

| <b>Term</b>                                      | <b>Count</b> | <b>PValue</b> | <b>Fold Enrichment</b> |
|--------------------------------------------------|--------------|---------------|------------------------|
| GO:0008152~metabolic process                     | 58           | 0.096794378   | 1.141870834            |
| GO:0006950~response to stress                    | 11           | 0.03703737    | 2.066359649            |
| GO:0033036~macromolecule localization            | 11           | 0.053968425   | 1.933435929            |
| GO:0008104~protein localization                  | 10           | 0.027665154   | 2.300214823            |
| GO:0009888~tissue development                    | 10           | 0.054081143   | 2.030820294            |
| GO:0002009~morphogenesis of an epithelium        | 8            | 0.011638694   | 3.205988304            |
| GO:0060429~epithelium development                | 8            | 0.014511411   | 3.06956327             |
| GO:0048729~tissue morphogenesis                  | 8            | 0.018591517   | 2.92043469             |
| GO:0002164~larval development                    | 4            | 0.038431652   | 5.304024768            |
| GO:0032787~monocarboxylic acid metabolic process | 4            | 0.084146882   | 3.836954087            |
| GO:0002168~instar larval development             | 3            | 0.097172331   | 5.635526316            |

**Supplementary Table S10** Log<sub>2</sub> scale value of mRNA expression in *wt* and *Smarcal1<sup>del/del</sup>* mouse livers at 20°C and at 39.5°C.

| ENSEMBL            | SYMBOL           | <i>wt</i> (20°C) | <i>Smarcal1<sup>del/del</sup></i> (20°C) | <i>wt</i> (39.5°C) | <i>Smarcal1<sup>del/del</sup></i> (39.5°C) |
|--------------------|------------------|------------------|------------------------------------------|--------------------|--------------------------------------------|
| ENSMUSG00000000001 | <i>Gnai3</i>     | 5.91             | 5.22                                     | 5.51               | 5.19                                       |
| ENSMUSG00000000031 | <i>NA</i>        | -2.33            | -3.5                                     | 1.1                | 1.34                                       |
| ENSMUSG00000000049 | <i>ApoH</i>      | 11.01            | 10.64                                    | 10.65              | 10.75                                      |
| ENSMUSG00000000056 | <i>Narf</i>      | 4.51             | 3.92                                     | 4.33               | 4.11                                       |
| ENSMUSG00000000058 | <i>Cav2</i>      | 1.51             | 0.16                                     | 0.59               | 0.22                                       |
| ENSMUSG00000000078 | <i>Klf6</i>      | 2.24             | 1.3                                      | 2.36               | 2.05                                       |
| ENSMUSG00000000085 | <i>scmh1</i>     | 2.19             | 2.39                                     | 2.55               | 2.25                                       |
| ENSMUSG00000000088 | <i>Cox5a</i>     | 7.13             | 6.86                                     | 7.2                | 6.94                                       |
| ENSMUSG00000000120 | <i>Ngfr</i>      | 0.47             | 2.32                                     | 1.36               | 0.8                                        |
| ENSMUSG00000000127 | <i>Fert2</i>     | 1.7              | 1.2                                      | 1.77               | 1.2                                        |
| ENSMUSG00000000131 | <i>mKIAA0370</i> | 4                | 4.25                                     | 4.16               | 3.88                                       |
| ENSMUSG00000000134 | <i>Tcfe3</i>     | 3.76             | 4                                        | 3.84               | 3.87                                       |
| ENSMUSG00000000142 | <i>Axin2</i>     | 1.61             | 1.9                                      | 1.67               | 1.51                                       |
| ENSMUSG00000000148 | <i>AA881470</i>  | 2.02             | 2.61                                     | 2.5                | 2.3                                        |
| ENSMUSG00000000149 | <i>Gna12</i>     | 5.51             | 6.13                                     | 6.18               | 6                                          |
| ENSMUSG00000000154 | <i>Slc22a18</i>  | 6.47             | 6.84                                     | 6.72               | 6.52                                       |
| ENSMUSG00000000159 | <i>Igsf5</i>     | 3.45             | 3.38                                     | 3.2                | 3.29                                       |
| ENSMUSG00000000168 | <i>Dlat</i>      | 4.41             | 4.12                                     | 4.22               | 3.67                                       |
| ENSMUSG00000000171 | <i>Sdhd</i>      | 7.19             | 6.96                                     | 7.13               | 6.88                                       |
| ENSMUSG00000000184 | <i>Ccnd2</i>     | 1.76             | 2.64                                     | 1.71               | 1.47                                       |
| ENSMUSG00000000194 | <i>Gpr107</i>    | 3.2              | 3.43                                     | 3.19               | 2.75                                       |
| ENSMUSG00000000247 | <i>Lhx2</i>      | 1.61             | 1.46                                     | 1.1                | 0.67                                       |
| ENSMUSG00000000266 | <i>Mid2</i>      | 0.69             | 0.35                                     | 1.11               | 0.69                                       |
| ENSMUSG00000000275 | <i>Trim25</i>    | 4.53             | 4.18                                     | 4.16               | 4.08                                       |
| ENSMUSG00000000278 | <i>Scpep1</i>    | 5.83             | 5.38                                     | 5.6                | 5.37                                       |
| ENSMUSG00000000282 | <i>Mnt</i>       | 1.54             | 2.15                                     | 1.76               | 1.06                                       |
| ENSMUSG00000000290 | <i>Itgb2</i>     | 1.58             | 2.01                                     | 1.98               | 1.3                                        |
| ENSMUSG00000000296 | <i>mD53</i>      | 3.12             | 2.09                                     | 3.02               | 2.6                                        |

|                    |                 |      |      |      |      |
|--------------------|-----------------|------|------|------|------|
| ENSMUSG00000000301 | <i>Pemt</i>     | 8.51 | 8.85 | 8.83 | 8.83 |
| ENSMUSG00000000303 | <i>Cdh1</i>     | 2.8  | 2.76 | 2.83 | 2.55 |
| ENSMUSG00000000325 | <i>Arvcf</i>    | 2.77 | 2.97 | 2.75 | 2.72 |
| ENSMUSG00000000326 | <i>Comt</i>     | 8.23 | 9.06 | 8.33 | 8.38 |
| ENSMUSG00000000339 | <i>BC051062</i> | 2.93 | 2.71 | 2.53 | 2.53 |
| ENSMUSG00000000340 | <i>Dbt</i>      | 6.4  | 5.56 | 6.09 | 5.48 |
| ENSMUSG00000000346 | <i>Dazap2</i>   | 6.46 | 6.52 | 6.4  | 6.15 |
| ENSMUSG00000000355 | <i>Mctsl</i>    | 4.83 | 3.16 | 4.39 | 3.64 |
| ENSMUSG00000000374 | <i>Tmem1</i>    | 3.28 | 3.42 | 3.25 | 2.76 |
| ENSMUSG00000000378 | <i>Ccm2</i>     | 3.08 | 3.81 | 3.27 | 3.13 |
| ENSMUSG00000000384 | <i>Tbrg4</i>    | 3.82 | 4.48 | 4.34 | 4.04 |
| ENSMUSG00000000385 | <i>Imprss2</i>  | 2.77 | 2.63 | 2.73 | 1.98 |
| ENSMUSG00000000399 | <i>Ndufa9</i>   | 6.84 | 6.85 | 6.91 | 6.57 |
| ENSMUSG00000000420 | <i>Galnt1</i>   | 4.87 | 4.3  | 4.37 | 3.8  |
| ENSMUSG00000000439 | <i>Mkrn2</i>    | 3.06 | 3.23 | 3.23 | 3.04 |
| ENSMUSG00000000440 | <i>Pparg</i>    | 2.07 | 1.49 | 2.5  | 1.86 |
| ENSMUSG00000000441 | <i>Raf1</i>     | 5.41 | 5.41 | 5.33 | 5.22 |
| ENSMUSG00000000532 | <i>Acvr1b</i>   | 1.66 | 2.07 | 2.11 | 1.34 |
| ENSMUSG00000000538 | <i>Tom1l2</i>   | 2.95 | 3.09 | 3.41 | 2.89 |
| ENSMUSG00000000552 | <i>Zfp385</i>   | 2.9  | 3.44 | 3.26 | 3.11 |
| ENSMUSG00000000555 | <i>Itga5</i>    | 3.1  | 4.32 | 3.09 | 3.24 |
| ENSMUSG00000000561 | <i>Wdr77</i>    | 3.76 | 4.42 | 4.01 | 3.6  |
| ENSMUSG00000000563 | <i>Atp5fl</i>   | 6.65 | 5.75 | 6.37 | 5.34 |
| ENSMUSG00000000568 | <i>Hnrpd</i>    | 4.15 | 4.06 | 4.35 | 3.76 |
| ENSMUSG00000000581 | <i>C1d</i>      | 4.21 | 3.03 | 3.92 | 3.22 |
| ENSMUSG00000000594 | <i>Gm2a</i>     | 7.08 | 6.85 | 7.33 | 6.96 |
| ENSMUSG00000000600 | <i>BC099422</i> | 3.1  | 2.09 | 2.55 | 2.33 |
| ENSMUSG00000000605 | <i>Clcn4-2</i>  | 4.57 | 4.23 | 4.33 | 3.83 |
| ENSMUSG00000000631 | <i>Myo18a</i>   | 3.81 | 4.39 | 4.08 | 4.04 |
| ENSMUSG00000000673 | <i>Hao</i>      | 8.47 | 9.03 | 8.81 | 8.62 |
| ENSMUSG00000000682 | <i>Cd52</i>     | 3.05 | 1.99 | 3.84 | 2.99 |

|                    |                     |      |      |      |      |
|--------------------|---------------------|------|------|------|------|
| ENSMUSG00000000686 | <i>I300007F04Ri</i> | 4.86 | 5.19 | 4.94 | 4.32 |
| ENSMUSG00000000708 | <i>Pcaf</i>         | 4.67 | 3.9  | 4.47 | 4    |
| ENSMUSG00000000711 | <i>AK206637</i>     | 4.26 | 4.29 | 4.21 | 4.01 |
| ENSMUSG00000000738 | <i>Spg7</i>         | 4.22 | 4.52 | 4.36 | 3.74 |
| ENSMUSG00000000739 | <i>Sult5a1</i>      | 4.82 | 3.59 | 3.56 | 3.52 |
| ENSMUSG00000000740 | <i>Rpl13</i>        | 1.11 | 0.86 | 1.21 | 0.99 |
| ENSMUSG00000000743 | <i>Chmp1a</i>       | 4.51 | 5.02 | 4.67 | 4.49 |
| ENSMUSG00000000751 | <i>Rpa1</i>         | 3.98 | 3.53 | 4.03 | 3.62 |
| ENSMUSG00000000753 | <i>Serpinf1</i>     | 9.2  | 9.61 | 9.4  | 9.35 |
| ENSMUSG00000000759 | <i>Tubgcp3</i>      | 1.71 | 1.46 | 1.34 | 1.17 |
| ENSMUSG00000000776 | <i>Polr3d</i>       | 1.86 | 3.07 | 2.22 | 2.25 |
| ENSMUSG00000000782 | <i>Tcf7</i>         | 1.68 | 2.15 | 2.27 | 1.65 |
| ENSMUSG00000000787 | <i>Ddx3x</i>        | 6.66 | 5.74 | 6.03 | 5.8  |
| ENSMUSG00000000804 | <i>Usp32</i>        | 3.46 | 2.37 | 3.02 | 2.36 |
| ENSMUSG00000000811 | <i>Txnrd3</i>       | 1.48 | 1.97 | 1.5  | 1.1  |
| ENSMUSG00000000823 | <i>NA</i>           | 2.38 | 2.61 | 2.58 | 2.29 |
| ENSMUSG00000000826 | <i>Dnajc5</i>       | 4.4  | 4.3  | 4.15 | 4.01 |
| ENSMUSG00000000827 | <i>Tpd52l2</i>      | 3.1  | 3.35 | 3.39 | 2.93 |
| ENSMUSG00000000838 | <i>Fmr1</i>         | 3.12 | 2.07 | 2.8  | 1.8  |
| ENSMUSG00000000876 | <i>Pxmp4</i>        | 6.62 | 6.59 | 6.03 | 5.97 |
| ENSMUSG00000000881 | <i>Dlg3</i>         | 2.65 | 2.54 | 2.58 | 1.95 |
| ENSMUSG00000000902 | <i>Smrcb1</i>       | 3.54 | 4.37 | 3.65 | 3.87 |
| ENSMUSG00000000915 | <i>Hip1r</i>        | 2.88 | 3.56 | 2.84 | 2.83 |
| ENSMUSG00000000916 | <i>Nsun5</i>        | 2.29 | 3.17 | 2.67 | 2.34 |
| ENSMUSG00000000934 | <i>Top1mt</i>       | 3.87 | 4.39 | 3.91 | 3.74 |
| ENSMUSG00000000948 | <i>Snurf</i>        | 2.75 | 2.75 | 2.69 | 2.14 |
| ENSMUSG00000000957 | <i>Mmp14</i>        | 3.69 | 4.57 | 3.7  | 4.15 |
| ENSMUSG00000000958 | <i>Slc7a7</i>       | 1.57 | 1.78 | 1.37 | 0.93 |
| ENSMUSG00000000959 | <i>Oxal1</i>        | 5.61 | 6.19 | 6.03 | 6.05 |
| ENSMUSG00000000976 | <i>Heatr6</i>       | 1.72 | 2.2  | 2.13 | 1.99 |
| ENSMUSG00000001016 | <i>Ilf2</i>         | 3.26 | 2.82 | 3.44 | 3.04 |

|                    |                    |      |       |      |      |
|--------------------|--------------------|------|-------|------|------|
| ENSMUSG00000001017 | <i>MNCb-1706</i>   | 4.2  | 3.73  | 4.02 | 3.56 |
| ENSMUSG00000001018 | <i>Snapap</i>      | 3.05 | 2.41  | 3.24 | 2.48 |
| ENSMUSG00000001029 | <i>Icam2</i>       | 0.95 | 1.32  | 1.23 | 1.36 |
| ENSMUSG00000001036 | <i>Epn2</i>        | 1.74 | 1.68  | 1.77 | 1.53 |
| ENSMUSG00000001052 | <i>Sec24b</i>      | 3.08 | 2.94  | 3.28 | 2.86 |
| ENSMUSG00000001053 | <i>C330016O10R</i> | 1.02 | 2.87  | 1.2  | 1.02 |
| ENSMUSG00000001054 | <i>Rmnd5b</i>      | 3.15 | 4.05  | 3.67 | 3.16 |
| ENSMUSG00000001056 | <i>Nola2</i>       | 3.84 | 4.87  | 4.55 | 4.34 |
| ENSMUSG00000001062 | <i>NA</i>          | 3.33 | 3.59  | 3.23 | 3.05 |
| ENSMUSG00000001065 | <i>Zfp276</i>      | 3    | 3.29  | 3.33 | 2.98 |
| ENSMUSG00000001089 | <i>Luzp1</i>       | 2.57 | 2.16  | 2    | 2.02 |
| ENSMUSG00000001095 | <i>Slc13a2</i>     | 1.19 | 1.22  | 1.87 | 0.44 |
| ENSMUSG00000001098 | <i>Kctd10</i>      | 3    | 3.24  | 2.66 | 2.52 |
| ENSMUSG00000001100 | <i>Poldip2</i>     | 6.12 | 6.08  | 5.96 | 5.73 |
| ENSMUSG00000001105 | <i>Ift20</i>       | 5.58 | 5.2   | 5.74 | 5.64 |
| ENSMUSG00000001119 | <i>Col6a1</i>      | 1.01 | 1.49  | 1.27 | 1.31 |
| ENSMUSG00000001123 | <i>Lgals9</i>      | 9.28 | 9.32  | 9.11 | 9    |
| ENSMUSG00000001127 | <i>Araf</i>        | 4.2  | 4.81  | 4.34 | 4.14 |
| ENSMUSG00000001128 | <i>Cfp</i>         | 4.25 | 4.57  | 4.41 | 4    |
| ENSMUSG00000001134 | <i>Uxt</i>         | 1.32 | -0.41 | 0.53 | 0.72 |
| ENSMUSG00000001138 | <i>Cnnm3</i>       | 2.99 | 3.33  | 2.96 | 2.33 |
| ENSMUSG00000001143 | <i>Lman2l</i>      | 3.68 | 3.8   | 3.36 | 3.52 |
| ENSMUSG00000001150 | <i>Mcm3ap</i>      | 2.19 | 2.47  | 2.2  | 2.28 |
| ENSMUSG00000001151 | <i>Pent</i>        | 1.2  | 0.86  | 1.18 | 0.82 |
| ENSMUSG00000001155 | <i>Ftcd</i>        | 7.12 | 7.51  | 7.46 | 7.29 |
| ENSMUSG00000001156 | <i>Mxd1</i>        | 1.02 | 1.07  | 1.45 | 1.19 |
| ENSMUSG00000001157 | <i>Gmcl1</i>       | 2.65 | 2.19  | 2.34 | 1.86 |
| ENSMUSG00000001158 | <i>2610209M04R</i> | 3.69 | 3.14  | 3.69 | 2.81 |
| ENSMUSG00000001173 | <i>Ocrl</i>        | 1.25 | 1.07  | 1.25 | 0.74 |
| ENSMUSG00000001175 | <i>Calm1</i>       | 7.36 | 7.16  | 7.11 | 6.71 |
| ENSMUSG00000001211 | <i>Agpat3</i>      | 6.4  | 6.51  | 6.58 | 6.18 |



|                    |                     |       |       |      |       |
|--------------------|---------------------|-------|-------|------|-------|
| ENSMUSG00000001229 | <i>Dpp9</i>         | 5.45  | 6.11  | 5.16 | 5.03  |
| ENSMUSG00000001240 | <i>Ramp2</i>        | 3.96  | 4.19  | 3.82 | 3.64  |
| ENSMUSG00000001247 | <i>Lsr</i>          | 6.51  | 7.35  | 6.56 | 6.58  |
| ENSMUSG00000001248 | <i>Gramd1a</i>      | 1.68  | 2.52  | 2.25 | 2.2   |
| ENSMUSG00000001249 | <i>Hpn</i>          | 7.74  | 8.38  | 8.28 | 8.06  |
| ENSMUSG00000001280 | <i>Spl</i>          | 3.68  | 2.95  | 3.25 | 2.73  |
| ENSMUSG00000001285 | <i>Myg1</i>         | 3.6   | 4.21  | 4.09 | 4.01  |
| ENSMUSG00000001289 | <i>Pfdn5</i>        | 4.7   | 4.81  | 4.7  | 4.77  |
| ENSMUSG00000001305 | <i>Rrp15</i>        | 3.14  | 3.84  | 3.1  | 2.72  |
| ENSMUSG00000001313 | <i>Rnd2</i>         | 2.64  | 3.72  | 3.35 | 2.56  |
| ENSMUSG00000001323 | <i>Srr</i>          | 6.14  | 5.86  | 5.76 | 5.57  |
| ENSMUSG00000001348 | <i>Acp5</i>         | 6.28  | 6.76  | 6.5  | 6.53  |
| ENSMUSG00000001366 | <i>Fbxo9</i>        | 5.34  | 5.16  | 5.32 | 5.05  |
| ENSMUSG00000001376 | <i>1700034M03R</i>  | 2.14  | 1.58  | 1.89 | 1.73  |
| ENSMUSG00000001379 | <i>Apbb3</i>        | 3.35  | 2.93  | 2.92 | 2.71  |
| ENSMUSG00000001380 | <i>Hars</i>         | 4.59  | 4.96  | 4.39 | 4.53  |
| ENSMUSG00000001383 | <i>Zmat2</i>        | 5.45  | 5.11  | 5.13 | 5.3   |
| ENSMUSG00000001403 | <i>Ube2c</i>        | -0.02 | -0.47 | 1.35 | -0.69 |
| ENSMUSG00000001415 | <i>Smg5</i>         | 3.24  | 3.86  | 3.45 | 3.46  |
| ENSMUSG00000001416 | <i>Cct3</i>         | 5.57  | 6.15  | 5.61 | 5.51  |
| ENSMUSG00000001417 | <i>Rhbg</i>         | 3.35  | 3.13  | 3.73 | 2.96  |
| ENSMUSG00000001418 | <i>0610031J06Ri</i> | 5.41  | 5.94  | 5.65 | 5.59  |
| ENSMUSG00000001419 | <i>Mef2d</i>        | 2.88  | 3.31  | 3.18 | 3.15  |
| ENSMUSG00000001424 | <i>Snd1</i>         | 5.6   | 5.9   | 5.41 | 5.58  |
| ENSMUSG00000001435 | <i>Coll8a1</i>      | 7.39  | 8.05  | 7.86 | 7.67  |
| ENSMUSG00000001436 | <i>Slc19a1</i>      | 2.22  | 3     | 2.95 | 2.47  |
| ENSMUSG00000001440 | <i>Kpnb1</i>        | 5.09  | 4.88  | 4.8  | 4.4   |
| ENSMUSG00000001441 | <i>Npepps</i>       | 3.59  | 3.13  | 3.68 | 3.12  |
| ENSMUSG00000001445 | <i>Mrpl10</i>       | 5.31  | 5.69  | 5.3  | 5.24  |
| ENSMUSG00000001467 | <i>Cyp51</i>        | 5.78  | 4.75  | 4.38 | 3.85  |
| ENSMUSG00000001472 | <i>Tcf25</i>        | 5.65  | 6.12  | 5.66 | 5.52  |

|                    |                  |       |      |       |      |
|--------------------|------------------|-------|------|-------|------|
| ENSMUSG00000001473 | <i>Tubb6</i>     | 2.54  | 2.83 | 2.86  | 2.44 |
| ENSMUSG00000001482 | <i>Def8</i>      | 3.67  | 3.85 | 3.96  | 3.64 |
| ENSMUSG00000001507 | <i>Itga3</i>     | 1.07  | 1.27 | 1.32  | 1.2  |
| ENSMUSG00000001518 | <i>Itfg2</i>     | 1.74  | 2.49 | 2.4   | 2.15 |
| ENSMUSG00000001524 | <i>Gtf2h4</i>    | 2.86  | 3.69 | 3.47  | 3.26 |
| ENSMUSG00000001525 | <i>Tubb5</i>     | 5.47  | 5.9  | 5.57  | 5.65 |
| ENSMUSG00000001542 | <i>Ell2</i>      | 5.8   | 4.71 | 5.45  | 5.05 |
| ENSMUSG00000001552 | <i>Jup</i>       | 4.67  | 5.43 | 5.07  | 4.75 |
| ENSMUSG00000001569 | <i>Gm1040</i>    | 3.31  | 3.18 | 2.98  | 2.52 |
| ENSMUSG00000001576 | <i>Ergic1</i>    | 5.5   | 5.83 | 5.5   | 5.42 |
| ENSMUSG00000001604 | <i>Tcea3</i>     | 4.74  | 5.31 | 5.33  | 4.35 |
| ENSMUSG00000001627 | <i>Ifrd1</i>     | 3.63  | 2.88 | 3.88  | 4.12 |
| ENSMUSG00000001630 | <i>Stk38l</i>    | 1.55  | 0.94 | 1.73  | 1.51 |
| ENSMUSG00000001632 | <i>Brpfl</i>     | 2.24  | 2.81 | 2.46  | 2.43 |
| ENSMUSG00000001663 | <i>Gstt1</i>     | 7.54  | 8.01 | 7.86  | 7.56 |
| ENSMUSG00000001665 | <i>Gstt3</i>     | 7.16  | 6.88 | 7.27  | 6.79 |
| ENSMUSG00000001666 | <i>Ddt</i>       | 8.2   | 8.43 | 8.51  | 8.36 |
| ENSMUSG00000001670 | <i>Tat</i>       | 10.16 | 10.2 | 10.63 | 10.5 |
| ENSMUSG00000001687 | <i>Ubl3</i>      | 5.56  | 5.01 | 5.43  | 5.18 |
| ENSMUSG00000001700 | <i>Gramd3</i>    | 4.27  | 3.96 | 4.46  | 3.94 |
| ENSMUSG00000001707 | <i>Eef1e1</i>    | 3.52  | 3.14 | 3.54  | 3.28 |
| ENSMUSG00000001729 | <i>Akt1</i>      | 4.66  | 5.16 | 4.5   | 4.63 |
| ENSMUSG00000001750 | <i>Tcirg1</i>    | 3.76  | 4.14 | 3.85  | 3.47 |
| ENSMUSG00000001751 | <i>Naglu</i>     | 4.32  | 4.88 | 4.57  | 4.4  |
| ENSMUSG00000001755 | <i>Coasy</i>     | 5.87  | 6.32 | 5.99  | 5.83 |
| ENSMUSG00000001761 | <i>AK053708</i>  | 1.68  | 2.46 | 1.25  | 1.3  |
| ENSMUSG00000001763 | <i>Tspan33</i>   | 2.61  | 3.92 | 2.82  | 3.1  |
| ENSMUSG00000001767 | <i>Crnk1l</i>    | 3.09  | 2.43 | 2.49  | 1.83 |
| ENSMUSG00000001768 | <i>Rin2</i>      | 1.92  | 1.58 | 1.58  | 1.29 |
| ENSMUSG00000001774 | <i>Chordc1</i>   | 5.39  | 4.73 | 4.66  | 4.5  |
| ENSMUSG00000001783 | <i>D10Wsu52e</i> | 5.3   | 5.3  | 5.08  | 5.02 |

|                    |                     |      |      |      |      |
|--------------------|---------------------|------|------|------|------|
| ENSMUSG00000001785 | <i>Pwp1</i>         | 3.04 | 3.17 | 3.01 | 2.84 |
| ENSMUSG00000001786 | <i>Fbxo7</i>        | 3.63 | 3.76 | 3.75 | 3.71 |
| ENSMUSG00000001794 | <i>Capns1</i>       | 6.29 | 6.73 | 6.48 | 6.38 |
| ENSMUSG00000001802 | <i>Lrp3</i>         | 2.23 | 2.96 | 2.61 | 2.64 |
| ENSMUSG00000001829 | <i>Clpb</i>         | 4.56 | 5.09 | 4.7  | 4.36 |
| ENSMUSG00000001833 | <i>7-Sep</i>        | 5.31 | 3.9  | 4.44 | 3.92 |
| ENSMUSG00000001844 | <i>Zdhhc4</i>       | 4.08 | 4.45 | 4.02 | 3.82 |
| ENSMUSG00000001847 | <i>Rac1</i>         | 5.79 | 6.18 | 5.89 | 5.7  |
| ENSMUSG00000001855 | <i>Nup214</i>       | 1.39 | 1.99 | 1.99 | 1.6  |
| ENSMUSG00000001891 | <i>Ugp2</i>         | 8.15 | 6.85 | 7.91 | 7.27 |
| ENSMUSG00000001909 | <i>Trmt1</i>        | 3.67 | 4.38 | 4.06 | 3.74 |
| ENSMUSG00000001910 | <i>Btbd14b</i>      | 3.1  | 3.7  | 3.13 | 3.06 |
| ENSMUSG00000001911 | <i>Nfix</i>         | 4.23 | 4.82 | 4.81 | 4.72 |
| ENSMUSG00000001924 | <i>Ube1x</i>        | 6.24 | 6.16 | 6.05 | 5.99 |
| ENSMUSG00000001942 | <i>Siae</i>         | 4.57 | 4.42 | 4.64 | 4.13 |
| ENSMUSG00000001946 | <i>Esam1</i>        | 3.04 | 3.77 | 3.16 | 3.14 |
| ENSMUSG00000001948 | <i>Spa17</i>        | 0.97 | 0.29 | 1.2  | 0.71 |
| ENSMUSG00000001962 | <i>D0HXS9928E</i>   | 3.55 | 4.11 | 3.7  | 3.91 |
| ENSMUSG00000001964 | <i>Emd</i>          | 3.51 | 3.71 | 3.68 | 3.75 |
| ENSMUSG00000001983 | <i>Ccdc44</i>       | 3.91 | 4.34 | 4.33 | 4.29 |
| ENSMUSG00000001995 | <i>Sipa1l2</i>      | -0.6 | 0.16 | 1.34 | 1.07 |
| ENSMUSG00000001999 | <i>Blvra</i>        | 2.87 | 2.87 | 2.73 | 2.68 |
| ENSMUSG00000002010 | <i>Idh3g</i>        | 5.93 | 6.15 | 6.07 | 5.76 |
| ENSMUSG00000002014 | <i>Ssr4</i>         | 6.39 | 6.86 | 6.51 | 6.6  |
| ENSMUSG00000002015 | <i>Bcap3l</i>       | 7.18 | 7    | 6.89 | 6.69 |
| ENSMUSG00000002017 | <i>2810405J04Ri</i> | 4.24 | 3.66 | 3.76 | 3.37 |
| ENSMUSG00000002028 | <i>Mll1</i>         | 1.35 | 1.32 | 1.55 | 1.2  |
| ENSMUSG00000002031 | <i>1500035H01Ri</i> | 4.61 | 4.74 | 4.9  | 4.99 |
| ENSMUSG00000002032 | <i>Tmem25</i>       | 3.2  | 3.58 | 3.72 | 3.36 |
| ENSMUSG00000002043 | <i>Trappc6a</i>     | 3.32 | 4.3  | 3.84 | 4.01 |
| ENSMUSG00000002052 | <i>Supt6h</i>       | 3.66 | 4.13 | 3.86 | 3.71 |

|                    |                     |      |      |      |      |
|--------------------|---------------------|------|------|------|------|
| ENSMUSG00000002058 | <i>Unc119</i>       | 1.21 | 2.16 | 0.62 | 1.37 |
| ENSMUSG00000002064 | <i>Sdf2</i>         | 4.58 | 5.23 | 5.13 | 5.34 |
| ENSMUSG00000002083 | <i>Bbc3</i>         | 1.5  | 3.28 | 2.57 | 2.31 |
| ENSMUSG00000002102 | <i>Psmc3</i>        | 6.1  | 6.4  | 6.16 | 6.01 |
| ENSMUSG00000002103 | <i>Acp2</i>         | 4.81 | 4.48 | 4.53 | 4.38 |
| ENSMUSG00000002105 | <i>Slc39a13</i>     | 2.37 | 3.08 | 2.45 | 2.3  |
| ENSMUSG00000002107 | <i>Cugbp2</i>       | 1.95 | 1.33 | 2.37 | 1.63 |
| ENSMUSG00000002108 | <i>Nr1h3</i>        | 6.27 | 6.75 | 6.54 | 6.27 |
| ENSMUSG00000002109 | <i>Ddb2</i>         | 3.47 | 2.5  | 2.88 | 2.61 |
| ENSMUSG00000002111 | <i>Sfpi1</i>        | 2.29 | 2.51 | 2.19 | 1.9  |
| ENSMUSG00000002129 | <i>Sf3a1</i>        | 3.47 | 3.83 | 3.65 | 3.65 |
| ENSMUSG00000002147 | <i>Stat6</i>        | 4.33 | 4.46 | 4.43 | 4.38 |
| ENSMUSG00000002205 | <i>Vrk3</i>         | 4.03 | 4.14 | 4.28 | 4.12 |
| ENSMUSG00000002210 | <i>1500002O20Ra</i> | 1.18 | 2.22 | 1.96 | 1.9  |
| ENSMUSG00000002221 | <i>Paxip1</i>       | 2.58 | 2.72 | 2.8  | 2.46 |
| ENSMUSG00000002222 | <i>Rmnd5a</i>       | 5.32 | 4.57 | 5.17 | 4.69 |
| ENSMUSG00000002227 | <i>Mov10</i>        | 2.48 | 2.56 | 2.2  | 2.24 |
| ENSMUSG00000002233 | <i>Rhoc</i>         | 2.32 | 2.87 | 1.82 | 2.87 |
| ENSMUSG00000002249 | <i>Tead3</i>        | 2.03 | 2.88 | 2.72 | 2.51 |
| ENSMUSG00000002250 | <i>Ppard</i>        | 1.72 | 3.54 | 2.01 | 1.72 |
| ENSMUSG00000002274 | <i>Metrn</i>        | 1.55 | 2.37 | 2.24 | 2.24 |
| ENSMUSG00000002279 | <i>Tmem112</i>      | 4.9  | 5.47 | 5.09 | 4.95 |
| ENSMUSG00000002280 | <i>Narfl</i>        | 3.1  | 3.73 | 3.7  | 3.5  |
| ENSMUSG00000002289 | <i>Angptl4</i>      | 7.41 | 6.42 | 7.1  | 7.05 |
| ENSMUSG00000002290 | <i>NA</i>           | 2.04 | 2.15 | 2.27 | 3.39 |
| ENSMUSG00000002307 | <i>Daxx</i>         | 3.19 | 3.5  | 2.83 | 2.97 |
| ENSMUSG00000002308 | <i>Cd320</i>        | 1.84 | 2.29 | 2.21 | 1.96 |
| ENSMUSG00000002319 | <i>Ipo4</i>         | 3.74 | 4.45 | 3.87 | 3.8  |
| ENSMUSG00000002320 | <i>Tm9sfl</i>       | 4.73 | 5.16 | 4.83 | 4.7  |
| ENSMUSG00000002325 | <i>Isgf3g</i>       | 4.75 | 4.32 | 4.06 | 4.45 |
| ENSMUSG00000002326 | <i>Gmpr2</i>        | 3.6  | 3.67 | 3.53 | 3.47 |

|                    |                     |       |      |       |      |
|--------------------|---------------------|-------|------|-------|------|
| ENSMUSG00000002329 | <i>1810034K20Ri</i> | 2.99  | 3.26 | 3.24  | 3.05 |
| ENSMUSG00000002332 | <i>Dhrs1</i>        | 6.4   | 6.91 | 6.28  | 6.32 |
| ENSMUSG00000002342 | <i>Tmem161a</i>     | 2.49  | 3.13 | 2.68  | 2.44 |
| ENSMUSG00000002343 | <i>Armc6</i>        | 1.43  | 2.81 | 1.91  | 1.48 |
| ENSMUSG00000002345 | <i>NA</i>           | 3.57  | 4.4  | 4.29  | 3.89 |
| ENSMUSG00000002346 | <i>Slc25a42</i>     | 4.91  | 5.26 | 5.7   | 5.34 |
| ENSMUSG00000002365 | <i>Snx9</i>         | 4.09  | 3.98 | 4.17  | 3.87 |
| ENSMUSG00000002372 | <i>Ranbp3</i>       | 3.62  | 4.48 | 4     | 3.89 |
| ENSMUSG00000002379 | <i>NA</i>           | 5.22  | 5.83 | 6.31  | 6.25 |
| ENSMUSG00000002393 | <i>Nr2f6</i>        | 4.91  | 6.28 | 5.6   | 5.33 |
| ENSMUSG00000002395 | <i>Use1</i>         | 4.18  | 4.47 | 4.49  | 4.83 |
| ENSMUSG00000002396 | <i>Ocell</i>        | 2.71  | 4.17 | 3.42  | 3.09 |
| ENSMUSG00000002409 | <i>Dyrk1b</i>       | 2.67  | 3.02 | 3.2   | 2.58 |
| ENSMUSG00000002413 | <i>Braf</i>         | 1.85  | 1.05 | 1.5   | 1.18 |
| ENSMUSG00000002416 | <i>Ndufb2</i>       | 5.77  | 5.83 | 6.18  | 5.7  |
| ENSMUSG00000002428 | <i>Hltf</i>         | 1.69  | 0.47 | 1.28  | 0.48 |
| ENSMUSG00000002455 | <i>Prpf6</i>        | 4.23  | 4.46 | 4.3   | 4.03 |
| ENSMUSG00000002475 | <i>Abhd3</i>        | 5.57  | 5.14 | 5.42  | 5.26 |
| ENSMUSG00000002477 | <i>Snrpd1</i>       | 3.79  | 3.37 | 3.39  | 3.28 |
| ENSMUSG00000002496 | <i>Tsc2</i>         | 3.5   | 4.05 | 3.81  | 3.67 |
| ENSMUSG00000002504 | <i>Slc9a3r2</i>     | 3.47  | 4.48 | 3.5   | 3.6  |
| ENSMUSG00000002524 | <i>Puf60</i>        | 5.57  | 5.92 | 5.69  | 5.7  |
| ENSMUSG00000002546 | <i>Golga2</i>       | 3.6   | 3.78 | 3.72  | 3.33 |
| ENSMUSG00000002550 | <i>Uck1</i>         | 3.2   | 2.83 | 3.35  | 2.89 |
| ENSMUSG00000002580 | <i>1810046J19Ri</i> | 6.29  | 5.8  | 6.01  | 5.95 |
| ENSMUSG00000002588 | <i>Pon1</i>         | 10.16 | 9.43 | 10.02 | 9.63 |
| ENSMUSG00000002602 | <i>Axl</i>          | 3.06  | 2.63 | 2.47  | 2.22 |
| ENSMUSG00000002603 | <i>Tgfb1</i>        | 2.41  | 2.85 | 2.75  | 2.21 |
| ENSMUSG00000002608 | <i>Ccdc97</i>       | 3.37  | 4.24 | 3.88  | 3.62 |
| ENSMUSG00000002625 | <i>Akap8l</i>       | 2.94  | 3.44 | 3.39  | 3.07 |
| ENSMUSG00000002635 | <i>Pdcd2l</i>       | 2.8   | 2.96 | 2.6   | 2.59 |

|                    |                     |       |       |       |       |
|--------------------|---------------------|-------|-------|-------|-------|
| ENSMUSG00000002658 | <i>Gtf2fl</i>       | 3.36  | 4.16  | 3.65  | 3.76  |
| ENSMUSG00000002660 | <i>Clpp</i>         | 5.26  | 5.98  | 5.73  | 5.5   |
| ENSMUSG00000002661 | <i>Alkbh7</i>       | 3.72  | 4.25  | 3.84  | 3.46  |
| ENSMUSG00000002679 | <i>Med6</i>         | 3.4   | 2.84  | 3.11  | 2.65  |
| ENSMUSG00000002718 | <i>Csell</i>        | 4.08  | 3.08  | 3.85  | 3.44  |
| ENSMUSG00000002728 | <i>Nat5</i>         | 2.86  | 1.88  | 2.61  | 2.34  |
| ENSMUSG00000002731 | <i>Prkra</i>        | 3.94  | 3.25  | 3.71  | 3.51  |
| ENSMUSG00000002732 | <i>Fkbp7</i>        | 2.11  | 1.81  | 2.2   | 1.94  |
| ENSMUSG00000002733 | <i>Plekha3</i>      | 3.91  | 3.74  | 3.7   | 3.48  |
| ENSMUSG00000002741 | <i>Ykt6</i>         | 5.16  | 5.35  | 4.96  | 4.84  |
| ENSMUSG00000002748 | <i>Baz1b</i>        | 3.64  | 3.5   | 3.66  | 3.63  |
| ENSMUSG00000002763 | <i>Pex6</i>         | 5.04  | 5.93  | 5.31  | 5.36  |
| ENSMUSG00000002767 | <i>Mrpl2</i>        | 4.56  | 5.39  | 4.92  | 4.82  |
| ENSMUSG00000002768 | <i>Meal</i>         | 5.57  | 6.02  | 5.78  | 5.81  |
| ENSMUSG00000002769 | <i>Gnmt</i>         | 10.82 | 11.16 | 11.17 | 10.83 |
| ENSMUSG00000002778 | <i>Erd2.1</i>       | 6.5   | 6.55  | 6.51  | 6.42  |
| ENSMUSG00000002781 | <i>Tmem143</i>      | 3.55  | 3.54  | 3.77  | 3.44  |
| ENSMUSG00000002797 | <i>A030007L17Ri</i> | 3.87  | 3.62  | 2.97  | 2.44  |
| ENSMUSG00000002803 | <i>Btbd6</i>        | 2.94  | 3.66  | 3.51  | 3.22  |
| ENSMUSG00000002804 | <i>Nudt14</i>       | 3.13  | 3.86  | 4.01  | 3.85  |
| ENSMUSG00000002812 | <i>Flii</i>         | 4.06  | 4.4   | 4.37  | 4.18  |
| ENSMUSG00000002814 | <i>Top3a</i>        | 1.17  | 1.07  | 1.13  | 0.83  |
| ENSMUSG00000002820 | <i>Atg4d</i>        | 3.81  | 4.44  | 4.36  | 4.13  |
| ENSMUSG00000002825 | <i>Qtrt1</i>        | 0.7   | 1.65  | 1.3   | 0.6   |
| ENSMUSG00000002831 | <i>S3-12</i>        | 1.8   | 0.07  | 1.4   | 0.79  |
| ENSMUSG00000002833 | <i>Hdgfrp2</i>      | 3.16  | 3.94  | 3.9   | 3.29  |
| ENSMUSG00000002844 | <i>Adprh</i>        | 2.43  | 2.45  | 2.43  | 1.62  |
| ENSMUSG00000002845 | <i>Tmem39a</i>      | 2.94  | 3.2   | 2.69  | 2.94  |
| ENSMUSG00000002846 | <i>4930455C21Ri</i> | 4.61  | 4.37  | 4.51  | 4.27  |
| ENSMUSG00000002847 | <i>Pla1a</i>        | 4.45  | 4.25  | 4.37  | 4.26  |
| ENSMUSG00000002871 | <i>Gpr175</i>       | 3.11  | 3.55  | 3.36  | 2.79  |

|                    |                      |       |       |       |       |
|--------------------|----------------------|-------|-------|-------|-------|
| ENSMUSG00000002881 | <i>Nab1</i>          | 5.27  | 4.74  | 4.86  | 4.46  |
| ENSMUSG00000002885 | <i>Cd97</i>          | 3.32  | 3.66  | 2.88  | 2.8   |
| ENSMUSG00000002897 | <i>Il17ra</i>        | 3.15  | 3.42  | 3.28  | 2.99  |
| ENSMUSG00000002908 | <i>Kcnn1</i>         | 0.88  | 1.62  | 1.83  | 1.1   |
| ENSMUSG00000002910 | <i>Arrdc2</i>        | 3.47  | 4.33  | 4.06  | 3.82  |
| ENSMUSG00000002944 | <i>Cd36</i>          | 5.44  | 2.76  | 5.59  | 3.47  |
| ENSMUSG00000002948 | <i>Map2k7</i>        | 2.99  | 3.63  | 2.98  | 2.87  |
| ENSMUSG00000002949 | <i>Timm44</i>        | 4.65  | 4.97  | 4.86  | 4.64  |
| ENSMUSG00000002957 | <i>mKIAA0899</i>     | 5.06  | 5.05  | 4.77  | 4.66  |
| ENSMUSG00000002963 | <i>Pnkp</i>          | 3.53  | 3.99  | 3.91  | 3.75  |
| ENSMUSG00000002968 | <i>Med25</i>         | 4.16  | 5.37  | 4.81  | 4.41  |
| ENSMUSG00000002980 | <i>Bcam</i>          | 1.47  | 1.84  | 1.64  | 1.75  |
| ENSMUSG00000002981 | <i>Clptm1</i>        | 5.78  | 6.34  | 5.97  | 5.7   |
| ENSMUSG00000002984 | <i>Tomm40</i>        | 4.15  | 5.17  | 4.86  | 4.58  |
| ENSMUSG00000002985 | <i>ApoE</i>          | 12.38 | 13.05 | 13.23 | 13.03 |
| ENSMUSG00000002992 | <i>Apoc2</i>         | 8.72  | 9.03  | 9.51  | 9.56  |
| ENSMUSG00000002996 | <i>Hbpl</i>          | 5.61  | 4.9   | 5.26  | 4.92  |
| ENSMUSG00000003031 | <i>Cdkn1b</i>        | 3.38  | 2.7   | 3.5   | 3.19  |
| ENSMUSG00000003033 | <i>Ap1m1</i>         | 4.39  | 4.86  | 4.77  | 4.65  |
| ENSMUSG00000003037 | <i>Rab8A</i>         | 6.21  | 5.59  | 6.11  | 6.11  |
| ENSMUSG00000003039 | <i>2510049I19Rik</i> | 5.6   | 5.63  | 5.77  | 5.64  |
| ENSMUSG00000003053 | <i>Cyp2c29</i>       | 10.02 | 9.66  | 9.99  | 9.94  |
| ENSMUSG00000003062 | <i>Stard3nl</i>      | 3.07  | 3.09  | 2.68  | 2.3   |
| ENSMUSG00000003068 | <i>lkb1</i>          | 4.77  | 5.61  | 5.23  | 5.01  |
| ENSMUSG00000003072 | <i>Atp5d</i>         | 6.85  | 7.71  | 7.52  | 7.35  |
| ENSMUSG00000003099 | <i>Ppp5c</i>         | 4.73  | 5.46  | 5.07  | 5.05  |
| ENSMUSG00000003119 | <i>Crkrs</i>         | 2.5   | 1.87  | 2.25  | 1.95  |
| ENSMUSG00000003123 | <i>Lipe</i>          | 2.01  | 2.86  | 2.88  | 2.32  |
| ENSMUSG00000003131 | <i>Pafah1b2</i>      | 3.86  | 3.29  | 3.24  | 3.09  |
| ENSMUSG00000003134 | <i>Tbc1d8</i>        | 3.65  | 3.29  | 3.77  | 3.56  |
| ENSMUSG00000003135 | <i>D1Bwg0212e</i>    | 3.35  | 3.07  | 3.08  | 2.57  |

|                    |                    |       |       |      |      |
|--------------------|--------------------|-------|-------|------|------|
| ENSMUSG00000003154 | <i>Foxj2</i>       | 1.73  | 2.24  | 2.13 | 1.88 |
| ENSMUSG00000003161 | <i>Sri</i>         | 4.27  | 4.07  | 3.68 | 3.46 |
| ENSMUSG00000003166 | <i>Dgcr2</i>       | 5.24  | 5.42  | 5.17 | 4.99 |
| ENSMUSG00000003178 | <i>Mical3</i>      | 1.07  | 1.27  | 1.74 | 1.56 |
| ENSMUSG00000003184 | <i>Irf3</i>        | 4.82  | 5.26  | 5.3  | 5.04 |
| ENSMUSG00000003190 | <i>Bcl2l12</i>     | 1.46  | 2.05  | 2.22 | 2.05 |
| ENSMUSG00000003198 | <i>BC011426</i>    | 1.31  | 0.9   | 1.71 | 1.01 |
| ENSMUSG00000003199 | <i>Mpnd</i>        | 5.5   | 6.2   | 5.85 | 5.61 |
| ENSMUSG00000003200 | <i>Sh3gl1</i>      | 3.5   | 4.2   | 3.66 | 3.37 |
| ENSMUSG00000003208 | <i>Ccdc94</i>      | 1.13  | 1.94  | 1.3  | 1.18 |
| ENSMUSG00000003226 | <i>Ranbp2</i>      | 4.2   | 3.45  | 3.78 | 3.29 |
| ENSMUSG00000003233 | <i>Dvl3</i>        | 2.07  | 3.33  | 2.62 | 2.82 |
| ENSMUSG00000003234 | <i>Abcf3</i>       | 4.27  | 4.69  | 4.47 | 4.35 |
| ENSMUSG00000003235 | <i>Eif2b5</i>      | 4.07  | 4.83  | 4.33 | 4.28 |
| ENSMUSG00000003269 | <i>Pscd2</i>       | 2.92  | 2.87  | 2.93 | 2.64 |
| ENSMUSG00000003283 | <i>Hck</i>         | 1.54  | 1.36  | 1.1  | 1.18 |
| ENSMUSG00000003299 | <i>MRPL4</i>       | 3.34  | 4.44  | 4.17 | 4.11 |
| ENSMUSG00000003308 | <i>Keap1</i>       | 4.31  | 5.05  | 4.46 | 4.55 |
| ENSMUSG00000003316 | <i>Glg1</i>        | 3.05  | 3.15  | 3.2  | 2.91 |
| ENSMUSG00000003344 | <i>NA</i>          | 3.93  | 4.71  | 4.2  | 3.93 |
| ENSMUSG00000003345 | <i>Csnk1g2</i>     | 5     | 5.7   | 5.13 | 4.91 |
| ENSMUSG00000003346 | <i>D10Bwgl364e</i> | 4.71  | 5.76  | 5.08 | 5.01 |
| ENSMUSG00000003348 | <i>Mobkl2a</i>     | 1.43  | 2.08  | 1.17 | 0.67 |
| ENSMUSG00000003355 | <i>Fkbp11</i>      | 1.61  | 2.56  | 2.39 | 2.83 |
| ENSMUSG00000003360 | <i>Ddx23</i>       | 3.95  | 4.75  | 4.06 | 3.92 |
| ENSMUSG00000003363 | <i>Pld3</i>        | 3.55  | 4.3   | 4.12 | 3.83 |
| ENSMUSG00000003378 | <i>Grik5</i>       | 1.09  | 1.58  | 0.83 | 1.05 |
| ENSMUSG00000003379 | <i>Cd79a</i>       | -0.39 | -1.18 | 2.24 | -2.3 |
| ENSMUSG00000003380 | <i>Pral</i>        | 5.15  | 6.1   | 5.84 | 5.99 |
| ENSMUSG00000003382 | <i>Etv3</i>        | 1.98  | 1.96  | 1.68 | 1.48 |
| ENSMUSG00000003402 | <i>PrkcsH</i>      | 5.9   | 6.52  | 6.31 | 6.12 |



|                    |                 |      |      |      |      |
|--------------------|-----------------|------|------|------|------|
| ENSMUSG00000003420 | <i>Fcgrt</i>    | 7.1  | 7.33 | 7.14 | 7.07 |
| ENSMUSG00000003421 | <i>Nosip</i>    | 3.27 | 3.65 | 3.56 | 3.42 |
| ENSMUSG00000003423 | <i>Pih1d1</i>   | 4.73 | 5.08 | 4.93 | 4.7  |
| ENSMUSG00000003426 | <i>Rpl13a</i>   | 6.31 | 6.02 | 6.07 | 6.58 |
| ENSMUSG00000003429 | <i>Rps11</i>    | 5.99 | 6.03 | 5.92 | 5.74 |
| ENSMUSG00000003435 | <i>Supt5h</i>   | 4.27 | 5.11 | 4.79 | 4.58 |
| ENSMUSG00000003437 | <i>Paf1</i>     | 3.67 | 4.04 | 3.93 | 3.7  |
| ENSMUSG00000003438 | <i>AK212208</i> | 4.71 | 5.35 | 4.83 | 4.64 |
| ENSMUSG00000003444 | <i>Med29</i>    | 1.62 | 1.24 | 1.2  | 1.81 |
| ENSMUSG00000003458 | <i>Ncstn</i>    | 4.39 | 4.98 | 4.72 | 4.43 |
| ENSMUSG00000003464 | <i>Pex19</i>    | 5.78 | 6.04 | 5.88 | 5.55 |
| ENSMUSG00000003477 | <i>Inmt</i>     | 7.81 | 8.05 | 7.67 | 7.96 |
| ENSMUSG00000003518 | <i>Dusp3</i>    | 4.35 | 3.98 | 4.4  | 4.15 |
| ENSMUSG00000003526 | <i>Prodh</i>    | 6.66 | 7.2  | 7.11 | 6.63 |
| ENSMUSG00000003527 | <i>Es2el</i>    | 1.76 | 2.12 | 2.03 | 1.49 |
| ENSMUSG00000003528 | <i>Slc25a1</i>  | 7.48 | 7.82 | 7.3  | 7.27 |
| ENSMUSG00000003531 | <i>Dgcr6</i>    | 5.01 | 5.68 | 5.49 | 5.2  |
| ENSMUSG00000003546 | <i>Klc4</i>     | 4.82 | 5.11 | 5.51 | 5.03 |
| ENSMUSG00000003549 | <i>Erccl</i>    | 1.84 | 2.74 | 2.84 | 2.99 |
| ENSMUSG00000003555 | <i>Cyp17a1</i>  | 6.78 | 5.11 | 7.33 | 5.8  |
| ENSMUSG00000003559 | <i>As3mt</i>    | 6.06 | 5.15 | 5.74 | 5.24 |
| ENSMUSG00000003573 | <i>Homer3</i>   | 1.24 | 2.07 | 1.2  | 1.12 |
| ENSMUSG00000003575 | <i>Crtcl</i>    | 1    | 1.74 | 1.34 | 1.36 |
| ENSMUSG00000003581 | <i>Rnf215</i>   | 2.38 | 3.22 | 3.04 | 2.69 |
| ENSMUSG00000003585 | <i>Sec14l2</i>  | 8.26 | 8.36 | 8.07 | 7.84 |
| ENSMUSG00000003604 | <i>Aven</i>     | 3.95 | 4.09 | 3.85 | 3.64 |
| ENSMUSG00000003617 | <i>Cp</i>       | 8.44 | 8    | 8.36 | 8.01 |
| ENSMUSG00000003623 | <i>Crot</i>     | 8.47 | 8.25 | 7.43 | 7.27 |
| ENSMUSG00000003644 | <i>Rps6ka1</i>  | 3.32 | 3.88 | 3.6  | 3.53 |
| ENSMUSG00000003660 | <i>Ascc3l1</i>  | 3.87 | 4.11 | 4.07 | 3.86 |
| ENSMUSG00000003662 | <i>Ciaol</i>    | 4.81 | 5.04 | 5.07 | 4.96 |

|                    |                     |      |      |      |      |
|--------------------|---------------------|------|------|------|------|
| ENSMUSG00000003680 | <i>Taf6l</i>        | 0.77 | 1.55 | 1.58 | 1.54 |
| ENSMUSG00000003721 | <i>Insig2</i>       | 8.24 | 7.67 | 7.79 | 6.97 |
| ENSMUSG00000003731 | <i>Kpna6</i>        | 3.55 | 3.43 | 3.34 | 3.29 |
| ENSMUSG00000003746 | <i>Man1a</i>        | 6.56 | 5.84 | 6.27 | 5.82 |
| ENSMUSG00000003752 | <i>Itpkc</i>        | 1.69 | 2.42 | 2.06 | 1.54 |
| ENSMUSG00000003759 | <i>Sb1</i>          | 1.87 | 2.7  | 2.16 | 2.28 |
| ENSMUSG00000003762 | <i>Adek4</i>        | 3.53 | 4.23 | 3.92 | 3.84 |
| ENSMUSG00000003778 | <i>Brd8</i>         | 1.79 | 1.82 | 1.23 | 0.79 |
| ENSMUSG00000003808 | <i>Farsla</i>       | 2.15 | 2.96 | 2.33 | 2.23 |
| ENSMUSG00000003809 | <i>Gcdh</i>         | 8.3  | 8.14 | 8.37 | 7.98 |
| ENSMUSG00000003810 | <i>Mast2</i>        | 2.21 | 2.55 | 2.39 | 2.21 |
| ENSMUSG00000003812 | <i>Dnase2a</i>      | 2.15 | 3.1  | 2.73 | 2.92 |
| ENSMUSG00000003813 | <i>Rad23a</i>       | 4.6  | 5.1  | 5.15 | 4.97 |
| ENSMUSG00000003814 | <i>Calr</i>         | 9.12 | 9.24 | 8.77 | 8.82 |
| ENSMUSG00000003824 | <i>Syce2</i>        | 2.47 | 2.08 | 2.46 | 1.83 |
| ENSMUSG00000003847 | <i>Nfat5</i>        | 2.03 | 1.2  | 1.84 | 1.42 |
| ENSMUSG00000003848 | <i>Nob1</i>         | 2.71 | 2.67 | 2.9  | 2.81 |
| ENSMUSG00000003849 | <i>Nqo1</i>         | 3.95 | 3.16 | 3.39 | 2.87 |
| ENSMUSG00000003868 | <i>Ruvbl2</i>       | 2.4  | 3.77 | 3.03 | 2.83 |
| ENSMUSG00000003873 | <i>Bax</i>          | 3.7  | 4.12 | 3.96 | 3.52 |
| ENSMUSG00000003923 | <i>Tfam</i>         | 4.73 | 4.23 | 4.63 | 4.07 |
| ENSMUSG00000003948 | <i>Paqr11</i>       | 6.79 | 5.97 | 6.15 | 5.83 |
| ENSMUSG00000003949 | <i>Hlf</i>          | 4.28 | 3.47 | 4.2  | 3.72 |
| ENSMUSG00000003955 | <i>2310056P07Ri</i> | 5.9  | 5.91 | 6.05 | 6.04 |
| ENSMUSG00000003970 | <i>Rpl8</i>         | 7.73 | 8.27 | 8.03 | 7.94 |
| ENSMUSG00000004018 | <i>Pog</i>          | 2.29 | 1.69 | 2.06 | 1.57 |
| ENSMUSG00000004032 | <i>Gstm5</i>        | 4.45 | 4.02 | 4.09 | 3.79 |
| ENSMUSG00000004035 | <i>Gstm7</i>        | 6.41 | 6.45 | 6.66 | 6.11 |
| ENSMUSG00000004038 | <i>Gstm3</i>        | 5.87 | 5.43 | 6.41 | 5.62 |
| ENSMUSG00000004040 | <i>Stat3</i>        | 4.76 | 5.17 | 4.98 | 4.77 |
| ENSMUSG00000004043 | <i>Stat5a</i>       | 2.3  | 2.94 | 2.4  | 1.79 |

|                    |                     |      |      |      |      |
|--------------------|---------------------|------|------|------|------|
| ENSMUSG00000004044 | <i>Ptrf</i>         | 1.28 | 1.07 | 0.97 | 0.93 |
| ENSMUSG00000004054 | <i>Map3k11</i>      | 4.12 | 4.91 | 4.33 | 4.45 |
| ENSMUSG00000004056 | <i>Akt2</i>         | 3.45 | 4.09 | 3.73 | 3.31 |
| ENSMUSG00000004069 | <i>Tid1</i>         | 6.43 | 6.18 | 6.35 | 6.12 |
| ENSMUSG00000004070 | <i>Hmox2</i>        | 6.12 | 5.59 | 5.82 | 5.84 |
| ENSMUSG00000004071 | <i>5730403B10Ri</i> | 6.59 | 6.53 | 6.63 | 6.52 |
| ENSMUSG00000004085 | <i>B230120H23R</i>  | 0.95 | 0.54 | 1.68 | 0.76 |
| ENSMUSG00000004096 | <i>Cwc15</i>        | 5.86 | 5.53 | 5.62 | 5.69 |
| ENSMUSG00000004099 | <i>Dnmt1</i>        | 1.01 | 1.4  | 1.42 | 0.9  |
| ENSMUSG00000004100 | <i>Ppan</i>         | 2.21 | 3.34 | 2.3  | 2.33 |
| ENSMUSG00000004105 | <i>Angptl2</i>      | 2.29 | 2.58 | 2.18 | 2.29 |
| ENSMUSG00000004187 | <i>Kifc2</i>        | 0.33 | 0.56 | 1.5  | 1.35 |
| ENSMUSG00000004207 | <i>Psap</i>         | 8.01 | 8.25 | 8    | 7.93 |
| ENSMUSG00000004221 | <i>Ikbkg</i>        | 4.02 | 3.55 | 3.48 | 3.37 |
| ENSMUSG00000004233 | <i>Wars2</i>        | 1.07 | 1.57 | 1.13 | 1.16 |
| ENSMUSG00000004263 | <i>Atn1</i>         | 2.69 | 3.43 | 3.34 | 3.24 |
| ENSMUSG00000004264 | <i>Bcap37</i>       | 7.22 | 7.67 | 7.4  | 7.18 |
| ENSMUSG00000004266 | <i>Ptpn6</i>        | 3.36 | 3.82 | 3.56 | 3.21 |
| ENSMUSG00000004268 | <i>Emg1</i>         | 5.39 | 5.61 | 5.52 | 5.63 |
| ENSMUSG00000004270 | <i>Mboat5</i>       | 6.17 | 5.68 | 6.1  | 5.52 |
| ENSMUSG00000004285 | <i>Atp6v1f</i>      | 4.68 | 4.58 | 4.33 | 4.67 |
| ENSMUSG00000004319 | <i>Clcn3</i>        | 4.02 | 3.56 | 3.85 | 3.32 |
| ENSMUSG00000004356 | <i>NA</i>           | 1.62 | 1.98 | 1.79 | 1.48 |
| ENSMUSG00000004364 | <i>Cul3</i>         | 5.5  | 4.53 | 5.23 | 4.41 |
| ENSMUSG00000004393 | <i>Ddx56</i>        | 3.75 | 4.49 | 4.01 | 3.88 |
| ENSMUSG00000004394 | <i>Tmed4</i>        | 5.71 | 5.3  | 5.3  | 5.35 |
| ENSMUSG00000004446 | <i>Bid</i>          | 1.64 | 1.99 | 2.39 | 1.91 |
| ENSMUSG00000004451 | <i>Ralb</i>         | 2.66 | 2.98 | 2.69 | 2.67 |
| ENSMUSG00000004460 | <i>Dnajb11</i>      | 5.73 | 5.53 | 4.89 | 5.07 |
| ENSMUSG00000004462 | <i>Tbccd1</i>       | 3.74 | 3.87 | 3.78 | 3.61 |
| ENSMUSG00000004530 | <i>Coro1c</i>       | 2.57 | 2.75 | 2.59 | 2.48 |

|                    |                     |      |      |      |      |
|--------------------|---------------------|------|------|------|------|
| ENSMUSG00000004535 | <i>Tax1bp1</i>      | 6.33 | 5.61 | 6.1  | 5.64 |
| ENSMUSG00000004552 | <i>env</i>          | 5.22 | 5.58 | 5.29 | 5.33 |
| ENSMUSG00000004558 | <i>Ndrp2</i>        | 9.36 | 9.54 | 9.49 | 9.52 |
| ENSMUSG00000004561 | <i>Mett11d1</i>     | 3.46 | 3.37 | 3.48 | 3.43 |
| ENSMUSG00000004562 | <i>mFLJ00128</i>    | 1.62 | 2.78 | 2.27 | 1.93 |
| ENSMUSG00000004565 | <i>Pnpla6</i>       | 2.36 | 2.92 | 2.46 | 2.34 |
| ENSMUSG00000004567 | <i>Mcoln1</i>       | 3.61 | 4.1  | 3.74 | 3.61 |
| ENSMUSG00000004568 | <i>Arhgef18</i>     | 2.97 | 3.29 | 2.97 | 2.58 |
| ENSMUSG00000004591 | <i>AK082921</i>     | 4.19 | 3.3  | 3.86 | 3.3  |
| ENSMUSG00000004610 | <i>Etfb</i>         | 8.13 | 8.61 | 8.65 | 8.33 |
| ENSMUSG00000004626 | <i>Stxbp2</i>       | 3.48 | 4.26 | 3.67 | 3.33 |
| ENSMUSG00000004631 | <i>Sgce</i>         | 1.28 | 0.7  | 1.13 | 1.18 |
| ENSMUSG00000004633 | <i>Chn2</i>         | 3.57 | 3.04 | 3.74 | 3.87 |
| ENSMUSG00000004642 | <i>Slbp</i>         | 2.91 | 2    | 2.56 | 2.3  |
| ENSMUSG00000004655 | <i>Aqp1</i>         | 5.95 | 6.43 | 5.71 | 5.73 |
| ENSMUSG00000004665 | <i>Cnn2</i>         | 1.62 | 2.22 | 2.18 | 1.12 |
| ENSMUSG00000004667 | <i>Polr2e</i>       | 2.99 | 3.75 | 3.65 | 3.88 |
| ENSMUSG00000004677 | <i>Myo9b</i>        | 1.93 | 2.51 | 2.47 | 2.17 |
| ENSMUSG00000004730 | <i>Emr1</i>         | 3.38 | 2.51 | 2.19 | 2.12 |
| ENSMUSG00000004748 | <i>I700020C11Ri</i> | 4.31 | 4.54 | 4.44 | 4.38 |
| ENSMUSG00000004768 | <i>Rab23</i>        | 1.8  | 1.72 | 1.64 | 1.15 |
| ENSMUSG00000004771 | <i>Rab11a</i>       | 6    | 5.5  | 5.78 | 5.34 |
| ENSMUSG00000004788 | <i>Eif2b2</i>       | 3.59 | 4.38 | 4.25 | 4.15 |
| ENSMUSG00000004789 | <i>Dlst</i>         | 6.96 | 6.8  | 6.82 | 6.31 |
| ENSMUSG00000004798 | <i>Ulk2</i>         | 4.14 | 3.99 | 4.06 | 3.73 |
| ENSMUSG00000004814 | <i>Ccl24</i>        | 1.52 | 0.94 | 1.26 | 1.14 |
| ENSMUSG00000004815 | <i>Dgkq</i>         | 2.57 | 2.48 | 2.66 | 2.44 |
| ENSMUSG00000004837 | <i>Grap</i>         | 1.33 | 2.21 | 2.02 | 1.54 |
| ENSMUSG00000004843 | <i>Chmp2b</i>       | 4.51 | 3.76 | 4.15 | 3.54 |
| ENSMUSG00000004846 | <i>Plod3</i>        | 3.38 | 4.12 | 3.56 | 3.58 |
| ENSMUSG00000004849 | <i>Apls1</i>        | 4.73 | 4.75 | 4.14 | 4.23 |

|                    |                     |      |      |      |      |
|--------------------|---------------------|------|------|------|------|
| ENSMUSG00000004865 | <i>SRPK1</i>        | 2.61 | 2.91 | 3    | 2.72 |
| ENSMUSG00000004880 | <i>Lbr</i>          | 1.89 | 1.81 | 1.88 | 1.75 |
| ENSMUSG00000004895 | <i>Prcc</i>         | 3.92 | 4.56 | 4.2  | 4.25 |
| ENSMUSG00000004896 | <i>BC023814</i>     | 1.62 | 1.85 | 1.91 | 1.71 |
| ENSMUSG00000004897 | <i>Hdgf</i>         | 6.63 | 6.79 | 6.51 | 6.36 |
| ENSMUSG00000004929 | <i>Thop1</i>        | 2.26 | 3.14 | 2.45 | 2.44 |
| ENSMUSG00000004931 | <i>Apba3</i>        | 4.24 | 5.33 | 4.73 | 4.39 |
| ENSMUSG00000004934 | <i>Pias4</i>        | 2.62 | 3.64 | 3.08 | 3.1  |
| ENSMUSG00000004936 | <i>Map2k1</i>       | 4.84 | 4.65 | 4.42 | 4.38 |
| ENSMUSG00000004937 | <i>Sgta</i>         | 5.04 | 5.91 | 5.43 | 5.37 |
| ENSMUSG00000004945 | <i>5730437N04Ri</i> | 6.14 | 5.63 | 5.77 | 5.27 |
| ENSMUSG00000004947 | <i>Dtx2</i>         | 0.87 | 1.98 | 1.49 | 1.26 |
| ENSMUSG00000004980 | <i>Hnrnpa2b1</i>    | 6.59 | 5.83 | 5.95 | 5.57 |
| ENSMUSG00000004994 | <i>Ccdc130</i>      | 1.11 | 1.92 | 1.39 | 1.63 |
| ENSMUSG00000004996 | <i>2410018C20Ri</i> | 3.06 | 4.22 | 3.42 | 3.25 |
| ENSMUSG00000005034 | <i>Prkacb</i>       | 4.63 | 3.74 | 4.13 | 3.75 |
| ENSMUSG00000005043 | <i>Sgsh</i>         | 1.26 | 2.07 | 1.6  | 1.56 |
| ENSMUSG00000005054 | <i>Cstb</i>         | 5.83 | 5.07 | 5.48 | 5.33 |
| ENSMUSG00000005069 | <i>Pex5</i>         | 5.47 | 5.85 | 5.53 | 5.42 |
| ENSMUSG00000005078 | <i>1200003C05Ri</i> | 3.94 | 3.8  | 4.07 | 3.83 |
| ENSMUSG00000005087 | <i>Cd44</i>         | 1.37 | 0.28 | 0.84 | 0.77 |
| ENSMUSG00000005089 | <i>Slc1a2</i>       | 4.83 | 4.84 | 4.94 | 5.06 |
| ENSMUSG00000005102 | <i>Eif2ak4</i>      | 1.39 | 1.08 | 1.36 | 0.7  |
| ENSMUSG00000005103 | <i>Wdr1</i>         | 4.6  | 4.75 | 4.52 | 4.38 |
| ENSMUSG00000005107 | <i>Slc2a9</i>       | 4.02 | 4.12 | 4.03 | 3.85 |
| ENSMUSG00000005125 | <i>Ndrgl</i>        | 4.59 | 4.95 | 3.76 | 3.01 |
| ENSMUSG00000005142 | <i>Man2b1</i>       | 5.45 | 5.98 | 5.66 | 5.66 |
| ENSMUSG00000005150 | <i>1500041N16Ri</i> | 3.29 | 3.87 | 3.52 | 3.17 |
| ENSMUSG00000005161 | <i>Prdx2</i>        | 4.85 | 4.13 | 4.97 | 5.09 |
| ENSMUSG00000005198 | <i>Polr2a</i>       | 3.25 | 3.31 | 3.53 | 3.33 |
| ENSMUSG00000005204 | <i>Senp3</i>        | 2.96 | 3.27 | 2.94 | 3.26 |

|                    |                 |      |      |      |      |
|--------------------|-----------------|------|------|------|------|
| ENSMUSG00000005225 | <i>Plekha8</i>  | 2.18 | 1.46 | 1.93 | 1.43 |
| ENSMUSG00000005233 | <i>Spbc25</i>   | 1.57 | 0.7  | 1.44 | 0.99 |
| ENSMUSG00000005251 | <i>Ripk4</i>    | 1    | 1.39 | 2    | 1.54 |
| ENSMUSG00000005262 | <i>Ufd11</i>    | 4.5  | 4.27 | 4.34 | 4.2  |
| ENSMUSG00000005268 | <i>Prlr</i>     | 7.44 | 6.12 | 6.54 | 6.09 |
| ENSMUSG00000005269 | <i>Agxt2</i>    | 6.21 | 5.47 | 6.2  | 5.76 |
| ENSMUSG00000005299 | <i>Letm1</i>    | 5.38 | 5.65 | 5.52 | 5.26 |
| ENSMUSG00000005312 | <i>Ubqln1</i>   | 6.68 | 6.1  | 6.15 | 5.99 |
| ENSMUSG00000005320 | <i>Fgfr4</i>    | 4.5  | 5.23 | 4.89 | 4.83 |
| ENSMUSG00000005338 | <i>Cadm3</i>    | 1.38 | 1.86 | 1.55 | 1.38 |
| ENSMUSG00000005354 | <i>Txn2</i>     | 5.86 | 6.57 | 6.19 | 6.11 |
| ENSMUSG00000005362 | <i>Crbn</i>     | 4.65 | 3.73 | 4.3  | 3.78 |
| ENSMUSG00000005370 | <i>Msh6</i>     | 1.87 | 1.41 | 1.37 | 1.16 |
| ENSMUSG00000005371 | <i>Fbxo11</i>   | 3.65 | 2.96 | 3.48 | 2.87 |
| ENSMUSG00000005373 | <i>Mlxipl</i>   | 5.51 | 5.76 | 5.83 | 5.58 |
| ENSMUSG00000005374 | <i>Tbl2</i>     | 3.11 | 3.24 | 2.77 | 2.88 |
| ENSMUSG00000005378 | <i>Wbscr22</i>  | 4.01 | 4.47 | 4.02 | 4.07 |
| ENSMUSG00000005397 | <i>Nid1</i>     | 2.68 | 2.33 | 2.29 | 1.97 |
| ENSMUSG00000005413 | <i>Hmox1</i>    | 3.97 | 5.16 | 4.73 | 4.71 |
| ENSMUSG00000005417 | <i>AA536749</i> | 3.01 | 3.22 | 3.16 | 2.95 |
| ENSMUSG00000005442 | <i>Cic</i>      | 2.09 | 3.14 | 2.65 | 2.57 |
| ENSMUSG00000005469 | <i>Prkaca</i>   | 4.9  | 4.93 | 5.14 | 5.03 |
| ENSMUSG00000005481 | <i>Ddx39</i>    | 2.83 | 3.21 | 2.86 | 2.52 |
| ENSMUSG00000005483 | <i>Dnajb1</i>   | 4.4  | 4.83 | 4.85 | 5.46 |
| ENSMUSG00000005501 | <i>Usp40</i>    | 2.96 | 2.54 | 2.98 | 2.36 |
| ENSMUSG00000005505 | <i>Kbtbd4</i>   | 3.31 | 3.63 | 3.42 | 3.1  |
| ENSMUSG00000005506 | <i>Cugbp1</i>   | 4.73 | 4    | 4.4  | 4.25 |
| ENSMUSG00000005510 | <i>Ndufs3</i>   | 4.32 | 3.95 | 4.47 | 4.3  |
| ENSMUSG00000005514 | <i>Por</i>      | 8.31 | 8.48 | 8.66 | 8.41 |
| ENSMUSG00000005534 | <i>Insr</i>     | 3.41 | 3.22 | 3.9  | 3.82 |
| ENSMUSG00000005547 | <i>Cyp2a5</i>   | 7.96 | 7.31 | 9.06 | 8.65 |

|                    |                |        |        |       |       |
|--------------------|----------------|--------|--------|-------|-------|
| ENSMUSG00000005566 | <i>Trim28</i>  | 4.8    | 5.62   | 5.07  | 5.02  |
| ENSMUSG00000005575 | <i>Ube2m</i>   | 5.22   | 5.85   | 5.46  | 5.39  |
| ENSMUSG00000005580 | <i>Adcy9</i>   | 2.7    | 2.76   | 3.19  | 2.79  |
| ENSMUSG00000005609 | <i>Ctr9</i>    | 3.25   | 3.55   | 3.3   | 3.33  |
| ENSMUSG00000005610 | <i>Eif4g2</i>  | 8.18   | 7.46   | 7.92  | 7.57  |
| ENSMUSG00000005615 | <i>Pcyt1a</i>  | 4.93   | 4.56   | 4.83  | 4.48  |
| ENSMUSG00000005621 | <i>Zfp592</i>  | 3.14   | 3.31   | 3.43  | 3.31  |
| ENSMUSG00000005625 | <i>Psmc4</i>   | 5.53   | 6.39   | 5.95  | 5.7   |
| ENSMUSG00000005629 | <i>Scnm1</i>   | 3.94   | 3.88   | 4.02  | 3.74  |
| ENSMUSG00000005656 | <i>Snx6</i>    | 4.1    | 3.41   | 3.78  | 3.31  |
| ENSMUSG00000005674 | <i>Tomm40l</i> | 5.14   | 4.93   | 5.54  | 5.28  |
| ENSMUSG00000005677 | <i>Nr1i3</i>   | 6.62   | 6.53   | 6.86  | 6.65  |
| ENSMUSG00000005681 | <i>Apoa2</i>   | 13.53  | 12.99  | 13.69 | 14.03 |
| ENSMUSG00000005682 | <i>Usp52</i>   | 2.63   | 2.67   | 2.66  | 2.43  |
| ENSMUSG00000005683 | <i>Cs</i>      | 5.99   | 5.98   | 6.15  | 5.79  |
| ENSMUSG00000005687 | <i>Bcas2</i>   | 4.61   | 4.52   | 4.67  | 4.46  |
| ENSMUSG00000005698 | <i>Ctcf</i>    | 4.17   | 3.86   | 3.82  | 3.56  |
| ENSMUSG00000005699 | <i>Pard6a</i>  | 0.86   | 1.25   | 1.65  | 1.39  |
| ENSMUSG00000005716 | <i>Pvalb</i>   | #NAME? | #NAME? | 1.04  | -0.12 |
| ENSMUSG00000005718 | <i>Tcfap4</i>  | 0.79   | 1.54   | 1.69  | 0.59  |
| ENSMUSG00000005732 | <i>Ranbp1</i>  | 4.12   | 4.26   | 4.47  | 4.36  |
| ENSMUSG00000005774 | <i>Rfx5</i>    | 1.3    | 0.92   | 1.33  | 1.09  |
| ENSMUSG00000005779 | <i>Psmc4</i>   | 6.98   | 7.32   | 7     | 6.76  |
| ENSMUSG00000005802 | <i>Slc30a4</i> | 3.09   | 2.11   | 2.52  | 1.42  |
| ENSMUSG00000005803 | <i>Sqrdl</i>   | 7.13   | 7.01   | 7.03  | 6.51  |
| ENSMUSG00000005804 | <i>Pldn</i>    | 3.36   | 2.49   | 3.2   | 2.36  |
| ENSMUSG00000005813 | <i>Metap1</i>  | 4.32   | 4.13   | 4.3   | 4.2   |
| ENSMUSG00000005823 | <i>Gpr108</i>  | 3.58   | 4.01   | 4.07  | 3.73  |
| ENSMUSG00000005836 | <i>Gata6</i>   | 2.29   | 2.52   | 2.27  | 2.11  |
| ENSMUSG00000005846 | <i>Rsl1d1</i>  | 4.87   | 4.49   | 4.84  | 4.59  |
| ENSMUSG00000005871 | <i>Apc</i>     | 2.98   | 2.1    | 2.77  | 2.45  |

|                    |                     |      |      |      |      |
|--------------------|---------------------|------|------|------|------|
| ENSMUSG00000005873 | <i>Reep5</i>        | 2.39 | 2.34 | 2.13 | 2.26 |
| ENSMUSG00000005881 | <i>Ergic3</i>       | 6.13 | 6.8  | 6.44 | 6.35 |
| ENSMUSG00000005882 | <i>Uqcc</i>         | 3.63 | 3.8  | 3.99 | 3.84 |
| ENSMUSG00000005886 | <i>Ncoa2</i>        | 3.77 | 3.78 | 3.78 | 3.54 |
| ENSMUSG00000005893 | <i>Nr2c2</i>        | 3.01 | 2.07 | 2.59 | 2.29 |
| ENSMUSG00000005897 | <i>Nr2c1</i>        | 2.64 | 1.88 | 2.52 | 1.86 |
| ENSMUSG00000005899 | <i>Smpd4</i>        | 2.08 | 2.26 | 2.31 | 1.81 |
| ENSMUSG00000005907 | <i>Pex1</i>         | 3.08 | 2.76 | 3.3  | 2.88 |
| ENSMUSG00000005936 | <i>Kctd20</i>       | 3.74 | 3.29 | 3.58 | 3.18 |
| ENSMUSG00000005949 | <i>Ctns</i>         | 3.42 | 3.44 | 3.64 | 3.49 |
| ENSMUSG00000005951 | <i>Car1</i>         | 5.16 | 5.09 | 5.48 | 5.14 |
| ENSMUSG00000005973 | <i>Rcn1</i>         | 2.99 | 2.14 | 2.34 | 2.07 |
| ENSMUSG00000005980 | <i>Dnase1</i>       | 1.05 | 0.84 | 1.04 | 0.89 |
| ENSMUSG00000005981 | <i>Trap1</i>        | 6.82 | 6.82 | 6.9  | 6.68 |
| ENSMUSG00000005982 | <i>1200013P24Ri</i> | 6.09 | 5.9  | 6.05 | 5.82 |
| ENSMUSG00000005983 | <i>1700037C18Ri</i> | 3.37 | 3.29 | 3.47 | 3.27 |
| ENSMUSG00000006005 | <i>Tpr</i>          | 3.86 | 3.61 | 3.88 | 3.33 |
| ENSMUSG00000006010 | <i>BC003331</i>     | 4.11 | 3.51 | 3.79 | 3.22 |
| ENSMUSG00000006014 | <i>NA</i>           | 3.75 | 3.55 | 3.68 | 3.5  |
| ENSMUSG00000006019 | <i>Dhx34</i>        | 0.95 | 1.75 | 1.39 | 0.64 |
| ENSMUSG00000006021 | <i>Kptn</i>         | 3.21 | 3.49 | 3.36 | 3.34 |
| ENSMUSG00000006024 | <i>Napa</i>         | 5.66 | 6.39 | 6.04 | 5.94 |
| ENSMUSG00000006050 | <i>Sra1</i>         | 5.9  | 6.31 | 6.3  | 6.11 |
| ENSMUSG00000006057 | <i>Atp5g1</i>       | 1.69 | 2.07 | 2.46 | 2.46 |
| ENSMUSG00000006058 | <i>Snf8</i>         | 3.97 | 4.05 | 4.57 | 4.57 |
| ENSMUSG00000006095 | <i>Tbcb</i>         | 4.2  | 4.24 | 3.97 | 4.09 |
| ENSMUSG00000006127 | <i>Pps</i>          | 2.54 | 3    | 3.03 | 2.63 |
| ENSMUSG00000006134 | <i>Crkl</i>         | 3.97 | 3.62 | 3.81 | 3.83 |
| ENSMUSG00000006169 | <i>Clint1</i>       | 3.84 | 3.63 | 3.37 | 3.21 |
| ENSMUSG00000006191 | <i>Cdkal1</i>       | 2.6  | 2.04 | 2.52 | 2.21 |
| ENSMUSG00000006215 | <i>Zbtb17</i>       | 1.85 | 2.46 | 2.09 | 1.7  |



|                    |                 |      |      |      |      |
|--------------------|-----------------|------|------|------|------|
| ENSMUSG00000006218 | <i>Gm693</i>    | 3.76 | 3.95 | 3.68 | 3.07 |
| ENSMUSG00000006262 | <i>Mobkl1a</i>  | 3.91 | 2.7  | 3.54 | 3    |
| ENSMUSG00000006273 | <i>Atp6v1b2</i> | 5.15 | 4.56 | 4.78 | 4.45 |
| ENSMUSG00000006276 | <i>Eps15l1</i>  | 2.15 | 2.18 | 2.62 | 2.05 |
| ENSMUSG00000006281 | <i>Tep1</i>     | 1.36 | 1.55 | 1.31 | 1.04 |
| ENSMUSG00000006289 | <i>Osgep</i>    | 2.75 | 3.06 | 2.68 | 2.61 |
| ENSMUSG00000006299 | <i>Aamp</i>     | 5.98 | 6.89 | 6.44 | 6.35 |
| ENSMUSG00000006301 | <i>Tmbim1</i>   | 2.51 | 2.98 | 2.54 | 2.53 |
| ENSMUSG00000006304 | <i>Arpc2</i>    | 6.48 | 5.65 | 5.89 | 5.5  |
| ENSMUSG00000006307 | <i>Wbp7</i>     | 1.94 | 2.82 | 2.34 | 2.34 |
| ENSMUSG00000006315 | <i>Tmem147</i>  | 6.25 | 5.76 | 5.79 | 5.42 |
| ENSMUSG00000006333 | <i>Rps9</i>     | 4.86 | 5.14 | 5.09 | 4.84 |
| ENSMUSG00000006335 | <i>Tfpt</i>     | 2.86 | 3.34 | 2.45 | 2.73 |
| ENSMUSG00000006356 | <i>Crip2</i>    | 5.99 | 6.49 | 6.27 | 5.88 |
| ENSMUSG00000006360 | <i>Crip1</i>    | 3.26 | 2.37 | 3.53 | 4.4  |
| ENSMUSG00000006373 | <i>Pgrmc1</i>   | 9.5  | 9.18 | 9.37 | 8.9  |
| ENSMUSG00000006378 | <i>Gcat</i>     | 6.63 | 6.79 | 6.7  | 6.29 |
| ENSMUSG00000006386 | <i>Tek</i>      | 2.7  | 2.52 | 2.2  | 2.28 |
| ENSMUSG00000006390 | <i>Elovl1</i>   | 4.73 | 4.85 | 4.9  | 4.48 |
| ENSMUSG00000006392 | <i>Med8</i>     | 4.98 | 5.01 | 4.94 | 4.58 |
| ENSMUSG00000006395 | <i>Hyi</i>      | 5.38 | 5.02 | 5.6  | 4.63 |
| ENSMUSG00000006412 | <i>Pfdn2</i>    | 5.53 | 5.73 | 5.67 | 5.72 |
| ENSMUSG00000006418 | <i>Zfp313</i>   | 4.79 | 5.11 | 4.88 | 4.77 |
| ENSMUSG00000006423 | <i>NA</i>       | 3.17 | 2.24 | 2.8  | 2.14 |
| ENSMUSG00000006442 | <i>Srm</i>      | 3.56 | 4.84 | 3.97 | 4.13 |
| ENSMUSG00000006445 | <i>Epha2</i>    | 2.03 | 3.39 | 2.13 | 1.27 |
| ENSMUSG00000006456 | <i>Rbm14</i>    | 3.11 | 3.8  | 3.58 | 3.47 |
| ENSMUSG00000006463 | <i>Zdhhc24</i>  | 0.86 | 0.77 | 1.19 | 0.89 |
| ENSMUSG00000006471 | <i>Ndor1</i>    | 2    | 2.49 | 2.07 | 2.33 |
| ENSMUSG00000006476 | <i>Nelf</i>     | 5.14 | 5.25 | 4.96 | 4.81 |
| ENSMUSG00000006494 | <i>Pdk1</i>     | 5.75 | 4.64 | 5.32 | 4.44 |

|                    |                 |       |       |      |       |
|--------------------|-----------------|-------|-------|------|-------|
| ENSMUSG00000006498 | <i>Ptbp1</i>    | 5.14  | 5.22  | 5.08 | 5.05  |
| ENSMUSG00000006517 | <i>Mvd</i>      | 2.23  | 2.51  | 1.93 | 1.92  |
| ENSMUSG00000006519 | <i>Cyba</i>     | 3.09  | 3.42  | 3.59 | 2.99  |
| ENSMUSG00000006522 | <i>Itih3</i>    | 8.56  | 9.1   | 8.64 | 8.58  |
| ENSMUSG00000006526 | <i>Tmem110</i>  | 2.31  | 3.23  | 2.94 | 2.61  |
| ENSMUSG00000006527 | <i>Sfmbt1</i>   | 2.7   | 2.22  | 2.41 | 2.04  |
| ENSMUSG00000006529 | <i>Itih1</i>    | 8.1   | 8.62  | 8.06 | 8.25  |
| ENSMUSG00000006567 | <i>Atp7b</i>    | 2.58  | 2.89  | 2.92 | 2.62  |
| ENSMUSG00000006574 | <i>Slc4a1</i>   | -4.15 | -2.21 | 1.34 | -1.25 |
| ENSMUSG00000006575 | <i>Rundc3a</i>  | 1.88  | 2.41  | 2.57 | 1.83  |
| ENSMUSG00000006585 | <i>Cdt1</i>     | 0.45  | 0.62  | 2.18 | 1.12  |
| ENSMUSG00000006589 | <i>Aprt</i>     | 4.76  | 5.21  | 5.48 | 5.27  |
| ENSMUSG00000006599 | <i>p62</i>      | 4.6   | 3.61  | 4.04 | 3.78  |
| ENSMUSG00000006611 | <i>Hfe</i>      | 5.15  | 4.79  | 4.82 | 4.38  |
| ENSMUSG00000006638 | <i>Abhd1</i>    | 5.63  | 5.78  | 5.87 | 5.66  |
| ENSMUSG00000006641 | <i>Slc5a6</i>   | 0.67  | 0.77  | 1.96 | 1.37  |
| ENSMUSG00000006673 | <i>Qrich1</i>   | 4.29  | 4.27  | 4.33 | 4.2   |
| ENSMUSG00000006676 | <i>Usp19</i>    | 4.02  | 4.75  | 4.48 | 4.31  |
| ENSMUSG00000006699 | <i>Cdc42</i>    | 7.02  | 5.97  | 6.25 | 5.71  |
| ENSMUSG00000006705 | <i>Pknox1</i>   | 2.16  | 2.42  | 1.99 | 2.35  |
| ENSMUSG00000006715 | <i>Gmnn</i>     | 1.49  | 1.95  | 2.56 | 2.05  |
| ENSMUSG00000006717 | <i>Them2</i>    | 6.02  | 6.08  | 6.09 | 6.01  |
| ENSMUSG00000006728 | <i>Cdk4</i>     | 4.47  | 5.1   | 4.88 | 4.7   |
| ENSMUSG00000006731 | <i>B4galnt1</i> | 6.03  | 6.83  | 6.45 | 6.43  |
| ENSMUSG00000006732 | <i>Mettl1</i>   | 2.96  | 4.04  | 2.75 | 3.08  |
| ENSMUSG00000006736 | <i>Tspan31</i>  | 7.89  | 7.88  | 7.95 | 7.62  |
| ENSMUSG00000006740 | <i>Kif5b</i>    | 4.17  | 3.34  | 3.66 | 3.45  |
| ENSMUSG00000006763 | <i>NA</i>       | 2.29  | 2.31  | 2.39 | 2.37  |
| ENSMUSG00000006777 | <i>Krt23</i>    | 2.91  | 1.71  | 3.89 | 2.4   |
| ENSMUSG00000006782 | <i>Cnp</i>      | 3.5   | 4.12  | 3.56 | 3.06  |
| ENSMUSG00000006800 | <i>Sulf2</i>    | 3.29  | 2.9   | 3.95 | 3.33  |

|                    |                     |      |       |      |      |
|--------------------|---------------------|------|-------|------|------|
| ENSMUSG00000006818 | <i>Sod2</i>         | 7.61 | 7.26  | 7.53 | 7.39 |
| ENSMUSG00000006850 | <i>Tmco6</i>        | 1.64 | 2.03  | 1.92 | 1.66 |
| ENSMUSG00000006906 | <i>Stambp</i>       | 3.46 | 2.93  | 3.41 | 2.89 |
| ENSMUSG00000006920 | <i>Ezh1</i>         | 2.39 | 2.47  | 2.46 | 1.95 |
| ENSMUSG00000006932 | <i>Ctnnb1</i>       | 6.33 | 6.4   | 6.23 | 6.11 |
| ENSMUSG00000006941 | <i>Eif1b</i>        | 4.47 | 4.02  | 4.34 | 4.3  |
| ENSMUSG00000006998 | <i>Psmc2</i>        | 5.16 | 5.42  | 4.95 | 4.91 |
| ENSMUSG00000007029 | <i>Vars</i>         | 3.44 | 4.25  | 3.77 | 3.56 |
| ENSMUSG00000007036 | <i>Bat5</i>         | 4.11 | 4.67  | 4.39 | 4.13 |
| ENSMUSG00000007038 | <i>Neu1</i>         | 4.47 | 4.7   | 4.96 | 4.65 |
| ENSMUSG00000007041 | <i>Clic1</i>        | 3.99 | 4.29  | 3.93 | 3.75 |
| ENSMUSG00000007050 | <i>Lsm2</i>         | 3.33 | 4.21  | 4.41 | 4.09 |
| ENSMUSG00000007338 | <i>Mrpl49</i>       | 4.47 | 4.75  | 5.12 | 5.03 |
| ENSMUSG00000007411 | <i>Mark3</i>        | 4.3  | 4.13  | 4.09 | 3.9  |
| ENSMUSG00000007415 | <i>Gatad1</i>       | 5.06 | 4.56  | 4.7  | 4.39 |
| ENSMUSG00000007458 | <i>M6pr</i>         | 5.09 | 4.99  | 4.8  | 4.34 |
| ENSMUSG00000007476 | <i>Lrrc8a</i>       | 3.67 | 4.15  | 3.86 | 3.82 |
| ENSMUSG00000007564 | <i>Ppp2r1a</i>      | 4.97 | 5.75  | 5.32 | 5.31 |
| ENSMUSG00000007570 | <i>NA</i>           | 1.86 | 2.7   | 2.12 | 2.21 |
| ENSMUSG00000007589 | <i>Tinf2</i>        | 2.41 | 2.36  | 2.09 | 2.26 |
| ENSMUSG00000007594 | <i>Hapln4</i>       | 2.88 | 2.55  | 2.31 | 2.76 |
| ENSMUSG00000007603 | <i>Dus3l</i>        | 2.37 | 2.76  | 2.59 | 2.52 |
| ENSMUSG00000007610 | <i>Gtpbp3</i>       | 1.45 | 2.26  | 1.69 | 1.24 |
| ENSMUSG00000007613 | <i>Tgfbr1</i>       | 3.41 | 2.44  | 2.96 | 2.39 |
| ENSMUSG00000007617 | <i>Homer1</i>       | 1.32 | -0.04 | 0.83 | 0.62 |
| ENSMUSG00000007656 | <i>AK076052</i>     | 4.46 | 3.24  | 3.96 | 3.75 |
| ENSMUSG00000007659 | <i>Bcl2l1</i>       | 4.99 | 5.24  | 4.57 | 4.73 |
| ENSMUSG00000007670 | <i>Khsrp</i>        | 3.51 | 3.82  | 4.15 | 3.86 |
| ENSMUSG00000007721 | <i>Ccdc124</i>      | 4.61 | 5.19  | 4.55 | 4.57 |
| ENSMUSG00000007739 | <i>Cct4</i>         | 6.34 | 5.71  | 6.05 | 5.61 |
| ENSMUSG00000007777 | <i>0610009B22Ri</i> | 4.56 | 3.94  | 4.51 | 3.94 |

|                    |                     |        |        |      |       |
|--------------------|---------------------|--------|--------|------|-------|
| ENSMUSG00000007812 | <i>Zfp655</i>       | 4.08   | 2.79   | 3.52 | 2.92  |
| ENSMUSG00000007815 | <i>Rhoa</i>         | 5.92   | 5.6    | 5.53 | 5.26  |
| ENSMUSG00000007817 | <i>Zmiz1</i>        | 2.94   | 3.56   | 3.14 | 2.67  |
| ENSMUSG00000007833 | <i>Aldh16a1</i>     | 4.35   | 4.78   | 4.76 | 4.45  |
| ENSMUSG00000007836 | <i>NA</i>           | 3.78   | 5.23   | 4.48 | 4.24  |
| ENSMUSG00000007837 | <i>Prrg2</i>        | 3.95   | 4.58   | 4.28 | 4.39  |
| ENSMUSG00000007850 | <i>Hnrph1</i>       | 4.64   | 4.03   | 4.46 | 4.06  |
| ENSMUSG00000007867 | <i>1700019E19Ri</i> | 0.74   | 0.77   | 1.84 | 1.2   |
| ENSMUSG00000007872 | <i>Id3</i>          | 4.65   | 6.23   | 4.59 | 4.47  |
| ENSMUSG00000007877 | <i>Tcap</i>         | #NAME? | #NAME? | 2.47 | 2.28  |
| ENSMUSG00000007880 | <i>Arid1a</i>       | 3.26   | 3.59   | 3.55 | 3.45  |
| ENSMUSG00000007891 | <i>Ctsd</i>         | 7.56   | 7.99   | 7.88 | 7.64  |
| ENSMUSG00000007892 | <i>Rplp1</i>        | 3.97   | 4.64   | 4.59 | 4.97  |
| ENSMUSG00000007950 | <i>Abhd8</i>        | 0.7    | 2.05   | 1.17 | 1.49  |
| ENSMUSG00000007987 | <i>Rab15</i>        | 1.75   | 2.09   | 2.49 | 1.88  |
| ENSMUSG00000008035 | <i>Midlip1</i>      | 4.09   | 4.69   | 4.36 | 4.65  |
| ENSMUSG00000008036 | <i>Ap2s1</i>        | 5.77   | 6.46   | 5.94 | 5.89  |
| ENSMUSG00000008090 | <i>Fgfr11</i>       | 3.6    | 3.86   | 4.26 | 4.16  |
| ENSMUSG00000008140 | <i>2310044H10Ri</i> | 5.27   | 5.95   | 5.8  | 5.57  |
| ENSMUSG00000008167 | <i>Fbxw9</i>        | 2.92   | 3.67   | 3.3  | 3.18  |
| ENSMUSG00000008193 | <i>Spib</i>         | -2.66  | -3.24  | 1.03 | -2.83 |
| ENSMUSG00000008200 | <i>Fnbp4</i>        | 2.17   | 2.02   | 1.9  | 2.17  |
| ENSMUSG00000008206 | <i>Lass4</i>        | 0.66   | 1.67   | 1.28 | 1.22  |
| ENSMUSG00000008226 | <i>Scrn3</i>        | 4.16   | 3.92   | 3.99 | 3.88  |
| ENSMUSG00000008301 | <i>Rnuxa</i>        | 4.71   | 4.29   | 4.43 | 4.2   |
| ENSMUSG00000008305 | <i>Tle1</i>         | 4.34   | 4.18   | 4.14 | 4.07  |
| ENSMUSG00000008333 | <i>Snrpb2</i>       | 3.78   | 2.92   | 3.44 | 3.05  |
| ENSMUSG00000008348 | <i>NA</i>           | 3.3    | 3.54   | 3.91 | 3.71  |
| ENSMUSG00000008373 | <i>Prpf31</i>       | 1.33   | 2.13   | 1.67 | 1.77  |
| ENSMUSG00000008384 | <i>Sertad1</i>      | 1.28   | 2.34   | 2.45 | 2.16  |
| ENSMUSG00000008393 | <i>Carhsp1</i>      | 3.34   | 3.54   | 3.09 | 3.41  |

|                    |                 |       |       |       |       |
|--------------------|-----------------|-------|-------|-------|-------|
| ENSMUSG00000008398 | <i>Elk3</i>     | 2.09  | 2.33  | 1.85  | 1.68  |
| ENSMUSG00000008429 | <i>Herpud2</i>  | 4.46  | 4.51  | 4.56  | 4.22  |
| ENSMUSG00000008435 | <i>Rdh13</i>    | 1.69  | 1.92  | 1.81  | 1.95  |
| ENSMUSG00000008475 | <i>Arpc5</i>    | 5.83  | 4.84  | 5.64  | 5.69  |
| ENSMUSG00000008540 | <i>Mgst1</i>    | 10.13 | 9.61  | 10.13 | 9.69  |
| ENSMUSG00000008575 | <i>Nfib</i>     | 4.18  | 3.74  | 4.08  | 3.87  |
| ENSMUSG00000008604 | <i>Ubqln4</i>   | 4.42  | 5.07  | 4.41  | 4.67  |
| ENSMUSG00000008668 | <i>Rps18</i>    | 3.94  | 3.96  | 4.14  | 3.86  |
| ENSMUSG00000008682 | <i>Rpl10</i>    | 2.76  | 2.03  | 2.49  | 2.53  |
| ENSMUSG00000008683 | <i>Rps15a</i>   | 2.72  | 1.41  | 1.91  | 2.87  |
| ENSMUSG00000008686 | <i>NA</i>       | 1.4   | -0.19 | 0.24  | -0.21 |
| ENSMUSG00000008690 | <i>Ncaph2</i>   | 5.13  | 5.55  | 5.2   | 5.09  |
| ENSMUSG00000008730 | <i>Hipk1</i>    | 4.72  | 4.25  | 4.55  | 4.15  |
| ENSMUSG00000008763 | <i>Man1a2</i>   | 3.87  | 2.92  | 3.35  | 2.81  |
| ENSMUSG00000008822 | <i>Acypl</i>    | 2.29  | 0.95  | 2.37  | 1.65  |
| ENSMUSG00000008845 | <i>Cd163</i>    | 2.98  | 1.54  | 2.55  | 1.41  |
| ENSMUSG00000008855 | <i>HDAC5</i>    | 3.19  | 4.15  | 3.68  | 3.29  |
| ENSMUSG00000008859 | <i>Rala</i>     | 4.18  | 3.77  | 3.81  | 3.62  |
| ENSMUSG00000008892 | <i>Vdac3</i>    | 2.03  | 2.58  | 2.61  | 2.21  |
| ENSMUSG00000008958 | <i>Vps72</i>    | 2.87  | 3.89  | 3.47  | 3.22  |
| ENSMUSG00000008976 | <i>Gabpa</i>    | 4.3   | 3.55  | 4.21  | 3.9   |
| ENSMUSG00000009013 | <i>Dynll1</i>   | 2.91  | 3.27  | 2.77  | 2.55  |
| ENSMUSG00000009030 | <i>Pdcl</i>     | 3.51  | 2.91  | 3.1   | 2.78  |
| ENSMUSG00000009035 | <i>Tmem184b</i> | 3.68  | 3.83  | 4.08  | 3.63  |
| ENSMUSG00000009073 | <i>Nf2</i>      | 3.25  | 3.4   | 3.38  | 3.23  |
| ENSMUSG00000009076 | <i>Zmat5</i>    | 2.5   | 3.53  | 3.13  | 3.24  |
| ENSMUSG00000009079 | <i>Ewsr1</i>    | 2.21  | 2.43  | 2.38  | 2.12  |
| ENSMUSG00000009090 | <i>Ap1b1</i>    | 4.65  | 5.33  | 4.93  | 4.8   |
| ENSMUSG00000009112 | <i>Bcl2l13</i>  | 3.89  | 3.75  | 3.9   | 3.64  |
| ENSMUSG00000009145 | <i>Dqx1</i>     | 2.05  | 2.17  | 2.71  | 2.33  |
| ENSMUSG00000009281 | <i>Rarres2</i>  | 9.41  | 9.05  | 9.57  | 9.57  |

|                    |                     |      |      |      |      |
|--------------------|---------------------|------|------|------|------|
| ENSMUSG00000009291 | <i>Pttglip</i>      | 7.97 | 7.8  | 7.74 | 7.41 |
| ENSMUSG00000009293 | <i>Ube2g2</i>       | 5.24 | 5.98 | 4.91 | 5.07 |
| ENSMUSG00000009376 | <i>Met</i>          | 4.22 | 3.79 | 4.3  | 3.78 |
| ENSMUSG00000009378 | <i>Slc16a12</i>     | 5.05 | 4.65 | 4.48 | 4.32 |
| ENSMUSG00000009406 | <i>Elk1</i>         | 1.76 | 1.41 | 1.29 | 1.4  |
| ENSMUSG00000009470 | <i>Tnpo1</i>        | 3.95 | 3.04 | 3.8  | 3.27 |
| ENSMUSG00000009535 | <i>Rnmt</i>         | 3.05 | 2.34 | 2.24 | 1.81 |
| ENSMUSG00000009549 | <i>Srp14</i>        | 4.96 | 4.26 | 4.57 | 4.42 |
| ENSMUSG00000009555 | <i>Cdk9</i>         | 3.97 | 4.68 | 3.76 | 3.44 |
| ENSMUSG00000009563 | <i>Tor2a</i>        | 4.4  | 5.08 | 4.62 | 4.49 |
| ENSMUSG00000009566 | <i>Fpgs</i>         | 6.72 | 7.29 | 6.61 | 6.33 |
| ENSMUSG00000009569 | <i>Mkl2</i>         | 1.7  | 2.12 | 1.94 | 1.66 |
| ENSMUSG00000009575 | <i>Cbx5</i>         | 2.88 | 2.05 | 2.29 | 1.89 |
| ENSMUSG00000009585 | <i>Apobec3</i>      | 0.51 | 0.06 | 1.38 | 0.49 |
| ENSMUSG00000009614 | <i>Sardh</i>        | 8.26 | 8.5  | 8.37 | 7.97 |
| ENSMUSG00000009621 | <i>Vav2</i>         | 2.87 | 3.7  | 3.53 | 3.47 |
| ENSMUSG00000009630 | <i>Ppp2cb</i>       | 4.75 | 4.77 | 4.56 | 4.56 |
| ENSMUSG00000009633 | <i>G0s2</i>         | 5.91 | 6.17 | 5.21 | 5.12 |
| ENSMUSG00000009640 | <i>Dmap1</i>        | 2.83 | 3.46 | 3.17 | 2.96 |
| ENSMUSG00000009646 | <i>Pla2g12b</i>     | 5.87 | 6.22 | 5.82 | 5.75 |
| ENSMUSG00000009647 | <i>Ccdc109a</i>     | 2.97 | 2.81 | 2.95 | 2.61 |
| ENSMUSG00000009654 | <i>Oit3</i>         | 4.63 | 4.88 | 4.12 | 4.28 |
| ENSMUSG00000009681 | <i>Bcr</i>          | 3.37 | 3.8  | 3.71 | 3.47 |
| ENSMUSG00000009687 | <i>Fxyd5</i>        | 2.5  | 2.15 | 2.56 | 2.75 |
| ENSMUSG00000009733 | <i>Tcfcp2</i>       | 1.61 | 1.49 | 1.55 | 1.18 |
| ENSMUSG00000009741 | <i>NA</i>           | 4.63 | 4.31 | 4.65 | 4.51 |
| ENSMUSG00000009772 | <i>Nuak2</i>        | 2.29 | 2.89 | 1.93 | 1.58 |
| ENSMUSG00000009828 | <i>Ick</i>          | 2.57 | 2.38 | 1.98 | 1.47 |
| ENSMUSG00000009863 | <i>Sdhb</i>         | 8.01 | 7.94 | 8.24 | 7.74 |
| ENSMUSG00000009894 | <i>1110031B06Ri</i> | 4.96 | 5.2  | 4.98 | 5.08 |
| ENSMUSG00000009905 | <i>Fvt1</i>         | 3.79 | 3.24 | 3.79 | 3.52 |

|                    |                     |      |       |      |      |
|--------------------|---------------------|------|-------|------|------|
| ENSMUSG00000009907 | <i>Vps4b</i>        | 3.6  | 2.73  | 3.32 | 2.82 |
| ENSMUSG00000009927 | <i>Rps25</i>        | 1.41 | 0.29  | 0.83 | 0.91 |
| ENSMUSG00000009995 | <i>Taz</i>          | 4.17 | 3.9   | 4.1  | 3.92 |
| ENSMUSG00000010025 | <i>Aldh3a2</i>      | 7.87 | 7.03  | 7.35 | 6.93 |
| ENSMUSG00000010045 | <i>Tmem115</i>      | 3.88 | 4.67  | 4.2  | 4.23 |
| ENSMUSG00000010047 | <i>Hyal2</i>        | 5.11 | 5.41  | 5.03 | 4.66 |
| ENSMUSG00000010048 | <i>Ifrd2</i>        | 4.29 | 4.71  | 4.73 | 4.37 |
| ENSMUSG00000010051 | <i>Hyal1</i>        | 4.02 | 4.27  | 4.2  | 4.01 |
| ENSMUSG00000010054 | <i>Tusc2</i>        | 4.31 | 4.63  | 4.24 | 4.15 |
| ENSMUSG00000010057 | <i>Tusc4</i>        | 3.23 | 3.83  | 3.47 | 3.28 |
| ENSMUSG00000010064 | <i>Slc38a3</i>      | 9.46 | 10.03 | 9.85 | 9.72 |
| ENSMUSG00000010067 | <i>Rassf1</i>       | 1.55 | 1.86  | 1.6  | 1.54 |
| ENSMUSG00000010095 | <i>Slc3a2</i>       | 5.77 | 5.84  | 5.68 | 5.59 |
| ENSMUSG00000010097 | <i>Nxf1</i>         | 4.13 | 4.28  | 4.31 | 4.22 |
| ENSMUSG00000010110 | <i>Stx5</i>         | 5.3  | 5.65  | 4.98 | 4.6  |
| ENSMUSG00000010122 | <i>RP23-451A6.3</i> | 6.31 | 6.17  | 6.32 | 5.82 |
| ENSMUSG00000010175 | <i>Prox1</i>        | 4.32 | 4.69  | 4.52 | 4.53 |
| ENSMUSG00000010205 | <i>Raver1</i>       | 3.48 | 3.99  | 3.83 | 3.48 |
| ENSMUSG00000010277 | <i>2610507B11Ri</i> | 5.53 | 5.5   | 5.17 | 4.88 |
| ENSMUSG00000010290 | <i>AI597479</i>     | 2.59 | 2.04  | 2.47 | 1.81 |
| ENSMUSG00000010307 | <i>Tmem86a</i>      | 2.31 | 2.78  | 2.36 | 2.5  |
| ENSMUSG00000010358 | <i>Ifi35</i>        | 4.47 | 4.71  | 4.43 | 4.38 |
| ENSMUSG00000010362 | <i>Rdm1</i>         | 2.39 | 3.34  | 2.99 | 3.23 |
| ENSMUSG00000010376 | <i>Nedd8</i>        | 6.38 | 6.44  | 6.58 | 6.41 |
| ENSMUSG00000010392 | <i>Gosr1</i>        | 4.33 | 3.93  | 4.2  | 4    |
| ENSMUSG00000010406 | <i>Mrpl52</i>       | 6.2  | 5.87  | 6.38 | 6.32 |
| ENSMUSG00000010453 | <i>4632411B12Ri</i> | 3.73 | 3.9   | 4.02 | 3.87 |
| ENSMUSG00000010492 | <i>Uck11</i>        | 3.07 | 3.1   | 3.16 | 2.89 |
| ENSMUSG00000010517 | <i>Faf1</i>         | 4.62 | 4.12  | 4.3  | 3.96 |
| ENSMUSG00000010538 | <i>1700021C14Ri</i> | 2.89 | 2.27  | 2.67 | 2.99 |
| ENSMUSG00000010554 | <i>Mett10d</i>      | 3    | 2.71  | 2.8  | 2.4  |

|                    |                     |      |      |      |      |
|--------------------|---------------------|------|------|------|------|
| ENSMUSG00000010601 | <i>Apol3</i>        | 5.23 | 5.05 | 5.03 | 5    |
| ENSMUSG00000010607 | <i>Pigyl</i>        | 4.26 | 4.56 | 5.58 | 6.25 |
| ENSMUSG00000010608 | <i>NA</i>           | 4.74 | 3.84 | 4.3  | 3.89 |
| ENSMUSG00000010609 | <i>Psen2</i>        | 6.29 | 6.72 | 6.44 | 6.05 |
| ENSMUSG00000010651 | <i>Acaalb</i>       | 8.03 | 8.27 | 7.79 | 7.82 |
| ENSMUSG00000010663 | <i>Fads1</i>        | 8.49 | 8.01 | 7.81 | 7.64 |
| ENSMUSG00000010755 | <i>Cars</i>         | 3.53 | 4.12 | 3.32 | 3.12 |
| ENSMUSG00000010797 | <i>Wnt2</i>         | 2.02 | 1.58 | 1.04 | 1.45 |
| ENSMUSG00000010911 | <i>Apip</i>         | 3.79 | 3.54 | 4.12 | 3.69 |
| ENSMUSG00000010914 | <i>Pdhx</i>         | 3.3  | 3.22 | 3.6  | 3.24 |
| ENSMUSG00000010936 | <i>Vac14</i>        | 3.03 | 3.85 | 3.68 | 3.5  |
| ENSMUSG00000011096 | <i>Akt1s1</i>       | 4.01 | 4.77 | 4.33 | 4.13 |
| ENSMUSG00000011114 | <i>Tbrg1</i>        | 5.25 | 5.31 | 5.12 | 5.1  |
| ENSMUSG00000011148 | <i>Adssl1</i>       | 3.85 | 4.23 | 4.08 | 3.47 |
| ENSMUSG00000011158 | <i>Brfl</i>         | 2.14 | 2.82 | 2.64 | 2.32 |
| ENSMUSG00000011179 | <i>Odc1</i>         | 3.23 | 2.48 | 2.61 | 2.28 |
| ENSMUSG00000011257 | <i>Pabpc4</i>       | 1.63 | 1.49 | 2.05 | 1.64 |
| ENSMUSG00000011263 | <i>NA</i>           | 1.91 | 2.81 | 1.47 | 1.82 |
| ENSMUSG00000011305 | <i>2310076L09Ri</i> | 6.86 | 6.31 | 5.93 | 5.14 |
| ENSMUSG00000011306 | <i>Sf4</i>          | 2.92 | 3.26 | 2.83 | 2.65 |
| ENSMUSG00000011382 | <i>Dhdh</i>         | 6.64 | 6.1  | 6.78 | 6.38 |
| ENSMUSG00000011427 | <i>Zfp790</i>       | 1.8  | 1.6  | 1.84 | 1.74 |
| ENSMUSG00000011658 | <i>Fuz</i>          | 2.64 | 3.35 | 2.7  | 2.67 |
| ENSMUSG00000011752 | <i>Pgam1</i>        | 0.87 | 0.78 | 1.41 | 1.06 |
| ENSMUSG00000011831 | <i>Evi5</i>         | 5.35 | 4.72 | 5.04 | 4.53 |
| ENSMUSG00000011832 | <i>B130050I23Ri</i> | 1.05 | 1.48 | 0.88 | 0.83 |
| ENSMUSG00000011837 | <i>Snape2</i>       | 3.05 | 3.36 | 3.27 | 2.88 |
| ENSMUSG00000011877 | <i>Git1</i>         | 2.36 | 3.18 | 2.77 | 2.45 |
| ENSMUSG00000011884 | <i>Gltp</i>         | 1.62 | 1.81 | 1.68 | 1.68 |
| ENSMUSG00000011958 | <i>Bnip2</i>        | 4.51 | 3.75 | 4.26 | 3.89 |
| ENSMUSG00000011960 | <i>Ccnt1</i>        | 2.64 | 2.55 | 2.81 | 2.8  |



|                    |                     |      |       |      |       |
|--------------------|---------------------|------|-------|------|-------|
| ENSMUSG00000012076 | <i>Brms11</i>       | 0.95 | -0.16 | 1.19 | 0.4   |
| ENSMUSG00000012114 | <i>Med15</i>        | 3.48 | 3.9   | 3.64 | 3.54  |
| ENSMUSG00000012117 | <i>Dhdds</i>        | 4.28 | 4.29  | 3.89 | 3.96  |
| ENSMUSG00000012296 | <i>Tjap1</i>        | 1.28 | 2.46  | 1.89 | 1.79  |
| ENSMUSG00000012405 | <i>Rpl15</i>        | 2.18 | 1.16  | 1.29 | 1.07  |
| ENSMUSG00000012422 | <i>Tmem167</i>      | 4.5  | 3.51  | 3.74 | 3.27  |
| ENSMUSG00000012428 | <i>Steap4</i>       | 6.39 | 6.58  | 5.78 | 5.77  |
| ENSMUSG00000012429 | <i>2810021B07Ri</i> | 1.87 | 0.74  | 1.89 | 1.25  |
| ENSMUSG00000012483 | <i>Rpa3</i>         | 2.39 | 1.18  | 2.45 | 0.99  |
| ENSMUSG00000012519 | <i>Mlkl</i>         | 1.92 | 1.12  | 0.75 | 0.53  |
| ENSMUSG00000012535 | <i>Tnpo3</i>        | 4.9  | 4.5   | 4.47 | 4.19  |
| ENSMUSG00000012640 | <i>Zfp715</i>       | 2.3  | 1.31  | 1.61 | 1.04  |
| ENSMUSG00000012848 | <i>Rps5</i>         | 7.74 | 8.19  | 7.85 | 8.28  |
| ENSMUSG00000013076 | <i>Amotl1</i>       | 1.9  | 2.18  | 1.41 | 1.43  |
| ENSMUSG00000013150 | <i>Gfod2</i>        | 2.54 | 2.9   | 2.15 | 1.84  |
| ENSMUSG00000013160 | <i>Atp6v0d1</i>     | 6.21 | 5.87  | 6.02 | 5.9   |
| ENSMUSG00000013465 | <i>Nelfb</i>        | 3.56 | 4.48  | 3.84 | 3.64  |
| ENSMUSG00000013495 | <i>Tmem175</i>      | 2.48 | 2.53  | 2.52 | 1.99  |
| ENSMUSG00000013539 | <i>D16H22S680E</i>  | 5.74 | 5.76  | 6.2  | 5.82  |
| ENSMUSG00000013593 | <i>Ndufs2</i>       | 7.24 | 7.46  | 7.42 | 7.1   |
| ENSMUSG00000013622 | <i>0610007C21Ri</i> | 5.9  | 6.03  | 5.94 | 5.79  |
| ENSMUSG00000013646 | <i>Sh3bp5l</i>      | 2.79 | 3.51  | 3.08 | 2.97  |
| ENSMUSG00000013662 | <i>Atad1</i>        | 5.43 | 4.55  | 5.2  | 4.46  |
| ENSMUSG00000013663 | <i>Pten</i>         | 5.89 | 5.1   | 5.53 | 5.07  |
| ENSMUSG00000013698 | <i>Pea15a</i>       | 3.48 | 3.53  | 2.95 | 3.2   |
| ENSMUSG00000013707 | <i>Tnfaip8l2</i>    | 0.16 | 0.61  | 1.13 | -0.43 |
| ENSMUSG00000013736 | <i>Trnt1</i>        | 3.51 | 2.31  | 2.94 | 2.49  |
| ENSMUSG00000013787 | <i>Ehmt2</i>        | 3.86 | 4.66  | 4.29 | 4.11  |
| ENSMUSG00000013822 | <i>Elofl</i>        | 5.02 | 5.71  | 5.62 | 5.49  |
| ENSMUSG00000013833 | <i>Med16</i>        | 3.27 | 4.3   | 3.39 | 3.05  |
| ENSMUSG00000013846 | <i>St3gal1</i>      | 5.26 | 5.51  | 4.81 | 4.99  |

|                    |                  |      |      |      |      |
|--------------------|------------------|------|------|------|------|
| ENSMUSG00000013858 | <i>mFLJ00277</i> | 5.26 | 6.31 | 5.77 | 5.6  |
| ENSMUSG00000013973 | <i>Dedd</i>      | 4.16 | 4.23 | 4.21 | 4.04 |
| ENSMUSG00000013997 | <i>Nit1</i>      | 5.09 | 5.11 | 5.13 | 5.01 |
| ENSMUSG00000014074 | <i>Rnf168</i>    | 3.11 | 2.53 | 2.5  | 2.19 |
| ENSMUSG00000014077 | <i>Sid470</i>    | 5.93 | 7.03 | 5.5  | 6.59 |
| ENSMUSG00000014164 | <i>NA</i>        | 0.54 | 1.12 | 1.12 | 1.34 |
| ENSMUSG00000014177 | <i>Fam18b</i>    | 4.53 | 3.9  | 4.16 | 3.79 |
| ENSMUSG00000014195 | <i>mDj11</i>     | 4.84 | 4.99 | 4.94 | 4.81 |
| ENSMUSG00000014226 | <i>Cacybp</i>    | 5.35 | 4.8  | 4.79 | 4.55 |
| ENSMUSG00000014232 | <i>Cluap1</i>    | 1.96 | 2.21 | 2.29 | 2.23 |
| ENSMUSG00000014243 | <i>NA</i>        | 2.73 | 3.21 | 3.09 | 3.22 |
| ENSMUSG00000014245 | <i>Pigl</i>      | 2.12 | 2.45 | 2.49 | 2.15 |
| ENSMUSG00000014294 | <i>Ndufa2</i>    | 6.73 | 6.7  | 7.18 | 6.98 |
| ENSMUSG00000014313 | <i>Cox6c</i>     | 6.34 | 5.2  | 5.97 | 5.34 |
| ENSMUSG00000014349 | <i>Ube2z</i>     | 4.96 | 5.17 | 4.81 | 4.7  |
| ENSMUSG00000014353 | <i>Tmem87b</i>   | 3.8  | 2.73 | 3.39 | 2.61 |
| ENSMUSG00000014355 | <i>Anapc1</i>    | 2.94 | 2.67 | 2.94 | 2.29 |
| ENSMUSG00000014361 | <i>Mertk</i>     | 3.3  | 3.2  | 3.33 | 3.11 |
| ENSMUSG00000014372 | <i>Cyp2d10</i>   | 8.25 | 8.75 | 8.59 | 8.59 |
| ENSMUSG00000014402 | <i>Tsg101</i>    | 4.08 | 3.25 | 3.66 | 2.92 |
| ENSMUSG00000014418 | <i>Hps5</i>      | 2.32 | 2.05 | 2.26 | 1.64 |
| ENSMUSG00000014426 | <i>Map3k4</i>    | 2.23 | 2.74 | 2.66 | 2.34 |
| ENSMUSG00000014470 | <i>Rnf166</i>    | 2.31 | 3.1  | 2.96 | 2.84 |
| ENSMUSG00000014496 | <i>Ankrd28</i>   | 3.59 | 2.84 | 3.42 | 2.81 |
| ENSMUSG00000014498 | <i>Ankrd52</i>   | 2.75 | 3.31 | 3.07 | 3.17 |
| ENSMUSG00000014503 | <i>Pkd2l2</i>    | 2.58 | 1.91 | 2.23 | 1.53 |
| ENSMUSG00000014504 | <i>Srp19</i>     | 3.99 | 4.32 | 3.84 | 3.76 |
| ENSMUSG00000014542 | <i>Clec4f</i>    | 6.05 | 5.97 | 5.67 | 5.69 |
| ENSMUSG00000014547 | <i>Wdfy2</i>     | 1.71 | 2.15 | 2.09 | 1.66 |
| ENSMUSG00000014550 | <i>Zfyve20</i>   | 2.39 | 2.44 | 2.1  | 2.01 |
| ENSMUSG00000014551 | <i>Mrps25</i>    | 3.81 | 3.66 | 3.88 | 3.26 |

|                    |                     |      |      |      |      |
|--------------------|---------------------|------|------|------|------|
| ENSMUSG00000014554 | <i>Dguok</i>        | 3.39 | 3.28 | 3.59 | 3.49 |
| ENSMUSG00000014599 | <i>Csfl</i>         | 1.13 | 1.38 | 1.34 | 1.24 |
| ENSMUSG00000014601 | <i>6330569M22R</i>  | 2.83 | 3.18 | 2.69 | 2.69 |
| ENSMUSG00000014606 | <i>Slc25a11</i>     | 5.97 | 6.03 | 6.04 | 5.68 |
| ENSMUSG00000014633 | <i>2310061C15Ri</i> | 4.26 | 3.77 | 3.89 | 3.85 |
| ENSMUSG00000014668 | <i>Chfr</i>         | 3.41 | 2.96 | 3.09 | 2.85 |
| ENSMUSG00000014748 | <i>Tex261</i>       | 5.44 | 5.44 | 5.46 | 5.07 |
| ENSMUSG00000014763 | <i>4932442K08Ri</i> | 2.71 | 2.6  | 2.59 | 2.42 |
| ENSMUSG00000014767 | <i>Tbp</i>          | 2.9  | 2.33 | 2.48 | 2.66 |
| ENSMUSG00000014769 | <i>Psmbl</i>        | 7.21 | 7.12 | 7.14 | 7.07 |
| ENSMUSG00000014771 | <i>Pdcd2</i>        | 4.16 | 3.83 | 3.93 | 3.45 |
| ENSMUSG00000014773 | <i>Dll1</i>         | 0.86 | 1.85 | 1.16 | 1.01 |
| ENSMUSG00000014791 | <i>Elmo3</i>        | 2.92 | 3.76 | 3.07 | 3.15 |
| ENSMUSG00000014850 | <i>Msh3</i>         | 2.16 | 1.47 | 2.12 | 1.57 |
| ENSMUSG00000014852 | <i>Adamts13</i>     | 1.2  | 2.09 | 0.72 | 1.17 |
| ENSMUSG00000014856 | <i>Hspc171</i>      | 4.84 | 4.96 | 5.13 | 4.92 |
| ENSMUSG00000014859 | <i>E2f4</i>         | 3.72 | 4.62 | 4.07 | 4.01 |
| ENSMUSG00000014867 | <i>Surf4</i>        | 7.27 | 7.58 | 7.12 | 7.04 |
| ENSMUSG00000014873 | <i>Surf2</i>        | 3.65 | 3.45 | 3.69 | 3.48 |
| ENSMUSG00000014905 | <i>Dnajb9</i>       | 5.37 | 4.96 | 5.11 | 5.15 |
| ENSMUSG00000014932 | <i>Yes1</i>         | 3.61 | 2.3  | 3.19 | 2.43 |
| ENSMUSG00000014956 | <i>Ppp1cb</i>       | 6.18 | 5.25 | 5.74 | 5.18 |
| ENSMUSG00000014959 | <i>Gorasp2</i>      | 5.7  | 6.18 | 5.74 | 5.76 |
| ENSMUSG00000014980 | <i>5730449L18Ri</i> | 0.74 | 1.83 | 1.02 | 0.72 |
| ENSMUSG00000015002 | <i>KIAA0143</i>     | 4.35 | 3.88 | 4.19 | 3.79 |
| ENSMUSG00000015013 | <i>Trappc2l</i>     | 3.64 | 3.77 | 3.95 | 4.38 |
| ENSMUSG00000015016 | <i>BC021611</i>     | 4.18 | 4.84 | 4.64 | 4.34 |
| ENSMUSG00000015023 | <i>Ddx19a</i>       | 3.39 | 3.3  | 3.58 | 3.11 |
| ENSMUSG00000015027 | <i>Galns</i>        | 1.3  | 1.67 | 1.69 | 1.28 |
| ENSMUSG00000015083 | <i>C8g</i>          | 8.38 | 8.5  | 8.62 | 8.37 |
| ENSMUSG00000015085 | <i>Entpd2</i>       | 1.31 | 1.66 | 0.8  | 1.25 |

|                    |                     |      |      |      |      |
|--------------------|---------------------|------|------|------|------|
| ENSMUSG00000015087 | <i>B230208H17R</i>  | 2.99 | 3.51 | 3.04 | 2.9  |
| ENSMUSG00000015090 | <i>Ptgds</i>        | 3.09 | 1.77 | 3.39 | 2.07 |
| ENSMUSG00000015092 | <i>Edf1</i>         | 6.29 | 6.14 | 6.48 | 6.36 |
| ENSMUSG00000015094 | <i>Npdc1</i>        | 1.37 | 2.23 | 2.07 | 1.42 |
| ENSMUSG00000015095 | <i>Fbxw5</i>        | 4.11 | 4.58 | 4.47 | 4.18 |
| ENSMUSG00000015112 | <i>Slc25a13</i>     | 7.29 | 6.45 | 6.99 | 6.51 |
| ENSMUSG00000015120 | <i>Ube2i</i>        | 1.45 | 1.68 | 1.37 | 1.38 |
| ENSMUSG00000015126 | <i>0610007P22Ri</i> | 2.12 | 3.06 | 2.88 | 2.84 |
| ENSMUSG00000015133 | <i>Lrrk1</i>        | 1.32 | 1.65 | 1.6  | 1.69 |
| ENSMUSG00000015143 | <i>Actn1</i>        | 3.01 | 3.45 | 3.25 | 3.39 |
| ENSMUSG00000015149 | <i>Sirt2</i>        | 5.18 | 5.6  | 5.2  | 5.08 |
| ENSMUSG00000015165 | <i>Hnrnp1</i>       | 4.95 | 5.18 | 5.19 | 5.05 |
| ENSMUSG00000015176 | <i>Nolc1</i>        | 3.58 | 4.16 | 3.43 | 3.65 |
| ENSMUSG00000015189 | <i>Casdl</i>        | 4.07 | 3.71 | 3.91 | 3.28 |
| ENSMUSG00000015202 | <i>Cnksr3</i>       | 1.57 | 2.49 | 2.02 | 1.73 |
| ENSMUSG00000015214 | <i>Mtmr1</i>        | 3.68 | 3.18 | 3.49 | 3.05 |
| ENSMUSG00000015224 | <i>Cyp2j9</i>       | 1.14 | 0.92 | 0.24 | 0.51 |
| ENSMUSG00000015243 | <i>Abcal</i>        | 4.46 | 4.28 | 4.49 | 4.16 |
| ENSMUSG00000015247 | <i>Nipsnap3a</i>    | 6.14 | 5.68 | 5.66 | 5.4  |
| ENSMUSG00000015289 | <i>Lage3</i>        | 2.37 | 1.73 | 2.14 | 1.83 |
| ENSMUSG00000015290 | <i>Ubl4</i>         | 4.68 | 4.87 | 4.93 | 5.05 |
| ENSMUSG00000015291 | <i>Gdi1</i>         | 4.74 | 4.95 | 4.85 | 4.57 |
| ENSMUSG00000015305 | <i>Sash1</i>        | 3.5  | 3.3  | 3.34 | 3.1  |
| ENSMUSG00000015312 | <i>Gadd45b</i>      | 2.91 | 2.9  | 2.89 | 2.8  |
| ENSMUSG00000015335 | <i>Zdhhc12</i>      | 3.56 | 3.97 | 4.07 | 4.03 |
| ENSMUSG00000015337 | <i>Endog</i>        | 4.41 | 5.28 | 4.84 | 4.72 |
| ENSMUSG00000015340 | <i>AK153180</i>     | 2.98 | 1.77 | 2.58 | 2.12 |
| ENSMUSG00000015341 | <i>Golga7</i>       | 4.27 | 3.96 | 4.28 | 3.8  |
| ENSMUSG00000015342 | <i>Xk</i>           | 1.86 | 1.07 | 1    | 0.28 |
| ENSMUSG00000015357 | <i>Clpx</i>         | 7.51 | 6.85 | 6.25 | 5.6  |
| ENSMUSG00000015363 | <i>Trabd</i>        | 4.96 | 5.99 | 4.98 | 5.03 |

|                    |                     |      |      |      |      |
|--------------------|---------------------|------|------|------|------|
| ENSMUSG00000015377 | <i>I700027J05Ri</i> | 1.34 | 1.52 | 1.37 | 1.45 |
| ENSMUSG00000015461 | <i>Crebl1</i>       | 3.45 | 4.33 | 3.61 | 4.07 |
| ENSMUSG00000015474 | <i>Ppt2</i>         | 4.69 | 5.07 | 4.93 | 4.84 |
| ENSMUSG00000015478 | <i>Rnf5</i>         | 5.47 | 5.98 | 5.47 | 5.59 |
| ENSMUSG00000015488 | <i>5930434B04Ri</i> | 2.91 | 3.82 | 3.08 | 3.23 |
| ENSMUSG00000015522 | <i>Arnt</i>         | 3.41 | 3.13 | 3.22 | 2.96 |
| ENSMUSG00000015536 | <i>Mocs2</i>        | 6.78 | 6.47 | 6.7  | 6.31 |
| ENSMUSG00000015542 | <i>Nat9</i>         | 3.75 | 4.14 | 4.25 | 4.01 |
| ENSMUSG00000015568 | <i>Lpl</i>          | 3.21 | 3.02 | 2.94 | 2.83 |
| ENSMUSG00000015575 | <i>Atp6v0e</i>      | 5.34 | 5.61 | 5.68 | 5.45 |
| ENSMUSG00000015597 | <i>Zfp318</i>       | 2.65 | 2.18 | 2.57 | 2.18 |
| ENSMUSG00000015605 | <i>Srf</i>          | 2.7  | 3.56 | 3.08 | 2.92 |
| ENSMUSG00000015653 | <i>Steap2</i>       | 1.57 | 1.58 | 1.38 | 1.44 |
| ENSMUSG00000015656 | <i>Hspa8</i>        | 4.12 | 4.56 | 4.48 | 4.46 |
| ENSMUSG00000015659 | <i>Serac1</i>       | 1.12 | 0.78 | 1.28 | 0.89 |
| ENSMUSG00000015668 | <i>Pdzd11</i>       | 4.35 | 4.06 | 4.18 | 4.29 |
| ENSMUSG00000015671 | <i>Psma2</i>        | 5.06 | 5.11 | 4.92 | 4.68 |
| ENSMUSG00000015672 | <i>Mrpl32</i>       | 5.21 | 3.64 | 4.64 | 4.25 |
| ENSMUSG00000015697 | <i>Setdb1</i>       | 2.89 | 2.87 | 2.86 | 2.67 |
| ENSMUSG00000015711 | <i>Prune</i>        | 2.53 | 2.38 | 2.55 | 2.32 |
| ENSMUSG00000015714 | <i>Lass2</i>        | 7.9  | 7.4  | 7.57 | 7.15 |
| ENSMUSG00000015733 | <i>Capza2</i>       | 6.35 | 5.14 | 5.87 | 5.26 |
| ENSMUSG00000015745 | <i>Plekh01</i>      | 2.12 | 2.74 | 2.19 | 2.12 |
| ENSMUSG00000015747 | <i>Vps45</i>        | 2.7  | 2.35 | 2.41 | 1.93 |
| ENSMUSG00000015748 | <i>Prpf3</i>        | 2.38 | 2.05 | 2.13 | 2.14 |
| ENSMUSG00000015749 | <i>Anp32e</i>       | 3.72 | 3.71 | 3.07 | 3.02 |
| ENSMUSG00000015750 | <i>Aph1a</i>        | 3.95 | 2.89 | 3.75 | 2.83 |
| ENSMUSG00000015755 | <i>Map3k7ip2</i>    | 5.84 | 5.43 | 5.06 | 4.84 |
| ENSMUSG00000015757 | <i>Ppil4</i>        | 3.61 | 2.73 | 3.01 | 2.51 |
| ENSMUSG00000015759 | <i>Cnih</i>         | 6.22 | 5.29 | 5.66 | 5.21 |
| ENSMUSG00000015776 | <i>Med22</i>        | 3.5  | 4.24 | 3.82 | 3.75 |

|                    |                 |      |       |       |       |
|--------------------|-----------------|------|-------|-------|-------|
| ENSMUSG00000015790 | <i>Surf1</i>    | 4.98 | 5.35  | 5.13  | 5.03  |
| ENSMUSG00000015804 | <i>Med28</i>    | 3.94 | 3.96  | 3.9   | 3.64  |
| ENSMUSG00000015806 | <i>Qdpr</i>     | 8.13 | 8.16  | 8.13  | 7.72  |
| ENSMUSG00000015837 | <i>Sqstm1</i>   | 7.53 | 8.1   | 7.56  | 7.53  |
| ENSMUSG00000015839 | <i>Nfe2l2</i>   | 4.91 | 4.68  | 5.02  | 4.78  |
| ENSMUSG00000015843 | <i>Rxrg</i>     | 1.32 | 1.77  | 2.13  | 1.63  |
| ENSMUSG00000015846 | <i>Rxra</i>     | 7.18 | 7.61  | 7.13  | 7.18  |
| ENSMUSG00000015854 | <i>Cd5l</i>     | 5.79 | 5.35  | 4.86  | 5.29  |
| ENSMUSG00000015869 | <i>NA</i>       | 4.95 | 5.33  | 5.35  | 5.05  |
| ENSMUSG00000015882 | <i>Lcorl</i>    | 1.04 | -0.07 | -0.04 | -0.37 |
| ENSMUSG00000015889 | <i>Lta4h</i>    | 3.96 | 3.73  | 3.91  | 3.93  |
| ENSMUSG00000015890 | <i>NA</i>       | 7.16 | 7.18  | 6.94  | 6.69  |
| ENSMUSG00000015932 | <i>Dstn</i>     | 6.97 | 6.58  | 6.41  | 6.13  |
| ENSMUSG00000015937 | <i>H2afy</i>    | 5.4  | 5.5   | 5.34  | 5.21  |
| ENSMUSG00000015942 | <i>Gtf2ird2</i> | 1.83 | 1.9   | 1.4   | 1.68  |
| ENSMUSG00000015943 | <i>Bola1</i>    | 3.53 | 4.18  | 4.11  | 4.06  |
| ENSMUSG00000015950 | <i>Ncf1</i>     | 1.7  | 1.52  | 1.33  | 0.83  |
| ENSMUSG00000015961 | <i>Adss</i>     | 4.77 | 4     | 4.59  | 3.91  |
| ENSMUSG00000015966 | <i>Il17rb</i>   | 2.06 | 2.08  | 2.27  | 2.03  |
| ENSMUSG00000015968 | <i>cacna1d</i>  | 1.93 | 1.2   | 2.04  | 1.65  |
| ENSMUSG00000015970 | <i>Chdh</i>     | 5.81 | 5.65  | 5.9   | 5.51  |
| ENSMUSG00000015971 | <i>Actr8</i>    | 3.98 | 4.02  | 3.87  | 3.93  |
| ENSMUSG00000015994 | <i>Fnta</i>     | 4.9  | 4.66  | 4.6   | 4.31  |
| ENSMUSG00000016018 | <i>Skiv2l2</i>  | 3.44 | 3.05  | 3.36  | 3.14  |
| ENSMUSG00000016024 | <i>Lbp</i>      | 6.33 | 6.63  | 6.54  | 6.31  |
| ENSMUSG00000016028 | <i>Celsr1</i>   | 2.96 | 2.48  | 2.39  | 2.1   |
| ENSMUSG00000016128 | <i>Stard13</i>  | 3.03 | 2.87  | 2.78  | 2.02  |
| ENSMUSG00000016181 | <i>AA408296</i> | 1.35 | 1.66  | 1.44  | 1.65  |
| ENSMUSG00000016194 | <i>Hsd11b1</i>  | 9.03 | 9.16  | 9.17  | 8.94  |
| ENSMUSG00000016239 | <i>Lonrf3</i>   | 1.17 | 1.53  | 0.64  | -0.07 |
| ENSMUSG00000016252 | <i>Atp5e</i>    | 6.9  | 6.99  | 7.04  | 7.01  |

|                    |                     |       |      |      |      |
|--------------------|---------------------|-------|------|------|------|
| ENSMUSG00000016253 | <i>Th11</i>         | 3.78  | 3.93 | 4.17 | 4.04 |
| ENSMUSG00000016256 | <i>Ctsz</i>         | 7.38  | 8.07 | 7.84 | 7.65 |
| ENSMUSG00000016257 | <i>Slmo2</i>        | 4.34  | 4.55 | 4.82 | 4.49 |
| ENSMUSG00000016308 | <i>Ube2a</i>        | 4.57  | 4.44 | 4.31 | 4.17 |
| ENSMUSG00000016319 | <i>Slc25a5</i>      | 6.86  | 6.4  | 6.86 | 6.18 |
| ENSMUSG00000016344 | <i>2700038C09Ri</i> | 4.74  | 4.96 | 4.71 | 4.72 |
| ENSMUSG00000016382 | <i>Pls3</i>         | 5.47  | 5.16 | 4.98 | 4.65 |
| ENSMUSG00000016409 | <i>Nkap</i>         | 2.41  | 1.68 | 1.99 | 1.68 |
| ENSMUSG00000016427 | <i>Ndufa1</i>       | 7.12  | 6.8  | 7.45 | 7.52 |
| ENSMUSG00000016477 | <i>E2f3</i>         | 1.55  | 1.11 | 1.1  | 0.82 |
| ENSMUSG00000016481 | <i>Crry</i>         | 4     | 3.36 | 3.5  | 3.47 |
| ENSMUSG00000016487 | <i>Ppfibp1</i>      | 3.51  | 3.21 | 3.44 | 3.17 |
| ENSMUSG00000016495 | <i>5033414D02Ri</i> | 1.9   | 0.5  | 1.37 | 0.64 |
| ENSMUSG00000016503 | <i>Gtf3a</i>        | 3.94  | 4.07 | 4.01 | 3.88 |
| ENSMUSG00000016510 | <i>Mtif3</i>        | 3.12  | 3.14 | 3.11 | 2.96 |
| ENSMUSG00000016520 | <i>Ln timer</i>     | 2.79  | 3.26 | 2.59 | 2.21 |
| ENSMUSG00000016528 | <i>Mapkapk2</i>     | 5.31  | 5.15 | 5.27 | 5.18 |
| ENSMUSG00000016534 | <i>Lamp2</i>        | 8.87  | 7.88 | 8.44 | 7.94 |
| ENSMUSG00000016541 | <i>Atxn10</i>       | 5.68  | 5.03 | 5.25 | 5.18 |
| ENSMUSG00000016554 | <i>Eif3d</i>        | 5.61  | 6.06 | 5.85 | 5.65 |
| ENSMUSG00000016559 | <i>H3f3b</i>        | 5.27  | 4.64 | 5.2  | 4.56 |
| ENSMUSG00000016619 | <i>Nup50</i>        | 3.95  | 3.69 | 3.74 | 3.6  |
| ENSMUSG00000016637 | <i>Rab14</i>        | 2.58  | 3.24 | 2.86 | 3.76 |
| ENSMUSG00000016664 | <i>Pacsin2</i>      | 4.43  | 4.81 | 4.57 | 4.46 |
| ENSMUSG00000016756 | <i>Cmah</i>         | 4.49  | 3.97 | 4.26 | 3.87 |
| ENSMUSG00000016757 | <i>Till12</i>       | 2.68  | 3.52 | 2.91 | 2.73 |
| ENSMUSG00000016758 | <i>Bik</i>          | -0.28 | 2.63 | 1.74 | 2.5  |
| ENSMUSG00000016831 | <i>mKIAA0737</i>    | 3.27  | 3.2  | 3.13 | 2.85 |
| ENSMUSG00000016833 | <i>Mrps18c</i>      | 4.44  | 2.78 | 3.87 | 3.67 |
| ENSMUSG00000016921 | <i>Sfrs6</i>        | 5.56  | 5.36 | 5.08 | 4.85 |
| ENSMUSG00000016933 | <i>Plcg1</i>        | 3.25  | 3.26 | 3.59 | 3.39 |

|                    |                |        |        |       |       |
|--------------------|----------------|--------|--------|-------|-------|
| ENSMUSG00000016940 | <i>Kctd2</i>   | 2.95   | 3.45   | 3.24  | 3.02  |
| ENSMUSG00000016942 | <i>Tmprss6</i> | 7.85   | 8.45   | 7.96  | 7.79  |
| ENSMUSG00000016946 | <i>Kctd5</i>   | 1.18   | 1.74   | 1.16  | 0.95  |
| ENSMUSG00000016984 | <i>Etaal1</i>  | 1.9    | 0.96   | 1.35  | 0.7   |
| ENSMUSG00000017009 | <i>Sdc4</i>    | 8.14   | 8.74   | 8.13  | 8.23  |
| ENSMUSG00000017057 | <i>Il13ral</i> | 4.71   | 4.12   | 3.87  | 3.57  |
| ENSMUSG00000017119 | <i>Nbr1</i>    | 6.31   | 5.97   | 6.16  | 5.9   |
| ENSMUSG00000017132 | <i>CLM1-A</i>  | 3.65   | 3.73   | 4.24  | 4.14  |
| ENSMUSG00000017144 | <i>Rnd3</i>    | 3.23   | 2.84   | 2.46  | 2.59  |
| ENSMUSG00000017176 | <i>Nt5c3l</i>  | 1.08   | 1.3    | 0.86  | 0.55  |
| ENSMUSG00000017188 | <i>Ccdc56</i>  | 5.71   | 5.84   | 5.49  | 5.39  |
| ENSMUSG00000017210 | <i>Thrap4</i>  | 2.63   | 3.23   | 2.63  | 2.61  |
| ENSMUSG00000017221 | <i>Psmc3</i>   | 6.13   | 6.59   | 5.9   | 5.88  |
| ENSMUSG00000017264 | <i>Exosc10</i> | 3.54   | 3.72   | 3.68  | 3.52  |
| ENSMUSG00000017286 | <i>Glod4</i>   | 5.58   | 4.95   | 5.33  | 4.81  |
| ENSMUSG00000017288 | <i>Vps53</i>   | 4.18   | 4.01   | 4.05  | 3.71  |
| ENSMUSG00000017291 | <i>Taok1</i>   | 3.45   | 2.19   | 2.98  | 2.3   |
| ENSMUSG00000017299 | <i>mTdf1</i>   | 2.55   | 3.29   | 3.57  | 3.01  |
| ENSMUSG00000017300 | <i>Tnnc2</i>   | #NAME? | #NAME? | 2.63  | 2.85  |
| ENSMUSG00000017307 | <i>Acot8</i>   | 3.7    | 3.93   | 3.79  | 3.51  |
| ENSMUSG00000017309 | <i>Cd300lg</i> | 3.88   | 3.98   | 3.54  | 3.43  |
| ENSMUSG00000017344 | <i>Vtn</i>     | 10.44  | 10.87  | 10.55 | 10.62 |
| ENSMUSG00000017376 | <i>Nlk</i>     | 2.04   | 1.62   | 2.31  | 1.82  |
| ENSMUSG00000017386 | <i>Traf4</i>   | 4.09   | 5.08   | 4.61  | 4.5   |
| ENSMUSG00000017390 | <i>Aldoc</i>   | 2.85   | 2.89   | 2.61  | 2.34  |
| ENSMUSG00000017418 | <i>Arl5b</i>   | 3.11   | 2.12   | 2.79  | 2.26  |
| ENSMUSG00000017421 | <i>Zfp207</i>  | 4.67   | 4.44   | 4.61  | 4.26  |
| ENSMUSG00000017428 | <i>Psmc11</i>  | 4.51   | 4.33   | 4.33  | 4.41  |
| ENSMUSG00000017446 | <i>C1qtnf1</i> | 3.21   | 3.8    | 3.33  | 3.38  |
| ENSMUSG00000017453 | <i>Pipox</i>   | 8.05   | 8.01   | 8.11  | 7.92  |
| ENSMUSG00000017466 | <i>Timp2</i>   | 3.1    | 2.84   | 3.26  | 2.67  |



|                    |                     |      |      |      |      |
|--------------------|---------------------|------|------|------|------|
| ENSMUSG00000017478 | <i>5830416A07Ri</i> | 3.11 | 3.76 | 3.34 | 3.08 |
| ENSMUSG00000017485 | <i>Top2b</i>        | 3.72 | 2.97 | 3.75 | 2.89 |
| ENSMUSG00000017491 | <i>Rarb</i>         | 0.69 | 0.71 | 1.59 | 0.95 |
| ENSMUSG00000017493 | <i>Igfbp4</i>       | 8.74 | 9.09 | 9.06 | 9    |
| ENSMUSG00000017548 | <i>Suz12</i>        | 3.84 | 2.77 | 3.1  | 2.51 |
| ENSMUSG00000017561 | <i>Cytor4</i>       | 2.32 | 1.95 | 2.14 | 2.12 |
| ENSMUSG00000017615 | <i>Tnfrsf1</i>      | 4.21 | 4.33 | 4.07 | 3.93 |
| ENSMUSG00000017639 | <i>Rab11fip4</i>    | 1.71 | 2.57 | 2.24 | 1.79 |
| ENSMUSG00000017664 | <i>Slc35c2</i>      | 4.75 | 5.12 | 4.89 | 4.72 |
| ENSMUSG00000017670 | <i>Elmo2</i>        | 1.42 | 1.75 | 1.93 | 1.66 |
| ENSMUSG00000017677 | <i>Wsb1</i>         | 3.72 | 1.82 | 2.39 | 2.02 |
| ENSMUSG00000017679 | <i>5830472M02R</i>  | 2.91 | 2.28 | 2.22 | 2.06 |
| ENSMUSG00000017686 | <i>Rhot1</i>        | 4.65 | 3.73 | 4.24 | 3.86 |
| ENSMUSG00000017707 | <i>Serinc3</i>      | 7.25 | 6.87 | 6.99 | 6.68 |
| ENSMUSG00000017713 | <i>Thal</i>         | 1.62 | 1.96 | 2.1  | 1.38 |
| ENSMUSG00000017715 | <i>Pgs1</i>         | 2.16 | 3.1  | 2.33 | 2.51 |
| ENSMUSG00000017718 | <i>Clast2</i>       | 7.33 | 7.52 | 7.05 | 6.66 |
| ENSMUSG00000017721 | <i>Pigt</i>         | 4.42 | 5.39 | 4.78 | 4.58 |
| ENSMUSG00000017747 | <i>Ghdc</i>         | 3.37 | 3.96 | 3.75 | 3.58 |
| ENSMUSG00000017754 | <i>Pltp</i>         | 4.07 | 4.33 | 4.18 | 4.25 |
| ENSMUSG00000017756 | <i>Slc12a7</i>      | 3.5  | 4.26 | 4.11 | 3.99 |
| ENSMUSG00000017760 | <i>Ctsa</i>         | 5.8  | 6.13 | 5.98 | 5.95 |
| ENSMUSG00000017764 | <i>Zswim1</i>       | 1.09 | 1.92 | 1.4  | 1.14 |
| ENSMUSG00000017765 | <i>Slc12a4</i>      | 2.12 | 2.97 | 2.14 | 2.58 |
| ENSMUSG00000017774 | <i>Myo1c</i>        | 3.59 | 3.9  | 3.34 | 3.4  |
| ENSMUSG00000017776 | <i>Crk</i>          | 5.01 | 4.45 | 4.63 | 4.17 |
| ENSMUSG00000017778 | <i>Cox7c</i>        | 5.18 | 4.21 | 5.36 | 4.99 |
| ENSMUSG00000017781 | <i>Pitpna</i>       | 5.31 | 5.31 | 5.3  | 5.16 |
| ENSMUSG00000017801 | <i>Mlx</i>          | 4.98 | 5.1  | 4.79 | 4.64 |
| ENSMUSG00000017802 | <i>1300010M03R</i>  | 5.72 | 5.89 | 5.75 | 5.49 |
| ENSMUSG00000017830 | <i>Dhx58</i>        | 2.12 | 2.33 | 1.54 | 1.94 |

|                    |                      |      |      |      |      |
|--------------------|----------------------|------|------|------|------|
| ENSMUSG00000017831 | <i>Rab5a</i>         | 5.04 | 4.05 | 4.62 | 4.33 |
| ENSMUSG00000017837 | <i>Nkiras2</i>       | 3.01 | 3.45 | 3.29 | 3.08 |
| ENSMUSG00000017843 | <i>Ppp2r5c</i>       | 4.11 | 3.97 | 3.7  | 3.42 |
| ENSMUSG00000017858 | <i>Ift52</i>         | 4.36 | 4.38 | 4.29 | 3.96 |
| ENSMUSG00000017868 | <i>Sgk2</i>          | 5.46 | 5.31 | 5.15 | 4.72 |
| ENSMUSG00000017929 | <i>B4galt5</i>       | 3.46 | 4.13 | 4    | 4.09 |
| ENSMUSG00000017950 | <i>Hnf4a</i>         | 8.2  | 8.82 | 7.91 | 8    |
| ENSMUSG00000017978 | <i>Cadps2</i>        | 2.17 | 1.58 | 1.73 | 1.49 |
| ENSMUSG00000017999 | <i>Ddx27</i>         | 3.34 | 4.12 | 3.43 | 3.33 |
| ENSMUSG00000018001 | <i>Pscd3</i>         | 1.36 | 1.04 | 1.2  | 0.75 |
| ENSMUSG00000018040 | <i>I110014J01Rik</i> | 3.36 | 3.38 | 3.36 | 3.28 |
| ENSMUSG00000018042 | <i>Cyb5r3</i>        | 7.6  | 8.12 | 7.75 | 7.71 |
| ENSMUSG00000018076 | <i>Thrap2</i>        | 1.34 | 2    | 1.58 | 1.86 |
| ENSMUSG00000018102 | <i>Hist1h2bc</i>     | 6.75 | 6.82 | 6.77 | 6.64 |
| ENSMUSG00000018143 | <i>Mafk</i>          | 2.47 | 2.54 | 3.08 | 2.59 |
| ENSMUSG00000018160 | <i>Med1</i>          | 3.18 | 2.77 | 2.82 | 2.34 |
| ENSMUSG00000018166 | <i>ErbB3</i>         | 4.72 | 4.56 | 5.22 | 4.7  |
| ENSMUSG00000018167 | <i>Stard3</i>        | 3.03 | 3.8  | 3.22 | 3.55 |
| ENSMUSG00000018171 | <i>Tmem49</i>        | 6.41 | 5.4  | 5.73 | 5.39 |
| ENSMUSG00000018189 | <i>Uchl5</i>         | 4.5  | 3.67 | 4.06 | 3.68 |
| ENSMUSG00000018196 | <i>Glrx2</i>         | 4.37 | 4.69 | 4.38 | 4.13 |
| ENSMUSG00000018209 | <i>Stk4</i>          | 3.38 | 2.93 | 3.49 | 2.94 |
| ENSMUSG00000018217 | <i>Pmp22</i>         | 1.11 | 0.57 | 0.7  | 0.44 |
| ENSMUSG00000018239 | <i>Zcchc10</i>       | 2.04 | 0.99 | 1.64 | 1.46 |
| ENSMUSG00000018286 | <i>Psm6</i>          | 6.09 | 6.84 | 6.59 | 6.32 |
| ENSMUSG00000018287 | <i>Spag7</i>         | 4.78 | 5.2  | 5    | 4.89 |
| ENSMUSG00000018293 | <i>Pfn1</i>          | 7.66 | 7.41 | 7.63 | 7.46 |
| ENSMUSG00000018322 | <i>Tomm34</i>        | 3.02 | 2.91 | 3.22 | 2.84 |
| ENSMUSG00000018326 | <i>Ywhab</i>         | 6.55 | 6.26 | 6.32 | 5.92 |
| ENSMUSG00000018339 | <i>Gpx3</i>          | 1.63 | 2.51 | 3    | 2.14 |
| ENSMUSG00000018340 | <i>Anxa6</i>         | 6.02 | 6.49 | 6.04 | 5.88 |

|                    |                     |      |      |      |      |
|--------------------|---------------------|------|------|------|------|
| ENSMUSG00000018347 | <i>Zkscan6</i>      | 1.24 | 1.4  | 1.09 | 0.7  |
| ENSMUSG00000018363 | <i>Smurf2</i>       | 4.2  | 3.58 | 3.69 | 3.54 |
| ENSMUSG00000018372 | <i>BC058545</i>     | 1.06 | 0.86 | 1.26 | 0.98 |
| ENSMUSG00000018377 | <i>Vezfl</i>        | 2.98 | 2.59 | 2.67 | 2.5  |
| ENSMUSG00000018379 | <i>Sfrs1</i>        | 4.42 | 3.54 | 4.03 | 3.58 |
| ENSMUSG00000018381 | <i>Abi3</i>         | 2.16 | 2.85 | 1.58 | 1.89 |
| ENSMUSG00000018387 | <i>Shroom1</i>      | 3.98 | 4.3  | 3.75 | 3.43 |
| ENSMUSG00000018401 | <i>Mtmr4</i>        | 4.32 | 4.57 | 3.69 | 3.56 |
| ENSMUSG00000018412 | <i>I700081L11Ri</i> | 3.1  | 3.1  | 3.29 | 3.38 |
| ENSMUSG00000018415 | <i>4933439F18Ri</i> | 4.32 | 4.15 | 4.16 | 3.89 |
| ENSMUSG00000018417 | <i>Myo1b</i>        | 6.75 | 6.02 | 6.51 | 5.95 |
| ENSMUSG00000018425 | <i>Dhx40</i>        | 4.56 | 3.95 | 4.3  | 3.93 |
| ENSMUSG00000018427 | <i>Ypel2</i>        | 2.88 | 2.53 | 2.57 | 1.86 |
| ENSMUSG00000018428 | <i>Akap1</i>        | 5.17 | 5.77 | 5.54 | 5.44 |
| ENSMUSG00000018433 | <i>Nol11</i>        | 2.85 | 2.94 | 2.75 | 2.52 |
| ENSMUSG00000018442 | <i>Derl2</i>        | 6.6  | 5.97 | 6.06 | 5.91 |
| ENSMUSG00000018446 | <i>Clqbp</i>        | 6.45 | 5.92 | 6.26 | 6.04 |
| ENSMUSG00000018449 | <i>Rpain</i>        | 3.32 | 3.9  | 3.91 | 3.9  |
| ENSMUSG00000018459 | <i>Slc13a3</i>      | 3.86 | 4.47 | 3.87 | 3.94 |
| ENSMUSG00000018474 | <i>Chd3</i>         | 3.24 | 3.49 | 3.29 | 2.99 |
| ENSMUSG00000018476 | <i>Jmjd3</i>        | 1.71 | 2.67 | 2.44 | 1.89 |
| ENSMUSG00000018481 | <i>Appbp2</i>       | 3.61 | 2.78 | 3.19 | 3.01 |
| ENSMUSG00000018501 | <i>Ncor1</i>        | 4.23 | 4.03 | 4.11 | 3.9  |
| ENSMUSG00000018509 | <i>NA</i>           | 3.26 | 3.82 | 3.84 | 3.79 |
| ENSMUSG00000018541 | <i>Ccdc49</i>       | 2.27 | 2.09 | 2.06 | 1.79 |
| ENSMUSG00000018547 | <i>Pip4k2b</i>      | 3.15 | 3.09 | 2.73 | 2.71 |
| ENSMUSG00000018548 | <i>Trim37</i>       | 2.36 | 2.12 | 2.15 | 1.88 |
| ENSMUSG00000018559 | <i>Dullard</i>      | 4.61 | 4.91 | 4.85 | 4.72 |
| ENSMUSG00000018565 | <i>Rai12</i>        | 3.98 | 4.55 | 4.03 | 4.17 |
| ENSMUSG00000018567 | <i>Gabarap</i>      | 8.3  | 7.91 | 8.16 | 8.06 |
| ENSMUSG00000018572 | <i>Phf23</i>        | 4.08 | 3.76 | 3.57 | 3.39 |

|                    |                          |      |      |      |      |
|--------------------|--------------------------|------|------|------|------|
| ENSMUSG00000018574 | <i>Acadyl</i>            | 7.99 | 7.97 | 7.96 | 7.71 |
| ENSMUSG00000018583 | <i>G3BP</i>              | 3.96 | 3.66 | 3.73 | 3.51 |
| ENSMUSG00000018585 | <i>Atox1</i>             | 6.43 | 6.27 | 7.14 | 7    |
| ENSMUSG00000018593 | <i>Sparc</i>             | 6.1  | 6.39 | 5.95 | 5.93 |
| ENSMUSG00000018599 | <i>Smcr7</i>             | 3.04 | 3.43 | 3.39 | 3.06 |
| ENSMUSG00000018604 | <i>Tbx3</i>              | 3.18 | 3.39 | 3.1  | 3.45 |
| ENSMUSG00000018648 | <i>Dusp14</i>            | 2.15 | 1.95 | 2.43 | 1.22 |
| ENSMUSG00000018651 | <i>Tada2l</i>            | 1.64 | 1.79 | 1.55 | 1.22 |
| ENSMUSG00000018659 | <i>Pnpo</i>              | 6.66 | 6.57 | 6.44 | 6.36 |
| ENSMUSG00000018661 | <i>Cog1</i>              | 2.94 | 3.65 | 3.46 | 3.21 |
| ENSMUSG00000018666 | <i>Cbx1</i>              | 2.8  | 2.75 | 2.73 | 2.77 |
| ENSMUSG00000018669 | <i>Cdk5rap3</i>          | 4.32 | 5.27 | 4.49 | 4.62 |
| ENSMUSG00000018672 | <i>Copz2</i>             | 5.39 | 5.27 | 5.42 | 4.92 |
| ENSMUSG00000018677 | <i>Slc25a39</i>          | 7.83 | 8.66 | 8.22 | 7.95 |
| ENSMUSG00000018678 | <i>Sp2</i>               | 1.35 | 1.77 | 1.47 | 1.2  |
| ENSMUSG00000018697 | <i>Aatf</i>              | 3.16 | 3.32 | 3.49 | 2.96 |
| ENSMUSG00000018707 | <i>Dync1h1</i>           | 3.35 | 3.92 | 3.7  | 3.65 |
| ENSMUSG00000018727 | <i>D11Ert636e</i>        | 1.07 | 1.36 | 2.7  | 1.44 |
| ENSMUSG00000018733 | <i>Pex12</i>             | 3.25 | 2.93 | 2.9  | 2.49 |
| ENSMUSG00000018736 | <i>Ndel1</i>             | 3.73 | 3.57 | 4.19 | 4.02 |
| ENSMUSG00000018750 | <i>Zbtb4</i>             | 1.73 | 1.82 | 1.81 | 1.86 |
| ENSMUSG00000018752 | <i>Tnfrsf12-tnfrsf13</i> | 1.83 | 2.46 | 2.19 | 2.01 |
| ENSMUSG00000018761 | <i>Mpdul</i>             | 5.45 | 5.75 | 5.53 | 5.54 |
| ENSMUSG00000018765 | <i>Fxr2</i>              | 4.2  | 4.66 | 4.33 | 4.33 |
| ENSMUSG00000018770 | <i>Atp5g3</i>            | 8.9  | 7.78 | 8.55 | 8.23 |
| ENSMUSG00000018774 | <i>Cd68</i>              | 2.65 | 2.92 | 3.02 | 2.72 |
| ENSMUSG00000018796 | <i>Acs1l</i>             | 8.55 | 8.94 | 8.04 | 8.14 |
| ENSMUSG00000018800 | <i>Abca5</i>             | 1.51 | 0.71 | 0.9  | 0.54 |
| ENSMUSG00000018819 | <i>Lsp1</i>              | 0.51 | 0.74 | 1.65 | 0.53 |
| ENSMUSG00000018820 | <i>Zfyve27</i>           | 2.05 | 2.37 | 2.27 | 2.34 |
| ENSMUSG00000018821 | <i>Avpil</i>             | 3.52 | 4.24 | 4.18 | 4.29 |

|                    |                 |        |        |      |      |
|--------------------|-----------------|--------|--------|------|------|
| ENSMUSG00000018841 | <i>Rad51l3</i>  | 2.53   | 2.78   | 2.8  | 2.1  |
| ENSMUSG00000018846 | <i>Pank3</i>    | 4.15   | 2.55   | 3.46 | 2.87 |
| ENSMUSG00000018848 | <i>Rars</i>     | 4.49   | 4.19   | 4.38 | 4.19 |
| ENSMUSG00000018849 | <i>Wwcl</i>     | 3.84   | 4.56   | 3.89 | 4.18 |
| ENSMUSG00000018858 | <i>Ict1</i>     | 5.31   | 5.41   | 5.37 | 4.95 |
| ENSMUSG00000018861 | <i>Fdxr</i>     | 2.64   | 3.64   | 3.23 | 3.15 |
| ENSMUSG00000018882 | <i>Mrpl45</i>   | 4.38   | 4.55   | 4.61 | 4.49 |
| ENSMUSG00000018893 | <i>Mb</i>       | #NAME? | #NAME? | 3.67 | 4.03 |
| ENSMUSG00000018899 | <i>Irf1</i>     | 2.61   | 3.32   | 2.73 | 2.54 |
| ENSMUSG00000018900 | <i>Slc22a5</i>  | 4.17   | 3.43   | 3.68 | 2.82 |
| ENSMUSG00000018906 | <i>P4ha2</i>    | 1.98   | 2.09   | 2.66 | 2.59 |
| ENSMUSG00000018909 | <i>Arrb1</i>    | 2.15   | 2.15   | 1.56 | 1.93 |
| ENSMUSG00000018920 | <i>Cxcl16</i>   | 2.08   | 2.13   | 2.14 | 1.96 |
| ENSMUSG00000018921 | <i>Pelp1</i>    | 2.33   | 2.93   | 2.55 | 2.38 |
| ENSMUSG00000018923 | <i>Med11</i>    | 2.76   | 3.49   | 3.22 | 3.03 |
| ENSMUSG00000018927 | <i>Ccl6</i>     | 4.45   | 3.71   | 4.17 | 3.74 |
| ENSMUSG00000018931 | <i>Gtlf3b</i>   | 1.69   | 1.81   | 2.07 | 1.59 |
| ENSMUSG00000018932 | <i>Map2k3</i>   | 5.12   | 5.56   | 5.6  | 5.42 |
| ENSMUSG00000018965 | <i>Ywhah</i>    | 3.69   | 3.47   | 3.35 | 3.28 |
| ENSMUSG00000018974 | <i>Sart3</i>    | 2.17   | 2.71   | 2.22 | 2.05 |
| ENSMUSG00000018995 | <i>Nars2</i>    | 2.84   | 2.1    | 2.41 | 1.79 |
| ENSMUSG00000018999 | <i>Slc35b4</i>  | 3.69   | 3.96   | 3.7  | 3.43 |
| ENSMUSG00000019039 | <i>Dalrd3</i>   | 4.55   | 4.85   | 4.52 | 4.41 |
| ENSMUSG00000019054 | <i>Fis1</i>     | 5.42   | 5.93   | 5.81 | 5.53 |
| ENSMUSG00000019055 | <i>Plod1</i>    | 4.29   | 4.68   | 4.3  | 4.41 |
| ENSMUSG00000019066 | <i>Rab3d</i>    | 1.37   | 2.25   | 1.43 | 1.62 |
| ENSMUSG00000019080 | <i>Mfsd3</i>    | 2.44   | 3      | 2.53 | 2.63 |
| ENSMUSG00000019082 | <i>Slc25a22</i> | 7.38   | 6.96   | 7.54 | 7.01 |
| ENSMUSG00000019087 | <i>Atp6ap1</i>  | 5.71   | 5.87   | 5.71 | 5.5  |
| ENSMUSG00000019088 | <i>Dnase1l1</i> | 1.74   | 1.42   | 1.29 | 0.81 |
| ENSMUSG00000019122 | <i>Ccl9</i>     | 7.19   | 6.29   | 6.98 | 6.37 |

|                    |                     |      |      |      |      |
|--------------------|---------------------|------|------|------|------|
| ENSMUSG00000019132 | <i>BC005537</i>     | 6.86 | 6.08 | 6.47 | 5.88 |
| ENSMUSG00000019139 | <i>Isynal</i>       | 1.38 | 1.58 | 1.61 | 1.27 |
| ENSMUSG00000019143 | <i>Hars2</i>        | 3.5  | 3.54 | 3.83 | 3.43 |
| ENSMUSG00000019158 | <i>Tmem160</i>      | 3.86 | 5.08 | 4.45 | 4.49 |
| ENSMUSG00000019173 | <i>Rab5c</i>        | 5.93 | 6.18 | 6.09 | 5.86 |
| ENSMUSG00000019179 | <i>Mdh2</i>         | 7.41 | 7.47 | 7.73 | 7.43 |
| ENSMUSG00000019188 | <i>Hm13</i>         | 5.59 | 6.04 | 5.63 | 5.67 |
| ENSMUSG00000019189 | <i>Rnf145</i>       | 1.89 | 2.42 | 2.24 | 2.51 |
| ENSMUSG00000019194 | <i>Scn1b</i>        | 0.67 | 2.17 | 1.56 | 1.75 |
| ENSMUSG00000019210 | <i>Atp6v1e1</i>     | 6.19 | 6.08 | 6.53 | 6.21 |
| ENSMUSG00000019232 | <i>Agxt2ll</i>      | 6.2  | 5.34 | 6.56 | 5.75 |
| ENSMUSG00000019254 | <i>Ppp1r12c</i>     | 2.92 | 3.84 | 3.29 | 3.31 |
| ENSMUSG00000019256 | <i>Ahr</i>          | 3.69 | 3.17 | 3.38 | 3.26 |
| ENSMUSG00000019261 | <i>Mtap1s</i>       | 0.56 | 2.32 | 1.27 | 1.16 |
| ENSMUSG00000019295 | <i>Tmem129</i>      | 4.09 | 4.2  | 4.15 | 3.92 |
| ENSMUSG00000019297 | <i>2610027L16Ri</i> | 6.39 | 6.7  | 6.56 | 6.38 |
| ENSMUSG00000019302 | <i>Atp6v0a1</i>     | 4.71 | 5.14 | 4.81 | 4.54 |
| ENSMUSG00000019312 | <i>Grb7</i>         | 5.82 | 6.31 | 6.35 | 6.22 |
| ENSMUSG00000019338 | <i>Zfp687</i>       | 1.57 | 2.04 | 1.55 | 1.11 |
| ENSMUSG00000019362 | <i>D8ErtD738e</i>   | 5.97 | 6.73 | 6.74 | 6.8  |
| ENSMUSG00000019368 | <i>Sec14l4</i>      | 6.79 | 6.85 | 6.93 | 6.49 |
| ENSMUSG00000019370 | <i>Calm3</i>        | 4.16 | 4.61 | 4.34 | 3.99 |
| ENSMUSG00000019373 | <i>Cops3</i>        | 5.4  | 5.19 | 5.46 | 4.99 |
| ENSMUSG00000019428 | <i>SAM11</i>        | 6.9  | 7.74 | 7.07 | 6.81 |
| ENSMUSG00000019432 | <i>Bat1a</i>        | 3.96 | 4.67 | 4.47 | 4.06 |
| ENSMUSG00000019433 | <i>Gipc1</i>        | 2.48 | 3.73 | 3.09 | 3.07 |
| ENSMUSG00000019437 | <i>Tlcd1</i>        | 3.86 | 3.93 | 4.22 | 4.07 |
| ENSMUSG00000019461 | <i>Plscr3</i>       | 1.61 | 1.96 | 1.55 | 0.95 |
| ENSMUSG00000019464 | <i>Ptger1</i>       | 1.71 | 2.25 | 1.78 | 1.6  |
| ENSMUSG00000019470 | <i>Xab2</i>         | 2.74 | 3.76 | 3.11 | 2.79 |
| ENSMUSG00000019471 | <i>Cdc37</i>        | 5.73 | 6.25 | 5.87 | 5.69 |

|                    |                      |       |      |      |      |
|--------------------|----------------------|-------|------|------|------|
| ENSMUSG00000019478 | <i>Rab4a</i>         | 4.69  | 5.11 | 5.19 | 5.08 |
| ENSMUSG00000019487 | <i>Trip10</i>        | 1.8   | 2.33 | 2.07 | 1.97 |
| ENSMUSG00000019494 | <i>COPS6</i>         | 6.45  | 6.75 | 6.69 | 6.37 |
| ENSMUSG00000019505 | <i>Ubb</i>           | 5.57  | 6.09 | 5.83 | 5.65 |
| ENSMUSG00000019518 | <i>Ap4m1</i>         | 2.73  | 2.8  | 2.89 | 3.07 |
| ENSMUSG00000019528 | <i>Gyg</i>           | 2.22  | 1.91 | 2.11 | 2.17 |
| ENSMUSG00000019539 | <i>Rcn3</i>          | 1.8   | 3.35 | 2.59 | 2.72 |
| ENSMUSG00000019577 | <i>Pdk4</i>          | 2.07  | 1.01 | 2.02 | 1.58 |
| ENSMUSG00000019578 | <i>Ubxdl</i>         | 4.58  | 5.11 | 5.15 | 4.94 |
| ENSMUSG00000019579 | <i>D17Wsu104e</i>    | 5.57  | 6.53 | 6.03 | 6    |
| ENSMUSG00000019590 | <i>Cyb56l</i>        | -0.33 | 1.47 | 1.09 | 0.48 |
| ENSMUSG00000019659 | <i>Ccdc12</i>        | 1.18  | 2.15 | 1.3  | 1.91 |
| ENSMUSG00000019689 | <i>I110001J03Rik</i> | 5.48  | 5.29 | 5.72 | 5.56 |
| ENSMUSG00000019710 | <i>Mrpl24</i>        | 5.55  | 5.69 | 5.61 | 5.63 |
| ENSMUSG00000019715 | <i>Gle1l</i>         | 3.54  | 3.54 | 3.7  | 3.52 |
| ENSMUSG00000019718 | <i>2810055F11Ri</i>  | 3.83  | 2.75 | 3.74 | 3.26 |
| ENSMUSG00000019726 | <i>Lyst</i>          | 2.27  | 1.88 | 2.23 | 1.82 |
| ENSMUSG00000019731 | <i>Slc35e1</i>       | 4.57  | 4.86 | 4.55 | 4.42 |
| ENSMUSG00000019732 | <i>Calr3</i>         | 1.22  | 0.41 | 0.51 | 0.45 |
| ENSMUSG00000019738 | <i>Polr2i</i>        | 4.95  | 5.1  | 6.8  | 6.76 |
| ENSMUSG00000019755 | <i>Tmem189</i>       | 2.93  | 2.94 | 3.26 | 3.17 |
| ENSMUSG00000019762 | <i>lyd</i>           | 6.55  | 6.24 | 6.59 | 6.28 |
| ENSMUSG00000019763 | <i>Rmnd1</i>         | 1.61  | 1.2  | 1.69 | 1.48 |
| ENSMUSG00000019768 | <i>Esr1</i>          | 4.05  | 3.63 | 2.59 | 2.09 |
| ENSMUSG00000019774 | <i>Mtrfl1</i>        | 2.29  | 2.06 | 2.28 | 2.05 |
| ENSMUSG00000019777 | <i>Hdac2</i>         | 2.88  | 2.5  | 2.62 | 2.18 |
| ENSMUSG00000019779 | <i>Frk</i>           | 1.82  | 1.01 | 1.3  | 0.75 |
| ENSMUSG00000019782 | <i>Rwdd1</i>         | 2     | 2.18 | 2.19 | 2.1  |
| ENSMUSG00000019790 | <i>Stxbp5</i>        | 1.58  | 1.46 | 1.62 | 1.26 |
| ENSMUSG00000019791 | <i>Hint3</i>         | 5.3   | 4.26 | 4.93 | 4.5  |
| ENSMUSG00000019792 | <i>Trmt11</i>        | 2.16  | 1.55 | 2.09 | 1.57 |

|                    |                     |      |      |      |      |
|--------------------|---------------------|------|------|------|------|
| ENSMUSG00000019794 | <i>Katnal</i>       | 3.26 | 2.78 | 2.95 | 2.63 |
| ENSMUSG00000019795 | <i>Pcmt1</i>        | 4.68 | 4.26 | 4.29 | 3.95 |
| ENSMUSG00000019797 | <i>I700021F05Ri</i> | 3.94 | 3.14 | 3.74 | 3.22 |
| ENSMUSG00000019802 | <i>Sec63</i>        | 5.11 | 4.62 | 4.63 | 4.16 |
| ENSMUSG00000019804 | <i>Snx3</i>         | 6.55 | 6.26 | 6.38 | 6.14 |
| ENSMUSG00000019806 | <i>Aigl</i>         | 3.56 | 3.65 | 3.21 | 2.47 |
| ENSMUSG00000019808 | <i>Deadc1</i>       | 2.29 | 2.41 | 2.67 | 2.96 |
| ENSMUSG00000019809 | <i>Pex3</i>         | 4.48 | 3.75 | 4.44 | 4.06 |
| ENSMUSG00000019810 | <i>Fuca2</i>        | 1.33 | 0.86 | 1.48 | 1.18 |
| ENSMUSG00000019813 | <i>2410017P07Ri</i> | 1.15 | 0.43 | 1.51 | 1.1  |
| ENSMUSG00000019814 | <i>Ltv1</i>         | 3.59 | 3.43 | 3.34 | 3.12 |
| ENSMUSG00000019818 | <i>Cd164</i>        | 8.06 | 7.12 | 7.43 | 6.93 |
| ENSMUSG00000019820 | <i>Utrn</i>         | 2.16 | 1.82 | 2    | 1.74 |
| ENSMUSG00000019822 | <i>Smpd2</i>        | 3.93 | 4.28 | 4.81 | 4.6  |
| ENSMUSG00000019826 | <i>Zbtb24</i>       | 2.43 | 2.35 | 2.28 | 2.1  |
| ENSMUSG00000019832 | <i>Rab32</i>        | 4.97 | 5.18 | 5.01 | 4.6  |
| ENSMUSG00000019837 | <i>Gtf3c6</i>       | 4.21 | 4.3  | 4.37 | 3.87 |
| ENSMUSG00000019838 | <i>Slc16a10</i>     | 5.64 | 5.29 | 5.66 | 5.35 |
| ENSMUSG00000019841 | <i>Sez4</i>         | 1.7  | 1.05 | 1.81 | 1.17 |
| ENSMUSG00000019842 | <i>Traf3ip2</i>     | 1.01 | 1.02 | 0.67 | 0.8  |
| ENSMUSG00000019843 | <i>Fyn</i>          | 1.99 | 2.43 | 1.76 | 1.64 |
| ENSMUSG00000019849 | <i>Prep</i>         | 3.81 | 4.15 | 4.03 | 3.82 |
| ENSMUSG00000019851 | <i>Perp</i>         | 6.61 | 5.86 | 5.91 | 5.57 |
| ENSMUSG00000019854 | <i>Reps1</i>        | 3.82 | 3.38 | 3.87 | 3.67 |
| ENSMUSG00000019857 | <i>Asfla</i>        | 2.64 | 1.24 | 1.83 | 1.46 |
| ENSMUSG00000019861 | <i>Gopc</i>         | 3.52 | 3.11 | 3.34 | 2.76 |
| ENSMUSG00000019863 | <i>Qrsll</i>        | 1.8  | 1.73 | 1.59 | 1.46 |
| ENSMUSG00000019864 | <i>Rtn4ip1</i>      | 3.86 | 3.7  | 3.95 | 3.17 |
| ENSMUSG00000019866 | <i>NA</i>           | 4.15 | 2.97 | 3.65 | 3.07 |
| ENSMUSG00000019868 | <i>Vta1</i>         | 3.65 | 3.88 | 3.98 | 3.67 |
| ENSMUSG00000019872 | <i>Smpdl3a</i>      | 5.1  | 4.65 | 4.91 | 4.69 |



|                    |                  |      |      |      |      |
|--------------------|------------------|------|------|------|------|
| ENSMUSG00000019873 | <i>Reep3</i>     | 5.3  | 4.74 | 4.9  | 4.87 |
| ENSMUSG00000019874 | <i>Fabp7</i>     | 2.41 | 1.95 | 1.1  | 1.86 |
| ENSMUSG00000019877 | <i>Serinc1</i>   | 6.99 | 6.62 | 6.88 | 6.42 |
| ENSMUSG00000019878 | <i>Hsf2</i>      | 3.7  | 3    | 3.47 | 3.24 |
| ENSMUSG00000019880 | <i>Rspo3</i>     | 2.1  | 1.56 | 1.94 | 1.42 |
| ENSMUSG00000019883 | <i>Echdc1</i>    | 5.99 | 5.09 | 5.25 | 4.75 |
| ENSMUSG00000019889 | <i>Ptprk</i>     | 3.95 | 4.23 | 3.96 | 3.9  |
| ENSMUSG00000019891 | <i>Dcbl1</i>     | 1.5  | 1.63 | 1.36 | 1.48 |
| ENSMUSG00000019897 | <i>Ccdc59</i>    | 4.29 | 3.69 | 4.13 | 3.66 |
| ENSMUSG00000019906 | <i>Lin7a</i>     | 2.45 | 2.33 | 1.62 | 1.71 |
| ENSMUSG00000019907 | <i>Ppp1r12a</i>  | 2.88 | 2.61 | 2.8  | 2.5  |
| ENSMUSG00000019916 | <i>P4hal</i>     | 2.93 | 2.67 | 2.91 | 3.24 |
| ENSMUSG00000019917 | <i>10-Sep</i>    | 2.89 | 2.05 | 2.72 | 2.08 |
| ENSMUSG00000019920 | <i>Lims1</i>     | 2.94 | 2.06 | 2.77 | 1.95 |
| ENSMUSG00000019923 | <i>Zwint</i>     | 4.66 | 4.6  | 4.36 | 4.25 |
| ENSMUSG00000019927 | <i>Ube2d1</i>    | 3.5  | 2.32 | 3.45 | 2.79 |
| ENSMUSG00000019929 | <i>Dcn</i>       | 7.38 | 7.09 | 7.2  | 7.16 |
| ENSMUSG00000019935 | <i>Slc17a8</i>   | 2.35 | 1.37 | 2.14 | 1.41 |
| ENSMUSG00000019943 | <i>Atp2b1</i>    | 3.33 | 3.08 | 3.35 | 3.12 |
| ENSMUSG00000019944 | <i>Rhobtb1</i>   | 5.04 | 4.76 | 4.45 | 4.05 |
| ENSMUSG00000019947 | <i>Arid5b</i>    | 4.2  | 2.91 | 3.44 | 3.49 |
| ENSMUSG00000019948 | <i>Actr6</i>     | 3.73 | 2.28 | 3.24 | 2.58 |
| ENSMUSG00000019951 | <i>mKIAA0701</i> | 3.85 | 3.56 | 3.47 | 3.12 |
| ENSMUSG00000019952 | <i>Wdr51b</i>    | 1.84 | 1.49 | 1.95 | 1.73 |
| ENSMUSG00000019960 | <i>Dusp6</i>     | 4.22 | 3.81 | 3.49 | 4.16 |
| ENSMUSG00000019961 | <i>Tmpo</i>      | 2.84 | 2.85 | 2.85 | 2.54 |
| ENSMUSG00000019969 | <i>Psen1</i>     | 4.32 | 4.31 | 4.38 | 4.1  |
| ENSMUSG00000019970 | <i>Sgk</i>       | 3.66 | 4.05 | 3.4  | 3.34 |
| ENSMUSG00000019977 | <i>Hbs1l</i>     | 4.47 | 4.35 | 4.31 | 4.05 |
| ENSMUSG00000019978 | <i>Epb4.1l2</i>  | 1.67 | 1.93 | 1.48 | 1.33 |
| ENSMUSG00000019984 | <i>Sur2</i>      | 2.01 | 2.04 | 1.97 | 1.65 |

|                    |                      |       |       |       |       |
|--------------------|----------------------|-------|-------|-------|-------|
| ENSMUSG00000019987 | <i>Arg1</i>          | 10.44 | 10.21 | 10.66 | 10.83 |
| ENSMUSG00000019988 | <i>Nedd1</i>         | 2.42  | 1.52  | 2.24  | 1.78  |
| ENSMUSG00000019989 | <i>Enpp3</i>         | 3.31  | 3.07  | 3.7   | 3.5   |
| ENSMUSG00000019990 | <i>Pde7b</i>         | 1.88  | 0.87  | 0.99  | 1.21  |
| ENSMUSG00000019996 | <i>Mtap7</i>         | 2.73  | 3.17  | 3.13  | 2.89  |
| ENSMUSG00000019997 | <i>Ctgf</i>          | 2.98  | 2.62  | 2.93  | 2.67  |
| ENSMUSG00000019998 | <i>Stx7</i>          | 4.05  | 3.2   | 3.65  | 3.22  |
| ENSMUSG00000020003 | <i>Pex7</i>          | 5.91  | 5.72  | 5.78  | 5.34  |
| ENSMUSG00000020009 | <i>Ifngr1</i>        | 4.13  | 3.82  | 4.02  | 3.66  |
| ENSMUSG00000020010 | <i>Vnn3</i>          | 6.4   | 6.03  | 5.92  | 5.73  |
| ENSMUSG00000020015 | <i>Pctk2</i>         | 2.87  | 2.35  | 2.76  | 2.44  |
| ENSMUSG00000020017 | <i>Hal</i>           | 7.19  | 7.82  | 7.55  | 7.33  |
| ENSMUSG00000020019 | <i>Ntn4</i>          | 1.43  | 1.68  | 1.58  | 1.84  |
| ENSMUSG00000020021 | <i>Fgd6</i>          | 3.65  | 3.22  | 3.33  | 3.26  |
| ENSMUSG00000020022 | <i>Ndufa12</i>       | 5.68  | 5.54  | 5.85  | 5.98  |
| ENSMUSG00000020023 | <i>Tmcc3</i>         | 1.69  | 1.92  | 2.2   | 1.66  |
| ENSMUSG00000020024 | <i>Ccdc41</i>        | 1.87  | 1.02  | 1.64  | 1.07  |
| ENSMUSG00000020027 | <i>AK033206</i>      | 1.78  | 1.49  | -0.9  | -0.51 |
| ENSMUSG00000020029 | <i>AK202794</i>      | 6.67  | 5.8   | 6.43  | 5.99  |
| ENSMUSG00000020034 | <i>Tcp1l12</i>       | 4.07  | 3.47  | 3.92  | 3.56  |
| ENSMUSG00000020037 | <i>Rfx4</i>          | 0.52  | 0.5   | 1.02  | 0.32  |
| ENSMUSG00000020038 | <i>Cry1</i>          | 3.5   | 3.52  | 2.56  | 1.86  |
| ENSMUSG00000020044 | <i>Timp3</i>         | 4.08  | 3.31  | 3.63  | 3.48  |
| ENSMUSG00000020048 | <i>Hsp90b1</i>       | 8.73  | 8.6   | 8.01  | 7.91  |
| ENSMUSG00000020051 | <i>Pah</i>           | 9.64  | 9.14  | 9.75  | 9.33  |
| ENSMUSG00000020053 | <i>Igf1</i>          | 7.15  | 6.47  | 6.6   | 6.44  |
| ENSMUSG00000020056 | <i>Ccdc53</i>        | 4.54  | 4.08  | 4.76  | 4.37  |
| ENSMUSG00000020059 | <i>Sycp3</i>         | 3.24  | 0.84  | 2.67  | 1.51  |
| ENSMUSG00000020063 | <i>Sirt1</i>         | 2.34  | 1.27  | 2.25  | 1.55  |
| ENSMUSG00000020064 | <i>Herc4</i>         | 3.92  | 3.18  | 3.62  | 3.14  |
| ENSMUSG00000020068 | <i>3110049J23RiA</i> | 6.28  | 6.48  | 6.26  | 5.95  |

|                    |                     |      |      |      |      |
|--------------------|---------------------|------|------|------|------|
| ENSMUSG00000020069 | <i>Hnrph3</i>       | 2.66 | 2.79 | 2.8  | 2.67 |
| ENSMUSG00000020072 | <i>Pbld</i>         | 6.81 | 6.87 | 7.24 | 6.9  |
| ENSMUSG00000020074 | <i>Ccar1</i>        | 4.38 | 3.79 | 3.85 | 3.12 |
| ENSMUSG00000020075 | <i>Ddx21</i>        | 4.04 | 3.9  | 4.03 | 3.82 |
| ENSMUSG00000020076 | <i>Ddx50</i>        | 3.82 | 2.65 | 3.14 | 2.72 |
| ENSMUSG00000020077 | <i>Srgn</i>         | 3.65 | 3.05 | 3.31 | 2.93 |
| ENSMUSG00000020078 | <i>Vps26a</i>       | 5.13 | 4.21 | 4.79 | 4.32 |
| ENSMUSG00000020079 | <i>Supv3l1</i>      | 3.4  | 3.53 | 3.89 | 3.66 |
| ENSMUSG00000020083 | <i>2010107G23R4</i> | 0.91 | 2.05 | 1.1  | 1.44 |
| ENSMUSG00000020085 | <i>Aifm2</i>        | 3.8  | 3.66 | 4.01 | 3.38 |
| ENSMUSG00000020087 | <i>NA</i>           | 4.47 | 5.56 | 5.16 | 5.11 |
| ENSMUSG00000020088 | <i>Sar1a</i>        | 5.96 | 5.18 | 5.39 | 5.55 |
| ENSMUSG00000020089 | <i>Ppal</i>         | 7.16 | 6.7  | 7.07 | 6.47 |
| ENSMUSG00000020091 | <i>Eif4ebp2</i>     | 6.82 | 7.27 | 6.95 | 6.9  |
| ENSMUSG00000020092 | <i>X99384</i>       | 1.49 | 2.43 | 1.53 | 1.23 |
| ENSMUSG00000020097 | <i>Sgpl1</i>        | 4.82 | 4.75 | 4.6  | 4.3  |
| ENSMUSG00000020098 | <i>Pcbd1</i>        | 8.65 | 8.49 | 8.34 | 8.03 |
| ENSMUSG00000020102 | <i>Slc16a7</i>      | 5.47 | 4.32 | 5.08 | 4.43 |
| ENSMUSG00000020105 | <i>Lrig3</i>        | 1.45 | 1.67 | 1.89 | 1.86 |
| ENSMUSG00000020107 | <i>D10Ert641e</i>   | 4.66 | 4.46 | 4.8  | 4.59 |
| ENSMUSG00000020108 | <i>Ddit4</i>        | 3.41 | 3    | 4.44 | 3.9  |
| ENSMUSG00000020109 | <i>Dnajb12</i>      | 4.93 | 5.33 | 5.2  | 5.14 |
| ENSMUSG00000020111 | <i>Cbar1</i>        | 4.6  | 4.76 | 4.46 | 4.28 |
| ENSMUSG00000020114 | <i>NA</i>           | 4.31 | 4.08 | 4.24 | 4.02 |
| ENSMUSG00000020115 | <i>Tbkl</i>         | 3.47 | 3.17 | 3.52 | 3.17 |
| ENSMUSG00000020116 | <i>Pnol</i>         | 4.99 | 4.65 | 4.78 | 4.36 |
| ENSMUSG00000020122 | <i>Egfr</i>         | 5.81 | 5.88 | 5.47 | 5.7  |
| ENSMUSG00000020123 | <i>Avpr1a</i>       | 5.14 | 5.28 | 4.2  | 4.16 |
| ENSMUSG00000020124 | <i>Usp15</i>        | 4.63 | 4.06 | 4.32 | 3.85 |
| ENSMUSG00000020128 | <i>Vps54</i>        | 4.29 | 3.54 | 3.9  | 3.41 |
| ENSMUSG00000020130 | <i>Tbc1d15</i>      | 4.69 | 3.79 | 4.31 | 3.87 |

|                    |                      |      |      |      |      |
|--------------------|----------------------|------|------|------|------|
| ENSMUSG00000020131 | <i>Pcsk4</i>         | 0.63 | 1.1  | 2.1  | 1.66 |
| ENSMUSG00000020132 | <i>Rab21</i>         | 5.14 | 3.78 | 4.62 | 4.04 |
| ENSMUSG00000020133 | <i>2310011J03Rik</i> | 3.02 | 3.72 | 3.55 | 3.47 |
| ENSMUSG00000020134 | <i>Pelil</i>         | 3.22 | 2.82 | 3.41 | 3.17 |
| ENSMUSG00000020137 | <i>Thap2</i>         | 2.47 | 1.25 | 2.31 | 2.27 |
| ENSMUSG00000020149 | <i>Rab1A</i>         | 6.48 | 5.98 | 6.29 | 5.86 |
| ENSMUSG00000020150 | <i>Gamt</i>          | 7.23 | 7.57 | 7.65 | 7.4  |
| ENSMUSG00000020152 | <i>Actr2</i>         | 5.62 | 4.19 | 4.88 | 4.39 |
| ENSMUSG00000020153 | <i>Ndufs7</i>        | 5.52 | 6.53 | 6.24 | 5.91 |
| ENSMUSG00000020154 | <i>Ptprb</i>         | 3.03 | 3.21 | 2.81 | 2.95 |
| ENSMUSG00000020156 | <i>Mum1</i>          | 0.77 | 1.52 | 1.01 | 0.91 |
| ENSMUSG00000020163 | <i>Uqcr</i>          | 5.28 | 5.21 | 6.04 | 6.37 |
| ENSMUSG00000020166 | <i>Cnot2</i>         | 3.96 | 3.68 | 3.82 | 3.26 |
| ENSMUSG00000020167 | <i>Tcfe2a</i>        | 2.13 | 2.99 | 2.72 | 2.24 |
| ENSMUSG00000020170 | <i>Frs2</i>          | 2.59 | 2.18 | 2.71 | 2.42 |
| ENSMUSG00000020171 | <i>Yeats4</i>        | 4.32 | 4.08 | 4.27 | 3.68 |
| ENSMUSG00000020173 | <i>Cobl</i>          | 2.11 | 1.82 | 2.64 | 2.23 |
| ENSMUSG00000020176 | <i>Grb10</i>         | 2.23 | 0.97 | 2.15 | 0.93 |
| ENSMUSG00000020180 | <i>Snrpd3</i>        | 5.07 | 5.31 | 5.32 | 5.44 |
| ENSMUSG00000020182 | <i>Ddc</i>           | 4.99 | 4.73 | 4.83 | 4.24 |
| ENSMUSG00000020183 | <i>NA</i>            | 1.16 | 0.92 | 1.58 | 1.4  |
| ENSMUSG00000020184 | <i>Mdm2</i>          | 3.47 | 3.25 | 3.3  | 3.2  |
| ENSMUSG00000020186 | <i>Csrp2</i>         | 4.22 | 4.12 | 4.43 | 4.44 |
| ENSMUSG00000020189 | <i>Osbpl8</i>        | 3.44 | 2.12 | 3.21 | 2.5  |
| ENSMUSG00000020190 | <i>Mknk2</i>         | 6.01 | 6.65 | 6.69 | 6.45 |
| ENSMUSG00000020196 | <i>Cabin1</i>        | 1.44 | 2.46 | 2.67 | 2.54 |
| ENSMUSG00000020198 | <i>Ap3d1</i>         | 4.27 | 4.87 | 4.64 | 4.43 |
| ENSMUSG00000020205 | <i>Phlda1</i>        | 5.56 | 5.83 | 5.03 | 5.03 |
| ENSMUSG00000020211 | <i>Sf3a2</i>         | 3.41 | 4.33 | 4.03 | 4.04 |
| ENSMUSG00000020219 | <i>Timm13</i>        | 5.73 | 6.45 | 6.31 | 6.22 |
| ENSMUSG00000020220 | <i>NA</i>            | 3.16 | 3.01 | 3.04 | 2.86 |

|                    |                     |      |      |      |       |
|--------------------|---------------------|------|------|------|-------|
| ENSMUSG00000020224 | <i>I190005P17Ri</i> | 1.99 | 1.64 | 1.64 | 0.89  |
| ENSMUSG00000020225 | <i>AK162942</i>     | 6.28 | 5.92 | 6.18 | 5.79  |
| ENSMUSG00000020228 | <i>helB</i>         | 1.84 | 1.55 | 1.4  | 1.2   |
| ENSMUSG00000020232 | <i>Hmg20b</i>       | 3.52 | 3.96 | 3.9  | 3.65  |
| ENSMUSG00000020234 | <i>4930404N11Ri</i> | 1.5  | 2.44 | 1.71 | 1.58  |
| ENSMUSG00000020235 | <i>Fzr1</i>         | 2.74 | 3.41 | 3.02 | 2.68  |
| ENSMUSG00000020236 | <i>Dohh</i>         | 3.4  | 4.34 | 3.97 | 3.93  |
| ENSMUSG00000020238 | <i>Ncln</i>         | 4.76 | 5.82 | 5.23 | 5.23  |
| ENSMUSG00000020246 | <i>Hcfc2</i>        | 2.51 | 2.15 | 2.01 | 1.79  |
| ENSMUSG00000020248 | <i>Nfyb</i>         | 2.88 | 2.21 | 2.53 | 2.46  |
| ENSMUSG00000020250 | <i>Txnrd1</i>       | 5.85 | 5.49 | 5.78 | 5.55  |
| ENSMUSG00000020253 | <i>Ppm1m</i>        | 1.79 | 1.95 | 1.89 | 1.43  |
| ENSMUSG00000020255 | <i>D10Wsu102e</i>   | 2.84 | 2.82 | 2.68 | 2.52  |
| ENSMUSG00000020257 | <i>Wdr82</i>        | 4.66 | 4.16 | 4.49 | 4.26  |
| ENSMUSG00000020258 | <i>6230410P16Ri</i> | 5.62 | 6.36 | 6.02 | 5.81  |
| ENSMUSG00000020260 | <i>Pofut2</i>       | 3.7  | 3.96 | 3.86 | 3.29  |
| ENSMUSG00000020261 | <i>Slc36a1</i>      | 3.09 | 3.58 | 3.46 | 3.28  |
| ENSMUSG00000020262 | <i>Adarb1</i>       | 2.07 | 1.92 | 2.43 | 2.03  |
| ENSMUSG00000020263 | <i>App12</i>        | 2.51 | 2.35 | 2.74 | 2.4   |
| ENSMUSG00000020265 | <i>Sumo3</i>        | 5.94 | 5.89 | 5.53 | 5.32  |
| ENSMUSG00000020267 | <i>Hint1</i>        | 7.03 | 6.7  | 6.55 | 6.34  |
| ENSMUSG00000020271 | <i>mKIAA0696</i>    | 3.98 | 3.87 | 3.75 | 3.6   |
| ENSMUSG00000020272 | <i>Stk10</i>        | 0.37 | 1.35 | 1.06 | -0.27 |
| ENSMUSG00000020273 | <i>Papolg</i>       | 1.18 | 0.65 | 1.12 | 0.38  |
| ENSMUSG00000020277 | <i>Pfkl</i>         | 4.08 | 4.97 | 4.28 | 4.38  |
| ENSMUSG00000020280 | <i>Ccdc139</i>      | 3.28 | 2.38 | 2.91 | 2.39  |
| ENSMUSG00000020283 | <i>Pex13</i>        | 5.62 | 4.79 | 5.35 | 5.04  |
| ENSMUSG00000020284 | <i>I810043G02Ri</i> | 1.3  | 1.98 | 2.33 | 1.69  |
| ENSMUSG00000020287 | <i>Mpg</i>          | 2.31 | 2.1  | 1.9  | 1.53  |
| ENSMUSG00000020288 | <i>Ahsa2</i>        | 4.79 | 4.29 | 4.32 | 4.28  |
| ENSMUSG00000020289 | <i>Mpg</i>          | 2.43 | 2.89 | 2.83 | 2.28  |

|                    |                     |      |      |      |      |
|--------------------|---------------------|------|------|------|------|
| ENSMUSG00000020290 | <i>Xpol</i>         | 3.18 | 1.93 | 2.93 | 1.7  |
| ENSMUSG00000020300 | <i>Cpeb4</i>        | 4.52 | 3.25 | 3.7  | 3.19 |
| ENSMUSG00000020305 | <i>Asb3</i>         | 1.27 | 0.89 | 1.28 | 0.88 |
| ENSMUSG00000020307 | <i>Cdc34</i>        | 4.62 | 5.29 | 4.73 | 4.88 |
| ENSMUSG00000020308 | <i>Gtrgeo22</i>     | 3.2  | 4.33 | 3.98 | 3.93 |
| ENSMUSG00000020309 | <i>2510006C20Ri</i> | 4.95 | 4.08 | 4.92 | 4.48 |
| ENSMUSG00000020311 | <i>4933407N01Ri</i> | 3.99 | 3.04 | 3.46 | 2.98 |
| ENSMUSG00000020315 | <i>Spnb2</i>        | 3.55 | 3.33 | 3.31 | 3.05 |
| ENSMUSG00000020321 | <i>Mdh1</i>         | 9.04 | 8.88 | 9.07 | 8.92 |
| ENSMUSG00000020326 | <i>Ccng1</i>        | 4.89 | 3.76 | 4.36 | 3.78 |
| ENSMUSG00000020328 | <i>Nudcd2</i>       | 4.38 | 4.02 | 4.07 | 3.63 |
| ENSMUSG00000020329 | <i>Polrmt</i>       | 2.98 | 3.72 | 3.28 | 3.27 |
| ENSMUSG00000020346 | <i>Mgat1</i>        | 4.7  | 5.32 | 4.71 | 4.56 |
| ENSMUSG00000020349 | <i>Ppp2ca</i>       | 6.63 | 6.72 | 6.7  | 6.33 |
| ENSMUSG00000020357 | <i>Flt4</i>         | 2.77 | 3.57 | 2.82 | 3.3  |
| ENSMUSG00000020358 | <i>Hnrpab</i>       | 6.22 | 6.05 | 5.9  | 5.77 |
| ENSMUSG00000020359 | <i>Agxt2l2</i>      | 3.53 | 3.16 | 3.32 | 3.04 |
| ENSMUSG00000020361 | <i>Hspa4</i>        | 5.85 | 5.71 | 5.67 | 5.36 |
| ENSMUSG00000020362 | <i>BC079836</i>     | 4.17 | 3.2  | 2.99 | 2.61 |
| ENSMUSG00000020366 | <i>Mapk9</i>        | 4.38 | 3.73 | 3.95 | 3.57 |
| ENSMUSG00000020368 | <i>Canx</i>         | 7.6  | 7.03 | 6.95 | 6.73 |
| ENSMUSG00000020372 | <i>Gnb2l1</i>       | 7.86 | 8.41 | 8.1  | 7.98 |
| ENSMUSG00000020375 | <i>Rufy1</i>        | 3.47 | 3.63 | 3.79 | 3.46 |
| ENSMUSG00000020376 | <i>Rnf130</i>       | 6.4  | 6    | 6.1  | 5.79 |
| ENSMUSG00000020380 | <i>Rad50</i>        | 1.74 | 1.23 | 1.29 | 0.67 |
| ENSMUSG00000020381 | <i>3010026O09Ri</i> | 2.55 | 2.8  | 2.58 | 2.66 |
| ENSMUSG00000020385 | <i>Clk4</i>         | 3.44 | 2.66 | 3.79 | 4    |
| ENSMUSG00000020386 | <i>Sar1b</i>        | 8.18 | 7.37 | 7.88 | 7.41 |
| ENSMUSG00000020387 | <i>Phf15</i>        | 2.23 | 2.91 | 1.99 | 1.09 |
| ENSMUSG00000020390 | <i>Ube2b</i>        | 6.89 | 5.59 | 6.44 | 5.93 |
| ENSMUSG00000020392 | <i>Cdkn2aipnl</i>   | 4    | 4.01 | 4.1  | 3.8  |

|                    |                     |      |      |      |      |
|--------------------|---------------------|------|------|------|------|
| ENSMUSG00000020393 | <i>Kremen1</i>      | 1.69 | 2.26 | 2.39 | 1.82 |
| ENSMUSG00000020397 | <i>Med7</i>         | 3.81 | 3.35 | 3.61 | 3.44 |
| ENSMUSG00000020400 | <i>Tnip1</i>        | 1.99 | 2.76 | 2.49 | 2.24 |
| ENSMUSG00000020402 | <i>Vdac1</i>        | 7.12 | 6.65 | 6.86 | 6.58 |
| ENSMUSG00000020409 | <i>Slu7</i>         | 3.79 | 3.35 | 3.46 | 3.15 |
| ENSMUSG00000020412 | <i>Ascc2</i>        | 3.37 | 3.74 | 3.62 | 3.73 |
| ENSMUSG00000020413 | <i>Hus1</i>         | 1.66 | 1.38 | 1.29 | 0.56 |
| ENSMUSG00000020422 | <i>Tns3</i>         | 2.4  | 2.91 | 2.8  | 2.63 |
| ENSMUSG00000020423 | <i>Btg2</i>         | 1.87 | 2.03 | 1.85 | 1.59 |
| ENSMUSG00000020427 | <i>Igfbp3</i>       | 5.3  | 5.14 | 5.21 | 4.72 |
| ENSMUSG00000020429 | <i>Igfbp1</i>       | 5.87 | 4.24 | 6.04 | 5.97 |
| ENSMUSG00000020430 | <i>Pes1</i>         | 2.54 | 3.07 | 2.41 | 2.47 |
| ENSMUSG00000020432 | <i>Tcn2</i>         | 7.25 | 7.5  | 7.56 | 7.26 |
| ENSMUSG00000020439 | <i>Smtn</i>         | 1.04 | 1.63 | 1.03 | 1.09 |
| ENSMUSG00000020440 | <i>Arf5</i>         | 5.21 | 6.15 | 5.61 | 5.31 |
| ENSMUSG00000020441 | <i>2310033P09Ri</i> | 2.44 | 2.79 | 2.45 | 2.33 |
| ENSMUSG00000020444 | <i>Guk1</i>         | 4    | 4.42 | 3.85 | 3.6  |
| ENSMUSG00000020448 | <i>Rnf185</i>       | 4.75 | 4.66 | 4.65 | 4.57 |
| ENSMUSG00000020451 | <i>Limk2</i>        | 0.89 | 0.8  | 1.17 | 0.9  |
| ENSMUSG00000020454 | <i>Eif4enif1</i>    | 3.09 | 3.45 | 3.34 | 3.21 |
| ENSMUSG00000020455 | <i>Trim11</i>       | 2.02 | 2.37 | 2.06 | 1.81 |
| ENSMUSG00000020456 | <i>Ogdh</i>         | 6.07 | 6.37 | 6.46 | 6.28 |
| ENSMUSG00000020457 | <i>Drg1</i>         | 5.44 | 5.19 | 5.49 | 5.19 |
| ENSMUSG00000020458 | <i>Rtn4</i>         | 5.49 | 3.82 | 4.51 | 3.8  |
| ENSMUSG00000020459 | <i>Mtif2</i>        | 3.95 | 3.44 | 3.86 | 3.33 |
| ENSMUSG00000020460 | <i>Rps27a</i>       | 0.84 | 1.71 | 1.25 | 0.6  |
| ENSMUSG00000020462 | <i>Ccdc104</i>      | 3.63 | 3.18 | 3.53 | 2.94 |
| ENSMUSG00000020463 | <i>Smek2</i>        | 4.42 | 3.57 | 3.94 | 3.37 |
| ENSMUSG00000020464 | <i>Pnpt1</i>        | 4.15 | 3.31 | 3.82 | 3.05 |
| ENSMUSG00000020467 | <i>Efemp1</i>       | 2.51 | 2.2  | 2.23 | 2.61 |
| ENSMUSG00000020471 | <i>Pold2</i>        | 2.17 | 3.13 | 2.51 | 2.48 |

|                    |                      |      |      |      |      |
|--------------------|----------------------|------|------|------|------|
| ENSMUSG00000020472 | <i>Zfp496</i>        | 3.37 | 3.7  | 3.6  | 3.47 |
| ENSMUSG00000020476 | <i>Dbnl</i>          | 3.7  | 4.48 | 3.88 | 3.86 |
| ENSMUSG00000020477 | <i>Mrps24</i>        | 5.71 | 5.86 | 5.54 | 5.56 |
| ENSMUSG00000020482 | <i>Ccdc117</i>       | 3.95 | 3.38 | 3.93 | 3.95 |
| ENSMUSG00000020483 | <i>Dynll2</i>        | 6.23 | 6.3  | 5.69 | 5.75 |
| ENSMUSG00000020484 | <i>Xbp1</i>          | 7.04 | 7.75 | 6.43 | 6.64 |
| ENSMUSG00000020485 | <i>Supt4h2</i>       | 2.94 | 1.84 | 2.84 | 2.51 |
| ENSMUSG00000020486 | <i>4-Sep</i>         | 0.98 | 1.82 | 1.55 | 1.3  |
| ENSMUSG00000020495 | <i>1200011M11Ri</i>  | 2.61 | 2.52 | 2.44 | 2.35 |
| ENSMUSG00000020496 | <i>NA</i>            | 5.69 | 6.46 | 5.63 | 5.59 |
| ENSMUSG00000020513 | <i>Tubd1</i>         | 0.67 | 0.88 | 1.17 | 0.97 |
| ENSMUSG00000020514 | <i>Mrpl22</i>        | 3.34 | 2.96 | 3.6  | 3.45 |
| ENSMUSG00000020515 | <i>Cnot8</i>         | 4.32 | 4.55 | 4.51 | 4.35 |
| ENSMUSG00000020516 | <i>RP23-467J12.2</i> | 2.54 | 2.21 | 2.36 | 1.95 |
| ENSMUSG00000020519 | <i>Sap30l</i>        | 3.4  | 4.36 | 3.77 | 3.42 |
| ENSMUSG00000020520 | <i>Galnt10</i>       | 1.49 | 1.6  | 1.49 | 1.29 |
| ENSMUSG00000020521 | <i>0610013E23Ri</i>  | 4.95 | 3.61 | 4.09 | 3.7  |
| ENSMUSG00000020522 | <i>Mfap3</i>         | 2.25 | 2.25 | 2.29 | 1.9  |
| ENSMUSG00000020523 | <i>1810073G14Ri</i>  | 4.6  | 4.28 | 4.52 | 4.08 |
| ENSMUSG00000020525 | <i>Ppm1d</i>         | 1.84 | 1.65 | 1.84 | 1.34 |
| ENSMUSG00000020526 | <i>Znhit3</i>        | 2.13 | 2.18 | 2.4  | 2.15 |
| ENSMUSG00000020527 | <i>NA</i>            | 1.38 | 1.58 | 1.79 | 1.21 |
| ENSMUSG00000020530 | <i>Ggnbp2</i>        | 5.53 | 4.45 | 5.05 | 4.43 |
| ENSMUSG00000020532 | <i>Acaca</i>         | 1.84 | 1.33 | 2.02 | 1.62 |
| ENSMUSG00000020534 | <i>Shmt1</i>         | 7.02 | 7.16 | 6.99 | 7    |
| ENSMUSG00000020536 | <i>Llg1l</i>         | 1.04 | 2    | 1.17 | 1.1  |
| ENSMUSG00000020537 | <i>Drg2</i>          | 4.23 | 4.85 | 4.48 | 4.56 |
| ENSMUSG00000020538 | <i>Srebfl</i>        | 5.08 | 6.31 | 5.49 | 5.73 |
| ENSMUSG00000020541 | <i>Tom1l1</i>        | 3.43 | 2.3  | 3.07 | 2.65 |
| ENSMUSG00000020544 | <i>Cox1l</i>         | 3.79 | 2.47 | 3.34 | 2.86 |
| ENSMUSG00000020547 | <i>Bzw2</i>          | 2.34 | 2.47 | 2.93 | 2.44 |



|                    |                 |      |       |      |      |
|--------------------|-----------------|------|-------|------|------|
| ENSMUSG00000020549 | <i>Elac2</i>    | 3.72 | 4.52  | 3.89 | 3.91 |
| ENSMUSG00000020553 | <i>Pctp</i>     | 6.75 | 6.34  | 6.09 | 5.73 |
| ENSMUSG00000020561 | <i>Twistnb</i>  | 2.73 | 2.1   | 2.13 | 1.72 |
| ENSMUSG00000020564 | <i>Atxn7l1</i>  | 1.93 | 1.84  | 1.39 | 1.35 |
| ENSMUSG00000020570 | <i>Sypl</i>     | 5.57 | 4.58  | 5.08 | 4.67 |
| ENSMUSG00000020571 | <i>Pdia6</i>    | 7.13 | 7.49  | 6.65 | 6.87 |
| ENSMUSG00000020572 | <i>Pbef1</i>    | 4.71 | 4.4   | 4.6  | 4.41 |
| ENSMUSG00000020576 | <i>NA</i>       | 2.93 | 3.14  | 2.89 | 2.7  |
| ENSMUSG00000020577 | <i>Tspan13</i>  | 1.06 | -0.84 | 1.04 | 0.32 |
| ENSMUSG00000020580 | <i>Rock2</i>    | 3.1  | 2.14  | 2.78 | 2.26 |
| ENSMUSG00000020585 | <i>Laptm4a</i>  | 7.17 | 6.66  | 6.83 | 6.45 |
| ENSMUSG00000020590 | <i>Snx13</i>    | 3.99 | 2.56  | 3.32 | 2.8  |
| ENSMUSG00000020592 | <i>Sdc1</i>     | 6.82 | 6.96  | 6.57 | 6.29 |
| ENSMUSG00000020593 | <i>Lpin1</i>    | 7.9  | 6.81  | 7.58 | 7.69 |
| ENSMUSG00000020594 | <i>Pum2</i>     | 4.55 | 3.78  | 4.19 | 3.73 |
| ENSMUSG00000020604 | <i>Arsg</i>     | 2.38 | 2.26  | 2.4  | 2.55 |
| ENSMUSG00000020605 | <i>Hslbp3</i>   | 2.5  | 3.01  | 2.88 | 2.55 |
| ENSMUSG00000020608 | <i>Smc6</i>     | 3.15 | 2.08  | 2.51 | 2.11 |
| ENSMUSG00000020609 | <i>Apob</i>     | 9.3  | 8.56  | 8.8  | 8.31 |
| ENSMUSG00000020610 | <i>X83328</i>   | 2.59 | 2.57  | 2.41 | 2.41 |
| ENSMUSG00000020611 | <i>Gna13</i>    | 3.1  | 2.72  | 2.95 | 2.76 |
| ENSMUSG00000020612 | <i>Prkar1a</i>  | 5.61 | 5.24  | 5.42 | 5.14 |
| ENSMUSG00000020614 | <i>BC029169</i> | 4.34 | 4.97  | 4.63 | 4.42 |
| ENSMUSG00000020620 | <i>Abca8b</i>   | 4.09 | 4.07  | 3.52 | 3.5  |
| ENSMUSG00000020621 | <i>Rdh14</i>    | 4.19 | 4.01  | 4.23 | 3.9  |
| ENSMUSG00000020623 | <i>Map2k6</i>   | 2.9  | 2.49  | 2.88 | 2.87 |
| ENSMUSG00000020628 | <i>Ttc15</i>    | 3.68 | 4.23  | 3.95 | 3.7  |
| ENSMUSG00000020629 | <i>Adi1</i>     | 7.1  | 6.63  | 6.86 | 6.42 |
| ENSMUSG00000020630 | <i>Rnaseh1</i>  | 1.5  | 1.63  | 1.56 | 1.55 |
| ENSMUSG00000020631 | <i>Atad2b</i>   | 2.94 | 1.88  | 2.47 | 1.93 |
| ENSMUSG00000020634 | <i>Ubx4</i>     | 4.22 | 3.43  | 3.73 | 3.32 |

|                    |               |      |      |      |      |
|--------------------|---------------|------|------|------|------|
| ENSMUSG00000020638 | <i>Tyki</i>   | 1.84 | 1.09 | 0.03 | 1.04 |
| ENSMUSG00000020640 | <i>Itsn2</i>  | 2.48 | 2.03 | 2.46 | 2.19 |
| ENSMUSG00000020641 | <i>Rsad2</i>  | 2.43 | 0.93 | 1.33 | 1.57 |
| ENSMUSG00000020644 | <i>Id2</i>    | 6.51 | 5.97 | 5.94 | 5.52 |
| ENSMUSG00000020647 | <i>Ncoal</i>  | 2.02 | 2.21 | 2.31 | 2.2  |
| ENSMUSG00000020648 | <i>Dus4l</i>  | 1.9  | 1.58 | 1.86 | 1.48 |
| ENSMUSG00000020649 | <i>Rrm2</i>   | 1.82 | 0.31 | 1.99 | 0.29 |
| ENSMUSG00000020650 | <i>Bcap29</i> | 3.08 | 1.54 | 2.47 | 1.33 |
| ENSMUSG00000020653 | <i>Klf11</i>  | 2.46 | 2.15 | 2.18 | 1.87 |
| ENSMUSG00000020659 | <i>Cbll1</i>  | 2.89 | 1.83 | 2.18 | 2.07 |
| ENSMUSG00000020661 | <i>Dnmt3a</i> | 1.11 | 1.27 | 1.24 | 1.19 |
| ENSMUSG00000020664 | <i>Dld</i>    | 6.87 | 5.68 | 6.3  | 5.58 |
| ENSMUSG00000020669 | <i>Sh3yl1</i> | 2.79 | 2.07 | 2.3  | 2.61 |
| ENSMUSG00000020671 | <i>Rab10</i>  | 5.57 | 5.24 | 5.45 | 5.12 |
| ENSMUSG00000020672 | <i>Sntg2</i>  | 3.77 | 3.37 | 3.03 | 2.78 |
| ENSMUSG00000020674 | <i>Pxdn</i>   | 1.48 | 1.21 | 0.67 | 0.85 |
| ENSMUSG00000020677 | <i>Ddx52</i>  | 3.81 | 2.82 | 3.22 | 2.44 |
| ENSMUSG00000020679 | <i>Hnf1b</i>  | 2.69 | 3.68 | 3.26 | 3.02 |
| ENSMUSG00000020680 | <i>Taf15</i>  | 5.14 | 4.82 | 4.73 | 4.33 |
| ENSMUSG00000020687 | <i>Cdc27</i>  | 2.94 | 2.08 | 2.66 | 1.95 |
| ENSMUSG00000020691 | <i>Mettl2</i> | 2.79 | 3.15 | 2.86 | 2.19 |
| ENSMUSG00000020692 | <i>Nle1</i>   | 0.8  | 2.27 | 1.53 | 1.65 |
| ENSMUSG00000020694 | <i>Tlk2</i>   | 3.08 | 2.32 | 2.86 | 2.45 |
| ENSMUSG00000020696 | <i>Rffl</i>   | 3.44 | 3.51 | 3.34 | 3.02 |
| ENSMUSG00000020697 | <i>Lig3</i>   | 3.09 | 3.03 | 2.9  | 2.71 |
| ENSMUSG00000020700 | <i>Map3k3</i> | 3.03 | 3.18 | 2.88 | 2.65 |
| ENSMUSG00000020705 | <i>Ddx42</i>  | 3.82 | 3.42 | 3.28 | 3.04 |
| ENSMUSG00000020706 | <i>Ftsj3</i>  | 3.93 | 4.43 | 3.88 | 3.88 |
| ENSMUSG00000020707 | <i>Rnf135</i> | 3.05 | 2.83 | 2.8  | 2.89 |
| ENSMUSG00000020708 | <i>Psmc5</i>  | 6.26 | 6.28 | 6.08 | 5.88 |
| ENSMUSG00000020709 | <i>Centa2</i> | 4.53 | 4.46 | 4.44 | 4.1  |

|                    |                     |      |      |      |      |
|--------------------|---------------------|------|------|------|------|
| ENSMUSG00000020715 | <i>Ernl</i>         | 3.54 | 3.67 | 3.61 | 3.75 |
| ENSMUSG00000020716 | <i>NF1</i>          | 2.26 | 1.87 | 2.25 | 1.63 |
| ENSMUSG00000020717 | <i>Pecam1</i>       | 3.56 | 3.46 | 3.22 | 3.32 |
| ENSMUSG00000020718 | <i>Polg2</i>        | 1.79 | 1.37 | 2.22 | 1.4  |
| ENSMUSG00000020719 | <i>Ddx5</i>         | 5.65 | 4.7  | 5.47 | 5.01 |
| ENSMUSG00000020720 | <i>Psm12</i>        | 6.02 | 5.89 | 5.58 | 5.49 |
| ENSMUSG00000020721 | <i>Helz</i>         | 1.2  | 1.43 | 1.36 | 0.94 |
| ENSMUSG00000020733 | <i>Slc9a3r1</i>     | 5.6  | 6.4  | 6.12 | 6.22 |
| ENSMUSG00000020736 | <i>Nt5c</i>         | 3.92 | 4.33 | 4.3  | 3.92 |
| ENSMUSG00000020737 | <i>Hn1</i>          | 2.89 | 3.44 | 2.82 | 2.53 |
| ENSMUSG00000020739 | <i>Nup85</i>        | 2.99 | 3.42 | 3.32 | 3.04 |
| ENSMUSG00000020740 | <i>mKIAA0154</i>    | 1.37 | 2.07 | 1.48 | 1.36 |
| ENSMUSG00000020741 | <i>I300001I01Ri</i> | 6.43 | 7.01 | 6.57 | 6.34 |
| ENSMUSG00000020743 | <i>Mif4gd</i>       | 4.65 | 5.45 | 5.13 | 4.81 |
| ENSMUSG00000020744 | <i>Slc25a19</i>     | 2.87 | 2.41 | 2.85 | 3.01 |
| ENSMUSG00000020745 | <i>Pafah1b1</i>     | 4.77 | 3.91 | 4.2  | 3.83 |
| ENSMUSG00000020747 | <i>2310067B10Ri</i> | 4.16 | 4.69 | 4.35 | 4.01 |
| ENSMUSG00000020752 | <i>Recq15</i>       | 1.52 | 2.26 | 2.13 | 1.83 |
| ENSMUSG00000020755 | <i>Sap30bp</i>      | 3.48 | 4.22 | 3.7  | 3.63 |
| ENSMUSG00000020766 | <i>Galk1</i>        | 4.49 | 5.31 | 4.56 | 4.7  |
| ENSMUSG00000020770 | <i>Unk</i>          | 1.46 | 1.69 | 1.68 | 1.23 |
| ENSMUSG00000020773 | <i>Trim47</i>       | 1.08 | 1.39 | 0.94 | 0.78 |
| ENSMUSG00000020774 | <i>Aspa</i>         | 3.53 | 2.14 | 3.29 | 2.06 |
| ENSMUSG00000020775 | <i>Mrpl38</i>       | 5.64 | 6.37 | 6.11 | 5.95 |
| ENSMUSG00000020777 | <i>muspaox</i>      | 9.2  | 8.89 | 9.09 | 8.88 |
| ENSMUSG00000020780 | <i>Srp68</i>        | 4.7  | 5.49 | 4.72 | 4.84 |
| ENSMUSG00000020781 | <i>Tsen54</i>       | 2.08 | 2.86 | 2.33 | 2.18 |
| ENSMUSG00000020782 | <i>Llgl2</i>        | 3.29 | 4.24 | 3.22 | 3.16 |
| ENSMUSG00000020783 | <i>I200014J11Ri</i> | 3.2  | 2.75 | 2.51 | 2.53 |
| ENSMUSG00000020790 | <i>Ankhzn</i>       | 2.85 | 2.83 | 2.72 | 2.7  |
| ENSMUSG00000020792 | <i>Exoc7</i>        | 3.75 | 4.34 | 3.87 | 4.02 |

|                    |                     |      |      |      |      |
|--------------------|---------------------|------|------|------|------|
| ENSMUSG00000020794 | <i>Ube2g1</i>       | 4.98 | 3.84 | 4.77 | 4.1  |
| ENSMUSG00000020801 | <i>Med31</i>        | 2.89 | 2.13 | 2.99 | 2.4  |
| ENSMUSG00000020802 | <i>mKIAA1734</i>    | 1.51 | 2.62 | 1.88 | 1.85 |
| ENSMUSG00000020803 | <i>Txndc17</i>      | 5.84 | 6.05 | 6.1  | 5.82 |
| ENSMUSG00000020806 | <i>Rhbdf2</i>       | 2.05 | 3.09 | 2.12 | 1.85 |
| ENSMUSG00000020810 | <i>Cygb</i>         | 1.93 | 2.37 | 2.12 | 1.87 |
| ENSMUSG00000020815 | <i>III0005A03Ri</i> | 2.44 | 2.53 | 2.38 | 1.98 |
| ENSMUSG00000020817 | <i>Rabep1</i>       | 4.3  | 3.55 | 3.97 | 3.34 |
| ENSMUSG00000020818 | <i>AK007898</i>     | 2.73 | 2.98 | 2.64 | 2.2  |
| ENSMUSG00000020821 | <i>Kiflc</i>        | 5.73 | 6.24 | 5.64 | 5.67 |
| ENSMUSG00000020823 | <i>Sec14l1</i>      | 2.37 | 2.42 | 2.19 | 2.19 |
| ENSMUSG00000020827 | <i>MINK</i>         | 3.67 | 4.45 | 4.08 | 4.11 |
| ENSMUSG00000020829 | <i>Slc46a1</i>      | 5.09 | 6.03 | 5.64 | 5.6  |
| ENSMUSG00000020830 | <i>Vmo1</i>         | 1.82 | 2.36 | 1.91 | 2.07 |
| ENSMUSG00000020831 | <i>D11Bwg0434e</i>  | 3.19 | 3.87 | 3.46 | 3.37 |
| ENSMUSG00000020832 | <i>Eral1</i>        | 3.6  | 4.32 | 4.23 | 4.04 |
| ENSMUSG00000020834 | <i>Dhrs13</i>       | 1.73 | 1.99 | 1.76 | 1.72 |
| ENSMUSG00000020840 | <i>Blmh</i>         | 4.55 | 4.31 | 4.73 | 4.33 |
| ENSMUSG00000020841 | <i>Cpd</i>          | 2.39 | 2.13 | 2.43 | 2.16 |
| ENSMUSG00000020843 | <i>Timm22</i>       | 3.17 | 2.91 | 3.31 | 3.08 |
| ENSMUSG00000020849 | <i>Ywhae</i>        | 7.84 | 7.24 | 7.7  | 7.38 |
| ENSMUSG00000020850 | <i>Prpf8</i>        | 5.4  | 5.78 | 5.46 | 5.32 |
| ENSMUSG00000020857 | <i>Nme2</i>         | 4.37 | 4.63 | 4.81 | 4.86 |
| ENSMUSG00000020859 | <i>BC096410</i>     | 4.31 | 3.52 | 3.86 | 3.41 |
| ENSMUSG00000020863 | <i>3300001P08Ri</i> | 4.21 | 3.07 | 3.85 | 3.21 |
| ENSMUSG00000020864 | <i>Ankrd40</i>      | 4.33 | 4.18 | 4.42 | 4.1  |
| ENSMUSG00000020865 | <i>Abcc3</i>        | 6.32 | 7.05 | 6.6  | 6.66 |
| ENSMUSG00000020868 | <i>Xylt2</i>        | 2.71 | 3.67 | 3.04 | 3.19 |
| ENSMUSG00000020869 | <i>Lrrc59</i>       | 6.04 | 5.92 | 5.31 | 5.16 |
| ENSMUSG00000020873 | <i>Slc35b1</i>      | 5.32 | 5.69 | 4.75 | 4.85 |
| ENSMUSG00000020876 | <i>Snx11</i>        | 1.4  | 2.1  | 1.86 | 1.28 |

|                    |                     |       |       |      |       |
|--------------------|---------------------|-------|-------|------|-------|
| ENSMUSG00000020877 | <i>Scrn2</i>        | 4.4   | 5.21  | 4.87 | 4.51  |
| ENSMUSG00000020883 | <i>Fbxl20</i>       | 2.97  | 2.58  | 3.07 | 2.54  |
| ENSMUSG00000020884 | <i>Asgr1</i>        | 8.5   | 8.43  | 8.52 | 8.41  |
| ENSMUSG00000020888 | <i>Dvl2</i>         | 5.79  | 5.96  | 5.87 | 5.55  |
| ENSMUSG00000020889 | <i>Nr1dl</i>        | 5.18  | 5.71  | 5.94 | 6.09  |
| ENSMUSG00000020893 | <i>Perl</i>         | 2.4   | 3.18  | 3.53 | 3.59  |
| ENSMUSG00000020894 | <i>Vamp2</i>        | 2.78  | 2.8   | 3.18 | 3.04  |
| ENSMUSG00000020898 | <i>1500010J02Ri</i> | 0.98  | 1.47  | 1.84 | 1.2   |
| ENSMUSG00000020899 | <i>NA</i>           | 1.13  | 1.24  | 1.72 | 0.89  |
| ENSMUSG00000020902 | <i>Ntn1</i>         | 1.8   | 2.22  | 1.37 | 1.6   |
| ENSMUSG00000020903 | <i>Stx8</i>         | 1.4   | 1.77  | 1.73 | 1.57  |
| ENSMUSG00000020910 | <i>2310004I24Ri</i> | 4.16  | 3.01  | 3.94 | 3.51  |
| ENSMUSG00000020917 | <i>Acly</i>         | 6.22  | 5.81  | 6.04 | 5.8   |
| ENSMUSG00000020918 | <i>Gcn5l2</i>       | 3.02  | 3.89  | 3.21 | 3.11  |
| ENSMUSG00000020919 | <i>Stat5b</i>       | 4.21  | 4.24  | 4.31 | 3.79  |
| ENSMUSG00000020921 | <i>Tmem101</i>      | 2.08  | 2.51  | 2.29 | 1.99  |
| ENSMUSG00000020922 | <i>Lsm12</i>        | 4.53  | 4.1   | 4.48 | 4.13  |
| ENSMUSG00000020923 | <i>Ubf</i>          | 3.79  | 4.48  | 4.05 | 3.77  |
| ENSMUSG00000020925 | <i>Ccdc43</i>       | 2.92  | 2.37  | 2.62 | 2.23  |
| ENSMUSG00000020926 | <i>Adam11</i>       | 1.56  | 2.46  | 1.73 | 1.55  |
| ENSMUSG00000020929 | <i>Eftud2</i>       | 3.25  | 3.82  | 3.52 | 3.4   |
| ENSMUSG00000020935 | <i>Dcakd</i>        | 3.82  | 4.56  | 4.18 | 4.16  |
| ENSMUSG00000020936 | <i>Nmt1</i>         | 5.48  | 5.75  | 5.45 | 5.31  |
| ENSMUSG00000020946 | <i>Gosr2</i>        | 5.1   | 4.95  | 4.67 | 4.49  |
| ENSMUSG00000020949 | <i>Fkbp3</i>        | 5.1   | 3.61  | 4.3  | 3.75  |
| ENSMUSG00000020952 | <i>Scfd1</i>        | 4.72  | 4.03  | 3.99 | 3.46  |
| ENSMUSG00000020953 | <i>Coch</i>         | -4.62 | -3.62 | 1.09 | -4.62 |
| ENSMUSG00000020954 | <i>Strn3</i>        | 3.83  | 3.44  | 3.5  | 3.25  |
| ENSMUSG00000020955 | <i>Ap4s1</i>        | 3.31  | 2.62  | 3.21 | 2.49  |
| ENSMUSG00000020956 | <i>6530401N04Ri</i> | 3.11  | 3.03  | 3.24 | 3.03  |
| ENSMUSG00000020962 | <i>Gtf2a1</i>       | 2.87  | 1.95  | 2.65 | 2.13  |

|                    |                     |      |      |      |      |
|--------------------|---------------------|------|------|------|------|
| ENSMUSG00000020964 | <i>Sell1</i>        | 5.48 | 5.63 | 5.14 | 4.96 |
| ENSMUSG00000020973 | <i>I110034A24Ri</i> | 0.61 | 1.24 | 1.42 | 0.87 |
| ENSMUSG00000020978 | <i>Klhdc2</i>       | 4.95 | 4.37 | 4.87 | 4.37 |
| ENSMUSG00000020982 | <i>Sdccag1</i>      | 3.25 | 2.64 | 2.8  | 2.43 |
| ENSMUSG00000020986 | <i>Sec23a</i>       | 5.57 | 4.78 | 5.48 | 5.1  |
| ENSMUSG00000020988 | <i>L2hgdh</i>       | 3.33 | 2.63 | 3.15 | 2.88 |
| ENSMUSG00000020993 | <i>Trappc6b</i>     | 3.85 | 3.02 | 3.85 | 3.1  |
| ENSMUSG00000020994 | <i>Pnn</i>          | 3.33 | 3.01 | 3.21 | 2.75 |
| ENSMUSG00000021000 | <i>Ctage5</i>       | 7.39 | 6.79 | 7.61 | 7.11 |
| ENSMUSG00000021003 | <i>Galc</i>         | 1.08 | 1.21 | 1.36 | 0.67 |
| ENSMUSG00000021009 | <i>Ptpn21</i>       | 2.07 | 1.89 | 2.35 | 2.17 |
| ENSMUSG00000021012 | <i>Zc3h14</i>       | 4.13 | 3.54 | 4.05 | 3.69 |
| ENSMUSG00000021013 | <i>Ttc8</i>         | 1.14 | 0.79 | 1.09 | 0.54 |
| ENSMUSG00000021018 | <i>Polr2h</i>       | 1.65 | 2.16 | 1.96 | 2.06 |
| ENSMUSG00000021022 | <i>Ppp2r3c</i>      | 2.67 | 2.05 | 2.75 | 2.01 |
| ENSMUSG00000021023 | <i>NA</i>           | 2.85 | 2.61 | 2.93 | 2.65 |
| ENSMUSG00000021024 | <i>Psma6</i>        | 6.95 | 6.6  | 6.95 | 6.76 |
| ENSMUSG00000021025 | <i>Nfkbia</i>       | 5.5  | 5.66 | 5.89 | 5.58 |
| ENSMUSG00000021027 | <i>Garnl1</i>       | 1.06 | 0.8  | 1.01 | 0.27 |
| ENSMUSG00000021028 | <i>Mbip</i>         | 1.09 | 0.53 | 1.24 | 0.27 |
| ENSMUSG00000021033 | <i>Gstz1</i>        | 9.35 | 9.05 | 9.18 | 8.96 |
| ENSMUSG00000021036 | <i>Sptlc2</i>       | 3.49 | 3.13 | 3.29 | 3.09 |
| ENSMUSG00000021037 | <i>Ahsa1</i>        | 6.75 | 6.7  | 6.56 | 6.61 |
| ENSMUSG00000021038 | <i>A1413782</i>     | 3.17 | 2.91 | 3.36 | 2.65 |
| ENSMUSG00000021039 | <i>Snw1</i>         | 4.73 | 4.2  | 4.34 | 4.03 |
| ENSMUSG00000021040 | <i>I810035L17Ri</i> | 5.82 | 4.97 | 5.93 | 5.69 |
| ENSMUSG00000021044 | <i>Adck1</i>        | 2.86 | 3.36 | 3.27 | 2.89 |
| ENSMUSG00000021048 | <i>Mthfd1</i>       | 6.46 | 6.81 | 6.66 | 6.41 |
| ENSMUSG00000021051 | <i>Ppp2r5e</i>      | 4.95 | 4.63 | 4.65 | 4.46 |
| ENSMUSG00000021054 | <i>Sgpp1</i>        | 5.13 | 4.6  | 4.75 | 4.58 |
| ENSMUSG00000021065 | <i>Fut8</i>         | 1.95 | 1.1  | 1.59 | 1.07 |

|                    |                     |      |      |      |      |
|--------------------|---------------------|------|------|------|------|
| ENSMUSG00000021067 | <i>Savl</i>         | 3.33 | 3.07 | 3.18 | 2.72 |
| ENSMUSG00000021069 | <i>Pygl</i>         | 7.44 | 7.14 | 7.48 | 7.05 |
| ENSMUSG00000021072 | <i>Txndcl</i>       | 5.12 | 3.85 | 4.47 | 3.98 |
| ENSMUSG00000021076 | <i>Actr10</i>       | 5.18 | 4.87 | 4.82 | 4.56 |
| ENSMUSG00000021079 | <i>Timm9</i>        | 4.32 | 4.73 | 5.14 | 4.85 |
| ENSMUSG00000021091 | <i>Serpina3n</i>    | 8.37 | 8.69 | 8.66 | 8.59 |
| ENSMUSG00000021094 | <i>Dhrs7</i>        | 5.84 | 5.66 | 5.72 | 5.58 |
| ENSMUSG00000021096 | <i>Ppm1a</i>        | 6.05 | 6.1  | 5.94 | 5.68 |
| ENSMUSG00000021097 | <i>Clmn</i>         | 4.55 | 4.12 | 4.75 | 4.47 |
| ENSMUSG00000021102 | <i>Glr5</i>         | 5.83 | 6.17 | 6.29 | 5.91 |
| ENSMUSG00000021103 | <i>Mnat1</i>        | 2.4  | 2.26 | 2.43 | 2.27 |
| ENSMUSG00000021109 | <i>Hif1a</i>        | 3.89 | 2.94 | 3.56 | 2.83 |
| ENSMUSG00000021111 | <i>Papola</i>       | 3.64 | 3.14 | 3.39 | 3.03 |
| ENSMUSG00000021112 | <i>Pals1</i>        | 2.9  | 1.37 | 2.33 | 1.56 |
| ENSMUSG00000021113 | <i>Snapc1</i>       | 1.62 | 0.39 | 1.04 | 0.34 |
| ENSMUSG00000021114 | <i>Atp6v1d</i>      | 4.98 | 4.85 | 5.34 | 4.86 |
| ENSMUSG00000021115 | <i>Vrk1</i>         | 1.74 | 1.21 | 1.71 | 0.85 |
| ENSMUSG00000021116 | <i>Eif2s1</i>       | 3.69 | 3.09 | 3.6  | 3.68 |
| ENSMUSG00000021120 | <i>Pigh</i>         | 2.85 | 2.12 | 2.23 | 1.77 |
| ENSMUSG00000021124 | <i>Vti1b</i>        | 5.39 | 4.26 | 4.68 | 4.41 |
| ENSMUSG00000021127 | <i>Zfp361l</i>      | 6.17 | 5.6  | 5.85 | 5.73 |
| ENSMUSG00000021133 | <i>4933426M11Rd</i> | 5.17 | 4.93 | 5.09 | 4.94 |
| ENSMUSG00000021134 | <i>Sfrs5</i>        | 4.55 | 4.09 | 4.8  | 4.5  |
| ENSMUSG00000021135 | <i>Slc10a1</i>      | 9.13 | 9.09 | 9.27 | 8.89 |
| ENSMUSG00000021136 | <i>Smoc1</i>        | 6.61 | 6.56 | 6.76 | 6.52 |
| ENSMUSG00000021139 | <i>Arip2</i>        | 4.12 | 3.8  | 4.05 | 3.66 |
| ENSMUSG00000021140 | <i>Pcnx</i>         | 2.72 | 2.67 | 2.67 | 2.28 |
| ENSMUSG00000021143 | <i>Pacs2</i>        | 2.16 | 2.6  | 2.76 | 2.24 |
| ENSMUSG00000021144 | <i>Mtal</i>         | 3.96 | 4.23 | 4.24 | 4.15 |
| ENSMUSG00000021147 | <i>Wdr37</i>        | 1.89 | 1.25 | 1.35 | 0.89 |
| ENSMUSG00000021149 | <i>Gtppb4</i>       | 4.28 | 3.72 | 4.02 | 3.72 |

|                    |                     |      |      |      |      |
|--------------------|---------------------|------|------|------|------|
| ENSMUSG00000021156 | <i>Zmynd11</i>      | 4.1  | 3.59 | 3.92 | 3.72 |
| ENSMUSG00000021171 | <i>D12Ert551e</i>   | 3.1  | 2.77 | 2.9  | 2.69 |
| ENSMUSG00000021177 | <i>Tdpl</i>         | 1.02 | 1.38 | 1.21 | 1.17 |
| ENSMUSG00000021178 | <i>Psmc1</i>        | 5.28 | 5.31 | 5.18 | 5.15 |
| ENSMUSG00000021179 | <i>NA</i>           | 1.81 | 2.18 | 2.1  | 1.34 |
| ENSMUSG00000021185 | <i>9030617O03Ri</i> | 3.51 | 3.28 | 3.85 | 3.56 |
| ENSMUSG00000021186 | <i>Fbln5</i>        | 2.14 | 2.07 | 1.99 | 1.75 |
| ENSMUSG00000021188 | <i>NA</i>           | 2.65 | 1.96 | 2.1  | 1.69 |
| ENSMUSG00000021189 | <i>Atxn3</i>        | 2.82 | 2.1  | 2.51 | 1.81 |
| ENSMUSG00000021190 | <i>Lgmn</i>         | 5.15 | 5.24 | 4.9  | 4.91 |
| ENSMUSG00000021192 | <i>Golga5</i>       | 3.63 | 3.5  | 3.52 | 3.22 |
| ENSMUSG00000021193 | <i>Pitrm1</i>       | 4.5  | 4.25 | 4.49 | 3.94 |
| ENSMUSG00000021208 | <i>1810023F06Ri</i> | 1.45 | 1.9  | 2.28 | 1.36 |
| ENSMUSG00000021209 | <i>8430415E04Ri</i> | 2.66 | 1.23 | 2.27 | 1.77 |
| ENSMUSG00000021210 | <i>Akr1c6</i>       | 9.68 | 9.38 | 9.26 | 9    |
| ENSMUSG00000021211 | <i>Akr1c12</i>      | 5.36 | 4.99 | 5.29 | 4.94 |
| ENSMUSG00000021213 | <i>Akr1c13</i>      | 6.15 | 5.47 | 5.88 | 5.73 |
| ENSMUSG00000021215 | <i>Net1</i>         | 4.89 | 4.47 | 4.55 | 3.75 |
| ENSMUSG00000021218 | <i>Gdi2</i>         | 6.82 | 6.43 | 6.72 | 6.23 |
| ENSMUSG00000021222 | <i>Wdr21</i>        | 1.4  | 1.46 | 1.91 | 1.22 |
| ENSMUSG00000021224 | <i>Numb</i>         | 3.71 | 3.8  | 3.84 | 3.62 |
| ENSMUSG00000021226 | <i>Acot2</i>        | 3.33 | 2.54 | 3.1  | 2.37 |
| ENSMUSG00000021228 | <i>Acot3</i>        | 4.51 | 3.98 | 3.93 | 3.68 |
| ENSMUSG00000021235 | <i>Coq6</i>         | 3.17 | 3.6  | 3.35 | 3.14 |
| ENSMUSG00000021236 | <i>Entpd5</i>       | 6.5  | 5.85 | 6.2  | 5.67 |
| ENSMUSG00000021238 | <i>Aldh6a1</i>      | 8.6  | 7.85 | 8.21 | 7.77 |
| ENSMUSG00000021240 | <i>Abcd4</i>        | 3.27 | 3.64 | 4.01 | 3.43 |
| ENSMUSG00000021241 | <i>NA</i>           | 4.37 | 4.45 | 4.56 | 4.26 |
| ENSMUSG00000021242 | <i>Npc2</i>         | 6.53 | 6.56 | 6.25 | 6.57 |
| ENSMUSG00000021243 | <i>Fcfl</i>         | 1.59 | 1.21 | 1.23 | 1.65 |
| ENSMUSG00000021244 | <i>zap</i>          | 2.36 | 2.31 | 2.27 | 2.07 |



|                    |                     |      |      |      |      |
|--------------------|---------------------|------|------|------|------|
| ENSMUSG00000021245 | <i>Mlh3</i>         | 1.85 | 1.61 | 1.93 | 1.27 |
| ENSMUSG00000021248 | <i>Tmed10</i>       | 4.92 | 5.03 | 4.86 | 4.57 |
| ENSMUSG00000021252 | <i>0610007P14Ri</i> | 6.36 | 5.64 | 5.98 | 5.5  |
| ENSMUSG00000021254 | <i>1700020O03Ri</i> | 2.21 | 2.26 | 2.18 | 1.83 |
| ENSMUSG00000021257 | <i>Angell</i>       | 1.69 | 2.5  | 1.75 | 1.37 |
| ENSMUSG00000021258 | <i>Ccnk</i>         | 3.71 | 3.77 | 3.79 | 3.83 |
| ENSMUSG00000021264 | <i>Yyl</i>          | 5.31 | 4.15 | 4.79 | 4.46 |
| ENSMUSG00000021265 | <i>Slc25a29</i>     | 0.59 | 1.97 | 1.21 | 0.89 |
| ENSMUSG00000021266 | <i>Wars</i>         | 3.01 | 3.67 | 3.2  | 3.11 |
| ENSMUSG00000021270 | <i>Hsp90aa1</i>     | 4.46 | 4.27 | 3.77 | 4.08 |
| ENSMUSG00000021271 | <i>NA</i>           | 1.34 | 1.74 | 0.82 | 0.29 |
| ENSMUSG00000021273 | <i>Fdft1</i>        | 3.7  | 3.79 | 3.07 | 3.22 |
| ENSMUSG00000021275 | <i>mKIAA0297</i>    | 1.46 | 1.26 | 1.01 | 0.63 |
| ENSMUSG00000021276 | <i>2810452K22Ri</i> | 3.15 | 3.08 | 3.12 | 3.05 |
| ENSMUSG00000021277 | <i>Traf3</i>        | 1.7  | 1.8  | 1.4  | 1.49 |
| ENSMUSG00000021279 | <i>mKIAA1124</i>    | 3.96 | 4.3  | 4.34 | 4    |
| ENSMUSG00000021281 | <i>Tnfaip2</i>      | 2.41 | 3.77 | 2.19 | 1.83 |
| ENSMUSG00000021282 | <i>Eif5</i>         | 6.49 | 6.24 | 6.46 | 5.92 |
| ENSMUSG00000021285 | <i>Ppp1r13b</i>     | 2.26 | 2.78 | 2.27 | 2.26 |
| ENSMUSG00000021286 | <i>Zfyve21</i>      | 4.66 | 4.95 | 5.01 | 4.43 |
| ENSMUSG00000021288 | <i>Klc1</i>         | 1.63 | 2.41 | 2    | 1.93 |
| ENSMUSG00000021290 | <i>2010107E04Ri</i> | 7.41 | 5.79 | 7.17 | 6.84 |
| ENSMUSG00000021302 | <i>Ggps1</i>        | 1.59 | 0.65 | 0.96 | 0.59 |
| ENSMUSG00000021326 | <i>Trim27</i>       | 3.5  | 4.01 | 3.84 | 3.46 |
| ENSMUSG00000021327 | <i>Zkscan3</i>      | 2.82 | 2.35 | 2.57 | 2.23 |
| ENSMUSG00000021335 | <i>Slc17a1</i>      | 3.91 | 3.43 | 3.78 | 3.15 |
| ENSMUSG00000021336 | <i>Slc17a4</i>      | 5.8  | 5.48 | 5.69 | 5.37 |
| ENSMUSG00000021338 | <i>Lrrc16</i>       | 1.26 | 1.32 | 1.04 | 1.32 |
| ENSMUSG00000021339 | <i>Mrs2l</i>        | 2.38 | 2.35 | 2.94 | 2    |
| ENSMUSG00000021340 | <i>Gpld1</i>        | 6.75 | 6.98 | 6.84 | 6.76 |
| ENSMUSG00000021357 | <i>Exoc2</i>        | 1.71 | 1.38 | 1.91 | 1.11 |

|                    |                      |      |      |      |       |
|--------------------|----------------------|------|------|------|-------|
| ENSMUSG00000021360 | <i>Gcnt2</i>         | 2.42 | 2.22 | 2.57 | 2.55  |
| ENSMUSG00000021361 | <i>Tmem14c</i>       | 6.74 | 6.34 | 6.54 | 6.42  |
| ENSMUSG00000021364 | <i>Elovl2</i>        | 8.06 | 7.8  | 7.54 | 7.5   |
| ENSMUSG00000021365 | <i>Nedd9</i>         | 1.43 | 1.1  | 0.95 | 0.61  |
| ENSMUSG00000021366 | <i>Hivep1</i>        | 2.15 | 1.64 | 1.78 | 1.78  |
| ENSMUSG00000021368 | <i>Tbc1d7</i>        | 3.26 | 3.35 | 3.49 | 3.02  |
| ENSMUSG00000021371 | <i>Ccdc90a</i>       | 4.28 | 3.42 | 3.97 | 3.58  |
| ENSMUSG00000021374 | <i>Nup153</i>        | 3.35 | 2.96 | 3.15 | 3.07  |
| ENSMUSG00000021375 | <i>Kif13a</i>        | 1.55 | 2.14 | 2.04 | 1.91  |
| ENSMUSG00000021376 | <i>Tpmt</i>          | 6.47 | 3.75 | 6.24 | 5.03  |
| ENSMUSG00000021377 | <i>Dek</i>           | 4.85 | 3.82 | 4.43 | 3.69  |
| ENSMUSG00000021385 | <i>Ippk</i>          | 2.49 | 2.4  | 2.23 | 2.29  |
| ENSMUSG00000021392 | <i>Nol8</i>          | 2.93 | 2.16 | 2.59 | 2.25  |
| ENSMUSG00000021395 | <i>Spin1</i>         | 4.45 | 3.94 | 4.08 | 3.8   |
| ENSMUSG00000021400 | <i>Wrnip1</i>        | 4.45 | 4.72 | 4.42 | 4.21  |
| ENSMUSG00000021408 | <i>Ripk1</i>         | 4.16 | 3.88 | 3.84 | 3.47  |
| ENSMUSG00000021411 | <i>1300014I06Rik</i> | 5.14 | 5.43 | 5.24 | 5     |
| ENSMUSG00000021413 | <i>Prpf4b</i>        | 3.77 | 2.93 | 3.4  | 2.87  |
| ENSMUSG00000021415 | <i>4933417A18Rik</i> | 1.32 | -0.5 | 1.07 | -1.25 |
| ENSMUSG00000021416 | <i>1810022C23Rik</i> | 3.86 | 2.08 | 3.55 | 1.58  |
| ENSMUSG00000021417 | <i>Peci</i>          | 7.33 | 7.15 | 7.35 | 7.12  |
| ENSMUSG00000021418 | <i>Rpp40</i>         | 2.56 | 2.46 | 2.58 | 2.19  |
| ENSMUSG00000021420 | <i>Fars2</i>         | 4.26 | 4.2  | 4.28 | 4.22  |
| ENSMUSG00000021423 | <i>Ly86</i>          | 2.49 | 1.65 | 2.4  | 1.89  |
| ENSMUSG00000021427 | <i>Ssr1</i>          | 6.41 | 5.2  | 5.64 | 5.13  |
| ENSMUSG00000021428 | <i>Riok1</i>         | 2.39 | 1.45 | 1.7  | 1.19  |
| ENSMUSG00000021431 | <i>6530403A03Rik</i> | 4.67 | 3.69 | 4.49 | 4.11  |
| ENSMUSG00000021432 | <i>Slc35b3</i>       | 2.16 | 1.67 | 1.94 | 1.2   |
| ENSMUSG00000021453 | <i>Gadd45g</i>       | 3.65 | 5.06 | 3.63 | 3.93  |
| ENSMUSG00000021457 | <i>Syk</i>           | 0.43 | 0.46 | 1.3  | -0.12 |
| ENSMUSG00000021458 | <i>2010111I01Rik</i> | 1.43 | 1.91 | 2.05 | 1.82  |

|                    |                      |      |      |      |      |
|--------------------|----------------------|------|------|------|------|
| ENSMUSG00000021460 | <i>Auh</i>           | 3.24 | 3.33 | 3.16 | 2.68 |
| ENSMUSG00000021466 | <i>Ptch1</i>         | 2.88 | 3.29 | 3.06 | 2.91 |
| ENSMUSG00000021468 | <i>Sptlc1</i>        | 3.97 | 4.05 | 3.93 | 3.68 |
| ENSMUSG00000021470 | <i>0610007P08Ri</i>  | 2.26 | 1.68 | 2.23 | 1.83 |
| ENSMUSG00000021474 | <i>Sfxn1</i>         | 6.17 | 5.96 | 6.62 | 6.02 |
| ENSMUSG00000021476 | <i>Habp4</i>         | 4.07 | 4.08 | 4.36 | 4.38 |
| ENSMUSG00000021477 | <i>Ctsl</i>          | 8.99 | 8.67 | 9.08 | 8.61 |
| ENSMUSG00000021481 | <i>Zfp346</i>        | 1.19 | 1.6  | 0.9  | 0.23 |
| ENSMUSG00000021482 | <i>1110018J18Rik</i> | 6.19 | 5.92 | 5.85 | 5.61 |
| ENSMUSG00000021483 | <i>Ccrk</i>          | 2.01 | 2.47 | 1.99 | 2.06 |
| ENSMUSG00000021484 | <i>Lman2</i>         | 6.46 | 7.31 | 6.63 | 6.44 |
| ENSMUSG00000021485 | <i>Mxd3</i>          | 1.3  | 1.7  | 1.01 | 1.23 |
| ENSMUSG00000021486 | <i>Preli1</i>        | 5.03 | 5.79 | 5.54 | 5.12 |
| ENSMUSG00000021488 | <i>Nsd1</i>          | 3.27 | 2.88 | 3.18 | 3.02 |
| ENSMUSG00000021492 | <i>F12</i>           | 7.33 | 7.98 | 7.63 | 7.86 |
| ENSMUSG00000021493 | <i>Pdlim7</i>        | 1.26 | 1.64 | 2.02 | 1.96 |
| ENSMUSG00000021494 | <i>Ddx41</i>         | 3.96 | 4.62 | 4.33 | 4.17 |
| ENSMUSG00000021495 | <i>BC021381</i>      | 2.29 | 3.01 | 2.57 | 2.62 |
| ENSMUSG00000021496 | <i>Pcbd2</i>         | 3.99 | 4.22 | 4.02 | 3.9  |
| ENSMUSG00000021497 | <i>Txndc15</i>       | 6.16 | 5.92 | 5.83 | 5.62 |
| ENSMUSG00000021500 | <i>Ddx46</i>         | 3.69 | 3.45 | 3.7  | 3.14 |
| ENSMUSG00000021501 | <i>Caml</i>          | 3.83 | 3.74 | 3.85 | 3.93 |
| ENSMUSG00000021504 | <i>B4galt7</i>       | 2.55 | 2.94 | 2.48 | 2.48 |
| ENSMUSG00000021509 | <i>AU042651</i>      | 2.73 | 3.05 | 3.14 | 2.82 |
| ENSMUSG00000021510 | <i>A530054K11Ri</i>  | 1.17 | 0.1  | 0.51 | 0.28 |
| ENSMUSG00000021514 | <i>Zfp369</i>        | 1.19 | 1.31 | 1.3  | 1.55 |
| ENSMUSG00000021518 | <i>Ptdss1</i>        | 5.24 | 5.23 | 5.12 | 4.99 |
| ENSMUSG00000021519 | <i>Mterfd1</i>       | 4.67 | 3.64 | 4.38 | 3.95 |
| ENSMUSG00000021520 | <i>Uqcrb</i>         | 5.45 | 3.33 | 4.89 | 3.84 |
| ENSMUSG00000021532 | <i>Fastkd3</i>       | 2.23 | 2.43 | 2.02 | 1.89 |
| ENSMUSG00000021537 | <i>Cetn3</i>         | 4.82 | 4.05 | 4.47 | 4.02 |

|                    |                 |      |      |      |      |
|--------------------|-----------------|------|------|------|------|
| ENSMUSG00000021539 | <i>Lect2</i>    | 7.62 | 6.72 | 7.44 | 7.22 |
| ENSMUSG00000021540 | <i>Smad5</i>    | 3.28 | 2.88 | 3.01 | 2.72 |
| ENSMUSG00000021546 | <i>Hnrpk</i>    | 4.75 | 4.45 | 4.64 | 4.36 |
| ENSMUSG00000021548 | <i>Ccnh</i>     | 4    | 2.14 | 3.31 | 2.57 |
| ENSMUSG00000021549 | <i>Rasa1</i>    | 3.19 | 2.27 | 2.86 | 2.13 |
| ENSMUSG00000021550 | <i>NA</i>       | 3.45 | 3.47 | 3.35 | 3.21 |
| ENSMUSG00000021552 | <i>Gkap1</i>    | 2.64 | 1.76 | 2.47 | 1.78 |
| ENSMUSG00000021555 | <i>Mak10</i>    | 3.8  | 3.6  | 3.87 | 3.58 |
| ENSMUSG00000021557 | <i>Nna1</i>     | 2.15 | 1.84 | 1.91 | 1.41 |
| ENSMUSG00000021559 | <i>Dapk1</i>    | 4.36 | 4.42 | 4.26 | 3.65 |
| ENSMUSG00000021573 | <i>Tppp</i>     | 1.43 | 1.32 | 2.15 | 1.74 |
| ENSMUSG00000021576 | <i>Pdcd6</i>    | 5.9  | 5.62 | 6.06 | 5.77 |
| ENSMUSG00000021577 | <i>Sdha</i>     | 7.94 | 7.59 | 7.88 | 7.55 |
| ENSMUSG00000021578 | <i>Ccdc127</i>  | 2.91 | 2.2  | 2.46 | 2.27 |
| ENSMUSG00000021579 | <i>AI595366</i> | 1.07 | 0.94 | 0.99 | 0.68 |
| ENSMUSG00000021583 | <i>Arts1</i>    | 5.45 | 4.42 | 5    | 4.58 |
| ENSMUSG00000021585 | <i>Cast</i>     | 3.37 | 2.64 | 3.16 | 2.8  |
| ENSMUSG00000021589 | <i>Rhobtb3</i>  | 1.49 | 1.27 | 1.61 | 1.09 |
| ENSMUSG00000021591 | <i>Glrx</i>     | 6.01 | 5.81 | 5.85 | 5.88 |
| ENSMUSG00000021592 | <i>Arsk</i>     | 2.26 | 1.86 | 2.22 | 1.67 |
| ENSMUSG00000021594 | <i>Srd5a1</i>   | 5.48 | 4.57 | 5.67 | 4.99 |
| ENSMUSG00000021595 | <i>Nsun2</i>    | 4.96 | 4.87 | 4.85 | 4.59 |
| ENSMUSG00000021598 | <i>Med10</i>    | 3.6  | 3.4  | 3.45 | 3.56 |
| ENSMUSG00000021606 | <i>Ndufs6</i>   | 5.2  | 4.38 | 5.3  | 5.01 |
| ENSMUSG00000021607 | <i>Mrpl36</i>   | 4.81 | 4.93 | 5.31 | 5.03 |
| ENSMUSG00000021610 | <i>Clptm11</i>  | 6.09 | 6.23 | 5.81 | 5.55 |
| ENSMUSG00000021611 | <i>Tert</i>     | 1.17 | 0.69 | 1.54 | 0.77 |
| ENSMUSG00000021615 | <i>Xrcc4</i>    | 2.25 | 1.8  | 1.63 | 1.91 |
| ENSMUSG00000021619 | <i>Atg10</i>    | 2.32 | 1.49 | 1.73 | 1.11 |
| ENSMUSG00000021620 | <i>Acot12</i>   | 6.34 | 5.83 | 5.98 | 5.79 |
| ENSMUSG00000021621 | <i>Zcchc9</i>   | 3.08 | 2.67 | 2.96 | 2.67 |

|                    |                    |        |        |      |      |
|--------------------|--------------------|--------|--------|------|------|
| ENSMUSG00000021622 | <i>Ckmt2</i>       | #NAME? | #NAME? | 1.27 | 1.45 |
| ENSMUSG00000021629 | <i>Slc30a5</i>     | 4.35   | 3.84   | 4.04 | 3.49 |
| ENSMUSG00000021635 | <i>Rad17</i>       | 3.13   | 2.3    | 3.11 | 2.67 |
| ENSMUSG00000021636 | <i>Marveld2</i>    | 2.39   | 2.77   | 2.13 | 2.03 |
| ENSMUSG00000021638 | <i>Ocln</i>        | 3.38   | 3.04   | 3.5  | 2.98 |
| ENSMUSG00000021639 | <i>Gtf2h2</i>      | 2.87   | 1.74   | 2.45 | 1.57 |
| ENSMUSG00000021643 | <i>Serf1</i>       | 3.41   | 2.4    | 2.54 | 2.9  |
| ENSMUSG00000021645 | <i>Smn1</i>        | 2.49   | 2.31   | 2.7  | 2.59 |
| ENSMUSG00000021646 | <i>Mccc2</i>       | 5.46   | 5.25   | 5.61 | 4.89 |
| ENSMUSG00000021650 | <i>Ptcd2</i>       | 4.46   | 4.37   | 4.37 | 4.22 |
| ENSMUSG00000021660 | <i>Btf3</i>        | 2.64   | 2.95   | 2.69 | 2.46 |
| ENSMUSG00000021661 | <i>Ankra2</i>      | 2.28   | 1.74   | 2.38 | 2.22 |
| ENSMUSG00000021665 | <i>Hexb</i>        | 5.14   | 4.4    | 4.94 | 4.28 |
| ENSMUSG00000021666 | <i>Gfm2</i>        | 5.03   | 4.36   | 4.68 | 4.36 |
| ENSMUSG00000021669 | <i>Col4a3bp</i>    | 3.61   | 2.38   | 3.3  | 3.14 |
| ENSMUSG00000021670 | <i>Hmgcr</i>       | 4.51   | 3.77   | 4.53 | 4.39 |
| ENSMUSG00000021671 | <i>1200014M14R</i> | 1.49   | 1.51   | 1.26 | 0.85 |
| ENSMUSG00000021676 | <i>Iqgap2</i>      | 6.75   | 6.15   | 6.71 | 6.33 |
| ENSMUSG00000021681 | <i>Aggf1</i>       | 3.83   | 3.93   | 3.78 | 3.56 |
| ENSMUSG00000021686 | <i>Ap3b1</i>       | 4.27   | 3.92   | 4.43 | 4.06 |
| ENSMUSG00000021687 | <i>Scamp1</i>      | 4.03   | 3.59   | 3.95 | 3.52 |
| ENSMUSG00000021690 | <i>Jmy</i>         | 2.54   | 2.14   | 2.54 | 2.07 |
| ENSMUSG00000021693 | <i>Kif2a</i>       | 2.19   | 0.95   | 1.24 | 0.79 |
| ENSMUSG00000021694 | <i>Ercc8</i>       | 1.41   | 0.86   | 1.3  | 1.37 |
| ENSMUSG00000021701 | <i>Plk2</i>        | 1.51   | 1.91   | 1.76 | 1.47 |
| ENSMUSG00000021703 | <i>Serinc5</i>     | 3.44   | 3.63   | 3.44 | 3.5  |
| ENSMUSG00000021704 | <i>NA</i>          | 0.84   | 0.22   | 1.14 | 1.22 |
| ENSMUSG00000021706 | <i>Zfyve16</i>     | 1.16   | 0.43   | 0.85 | 0.4  |
| ENSMUSG00000021707 | <i>Dhfr</i>        | 4.17   | 3.22   | 3.8  | 3.6  |
| ENSMUSG00000021709 | <i>Erbp2ip</i>     | 4.95   | 3.93   | 4.49 | 3.94 |
| ENSMUSG00000021710 | <i>Nln</i>         | 3.88   | 3.18   | 3.4  | 3.12 |

|                    |                     |      |       |      |       |
|--------------------|---------------------|------|-------|------|-------|
| ENSMUSG00000021711 | <i>2410002O22Ri</i> | 4.54 | 3.8   | 4.32 | 3.85  |
| ENSMUSG00000021712 | <i>Trim23</i>       | 2.69 | 1.56  | 2.17 | 1.39  |
| ENSMUSG00000021713 | <i>Ppwd1</i>        | 2.81 | 1.51  | 2.79 | 1.91  |
| ENSMUSG00000021715 | <i>Sdccag10</i>     | 1.48 | 1.4   | 1.6  | 1.39  |
| ENSMUSG00000021716 | <i>3110031B13Ri</i> | 4.39 | 3.29  | 4.06 | 3.19  |
| ENSMUSG00000021731 | <i>Mrps30</i>       | 4.57 | 4.26  | 4.44 | 4.11  |
| ENSMUSG00000021733 | <i>Slc4a7</i>       | 1.62 | 0.41  | 1.5  | 0.84  |
| ENSMUSG00000021737 | <i>Psmd6</i>        | 5.92 | 5.76  | 5.85 | 5.75  |
| ENSMUSG00000021738 | <i>Atxn7</i>        | 1.86 | 2.31  | 2.38 | 2.5   |
| ENSMUSG00000021745 | <i>Ptprg</i>        | 2.74 | 2.37  | 2.06 | 1.87  |
| ENSMUSG00000021747 | <i>4930452B06Ri</i> | 0.75 | -1.13 | 1.12 | -1.96 |
| ENSMUSG00000021748 | <i>Pdhb</i>         | 5.1  | 4.88  | 5.45 | 5.29  |
| ENSMUSG00000021751 | <i>Acox2</i>        | 7.24 | 7.42  | 7.73 | 7.14  |
| ENSMUSG00000021752 | <i>Kctd6</i>        | 2.39 | 2.57  | 2.44 | 2.39  |
| ENSMUSG00000021754 | <i>Map3k1</i>       | 1.63 | 1.36  | 2.01 | 1.13  |
| ENSMUSG00000021756 | <i>Il6st</i>        | 5.49 | 5.37  | 5.36 | 5.22  |
| ENSMUSG00000021759 | <i>Ppap2a</i>       | 4.19 | 3.94  | 3.63 | 3.08  |
| ENSMUSG00000021764 | <i>Ndufs4</i>       | 6.15 | 5.81  | 6.42 | 5.44  |
| ENSMUSG00000021770 | <i>Samd8</i>        | 3.64 | 2.52  | 3.53 | 2.78  |
| ENSMUSG00000021771 | <i>Vdac2</i>        | 5.61 | 5     | 5.61 | 5.38  |
| ENSMUSG00000021772 | <i>Nkiras1</i>      | 4.69 | 3.47  | 4.57 | 3.41  |
| ENSMUSG00000021773 | <i>Comtd1</i>       | 1.5  | 2.72  | 1.97 | 2.14  |
| ENSMUSG00000021774 | <i>Ube2e1</i>       | 4.66 | 3.92  | 3.94 | 3.85  |
| ENSMUSG00000021775 | <i>Nr1d2</i>        | 4.28 | 2.82  | 4.34 | 3.96  |
| ENSMUSG00000021779 | <i>Thrb</i>         | 4.13 | 3.39  | 3.83 | 3.31  |
| ENSMUSG00000021785 | <i>Ngly1</i>        | 4.51 | 3.81  | 4.24 | 3.69  |
| ENSMUSG00000021786 | <i>Oxsm</i>         | 3.97 | 3.5   | 3.79 | 3.54  |
| ENSMUSG00000021792 | <i>5730469M10Ri</i> | 6.44 | 5.83  | 6.13 | 5.56  |
| ENSMUSG00000021794 | <i>Glud1</i>        | 8.84 | 8.42  | 8.6  | 8.39  |
| ENSMUSG00000021796 | <i>Bmpr1a</i>       | 4.02 | 3.05  | 3.57 | 3.12  |
| ENSMUSG00000021807 | <i>2700060E02Ri</i> | 4.06 | 3.98  | 3.88 | 4.04  |

|                    |                     |      |      |      |      |
|--------------------|---------------------|------|------|------|------|
| ENSMUSG00000021809 | <i>Nudt13</i>       | 2.21 | 1.97 | 2.13 | 1.89 |
| ENSMUSG00000021810 | <i>Ecd</i>          | 4.14 | 4.28 | 4.29 | 4    |
| ENSMUSG00000021811 | <i>Dnajc9</i>       | 2.39 | 1.55 | 1.63 | 1.41 |
| ENSMUSG00000021814 | <i>Anxa7</i>        | 5.35 | 5.72 | 5.09 | 5.26 |
| ENSMUSG00000021816 | <i>Ppp3cb</i>       | 4.05 | 3.24 | 3.82 | 3.15 |
| ENSMUSG00000021819 | <i>2310021P13Ri</i> | 2.7  | 3.4  | 3.09 | 2.96 |
| ENSMUSG00000021820 | <i>Camk2g</i>       | 1.95 | 2.02 | 1.84 | 1.33 |
| ENSMUSG00000021823 | <i>Vcl</i>          | 3.08 | 3.04 | 3.42 | 3.06 |
| ENSMUSG00000021824 | <i>Ap3m1</i>        | 5.94 | 4.75 | 5.61 | 4.85 |
| ENSMUSG00000021830 | <i>Txndc16</i>      | 1.39 | 0.6  | 0.95 | 0.77 |
| ENSMUSG00000021831 | <i>Ero1l</i>        | 2.49 | 1.88 | 2.23 | 1.87 |
| ENSMUSG00000021832 | <i>Psmc6</i>        | 5.84 | 5.07 | 5.47 | 5.06 |
| ENSMUSG00000021840 | <i>C130032J12Ri</i> | 3.76 | 4.26 | 4.27 | 4.14 |
| ENSMUSG00000021843 | <i>Ktn1</i>         | 2.49 | 1.53 | 2.09 | 1.51 |
| ENSMUSG00000021846 | <i>Peli2</i>        | 3.23 | 2.61 | 3.06 | 2.58 |
| ENSMUSG00000021866 | <i>Anxa11</i>       | 2.65 | 3.53 | 3.14 | 3.35 |
| ENSMUSG00000021868 | <i>Ppif</i>         | 5.27 | 5.65 | 6.09 | 5.37 |
| ENSMUSG00000021870 | <i>Slmap</i>        | 4.48 | 3.59 | 4.38 | 3.76 |
| ENSMUSG00000021871 | <i>Pnp</i>          | 6.25 | 6.35 | 6.3  | 6.03 |
| ENSMUSG00000021876 | <i>Rnase4</i>       | 9.59 | 9.68 | 9.63 | 9.51 |
| ENSMUSG00000021877 | <i>Arf4</i>         | 6.9  | 5.92 | 6.55 | 6.22 |
| ENSMUSG00000021884 | <i>Hacl1</i>        | 8.5  | 8.01 | 7.06 | 7.16 |
| ENSMUSG00000021890 | <i>Eaf1</i>         | 4.07 | 4.21 | 3.98 | 3.83 |
| ENSMUSG00000021891 | <i>Mettl6</i>       | 2.08 | 2.06 | 2.28 | 2.45 |
| ENSMUSG00000021892 | <i>Sh3bp5</i>       | 5.12 | 5.25 | 5.13 | 4.74 |
| ENSMUSG00000021893 | <i>Capn7</i>        | 4.21 | 3.55 | 3.83 | 3.37 |
| ENSMUSG00000021895 | <i>Arhgef3</i>      | 3.93 | 3.62 | 3.65 | 3.63 |
| ENSMUSG00000021900 | <i>Btd</i>          | 6.01 | 6.14 | 5.72 | 5.73 |
| ENSMUSG00000021901 | <i>Bap1</i>         | 3.84 | 4.34 | 4.03 | 3.95 |
| ENSMUSG00000021902 | <i>Phf7</i>         | 2.58 | 1.84 | 2.52 | 2.29 |
| ENSMUSG00000021905 | <i>Dph3</i>         | 2.98 | 2.78 | 2.91 | 2.86 |

|                    |                     |      |       |      |      |
|--------------------|---------------------|------|-------|------|------|
| ENSMUSG00000021906 | <i>Oxnad1</i>       | 3.99 | 3.99  | 4.07 | 3.6  |
| ENSMUSG00000021908 | <i>NA</i>           | 2.07 | 2.03  | 1.94 | 1.84 |
| ENSMUSG00000021910 | <i>Nisch</i>        | 4.87 | 5.16  | 5.02 | 4.66 |
| ENSMUSG00000021911 | <i>Parg</i>         | 3.1  | 2.68  | 2.74 | 2.56 |
| ENSMUSG00000021916 | <i>Glt8d1</i>       | 2.49 | 1.8   | 2.29 | 1.61 |
| ENSMUSG00000021917 | <i>Spcl1</i>        | 5.78 | 5.75  | 5.72 | 5.46 |
| ENSMUSG00000021918 | <i>Nek4</i>         | 2.53 | 2.22  | 2.3  | 1.77 |
| ENSMUSG00000021922 | <i>Itih4</i>        | 9.83 | 10.28 | 9.95 | 9.98 |
| ENSMUSG00000021928 | <i>Ebpl</i>         | 6.68 | 6.74  | 6.76 | 6.83 |
| ENSMUSG00000021929 | <i>Kpna3</i>        | 4.5  | 3.88  | 4.15 | 3.6  |
| ENSMUSG00000021930 | <i>6330409N04Ri</i> | 3.99 | 2.93  | 3.63 | 2.68 |
| ENSMUSG00000021932 | <i>Rnaseh2b</i>     | 2.61 | 1.88  | 2.49 | 2.13 |
| ENSMUSG00000021936 | <i>Mapk8</i>        | 2.55 | 1.73  | 2.27 | 1.86 |
| ENSMUSG00000021938 | <i>Pspcl</i>        | 1.55 | 1.19  | 1.79 | 1.43 |
| ENSMUSG00000021939 | <i>Ctsb</i>         | 9.14 | 8.8   | 9.06 | 8.75 |
| ENSMUSG00000021943 | <i>Gdf10</i>        | 1.16 | -0.39 | 1.61 | 1.53 |
| ENSMUSG00000021944 | <i>Gata4</i>        | 3.07 | 3.87  | 2.85 | 2.91 |
| ENSMUSG00000021945 | <i>Zmym2</i>        | 3.18 | 2.48  | 2.86 | 2.53 |
| ENSMUSG00000021947 | <i>Cryll</i>        | 3.74 | 4.2   | 4.13 | 3.53 |
| ENSMUSG00000021948 | <i>Prkcd</i>        | 1.84 | 1.76  | 1.8  | 1.44 |
| ENSMUSG00000021951 | <i>N6amt2</i>       | 2.54 | 2.63  | 2.92 | 2.75 |
| ENSMUSG00000021957 | <i>Tkt</i>          | 5.87 | 6.14  | 6.1  | 5.9  |
| ENSMUSG00000021958 | <i>2610028A01Ri</i> | 1.84 | 2.48  | 1.52 | 1.76 |
| ENSMUSG00000021959 | <i>Lats2</i>        | 2.36 | 2.58  | 2.52 | 2.58 |
| ENSMUSG00000021962 | <i>SMIF</i>         | 1.23 | 0.98  | 0.99 | 1.03 |
| ENSMUSG00000021963 | <i>Sap18</i>        | 1.63 | 0.51  | 1.32 | 0.64 |
| ENSMUSG00000021967 | <i>Mrp63</i>        | 4.57 | 5.23  | 4.81 | 4.52 |
| ENSMUSG00000021969 | <i>Zdhhc20</i>      | 2.25 | 1.37  | 1.91 | 1.45 |
| ENSMUSG00000021972 | <i>Hmbox1</i>       | 1.63 | 1.53  | 1.49 | 1.41 |
| ENSMUSG00000021973 | <i>Efha1</i>        | 4.76 | 4     | 4.2  | 3.58 |
| ENSMUSG00000021975 | <i>Ints9</i>        | 1.66 | 2.09  | 2.09 | 2.01 |



|                    |                      |      |       |       |       |
|--------------------|----------------------|------|-------|-------|-------|
| ENSMUSG00000021978 | <i>Extl3</i>         | 3.29 | 3.66  | 3.3   | 3.26  |
| ENSMUSG00000021981 | <i>Cab39l</i>        | 5.92 | 4.94  | 5.29  | 4.9   |
| ENSMUSG00000021982 | <i>Cdadcl</i>        | 5.37 | 4.78  | 5.02  | 4.79  |
| ENSMUSG00000021987 | <i>Mtmr6</i>         | 3.75 | 3.13  | 3.53  | 3.15  |
| ENSMUSG00000021990 | <i>NA</i>            | 2.8  | 2.67  | 3.05  | 2.74  |
| ENSMUSG00000021993 | <i>Mipep</i>         | 4.85 | 4.47  | 4.75  | 4.28  |
| ENSMUSG00000021996 | <i>Esd</i>           | 5.67 | 5     | 5.47  | 5.6   |
| ENSMUSG00000021998 | <i>Lcp1</i>          | 4.24 | 3.77  | 4.16  | 3.95  |
| ENSMUSG00000021999 | <i>Cpb2</i>          | 8.29 | 7.84  | 8.08  | 7.62  |
| ENSMUSG00000022000 | <i>Zc3h13</i>        | 2.22 | 2.18  | 2.15  | 1.68  |
| ENSMUSG00000022003 | <i>Slc25a30</i>      | 4.45 | 3.02  | 3.12  | 2.99  |
| ENSMUSG00000022008 | <i>I200011118Rik</i> | 2.98 | 1.76  | 2.4   | 1.97  |
| ENSMUSG00000022009 | <i>Nufip1</i>        | 1.86 | 0.98  | 1.45  | 0.92  |
| ENSMUSG00000022010 | <i>mKIAA1994</i>     | 3.14 | 3.47  | 3.45  | 3.15  |
| ENSMUSG00000022013 | <i>Dnajc15</i>       | 5.64 | 5.13  | 5.81  | 5.59  |
| ENSMUSG00000022016 | <i>NA</i>            | 3.74 | 2.58  | 3.26  | 2.67  |
| ENSMUSG00000022019 | <i>Tdrd3</i>         | 2.51 | 2.12  | 2.71  | 1.88  |
| ENSMUSG00000022020 | <i>Narg1l</i>        | 2.3  | 1.79  | 1.88  | 1.39  |
| ENSMUSG00000022022 | <i>Mtrf1</i>         | 2.34 | 2.36  | 2.45  | 2.41  |
| ENSMUSG00000022023 | <i>Wbp4</i>          | 3.14 | 2.68  | 2.99  | 2.46  |
| ENSMUSG00000022024 | <i>Sugt1</i>         | 4.91 | 4.62  | 4.67  | 4.11  |
| ENSMUSG00000022025 | <i>Lect1</i>         | 1.26 | 1.11  | 0.92  | 1.47  |
| ENSMUSG00000022031 | <i>Elp3</i>          | 3.21 | 3.75  | 3.49  | 3.03  |
| ENSMUSG00000022035 | <i>Ccdc25</i>        | 4.69 | 4.32  | 4.56  | 4.22  |
| ENSMUSG00000022037 | <i>Clu</i>           | 9.85 | 10.29 | 10.15 | 10.15 |
| ENSMUSG00000022040 | <i>Ephx2</i>         | 8.56 | 8.08  | 8.29  | 7.95  |
| ENSMUSG00000022041 | <i>Chrna2</i>        | 1.66 | 1.33  | 1.37  | 1.15  |
| ENSMUSG00000022048 | <i>Dpysl2</i>        | 1.08 | 0.1   | 1.42  | 1.18  |
| ENSMUSG00000022051 | <i>Bnip3l</i>        | 4.97 | 3.68  | 4.54  | 3.58  |
| ENSMUSG00000022052 | <i>Ppp2r2a</i>       | 2.85 | 2.01  | 2.25  | 2     |
| ENSMUSG00000022057 | <i>Adamdec1</i>      | 1.24 | 1.54  | 0.36  | 1.18  |

|                    |                  |      |      |      |      |
|--------------------|------------------|------|------|------|------|
| ENSMUSG00000022066 | <i>Entpd4</i>    | 4.71 | 4.86 | 4.27 | 4.31 |
| ENSMUSG00000022075 | <i>Rhobtb2</i>   | 1.53 | 1.93 | 1.9  | 1.53 |
| ENSMUSG00000022089 | <i>Bin3</i>      | 3.3  | 3.22 | 3.16 | 2.85 |
| ENSMUSG00000022091 | <i>Sorbs3</i>    | 4.06 | 3.8  | 4.88 | 3.84 |
| ENSMUSG00000022094 | <i>Slc39a14</i>  | 6.45 | 6.38 | 5.93 | 5.88 |
| ENSMUSG00000022095 | <i>NA</i>        | 1.36 | 2.39 | 1.83 | 1.45 |
| ENSMUSG00000022098 | <i>mKIAA4159</i> | 5.07 | 5.79 | 5.36 | 5.22 |
| ENSMUSG00000022100 | <i>Xpo7</i>      | 2.89 | 2.46 | 2.75 | 2.34 |
| ENSMUSG00000022105 | <i>Rb1</i>       | 1.92 | 0.73 | 1.97 | 1.32 |
| ENSMUSG00000022106 | <i>Rcbtb2</i>    | 3.28 | 3.17 | 3.19 | 3.02 |
| ENSMUSG00000022108 | <i>Itm2b</i>     | 9.5  | 9.15 | 9.34 | 9.09 |
| ENSMUSG00000022109 | <i>Med4</i>      | 2.41 | 2.48 | 2.1  | 2.31 |
| ENSMUSG00000022110 | <i>Sucla2</i>    | 7.05 | 6.17 | 6.58 | 5.99 |
| ENSMUSG00000022111 | <i>Uchl3</i>     | 2.88 | 1.53 | 1.79 | 1.47 |
| ENSMUSG00000022119 | <i>Rbm26</i>     | 2.63 | 1.99 | 2.5  | 2.16 |
| ENSMUSG00000022122 | <i>Ednrb</i>     | 2.93 | 1.82 | 2.44 | 2.32 |
| ENSMUSG00000022124 | <i>Fbxl3</i>     | 3.62 | 2.9  | 3.51 | 2.97 |
| ENSMUSG00000022125 | <i>Cln5</i>      | 4.58 | 3.7  | 4.38 | 3.98 |
| ENSMUSG00000022130 | <i>Tgds</i>      | 4.98 | 4.49 | 5    | 4.52 |
| ENSMUSG00000022131 | <i>Gpr180</i>    | 4.25 | 3.97 | 3.88 | 3.62 |
| ENSMUSG00000022136 | <i>Dnajc3a</i>   | 6.57 | 6.46 | 6.05 | 5.93 |
| ENSMUSG00000022139 | <i>Mbnl2</i>     | 4.3  | 3.96 | 4.04 | 3.87 |
| ENSMUSG00000022141 | <i>AK020398</i>  | 3.41 | 2.61 | 3.02 | 2.46 |
| ENSMUSG00000022142 | <i>Nup155</i>    | 2.54 | 2.27 | 2.53 | 2.05 |
| ENSMUSG00000022148 | <i>Fyb</i>       | 1.24 | 0.44 | 1.21 | 0.17 |
| ENSMUSG00000022149 | <i>C9</i>        | 7.28 | 6.99 | 7.05 | 6.77 |
| ENSMUSG00000022150 | <i>Dab2</i>      | 2.34 | 2.28 | 2.16 | 1.77 |
| ENSMUSG00000022151 | <i>Ttc33</i>     | 4.06 | 3.33 | 4.07 | 3.81 |
| ENSMUSG00000022159 | <i>Rab2b</i>     | 1.34 | 1.42 | 1.07 | 0.92 |
| ENSMUSG00000022160 | <i>Mettl3</i>    | 3.08 | 2.95 | 2.99 | 2.91 |
| ENSMUSG00000022174 | <i>Dad1</i>      | 6.75 | 7.52 | 7.7  | 7.57 |

|                    |                     |      |      |      |      |
|--------------------|---------------------|------|------|------|------|
| ENSMUSG00000022175 | <i>Lrp10</i>        | 4.38 | 5.13 | 4.91 | 4.83 |
| ENSMUSG00000022177 | <i>D14Ert500e</i>   | 2.65 | 3.61 | 3.12 | 2.98 |
| ENSMUSG00000022178 | <i>Jub</i>          | 1.44 | 1.21 | 0.91 | 0.97 |
| ENSMUSG00000022179 | <i>4931414P19Ri</i> | 1.36 | 1.74 | 1.87 | 1.55 |
| ENSMUSG00000022181 | <i>C6</i>           | 2.91 | 3.14 | 2.83 | 2.78 |
| ENSMUSG00000022184 | <i>Fbxo4</i>        | 3.37 | 2.66 | 2.63 | 2.64 |
| ENSMUSG00000022185 | <i>Acin1</i>        | 3.66 | 3.93 | 3.67 | 3.44 |
| ENSMUSG00000022186 | <i>Oxct1</i>        | 1.47 | 1.31 | 1.41 | 0.75 |
| ENSMUSG00000022191 | <i>Rnasen</i>       | 1.73 | 2    | 1.98 | 1.62 |
| ENSMUSG00000022193 | <i>Psmb5</i>        | 3.9  | 3.05 | 3.45 | 4.05 |
| ENSMUSG00000022194 | <i>Bcl2l2</i>       | 2.6  | 2.65 | 2.8  | 2.59 |
| ENSMUSG00000022195 | <i>6030458C11Ri</i> | 2.83 | 2.44 | 3.07 | 2.79 |
| ENSMUSG00000022198 | <i>Pabpn1</i>       | 3.68 | 4.28 | 4.53 | 4.21 |
| ENSMUSG00000022200 | <i>Golph3</i>       | 6.12 | 5.15 | 5.7  | 5.46 |
| ENSMUSG00000022201 | <i>Zfr</i>          | 4.4  | 4.13 | 4.1  | 3.78 |
| ENSMUSG00000022204 | <i>Ngdn</i>         | 4.34 | 3.96 | 4.05 | 3.89 |
| ENSMUSG00000022205 | <i>Sub1</i>         | 6.12 | 5.41 | 6.05 | 6.27 |
| ENSMUSG00000022210 | <i>Dhrs4</i>        | 6.74 | 6.87 | 6.46 | 6.33 |
| ENSMUSG00000022214 | <i>Wdr23</i>        | 7.26 | 7.51 | 7.18 | 6.93 |
| ENSMUSG00000022215 | <i>1110028A07Ri</i> | 2.51 | 1.92 | 2.58 | 2.08 |
| ENSMUSG00000022216 | <i>Psmel</i>        | 6.23 | 5.21 | 5.65 | 5.35 |
| ENSMUSG00000022217 | <i>1500005A01Ri</i> | 3.6  | 3.66 | 4.05 | 3.61 |
| ENSMUSG00000022218 | <i>Tgm1</i>         | 1.54 | 2    | 2.1  | 2.57 |
| ENSMUSG00000022219 | <i>Cideb</i>        | 8.1  | 8.53 | 8.44 | 8.29 |
| ENSMUSG00000022220 | <i>Adcy4</i>        | 1.07 | 1.97 | 0.88 | 1.22 |
| ENSMUSG00000022223 | <i>2310014G06Ri</i> | 3.98 | 4.16 | 3.97 | 3.51 |
| ENSMUSG00000022228 | <i>Zfp187</i>       | 4.27 | 3.08 | 4.18 | 3.74 |
| ENSMUSG00000022234 | <i>Cct5</i>         | 6.71 | 7.1  | 6.74 | 6.76 |
| ENSMUSG00000022235 | <i>Cmb1</i>         | 7.8  | 7.55 | 7.94 | 7.47 |
| ENSMUSG00000022236 | <i>Ropn11</i>       | 3.53 | 3.68 | 3.99 | 3.76 |
| ENSMUSG00000022237 | <i>5730557B15Ri</i> | 2.43 | 1.9  | 2.92 | 2.63 |

|                    |                     |       |      |      |      |
|--------------------|---------------------|-------|------|------|------|
| ENSMUSG00000022241 | <i>Tars</i>         | 6.3   | 6.05 | 5.83 | 5.54 |
| ENSMUSG00000022244 | <i>Amacr</i>        | 6.18  | 6.44 | 6.11 | 5.84 |
| ENSMUSG00000022246 | <i>Rai14</i>        | 2.99  | 2.95 | 2.89 | 2.77 |
| ENSMUSG00000022247 | <i>Bxdc2</i>        | 4.53  | 4.05 | 4.12 | 3.6  |
| ENSMUSG00000022248 | <i>Rad1</i>         | 2.38  | 1.78 | 1.72 | 1.76 |
| ENSMUSG00000022253 | <i>1110020G09Ri</i> | 6.44  | 5.76 | 5.87 | 5.37 |
| ENSMUSG00000022255 | <i>Mtdh</i>         | 5.09  | 4.27 | 4.74 | 4.19 |
| ENSMUSG00000022257 | <i>Laptm4b</i>      | 4.01  | 3.7  | 4.05 | 3.77 |
| ENSMUSG00000022261 | <i>Sdc2</i>         | 7.03  | 6.64 | 6.74 | 6.43 |
| ENSMUSG00000022263 | <i>Trio</i>         | 0.68  | 0.9  | 1.09 | 1.08 |
| ENSMUSG00000022265 | <i>Ank</i>          | 4.46  | 4.21 | 4.53 | 4.19 |
| ENSMUSG00000022270 | <i>1810015C04Ri</i> | 7.13  | 5.61 | 6.33 | 5.42 |
| ENSMUSG00000022272 | <i>myo 10</i>       | 1.74  | 2.17 | 2.6  | 2.57 |
| ENSMUSG00000022280 | <i>Rnf19a</i>       | 3.89  | 2.91 | 3.14 | 2.72 |
| ENSMUSG00000022283 | <i>Pabpc1</i>       | 6.53  | 5.53 | 6.24 | 5.81 |
| ENSMUSG00000022285 | <i>Ywhaz</i>        | 5.02  | 4.42 | 4.82 | 4.44 |
| ENSMUSG00000022295 | <i>Atp6v1c1</i>     | 4.74  | 4.34 | 4.63 | 4.56 |
| ENSMUSG00000022299 | <i>Slc25a32</i>     | 4.69  | 3.08 | 4.24 | 3.48 |
| ENSMUSG00000022300 | <i>Wdsof1</i>       | 4.65  | 4.2  | 4.35 | 3.8  |
| ENSMUSG00000022304 | <i>Dpys</i>         | 7.6   | 7.57 | 7.61 | 7.47 |
| ENSMUSG00000022307 | <i>Oxr1</i>         | 5.17  | 4.16 | 4.73 | 4.26 |
| ENSMUSG00000022312 | <i>Eif3h</i>        | 5.67  | 5.81 | 5.71 | 5.66 |
| ENSMUSG00000022313 | <i>D530033C11R</i>  | 2.1   | 1.58 | 1.89 | 1.99 |
| ENSMUSG00000022314 | <i>Rad21</i>        | 4.72  | 4.51 | 4.65 | 4.3  |
| ENSMUSG00000022323 | <i>Hrsp12</i>       | 10.25 | 9.42 | 9.93 | 9.39 |
| ENSMUSG00000022329 | <i>Stk3</i>         | 2.9   | 1.97 | 2.52 | 2.15 |
| ENSMUSG00000022332 | <i>Khdrbs3</i>      | 4.02  | 3.8  | 3.96 | 3.76 |
| ENSMUSG00000022336 | <i>Eif3e</i>        | 4.42  | 3.89 | 3.87 | 3.78 |
| ENSMUSG00000022337 | <i>Ttc35</i>        | 5.43  | 3.79 | 5.02 | 4.34 |
| ENSMUSG00000022338 | <i>Eny2</i>         | 5.72  | 4.25 | 5.06 | 4.65 |
| ENSMUSG00000022339 | <i>Ebag9</i>        | 4.21  | 3.34 | 3.51 | 3.53 |

|                    |                     |      |      |      |      |
|--------------------|---------------------|------|------|------|------|
| ENSMUSG00000022347 | <i>Albg</i>         | 9.83 | 7.43 | 8.43 | 5.72 |
| ENSMUSG00000022350 | <i>E430025E21Ri</i> | 4    | 3.51 | 4.22 | 3.45 |
| ENSMUSG00000022351 | <i>Sqle</i>         | 5.09 | 4.23 | 3.94 | 3.46 |
| ENSMUSG00000022353 | <i>Mtss1</i>        | 5.82 | 6.15 | 5.85 | 5.94 |
| ENSMUSG00000022354 | <i>Ndufb9</i>       | 8.15 | 8.18 | 8.08 | 7.92 |
| ENSMUSG00000022358 | <i>Fbxo32</i>       | 1.04 | 0.44 | 0.92 | 0.53 |
| ENSMUSG00000022359 | <i>2410187C16Ri</i> | 2.39 | 2.26 | 2.6  | 2.04 |
| ENSMUSG00000022361 | <i>Zhxl</i>         | 4.32 | 3.56 | 3.99 | 3.51 |
| ENSMUSG00000022362 | <i>9130401M01Ri</i> | 2.73 | 3.5  | 3.19 | 2.81 |
| ENSMUSG00000022365 | <i>Der11</i>        | 5    | 5.26 | 5.18 | 5    |
| ENSMUSG00000022370 | <i>Mrpl13</i>       | 6.15 | 5.28 | 5.82 | 5.21 |
| ENSMUSG00000022371 | <i>Coll4a1</i>      | 3.54 | 3.33 | 3.22 | 3.16 |
| ENSMUSG00000022372 | <i>Sla</i>          | 0.82 | 0.03 | 1.02 | 0.29 |
| ENSMUSG00000022377 | <i>Ddef1</i>        | 2.27 | 2.33 | 2.57 | 1.9  |
| ENSMUSG00000022378 | <i>0910001A06Ri</i> | 2.03 | 0.6  | 1.63 | 0.93 |
| ENSMUSG00000022383 | <i>Ppara</i>        | 5.77 | 5.44 | 5.54 | 5.45 |
| ENSMUSG00000022386 | <i>Trmu</i>         | 2.07 | 1.78 | 1.97 | 1.57 |
| ENSMUSG00000022387 | <i>mKIAA4191</i>    | 2.47 | 2.46 | 2.48 | 2.41 |
| ENSMUSG00000022389 | <i>Tef</i>          | 4.71 | 4.15 | 5.53 | 5.36 |
| ENSMUSG00000022390 | <i>Zc3h7b</i>       | 3.29 | 3.52 | 3.43 | 3.2  |
| ENSMUSG00000022391 | <i>Rangap1</i>      | 4.54 | 5.12 | 4.71 | 4.65 |
| ENSMUSG00000022394 | <i>L3mbtl2</i>      | 2.84 | 3.32 | 3.18 | 2.99 |
| ENSMUSG00000022400 | <i>Rbx1</i>         | 4.28 | 3.45 | 3.76 | 3.42 |
| ENSMUSG00000022401 | <i>Xpnpep3</i>      | 2.75 | 2.77 | 2.63 | 2.41 |
| ENSMUSG00000022403 | <i>St13</i>         | 7.07 | 6.18 | 6.56 | 6.4  |
| ENSMUSG00000022404 | <i>Slc25a17</i>     | 5.4  | 4.59 | 5.05 | 4.65 |
| ENSMUSG00000022407 | <i>Adsl</i>         | 2.47 | 3.1  | 2.73 | 2.29 |
| ENSMUSG00000022412 | <i>Smcr7l</i>       | 3.6  | 3.33 | 3.34 | 3.2  |
| ENSMUSG00000022414 | <i>Map3k7ip1</i>    | 0.5  | 1.4  | 1.08 | 0.35 |
| ENSMUSG00000022419 | <i>AK164741</i>     | 4.64 | 4.59 | 4.42 | 4.42 |
| ENSMUSG00000022420 | <i>Dnalc4</i>       | 2.11 | 2.45 | 2.32 | 2.16 |

|                    |                     |      |      |      |      |
|--------------------|---------------------|------|------|------|------|
| ENSMUSG00000022425 | <i>Enpp2</i>        | 4.67 | 4.36 | 4.85 | 4.62 |
| ENSMUSG00000022426 | <i>Josd1</i>        | 4.47 | 4.1  | 4.19 | 4.01 |
| ENSMUSG00000022427 | <i>Tomm22</i>       | 5.02 | 4.87 | 5.06 | 4.69 |
| ENSMUSG00000022428 | <i>Cby1</i>         | 2.3  | 2.45 | 3.04 | 3.12 |
| ENSMUSG00000022433 | <i>Csnk1e</i>       | 1.07 | 1.07 | 1.23 | 0.55 |
| ENSMUSG00000022437 | <i>Samm50</i>       | 5.77 | 5.78 | 5.68 | 5.41 |
| ENSMUSG00000022443 | <i>Myh9</i>         | 4.17 | 4.68 | 4.56 | 4.46 |
| ENSMUSG00000022445 | <i>Cyp2d26</i>      | 9.4  | 9.54 | 9.49 | 9.3  |
| ENSMUSG00000022450 | <i>Ndufa6</i>       | 7.38 | 7.62 | 7.78 | 8.05 |
| ENSMUSG00000022451 | <i>Twf1</i>         | 4.45 | 4.25 | 4.52 | 4.05 |
| ENSMUSG00000022452 | <i>1500032L24Ri</i> | 6.28 | 6.7  | 6.53 | 6.41 |
| ENSMUSG00000022453 | <i>Naga</i>         | 4.37 | 4.95 | 4.68 | 4.62 |
| ENSMUSG00000022462 | <i>Slc38a2</i>      | 5.78 | 4.98 | 5.56 | 5.72 |
| ENSMUSG00000022463 | <i>Srebf2</i>       | 4.36 | 5.03 | 4.24 | 4.15 |
| ENSMUSG00000022464 | <i>Slc38a4</i>      | 8.65 | 7.99 | 8.84 | 8.23 |
| ENSMUSG00000022466 | <i>Rpap3</i>        | 1.47 | 1.6  | 1.59 | 1.49 |
| ENSMUSG00000022471 | <i>Xrcc6</i>        | 3.47 | 3.5  | 3.63 | 3.2  |
| ENSMUSG00000022472 | <i>D15Wsu75e</i>    | 4.79 | 5.02 | 5.03 | 4.91 |
| ENSMUSG00000022473 | <i>NA</i>           | 5.18 | 5.56 | 5.27 | 5.06 |
| ENSMUSG00000022474 | <i>Pmm1</i>         | 1.94 | 1.59 | 2.05 | 1.82 |
| ENSMUSG00000022476 | <i>Polr3h</i>       | 1.84 | 3.1  | 2.38 | 2.51 |
| ENSMUSG00000022477 | <i>Aco2</i>         | 5.96 | 5.68 | 6.28 | 5.89 |
| ENSMUSG00000022488 | <i>Nckap1l</i>      | 1.31 | 0.52 | 1.32 | 0.52 |
| ENSMUSG00000022498 | <i>Txndc11</i>      | 2.46 | 2.79 | 2.18 | 2.36 |
| ENSMUSG00000022500 | <i>Litaf</i>        | 5.63 | 5.59 | 5.32 | 4.97 |
| ENSMUSG00000022503 | <i>Nubp1</i>        | 3.85 | 4.49 | 3.82 | 3.72 |
| ENSMUSG00000022505 | <i>Emp2</i>         | 2.77 | 3.18 | 2.13 | 2.56 |
| ENSMUSG00000022507 | <i>1810013L24Ri</i> | 3.96 | 3.66 | 3.81 | 3.82 |
| ENSMUSG00000022508 | <i>Bcl6</i>         | 1.84 | 4.66 | 4.59 | 3.37 |
| ENSMUSG00000022512 | <i>Cldn1</i>        | 5.24 | 4.97 | 4.99 | 4.78 |
| ENSMUSG00000022514 | <i>Illrap</i>       | 4.39 | 4.73 | 4.5  | 4.76 |

|                    |                     |      |      |      |      |
|--------------------|---------------------|------|------|------|------|
| ENSMUSG00000022515 | <i>Anks3</i>        | 1.59 | 2.36 | 2.02 | 2.09 |
| ENSMUSG00000022516 | <i>Nudt16l1</i>     | 3.45 | 4.19 | 3.56 | 3.47 |
| ENSMUSG00000022517 | <i>mKIAA0544</i>    | 4.79 | 5.45 | 5.3  | 5.19 |
| ENSMUSG00000022521 | <i>Crebbp</i>       | 2.67 | 2.95 | 3.05 | 3.08 |
| ENSMUSG00000022528 | <i>Hes1</i>         | 2.94 | 3.2  | 2.12 | 1.91 |
| ENSMUSG00000022529 | <i>Zfp263</i>       | 2.76 | 1.93 | 2.2  | 2.1  |
| ENSMUSG00000022533 | <i>NA</i>           | 5.5  | 4.98 | 5.22 | 4.88 |
| ENSMUSG00000022536 | <i>3930401K13Ri</i> | 5.47 | 5.77 | 5.55 | 5.35 |
| ENSMUSG00000022538 | <i>Lsg1</i>         | 3.02 | 3.35 | 2.94 | 3.05 |
| ENSMUSG00000022540 | <i>Rogdi</i>        | 3.46 | 4.36 | 3.51 | 3.4  |
| ENSMUSG00000022544 | <i>5730409G15Ri</i> | 2.98 | 3.44 | 3.19 | 3.03 |
| ENSMUSG00000022545 | <i>Ercc4</i>        | 1.64 | 1.92 | 1.59 | 1.56 |
| ENSMUSG00000022546 | <i>Gpt1</i>         | 7.22 | 7.85 | 7.55 | 7.33 |
| ENSMUSG00000022550 | <i>Adck5</i>        | 3.32 | 5.1  | 3.47 | 3.55 |
| ENSMUSG00000022551 | <i>Cycl</i>         | 7.58 | 7.63 | 7.57 | 7.31 |
| ENSMUSG00000022552 | <i>Sharpin</i>      | 4.62 | 4.69 | 4.72 | 4.35 |
| ENSMUSG00000022553 | <i>Mafk</i>         | 3.79 | 3.91 | 3.77 | 3.48 |
| ENSMUSG00000022554 | <i>Brp16</i>        | 1.28 | 2.15 | 1.82 | 1.87 |
| ENSMUSG00000022555 | <i>Dgat</i>         | 3.75 | 3.98 | 3.84 | 3.76 |
| ENSMUSG00000022556 | <i>Hsf1</i>         | 2.8  | 4.07 | 3.58 | 3.55 |
| ENSMUSG00000022557 | <i>Bop1</i>         | 3.68 | 4.65 | 3.84 | 3.87 |
| ENSMUSG00000022558 | <i>NA</i>           | 2.95 | 3.81 | 3.16 | 3.13 |
| ENSMUSG00000022559 | <i>Fbxl6</i>        | 2.8  | 3.81 | 3.23 | 2.91 |
| ENSMUSG00000022560 | <i>Gpr172b</i>      | 1.5  | 2.17 | 2.27 | 1.88 |
| ENSMUSG00000022561 | <i>Gpaal</i>        | 3.86 | 4.5  | 3.82 | 3.8  |
| ENSMUSG00000022562 | <i>Oplah</i>        | 5.24 | 5.75 | 5.53 | 5.29 |
| ENSMUSG00000022564 | <i>Grina</i>        | 6.44 | 7.07 | 6.75 | 6.57 |
| ENSMUSG00000022565 | <i>Plecl</i>        | 2.27 | 2.9  | 2.79 | 2.68 |
| ENSMUSG00000022568 | <i>Scrib</i>        | 2.39 | 3.42 | 2.85 | 2.75 |
| ENSMUSG00000022570 | <i>Tsta3</i>        | 4.33 | 4.74 | 4.38 | 3.98 |
| ENSMUSG00000022571 | <i>Pycrl</i>        | 4.22 | 4.65 | 4.64 | 4.62 |

|                    |                     |      |      |      |       |
|--------------------|---------------------|------|------|------|-------|
| ENSMUSG00000022574 | <i>Naprt1</i>       | 5.92 | 6.55 | 6.19 | 6.15  |
| ENSMUSG00000022575 | <i>Gsdmdc1</i>      | 4.2  | 4.11 | 3.96 | 3.55  |
| ENSMUSG00000022579 | <i>Gpihbp1</i>      | 4.23 | 4.99 | 4.61 | 4.57  |
| ENSMUSG00000022587 | <i>Ly6e</i>         | 8.52 | 8.62 | 8.8  | 8.37  |
| ENSMUSG00000022591 | <i>NA</i>           | 3.24 | 3.16 | 2.95 | 2.84  |
| ENSMUSG00000022607 | <i>Ptk2</i>         | 2.81 | 2.92 | 2.7  | 2.48  |
| ENSMUSG00000022610 | <i>Mapk12</i>       | 0.68 | 1.11 | 1.23 | -0.14 |
| ENSMUSG00000022614 | <i>Tmem112b</i>     | 3.86 | 4.56 | 4.18 | 4.15  |
| ENSMUSG00000022615 | <i>Ecgf1</i>        | 6.29 | 6.98 | 6.56 | 6.29  |
| ENSMUSG00000022617 | <i>Chkb</i>         | 4.26 | 4.4  | 4.34 | 4.04  |
| ENSMUSG00000022620 | <i>Arsa</i>         | 2.54 | 3.1  | 3.23 | 3.19  |
| ENSMUSG00000022629 | <i>Kif21a</i>       | 4.05 | 3.24 | 3.67 | 3.46  |
| ENSMUSG00000022634 | <i>YAF2</i>         | 3.46 | 2.84 | 3.12 | 2.55  |
| ENSMUSG00000022635 | <i>Zcrb1</i>        | 4.36 | 3.79 | 3.9  | 3.56  |
| ENSMUSG00000022636 | <i>Alcam</i>        | 3.38 | 3.21 | 3.17 | 3.1   |
| ENSMUSG00000022637 | <i>Cblb</i>         | 1.5  | 1.17 | 1.53 | 1.44  |
| ENSMUSG00000022656 | <i>Pvrl3</i>        | 4.76 | 4.53 | 4.47 | 4.22  |
| ENSMUSG00000022663 | <i>Atg3</i>         | 6.06 | 5.96 | 5.89 | 5.55  |
| ENSMUSG00000022664 | <i>Slc35a5</i>      | 2.67 | 1.65 | 2.77 | 2.32  |
| ENSMUSG00000022665 | <i>Ccdc80</i>       | 2.55 | 2.72 | 2.17 | 2.39  |
| ENSMUSG00000022668 | <i>Gtpbp8</i>       | 3.02 | 2.16 | 3.08 | 2.15  |
| ENSMUSG00000022671 | <i>2410018G20Ri</i> | 3.57 | 3.77 | 4.44 | 4.28  |
| ENSMUSG00000022673 | <i>Mcm4</i>         | 1.12 | 0.4  | 1.12 | 0.56  |
| ENSMUSG00000022676 | <i>Snai2</i>        | 2.49 | 1.76 | 2.84 | 2.2   |
| ENSMUSG00000022677 | <i>0610037P05Ri</i> | 3.97 | 3.36 | 4.01 | 3.71  |
| ENSMUSG00000022678 | <i>Ndel</i>         | 2.93 | 3.23 | 3.36 | 2.95  |
| ENSMUSG00000022679 | <i>Mpv17l</i>       | 3.81 | 2.76 | 3.45 | 2.39  |
| ENSMUSG00000022680 | <i>Pdxdc1</i>       | 4.9  | 5.08 | 4.79 | 4.64  |
| ENSMUSG00000022681 | <i>Ntan1</i>        | 4.71 | 4.52 | 4.58 | 4.39  |
| ENSMUSG00000022682 | <i>Rrn3</i>         | 3.3  | 3.08 | 3.12 | 3.16  |
| ENSMUSG00000022684 | <i>Bfar</i>         | 4.94 | 4.88 | 5.11 | 4.77  |



|                    |                     |      |      |      |      |
|--------------------|---------------------|------|------|------|------|
| ENSMUSG00000022685 | <i>Parn</i>         | 2.94 | 2.83 | 2.88 | 2.86 |
| ENSMUSG00000022698 | <i>Nat13</i>        | 5.55 | 4.75 | 5.06 | 4.75 |
| ENSMUSG00000022702 | <i>Hira</i>         | 2.23 | 2.45 | 2.23 | 2.05 |
| ENSMUSG00000022704 | <i>Qtrtd1</i>       | 1.23 | 1.06 | 1.05 | 1.13 |
| ENSMUSG00000022706 | <i>Mrpl40</i>       | 5.11 | 4.3  | 4.8  | 4.58 |
| ENSMUSG00000022707 | <i>Gbe1</i>         | 5.81 | 4.68 | 5.47 | 5.22 |
| ENSMUSG00000022708 | <i>Zbtb20</i>       | 3.14 | 3.71 | 2.69 | 2.38 |
| ENSMUSG00000022710 | <i>Hausp</i>        | 4.67 | 4.1  | 4.31 | 4.03 |
| ENSMUSG00000022711 | <i>Pmm2</i>         | 5.36 | 5.48 | 5.48 | 5.22 |
| ENSMUSG00000022718 | <i>Dgcr8</i>        | 1.95 | 1.47 | 1.67 | 1.31 |
| ENSMUSG00000022721 | <i>Htf9c</i>        | 2.42 | 2.72 | 2.2  | 2.42 |
| ENSMUSG00000022722 | <i>Arl6</i>         | 1.87 | 0.91 | 1.75 | 1.59 |
| ENSMUSG00000022723 | <i>BC043118</i>     | 1.42 | 1.42 | 0.97 | 1.39 |
| ENSMUSG00000022724 | <i>Mina</i>         | 2.04 | 1.84 | 2.37 | 1.86 |
| ENSMUSG00000022742 | <i>Cpox</i>         | 6.93 | 6.29 | 6.99 | 6.41 |
| ENSMUSG00000022744 | <i>Cldnd1</i>       | 4.35 | 3.83 | 4.31 | 3.88 |
| ENSMUSG00000022747 | <i>St3gal6</i>      | 2.98 | 1.65 | 2.79 | 1.6  |
| ENSMUSG00000022748 | <i>2610528E23Ri</i> | 1.42 | 1.81 | 1.58 | 1.59 |
| ENSMUSG00000022749 | <i>Tbc1d23</i>      | 3.45 | 2.41 | 3.17 | 2.45 |
| ENSMUSG00000022750 | <i>Klhl22</i>       | 2.62 | 2.93 | 2.81 | 2.56 |
| ENSMUSG00000022751 | <i>Nit2</i>         | 7.57 | 6.53 | 7.15 | 6.89 |
| ENSMUSG00000022752 | <i>Tomm70a</i>      | 5.26 | 4.63 | 4.95 | 4.35 |
| ENSMUSG00000022757 | <i>Tfg</i>          | 5.54 | 5.09 | 5.17 | 5.03 |
| ENSMUSG00000022760 | <i>Thap7</i>        | 2.76 | 3.83 | 3.69 | 3.71 |
| ENSMUSG00000022761 | <i>Lztr1</i>        | 3.45 | 3.92 | 3.79 | 3.59 |
| ENSMUSG00000022765 | <i>Snap29</i>       | 4.22 | 3.92 | 3.94 | 3.79 |
| ENSMUSG00000022766 | <i>Serpind1</i>     | 8.65 | 8.71 | 8.62 | 8.43 |
| ENSMUSG00000022769 | <i>Sdf2l1</i>       | 4.18 | 5.26 | 3.79 | 4.1  |
| ENSMUSG00000022770 | <i>Dlg1</i>         | 4.2  | 3.21 | 3.87 | 3.41 |
| ENSMUSG00000022771 | <i>Ppil2</i>        | 3.69 | 3.53 | 3.56 | 3.5  |
| ENSMUSG00000022772 | <i>Senp5</i>        | 3.04 | 2.17 | 2.43 | 2.19 |

|                    |               |      |      |      |      |
|--------------------|---------------|------|------|------|------|
| ENSMUSG00000022774 | <i>Ncbp2</i>  | 4.01 | 3.32 | 3.94 | 3.67 |
| ENSMUSG00000022779 | <i>Top3b</i>  | 2.65 | 2.63 | 2.6  | 2.09 |
| ENSMUSG00000022781 | <i>Pak2</i>   | 4.03 | 3.28 | 3.75 | 3.37 |
| ENSMUSG00000022787 | <i>Wdr53</i>  | 2.24 | 2.18 | 2.39 | 2.27 |
| ENSMUSG00000022788 | <i>Fgd4</i>   | 1.53 | 0.69 | 1.8  | 1.17 |
| ENSMUSG00000022789 | <i>Drp1</i>   | 4.38 | 3.48 | 3.98 | 3.38 |
| ENSMUSG00000022790 | <i>Igsf11</i> | 4.34 | 3.42 | 3.75 | 3.09 |
| ENSMUSG00000022791 | <i>Tnk2</i>   | 2.48 | 3.35 | 2.47 | 2.41 |
| ENSMUSG00000022792 | <i>Yars2</i>  | 3.6  | 3.78 | 3.71 | 3.44 |
| ENSMUSG00000022797 | <i>Tfrc</i>   | 2.41 | 3.29 | 1.61 | 1.25 |
| ENSMUSG00000022799 | <i>Cdgap</i>  | 1.33 | 1.42 | 0.68 | 0.86 |
| ENSMUSG00000022800 | <i>Fyttd1</i> | 3.8  | 2.45 | 3.37 | 2.69 |
| ENSMUSG00000022801 | <i>Lrch3</i>  | 1.9  | 1.39 | 1.73 | 1.32 |
| ENSMUSG00000022807 | <i>Osbp11</i> | 3.7  | 2.96 | 3.04 | 2.95 |
| ENSMUSG00000022808 | <i>Snx4</i>   | 3.68 | 2.82 | 3.38 | 2.94 |
| ENSMUSG00000022809 | <i>Nr1i2</i>  | 6.13 | 6.16 | 5.66 | 5.38 |
| ENSMUSG00000022811 | <i>Zfp148</i> | 3.32 | 2.68 | 2.85 | 2.71 |
| ENSMUSG00000022812 | <i>Gsk3b</i>  | 3.43 | 2.84 | 3.48 | 3.02 |
| ENSMUSG00000022814 | <i>Umps</i>   | 4.83 | 4.44 | 4.79 | 4.69 |
| ENSMUSG00000022816 | <i>Fstl1</i>  | 1.16 | 0.85 | 1.12 | 0.53 |
| ENSMUSG00000022817 | <i>Itgb5</i>  | 4.62 | 5.04 | 4.59 | 4.49 |
| ENSMUSG00000022820 | <i>Ndufb4</i> | 5.48 | 2.8  | 3.9  | 3.01 |
| ENSMUSG00000022821 | <i>Hgd</i>    | 9.11 | 8.99 | 9.22 | 8.73 |
| ENSMUSG00000022827 | <i>Rabl3</i>  | 3.91 | 3.51 | 3.93 | 3.7  |
| ENSMUSG00000022828 | <i>Gtf2e1</i> | 2.83 | 2.72 | 2.7  | 2.37 |
| ENSMUSG00000022831 | <i>Hcls1</i>  | 1.32 | 1.75 | 1.8  | 1.35 |
| ENSMUSG00000022836 | <i>Mlyk</i>   | 3.89 | 4.07 | 3.98 | 3.96 |
| ENSMUSG00000022841 | <i>Ap2m1</i>  | 2.7  | 2.83 | 2.36 | 2.12 |
| ENSMUSG00000022842 | <i>Ece2</i>   | 0.93 | 1.45 | 1.33 | 1.23 |
| ENSMUSG00000022843 | <i>Clcn2</i>  | 3.94 | 4.68 | 4.14 | 3.87 |
| ENSMUSG00000022844 | <i>Pdia5</i>  | 4.84 | 5.66 | 4.83 | 5.04 |

|                    |                   |       |       |       |       |
|--------------------|-------------------|-------|-------|-------|-------|
| ENSMUSG00000022847 | <i>Thpo</i>       | 2.94  | 3.44  | 3.08  | 2.94  |
| ENSMUSG00000022848 | <i>Dirc2</i>      | 3.99  | 4.01  | 3.82  | 3.7   |
| ENSMUSG00000022853 | <i>Ehhadh</i>     | 7.93  | 7.5   | 7.53  | 7.49  |
| ENSMUSG00000022855 | <i>Senp2</i>      | 3.53  | 3.21  | 3.46  | 3.42  |
| ENSMUSG00000022856 | <i>Tmem41a</i>    | 3.36  | 3.87  | 4.02  | 3.7   |
| ENSMUSG00000022858 | <i>Sfrs10</i>     | 1.68  | 1.55  | 1.34  | 1.68  |
| ENSMUSG00000022864 | <i>D16Ert472e</i> | 1.89  | 0.87  | 1.14  | 1.12  |
| ENSMUSG00000022865 | <i>Cxadr</i>      | 4.26  | 2.93  | 3.8   | 3.34  |
| ENSMUSG00000022867 | <i>Usp25</i>      | 3.8   | 3.05  | 3.58  | 3.41  |
| ENSMUSG00000022868 | <i>Ahsg</i>       | 12.12 | 12.17 | 12.09 | 12.21 |
| ENSMUSG00000022871 | <i>Fetub</i>      | 8.81  | 9.32  | 9.17  | 9.25  |
| ENSMUSG00000022875 | <i>Kngr1</i>      | 9.93  | 9.46  | 9.47  | 9.46  |
| ENSMUSG00000022877 | <i>Hrg</i>        | 9.7   | 9.68  | 10    | 9.83  |
| ENSMUSG00000022881 | <i>Rfc4</i>       | 1.12  | 0.48  | 1.66  | 1.48  |
| ENSMUSG00000022884 | <i>Eif4a2</i>     | 6.69  | 5.74  | 6.49  | 5.85  |
| ENSMUSG00000022885 | <i>St6gal1</i>    | 5.63  | 5.59  | 5.31  | 5.1   |
| ENSMUSG00000022887 | <i>Masp1</i>      | 5.65  | 5.19  | 5.28  | 5.05  |
| ENSMUSG00000022889 | <i>Mrpl39</i>     | 4.78  | 4.53  | 4.78  | 4.43  |
| ENSMUSG00000022890 | <i>Atp5j</i>      | 7.1   | 6.58  | 7.05  | 6.53  |
| ENSMUSG00000022892 | <i>App</i>        | 5     | 5.24  | 4.79  | 4.92  |
| ENSMUSG00000022893 | <i>Adamts1</i>    | 1.85  | 1.31  | 1.61  | 1.44  |
| ENSMUSG00000022895 | <i>Ets2</i>       | 3.63  | 3.77  | 3.41  | 3.32  |
| ENSMUSG00000022897 | <i>Dyrk1a</i>     | 3.17  | 2.66  | 3.18  | 2.88  |
| ENSMUSG00000022898 | <i>Dscr3</i>      | 4.04  | 4.16  | 3.95  | 3.49  |
| ENSMUSG00000022905 | <i>Kpna1</i>      | 4.63  | 4.14  | 4.34  | 3.92  |
| ENSMUSG00000022906 | <i>Parp9</i>      | 4.52  | 3.34  | 4.18  | 4.11  |
| ENSMUSG00000022911 | <i>Arl13b</i>     | 1.88  | 1.48  | 1.26  | 0.39  |
| ENSMUSG00000022912 | <i>Prosl</i>      | 4.7   | 4.03  | 4.1   | 3.84  |
| ENSMUSG00000022913 | <i>Dscr2</i>      | 4.57  | 4.69  | 4.41  | 4.45  |
| ENSMUSG00000022914 | <i>Brwd1</i>      | 1.62  | 1.17  | 1.44  | 1.1   |
| ENSMUSG00000022940 | <i>Pigp</i>       | 2.32  | 0.21  | 1.57  | 0.64  |

|                    |                     |      |      |      |      |
|--------------------|---------------------|------|------|------|------|
| ENSMUSG00000022946 | <i>Dopey2</i>       | 3.2  | 2.65 | 3.77 | 2.52 |
| ENSMUSG00000022951 | <i>Rcan1</i>        | 4.03 | 3.85 | 3.6  | 4    |
| ENSMUSG00000022956 | <i>Atp5o</i>        | 5.73 | 4.47 | 5.38 | 5.26 |
| ENSMUSG00000022957 | <i>Itsn1</i>        | 1.47 | 1.19 | 1.36 | 0.98 |
| ENSMUSG00000022961 | <i>mKIAA1019</i>    | 4.72 | 4.55 | 4.64 | 4.34 |
| ENSMUSG00000022962 | <i>Gart</i>         | 3.6  | 4    | 3.54 | 3.69 |
| ENSMUSG00000022964 | <i>Tmem50b</i>      | 2.25 | 2.69 | 2.23 | 1.92 |
| ENSMUSG00000022965 | <i>Ifngr2</i>       | 3.15 | 3.43 | 3.63 | 3.35 |
| ENSMUSG00000022967 | <i>Ifnar1</i>       | 4.01 | 3.97 | 3.83 | 3.53 |
| ENSMUSG00000022969 | <i>Il10rb</i>       | 2.38 | 2.77 | 2.67 | 2.34 |
| ENSMUSG00000022971 | <i>Ifnar2</i>       | 5.46 | 4.92 | 5.19 | 4.86 |
| ENSMUSG00000022972 | <i>1110004E09Ri</i> | 3.42 | 3.64 | 3.44 | 3.48 |
| ENSMUSG00000022973 | <i>NA</i>           | 1.77 | 1.19 | 1.65 | 1.25 |
| ENSMUSG00000022974 | <i>NA</i>           | 2.36 | 1.79 | 2.32 | 1.99 |
| ENSMUSG00000022978 | <i>2610039C10Ri</i> | 1.28 | 1.15 | 1.76 | 1.1  |
| ENSMUSG00000022982 | <i>Sod1</i>         | 7.28 | 7.58 | 7.44 | 7.27 |
| ENSMUSG00000022983 | <i>Sfrs15</i>       | 2.55 | 2.52 | 2.87 | 2.72 |
| ENSMUSG00000022994 | <i>Adcy6</i>        | 1.9  | 2.12 | 2.36 | 2.06 |
| ENSMUSG00000022999 | <i>Lmbr1l</i>       | 1.97 | 2.42 | 2.25 | 1.66 |
| ENSMUSG00000023004 | <i>Tuba1b</i>       | 1.48 | 1.24 | 1.37 | 1.33 |
| ENSMUSG00000023007 | <i>Hypc</i>         | 1.69 | 2    | 1.86 | 1.49 |
| ENSMUSG00000023010 | <i>Tegt</i>         | 9.47 | 9.67 | 9.43 | 9.28 |
| ENSMUSG00000023018 | <i>Smardc1</i>      | 1.54 | 2.54 | 1.52 | 1.03 |
| ENSMUSG00000023019 | <i>Gpd1</i>         | 7.41 | 7.82 | 7.59 | 7.58 |
| ENSMUSG00000023020 | <i>2310016M24R</i>  | 4.87 | 5.07 | 4.84 | 5.03 |
| ENSMUSG00000023022 | <i>Limal</i>        | 4.12 | 3.73 | 3.83 | 4.13 |
| ENSMUSG00000023025 | <i>D330037H05R</i>  | 3.71 | 2.27 | 3.03 | 2.64 |
| ENSMUSG00000023027 | <i>Atf1</i>         | 2.91 | 2.41 | 2.89 | 2.57 |
| ENSMUSG00000023030 | <i>Slc11a2</i>      | 2.5  | 2.83 | 2.77 | 2.08 |
| ENSMUSG00000023031 | <i>Ela1</i>         | 3.28 | 3.82 | 3.09 | 3.55 |
| ENSMUSG00000023043 | <i>Krt18</i>        | 6.04 | 6.63 | 6.33 | 6.12 |

|                    |                     |       |      |      |      |
|--------------------|---------------------|-------|------|------|------|
| ENSMUSG00000023044 | <i>Csad</i>         | 4.27  | 6.5  | 5.01 | 5.4  |
| ENSMUSG00000023045 | <i>Soat2</i>        | 3.28  | 4.39 | 3.83 | 3.92 |
| ENSMUSG00000023048 | <i>Prr13</i>        | 5.01  | 5.41 | 5.81 | 5.81 |
| ENSMUSG00000023050 | <i>Map3k12</i>      | 4     | 3.74 | 4.18 | 3.8  |
| ENSMUSG00000023051 | <i>Tarbp2</i>       | 1.62  | 1.99 | 1.73 | 1.05 |
| ENSMUSG00000023055 | <i>Calcocol</i>     | 4.01  | 3.9  | 4.72 | 4.36 |
| ENSMUSG00000023057 | <i>Fabp2</i>        | 6.14  | 5.27 | 5.8  | 5.1  |
| ENSMUSG00000023067 | <i>Cdkn1a</i>       | 5.91  | 6.58 | 3.89 | 3.38 |
| ENSMUSG00000023068 | <i>Nus1</i>         | 4.51  | 4.6  | 4.25 | 4.08 |
| ENSMUSG00000023070 | <i>Rgn</i>          | 10.06 | 9.05 | 9.55 | 9.18 |
| ENSMUSG00000023072 | <i>Ccdc123</i>      | 1.84  | 1.82 | 1.51 | 1.54 |
| ENSMUSG00000023073 | <i>Slc10a2</i>      | 4.62  | 3.84 | 3.62 | 4.02 |
| ENSMUSG00000023074 | <i>Mospd1</i>       | 2.26  | 1.41 | 2.81 | 1.98 |
| ENSMUSG00000023075 | <i>6330407G11Ri</i> | 2.63  | 2.27 | 2.5  | 2.66 |
| ENSMUSG00000023078 | <i>Cxcl13</i>       | 2.01  | 0.2  | 2.47 | 0.9  |
| ENSMUSG00000023079 | <i>Gtf2ird1</i>     | 1.8   | 2.42 | 2.14 | 1.93 |
| ENSMUSG00000023084 | <i>NA</i>           | 1.87  | 2.13 | 2.27 | 1.94 |
| ENSMUSG00000023087 | <i>Ccrn4l</i>       | 3.9   | 3.93 | 4.62 | 5.08 |
| ENSMUSG00000023089 | <i>Ndufa5</i>       | 6.51  | 6.06 | 6.74 | 6.2  |
| ENSMUSG00000023092 | <i>Fhl1</i>         | 2.14  | 1.53 | 2.29 | 1.97 |
| ENSMUSG00000023094 | <i>Msrb2</i>        | 3.57  | 3.32 | 3.59 | 3.31 |
| ENSMUSG00000023104 | <i>Rfc2</i>         | 3.56  | 4.14 | 3.83 | 3.72 |
| ENSMUSG00000023106 | <i>Denr</i>         | 5.46  | 4.97 | 5.03 | 4.53 |
| ENSMUSG00000023110 | <i>Prmt5</i>        | 3.13  | 3.68 | 3.27 | 3.16 |
| ENSMUSG00000023118 | <i>NA</i>           | 4.07  | 4.78 | 4.57 | 4.38 |
| ENSMUSG00000023122 | <i>Sult1c2</i>      | 3.33  | 2.36 | 3.49 | 2.79 |
| ENSMUSG00000023143 | <i>Nagpa</i>        | 3.19  | 4.13 | 3.68 | 3.57 |
| ENSMUSG00000023147 | <i>Wrb</i>          | 1.19  | 0.76 | 1.1  | 1    |
| ENSMUSG00000023150 | <i>Ivns1abp</i>     | 5.63  | 5.15 | 5.29 | 4.81 |
| ENSMUSG00000023156 | <i>Rpp14</i>        | 3.34  | 2.81 | 3    | 2.96 |
| ENSMUSG00000023170 | <i>Gps2</i>         | 3.57  | 4.03 | 4.18 | 4.06 |

|                    |                     |       |      |      |       |
|--------------------|---------------------|-------|------|------|-------|
| ENSMUSG00000023175 | <i>Bsg</i>          | 8.19  | 8.55 | 8.6  | 8.35  |
| ENSMUSG00000023176 | <i>Cpn2</i>         | 7.15  | 7.81 | 7.21 | 7.17  |
| ENSMUSG00000023186 | <i>Loh11cr2a</i>    | 3.51  | 3    | 3.06 | 2.87  |
| ENSMUSG00000023206 | <i>Il15ra</i>       | 3.41  | 3.55 | 3.5  | 2.71  |
| ENSMUSG00000023224 | <i>Serping1</i>     | 8.89  | 9.26 | 9    | 9.03  |
| ENSMUSG00000023232 | <i>Serinc2</i>      | -0.12 | 1.29 | 2.12 | -0.16 |
| ENSMUSG00000023243 | <i>Kcnk5</i>        | 3.79  | 5.11 | 4.84 | 4.64  |
| ENSMUSG00000023249 | <i>Parp3</i>        | 3.25  | 3.58 | 3.07 | 3.09  |
| ENSMUSG00000023262 | <i>Acy1</i>         | 5.31  | 5.77 | 5.76 | 5.53  |
| ENSMUSG00000023272 | <i>Creld2</i>       | 4.68  | 5.67 | 3.59 | 4.28  |
| ENSMUSG00000023277 | <i>Twf2</i>         | 1.29  | 1.8  | 1.65 | 0.96  |
| ENSMUSG00000023286 | <i>Ube2j2</i>       | 0.99  | 1.07 | 1.39 | 0.8   |
| ENSMUSG00000023307 | <i>5-Mar</i>        | 5.16  | 4.46 | 4.98 | 4.56  |
| ENSMUSG00000023330 | <i>Dtwd1</i>        | 2.63  | 2.45 | 2.64 | 2.55  |
| ENSMUSG00000023336 | <i>Wfdc1</i>        | 2.43  | 2.1  | 2.17 | 1.94  |
| ENSMUSG00000023341 | <i>Mx2</i>          | 1.89  | 1.15 | 0.88 | 1.27  |
| ENSMUSG00000023348 | <i>Trip6</i>        | 2.69  | 3.39 | 2.91 | 2.68  |
| ENSMUSG00000023349 | <i>Clec4n</i>       | 1.11  | 0.34 | 1.58 | 0.47  |
| ENSMUSG00000023353 | <i>Centg3</i>       | 3.18  | 4.08 | 3.62 | 3.49  |
| ENSMUSG00000023367 | <i>Tmem176a</i>     | 7.55  | 7.81 | 7.58 | 7.43  |
| ENSMUSG00000023393 | <i>I700019H03R4</i> | 1.3   | 1.68 | 1.07 | 0.92  |
| ENSMUSG00000023452 | <i>Pisd</i>         | 4.06  | 4.26 | 4.21 | 3.75  |
| ENSMUSG00000023456 | <i>Tpi1</i>         | 7.24  | 7.45 | 7.31 | 7.07  |
| ENSMUSG00000023460 | <i>Rab12</i>        | 4.25  | 4.04 | 4.16 | 3.96  |
| ENSMUSG00000023495 | <i>Pcbp4</i>        | 2.93  | 3.63 | 3.36 | 3.61  |
| ENSMUSG00000023572 | <i>Ccndbp1</i>      | 3.5   | 3.7  | 3.69 | 3.68  |
| ENSMUSG00000023707 | <i>Ogfod2</i>       | 3.41  | 4.04 | 3.68 | 3.46  |
| ENSMUSG00000023723 | <i>Mrps23</i>       | 4.36  | 4.47 | 4.49 | 4.35  |
| ENSMUSG00000023764 | <i>Sfil</i>         | 1.69  | 1.54 | 2.35 | 1.69  |
| ENSMUSG00000023791 | <i>Pigx</i>         | 3.75  | 3.79 | 4.48 | 4.05  |
| ENSMUSG00000023795 | <i>NA</i>           | 1.66  | 1.92 | 1.58 | 1.15  |

|                    |                  |      |      |      |      |
|--------------------|------------------|------|------|------|------|
| ENSMUSG00000023826 | <i>Park2</i>     | 2.16 | 0.94 | 1.75 | 1.31 |
| ENSMUSG00000023828 | <i>Slc22a3</i>   | 1.51 | 0.64 | 1.57 | 0.62 |
| ENSMUSG00000023829 | <i>Slc22a1</i>   | 7.78 | 7.89 | 7.59 | 7.57 |
| ENSMUSG00000023830 | <i>Igf2r</i>     | 2.61 | 3.02 | 3.11 | 2.77 |
| ENSMUSG00000023832 | <i>Acat2</i>     | 4.8  | 4.63 | 4.23 | 3.94 |
| ENSMUSG00000023845 | <i>Lnpep</i>     | 2.48 | 1.29 | 1.97 | 1.5  |
| ENSMUSG00000023846 | <i>Riok2</i>     | 3.53 | 3.2  | 3.2  | 3.4  |
| ENSMUSG00000023852 | <i>Chd1</i>      | 3.27 | 2.74 | 3.22 | 2.86 |
| ENSMUSG00000023861 | <i>Brp44l</i>    | 2.62 | 2.77 | 3.05 | 3.08 |
| ENSMUSG00000023883 | <i>Phf10</i>     | 4.07 | 3.68 | 3.84 | 3.3  |
| ENSMUSG00000023892 | <i>Zfp51</i>     | 1.71 | 0.98 | 0.91 | 0.3  |
| ENSMUSG00000023904 | <i>Hcfc1r1</i>   | 5.58 | 5.84 | 6.46 | 6.64 |
| ENSMUSG00000023905 | <i>Tnfrsf12a</i> | 2.37 | 2.77 | 2.71 | 2.58 |
| ENSMUSG00000023913 | <i>Pla2g7</i>    | 3.74 | 3.25 | 3.86 | 3.32 |
| ENSMUSG00000023915 | <i>Tnfrsf21</i>  | 1.4  | 2.05 | 2.01 | 1.8  |
| ENSMUSG00000023919 | <i>Cenpq</i>     | 2.36 | 1.23 | 2.29 | 1.15 |
| ENSMUSG00000023921 | <i>Mut</i>       | 6.85 | 6.37 | 6.65 | 6.2  |
| ENSMUSG00000023923 | <i>Tbcld5</i>    | 2.28 | 2.4  | 2.5  | 2.29 |
| ENSMUSG00000023932 | <i>Cdc5l</i>     | 1.64 | 1.18 | 1.71 | 1.4  |
| ENSMUSG00000023938 | <i>Aars2</i>     | 2.45 | 3.33 | 2.86 | 2.65 |
| ENSMUSG00000023939 | <i>Mrpl14</i>    | 5.51 | 5.99 | 5.62 | 6.05 |
| ENSMUSG00000023942 | <i>Slc29a1</i>   | 7.51 | 7.66 | 7.5  | 7.49 |
| ENSMUSG00000023944 | <i>Hsp90ab1</i>  | 9.03 | 9.35 | 9.1  | 9.17 |
| ENSMUSG00000023951 | <i>Vegfa</i>     | 4.37 | 4.69 | 4.67 | 4.43 |
| ENSMUSG00000023952 | <i>Gtpbp2</i>    | 2.73 | 3.35 | 2.93 | 2.75 |
| ENSMUSG00000023960 | <i>Enpp5</i>     | 3.18 | 2.71 | 2.94 | 2.73 |
| ENSMUSG00000023961 | <i>Enpp4</i>     | 3.15 | 2.43 | 2.58 | 2.45 |
| ENSMUSG00000023963 | <i>Cyp39a1</i>   | 5.88 | 5.13 | 6.01 | 5.41 |
| ENSMUSG00000023965 | <i>NA</i>        | 3.5  | 3.4  | 3.06 | 2.87 |
| ENSMUSG00000023967 | <i>Mrps18a</i>   | 4.91 | 5.5  | 5.11 | 5.16 |
| ENSMUSG00000023971 | <i>BC011248</i>  | 3.6  | 4.23 | 4.19 | 4.04 |

|                    |                    |      |      |      |      |
|--------------------|--------------------|------|------|------|------|
| ENSMUSG00000023973 | <i>Tnrc5</i>       | 4.75 | 5.6  | 4.95 | 5.04 |
| ENSMUSG00000023977 | <i>Ubr2</i>        | 4.25 | 4.09 | 4.4  | 4.08 |
| ENSMUSG00000023980 | <i>Taf8</i>        | 1.79 | 2.51 | 2.16 | 2.1  |
| ENSMUSG00000023982 | <i>Guc1a</i>       | 0.69 | 1.18 | 1.14 | 1.48 |
| ENSMUSG00000023988 | <i>Bysl</i>        | 3.06 | 4.35 | 3.43 | 3.51 |
| ENSMUSG00000023990 | <i>Tcfef</i>       | 1.04 | 1.94 | 1.92 | 1.78 |
| ENSMUSG00000023991 | <i>Foxp4</i>       | 2.53 | 3.28 | 3.32 | 3.22 |
| ENSMUSG00000023994 | <i>Nfya</i>        | 2.33 | 2.43 | 2.33 | 2.08 |
| ENSMUSG00000024002 | <i>Brd4</i>        | 3.5  | 3.45 | 3.59 | 3.55 |
| ENSMUSG00000024006 | <i>Stk38</i>       | 4.4  | 4.19 | 4.42 | 4.09 |
| ENSMUSG00000024007 | <i>Ppil1</i>       | 2.33 | 3.79 | 2.98 | 2.58 |
| ENSMUSG00000024012 | <i>AK189748</i>    | 5.69 | 6.42 | 5.85 | 5.81 |
| ENSMUSG00000024014 | <i>Pim1</i>        | 1.66 | 2.66 | 2.03 | 1.37 |
| ENSMUSG00000024018 | <i>NA</i>          | 2.91 | 3.02 | 2.76 | 2.89 |
| ENSMUSG00000024019 | <i>Rnf8</i>        | 3.48 | 3.56 | 3.41 | 3.27 |
| ENSMUSG00000024026 | <i>Glo1</i>        | 7.12 | 7.12 | 6.8  | 6.76 |
| ENSMUSG00000024030 | <i>Abcg1</i>       | 1.46 | 1.41 | 1.05 | 0.83 |
| ENSMUSG00000024037 | <i>wdr4</i>        | 1.76 | 2.5  | 1.98 | 1.95 |
| ENSMUSG00000024038 | <i>1500032D16R</i> | 5.74 | 5.86 | 6.54 | 6.2  |
| ENSMUSG00000024039 | <i>Cbs</i>         | 8.39 | 8.97 | 8.4  | 8.18 |
| ENSMUSG00000024042 | <i>Snf1lk</i>      | 1.99 | 2.59 | 2.73 | 2.38 |
| ENSMUSG00000024045 | <i>Akap8</i>       | 3.54 | 3.01 | 3.46 | 3.01 |
| ENSMUSG00000024048 | <i>2900073G15R</i> | 5.4  | 5.27 | 5.61 | 5.41 |
| ENSMUSG00000024050 | <i>Wiz</i>         | 2.1  | 2.74 | 2.56 | 2.55 |
| ENSMUSG00000024052 | <i>Lpin2</i>       | 6.23 | 5.55 | 6.32 | 6.19 |
| ENSMUSG00000024054 | <i>Smchd1</i>      | 2.04 | 1.41 | 1.89 | 1.43 |
| ENSMUSG00000024055 | <i>Cyp4f13</i>     | 5.43 | 5.85 | 5.65 | 5.61 |
| ENSMUSG00000024063 | <i>Lbh</i>         | 1.92 | 2.04 | 1.35 | 1.09 |
| ENSMUSG00000024065 | <i>Ehd3</i>        | 5.41 | 6.29 | 5.23 | 5.43 |
| ENSMUSG00000024066 | <i>Xdh</i>         | 4.99 | 5.27 | 4.99 | 5.18 |
| ENSMUSG00000024067 | <i>2810410M20R</i> | 5.15 | 4.29 | 4.66 | 4.29 |



|                    |                     |      |      |      |      |
|--------------------|---------------------|------|------|------|------|
| ENSMUSG00000024068 | <i>Spast</i>        | 4.2  | 3.09 | 3.85 | 3.06 |
| ENSMUSG00000024069 | <i>Slc30a6</i>      | 3.01 | 3.31 | 3.31 | 2.89 |
| ENSMUSG00000024070 | <i>Prkcn</i>        | 4.59 | 4.75 | 5.09 | 4.97 |
| ENSMUSG00000024072 | <i>Yipf4</i>        | 4.32 | 3.87 | 4.31 | 3.79 |
| ENSMUSG00000024073 | <i>Birc6</i>        | 3.19 | 2.87 | 3.18 | 2.84 |
| ENSMUSG00000024074 | <i>Crim1</i>        | 1.35 | 1.97 | 1.57 | 1.83 |
| ENSMUSG00000024077 | <i>Strn</i>         | 1.59 | 1.53 | 1.25 | 1.51 |
| ENSMUSG00000024078 | <i>Ttc27</i>        | 2.3  | 2.64 | 2.42 | 2.24 |
| ENSMUSG00000024079 | <i>Eif2ak2</i>      | 3.29 | 2.13 | 2.49 | 2.27 |
| ENSMUSG00000024081 | <i>Cebpz</i>        | 4.14 | 4.32 | 4.07 | 3.77 |
| ENSMUSG00000024082 | <i>2410091C18Ri</i> | 3.3  | 3.46 | 3.33 | 3.31 |
| ENSMUSG00000024083 | <i>Pja2</i>         | 3.6  | 3.57 | 3.33 | 3.28 |
| ENSMUSG00000024084 | <i>Qpct</i>         | 2.37 | 3.41 | 2.23 | 2.7  |
| ENSMUSG00000024085 | <i>Man2a1</i>       | 6.61 | 5.67 | 6.44 | 5.9  |
| ENSMUSG00000024091 | <i>Vapa</i>         | 6.41 | 5.73 | 6.32 | 5.85 |
| ENSMUSG00000024095 | <i>Hnrpll</i>       | 3.94 | 3.82 | 3.96 | 3.89 |
| ENSMUSG00000024096 | <i>Ralbp1</i>       | 3.9  | 3.88 | 3.71 | 3.48 |
| ENSMUSG00000024097 | <i>Sfrs7</i>        | 3.72 | 3.71 | 3.71 | 3.45 |
| ENSMUSG00000024098 | <i>Twsg1</i>        | 4.76 | 4.14 | 4.32 | 3.98 |
| ENSMUSG00000024099 | <i>Ndufv2</i>       | 7.78 | 7.17 | 7.6  | 7.26 |
| ENSMUSG00000024101 | <i>ORF19</i>        | 3.06 | 3.29 | 3.57 | 3.05 |
| ENSMUSG00000024104 | <i>D6Wsu116e</i>    | 4.08 | 4.08 | 4.27 | 3.8  |
| ENSMUSG00000024118 | <i>1600002H07Ri</i> | 4.46 | 4.83 | 4.54 | 4.52 |
| ENSMUSG00000024120 | <i>Lrpprc</i>       | 5.07 | 4.8  | 5.37 | 4.97 |
| ENSMUSG00000024121 | <i>Atp6v0c</i>      | 2.38 | 1.64 | 2.44 | 2.31 |
| ENSMUSG00000024122 | <i>Pdpk1</i>        | 3.77 | 3.05 | 3.24 | 3.12 |
| ENSMUSG00000024127 | <i>Prepl</i>        | 4.63 | 4.86 | 4.75 | 4.65 |
| ENSMUSG00000024130 | <i>Abca3</i>        | 6.35 | 6.62 | 6.44 | 6.11 |
| ENSMUSG00000024131 | <i>Slc3a1</i>       | 5.59 | 5.95 | 5.65 | 5.55 |
| ENSMUSG00000024132 | <i>Dci</i>          | 7.21 | 7.48 | 7.45 | 7.24 |
| ENSMUSG00000024135 | <i>NA</i>           | 2.5  | 1.58 | 2.56 | 2.2  |

|                    |                    |       |       |      |       |
|--------------------|--------------------|-------|-------|------|-------|
| ENSMUSG00000024137 | <i>E4f1</i>        | 1.38  | 2.23  | 1.68 | 1.14  |
| ENSMUSG00000024140 | <i>Epas1</i>       | 5.9   | 6.43  | 6.1  | 5.99  |
| ENSMUSG00000024142 | <i>Gbl</i>         | 1.56  | 2.15  | 1.84 | 1.84  |
| ENSMUSG00000024143 | <i>Rhoq</i>        | 2.21  | 1.48  | 2.37 | 1.75  |
| ENSMUSG00000024145 | <i>Pigf</i>        | 3.3   | 2.88  | 3.12 | 2.68  |
| ENSMUSG00000024146 | <i>Cript</i>       | 5.81  | 5.02  | 5.84 | 5.2   |
| ENSMUSG00000024150 | <i>Mcf2</i>        | 7.36  | 7.42  | 7.25 | 7.09  |
| ENSMUSG00000024151 | <i>Msh2</i>        | 2.21  | 1.41  | 2.44 | 2.21  |
| ENSMUSG00000024155 | <i>NA</i>          | 4     | 2.39  | 3.5  | 2.44  |
| ENSMUSG00000024158 | <i>Hagh</i>        | 7.27  | 7.4   | 7.33 | 7.34  |
| ENSMUSG00000024160 | <i>Spsb3</i>       | 2.41  | 3.04  | 2.41 | 2.41  |
| ENSMUSG00000024163 | <i>Mapk8ip3</i>    | 1.35  | 2.1   | 1.32 | 1.47  |
| ENSMUSG00000024164 | <i>C3</i>          | 11.08 | 11.35 | 11.2 | 11.15 |
| ENSMUSG00000024165 | <i>Hn1l</i>        | 3.42  | 3.46  | 2.77 | 2.84  |
| ENSMUSG00000024168 | <i>BC054438</i>    | 3.4   | 4.05  | 3.29 | 3.15  |
| ENSMUSG00000024169 | <i>Ift140</i>      | 1.28  | 1.54  | 1.78 | 1.61  |
| ENSMUSG00000024180 | <i>Tmem8</i>       | 3.1   | 3.69  | 3.31 | 3.01  |
| ENSMUSG00000024181 | <i>Mrpl28</i>      | 5.46  | 5.75  | 5.61 | 5.49  |
| ENSMUSG00000024182 | <i>Axin1</i>       | 3.06  | 3.51  | 3.2  | 3.31  |
| ENSMUSG00000024187 | <i>Itfg3</i>       | 5.03  | 5.29  | 4.86 | 4.71  |
| ENSMUSG00000024188 | <i>Luc7l</i>       | 3     | 2.44  | 2.61 | 2.6   |
| ENSMUSG00000024190 | <i>Dusp1</i>       | 5.29  | 5.36  | 4.67 | 5.85  |
| ENSMUSG00000024191 | <i>Sec20</i>       | 3.51  | 3.73  | 4.01 | 3.67  |
| ENSMUSG00000024193 | <i>Phf1</i>        | 2.15  | 3.1   | 3.01 | 2.51  |
| ENSMUSG00000024194 | <i>Cuta</i>        | 5.75  | 6.08  | 6    | 5.94  |
| ENSMUSG00000024197 | <i>M6prbp1</i>     | 4.86  | 4.58  | 5.32 | 5.02  |
| ENSMUSG00000024201 | <i>mKIAA0876</i>   | 1.68  | 2.7   | 2.16 | 2.31  |
| ENSMUSG00000024208 | <i>2900010M23R</i> | 4.79  | 4.62  | 6.02 | 5.18  |
| ENSMUSG00000024212 | <i>Mllt1</i>       | 2.8   | 3.68  | 3.27 | 3.34  |
| ENSMUSG00000024213 | <i>Nudt3</i>       | 3.85  | 3.57  | 3.85 | 3.54  |
| ENSMUSG00000024218 | <i>Taf11</i>       | 2.6   | 2.38  | 2.59 | 2.14  |

|                    |                     |      |      |      |      |
|--------------------|---------------------|------|------|------|------|
| ENSMUSG00000024219 | <i>Anks1</i>        | 2.62 | 2.73 | 2.97 | 2.74 |
| ENSMUSG00000024220 | <i>Zfp523</i>       | 2.49 | 3.25 | 2.65 | 2.63 |
| ENSMUSG00000024222 | <i>Fkbp5</i>        | 6.89 | 6.94 | 6.28 | 5.88 |
| ENSMUSG00000024228 | <i>Nudt12</i>       | 4.98 | 3.98 | 4.77 | 4.1  |
| ENSMUSG00000024231 | <i>Cul2</i>         | 4.1  | 3.69 | 3.79 | 3.3  |
| ENSMUSG00000024234 | <i>Papd1</i>        | 3.88 | 3.18 | 3.74 | 3.26 |
| ENSMUSG00000024236 | <i>Svil</i>         | 1.74 | 2.02 | 2.42 | 2.21 |
| ENSMUSG00000024238 | <i>Zfhl1a</i>       | 2.47 | 2.06 | 2.07 | 2.13 |
| ENSMUSG00000024240 | <i>Epc1</i>         | 2.03 | 2.19 | 2.56 | 2.22 |
| ENSMUSG00000024241 | <i>Sos1</i>         | 3.7  | 2.73 | 3.65 | 3.2  |
| ENSMUSG00000024242 | <i>Map4k3</i>       | 3.53 | 2.51 | 3.3  | 2.82 |
| ENSMUSG00000024247 | <i>AW548124</i>     | 3.1  | 4.22 | 3.39 | 3.75 |
| ENSMUSG00000024248 | <i>Cox7a2l</i>      | 4.86 | 4.84 | 5.02 | 4.84 |
| ENSMUSG00000024251 | <i>NA</i>           | 0.42 | 1.02 | 1.15 | 0.82 |
| ENSMUSG00000024254 | <i>Abcg8</i>        | 5.03 | 4.95 | 5.32 | 5.17 |
| ENSMUSG00000024258 | <i>Polr2d</i>       | 3.03 | 2.82 | 2.44 | 2.76 |
| ENSMUSG00000024259 | <i>Slc25a46</i>     | 5.02 | 3.66 | 4.62 | 3.81 |
| ENSMUSG00000024260 | <i>Sap130</i>       | 2.75 | 2.81 | 2.79 | 2.42 |
| ENSMUSG00000024269 | <i>AK171952</i>     | 2.79 | 2.65 | 2.33 | 1.97 |
| ENSMUSG00000024271 | <i>Elp2</i>         | 3.72 | 3.69 | 3.86 | 3.67 |
| ENSMUSG00000024273 | <i>2700062C07Ri</i> | 1.99 | 2.44 | 1.99 | 2.51 |
| ENSMUSG00000024276 | <i>Zfp397</i>       | 2.87 | 1.82 | 2.27 | 1.7  |
| ENSMUSG00000024277 | <i>Mapre2</i>       | 2.24 | 2.31 | 2.59 | 2.49 |
| ENSMUSG00000024283 | <i>Wac</i>          | 4.4  | 4.14 | 4.41 | 4.26 |
| ENSMUSG00000024286 | <i>Ccny</i>         | 5.04 | 4.53 | 4.44 | 4    |
| ENSMUSG00000024287 | <i>Thoc1</i>        | 3.04 | 2.32 | 3.01 | 2.22 |
| ENSMUSG00000024290 | <i>Rock1</i>        | 4.01 | 2.65 | 3.45 | 2.75 |
| ENSMUSG00000024292 | <i>Cyp4f14</i>      | 7.65 | 7.66 | 7.58 | 7.35 |
| ENSMUSG00000024293 | <i>Escol</i>        | 2.41 | 0.87 | 1.65 | 1.05 |
| ENSMUSG00000024294 | <i>Mib1</i>         | 3.31 | 3.11 | 3.17 | 3.08 |
| ENSMUSG00000024298 | <i>9030612M13R</i>  | 2.67 | 1.3  | 2.73 | 1.95 |

|                    |                |      |      |      |      |
|--------------------|----------------|------|------|------|------|
| ENSMUSG00000024304 | <i>Cdh2</i>    | 4.12 | 4.46 | 4.19 | 3.99 |
| ENSMUSG00000024308 | <i>Tapbp</i>   | 5.68 | 5.97 | 5.79 | 5.55 |
| ENSMUSG00000024309 | <i>H2-Ke2</i>  | 4.93 | 5.28 | 4.79 | 4.87 |
| ENSMUSG00000024312 | <i>Wdr46</i>   | 3.32 | 4.27 | 3.59 | 3.42 |
| ENSMUSG00000024317 | <i>Rnf138</i>  | 2.97 | 2.12 | 2.31 | 1.88 |
| ENSMUSG00000024319 | <i>Vps52</i>   | 3.33 | 3.9  | 3.6  | 3.29 |
| ENSMUSG00000024325 | <i>Ring1</i>   | 3.1  | 3.75 | 3.63 | 3.66 |
| ENSMUSG00000024327 | <i>Slc39a7</i> | 5.18 | 6.17 | 5.29 | 5.41 |
| ENSMUSG00000024331 | <i>Dsc2</i>    | 4.19 | 3.66 | 4.08 | 3.83 |
| ENSMUSG00000024335 | <i>Brd2</i>    | 4.75 | 4.85 | 4.97 | 4.98 |
| ENSMUSG00000024337 | <i>Psmb9</i>   | 2.43 | 2.06 | 1.84 | 1.31 |
| ENSMUSG00000024338 | <i>Psmb8</i>   | 4.35 | 4.31 | 4.16 | 4.18 |
| ENSMUSG00000024339 | <i>Tap2</i>    | 3.26 | 3.57 | 3.08 | 3.07 |
| ENSMUSG00000024346 | <i>Pfdn1</i>   | 5.01 | 5.24 | 5.37 | 5.03 |
| ENSMUSG00000024349 | <i>NA</i>      | 1.18 | 0.35 | 0.47 | 0.59 |
| ENSMUSG00000024350 | <i>Dnajc18</i> | 1.84 | 1.78 | 1.8  | 1.77 |
| ENSMUSG00000024354 | <i>Slc23a1</i> | 5.51 | 4.92 | 5.14 | 4.52 |
| ENSMUSG00000024357 | <i>Sill</i>    | 4.64 | 5.15 | 4.7  | 5.5  |
| ENSMUSG00000024359 | <i>Hspa9</i>   | 7.82 | 7.52 | 7.67 | 7.3  |
| ENSMUSG00000024360 | <i>Etf1</i>    | 6.01 | 5.21 | 5.44 | 5.14 |
| ENSMUSG00000024369 | <i>Rdbp</i>    | 4.07 | 4.79 | 4.02 | 3.94 |
| ENSMUSG00000024370 | <i>Cdc23</i>   | 2.58 | 2.25 | 2.18 | 1.8  |
| ENSMUSG00000024371 | <i>Cfb</i>     | 8.95 | 9.37 | 9.08 | 9.14 |
| ENSMUSG00000024372 | <i>C2</i>      | 5.38 | 5.27 | 5.14 | 5.09 |
| ENSMUSG00000024378 | <i>Stard4</i>  | 5.29 | 4.53 | 4.45 | 3.91 |
| ENSMUSG00000024380 | <i>Gypc</i>    | 3.57 | 3.64 | 3.66 | 3.3  |
| ENSMUSG00000024381 | <i>Bin1</i>    | 2.6  | 3.16 | 2.92 | 2.8  |
| ENSMUSG00000024382 | <i>Ercc3</i>   | 2.97 | 3.27 | 3.09 | 2.7  |
| ENSMUSG00000024383 | <i>Map3k2</i>  | 1.42 | 0.37 | 0.98 | 1.1  |
| ENSMUSG00000024384 | <i>Iws1</i>    | 2.56 | 2.28 | 2.48 | 1.85 |
| ENSMUSG00000024386 | <i>Proc</i>    | 7.91 | 8.76 | 8.33 | 8.24 |

|                    |                     |       |        |      |       |
|--------------------|---------------------|-------|--------|------|-------|
| ENSMUSG00000024387 | <i>Csnk2b</i>       | 6.42  | 7.07   | 6.86 | 6.88  |
| ENSMUSG00000024389 | <i>Bat4</i>         | 1.42  | 2.25   | 2.44 | 2.25  |
| ENSMUSG00000024391 | <i>Apom</i>         | 8.59  | 8.46   | 8.53 | 8.51  |
| ENSMUSG00000024392 | <i>Bat3</i>         | 4.58  | 5.49   | 5.2  | 5.09  |
| ENSMUSG00000024393 | <i>Bat2</i>         | 4.46  | 5.39   | 4.95 | 4.95  |
| ENSMUSG00000024395 | <i>Lims2</i>        | 5.86  | 6.39   | 6.29 | 6.14  |
| ENSMUSG00000024397 | <i>Aif1</i>         | 1.92  | 0.91   | 1.59 | 0.96  |
| ENSMUSG00000024399 | <i>Ltb</i>          | -0.74 | -0.62  | 1.86 | -2.43 |
| ENSMUSG00000024400 | <i>Wdr33</i>        | 3.35  | 2.92   | 3.25 | 3.07  |
| ENSMUSG00000024404 | <i>Riok3</i>        | 5.24  | 4.9    | 4.97 | 4.55  |
| ENSMUSG00000024410 | <i>3110002H16Ri</i> | 3.94  | 3.87   | 4.26 | 3.88  |
| ENSMUSG00000024413 | <i>Npc1</i>         | 5.83  | 5.34   | 6.22 | 5.83  |
| ENSMUSG00000024414 | <i>Mrpl27</i>       | 3.3   | 4.08   | 3.64 | 3.74  |
| ENSMUSG00000024422 | <i>Dhx16</i>        | 3.43  | 4.07   | 3.62 | 3.55  |
| ENSMUSG00000024423 | <i>Impact</i>       | 2.72  | 1.78   | 1.72 | 1.65  |
| ENSMUSG00000024424 | <i>2810439F02Ri</i> | 5.97  | 5.67   | 5.89 | 5.56  |
| ENSMUSG00000024425 | <i>Ndfip1</i>       | 7.97  | 7.03   | 7.56 | 6.98  |
| ENSMUSG00000024426 | <i>2610110G12Ri</i> | 2.19  | 2.09   | 2.36 | 1.99  |
| ENSMUSG00000024427 | <i>Spry4</i>        | 2.51  | 2.51   | 1.32 | 1.47  |
| ENSMUSG00000024429 | <i>Gna-rs1</i>      | 2.82  | 3.75   | 3.07 | 3.14  |
| ENSMUSG00000024430 | <i>Cabyr</i>        | 0.43  | 0.16   | 1.07 | 0.8   |
| ENSMUSG00000024431 | <i>Nr3c1</i>        | 4.97  | 3.94   | 4.4  | 4.08  |
| ENSMUSG00000024436 | <i>Mrps18b</i>      | 3.63  | 4.63   | 4.19 | 4.22  |
| ENSMUSG00000024437 | <i>NA</i>           | 1.81  | #NAME? | 2.6  | -3.65 |
| ENSMUSG00000024440 | <i>Pcdh12</i>       | 1.07  | 1.9    | 0.24 | 0.7   |
| ENSMUSG00000024442 | <i>0610009O20Ri</i> | 4.26  | 4.62   | 4.68 | 4.35  |
| ENSMUSG00000024446 | <i>Rpp21</i>        | 3.58  | 3.84   | 4.18 | 4.3   |
| ENSMUSG00000024451 | <i>Centd3</i>       | 1.64  | 2.1    | 1.47 | 1.4   |
| ENSMUSG00000024454 | <i>Hdac3</i>        | 4.03  | 4.45   | 4.3  | 4.07  |
| ENSMUSG00000024456 | <i>BC029331</i>     | 4.48  | 4.64   | 4.39 | 4.16  |
| ENSMUSG00000024457 | <i>Trim26</i>       | 3.65  | 3.57   | 3.9  | 3.6   |

|                    |                     |      |      |      |      |
|--------------------|---------------------|------|------|------|------|
| ENSMUSG00000024472 | <i>NA</i>           | 1.57 | 1.17 | 1.22 | 1.03 |
| ENSMUSG00000024474 | <i>Ik</i>           | 4.86 | 5.13 | 4.92 | 4.76 |
| ENSMUSG00000024477 | <i>Pggt1b</i>       | 2.78 | 1.88 | 2.17 | 1.64 |
| ENSMUSG00000024479 | <i>Mal2</i>         | 5.15 | 4.68 | 4.6  | 4.14 |
| ENSMUSG00000024480 | <i>Ap3s1</i>        | 3.1  | 1.01 | 2.23 | 0.81 |
| ENSMUSG00000024483 | <i>Eif4ebp3</i>     | 4.14 | 4.11 | 4.5  | 4.32 |
| ENSMUSG00000024487 | <i>Yipf5</i>        | 5.02 | 4.21 | 4.51 | 4.1  |
| ENSMUSG00000024491 | <i>NA</i>           | 2.82 | 2.01 | 2.51 | 2.13 |
| ENSMUSG00000024493 | <i>Lars</i>         | 3.29 | 3.16 | 3.14 | 2.73 |
| ENSMUSG00000024498 | <i>Tcerg1</i>       | 2.32 | 1.69 | 2.06 | 1.64 |
| ENSMUSG00000024507 | <i>Hsd17b4</i>      | 7.75 | 7.48 | 7.64 | 7.34 |
| ENSMUSG00000024513 | <i>Mbd2</i>         | 4.95 | 4.66 | 4.75 | 4.47 |
| ENSMUSG00000024515 | <i>Smad4</i>        | 4.06 | 4.11 | 4.08 | 3.69 |
| ENSMUSG00000024516 | <i>Sec11c</i>       | 4.27 | 4.29 | 4.2  | 3.93 |
| ENSMUSG00000024527 | <i>Afg3l2</i>       | 4.97 | 5.16 | 5.21 | 4.93 |
| ENSMUSG00000024528 | <i>Srfbp1</i>       | 2.8  | 1.76 | 2.38 | 2.37 |
| ENSMUSG00000024535 | <i>Snx24</i>        | 2.59 | 1.37 | 2.33 | 1.92 |
| ENSMUSG00000024537 | <i>Tnfrsf5ip1</i>   | 3.86 | 3.62 | 3.63 | 3.44 |
| ENSMUSG00000024538 | <i>Ppic</i>         | 1.14 | 0.94 | 0.94 | 1.33 |
| ENSMUSG00000024539 | <i>Ptpn2</i>        | 2.24 | 1.7  | 2.39 | 1.85 |
| ENSMUSG00000024560 | <i>Cxxc1</i>        | 4.04 | 4.81 | 4.53 | 4.34 |
| ENSMUSG00000024561 | <i>Mbd1</i>         | 4.07 | 4.4  | 3.96 | 4.15 |
| ENSMUSG00000024563 | <i>Smad2</i>        | 3.42 | 2.83 | 3.2  | 2.71 |
| ENSMUSG00000024566 | <i>Atp9b</i>        | 3.41 | 3.39 | 3.27 | 3.09 |
| ENSMUSG00000024570 | <i>I110032A13Ri</i> | 4.07 | 4.63 | 4.58 | 4.21 |
| ENSMUSG00000024571 | <i>Txn14a</i>       | 5.37 | 5.76 | 5.46 | 5.49 |
| ENSMUSG00000024576 | <i>Csnk1a1</i>      | 5.92 | 5.08 | 5.53 | 5.18 |
| ENSMUSG00000024580 | <i>Grpel2</i>       | 4.61 | 3.75 | 4.38 | 3.87 |
| ENSMUSG00000024581 | <i>Napg</i>         | 3.31 | 2.66 | 3.05 | 2.84 |
| ENSMUSG00000024583 | <i>Txn11</i>        | 5.72 | 4.99 | 5.22 | 4.65 |
| ENSMUSG00000024587 | <i>Nars</i>         | 5.65 | 5.58 | 5.21 | 5.07 |

|                    |                     |       |       |       |       |
|--------------------|---------------------|-------|-------|-------|-------|
| ENSMUSG00000024588 | <i>Fech</i>         | 6.77  | 6.77  | 6.57  | 6.44  |
| ENSMUSG00000024589 | <i>Nedd4l</i>       | 5.07  | 4.76  | 4.51  | 4.04  |
| ENSMUSG00000024590 | <i>Lmnb1</i>        | 1.26  | 1.14  | 1.48  | 0.6   |
| ENSMUSG00000024592 | <i>NA</i>           | 3.8   | 2.39  | 3.56  | 2.63  |
| ENSMUSG00000024594 | <i>Prrcl</i>        | 3.79  | 3.72  | 3.49  | 3.26  |
| ENSMUSG00000024597 | <i>Slc12a2</i>      | 1.7   | 0.84  | 1.67  | 1.01  |
| ENSMUSG00000024601 | <i>Isoc1</i>        | 6.09  | 5.75  | 5.4   | 5.09  |
| ENSMUSG00000024603 | <i>Dctn4</i>        | 3.81  | 3.47  | 3.64  | 3.23  |
| ENSMUSG00000024604 | <i>Rbm22</i>        | 3.5   | 3.58  | 3.9   | 3.56  |
| ENSMUSG00000024608 | <i>Rps14</i>        | 6.13  | 7.44  | 7.16  | 6.86  |
| ENSMUSG00000024610 | <i>Cd74</i>         | 7.07  | 7.09  | 7.24  | 6.55  |
| ENSMUSG00000024613 | <i>Tcofl</i>        | 1.7   | 1.91  | 1.72  | 1.68  |
| ENSMUSG00000024614 | <i>Txndc10</i>      | 2.87  | 1.56  | 2.23  | 1.55  |
| ENSMUSG00000024620 | <i>Pdgfrb</i>       | 1.56  | 2.44  | 2.1   | 1.85  |
| ENSMUSG00000024621 | <i>Csf1r</i>        | 4.08  | 4.26  | 4.07  | 3.89  |
| ENSMUSG00000024622 | <i>A630042L21Ri</i> | 2.51  | 2.93  | 2.65  | 2.58  |
| ENSMUSG00000024639 | <i>Gnaq</i>         | 3.01  | 2.64  | 2.92  | 2.69  |
| ENSMUSG00000024642 | <i>Tle4</i>         | 2.21  | 1.85  | 2.04  | 2.3   |
| ENSMUSG00000024644 | <i>Cndp2</i>        | 4.6   | 4.96  | 4.35  | 4.24  |
| ENSMUSG00000024645 | <i>1700034H14Ri</i> | 4.25  | 3.48  | 3.79  | 3.36  |
| ENSMUSG00000024646 | <i>Cyb5</i>         | 10.16 | 10.29 | 10.34 | 10.62 |
| ENSMUSG00000024654 | <i>Asrgl1</i>       | 2.93  | 2.7   | 3.07  | 2.72  |
| ENSMUSG00000024659 | <i>AKI70612</i>     | 0.83  | 1.42  | 1.14  | 1.41  |
| ENSMUSG00000024661 | <i>Fth1</i>         | 10.36 | 10.04 | 10.24 | 10.09 |
| ENSMUSG00000024664 | <i>Fads3</i>        | 0.6   | 1.34  | 1.06  | 1.04  |
| ENSMUSG00000024665 | <i>Fads2</i>        | 8.21  | 8.19  | 7.47  | 7.46  |
| ENSMUSG00000024666 | <i>Tmem138</i>      | 0.83  | 1.69  | 1.15  | 1.17  |
| ENSMUSG00000024667 | <i>2810441K11Ri</i> | 2.22  | 1.28  | 1.9   | 1.73  |
| ENSMUSG00000024668 | <i>0610038F07Ri</i> | 4.9   | 4.43  | 4.79  | 4.51  |
| ENSMUSG00000024673 | <i>Ms4a1</i>        | -1.09 | -3.07 | 1.73  | -3.08 |
| ENSMUSG00000024678 | <i>Ms4a4d</i>       | 2.17  | 1.26  | 1.51  | 1.63  |

|                    |                     |      |       |      |       |
|--------------------|---------------------|------|-------|------|-------|
| ENSMUSG00000024679 | <i>Ms4a6d</i>       | 1.84 | 0.19  | 1.13 | 0.01  |
| ENSMUSG00000024683 | <i>Mrpl16</i>       | 5.74 | 4.9   | 5.4  | 5.3   |
| ENSMUSG00000024687 | <i>Osbp</i>         | 4.52 | 4.55  | 4.05 | 4.04  |
| ENSMUSG00000024691 | <i>4632417K18Ri</i> | 1.35 | 0.26  | 0.72 | -0.51 |
| ENSMUSG00000024694 | <i>Kegl</i>         | 6.41 | 6.45  | 5.69 | 6.13  |
| ENSMUSG00000024695 | <i>Zfp91</i>        | 5.12 | 4.29  | 4.72 | 4.31  |
| ENSMUSG00000024712 | <i>Rfk</i>          | 5.83 | 5.09  | 5.23 | 4.72  |
| ENSMUSG00000024713 | <i>NA</i>           | 1.84 | 1.9   | 1.95 | 1.66  |
| ENSMUSG00000024725 | <i>Ostf1</i>        | 4.64 | 4.41  | 4.65 | 4.42  |
| ENSMUSG00000024730 | <i>Ms4a8a</i>       | 1.74 | 0.81  | 0.81 | 0.92  |
| ENSMUSG00000024732 | <i>Ccdc86</i>       | 2.9  | 3.76  | 3.02 | 3.41  |
| ENSMUSG00000024735 | <i>Prpf19</i>       | 5.02 | 5.65  | 5.44 | 5.37  |
| ENSMUSG00000024737 | <i>Slc15a3</i>      | 1.64 | 1.92  | 0.83 | 0.8   |
| ENSMUSG00000024740 | <i>Ddb1</i>         | 5.98 | 6.2   | 6.05 | 6.07  |
| ENSMUSG00000024742 | <i>Fen1</i>         | 0.55 | 0.83  | 1.22 | 0.39  |
| ENSMUSG00000024747 | <i>Aldh1a7</i>      | 7.2  | 6.55  | 7.05 | 6.37  |
| ENSMUSG00000024750 | <i>Zfand5</i>       | 4.38 | 3.53  | 4.14 | 3.7   |
| ENSMUSG00000024754 | <i>Tmem2</i>        | 2.38 | 2.57  | 1.74 | 1.88  |
| ENSMUSG00000024758 | <i>Rtn3</i>         | 5.48 | 5.16  | 5.09 | 4.77  |
| ENSMUSG00000024759 | <i>5730596K20Ri</i> | 5.23 | 4.04  | 4.65 | 4.22  |
| ENSMUSG00000024761 | <i>NA</i>           | 3.21 | 2.5   | 2.54 | 3.37  |
| ENSMUSG00000024764 | <i>NA</i>           | 2.56 | 2.81  | 2.85 | 2.42  |
| ENSMUSG00000024766 | <i>A1747699</i>     | 1.32 | -1.07 | 0.38 | -0.34 |
| ENSMUSG00000024767 | <i>Otub1</i>        | 4.36 | 5.23  | 5.22 | 5.16  |
| ENSMUSG00000024769 | <i>NA</i>           | 1.61 | 1.98  | 1.93 | 1.65  |
| ENSMUSG00000024772 | <i>Ehd1</i>         | 4.87 | 5.14  | 5.11 | 4.76  |
| ENSMUSG00000024773 | <i>Atg2a</i>        | 3.29 | 4.11  | 4.01 | 3.73  |
| ENSMUSG00000024777 | <i>Ppp2r5b</i>      | 2.23 | 3.03  | 2.71 | 2.59  |
| ENSMUSG00000024778 | <i>Fas</i>          | 4.15 | 3.42  | 3.48 | 3.06  |
| ENSMUSG00000024780 | <i>Cdc37l1</i>      | 4.89 | 3.72  | 4.28 | 3.73  |
| ENSMUSG00000024781 | <i>Lipa</i>         | 7.5  | 6.94  | 6.93 | 6.62  |



|                    |                     |      |      |      |      |
|--------------------|---------------------|------|------|------|------|
| ENSMUSG00000024782 | <i>Ak3</i>          | 8.35 | 7.83 | 8.05 | 7.69 |
| ENSMUSG00000024785 | <i>Rcl1</i>         | 5.77 | 5.99 | 6.1  | 6.09 |
| ENSMUSG00000024787 | <i>Snx15</i>        | 3.09 | 3.56 | 3.47 | 3.33 |
| ENSMUSG00000024789 | <i>Jak2</i>         | 2.84 | 2    | 2.69 | 1.89 |
| ENSMUSG00000024790 | <i>Sac3d1</i>       | 2.03 | 2.54 | 2.57 | 2.27 |
| ENSMUSG00000024792 | <i>Zfp11</i>        | 3.23 | 3.98 | 3.63 | 3.43 |
| ENSMUSG00000024797 | <i>I110014N23Ri</i> | 2.76 | 3.76 | 3.16 | 3.02 |
| ENSMUSG00000024799 | <i>Tm7sf2</i>       | 7    | 6.89 | 6.98 | 6.47 |
| ENSMUSG00000024800 | <i>Rpp30</i>        | 2.95 | 2.47 | 2.82 | 2.76 |
| ENSMUSG00000024805 | <i>Pcgf5</i>        | 2.73 | 2.05 | 2.56 | 2.14 |
| ENSMUSG00000024807 | <i>Syvn1</i>        | 4.69 | 6.25 | 5.03 | 5.04 |
| ENSMUSG00000024811 | <i>NA</i>           | 4.03 | 3.74 | 4.11 | 3.62 |
| ENSMUSG00000024812 | <i>Tjp2</i>         | 2.39 | 2.71 | 2.32 | 2.32 |
| ENSMUSG00000024816 | <i>I200004M23Ri</i> | 3.48 | 3.28 | 3.65 | 3.23 |
| ENSMUSG00000024817 | <i>NIRF</i>         | 3.46 | 3.16 | 3.43 | 3.01 |
| ENSMUSG00000024818 | <i>Slc25a45</i>     | 4.17 | 3.8  | 4.02 | 3.75 |
| ENSMUSG00000024824 | <i>Rad9</i>         | 3.58 | 3.11 | 3.56 | 3.22 |
| ENSMUSG00000024826 | <i>Gja10</i>        | 3.88 | 4.18 | 3.96 | 3.95 |
| ENSMUSG00000024827 | <i>Gldc</i>         | 6.87 | 6.71 | 6.82 | 6.19 |
| ENSMUSG00000024829 | <i>Mrpl21</i>       | 2.41 | 2.02 | 2.09 | 2.85 |
| ENSMUSG00000024830 | <i>Rps6kb2</i>      | 2.99 | 3.67 | 3.4  | 3.2  |
| ENSMUSG00000024833 | <i>Pola2</i>        | 1.1  | 1.3  | 1.95 | 1.47 |
| ENSMUSG00000024835 | <i>Coro1b</i>       | 5.29 | 5.4  | 5.6  | 5.4  |
| ENSMUSG00000024841 | <i>2010003J03Ri</i> | 4.06 | 4.63 | 4.51 | 4.42 |
| ENSMUSG00000024843 | <i>Chka</i>         | 4.69 | 5.22 | 3.38 | 3.17 |
| ENSMUSG00000024844 | <i>Banfl</i>        | 5.65 | 5.88 | 5.87 | 5.63 |
| ENSMUSG00000024845 | <i>Tmem134</i>      | 5.26 | 5.53 | 5.34 | 5.22 |
| ENSMUSG00000024847 | <i>Aip</i>          | 4.07 | 4.87 | 4.56 | 4.35 |
| ENSMUSG00000024853 | <i>Sf3b2</i>        | 5.3  | 5.46 | 5.37 | 5.21 |
| ENSMUSG00000024854 | <i>Pold4</i>        | 4.34 | 4.67 | 4.78 | 4.37 |
| ENSMUSG00000024855 | <i>Pacs1</i>        | 0.44 | 1.07 | 1.06 | 0.18 |

|                    |                 |      |      |      |      |
|--------------------|-----------------|------|------|------|------|
| ENSMUSG00000024856 | <i>Cdk2ap2</i>  | 5.26 | 6.28 | 5.46 | 5.46 |
| ENSMUSG00000024858 | <i>Adrbk1</i>   | 3.7  | 4.22 | 4.09 | 3.69 |
| ENSMUSG00000024862 | <i>Klc2</i>     | 1.5  | 2.5  | 2.31 | 1.87 |
| ENSMUSG00000024863 | <i>Mbl2</i>     | 8.5  | 8.29 | 8.28 | 8.18 |
| ENSMUSG00000024866 | <i>Acy3</i>     | 5.89 | 6.48 | 6.39 | 6    |
| ENSMUSG00000024869 | <i>Nudt8</i>    | 3.64 | 4.51 | 4.43 | 4.12 |
| ENSMUSG00000024870 | <i>Rab1b</i>    | 6.47 | 7.19 | 6.87 | 6.59 |
| ENSMUSG00000024875 | <i>Yif1a</i>    | 5.71 | 6.21 | 5.79 | 5.67 |
| ENSMUSG00000024878 | <i>Cbwd1</i>    | 2.02 | 1.34 | 1.79 | 1.79 |
| ENSMUSG00000024887 | <i>Asah2</i>    | 3.1  | 2.02 | 2.57 | 2.07 |
| ENSMUSG00000024889 | <i>Rce1</i>     | 3.15 | 3.81 | 2.68 | 2.54 |
| ENSMUSG00000024892 | <i>Pcx</i>      | 7.26 | 7.5  | 7.63 | 7.28 |
| ENSMUSG00000024896 | <i>Minpp1</i>   | 4.25 | 4.14 | 4.42 | 3.86 |
| ENSMUSG00000024899 | <i>Paps2</i>    | 7.4  | 6.91 | 7.12 | 6.5  |
| ENSMUSG00000024900 | <i>Cpt1a</i>    | 6.93 | 6.69 | 6.87 | 6.69 |
| ENSMUSG00000024902 | <i>Mrpl11</i>   | 4.97 | 5.11 | 5.18 | 4.96 |
| ENSMUSG00000024906 | <i>Mus81</i>    | 1.64 | 2.49 | 2.34 | 2.13 |
| ENSMUSG00000024908 | <i>Saps3</i>    | 5.08 | 4.59 | 4.73 | 4.22 |
| ENSMUSG00000024911 | <i>Fibp</i>     | 4.04 | 4.6  | 4.06 | 4    |
| ENSMUSG00000024913 | <i>Lrp5</i>     | 4.74 | 5.54 | 5.02 | 4.7  |
| ENSMUSG00000024914 | <i>Drap1</i>    | 5.48 | 6.01 | 5.52 | 5.54 |
| ENSMUSG00000024921 | <i>Smarca2</i>  | 4.35 | 4.12 | 4.51 | 4.16 |
| ENSMUSG00000024924 | <i>Vldlr</i>    | 3.31 | 2.36 | 2.51 | 1.71 |
| ENSMUSG00000024925 | <i>Rnaseh2c</i> | 4.56 | 5.24 | 4.72 | 4.64 |
| ENSMUSG00000024926 | <i>Htatip</i>   | 2.93 | 3.23 | 2.96 | 2.75 |
| ENSMUSG00000024927 | <i>Rela</i>     | 4.81 | 5.69 | 5.13 | 5.16 |
| ENSMUSG00000024939 | <i>Mtvr2</i>    | 3.2  | 3.94 | 3.73 | 3.83 |
| ENSMUSG00000024941 | <i>Scyl1</i>    | 4.26 | 4.82 | 4.69 | 4.63 |
| ENSMUSG00000024942 | <i>Capn1</i>    | 2.81 | 3.18 | 2.85 | 2.77 |
| ENSMUSG00000024943 | <i>Smc5</i>     | 2.89 | 1.83 | 2.51 | 1.95 |
| ENSMUSG00000024944 | <i>Arl2</i>     | 2.15 | 2.44 | 2.66 | 2.41 |

|                    |                     |       |       |       |       |
|--------------------|---------------------|-------|-------|-------|-------|
| ENSMUSG00000024947 | <i>Men1</i>         | 3.62  | 3.86  | 3.78  | 3.57  |
| ENSMUSG00000024948 | <i>Map4k2</i>       | 1.67  | 2.23  | 1.71  | 1.51  |
| ENSMUSG00000024949 | <i>Sfl</i>          | 5.33  | 5.36  | 5.27  | 5.17  |
| ENSMUSG00000024952 | <i>Rps6ka4</i>      | 1.58  | 2.5   | 2.11  | 1.92  |
| ENSMUSG00000024953 | <i>Prdx5</i>        | 7.75  | 7.61  | 7.82  | 7.72  |
| ENSMUSG00000024955 | <i>Esrra</i>        | 3.06  | 4.02  | 4.18  | 3.76  |
| ENSMUSG00000024958 | <i>Gpr137</i>       | 2.67  | 3.35  | 3.15  | 2.93  |
| ENSMUSG00000024959 | <i>Bad</i>          | 3.41  | 3.83  | 3.69  | 3.41  |
| ENSMUSG00000024960 | <i>Plcb3</i>        | 2.22  | 3.06  | 2.63  | 2.52  |
| ENSMUSG00000024962 | <i>Vegfb</i>        | 3.54  | 4.07  | 3.51  | 3.58  |
| ENSMUSG00000024963 | <i>Dnajc4</i>       | 2.93  | 3.27  | 3.11  | 2.73  |
| ENSMUSG00000024965 | <i>BC032204</i>     | 0.5   | 1.19  | 1.62  | 0.63  |
| ENSMUSG00000024966 | <i>Stip1</i>        | 6.07  | 6.52  | 5.9   | 6.3   |
| ENSMUSG00000024969 | <i>Mark2</i>        | 2.45  | 2.88  | 3.02  | 3     |
| ENSMUSG00000024974 | <i>Smc3</i>         | 3.37  | 2.7   | 2.84  | 2.54  |
| ENSMUSG00000024975 | <i>Pdcd4</i>        | 6.14  | 5.56  | 5.99  | 5.39  |
| ENSMUSG00000024976 | <i>Shoc2</i>        | 4.47  | 3.77  | 4.18  | 3.83  |
| ENSMUSG00000024978 | <i>mKIAA1560</i>    | 5.61  | 5.57  | 5.44  | 5.05  |
| ENSMUSG00000024981 | <i>Acsl5</i>        | 7.72  | 7.15  | 7.29  | 6.84  |
| ENSMUSG00000024982 | <i>Zdhhc6</i>       | 4.79  | 4.75  | 4.75  | 4.4   |
| ENSMUSG00000024983 | <i>Vti1a</i>        | 2.6   | 1.93  | 2.29  | 2.03  |
| ENSMUSG00000024985 | <i>Tcf4</i>         | 2.38  | 2.06  | 2.74  | 2.55  |
| ENSMUSG00000024986 | <i>Hhex</i>         | 5.46  | 4.98  | 5.31  | 5.91  |
| ENSMUSG00000024987 | <i>Cyp26a1</i>      | 3.64  | 3.37  | 4.12  | 2.82  |
| ENSMUSG00000024990 | <i>Rbp4</i>         | 10.42 | 10.93 | 10.81 | 10.63 |
| ENSMUSG00000024991 | <i>Eif3s10</i>      | 5.7   | 5.48  | 5.55  | 5.05  |
| ENSMUSG00000024993 | <i>I810055E12Ri</i> | 4     | 3.08  | 3.42  | 2.83  |
| ENSMUSG00000024997 | <i>Prdx3</i>        | 6.99  | 6.14  | 6.62  | 6.2   |
| ENSMUSG00000024998 | <i>PLC-epsilon</i>  | 1.42  | 0.9   | 1.09  | 0.8   |
| ENSMUSG00000024999 | <i>Noc3l</i>        | 1.51  | 0.65  | 1.53  | 0.67  |
| ENSMUSG00000025003 | <i>Cyp2c39</i>      | 9.59  | 8.82  | 9.35  | 8.97  |

|                    |                     |      |      |      |      |
|--------------------|---------------------|------|------|------|------|
| ENSMUSG00000025004 | <i>Cyp2c40</i>      | 6.78 | 5.8  | 5.99 | 5.26 |
| ENSMUSG00000025006 | <i>Sorbs1</i>       | 3.2  | 2.79 | 3.64 | 3.49 |
| ENSMUSG00000025016 | <i>Tm9sf3</i>       | 6.51 | 5.51 | 5.84 | 5.32 |
| ENSMUSG00000025017 | <i>Pik3ap1</i>      | 5.74 | 5.64 | 5.23 | 5.09 |
| ENSMUSG00000025019 | <i>mlr2</i>         | 2.07 | 0.54 | 1.47 | 1.17 |
| ENSMUSG00000025024 | <i>Smndc1</i>       | 3.37 | 2.02 | 3.17 | 2.6  |
| ENSMUSG00000025025 | <i>Mxi1</i>         | 2.96 | 2.86 | 2.93 | 2.58 |
| ENSMUSG00000025026 | <i>Add3</i>         | 2.65 | 2.55 | 2.4  | 2.1  |
| ENSMUSG00000025027 | <i>Xpnpepl</i>      | 3.96 | 4.47 | 4.24 | 3.96 |
| ENSMUSG00000025034 | <i>Trim8</i>        | 4.23 | 5.18 | 4.92 | 4.9  |
| ENSMUSG00000025035 | <i>Arl3</i>         | 4.17 | 4.15 | 4.2  | 4.23 |
| ENSMUSG00000025036 | <i>Sfxn2</i>        | 4.22 | 3.73 | 4.29 | 3.87 |
| ENSMUSG00000025037 | <i>Maoa</i>         | 2.28 | 1.7  | 1.93 | 1.42 |
| ENSMUSG00000025039 | <i>NA</i>           | 3.44 | 4.08 | 3.77 | 3.28 |
| ENSMUSG00000025040 | <i>Fundc1</i>       | 2.82 | 1.59 | 2.24 | 1.68 |
| ENSMUSG00000025041 | <i>Nt5c2</i>        | 3.49 | 3.48 | 3.46 | 2.9  |
| ENSMUSG00000025044 | <i>Msr1</i>         | 2.69 | 2.52 | 2.33 | 2.17 |
| ENSMUSG00000025047 | <i>Pdcd11</i>       | 2.29 | 2.96 | 2.78 | 2.41 |
| ENSMUSG00000025049 | <i>Taf5</i>         | 1.08 | 1    | 1.14 | 0.61 |
| ENSMUSG00000025050 | <i>Pcgf6</i>        | 2.79 | 2.55 | 2.37 | 2.52 |
| ENSMUSG00000025059 | <i>Gyk</i>          | 5.11 | 4.6  | 4.63 | 4.41 |
| ENSMUSG00000025060 | <i>Slk</i>          | 3.79 | 3.46 | 3.36 | 3.26 |
| ENSMUSG00000025066 | <i>6330577E15Ri</i> | 5.13 | 4.35 | 4.89 | 4.63 |
| ENSMUSG00000025068 | <i>Gsto1</i>        | 7.22 | 6.58 | 6.89 | 6.6  |
| ENSMUSG00000025075 | <i>Habp2</i>        | 6.74 | 6.68 | 6.79 | 6.66 |
| ENSMUSG00000025076 | <i>Casp7</i>        | 4.16 | 3.79 | 4.12 | 3.59 |
| ENSMUSG00000025077 | <i>Dclre1a</i>      | 2.24 | 1.92 | 2.74 | 2.41 |
| ENSMUSG00000025078 | <i>Nhlrc2</i>       | 2.69 | 2.38 | 2.86 | 2.51 |
| ENSMUSG00000025085 | <i>Ablim1</i>       | 2.29 | 1.72 | 2.55 | 2    |
| ENSMUSG00000025086 | <i>Trub1</i>        | 2.52 | 3.05 | 3.26 | 2.67 |
| ENSMUSG00000025089 | <i>Gfra1</i>        | 6.51 | 5.92 | 6.49 | 5.87 |

|                    |                      |      |      |      |      |
|--------------------|----------------------|------|------|------|------|
| ENSMUSG00000025102 | <i>3110040N11Ri</i>  | 3.17 | 3.38 | 3.28 | 3.23 |
| ENSMUSG00000025103 | <i>Btbd1</i>         | 1.92 | 1.43 | 1.64 | 1.33 |
| ENSMUSG00000025127 | <i>Gcgr</i>          | 6.1  | 6.62 | 6.32 | 6.27 |
| ENSMUSG00000025130 | <i>P4hb</i>          | 9.18 | 9.53 | 9.07 | 9.01 |
| ENSMUSG00000025132 | <i>Arhgdia</i>       | 5.39 | 6.41 | 5.5  | 5.67 |
| ENSMUSG00000025133 | <i>Ints4</i>         | 3.45 | 3.43 | 3.52 | 3.18 |
| ENSMUSG00000025134 | <i>Thoc4</i>         | 3.09 | 3.23 | 3.37 | 2.88 |
| ENSMUSG00000025135 | <i>Anapc11</i>       | 1.93 | 2.77 | 2.62 | 2.49 |
| ENSMUSG00000025137 | <i>Pcyt2</i>         | 6.96 | 7.5  | 7.02 | 6.97 |
| ENSMUSG00000025138 | <i>Sirt7</i>         | 4.03 | 4.79 | 4.63 | 4.15 |
| ENSMUSG00000025139 | <i>Tollip</i>        | 4.84 | 4.63 | 4.58 | 4.41 |
| ENSMUSG00000025142 | <i>Aspscr1</i>       | 5.37 | 6.21 | 6.12 | 5.81 |
| ENSMUSG00000025144 | <i>Stra13</i>        | 4.92 | 5.22 | 5.2  | 5.02 |
| ENSMUSG00000025145 | <i>Lrrc45</i>        | 0.81 | 1.65 | 1.59 | 1.38 |
| ENSMUSG00000025147 | <i>Mmh</i>           | 3.86 | 4.43 | 4.16 | 4    |
| ENSMUSG00000025151 | <i>Maged1</i>        | 5.69 | 5.88 | 5.29 | 5.61 |
| ENSMUSG00000025153 | <i>Fasn</i>          | 5.58 | 5.49 | 5.78 | 5.65 |
| ENSMUSG00000025155 | <i>Dus11</i>         | 4.78 | 5.2  | 5.23 | 4.93 |
| ENSMUSG00000025156 | <i>Gps1</i>          | 1.42 | 2.16 | 1.77 | 1.52 |
| ENSMUSG00000025157 | <i>Zdhhc16</i>       | 3.06 | 3.34 | 3.17 | 3.04 |
| ENSMUSG00000025158 | <i>Rfng</i>          | 3.64 | 4.08 | 3.75 | 3.5  |
| ENSMUSG00000025159 | <i>Mms19</i>         | 3.12 | 3.17 | 3.46 | 3.22 |
| ENSMUSG00000025162 | <i>Csnk1d</i>        | 4.77 | 4.98 | 4.6  | 4.48 |
| ENSMUSG00000025169 | <i>1110031102Rik</i> | 2.89 | 2.99 | 3.03 | 3.08 |
| ENSMUSG00000025171 | <i>Ubtd1</i>         | 2.64 | 3.12 | 2.72 | 2.65 |
| ENSMUSG00000025173 | <i>Wdr45l</i>        | 4.23 | 3.56 | 3.6  | 3.67 |
| ENSMUSG00000025175 | <i>Fn3k</i>          | 2.98 | 3.83 | 3.92 | 3.6  |
| ENSMUSG00000025176 | <i>0610010D20Ri</i>  | 6.47 | 6.69 | 6.38 | 6.31 |
| ENSMUSG00000025178 | <i>Pi4k2a</i>        | 4.23 | 4.82 | 4.62 | 4.38 |
| ENSMUSG00000025184 | <i>D19Erttd386e</i>  | 3.14 | 2.88 | 2.69 | 2.4  |
| ENSMUSG00000025188 | <i>ep</i>            | 1.09 | 1.83 | 1.34 | 1.36 |

|                    |                  |      |      |      |      |
|--------------------|------------------|------|------|------|------|
| ENSMUSG00000025190 | <i>Got1</i>      | 8.91 | 8.36 | 8.72 | 8.21 |
| ENSMUSG00000025193 | <i>Cutc</i>      | 3.81 | 2.99 | 3.56 | 3.08 |
| ENSMUSG00000025194 | <i>Abcc2</i>     | 6.3  | 5.86 | 5.93 | 5.93 |
| ENSMUSG00000025195 | <i>Dnmbp</i>     | 2.92 | 2.89 | 3.04 | 3.09 |
| ENSMUSG00000025196 | <i>Cpn1</i>      | 7.88 | 8.22 | 7.96 | 7.96 |
| ENSMUSG00000025197 | <i>Cyp2c44</i>   | 8.03 | 8.25 | 7.99 | 8.23 |
| ENSMUSG00000025198 | <i>Erlin1</i>    | 4.55 | 4.37 | 4.4  | 4.13 |
| ENSMUSG00000025199 | <i>Chuk</i>      | 5.45 | 4.6  | 5.28 | 4.66 |
| ENSMUSG00000025200 | <i>Cwf1911</i>   | 3.89 | 3.5  | 3.92 | 3.68 |
| ENSMUSG00000025204 | <i>Ndufb8</i>    | 7.19 | 7.52 | 7.53 | 7.1  |
| ENSMUSG00000025207 | <i>Sema4g</i>    | 6.55 | 7.18 | 6.93 | 6.81 |
| ENSMUSG00000025208 | <i>Mrpl43</i>    | 4.61 | 4.75 | 4.84 | 4.93 |
| ENSMUSG00000025209 | <i>Peo1</i>      | 3.88 | 4.38 | 3.96 | 3.65 |
| ENSMUSG00000025217 | <i>mKIAA4123</i> | 2.54 | 2.2  | 2.53 | 2.1  |
| ENSMUSG00000025218 | <i>Poll</i>      | 1.95 | 2.51 | 2.17 | 2.01 |
| ENSMUSG00000025220 | <i>Mgea5</i>     | 4.28 | 3.74 | 4.22 | 3.42 |
| ENSMUSG00000025223 | <i>Ldb1</i>      | 3.57 | 4.07 | 4.02 | 4.02 |
| ENSMUSG00000025224 | <i>Gbfl</i>      | 3.86 | 4.36 | 3.97 | 3.87 |
| ENSMUSG00000025225 | <i>Nfkb2</i>     | 1.4  | 1.68 | 1.99 | 1.58 |
| ENSMUSG00000025226 | <i>Fbxl15</i>    | 2.19 | 2.57 | 2.61 | 2.06 |
| ENSMUSG00000025227 | <i>Tmem180</i>   | 2.08 | 2.29 | 2.21 | 2.29 |
| ENSMUSG00000025228 | <i>Actr1a</i>    | 4.97 | 5.39 | 5.23 | 5.01 |
| ENSMUSG00000025232 | <i>Hexa</i>      | 4.61 | 5.27 | 4.99 | 4.85 |
| ENSMUSG00000025234 | <i>Arih1</i>     | 4.67 | 3.98 | 4.31 | 3.93 |
| ENSMUSG00000025236 | <i>Adpgk</i>     | 3.12 | 3.25 | 3.67 | 3.27 |
| ENSMUSG00000025237 | <i>Parp6</i>     | 3.31 | 3.22 | 3.43 | 3.18 |
| ENSMUSG00000025239 | <i>limd1</i>     | 3.88 | 3.86 | 3.77 | 3.59 |
| ENSMUSG00000025240 | <i>Sacm11</i>    | 5.04 | 4.27 | 4.7  | 4.36 |
| ENSMUSG00000025241 | <i>Fycol</i>     | 3.31 | 3.14 | 3.38 | 3.13 |
| ENSMUSG00000025245 | <i>Lztfl1</i>    | 1.47 | 0.15 | 0.98 | 0.54 |
| ENSMUSG00000025246 | <i>Tbllx</i>     | 4    | 3.58 | 3.54 | 3.42 |

|                    |                  |      |      |      |      |
|--------------------|------------------|------|------|------|------|
| ENSMUSG00000025255 | <i>Zfx4</i>      | 1.38 | 1.06 | 1.3  | 0.57 |
| ENSMUSG00000025260 | <i>Hsd17b10</i>  | 7.35 | 7.3  | 7.19 | 6.88 |
| ENSMUSG00000025261 | <i>Mule</i>      | 4.14 | 4.22 | 4.18 | 3.87 |
| ENSMUSG00000025262 | <i>ORF34</i>     | 1.39 | 0.71 | 1.01 | 0.54 |
| ENSMUSG00000025264 | <i>Tsr2</i>      | 2.72 | 2.1  | 2.14 | 2.11 |
| ENSMUSG00000025266 | <i>Gnl3l</i>     | 2.73 | 2.68 | 2.85 | 2.59 |
| ENSMUSG00000025268 | <i>Maged2</i>    | 1.04 | 1.61 | 1.22 | 1.36 |
| ENSMUSG00000025270 | <i>Alas2</i>     | 3.1  | 4.19 | 4.27 | 4.53 |
| ENSMUSG00000025271 | <i>Pfkfb1</i>    | 5.14 | 4.79 | 4.91 | 4.58 |
| ENSMUSG00000025277 | <i>Abhd6</i>     | 4.47 | 4.41 | 4.08 | 4.14 |
| ENSMUSG00000025278 | <i>Flnb</i>      | 3    | 3.57 | 3.34 | 3.5  |
| ENSMUSG00000025279 | <i>Dnase1l3</i>  | 5.5  | 5.66 | 5.31 | 5.33 |
| ENSMUSG00000025280 | <i>Polr3a</i>    | 1.8  | 2.18 | 2.39 | 1.78 |
| ENSMUSG00000025283 | <i>Sat1</i>      | 4.03 | 3.65 | 3.8  | 3.5  |
| ENSMUSG00000025289 | <i>Prdx4</i>     | 6.46 | 5.8  | 6.09 | 5.86 |
| ENSMUSG00000025290 | <i>Rps24</i>     | 3.8  | 2.88 | 3.65 | 3.08 |
| ENSMUSG00000025314 | <i>Ptprj</i>     | 3.26 | 2.95 | 2.94 | 2.6  |
| ENSMUSG00000025316 | <i>Banp</i>      | 2.07 | 3.17 | 2.57 | 2.39 |
| ENSMUSG00000025317 | <i>Car5a</i>     | 6.93 | 6.93 | 7.1  | 6.66 |
| ENSMUSG00000025326 | <i>mKIAA4216</i> | 4.43 | 2.92 | 3.84 | 3.13 |
| ENSMUSG00000025332 | <i>Jarid1c</i>   | 4.37 | 4.87 | 4.44 | 4.37 |
| ENSMUSG00000025337 | <i>Sbds</i>      | 4.43 | 4.61 | 4.73 | 4.67 |
| ENSMUSG00000025340 | <i>Rabgef1</i>   | 3.57 | 3.17 | 3.34 | 3    |
| ENSMUSG00000025347 | <i>Mettl7b</i>   | 8.88 | 9.37 | 8.86 | 8.81 |
| ENSMUSG00000025348 | <i>Itga7</i>     | 1.24 | 1.8  | 2.04 | 1.52 |
| ENSMUSG00000025349 | <i>Bloc1s1</i>   | 4.28 | 5.07 | 5.08 | 4.42 |
| ENSMUSG00000025350 | <i>Rdh5</i>      | 3.76 | 4.24 | 4.6  | 4.2  |
| ENSMUSG00000025353 | <i>Ormdl2</i>    | 5.37 | 5.66 | 5.17 | 4.98 |
| ENSMUSG00000025354 | <i>Dnajc14</i>   | 4.32 | 4.36 | 4.25 | 3.97 |
| ENSMUSG00000025355 | <i>Mmp19</i>     | 5.6  | 5.25 | 5.25 | 4.84 |
| ENSMUSG00000025357 | <i>Dgka</i>      | 2.34 | 1.87 | 2.42 | 1.95 |

|                    |                      |      |      |      |      |
|--------------------|----------------------|------|------|------|------|
| ENSMUSG00000025358 | <i>Cdk2</i>          | 2.46 | 2.26 | 2.15 | 2.34 |
| ENSMUSG00000025362 | <i>Rps26</i>         | 5.47 | 5.72 | 5.81 | 5.86 |
| ENSMUSG00000025364 | <i>Pa2g4</i>         | 5.55 | 5.31 | 5.55 | 5.49 |
| ENSMUSG00000025366 | <i>Mbc2</i>          | 2.19 | 3.1  | 2.51 | 2.52 |
| ENSMUSG00000025369 | <i>Smarcc2</i>       | 4.94 | 5.05 | 5.13 | 5    |
| ENSMUSG00000025371 | <i>Chmp6</i>         | 3.26 | 3.86 | 3.18 | 3.45 |
| ENSMUSG00000025372 | <i>Baiap2</i>        | 3.29 | 4.45 | 3.62 | 3.37 |
| ENSMUSG00000025373 | <i>Rnf41</i>         | 1.76 | 2.01 | 1.92 | 1.66 |
| ENSMUSG00000025374 | <i>Obfc2b</i>        | 5.24 | 5.27 | 5.45 | 5.21 |
| ENSMUSG00000025377 | <i>2410002I01Rik</i> | 2.2  | 2.79 | 2.82 | 2.32 |
| ENSMUSG00000025379 | <i>NA</i>            | 1.21 | 1.96 | 1.67 | 1.94 |
| ENSMUSG00000025381 | <i>Tmem4</i>         | 5.9  | 5.88 | 5.66 | 5.59 |
| ENSMUSG00000025384 | <i>2310003H01Rik</i> | 0.84 | 1.91 | 1.55 | 1.11 |
| ENSMUSG00000025393 | <i>Atp5b</i>         | 9.75 | 9.66 | 9.73 | 9.42 |
| ENSMUSG00000025395 | <i>Prim1</i>         | 1.35 | 1.19 | 1.08 | 0.36 |
| ENSMUSG00000025396 | <i>Hsd17b6</i>       | 7.84 | 8.02 | 7.89 | 8.24 |
| ENSMUSG00000025402 | <i>Nab2</i>          | 2.59 | 3.53 | 3.21 | 2.76 |
| ENSMUSG00000025403 | <i>Shmt2</i>         | 6.89 | 7.47 | 7.34 | 7.07 |
| ENSMUSG00000025404 | <i>R3hdm2</i>        | 5    | 5.21 | 5.24 | 4.99 |
| ENSMUSG00000025405 | <i>Inhbc</i>         | 5.42 | 6.17 | 5.49 | 6.03 |
| ENSMUSG00000025408 | <i>Ddit3</i>         | 1.5  | 2.8  | 2.59 | 2.79 |
| ENSMUSG00000025409 | <i>Mbd6</i>          | 2.73 | 3.62 | 3.37 | 3.15 |
| ENSMUSG00000025410 | <i>Dctn2</i>         | 5.74 | 6.33 | 6.11 | 5.95 |
| ENSMUSG00000025413 | <i>Ttc4</i>          | 3.42 | 3.25 | 3.72 | 3.39 |
| ENSMUSG00000025417 | <i>Pip4k2c</i>       | 3.63 | 3.78 | 3.76 | 3.71 |
| ENSMUSG00000025421 | <i>Ier3ip1</i>       | 3.98 | 3.44 | 3.84 | 3.3  |
| ENSMUSG00000025423 | <i>Pias2</i>         | 3.99 | 3.61 | 3.96 | 3.76 |
| ENSMUSG00000025428 | <i>Atp5a1</i>        | 8.59 | 8.75 | 8.73 | 8.41 |
| ENSMUSG00000025429 | <i>Pstpip2</i>       | 2.3  | 1.6  | 1.86 | 1.78 |
| ENSMUSG00000025436 | <i>Xrcc6bp1</i>      | 0.56 | 1.73 | 1.26 | 0.77 |
| ENSMUSG00000025437 | <i>Vdul</i>          | 4.18 | 3    | 3.76 | 3.36 |



|                    |                     |       |       |       |       |
|--------------------|---------------------|-------|-------|-------|-------|
| ENSMUSG00000025439 | <i>Clns1a</i>       | 4.05  | 3.96  | 3.97  | 3.84  |
| ENSMUSG00000025451 | <i>Paip1</i>        | 3.9   | 3.04  | 3.66  | 2.95  |
| ENSMUSG00000025453 | <i>Nnt</i>          | 5.53  | 4.57  | 4.92  | 4.6   |
| ENSMUSG00000025464 | <i>Paox</i>         | 1.57  | 1.48  | 1.46  | 1.26  |
| ENSMUSG00000025465 | <i>Echs1</i>        | 8.04  | 7.62  | 7.77  | 7.39  |
| ENSMUSG00000025466 | <i>I810014F10Ri</i> | 3.59  | 3.23  | 3.62  | 3.66  |
| ENSMUSG00000025470 | <i>NA</i>           | 1.67  | 2.9   | 2.49  | 2.25  |
| ENSMUSG00000025474 | <i>Tubgcp2</i>      | 2.73  | 2.74  | 2.38  | 1.85  |
| ENSMUSG00000025477 | <i>Inpp5a</i>       | 3.59  | 3.49  | 3.49  | 3.42  |
| ENSMUSG00000025479 | <i>Cyp2e1</i>       | 12.32 | 11.54 | 12.03 | 11.87 |
| ENSMUSG00000025481 | <i>I190003J15Ri</i> | 7.63  | 7.33  | 7.66  | 7.52  |
| ENSMUSG00000025484 | <i>Bet1l</i>        | 4.21  | 4.53  | 3.82  | 3.72  |
| ENSMUSG00000025485 | <i>Ric8</i>         | 3.18  | 3.83  | 3.66  | 3.55  |
| ENSMUSG00000025486 | <i>Sirt3</i>        | 5.39  | 5.89  | 5.93  | 5.99  |
| ENSMUSG00000025487 | <i>Psmc13</i>       | 5.78  | 5.57  | 5.6   | 5.41  |
| ENSMUSG00000025491 | <i>Ifitm1</i>       | 2.43  | 2.55  | 2.81  | 1.83  |
| ENSMUSG00000025492 | <i>Ifitm3</i>       | 8.74  | 8.81  | 8.88  | 8.75  |
| ENSMUSG00000025494 | <i>Sigirr</i>       | 3.82  | 4.36  | 4.11  | 4.06  |
| ENSMUSG00000025495 | <i>Ptdss2</i>       | 2.59  | 2.78  | 2.74  | 2.51  |
| ENSMUSG00000025497 | <i>Mupcdh</i>       | 5.14  | 6.05  | 5.77  | 5.56  |
| ENSMUSG00000025498 | <i>Irf7</i>         | 3.48  | 3.47  | 2.18  | 3.61  |
| ENSMUSG00000025499 | <i>Hras1</i>        | 3.16  | 3.65  | 3.28  | 3.18  |
| ENSMUSG00000025503 | <i>Taldo1</i>       | 5.79  | 6.08  | 6     | 5.61  |
| ENSMUSG00000025504 | <i>Eps8l2</i>       | 4.57  | 5.25  | 5     | 4.78  |
| ENSMUSG00000025505 | <i>Tmem80</i>       | 1.03  | 1.14  | 1.52  | 1.61  |
| ENSMUSG00000025508 | <i>Rplp2</i>        | 2.03  | 2.61  | 2.32  | 2.27  |
| ENSMUSG00000025509 | <i>Pnpla2</i>       | 6.1   | 6.39  | 6.76  | 6.27  |
| ENSMUSG00000025510 | <i>Cd151</i>        | 4.46  | 5.16  | 4.93  | 4.9   |
| ENSMUSG00000025511 | <i>Tspan4</i>       | 4.21  | 4.62  | 4.45  | 4.54  |
| ENSMUSG00000025512 | <i>Chid1</i>        | 3.37  | 3.82  | 3.46  | 3.23  |
| ENSMUSG00000025521 | <i>3110005G23Ri</i> | 3.7   | 3.68  | 3.71  | 3.54  |

|                    |                     |      |       |      |      |
|--------------------|---------------------|------|-------|------|------|
| ENSMUSG00000025525 | <i>AK086522</i>     | 4.79 | 4.11  | 4.57 | 4.15 |
| ENSMUSG00000025531 | <i>Chm</i>          | 2.79 | 1.48  | 2.16 | 1.56 |
| ENSMUSG00000025532 | <i>Crcp</i>         | 5.23 | 4.79  | 5.37 | 5.04 |
| ENSMUSG00000025533 | <i>Asl</i>          | 8.56 | 8.5   | 9.26 | 8.73 |
| ENSMUSG00000025534 | <i>Gusb</i>         | 3.36 | 3.3   | 3.24 | 3.21 |
| ENSMUSG00000025538 | <i>Sumf2</i>        | 2.63 | 3.11  | 2.69 | 2.39 |
| ENSMUSG00000025544 | <i>Tm9sf2</i>       | 6.47 | 5.81  | 6.11 | 5.69 |
| ENSMUSG00000025545 | <i>Clybl</i>        | 5.42 | 5.15  | 5.47 | 4.98 |
| ENSMUSG00000025555 | <i>Farp1</i>        | 2    | 2.62  | 2.03 | 2.25 |
| ENSMUSG00000025558 | <i>mKIAA1058</i>    | 1.61 | 1.47  | 1.5  | 1.4  |
| ENSMUSG00000025571 | <i>Tnrc6c</i>       | 1.63 | 1.92  | 2.07 | 2.11 |
| ENSMUSG00000025572 | <i>Tmc6</i>         | 1.31 | 2.45  | 1.92 | 1.61 |
| ENSMUSG00000025574 | <i>Tkl</i>          | 2.88 | 3.23  | 3.01 | 2.99 |
| ENSMUSG00000025575 | <i>Cant1</i>        | 3.06 | 3.5   | 3.4  | 3.06 |
| ENSMUSG00000025577 | <i>Cbx2</i>         | 2.17 | 2.69  | 2.31 | 1.59 |
| ENSMUSG00000025578 | <i>Cbx8</i>         | 1.93 | 2.39  | 2    | 1.51 |
| ENSMUSG00000025579 | <i>Gaa</i>          | 5.11 | 5.97  | 5.41 | 5.27 |
| ENSMUSG00000025580 | <i>Eif4a3</i>       | 2.99 | 3.88  | 3.32 | 3.49 |
| ENSMUSG00000025583 | <i>Raptor</i>       | 3.59 | 3.91  | 3.51 | 3.51 |
| ENSMUSG00000025584 | <i>Pde8a</i>        | 3.99 | 3.82  | 4.08 | 3.99 |
| ENSMUSG00000025588 | <i>Nat1</i>         | 1.5  | -0.02 | 1.85 | 0.1  |
| ENSMUSG00000025591 | <i>1810029B16Ri</i> | 1.29 | 0.89  | 0.65 | 0.38 |
| ENSMUSG00000025607 | <i>Copg2</i>        | 3.69 | 3.49  | 3.38 | 3.01 |
| ENSMUSG00000025608 | <i>Podxl</i>        | 2.04 | 2.28  | 0.74 | 1.16 |
| ENSMUSG00000025609 | <i>Mkln1</i>        | 4.78 | 4.42  | 4.65 | 4.12 |
| ENSMUSG00000025612 | <i>Bach1</i>        | 3.3  | 2.74  | 3.07 | 3.16 |
| ENSMUSG00000025613 | <i>Cct8</i>         | 6.4  | 6.49  | 6.32 | 6.13 |
| ENSMUSG00000025616 | <i>Usp16</i>        | 4.37 | 3.71  | 3.98 | 3.55 |
| ENSMUSG00000025626 | <i>Phf6</i>         | 1.72 | 0.55  | 1.48 | 0.75 |
| ENSMUSG00000025630 | <i>Hprt1</i>        | 5.76 | 5.18  | 5.48 | 4.89 |
| ENSMUSG00000025645 | <i>Ccdc51</i>       | 1.72 | 2.7   | 2.38 | 1.71 |

|                    |                     |      |      |      |      |
|--------------------|---------------------|------|------|------|------|
| ENSMUSG00000025646 | <i>NA</i>           | 1.89 | 2.07 | 1.71 | 1.29 |
| ENSMUSG00000025647 | <i>Scotin</i>       | 4.27 | 4.28 | 4.4  | 4.01 |
| ENSMUSG00000025651 | <i>Uqcrc1</i>       | 7.73 | 8.11 | 8.05 | 7.64 |
| ENSMUSG00000025666 | <i>Tmem47</i>       | 1.59 | 0.38 | 1.07 | 0.43 |
| ENSMUSG00000025702 | <i>8-Mar</i>        | 5.09 | 5.04 | 4.88 | 4.63 |
| ENSMUSG00000025722 | <i>NA</i>           | 3.39 | 3.54 | 3.64 | 2.84 |
| ENSMUSG00000025724 | <i>Sec11a</i>       | 4.86 | 4.91 | 4.86 | 4.6  |
| ENSMUSG00000025728 | <i>Pigq</i>         | 4.4  | 4.68 | 4.55 | 4.32 |
| ENSMUSG00000025730 | <i>Rab40C</i>       | 2.61 | 3.45 | 2.52 | 2.51 |
| ENSMUSG00000025731 | <i>0610011F06Ri</i> | 6.55 | 7.06 | 6.75 | 6.95 |
| ENSMUSG00000025732 | <i>9530058B02Ri</i> | 4.82 | 5.37 | 5.24 | 5.06 |
| ENSMUSG00000025733 | <i>Rhot2</i>        | 4.08 | 4.74 | 4.52 | 4.44 |
| ENSMUSG00000025736 | <i>2610003J06Ri</i> | 5.61 | 6.03 | 5.47 | 5.55 |
| ENSMUSG00000025737 | <i>Wdr24</i>        | 2.84 | 3.44 | 3.03 | 2.96 |
| ENSMUSG00000025742 | <i>Prps2</i>        | 3.53 | 2.93 | 2.98 | 2.38 |
| ENSMUSG00000025743 | <i>Sdc3</i>         | 4.01 | 4.49 | 3.73 | 3.79 |
| ENSMUSG00000025745 | <i>Hadha</i>        | 7.65 | 7.67 | 7.75 | 7.52 |
| ENSMUSG00000025757 | <i>apg-1b</i>       | 3.73 | 3.1  | 3.27 | 3.27 |
| ENSMUSG00000025759 | <i>Mfsd8</i>        | 2.88 | 2.07 | 2.19 | 1.61 |
| ENSMUSG00000025764 | <i>Phf17</i>        | 3.53 | 3.71 | 3.85 | 3.71 |
| ENSMUSG00000025766 | <i>D3Erttd751e</i>  | 2.34 | 1.14 | 1.58 | 1.13 |
| ENSMUSG00000025779 | <i>Ly96</i>         | 3.55 | 2.89 | 3.52 | 2.75 |
| ENSMUSG00000025780 | <i>Itih5</i>        | 2.13 | 2.06 | 1.68 | 1.57 |
| ENSMUSG00000025781 | <i>Atp5c1</i>       | 6.56 | 6.49 | 6.77 | 6.34 |
| ENSMUSG00000025782 | <i>Taf3</i>         | 1.44 | 1.06 | 1.24 | 1.14 |
| ENSMUSG00000025785 | <i>Exosc7</i>       | 3.9  | 4.45 | 4.35 | 4.14 |
| ENSMUSG00000025786 | <i>GODZ</i>         | 3.68 | 3.53 | 3.2  | 3.3  |
| ENSMUSG00000025788 | <i>Chd2</i>         | 1.26 | 1.21 | 1.63 | 1.37 |
| ENSMUSG00000025791 | <i>Pgm2</i>         | 6.79 | 6.82 | 6.74 | 6.62 |
| ENSMUSG00000025792 | <i>Slc25a10</i>     | 6.91 | 7.02 | 6.96 | 6.6  |
| ENSMUSG00000025793 | <i>Hgs</i>          | 4.14 | 5.19 | 4.83 | 4.73 |

|                    |                     |      |      |      |      |
|--------------------|---------------------|------|------|------|------|
| ENSMUSG00000025794 | <i>Rpl14</i>        | 4.81 | 5.42 | 4.93 | 4.51 |
| ENSMUSG00000025795 | <i>Rassf3</i>       | 4.19 | 4.13 | 4.44 | 4.27 |
| ENSMUSG00000025809 | <i>Itgb1</i>        | 6.2  | 5.76 | 6.01 | 5.67 |
| ENSMUSG00000025810 | <i>Nrp1</i>         | 4.71 | 4.71 | 4.16 | 4.32 |
| ENSMUSG00000025812 | <i>Par3</i>         | 3.59 | 4.11 | 4.17 | 3.99 |
| ENSMUSG00000025813 | <i>Homer2</i>       | 3.85 | 3.97 | 3.8  | 3.94 |
| ENSMUSG00000025815 | <i>Dhtkd1</i>       | 6.06 | 5.56 | 5.94 | 5.56 |
| ENSMUSG00000025817 | <i>Nudt5</i>        | 3.52 | 3.15 | 3.59 | 3.03 |
| ENSMUSG00000025823 | <i>Pdia4</i>        | 6.93 | 7.11 | 6.19 | 6.38 |
| ENSMUSG00000025825 | <i>Iscu</i>         | 3.68 | 3.86 | 3.66 | 3.46 |
| ENSMUSG00000025854 | <i>BC004044</i>     | 3.26 | 4.54 | 4.2  | 4.29 |
| ENSMUSG00000025856 | <i>Pdgfa</i>        | 0.93 | 1.43 | 1.96 | 1.34 |
| ENSMUSG00000025857 | <i>Heatr2</i>       | 1.95 | 2.88 | 2.64 | 2.27 |
| ENSMUSG00000025858 | <i>1110007L15Ri</i> | 3.07 | 3.43 | 3.16 | 3.15 |
| ENSMUSG00000025860 | <i>Birc4</i>        | 4.95 | 3.82 | 4.31 | 3.69 |
| ENSMUSG00000025862 | <i>SAP2</i>         | 4.57 | 3.27 | 3.93 | 3.43 |
| ENSMUSG00000025868 | <i>Higd2a</i>       | 6.29 | 6.47 | 6.38 | 6.47 |
| ENSMUSG00000025869 | <i>D13Wsu177e</i>   | 4.95 | 4.98 | 4.84 | 4.65 |
| ENSMUSG00000025871 | <i>4833439L19Ri</i> | 4.85 | 4.75 | 5.21 | 4.85 |
| ENSMUSG00000025872 | <i>Thoc3</i>        | 3.73 | 4.13 | 3.84 | 3.52 |
| ENSMUSG00000025873 | <i>mKIAA0887</i>    | 4.63 | 4.69 | 4.78 | 4.53 |
| ENSMUSG00000025878 | <i>Uimc1</i>        | 3.08 | 2.82 | 3.02 | 2.55 |
| ENSMUSG00000025880 | <i>Smad7</i>        | 1.95 | 2.88 | 2.2  | 1.84 |
| ENSMUSG00000025885 | <i>Myo5b</i>        | 2.38 | 2.4  | 2.23 | 2.17 |
| ENSMUSG00000025894 | <i>Aasdhpt</i>      | 4.84 | 4.21 | 4.64 | 4.02 |
| ENSMUSG00000025898 | <i>Cwf19l2</i>      | 3.15 | 1.87 | 2.55 | 2.16 |
| ENSMUSG00000025899 | <i>Alkbh8</i>       | 2.17 | 0.84 | 1.59 | 1    |
| ENSMUSG00000025903 | <i>Lypla1</i>       | 7.04 | 5.58 | 6.33 | 5.74 |
| ENSMUSG00000025907 | <i>Rb1cc1</i>       | 3.69 | 2.36 | 3.3  | 2.46 |
| ENSMUSG00000025911 | <i>Adhfe1</i>       | 6.06 | 5.7  | 5.59 | 5.06 |
| ENSMUSG00000025915 | <i>Sgk3</i>         | 3.21 | 2.38 | 3.28 | 2.53 |

|                    |                     |       |       |       |      |
|--------------------|---------------------|-------|-------|-------|------|
| ENSMUSG00000025917 | <i>Cops5</i>        | 6.09  | 5.55  | 5.59  | 5.23 |
| ENSMUSG00000025920 | <i>Stau2</i>        | 1.16  | 0.34  | 0.79  | 0.16 |
| ENSMUSG00000025921 | <i>Rdh10</i>        | 4.23  | 3.97  | 3.95  | 3.93 |
| ENSMUSG00000025925 | <i>Terf1</i>        | 2.98  | 2.2   | 2.69  | 1.7  |
| ENSMUSG00000025933 | <i>Tmem14a</i>      | 0.99  | 0.79  | 1.37  | 1.61 |
| ENSMUSG00000025934 | <i>Gsta3</i>        | 10.17 | 10.02 | 9.86  | 9.68 |
| ENSMUSG00000025935 | <i>Tram1</i>        | 6.47  | 5.97  | 6.21  | 6.04 |
| ENSMUSG00000025937 | <i>Lactb2</i>       | 7.55  | 6.22  | 7.01  | 6.59 |
| ENSMUSG00000025939 | <i>Ube2w</i>        | 4.29  | 3.33  | 4     | 3.56 |
| ENSMUSG00000025940 | <i>Tmem70</i>       | 5.12  | 4.52  | 4.95  | 4.58 |
| ENSMUSG00000025949 | <i>Pip5k3</i>       | 1.66  | 1     | 1.64  | 1.11 |
| ENSMUSG00000025950 | <i>Idh1</i>         | 8.11  | 7.38  | 7.52  | 7.08 |
| ENSMUSG00000025956 | <i>2310038H17R1</i> | 1.86  | 1.3   | 1.9   | 1.5  |
| ENSMUSG00000025958 | <i>Creb1</i>        | 2.16  | 1.58  | 1.79  | 1.39 |
| ENSMUSG00000025962 | <i>Fastkd2</i>      | 2.74  | 2.42  | 2.65  | 2.16 |
| ENSMUSG00000025964 | <i>Adam23</i>       | 2.23  | 2.2   | 2.06  | 1.94 |
| ENSMUSG00000025967 | <i>Eef1b2</i>       | 7.05  | 7.12  | 6.93  | 6.67 |
| ENSMUSG00000025968 | <i>Ndufs1</i>       | 6.43  | 5.87  | 6.33  | 5.83 |
| ENSMUSG00000025969 | <i>Nrp2</i>         | 2.46  | 2.15  | 2.37  | 2.01 |
| ENSMUSG00000025971 | <i>9430016H08R1</i> | 4.1   | 3.83  | 4.05  | 3.42 |
| ENSMUSG00000025979 | <i>Mobkl3</i>       | 4.65  | 3.56  | 3.96  | 3.39 |
| ENSMUSG00000025980 | <i>Hspd1</i>        | 5.8   | 5.45  | 5.62  | 5.2  |
| ENSMUSG00000025981 | <i>Coq10b</i>       | 3.17  | 2.25  | 4.22  | 3.86 |
| ENSMUSG00000025982 | <i>Sf3b1</i>        | 4.97  | 4.34  | 4.7   | 4.28 |
| ENSMUSG00000025991 | <i>Cps1</i>         | 9.96  | 10    | 10.23 | 9.94 |
| ENSMUSG00000025993 | <i>Slc40a1</i>      | 6.29  | 5.33  | 6.26  | 5.71 |
| ENSMUSG00000025995 | <i>Wdr75</i>        | 2.8   | 2.44  | 2.43  | 2.39 |
| ENSMUSG00000026000 | <i>Lancl1</i>       | 2.42  | 2.77  | 2.44  | 2.46 |
| ENSMUSG00000026003 | <i>Acadl</i>        | 7.81  | 7.22  | 7.56  | 7.03 |
| ENSMUSG00000026004 | <i>1110028C15R1</i> | 2.63  | 1.08  | 2.24  | 1.73 |
| ENSMUSG00000026005 | <i>Rpe</i>          | 4.58  | 3.33  | 3.9   | 3.69 |

|                    |                  |      |      |       |       |
|--------------------|------------------|------|------|-------|-------|
| ENSMUSG00000026014 | <i>Raph1</i>     | 3.48 | 3.27 | 3.04  | 3.31  |
| ENSMUSG00000026019 | <i>Wdr12</i>     | 1.42 | 0.93 | 0.92  | 1.24  |
| ENSMUSG00000026020 | <i>Nol5</i>      | 3.56 | 3.1  | 2.72  | 2.87  |
| ENSMUSG00000026021 | <i>Sumo1</i>     | 3.21 | 2.27 | 3.41  | 3.24  |
| ENSMUSG00000026024 | <i>Als2</i>      | 4.68 | 4.95 | 4.46  | 4.32  |
| ENSMUSG00000026027 | <i>PAPK-A</i>    | 4.48 | 3.97 | 4.45  | 4.03  |
| ENSMUSG00000026028 | <i>Trak2</i>     | 2.59 | 2.35 | 2.79  | 2.53  |
| ENSMUSG00000026029 | <i>Casp8</i>     | 4.5  | 4.2  | 4.17  | 3.93  |
| ENSMUSG00000026031 | <i>Cflar</i>     | 4.07 | 3.51 | 3.85  | 3.55  |
| ENSMUSG00000026032 | <i>Ndufb3</i>    | 5.65 | 4.5  | 5.45  | 5.01  |
| ENSMUSG00000026034 | <i>Clk1</i>      | 4.89 | 3.81 | 5.36  | 4.78  |
| ENSMUSG00000026035 | <i>Ppil3</i>     | 2.46 | 1.71 | 2.47  | 2.19  |
| ENSMUSG00000026036 | <i>Nif3l1</i>    | 2.53 | 2.81 | 2.52  | 2.66  |
| ENSMUSG00000026037 | <i>Orc2l</i>     | 1.99 | 1.36 | 1.66  | 0.63  |
| ENSMUSG00000026043 | <i>mKIAA4231</i> | 2.24 | 2.27 | 1.59  | 1.79  |
| ENSMUSG00000026047 | <i>Kdelc1</i>    | 1.96 | 1.32 | 2.12  | 2.03  |
| ENSMUSG00000026048 | <i>AK163166</i>  | 2.49 | 1.87 | 2.36  | 1.94  |
| ENSMUSG00000026049 | <i>NA</i>        | 2.68 | 1.19 | 2.14  | 1.24  |
| ENSMUSG00000026064 | <i>Ptp4a1</i>    | 2.6  | 0.54 | 2.32  | 1.7   |
| ENSMUSG00000026072 | <i>Il1r1</i>     | 3.49 | 3.7  | 2.88  | 3.66  |
| ENSMUSG00000026074 | <i>Map4k4</i>    | 1.59 | 1.5  | 1.41  | 1.06  |
| ENSMUSG00000026077 | <i>Npas2</i>     | 2.06 | 2.19 | -1.06 | -1.83 |
| ENSMUSG00000026078 | <i>Pdcl3</i>     | 4.01 | 4.32 | 4.1   | 3.91  |
| ENSMUSG00000026082 | <i>Rev1</i>      | 1.94 | 1.78 | 2.11  | 2.14  |
| ENSMUSG00000026083 | <i>Eif5b</i>     | 4.73 | 4.48 | 4.39  | 3.94  |
| ENSMUSG00000026087 | <i>Mrpl30</i>    | 5.37 | 5.11 | 5.34  | 5.14  |
| ENSMUSG00000026088 | <i>Mitd1</i>     | 3.03 | 2.48 | 2.34  | 2.6   |
| ENSMUSG00000026094 | <i>Stk17b</i>    | 2.26 | 1.22 | 1.94  | 0.87  |
| ENSMUSG00000026095 | <i>Asnsd1</i>    | 5.01 | 4.43 | 4.45  | 4.03  |
| ENSMUSG00000026096 | <i>Osgepl1</i>   | 3.61 | 2.69 | 3.23  | 2.72  |
| ENSMUSG00000026097 | <i>Ormdl1</i>    | 4.41 | 3.31 | 3.86  | 3.34  |

|                    |                     |      |      |      |      |
|--------------------|---------------------|------|------|------|------|
| ENSMUSG00000026102 | <i>Inpp1</i>        | 2.51 | 2.35 | 2.61 | 2.14 |
| ENSMUSG00000026104 | <i>Stat1</i>        | 4.59 | 3.35 | 3.82 | 3.83 |
| ENSMUSG00000026107 | <i>Nabp1</i>        | 2.55 | 0.92 | 2.41 | 2.25 |
| ENSMUSG00000026111 | <i>Unc50</i>        | 4.42 | 4.35 | 4.33 | 4.11 |
| ENSMUSG00000026112 | <i>6330578E17Ri</i> | 5.14 | 4.8  | 5.01 | 4.76 |
| ENSMUSG00000026113 | <i>AK051424</i>     | 2.55 | 2.43 | 2.67 | 2.27 |
| ENSMUSG00000026116 | <i>Tmem131</i>      | 3.89 | 3.06 | 3.81 | 3.18 |
| ENSMUSG00000026117 | <i>Zap70</i>        | 2.38 | 3.02 | 2.81 | 2.41 |
| ENSMUSG00000026123 | <i>Plekhb2</i>      | 1.51 | 1.3  | 1.04 | 0.98 |
| ENSMUSG00000026127 | <i>Imp4</i>         | 4.59 | 4.83 | 4.51 | 4.39 |
| ENSMUSG00000026131 | <i>Bpagl</i>        | 2.11 | 1.98 | 2.45 | 2.16 |
| ENSMUSG00000026142 | <i>Rhbddl</i>       | 3.54 | 3.65 | 3.35 | 3.3  |
| ENSMUSG00000026150 | <i>5230400G24Ri</i> | 4.58 | 4.06 | 4.57 | 4.01 |
| ENSMUSG00000026153 | <i>4921533L14Ri</i> | 2.78 | 1.83 | 2.76 | 2.49 |
| ENSMUSG00000026154 | <i>1110058L19Ri</i> | 4.68 | 4.3  | 4.5  | 4.11 |
| ENSMUSG00000026155 | <i>Smap1</i>        | 4.78 | 4.17 | 4.47 | 3.74 |
| ENSMUSG00000026156 | <i>B3gat2</i>       | 2.82 | 2.49 | 2.68 | 1.98 |
| ENSMUSG00000026158 | <i>Ogfr11</i>       | 2.67 | 2.24 | 2.29 | 1.67 |
| ENSMUSG00000026159 | <i>Hrb</i>          | 3.14 | 2.68 | 3.01 | 2.73 |
| ENSMUSG00000026162 | <i>Nhej1</i>        | 1.36 | 0.65 | 1.64 | 1.29 |
| ENSMUSG00000026170 | <i>Cyp27a1</i>      | 8.06 | 8.06 | 8.13 | 7.78 |
| ENSMUSG00000026171 | <i>Rnf25</i>        | 3.64 | 4.15 | 3.56 | 3.58 |
| ENSMUSG00000026172 | <i>Bcs11</i>        | 3.6  | 3.63 | 3.6  | 3.18 |
| ENSMUSG00000026174 | <i>Rqcd1</i>        | 3.3  | 3.31 | 3.18 | 3    |
| ENSMUSG00000026176 | <i>Ctdsp1</i>       | 6.51 | 6.93 | 6.73 | 6.7  |
| ENSMUSG00000026177 | <i>Slc11a1</i>      | 1.76 | 2.31 | 1.64 | 1.38 |
| ENSMUSG00000026179 | <i>Pnkd</i>         | 5.97 | 6.27 | 6.16 | 5.78 |
| ENSMUSG00000026181 | <i>Ppm1f</i>        | 3.38 | 3.46 | 3.12 | 2.73 |
| ENSMUSG00000026185 | <i>Igfbp5</i>       | 1.64 | 1.82 | 1.42 | 1.59 |
| ENSMUSG00000026187 | <i>Xrcc5</i>        | 3.68 | 3.47 | 3.43 | 3.15 |
| ENSMUSG00000026189 | <i>Pecr</i>         | 7.94 | 7.99 | 7.81 | 7.52 |

|                    |                |      |      |      |      |
|--------------------|----------------|------|------|------|------|
| ENSMUSG00000026192 | <i>Atic</i>    | 3.8  | 4.28 | 3.79 | 3.7  |
| ENSMUSG00000026193 | <i>Fn1</i>     | 7.82 | 8.36 | 8.08 | 8.07 |
| ENSMUSG00000026197 | <i>Zfand2b</i> | 4.11 | 4.42 | 4.61 | 4.23 |
| ENSMUSG00000026198 | <i>Abcb6</i>   | 5.35 | 5.61 | 5.37 | 5.17 |
| ENSMUSG00000026199 | <i>Ankzfl</i>  | 2.71 | 2.83 | 2.87 | 2.56 |
| ENSMUSG00000026200 | <i>NA</i>      | 0.79 | 1.15 | 1.09 | 0.53 |
| ENSMUSG00000026201 | <i>Stk16</i>   | 5.09 | 5.19 | 4.9  | 4.83 |
| ENSMUSG00000026202 | <i>Tuba4a</i>  | 7    | 7.58 | 6.76 | 6.93 |
| ENSMUSG00000026203 | <i>Dnajb10</i> | 4.33 | 4.94 | 4.4  | 4.46 |
| ENSMUSG00000026208 | <i>Des</i>     | 1.38 | 1.86 | 2.54 | 2.54 |
| ENSMUSG00000026209 | <i>Dnpep</i>   | 4.55 | 5.41 | 4.91 | 4.59 |
| ENSMUSG00000026213 | <i>Stk11ip</i> | 0.87 | 1.76 | 1.39 | 1.18 |
| ENSMUSG00000026219 | <i>Trip12</i>  | 4.66 | 3.95 | 4.44 | 3.99 |
| ENSMUSG00000026222 | <i>Sp100</i>   | 2.28 | 1.54 | 2.07 | 1.85 |
| ENSMUSG00000026223 | <i>Itm2c</i>   | 4.07 | 4.9  | 4.02 | 4.14 |
| ENSMUSG00000026227 | <i>NA</i>      | 4.79 | 5.39 | 4.8  | 4.81 |
| ENSMUSG00000026229 | <i>Psmc1</i>   | 6.23 | 6.24 | 5.95 | 5.73 |
| ENSMUSG00000026234 | <i>Ncl</i>     | 6.48 | 5.86 | 6.07 | 5.64 |
| ENSMUSG00000026238 | <i>Ptma</i>    | 1.84 | 1.16 | 1.44 | 1.43 |
| ENSMUSG00000026239 | <i>Pde6d</i>   | 2.68 | 2.36 | 2.77 | 2.15 |
| ENSMUSG00000026240 | <i>Cops7b</i>  | 2    | 2.39 | 2.17 | 2.27 |
| ENSMUSG00000026245 | <i>Farsb</i>   | 4.93 | 4.65 | 4.59 | 4.19 |
| ENSMUSG00000026248 | <i>Mrpl44</i>  | 4.34 | 4.56 | 4.55 | 4.43 |
| ENSMUSG00000026254 | <i>Eif4e2</i>  | 3.25 | 3.18 | 3.29 | 3.22 |
| ENSMUSG00000026259 | <i>Ngef</i>    | 3.73 | 4.07 | 4.37 | 4.09 |
| ENSMUSG00000026260 | <i>Ndufa10</i> | 7.3  | 7.22 | 7.39 | 7.07 |
| ENSMUSG00000026269 | <i>Rnpepl1</i> | 5.37 | 6.45 | 5.62 | 5.57 |
| ENSMUSG00000026270 | <i>Capn10</i>  | 3.76 | 4.39 | 3.9  | 3.77 |
| ENSMUSG00000026272 | <i>Agxt</i>    | 8.09 | 8.49 | 8.33 | 7.93 |
| ENSMUSG00000026273 | <i>Mterfd2</i> | 2.59 | 2.49 | 2.81 | 2.8  |
| ENSMUSG00000026275 | <i>Ppp1r7</i>  | 4.43 | 4.22 | 4.04 | 3.58 |



|                    |                     |      |      |      |      |
|--------------------|---------------------|------|------|------|------|
| ENSMUSG00000026276 | <i>2-Sep</i>        | 5.37 | 4.53 | 5.1  | 4.52 |
| ENSMUSG00000026277 | <i>Stk25</i>        | 4.13 | 4.39 | 4.27 | 4.21 |
| ENSMUSG00000026278 | <i>Bok</i>          | 1.51 | 2.21 | 1.67 | 1.7  |
| ENSMUSG00000026279 | <i>Thap4</i>        | 1.55 | 1.98 | 1.83 | 1.55 |
| ENSMUSG00000026280 | <i>Atg4b</i>        | 4    | 4.32 | 4.2  | 4.19 |
| ENSMUSG00000026281 | <i>Dtymk</i>        | 3.13 | 2.39 | 2.39 | 2.41 |
| ENSMUSG00000026283 | <i>Ing5</i>         | 1.47 | 1.56 | 1.51 | 1.33 |
| ENSMUSG00000026289 | <i>Atg16l1</i>      | 3.66 | 3.84 | 3.71 | 3.73 |
| ENSMUSG00000026295 | <i>Spp2</i>         | 7.27 | 7.17 | 7.42 | 7.13 |
| ENSMUSG00000026304 | <i>Rab17</i>        | 4.24 | 4.39 | 4.74 | 4.39 |
| ENSMUSG00000026305 | <i>Lrrfip1</i>      | 2.65 | 2.77 | 2.87 | 2.56 |
| ENSMUSG00000026307 | <i>Scly</i>         | 5.86 | 6.27 | 5.79 | 5.79 |
| ENSMUSG00000026309 | <i>Ilkap</i>        | 4.08 | 4.37 | 4.19 | 3.83 |
| ENSMUSG00000026315 | <i>Serpinb8</i>     | 2.53 | 2.1  | 2.89 | 2.73 |
| ENSMUSG00000026317 | <i>Cln8</i>         | 4.2  | 4.3  | 4.41 | 4.45 |
| ENSMUSG00000026319 | <i>2310035C23Ri</i> | 2.11 | 1.33 | 1.74 | 1.51 |
| ENSMUSG00000026333 | <i>Zh2c2</i>        | 2.67 | 1.55 | 1.54 | 1.82 |
| ENSMUSG00000026335 | <i>Pam</i>          | 3.6  | 3.31 | 3.13 | 2.95 |
| ENSMUSG00000026339 | <i>Ccdc93</i>       | 1.5  | 1.66 | 1.73 | 1.55 |
| ENSMUSG00000026341 | <i>Actr3</i>        | 3.9  | 2.76 | 3.38 | 2.82 |
| ENSMUSG00000026342 | <i>Slc35f5</i>      | 4.64 | 4.29 | 4.52 | 4.1  |
| ENSMUSG00000026343 | <i>NA</i>           | 1.26 | 1.29 | 1.49 | 1.12 |
| ENSMUSG00000026344 | <i>Lypd1</i>        | 0.4  | 0.72 | 1.02 | 0.02 |
| ENSMUSG00000026348 | <i>Acmsd</i>        | 5.02 | 3.46 | 5.24 | 3.87 |
| ENSMUSG00000026349 | <i>Ccnt2</i>        | 3.04 | 1.9  | 2.19 | 1.84 |
| ENSMUSG00000026353 | <i>Ubx2</i>         | 5.46 | 5.29 | 4.88 | 4.65 |
| ENSMUSG00000026356 | <i>Dars</i>         | 5.38 | 4.97 | 5.38 | 4.81 |
| ENSMUSG00000026360 | <i>Rgs2</i>         | 2.8  | 1.29 | 1.34 | 1.2  |
| ENSMUSG00000026361 | <i>Cdc73</i>        | 3.54 | 2.6  | 2.87 | 2.78 |
| ENSMUSG00000026365 | <i>Cfh</i>          | 7.42 | 6.57 | 6.78 | 6.53 |
| ENSMUSG00000026368 | <i>F13b</i>         | 7.23 | 6.49 | 6.8  | 6.52 |

|                    |                 |      |      |      |       |
|--------------------|-----------------|------|------|------|-------|
| ENSMUSG00000026374 | <i>Tsn</i>      | 4.08 | 3.74 | 4.2  | 3.7   |
| ENSMUSG00000026377 | <i>Mki67ip</i>  | 4.72 | 4.52 | 4.42 | 4.5   |
| ENSMUSG00000026380 | <i>Crtr-1</i>   | 1.26 | 0.76 | 0.8  | 0.13  |
| ENSMUSG00000026383 | <i>Epb4.115</i> | 3.78 | 3.17 | 3.34 | 3.21  |
| ENSMUSG00000026385 | <i>Dbi</i>      | 9.02 | 8.77 | 9.09 | 9.12  |
| ENSMUSG00000026389 | <i>Steap3</i>   | 3.12 | 3.56 | 3.19 | 2.77  |
| ENSMUSG00000026393 | <i>Nek7</i>     | 5.02 | 4.53 | 4.73 | 4.29  |
| ENSMUSG00000026395 | <i>Ptprc</i>    | 1.12 | 0.58 | 1.67 | -0.08 |
| ENSMUSG00000026398 | <i>Nr5a2</i>    | 4.43 | 4.45 | 4.23 | 4.25  |
| ENSMUSG00000026399 | <i>Cd55</i>     | 2.91 | 2.41 | 1.98 | 1.75  |
| ENSMUSG00000026404 | <i>Ddx59</i>    | 1.48 | 1.35 | 2.13 | 1.93  |
| ENSMUSG00000026405 | <i>C4bp</i>     | 7.63 | 7.11 | 7.37 | 7.21  |
| ENSMUSG00000026409 | <i>Pfkfb2</i>   | 2.16 | 2.22 | 1.84 | 1.88  |
| ENSMUSG00000026411 | <i>Tmem9</i>    | 3.71 | 3.66 | 3.66 | 3.34  |
| ENSMUSG00000026417 | <i>Pigr</i>     | 9.44 | 9.57 | 9.54 | 9.33  |
| ENSMUSG00000026421 | <i>Csrp1</i>    | 3.4  | 3.64 | 3.46 | 3.07  |
| ENSMUSG00000026425 | <i>Srgap2</i>   | 1.61 | 1.24 | 1.5  | 1.36  |
| ENSMUSG00000026426 | <i>Arl8a</i>    | 3.13 | 3.32 | 3.42 | 3.02  |
| ENSMUSG00000026427 | <i>Lgtn</i>     | 4.28 | 4.7  | 4.36 | 4.3   |
| ENSMUSG00000026430 | <i>Rassf5</i>   | 2.46 | 2.62 | 2.99 | 2.56  |
| ENSMUSG00000026433 | <i>Rab711</i>   | 3.1  | 3.21 | 3.55 | 3.44  |
| ENSMUSG00000026434 | <i>Nucks1</i>   | 5.49 | 4.34 | 5.15 | 4.64  |
| ENSMUSG00000026435 | <i>Slc45a3</i>  | 5.25 | 5.52 | 4.98 | 4.69  |
| ENSMUSG00000026436 | <i>Elk4</i>     | 3.09 | 2.42 | 3.46 | 2.72  |
| ENSMUSG00000026437 | <i>Pctk3</i>    | 4.42 | 4.4  | 4.97 | 4.7   |
| ENSMUSG00000026439 | <i>Rbbp5</i>    | 3.12 | 3.04 | 3.2  | 2.83  |
| ENSMUSG00000026455 | <i>Klhl12</i>   | 2.45 | 2.09 | 2.41 | 1.94  |
| ENSMUSG00000026456 | <i>Cyb5r1</i>   | 1.47 | 1.72 | 2.08 | 1.84  |
| ENSMUSG00000026457 | <i>Adipor1</i>  | 5.83 | 6.05 | 5.88 | 5.63  |
| ENSMUSG00000026464 | <i>Zc3h11a</i>  | 4.36 | 4.2  | 4.05 | 3.98  |
| ENSMUSG00000026466 | <i>Tor1aip1</i> | 4.54 | 4.66 | 4.54 | 4.44  |

|                    |                     |      |      |      |       |
|--------------------|---------------------|------|------|------|-------|
| ENSMUSG00000026469 | <i>Xpr1</i>         | 3.49 | 2.66 | 3.26 | 3     |
| ENSMUSG00000026470 | <i>Stx6</i>         | 2.07 | 2.66 | 2.29 | 2.16  |
| ENSMUSG00000026471 | <i>Mr1</i>          | 2.47 | 1.77 | 2.26 | 1.72  |
| ENSMUSG00000026473 | <i>Glul</i>         | 8.21 | 8.26 | 8.4  | 8.08  |
| ENSMUSG00000026475 | <i>Rgs16</i>        | 5.93 | 4.45 | 6.48 | 6.41  |
| ENSMUSG00000026478 | <i>Lamc1</i>        | 1.73 | 1.77 | 1.78 | 1.61  |
| ENSMUSG00000026482 | <i>Rgl1</i>         | 2.21 | 2.3  | 2.07 | 1.82  |
| ENSMUSG00000026484 | <i>Rnf2</i>         | 3.67 | 2.42 | 3.17 | 2.83  |
| ENSMUSG00000026489 | <i>Cabc1</i>        | 7.44 | 8.14 | 7.3  | 6.97  |
| ENSMUSG00000026490 | <i>NA</i>           | 2.45 | 2.28 | 2.31 | 1.83  |
| ENSMUSG00000026491 | <i>Ahctf1</i>       | 4.07 | 3.86 | 3.54 | 3.1   |
| ENSMUSG00000026492 | <i>Tfb2m</i>        | 1.59 | 1.17 | 1.51 | 1.22  |
| ENSMUSG00000026495 | <i>Efcab2</i>       | 1.56 | 0.36 | 1.73 | -0.11 |
| ENSMUSG00000026496 | <i>Parp1</i>        | 3.74 | 4.27 | 3.78 | 3.73  |
| ENSMUSG00000026499 | <i>Acbd3</i>        | 3.95 | 3.54 | 3.41 | 3.14  |
| ENSMUSG00000026500 | <i>2310005N03Ri</i> | 5.39 | 4.63 | 5.41 | 4.21  |
| ENSMUSG00000026502 | <i>5830417C01Ri</i> | 3.23 | 2.64 | 2.82 | 2.28  |
| ENSMUSG00000026509 | <i>Capn2</i>        | 4.55 | 4.28 | 4.2  | 3.9   |
| ENSMUSG00000026510 | <i>Trp53bp2</i>     | 2.69 | 2.76 | 2.96 | 2.72  |
| ENSMUSG00000026511 | <i>Srp9</i>         | 4.63 | 3.84 | 4.31 | 3.73  |
| ENSMUSG00000026516 | <i>Nvl</i>          | 2.54 | 2.57 | 2.57 | 2.45  |
| ENSMUSG00000026519 | <i>Tmem63a</i>      | 3.38 | 3.25 | 3.26 | 2.74  |
| ENSMUSG00000026520 | <i>Pycr2</i>        | 1.74 | 2.98 | 2.24 | 2.16  |
| ENSMUSG00000026526 | <i>Fhl1</i>         | 7.27 | 7.17 | 7.52 | 7.13  |
| ENSMUSG00000026535 | <i>Ifi202b</i>      | 1.81 | 1.05 | 0.56 | 0.7   |
| ENSMUSG00000026542 | <i>Apcs</i>         | 8.92 | 8.98 | 8.64 | 8.25  |
| ENSMUSG00000026544 | <i>Dusp23</i>       | 2.23 | 3.18 | 2.59 | 1.93  |
| ENSMUSG00000026547 | <i>Tagln2</i>       | 3.47 | 3.89 | 3.75 | 3.72  |
| ENSMUSG00000026553 | <i>Copa</i>         | 6.07 | 6.15 | 5.96 | 5.84  |
| ENSMUSG00000026554 | <i>Wdr42a</i>       | 5.22 | 5.56 | 5.28 | 4.98  |
| ENSMUSG00000026558 | <i>Uck2</i>         | 2.68 | 2.83 | 2.89 | 2.62  |

|                    |                     |       |      |      |       |
|--------------------|---------------------|-------|------|------|-------|
| ENSMUSG00000026563 | <i>Tada1l</i>       | 3.13  | 3.02 | 3.11 | 2.71  |
| ENSMUSG00000026566 | <i>Mpz1l</i>        | 1.45  | 1.43 | 0.88 | 0.94  |
| ENSMUSG00000026568 | <i>AK008044</i>     | 7.92  | 7.81 | 7.68 | 7.5   |
| ENSMUSG00000026571 | <i>NA</i>           | 4.49  | 4.56 | 4.04 | 4.04  |
| ENSMUSG00000026574 | <i>Dpt</i>          | 1.38  | 1.22 | 1.3  | 1.72  |
| ENSMUSG00000026575 | <i>Nme7</i>         | 2.2   | 1.28 | 2.09 | 1.88  |
| ENSMUSG00000026576 | <i>Atp1b1</i>       | 5.99  | 4.95 | 5.82 | 5.48  |
| ENSMUSG00000026577 | <i>Blzf1</i>        | 2.09  | 1.59 | 1.93 | 1.79  |
| ENSMUSG00000026578 | <i>4930455F23Ri</i> | 1.95  | 1.66 | 2.25 | 1.21  |
| ENSMUSG00000026579 | <i>F5</i>           | 7.14  | 6.58 | 6.9  | 6.77  |
| ENSMUSG00000026580 | <i>Selp</i>         | 0.79  | 0.85 | 1.27 | 0.87  |
| ENSMUSG00000026581 | <i>Sell</i>         | -0.32 | -0.9 | 1.21 | -1.69 |
| ENSMUSG00000026584 | <i>Scyl3</i>        | 3.48  | 3.16 | 3.18 | 2.84  |
| ENSMUSG00000026585 | <i>Kifap3</i>       | 2.06  | 1.6  | 2.01 | 1.53  |
| ENSMUSG00000026589 | <i>Sec16b</i>       | 5.34  | 5.22 | 4.94 | 4.5   |
| ENSMUSG00000026594 | <i>Ralgps2</i>      | 3.56  | 3.07 | 3.56 | 3.19  |
| ENSMUSG00000026603 | <i>Smyd2</i>        | 4.05  | 3.93 | 3.48 | 3.37  |
| ENSMUSG00000026608 | <i>Kctd3</i>        | 1.57  | 1.98 | 1.81 | 1.7   |
| ENSMUSG00000026614 | <i>Slc30a10</i>     | 4.75  | 4.54 | 3.96 | 3.68  |
| ENSMUSG00000026615 | <i>Eprs</i>         | 5.22  | 4.99 | 5.08 | 4.66  |
| ENSMUSG00000026617 | <i>Bpnt1</i>        | 5.5   | 5.28 | 5.52 | 5.28  |
| ENSMUSG00000026618 | <i>Iars2</i>        | 4.47  | 4.56 | 4.45 | 4.17  |
| ENSMUSG00000026621 | <i>Mosc1</i>        | 7.96  | 8.14 | 8.24 | 7.89  |
| ENSMUSG00000026623 | <i>Lpgat1</i>       | 5.5   | 4.97 | 5.23 | 4.76  |
| ENSMUSG00000026626 | <i>Ppp2r5a</i>      | 5.67  | 5.37 | 5.59 | 5.12  |
| ENSMUSG00000026632 | <i>NA</i>           | 1.79  | 1.84 | 1.75 | 1.2   |
| ENSMUSG00000026634 | <i>Angel2</i>       | 2.69  | 2.62 | 3.07 | 2.7   |
| ENSMUSG00000026638 | <i>Irf6</i>         | 4.18  | 4.31 | 3.65 | 3.28  |
| ENSMUSG00000026640 | <i>Plxna2</i>       | 1.84  | 2    | 2.41 | 2.19  |
| ENSMUSG00000026641 | <i>Usf1</i>         | 2.46  | 2.81 | 2.56 | 2.86  |
| ENSMUSG00000026643 | <i>Nmt2</i>         | 3.05  | 2.6  | 3.06 | 2.34  |

|                    |                     |       |       |       |       |
|--------------------|---------------------|-------|-------|-------|-------|
| ENSMUSG00000026655 | <i>3110001A13Ri</i> | 5.66  | 4.49  | 5.16  | 4.78  |
| ENSMUSG00000026656 | <i>Fcgr2b</i>       | 5.31  | 5.03  | 4.92  | 5.13  |
| ENSMUSG00000026659 | <i>Dusp12</i>       | 2.66  | 2.56  | 2.57  | 2.42  |
| ENSMUSG00000026662 | <i>Sephs1</i>       | 3.49  | 3.14  | 3.05  | 3.06  |
| ENSMUSG00000026663 | <i>Atf6</i>         | 4.15  | 3.89  | 3.95  | 3.67  |
| ENSMUSG00000026664 | <i>Phyh</i>         | 10.06 | 9.68  | 10.06 | 9.69  |
| ENSMUSG00000026667 | <i>Uhmkl</i>        | 3.56  | 2.88  | 3.1   | 2.9   |
| ENSMUSG00000026669 | <i>Mcm10</i>        | 1.86  | 2.55  | 2.66  | 2.93  |
| ENSMUSG00000026670 | <i>Uap1</i>         | 5.11  | 4.8   | 4.77  | 4.58  |
| ENSMUSG00000026672 | <i>Optn</i>         | 5.49  | 5.49  | 5.59  | 5.3   |
| ENSMUSG00000026675 | <i>Hsd17b7</i>      | 3.56  | 3.53  | 3.31  | 3.33  |
| ENSMUSG00000026678 | <i>Rgs5</i>         | 5.24  | 4.19  | 4.82  | 4.26  |
| ENSMUSG00000026687 | <i>Aldh9a1</i>      | 7.96  | 7.6   | 7.6   | 7.04  |
| ENSMUSG00000026688 | <i>Mgst3</i>        | 5.35  | 5.63  | 5.63  | 6.03  |
| ENSMUSG00000026691 | <i>Fmo3</i>         | 8.24  | 8.46  | 8.07  | 7.53  |
| ENSMUSG00000026692 | <i>Fmo4</i>         | 3.06  | 1.66  | 3     | 2.52  |
| ENSMUSG00000026694 | <i>5630401D24Ri</i> | 1.83  | 2.73  | 2.15  | 2.13  |
| ENSMUSG00000026696 | <i>Vamp4</i>        | 2.84  | 1.82  | 2.09  | 1.87  |
| ENSMUSG00000026698 | <i>Pigc</i>         | 2.64  | 2.24  | 2.62  | 2.48  |
| ENSMUSG00000026701 | <i>Prdx6</i>        | 8.86  | 8.46  | 8.57  | 8.24  |
| ENSMUSG00000026705 | <i>Klhl20</i>       | 1.96  | 1.5   | 1.85  | 1.14  |
| ENSMUSG00000026709 | <i>Dars2</i>        | 2.92  | 2.73  | 2.9   | 2.14  |
| ENSMUSG00000026712 | <i>Mrc1</i>         | 4.39  | 3.68  | 3.84  | 3.64  |
| ENSMUSG00000026715 | <i>Serpinc1</i>     | 10.34 | 10.44 | 10.45 | 10.37 |
| ENSMUSG00000026718 | <i>Stam</i>         | 3.12  | 2.27  | 2.64  | 2.19  |
| ENSMUSG00000026721 | <i>Rabgap1l</i>     | 2.57  | 1.42  | 2.07  | 1.39  |
| ENSMUSG00000026723 | <i>Trdmt1</i>       | 1.05  | -0.11 | 0.63  | 0.23  |
| ENSMUSG00000026727 | <i>Rsul</i>         | 4.69  | 4.35  | 4.53  | 4.27  |
| ENSMUSG00000026728 | <i>Vim</i>          | 3.68  | 3.14  | 3.51  | 3.39  |
| ENSMUSG00000026729 | <i>NA</i>           | 1.76  | 2     | 1.98  | 1.47  |
| ENSMUSG00000026730 | <i>Pter</i>         | 6.38  | 5.94  | 5.67  | 5.57  |

|                    |                     |      |       |      |       |
|--------------------|---------------------|------|-------|------|-------|
| ENSMUSG00000026737 | <i>Pip4k2a</i>      | 1.94 | 1.49  | 1.71 | 0.95  |
| ENSMUSG00000026739 | <i>Bmi1</i>         | 3.2  | 2.41  | 2.75 | 2.27  |
| ENSMUSG00000026740 | <i>Dnajc1</i>       | 4.34 | 3.5   | 4.05 | 3.69  |
| ENSMUSG00000026743 | <i>Mllt10</i>       | 3.3  | 3.13  | 3.25 | 2.91  |
| ENSMUSG00000026749 | <i>Nek6</i>         | 4.19 | 4.6   | 4.33 | 4.21  |
| ENSMUSG00000026750 | <i>Psmb7</i>        | 7.2  | 6.18  | 6.56 | 6.22  |
| ENSMUSG00000026753 | <i>Ppp6c</i>        | 5.19 | 4.45  | 4.97 | 4.7   |
| ENSMUSG00000026754 | <i>Golgal</i>       | 2.59 | 2.32  | 2.26 | 1.9   |
| ENSMUSG00000026755 | <i>Arpc5l</i>       | 4.72 | 4.28  | 4.7  | 4.36  |
| ENSMUSG00000026761 | <i>Orc4l</i>        | 3.04 | 1.58  | 2.59 | 1.85  |
| ENSMUSG00000026766 | <i>2010311D03Ri</i> | 5.71 | 5.46  | 5.64 | 5.22  |
| ENSMUSG00000026767 | <i>2310047O13Ri</i> | 4.07 | 2.86  | 3.92 | 3.58  |
| ENSMUSG00000026771 | <i>4921517N04Ri</i> | 1.86 | 1.15  | 1.02 | 0.66  |
| ENSMUSG00000026773 | <i>Pfkfb3</i>       | 1.69 | 1.53  | 2.01 | 3.23  |
| ENSMUSG00000026775 | <i>Yme1ll</i>       | 5.52 | 4.39  | 5.12 | 4.47  |
| ENSMUSG00000026781 | <i>Acbd5</i>        | 5.97 | 4.96  | 5.62 | 5.39  |
| ENSMUSG00000026784 | <i>Pdss1</i>        | 1.51 | 1.04  | 1.4  | 0.61  |
| ENSMUSG00000026786 | <i>Apbb1ip</i>      | 0.66 | -0.14 | 1.11 | -0.05 |
| ENSMUSG00000026788 | <i>Zbtb43</i>       | 3.36 | 3.12  | 2.89 | 2.59  |
| ENSMUSG00000026790 | <i>Odf2</i>         | 1.49 | 1.72  | 2    | 1.32  |
| ENSMUSG00000026791 | <i>Slc2a8</i>       | 3.36 | 4.03  | 3.29 | 3.58  |
| ENSMUSG00000026792 | <i>Lrsam1</i>       | 1.95 | 2.18  | 2.52 | 2.03  |
| ENSMUSG00000026796 | <i>9130404D14Ri</i> | 1.51 | 2.3   | 2.06 | 1.76  |
| ENSMUSG00000026798 | <i>Coq4</i>         | 3.69 | 4     | 3.55 | 3.3   |
| ENSMUSG00000026799 | <i>Med27</i>        | 2.53 | 2.71  | 2.87 | 2.76  |
| ENSMUSG00000026803 | <i>Tf1l</i>         | 2.08 | 1.92  | 1.95 | 1.88  |
| ENSMUSG00000026806 | <i>Ddx31</i>        | 1.28 | 1.87  | 1.3  | 1.33  |
| ENSMUSG00000026810 | <i>Dpm2</i>         | 4.09 | 4.49  | 4.18 | 4.35  |
| ENSMUSG00000026811 | <i>St6galnac6</i>   | 4.56 | 4.35  | 4.28 | 3.97  |
| ENSMUSG00000026812 | <i>Tsc1</i>         | 3    | 2.55  | 2.89 | 2.45  |
| ENSMUSG00000026814 | <i>Eng</i>          | 5.28 | 6.14  | 5.57 | 5.58  |

|                    |                     |      |      |      |      |
|--------------------|---------------------|------|------|------|------|
| ENSMUSG00000026816 | <i>Gtf3c5</i>       | 2.49 | 2.84 | 2.64 | 2.39 |
| ENSMUSG00000026819 | <i>Slc25a25</i>     | 6.19 | 6.3  | 6.02 | 6.06 |
| ENSMUSG00000026820 | <i>Ptges2</i>       | 3.85 | 4.74 | 4.38 | 4.24 |
| ENSMUSG00000026822 | <i>Lcn2</i>         | 6.04 | 5.54 | 6.25 | 4.66 |
| ENSMUSG00000026827 | <i>Gpd2</i>         | 3.77 | 2.46 | 3.43 | 2.83 |
| ENSMUSG00000026836 | <i>Acvr1</i>        | 2.46 | 2.68 | 2.25 | 2.32 |
| ENSMUSG00000026839 | <i>Upp2</i>         | 7.87 | 5.95 | 7.36 | 6.74 |
| ENSMUSG00000026842 | <i>Abl1</i>         | 2.29 | 2.84 | 2.67 | 2.49 |
| ENSMUSG00000026843 | <i>Fubp3</i>        | 2.68 | 2.45 | 2.54 | 2.57 |
| ENSMUSG00000026848 | <i>Tor1b</i>        | 3.22 | 3.68 | 3.78 | 3.64 |
| ENSMUSG00000026849 | <i>Tor1a</i>        | 4.38 | 4.97 | 4.95 | 4.95 |
| ENSMUSG00000026851 | <i>BC005624</i>     | 3.3  | 3.4  | 3.46 | 3.03 |
| ENSMUSG00000026853 | <i>Crat</i>         | 4.76 | 4.87 | 4.45 | 4.07 |
| ENSMUSG00000026854 | <i>Usp20</i>        | 0.79 | 1.38 | 1.33 | 1.28 |
| ENSMUSG00000026856 | <i>Dolpp1</i>       | 3.16 | 3.59 | 3.51 | 3.02 |
| ENSMUSG00000026857 | <i>2610205E22Ri</i> | 1.66 | 2.91 | 2.69 | 2.19 |
| ENSMUSG00000026858 | <i>5730472N09Ri</i> | 4.18 | 4.35 | 4.86 | 4.28 |
| ENSMUSG00000026860 | <i>Sh3glb2</i>      | 3.38 | 4.16 | 3.67 | 3.34 |
| ENSMUSG00000026864 | <i>Hspa5</i>        | 8.11 | 8.74 | 7.19 | 7.59 |
| ENSMUSG00000026866 | <i>Kynu</i>         | 6.71 | 5.86 | 6.7  | 6.09 |
| ENSMUSG00000026867 | <i>Gapvd1</i>       | 3.59 | 3.65 | 3.63 | 3.19 |
| ENSMUSG00000026869 | <i>Psm5</i>         | 4.98 | 4.68 | 4.73 | 4.41 |
| ENSMUSG00000026870 | <i>D730039F16R</i>  | 4.69 | 4.74 | 4.56 | 4.32 |
| ENSMUSG00000026872 | <i>Zeb2</i>         | 1.61 | 0.59 | 1.28 | 0.66 |
| ENSMUSG00000026874 | <i>Hc</i>           | 7.57 | 7.46 | 7.38 | 7.37 |
| ENSMUSG00000026878 | <i>Rab14</i>        | 6.05 | 5.39 | 5.7  | 5.39 |
| ENSMUSG00000026879 | <i>Gsn</i>          | 2.55 | 3.37 | 3.31 | 3.06 |
| ENSMUSG00000026880 | <i>Stom</i>         | 5.74 | 5.13 | 5.44 | 5.26 |
| ENSMUSG00000026883 | <i>Dab2ip</i>       | 1.65 | 2.37 | 1.87 | 1.68 |
| ENSMUSG00000026887 | <i>Mrrf</i>         | 3.21 | 3.21 | 3.16 | 3.11 |
| ENSMUSG00000026888 | <i>Grb14</i>        | 5.24 | 4.82 | 5.07 | 4.7  |

|                    |                 |      |      |      |      |
|--------------------|-----------------|------|------|------|------|
| ENSMUSG00000026889 | <i>Rbm18</i>    | 3.87 | 3.11 | 3.34 | 3.28 |
| ENSMUSG00000026890 | <i>Lhx6</i>     | 1.3  | 0.82 | 1.83 | 0.15 |
| ENSMUSG00000026893 | <i>Gca</i>      | 1.01 | 0.09 | 1.43 | 0.63 |
| ENSMUSG00000026895 | <i>Ndufa8</i>   | 6.59 | 6.81 | 6.98 | 6.74 |
| ENSMUSG00000026896 | <i>Ifih1</i>    | 3.71 | 2.35 | 3.13 | 2.74 |
| ENSMUSG00000026914 | <i>Psmc14</i>   | 5.29 | 5.01 | 4.85 | 4.52 |
| ENSMUSG00000026915 | <i>Strbp</i>    | 3.91 | 3.14 | 3.62 | 2.85 |
| ENSMUSG00000026917 | <i>Wdr5</i>     | 4.25 | 4.09 | 4.2  | 4.06 |
| ENSMUSG00000026918 | <i>AK165817</i> | 3.63 | 3.75 | 3.72 | 3.58 |
| ENSMUSG00000026921 | <i>Egfl7</i>    | 3.14 | 3.85 | 3.07 | 3.35 |
| ENSMUSG00000026922 | <i>Agpat2</i>   | 7.4  | 7.92 | 7.49 | 7.19 |
| ENSMUSG00000026923 | <i>Notch1</i>   | 1.86 | 3.29 | 1.95 | 2    |
| ENSMUSG00000026924 | <i>Sec16a</i>   | 4.21 | 4.37 | 4.28 | 4.11 |
| ENSMUSG00000026925 | <i>Inpp5e</i>   | 1.75 | 1.99 | 1.83 | 1.42 |
| ENSMUSG00000026926 | <i>Pmpca</i>    | 4.92 | 4.73 | 4.78 | 4.39 |
| ENSMUSG00000026927 | <i>Sdccag3</i>  | 4.44 | 4.67 | 4.45 | 4.33 |
| ENSMUSG00000026932 | <i>Btbd14a</i>  | 3.06 | 2.99 | 2.99 | 2.77 |
| ENSMUSG00000026933 | <i>NA</i>       | 0.95 | 1.18 | 1.01 | 1.03 |
| ENSMUSG00000026938 | <i>Fcna</i>     | 4.76 | 5.25 | 4.75 | 4.61 |
| ENSMUSG00000026939 | <i>Tmem141</i>  | 3.82 | 4.22 | 4.11 | 3.96 |
| ENSMUSG00000026942 | <i>Traf2</i>    | 2.32 | 3.18 | 2.51 | 2.6  |
| ENSMUSG00000026944 | <i>Abca2</i>    | 3.8  | 4.49 | 3.92 | 3.46 |
| ENSMUSG00000026946 | <i>Nmi</i>      | 4.05 | 2.9  | 3.77 | 3.85 |
| ENSMUSG00000026958 | <i>Dpp7</i>     | 3.45 | 4.04 | 3.79 | 3.91 |
| ENSMUSG00000026960 | <i>Arl6ip6</i>  | 2.68 | 1.92 | 3.18 | 2.51 |
| ENSMUSG00000026965 | <i>Anapc2</i>   | 4.2  | 4.73 | 4.27 | 4.08 |
| ENSMUSG00000026966 | <i>Ssna1</i>    | 3.57 | 3.98 | 3.67 | 3.8  |
| ENSMUSG00000026970 | <i>Rbms1</i>    | 3.8  | 2.95 | 3.33 | 3.11 |
| ENSMUSG00000026974 | <i>Zmynd19</i>  | 1.29 | 2.24 | 1.6  | 1.5  |
| ENSMUSG00000026975 | <i>Wdr85</i>    | 1.14 | 1.69 | 1.23 | 0.84 |
| ENSMUSG00000026977 | <i>7-Mar</i>    | 3.03 | 2.54 | 2.74 | 1.86 |



|                    |                 |      |       |      |      |
|--------------------|-----------------|------|-------|------|------|
| ENSMUSG00000026981 | <i>Illrn</i>    | 2.4  | 0.48  | 2.04 | 1.31 |
| ENSMUSG00000026986 | <i>Hnmt</i>     | 4.05 | 3.13  | 4.19 | 3.09 |
| ENSMUSG00000026987 | <i>Baz2b</i>    | 1.29 | 0.63  | 1.21 | 0.93 |
| ENSMUSG00000026988 | <i>Wdsub1</i>   | 1.25 | 1.45  | 1.1  | 0.75 |
| ENSMUSG00000026991 | <i>Pkp4</i>     | 4.62 | 5.12  | 4.94 | 4.85 |
| ENSMUSG00000027001 | <i>Dusp19</i>   | 2.92 | 1.64  | 2.57 | 1.88 |
| ENSMUSG00000027002 | <i>Nckap1</i>   | 5.93 | 5.38  | 5.65 | 5.04 |
| ENSMUSG00000027006 | <i>Dnajc10</i>  | 3.33 | 2.88  | 3.14 | 2.56 |
| ENSMUSG00000027007 | <i>Ssfa2</i>    | 4.9  | 4.62  | 4.8  | 4.54 |
| ENSMUSG00000027010 | <i>Slc25a12</i> | 3.41 | 3.06  | 3.63 | 3.16 |
| ENSMUSG00000027011 | <i>Ube2e3</i>   | 4.33 | 3.5   | 4.09 | 3.56 |
| ENSMUSG00000027012 | <i>Dync1i2</i>  | 5.17 | 4.48  | 4.79 | 4.37 |
| ENSMUSG00000027016 | <i>Zfp533</i>   | 2.29 | 2.21  | 3.06 | 2.56 |
| ENSMUSG00000027018 | <i>Hat1</i>     | 2.54 | 2.14  | 2.53 | 1.8  |
| ENSMUSG00000027030 | <i>Stk39</i>    | 0.91 | -0.17 | 1.53 | 0.23 |
| ENSMUSG00000027035 | <i>Lass6</i>    | 3.19 | 2.35  | 2.67 | 2.24 |
| ENSMUSG00000027048 | <i>Abcb11</i>   | 7.93 | 7.55  | 7.7  | 7.32 |
| ENSMUSG00000027067 | <i>Ssrp1</i>    | 4.37 | 4.96  | 4.55 | 4.58 |
| ENSMUSG00000027074 | <i>Slc43a3</i>  | 4.46 | 4.57  | 4.24 | 4.05 |
| ENSMUSG00000027075 | <i>Slc43a1</i>  | 2.96 | 3.22  | 3.21 | 2.77 |
| ENSMUSG00000027076 | <i>Timm10</i>   | 3.45 | 4.53  | 4.45 | 4.26 |
| ENSMUSG00000027078 | <i>Ube2l6</i>   | 5.75 | 5.73  | 5.59 | 5.53 |
| ENSMUSG00000027079 | <i>Clp1</i>     | 3.52 | 3.43  | 3.11 | 3.16 |
| ENSMUSG00000027080 | <i>Med19</i>    | 3.93 | 3.1   | 3.31 | 3.21 |
| ENSMUSG00000027082 | <i>Tfpi</i>     | 1.13 | 0.76  | 0.27 | 0.32 |
| ENSMUSG00000027086 | <i>Fastkd1</i>  | 3.87 | 3.11  | 4.07 | 3.42 |
| ENSMUSG00000027087 | <i>Itgav</i>    | 2.03 | 2.1   | 2.1  | 2.08 |
| ENSMUSG00000027088 | <i>Phospho2</i> | 4.48 | 3.23  | 3.89 | 3.66 |
| ENSMUSG00000027091 | <i>Zc3h15</i>   | 4.45 | 3.92  | 3.93 | 3.63 |
| ENSMUSG00000027099 | <i>Mtx2</i>     | 4.23 | 3.68  | 4.21 | 3.63 |
| ENSMUSG00000027104 | <i>Atf2</i>     | 3.83 | 3.17  | 3.55 | 3.06 |

|                    |                     |       |       |       |       |
|--------------------|---------------------|-------|-------|-------|-------|
| ENSMUSG00000027108 | <i>Ola1</i>         | 4.9   | 3.94  | 4.38  | 3.88  |
| ENSMUSG00000027109 | <i>Sp3</i>          | 4.15  | 3.02  | 3.74  | 3.13  |
| ENSMUSG00000027122 | <i>2700007P21Ri</i> | 1.91  | 0.98  | 1.66  | 1.39  |
| ENSMUSG00000027130 | <i>Slc12a6</i>      | 2.02  | 1.33  | 1.99  | 1.42  |
| ENSMUSG00000027131 | <i>Tmem85</i>       | 5.47  | 5.42  | 5.66  | 5.44  |
| ENSMUSG00000027132 | <i>2410042D21Ri</i> | 1.55  | 0.31  | 1.05  | 0.59  |
| ENSMUSG00000027133 | <i>Nola3</i>        | 5.68  | 5.79  | 6.17  | 6.32  |
| ENSMUSG00000027162 | <i>Lin7c</i>        | 4.05  | 3.2   | 3.51  | 3.35  |
| ENSMUSG00000027163 | <i>Commd9</i>       | 3.34  | 3.48  | 3.5   | 3.54  |
| ENSMUSG00000027164 | <i>Traf6</i>        | 2.97  | 2.21  | 2.73  | 2.38  |
| ENSMUSG00000027165 | <i>B230118H07Ri</i> | 3.63  | 3.52  | 3.67  | 2.87  |
| ENSMUSG00000027166 | <i>Dph4</i>         | 2.82  | 2.24  | 2.74  | 2.14  |
| ENSMUSG00000027167 | <i>Elp4</i>         | 2.98  | 2.81  | 2.85  | 2.06  |
| ENSMUSG00000027170 | <i>Eif3m</i>        | 3.22  | 3.07  | 3.03  | 2.74  |
| ENSMUSG00000027173 | <i>Depdc7</i>       | 4.12  | 3.9   | 4.18  | 4.07  |
| ENSMUSG00000027175 | <i>BC057381</i>     | 0.94  | 0.23  | 1.14  | 0.31  |
| ENSMUSG00000027176 | <i>Cstf3</i>        | 2.12  | 1.45  | 1.77  | 1.46  |
| ENSMUSG00000027177 | <i>Hipk3</i>        | 3.96  | 3.87  | 3.94  | 3.78  |
| ENSMUSG00000027180 | <i>Fbxo3</i>        | 4.48  | 3.88  | 4.29  | 4     |
| ENSMUSG00000027184 | <i>Caprin1</i>      | 6.55  | 6.07  | 6.22  | 5.61  |
| ENSMUSG00000027185 | <i>Nat10</i>        | 2.08  | 2.74  | 2.49  | 2.39  |
| ENSMUSG00000027187 | <i>Cat</i>          | 10.43 | 10.37 | 10.61 | 10.29 |
| ENSMUSG00000027189 | <i>Trim44</i>       | 4.18  | 3.92  | 3.94  | 3.68  |
| ENSMUSG00000027193 | <i>Api5</i>         | 4.92  | 4.41  | 4.66  | 4.2   |
| ENSMUSG00000027194 | <i>Ttc17</i>        | 3.47  | 3.46  | 3.6   | 3.42  |
| ENSMUSG00000027195 | <i>Hsd17b12</i>     | 6.64  | 6.08  | 6.15  | 5.59  |
| ENSMUSG00000027198 | <i>Ext2</i>         | 3.79  | 4.22  | 3.84  | 3.77  |
| ENSMUSG00000027199 | <i>Gatm</i>         | 3.19  | 2.58  | 2.61  | 2.02  |
| ENSMUSG00000027200 | <i>Sema6d</i>       | 2.13  | 1.79  | 1.47  | 1.2   |
| ENSMUSG00000027203 | <i>Dut</i>          | 2.49  | 2.49  | 2.55  | 2.04  |
| ENSMUSG00000027206 | <i>Cops2</i>        | 5.17  | 4.11  | 4.67  | 4.31  |

|                    |                     |      |       |      |      |
|--------------------|---------------------|------|-------|------|------|
| ENSMUSG00000027207 | <i>Galk2</i>        | 3.63 | 3.37  | 3.49 | 3.16 |
| ENSMUSG00000027215 | <i>Cd82</i>         | 5.48 | 5.69  | 5.5  | 5.33 |
| ENSMUSG00000027222 | <i>Pex16</i>        | 5.89 | 5.93  | 5.97 | 5.81 |
| ENSMUSG00000027227 | <i>Sord</i>         | 7.97 | 8.63  | 8.11 | 8.51 |
| ENSMUSG00000027243 | <i>D230010M03R</i>  | 3.03 | 2.83  | 2.87 | 2.52 |
| ENSMUSG00000027244 | <i>D2Ertd391e</i>   | 4.6  | 4.91  | 4.55 | 4.36 |
| ENSMUSG00000027245 | <i>2310003F16Ri</i> | 3.42 | 3.37  | 3.5  | 3.82 |
| ENSMUSG00000027246 | <i>Ell3</i>         | 0.61 | -0.3  | 1.76 | 0.45 |
| ENSMUSG00000027247 | <i>Arhgap1</i>      | 2.16 | 2.49  | 2.16 | 1.88 |
| ENSMUSG00000027248 | <i>Pdia3</i>        | 8.62 | 8.16  | 7.9  | 7.7  |
| ENSMUSG00000027249 | <i>F2</i>           | 9.67 | 10.23 | 9.88 | 9.89 |
| ENSMUSG00000027253 | <i>Lrp4</i>         | 1.6  | 2.06  | 1.78 | 2.09 |
| ENSMUSG00000027255 | <i>Zfp289</i>       | 4.93 | 5.42  | 5.05 | 4.97 |
| ENSMUSG00000027257 | <i>Pacsin3</i>      | 4.34 | 4.92  | 4.41 | 4.36 |
| ENSMUSG00000027259 | <i>Adal</i>         | 3.75 | 2.64  | 3.41 | 2.68 |
| ENSMUSG00000027261 | <i>Hao1</i>         | 7.37 | 6.61  | 7.31 | 6.88 |
| ENSMUSG00000027263 | <i>Tubgcp4</i>      | 3.6  | 3.46  | 3.28 | 3.28 |
| ENSMUSG00000027272 | <i>Ubr1</i>         | 2.35 | 1.6   | 2.14 | 1.4  |
| ENSMUSG00000027274 | <i>Mkks</i>         | 3.8  | 3.76  | 3.96 | 3.55 |
| ENSMUSG00000027282 | <i>Mtch2</i>        | 5.79 | 5.35  | 5.47 | 5.05 |
| ENSMUSG00000027285 | <i>Cep27</i>        | 2.75 | 2.01  | 2.33 | 1.89 |
| ENSMUSG00000027286 | <i>Lrrc57</i>       | 2.83 | 2.28  | 2.8  | 2.52 |
| ENSMUSG00000027287 | <i>Snap23</i>       | 4.81 | 3.84  | 4.3  | 3.67 |
| ENSMUSG00000027288 | <i>Zfp106</i>       | 4.31 | 3.94  | 4.25 | 3.63 |
| ENSMUSG00000027291 | <i>Vps39</i>        | 2.54 | 3     | 3.04 | 2.81 |
| ENSMUSG00000027293 | <i>Ehd4</i>         | 1.31 | 1.77  | 1.36 | 1.01 |
| ENSMUSG00000027300 | <i>Ubox5</i>        | 1.93 | 2.37  | 1.87 | 1.29 |
| ENSMUSG00000027303 | <i>Ptptra</i>       | 4.03 | 3.79  | 3.77 | 3.36 |
| ENSMUSG00000027304 | <i>NA</i>           | 4.26 | 4.06  | 3.95 | 3.72 |
| ENSMUSG00000027305 | <i>Ndufaf1</i>      | 5.1  | 4.61  | 4.85 | 4.33 |
| ENSMUSG00000027309 | <i>4930402H24Rt</i> | 1.88 | 2.14  | 2    | 2.06 |

|                    |                     |       |        |      |        |
|--------------------|---------------------|-------|--------|------|--------|
| ENSMUSG00000027312 | <i>Atrn</i>         | 3.66  | 3.42   | 3.67 | 3.17   |
| ENSMUSG00000027313 | <i>Chac1</i>        | 2.05  | 1.95   | 1.32 | 2.14   |
| ENSMUSG00000027324 | <i>Rpusd2</i>       | 1.45  | 1.16   | 0.8  | 0.84   |
| ENSMUSG00000027327 | <i>1700037H04Ri</i> | 2.14  | 2.92   | 2.15 | 2.41   |
| ENSMUSG00000027332 | <i>Ivd</i>          | 7.08  | 7.34   | 6.95 | 6.94   |
| ENSMUSG00000027340 | <i>svct2</i>        | 2.34  | 1.94   | 2.38 | 1.91   |
| ENSMUSG00000027341 | <i>5730494N06Ri</i> | 2.39  | 1.2    | 2.13 | 1.38   |
| ENSMUSG00000027342 | <i>Pcna</i>         | 0.99  | 1.95   | 1.1  | 1.16   |
| ENSMUSG00000027346 | <i>Prei4</i>        | 5.02  | 3.01   | 4.72 | 3.66   |
| ENSMUSG00000027349 | <i>2610510H03Ri</i> | 3.13  | 2.64   | 3.03 | 2.98   |
| ENSMUSG00000027351 | <i>Spred1</i>       | 2.92  | 1.74   | 1.98 | 1.77   |
| ENSMUSG00000027357 | <i>Crls1</i>        | 5.84  | 4.82   | 5.06 | 4.39   |
| ENSMUSG00000027358 | <i>Bmp2</i>         | 3.14  | 3.57   | 3.1  | 3.02   |
| ENSMUSG00000027359 | <i>Slc27a2</i>      | 9.13  | 8.69   | 9.02 | 9.01   |
| ENSMUSG00000027360 | <i>Hdc</i>          | 1.21  | 1.27   | 0.73 | 0.91   |
| ENSMUSG00000027363 | <i>mUBPY</i>        | 4.6   | 4.1    | 4.47 | 4.12   |
| ENSMUSG00000027365 | <i>Trpm7</i>        | 3.57  | 2.45   | 3.4  | 2.7    |
| ENSMUSG00000027366 | <i>2010106G01Ri</i> | 5.59  | 5.15   | 5.18 | 4.48   |
| ENSMUSG00000027367 | <i>Stard7</i>       | 5.41  | 5.52   | 5.56 | 5.12   |
| ENSMUSG00000027371 | <i>Fahd2a</i>       | 3.5   | 3.94   | 3.56 | 3.51   |
| ENSMUSG00000027374 | <i>MRPS5</i>        | 3.49  | 3.52   | 4.03 | 3.52   |
| ENSMUSG00000027376 | <i>Prom2</i>        | 1.71  | #NAME? | 1.84 | #NAME? |
| ENSMUSG00000027378 | <i>Nphp1</i>        | 1.82  | 2.04   | 1.51 | 1.02   |
| ENSMUSG00000027381 | <i>Bcl2l1l</i>      | -0.01 | 0.62   | 1.32 | 0.89   |
| ENSMUSG00000027384 | <i>2310003L22Ri</i> | 2.47  | 1.49   | 2.3  | 1.8    |
| ENSMUSG00000027387 | <i>Zc3h8</i>        | 0.58  | 0.91   | 1.31 | 0.58   |
| ENSMUSG00000027394 | <i>Ttl</i>          | 1.45  | 1.45   | 1.41 | 1.04   |
| ENSMUSG00000027395 | <i>Rpol-2</i>       | 2.39  | 3.12   | 2.5  | 2.34   |
| ENSMUSG00000027397 | <i>Slc20a1</i>      | 3.05  | 3.32   | 3.71 | 3.83   |
| ENSMUSG00000027404 | <i>Snrpb</i>        | 4.97  | 5.79   | 5.4  | 5.32   |
| ENSMUSG00000027405 | <i>Nol5a</i>        | 3.02  | 3.75   | 2.9  | 2.96   |

|                    |                      |      |      |       |      |
|--------------------|----------------------|------|------|-------|------|
| ENSMUSG00000027406 | <i>Idh3b</i>         | 7.29 | 7.42 | 7.43  | 7    |
| ENSMUSG00000027411 | <i>Vps16</i>         | 2.82 | 3.27 | 2.79  | 2.71 |
| ENSMUSG00000027412 | <i>Lpin3</i>         | 0.6  | 1.09 | 1.11  | 0.58 |
| ENSMUSG00000027422 | <i>Rrbpl</i>         | 6.07 | 6.33 | 5.68  | 5.95 |
| ENSMUSG00000027423 | <i>Snx5</i>          | 4.9  | 4.24 | 4.72  | 4.2  |
| ENSMUSG00000027424 | <i>8430406107Rik</i> | 1.94 | 2.24 | 2.05  | 1.72 |
| ENSMUSG00000027425 | <i>Csrp2bp</i>       | 3.22 | 3.63 | 3.3   | 3.23 |
| ENSMUSG00000027427 | <i>Polr3f</i>        | 2.27 | 1.61 | 1.88  | 1.53 |
| ENSMUSG00000027428 | <i>Rbbp9</i>         | 3.99 | 3.69 | 4.01  | 3.41 |
| ENSMUSG00000027429 | <i>Sec23b</i>        | 4.06 | 4.72 | 4.07  | 4.11 |
| ENSMUSG00000027430 | <i>Dtdl</i>          | 3.53 | 3.31 | 3.34  | 3.11 |
| ENSMUSG00000027433 | <i>Xrn2</i>          | 3.9  | 3.61 | 3.87  | 3.41 |
| ENSMUSG00000027435 | <i>Cd93</i>          | 1.83 | 1.15 | 1.13  | 1.13 |
| ENSMUSG00000027439 | <i>Gzfl</i>          | 4.92 | 4.47 | 4.45  | 3.97 |
| ENSMUSG00000027447 | <i>Cst3</i>          | 7.04 | 7.21 | 7.28  | 7.1  |
| ENSMUSG00000027454 | <i>NA</i>            | 1.56 | 1.62 | 1.44  | 0.97 |
| ENSMUSG00000027455 | <i>Nsf11c</i>        | 3.35 | 3.88 | 3.36  | 3.14 |
| ENSMUSG00000027465 | <i>Tbc1d20</i>       | 4.53 | 4.65 | 4.65  | 4.4  |
| ENSMUSG00000027466 | <i>Rbck1</i>         | 4.29 | 5.02 | 4.41  | 4.37 |
| ENSMUSG00000027472 | <i>Pdrgl</i>         | 3.8  | 4.3  | 4.42  | 4.07 |
| ENSMUSG00000027475 | <i>Kif3b</i>         | 2.1  | 2    | 2.2   | 1.89 |
| ENSMUSG00000027479 | <i>Maprel</i>        | 3.27 | 3.19 | 2.9   | 2.74 |
| ENSMUSG00000027487 | <i>Cdk5rap1</i>      | 2.21 | 2.33 | 2.18  | 1.61 |
| ENSMUSG00000027488 | <i>Sntal</i>         | 3.24 | 4.11 | 3.77  | 3.55 |
| ENSMUSG00000027495 | <i>2010011120Rik</i> | 6.03 | 6.07 | 5.88  | 5.96 |
| ENSMUSG00000027498 | <i>Cstfl</i>         | 3.53 | 3.39 | 3.47  | 3.22 |
| ENSMUSG00000027502 | <i>2410001C21Rik</i> | 4.54 | 4.94 | 4.87  | 4.75 |
| ENSMUSG00000027506 | <i>Tpd52</i>         | 1.38 | 0.92 | 1.34  | 0.68 |
| ENSMUSG00000027509 | <i>Rael</i>          | 3.1  | 3.33 | 3.12  | 3.32 |
| ENSMUSG00000027510 | <i>Rbm38</i>         | 0.31 | 2.01 | 2.5   | 2.25 |
| ENSMUSG00000027513 | <i>Pckl</i>          | 9.77 | 9.66 | 10.26 | 9.92 |

|                    |                     |       |      |      |      |
|--------------------|---------------------|-------|------|------|------|
| ENSMUSG00000027514 | <i>Zbpl</i>         | 1.94  | 1.63 | 0.92 | 0.9  |
| ENSMUSG00000027519 | <i>Rab22a</i>       | 4.25  | 3.85 | 4.03 | 3.78 |
| ENSMUSG00000027522 | <i>Stx16</i>        | 3.04  | 2.76 | 2.79 | 2.55 |
| ENSMUSG00000027523 | <i>Gnas</i>         | 5.91  | 6.08 | 5.71 | 5.57 |
| ENSMUSG00000027531 | <i>Impal</i>        | 4.94  | 4.67 | 4.77 | 4.28 |
| ENSMUSG00000027534 | <i>Snx16</i>        | 1.97  | 0.76 | 1.95 | 1.74 |
| ENSMUSG00000027540 | <i>Ptpn1</i>        | 3.24  | 3.51 | 3.18 | 3.22 |
| ENSMUSG00000027546 | <i>Atp9a</i>        | 4.68  | 5.33 | 4.56 | 4.66 |
| ENSMUSG00000027551 | <i>Zfp64</i>        | 1.44  | 2.16 | 1.58 | 1.42 |
| ENSMUSG00000027552 | <i>E2f5</i>         | 3.09  | 2.11 | 2.54 | 2.48 |
| ENSMUSG00000027556 | <i>Car1</i>         | 2.8   | 1.77 | 2.67 | 2    |
| ENSMUSG00000027559 | <i>Car3</i>         | 10.41 | 9.5  | 9.65 | 9.31 |
| ENSMUSG00000027562 | <i>Car2</i>         | 3.68  | 2.93 | 3.91 | 2.57 |
| ENSMUSG00000027566 | <i>Psm7</i>         | 6.94  | 6.52 | 6.42 | 6.26 |
| ENSMUSG00000027569 | <i>1600027N09Ri</i> | 1.99  | 1.65 | 1.47 | 1.17 |
| ENSMUSG00000027573 | <i>2310003C23Ri</i> | 4.04  | 3.82 | 3.95 | 3.67 |
| ENSMUSG00000027575 | <i>Arfgap1</i>      | 2.95  | 3.6  | 3.04 | 2.77 |
| ENSMUSG00000027580 | <i>BC006779</i>     | 3.67  | 3.91 | 3.41 | 3.36 |
| ENSMUSG00000027582 | <i>Zgpat</i>        | 2.53  | 2.71 | 2.47 | 2.21 |
| ENSMUSG00000027589 | <i>Pcmd2</i>        | 4.44  | 3.31 | 4.3  | 3.8  |
| ENSMUSG00000027593 | <i>Raly</i>         | 5.06  | 5.75 | 5.55 | 5.47 |
| ENSMUSG00000027597 | <i>Ahcy</i>         | 3.81  | 3.38 | 3.77 | 3.01 |
| ENSMUSG00000027598 | <i>Itch</i>         | 5.28  | 4.4  | 4.83 | 4.28 |
| ENSMUSG00000027599 | <i>Armcl</i>        | 4.69  | 4.02 | 4.28 | 3.95 |
| ENSMUSG00000027601 | <i>Mtfr1</i>        | 5.41  | 5.08 | 5.43 | 4.98 |
| ENSMUSG00000027602 | <i>Map1lc3a</i>     | 5.75  | 6.19 | 5.78 | 5.97 |
| ENSMUSG00000027605 | <i>Acss2</i>        | 6.27  | 5.98 | 5.57 | 4.98 |
| ENSMUSG00000027610 | <i>Gss</i>          | 5.1   | 5.49 | 5.4  | 5.39 |
| ENSMUSG00000027613 | <i>Eif6</i>         | 4.53  | 5.1  | 4.88 | 4.94 |
| ENSMUSG00000027615 | <i>Hps3</i>         | 1.82  | 1.02 | 1.59 | 0.72 |
| ENSMUSG00000027618 | <i>Nfs1</i>         | 5.03  | 5.27 | 4.92 | 4.62 |

|                    |                     |      |      |      |      |
|--------------------|---------------------|------|------|------|------|
| ENSMUSG00000027620 | <i>Rbm39</i>        | 5.59 | 4.92 | 5.44 | 5    |
| ENSMUSG00000027628 | <i>0610011L14Ri</i> | 3.82 | 4.21 | 3.91 | 3.86 |
| ENSMUSG00000027630 | <i>Tbl1xr1</i>      | 3.25 | 2.67 | 2.67 | 2.14 |
| ENSMUSG00000027634 | <i>Ndrg3</i>        | 2.7  | 2.53 | 2.62 | 2.4  |
| ENSMUSG00000027636 | <i>Sla2</i>         | 5.1  | 4.28 | 4.88 | 4.72 |
| ENSMUSG00000027637 | <i>1110008F13Ri</i> | 7.4  | 6.47 | 7.08 | 6.87 |
| ENSMUSG00000027639 | <i>Samhd1</i>       | 2.66 | 2.06 | 2.32 | 1.99 |
| ENSMUSG00000027642 | <i>Rpn2</i>         | 6.59 | 6.67 | 6.44 | 6.34 |
| ENSMUSG00000027649 | <i>Ctnnbl1</i>      | 2.97 | 3.02 | 3.06 | 2.97 |
| ENSMUSG00000027650 | <i>2610036D13Ri</i> | 2.37 | 2.69 | 2.67 | 2.5  |
| ENSMUSG00000027651 | <i>2610304G08Ri</i> | 3.59 | 3.61 | 3.45 | 3.36 |
| ENSMUSG00000027652 | <i>B230339M05Ri</i> | 2.45 | 1.91 | 2.25 | 1.92 |
| ENSMUSG00000027655 | <i>Dhx35</i>        | 1.66 | 1.76 | 1.81 | 1.08 |
| ENSMUSG00000027660 | <i>Skil</i>         | 2.43 | 2.25 | 1.23 | 1.21 |
| ENSMUSG00000027663 | <i>Zmat3</i>        | 1.18 | 1.03 | 1.49 | 1.03 |
| ENSMUSG00000027665 | <i>Pik3ca</i>       | 3.89 | 3.14 | 3.62 | 3.18 |
| ENSMUSG00000027667 | <i>Zfp639</i>       | 3.3  | 2.94 | 3.53 | 3    |
| ENSMUSG00000027668 | <i>Mfn1</i>         | 4.57 | 4.38 | 4.75 | 4.37 |
| ENSMUSG00000027671 | <i>Actl6a</i>       | 3.32 | 3.47 | 3.42 | 3.33 |
| ENSMUSG00000027673 | <i>Ndufb5</i>       | 7.07 | 6.41 | 6.73 | 6.1  |
| ENSMUSG00000027677 | <i>mKIAA1980</i>    | 1.7  | 0.51 | 1.05 | 0.58 |
| ENSMUSG00000027678 | <i>Ncoa3</i>        | 2.57 | 2.75 | 2.67 | 2.46 |
| ENSMUSG00000027679 | <i>Dnajc19</i>      | 2.68 | 2.15 | 2.63 | 2.19 |
| ENSMUSG00000027680 | <i>Fxr1h</i>        | 5.08 | 3.79 | 4.5  | 4.14 |
| ENSMUSG00000027690 | <i>Slc2a2</i>       | 7.34 | 6.63 | 7.7  | 7.27 |
| ENSMUSG00000027695 | <i>Pld1</i>         | 1.92 | 1.03 | 1.33 | 0.29 |
| ENSMUSG00000027698 | <i>Aadacl1</i>      | 3.82 | 3.24 | 3.7  | 2.92 |
| ENSMUSG00000027706 | <i>Tloc1</i>        | 7.26 | 6.42 | 6.67 | 6.36 |
| ENSMUSG00000027708 | <i>Dcun1d1</i>      | 3.35 | 2.15 | 2.8  | 2.37 |
| ENSMUSG00000027709 | <i>Mccc1</i>        | 5.1  | 5.03 | 5.44 | 4.88 |
| ENSMUSG00000027710 | <i>Acad9</i>        | 4.57 | 4.6  | 4.29 | 3.88 |

|                    |                  |      |      |      |      |
|--------------------|------------------|------|------|------|------|
| ENSMUSG00000027712 | <i>Anxa5</i>     | 5.77 | 5.83 | 5.84 | 5.47 |
| ENSMUSG00000027714 | <i>Exosc9</i>    | 3.53 | 2.97 | 3.48 | 2.65 |
| ENSMUSG00000027715 | <i>Ccna2</i>     | 0.62 | 0.56 | 1.12 | 0.13 |
| ENSMUSG00000027722 | <i>Spata5</i>    | 1.42 | 0.96 | 1.2  | 1.01 |
| ENSMUSG00000027739 | <i>Rab33b</i>    | 2    | 1.78 | 2.07 | 1.62 |
| ENSMUSG00000027742 | <i>Cog6</i>      | 3.69 | 3.79 | 3.44 | 3.25 |
| ENSMUSG00000027746 | <i>Ufm1</i>      | 2.82 | 2.79 | 2.76 | 2.54 |
| ENSMUSG00000027750 | <i>Postn</i>     | 2.54 | 1.12 | 1.82 | 1.98 |
| ENSMUSG00000027751 | <i>D3Ert300e</i> | 2.42 | 2.16 | 2.51 | 1.92 |
| ENSMUSG00000027752 | <i>Exosc8</i>    | 3.21 | 2.68 | 3.14 | 2.43 |
| ENSMUSG00000027761 | <i>Aadac</i>     | 8.53 | 8.04 | 8.14 | 7.56 |
| ENSMUSG00000027762 | <i>Sucnr1</i>    | 3.9  | 3.5  | 3.46 | 1.92 |
| ENSMUSG00000027763 | <i>Mbnl1</i>     | 5.16 | 4.16 | 4.99 | 4.63 |
| ENSMUSG00000027765 | <i>P2ry1</i>     | 2.04 | 1.98 | 1.99 | 1.84 |
| ENSMUSG00000027770 | <i>Dhx36</i>     | 4.07 | 3.02 | 3.55 | 2.9  |
| ENSMUSG00000027774 | <i>Gfm1</i>      | 5.88 | 5.38 | 5.68 | 5.18 |
| ENSMUSG00000027775 | <i>Mfsd1</i>     | 5.81 | 5.15 | 5.53 | 5.35 |
| ENSMUSG00000027778 | <i>Ift80</i>     | 1.08 | 0.59 | 1.36 | 0.9  |
| ENSMUSG00000027782 | <i>Kpna4</i>     | 4.86 | 3.93 | 4.3  | 3.84 |
| ENSMUSG00000027784 | <i>Ppm1l</i>     | 2.24 | 1.92 | 1.9  | 1.77 |
| ENSMUSG00000027787 | <i>Nmd3</i>      | 4.6  | 3.68 | 4.4  | 3.79 |
| ENSMUSG00000027792 | <i>Bche</i>      | 6.41 | 4.71 | 5.51 | 4.86 |
| ENSMUSG00000027796 | <i>Smad9</i>     | 1.98 | 1.04 | 1.39 | 1.38 |
| ENSMUSG00000027800 | <i>Tm4sf1</i>    | 3.56 | 2.49 | 3.27 | 2.64 |
| ENSMUSG00000027801 | <i>Tm4sf4</i>    | 6.17 | 6.56 | 6.7  | 6.71 |
| ENSMUSG00000027803 | <i>Wwtr1</i>     | 2.74 | 1.96 | 2.81 | 2.22 |
| ENSMUSG00000027804 | <i>Ppid</i>      | 3.77 | 2.85 | 3.23 | 2.87 |
| ENSMUSG00000027806 | <i>Tsc22d2</i>   | 2.64 | 1.82 | 2.4  | 2.41 |
| ENSMUSG00000027808 | <i>D3Ucl1</i>    | 6.86 | 6.95 | 6.29 | 6.44 |
| ENSMUSG00000027809 | <i>Etfdh</i>     | 7.8  | 7.24 | 7.4  | 6.98 |
| ENSMUSG00000027810 | <i>Eif2a</i>     | 5.17 | 4.37 | 5.08 | 4.67 |



|                    |                     |       |       |       |       |
|--------------------|---------------------|-------|-------|-------|-------|
| ENSMUSG00000027820 | <i>Mme</i>          | 3.27  | 2.53  | 2.8   | -0.46 |
| ENSMUSG00000027822 | <i>Slc33a1</i>      | 5.05  | 4.57  | 4.52  | 4.2   |
| ENSMUSG00000027823 | <i>Gmps</i>         | 4.6   | 3.9   | 4.11  | 3.91  |
| ENSMUSG00000027828 | <i>Ssr3</i>         | 6.6   | 6.01  | 6.2   | 5.81  |
| ENSMUSG00000027829 | <i>Ccn1l</i>        | 3.88  | 3.19  | 3.36  | 2.69  |
| ENSMUSG00000027835 | <i>Pdcd10</i>       | 2.12  | -0.35 | 1.38  | 0.55  |
| ENSMUSG00000027845 | <i>Dclre1b</i>      | 1.09  | 0.85  | 0.74  | 1.05  |
| ENSMUSG00000027848 | <i>Olfml3</i>       | 1.43  | 1.49  | 1.7   | 1.15  |
| ENSMUSG00000027852 | <i>Nras</i>         | 3.05  | 3.36  | 2.68  | 2.21  |
| ENSMUSG00000027854 | <i>5730470L24Ri</i> | 1.96  | 2.09  | 1.83  | 1.8   |
| ENSMUSG00000027860 | <i>Vangl1</i>       | 1.83  | 1.96  | 1.95  | 1.33  |
| ENSMUSG00000027865 | <i>Gdap2</i>        | 4.14  | 3.82  | 3.84  | 3.65  |
| ENSMUSG00000027870 | <i>Hao3</i>         | 6.12  | 5.32  | 5.63  | 4.75  |
| ENSMUSG00000027875 | <i>Hmgcs2</i>       | 10.57 | 10.21 | 10.67 | 10.37 |
| ENSMUSG00000027878 | <i>Notch2</i>       | 1.61  | 2.66  | 2.47  | 2.35  |
| ENSMUSG00000027879 | <i>Sec22b</i>       | 4.27  | 4.18  | 4.22  | 4.16  |
| ENSMUSG00000027881 | <i>Prpf38b</i>      | 4.18  | 4.1   | 4.07  | 3.71  |
| ENSMUSG00000027882 | <i>Stxbp3a</i>      | 3.61  | 2.57  | 3.55  | 2.81  |
| ENSMUSG00000027883 | <i>Gpsm2</i>        | 2.71  | 1.97  | 2.82  | 2.52  |
| ENSMUSG00000027884 | <i>Clcc1</i>        | 4.27  | 4.37  | 4.5   | 4.08  |
| ENSMUSG00000027889 | <i>Ampd2</i>        | 2.66  | 3.75  | 3.21  | 3.34  |
| ENSMUSG00000027890 | <i>Gstm4</i>        | 6.3   | 6.36  | 6.09  | 5.63  |
| ENSMUSG00000027893 | <i>Ahcyl1</i>       | 5.57  | 5.09  | 5.01  | 4.77  |
| ENSMUSG00000027900 | <i>Tmem77</i>       | 5.82  | 4.66  | 5.39  | 5.11  |
| ENSMUSG00000027901 | <i>Dennd2d</i>      | 1.24  | 0.8   | 1.68  | 0.96  |
| ENSMUSG00000027905 | <i>Ddx20</i>        | 2.99  | 2.52  | 2.7   | 2.36  |
| ENSMUSG00000027931 | <i>Npr1</i>         | 2.28  | 3.19  | 2.52  | 2.6   |
| ENSMUSG00000027933 | <i>Ints3</i>        | 3.31  | 3.73  | 3.57  | 3.18  |
| ENSMUSG00000027935 | <i>Rab13</i>        | 1.78  | 1.77  | 1.12  | 1.66  |
| ENSMUSG00000027936 | <i>Crtc2</i>        | 3.6   | 4.22  | 4.16  | 4     |
| ENSMUSG00000027937 | <i>Jtb</i>          | 5.41  | 5.3   | 5.1   | 4.89  |

|                    |                     |       |       |       |       |
|--------------------|---------------------|-------|-------|-------|-------|
| ENSMUSG00000027940 | <i>Tpm3</i>         | 3.41  | 3.35  | 2.92  | 3.25  |
| ENSMUSG00000027942 | <i>4933434E20Ri</i> | 3.59  | 3.55  | 3.41  | 3.43  |
| ENSMUSG00000027944 | <i>Hax1</i>         | 3.43  | 3.58  | 3.74  | 3.51  |
| ENSMUSG00000027947 | <i>Il6ra</i>        | 5.42  | 5.72  | 5.54  | 5.52  |
| ENSMUSG00000027951 | <i>Adar</i>         | 3.03  | 2.69  | 2.64  | 3     |
| ENSMUSG00000027952 | <i>Pmvk</i>         | 4.81  | 5.63  | 4.6   | 4.66  |
| ENSMUSG00000027953 | <i>Rag1apl</i>      | 3.4   | 3.42  | 3.56  | 3.15  |
| ENSMUSG00000027954 | <i>Efnal</i>        | 3.64  | 4.49  | 4.13  | 3.8   |
| ENSMUSG00000027956 | <i>Tmem144</i>      | 1.75  | 1.29  | 1.72  | 0.94  |
| ENSMUSG00000027957 | <i>Slc35a3</i>      | 4.72  | 3.74  | 4.15  | 3.68  |
| ENSMUSG00000027958 | <i>Hiat1</i>        | 4.5   | 4.05  | 4.15  | 3.66  |
| ENSMUSG00000027962 | <i>Vcam1</i>        | 3.55  | 2.29  | 3.41  | 1.89  |
| ENSMUSG00000027963 | <i>Extl2</i>        | 2.05  | 1.81  | 2.29  | 1.77  |
| ENSMUSG00000027968 | <i>Larp7</i>        | 2.25  | 2.24  | 2.32  | 1.73  |
| ENSMUSG00000027981 | <i>Amy1</i>         | 2.39  | 0.88  | 2.22  | 1.25  |
| ENSMUSG00000027984 | <i>Hadh</i>         | 8.23  | 8.38  | 8.22  | 7.88  |
| ENSMUSG00000027993 | <i>Trim2</i>        | 2.83  | 1.78  | 2.51  | 1.53  |
| ENSMUSG00000027997 | <i>Casp6</i>        | 4.84  | 4.64  | 4.89  | 4.44  |
| ENSMUSG00000027998 | <i>Plrg1</i>        | 4.32  | 4.19  | 3.96  | 3.79  |
| ENSMUSG00000027999 | <i>Pla2g12a</i>     | 3.75  | 4.36  | 3.8   | 3.97  |
| ENSMUSG00000028001 | <i>Fga</i>          | 10.87 | 11.22 | 10.93 | 10.83 |
| ENSMUSG00000028003 | <i>Lrat</i>         | 2.44  | 1.29  | 2.06  | 1.37  |
| ENSMUSG00000028005 | <i>Gucylb3</i>      | 1.54  | 1.03  | 1.13  | 0.93  |
| ENSMUSG00000028007 | <i>Snx7</i>         | 3.46  | 3.3   | 3.15  | 2.65  |
| ENSMUSG00000028008 | <i>Accn5</i>        | 4     | 3.64  | 3.64  | 4.05  |
| ENSMUSG00000028010 | <i>Nola1</i>        | 2.15  | 3.14  | 2.38  | 2.8   |
| ENSMUSG00000028011 | <i>Tdo2</i>         | 10.54 | 9.52  | 10.27 | 9.81  |
| ENSMUSG00000028013 | <i>Ppa2</i>         | 4.99  | 5.11  | 5.18  | 4.6   |
| ENSMUSG00000028015 | <i>Ctso</i>         | 4.82  | 4.37  | 4.59  | 3.75  |
| ENSMUSG00000028016 | <i>Ints12</i>       | 2.92  | 2.33  | 2.68  | 2.39  |
| ENSMUSG00000028018 | <i>Gsted</i>        | 1.47  | 0.31  | 0.66  | 0.47  |

|                    |                     |       |      |      |       |
|--------------------|---------------------|-------|------|------|-------|
| ENSMUSG00000028019 | <i>Pdgfc</i>        | 1.07  | 0.82 | 0.46 | -0.14 |
| ENSMUSG00000028024 | <i>Enpep</i>        | 5.3   | 4.78 | 4.71 | 4.54  |
| ENSMUSG00000028029 | <i>Scyl1</i>        | 4.86  | 4.61 | 4.54 | 4.56  |
| ENSMUSG00000028030 | <i>A630047E20R1</i> | 1.3   | 0.25 | 0.56 | 0.83  |
| ENSMUSG00000028032 | <i>Papss1</i>       | 2.3   | 3.01 | 1.66 | 2.07  |
| ENSMUSG00000028034 | <i>Fubp1</i>        | 2.47  | 2.51 | 2.78 | 2.41  |
| ENSMUSG00000028035 | <i>Dnajb4</i>       | 4.38  | 3.41 | 4.3  | 4.38  |
| ENSMUSG00000028037 | <i>Ifi44</i>        | 1.73  | 0    | 0.6  | 1.26  |
| ENSMUSG00000028041 | <i>Adam15</i>       | -0.07 | 1.54 | 1.12 | 0.79  |
| ENSMUSG00000028042 | <i>Zbtb7b</i>       | 4.47  | 5.21 | 4.28 | 4.31  |
| ENSMUSG00000028048 | <i>Gba</i>          | 3.93  | 4.49 | 4.25 | 4.23  |
| ENSMUSG00000028049 | <i>Scamp3</i>       | 5.27  | 5.24 | 5.35 | 5.28  |
| ENSMUSG00000028051 | <i>Hcn3</i>         | 4.64  | 3.74 | 4.58 | 4.75  |
| ENSMUSG00000028053 | <i>Ash1l</i>        | 3.02  | 2.59 | 2.72 | 2.5   |
| ENSMUSG00000028057 | <i>Rit1</i>         | 3.39  | 3.46 | 3.28 | 2.96  |
| ENSMUSG00000028060 | <i>2810403A07R1</i> | 3.37  | 3.77 | 3.81 | 3.71  |
| ENSMUSG00000028062 | <i>Mapbpip</i>      | 5.91  | 6.4  | 6.38 | 6.24  |
| ENSMUSG00000028063 | <i>Lmna</i>         | 3.07  | 4.38 | 3.81 | 3.96  |
| ENSMUSG00000028064 | <i>Sema4a</i>       | 5.42  | 5.76 | 5.48 | 5.27  |
| ENSMUSG00000028066 | <i>Pmfl</i>         | 4.13  | 4.46 | 4.49 | 4.09  |
| ENSMUSG00000028069 | <i>Gpatch4</i>      | 2.81  | 4.02 | 2.87 | 2.83  |
| ENSMUSG00000028070 | <i>Apoalbp</i>      | 5.91  | 6.28 | 6.29 | 5.97  |
| ENSMUSG00000028073 | <i>3110045G13R1</i> | 1.78  | 2.58 | 2.08 | 1.67  |
| ENSMUSG00000028076 | <i>Cd1d1</i>        | 7.33  | 6.5  | 6.74 | 6.32  |
| ENSMUSG00000028080 | <i>Lrba</i>         | 2.25  | 1.85 | 2.04 | 1.48  |
| ENSMUSG00000028081 | <i>Rps3a</i>        | 2.89  | 2.52 | 2.54 | 0.61  |
| ENSMUSG00000028082 | <i>Sh3d19</i>       | 4.73  | 4.24 | 4.54 | 4.39  |
| ENSMUSG00000028085 | <i>Pet112l</i>      | 4.67  | 4.18 | 4.53 | 4     |
| ENSMUSG00000028086 | <i>Fbxw6</i>        | 1.45  | 1.44 | 1.32 | 1.15  |
| ENSMUSG00000028088 | <i>Fmo5</i>         | 8.32  | 7.87 | 8.56 | 7.73  |
| ENSMUSG00000028089 | <i>Chd1l</i>        | 2.65  | 2.75 | 2.35 | 1.95  |

|                    |                     |      |      |      |       |
|--------------------|---------------------|------|------|------|-------|
| ENSMUSG00000028093 | <i>Acp6</i>         | 4.78 | 4.76 | 4.73 | 4.61  |
| ENSMUSG00000028096 | <i>Gpr89</i>        | 4.57 | 4.97 | 4.44 | 4.45  |
| ENSMUSG00000028098 | <i>Zfp364</i>       | 5.04 | 4.27 | 4.62 | 4.51  |
| ENSMUSG00000028099 | <i>NA</i>           | 3.97 | 4.16 | 4.27 | 4     |
| ENSMUSG00000028101 | <i>Pias3</i>        | 1.56 | 1.94 | 1.87 | 1.19  |
| ENSMUSG00000028104 | <i>Polr3gl</i>      | 3.34 | 3.06 | 3.09 | 2.74  |
| ENSMUSG00000028106 | <i>4930535B03Ri</i> | 2.29 | 2.25 | 2.46 | 2.3   |
| ENSMUSG00000028107 | <i>Tars2</i>        | 3.99 | 4.31 | 4.06 | 3.81  |
| ENSMUSG00000028108 | <i>Ecm1</i>         | 6.5  | 7.06 | 6.79 | 6.78  |
| ENSMUSG00000028114 | <i>mKIAA1627</i>    | 3.07 | 2.58 | 2.87 | 2.23  |
| ENSMUSG00000028121 | <i>Bcar3</i>        | 3.55 | 4.77 | 4.27 | 4.14  |
| ENSMUSG00000028124 | <i>Gclm</i>         | 6.83 | 6.96 | 6.82 | 6.74  |
| ENSMUSG00000028126 | <i>Pip5k1a</i>      | 2.27 | 2.42 | 2.46 | 2.52  |
| ENSMUSG00000028127 | <i>Abcd3</i>        | 7.73 | 6.69 | 7.12 | 6.42  |
| ENSMUSG00000028128 | <i>F3</i>           | 1.33 | 0.13 | 1.2  | 0.12  |
| ENSMUSG00000028132 | <i>Tmem56</i>       | 6.86 | 5.89 | 6.17 | 5.44  |
| ENSMUSG00000028133 | <i>Rwdd3</i>        | 1.09 | 0.89 | 0.45 | -0.03 |
| ENSMUSG00000028134 | <i>Ptbp2</i>        | 1.71 | 1.39 | 1.64 | 1.18  |
| ENSMUSG00000028136 | <i>Snx27</i>        | 3.44 | 3.33 | 3.27 | 3     |
| ENSMUSG00000028138 | <i>Adh5</i>         | 8.04 | 7.68 | 7.85 | 7.48  |
| ENSMUSG00000028140 | <i>Mrpl9</i>        | 4.78 | 4.46 | 5.06 | 4.57  |
| ENSMUSG00000028145 | <i>Them4</i>        | 4.27 | 3.32 | 4.22 | 3.77  |
| ENSMUSG00000028149 | <i>Rap1gds1</i>     | 3.8  | 3.61 | 3.78 | 3.55  |
| ENSMUSG00000028150 | <i>Rorc</i>         | 4.16 | 4.1  | 4.41 | 4.18  |
| ENSMUSG00000028156 | <i>Eif4e</i>        | 3.25 | 2.87 | 3.18 | 2.71  |
| ENSMUSG00000028158 | <i>Mttp</i>         | 7.12 | 6.76 | 7.23 | 7.01  |
| ENSMUSG00000028161 | <i>Ppp3ca</i>       | 3.82 | 3.58 | 4.03 | 3.84  |
| ENSMUSG00000028163 | <i>Nfkb1</i>        | 3.34 | 3.34 | 3.42 | 3.03  |
| ENSMUSG00000028164 | <i>Manba</i>        | 2.51 | 2.15 | 2.71 | 2.1   |
| ENSMUSG00000028165 | <i>Cisd2</i>        | 3.48 | 2.49 | 3.12 | 2.68  |
| ENSMUSG00000028167 | <i>Bdh2</i>         | 3.75 | 3.5  | 3.79 | 3.52  |

|                    |                     |      |      |       |      |
|--------------------|---------------------|------|------|-------|------|
| ENSMUSG00000028173 | <i>Gpr177</i>       | 1.31 | 0.87 | 1.57  | 0.47 |
| ENSMUSG00000028179 | <i>Cth</i>          | 8.91 | 8.22 | 8.7   | 7.99 |
| ENSMUSG00000028180 | <i>Zranb2</i>       | 4.02 | 3.36 | 3.88  | 3.46 |
| ENSMUSG00000028184 | <i>Lphn2</i>        | 2.86 | 3.26 | 3.08  | 2.98 |
| ENSMUSG00000028185 | <i>Dnase2b</i>      | 3.63 | 3.75 | 4.11  | 3.86 |
| ENSMUSG00000028186 | <i>Uox</i>          | 9.58 | 9.3  | 10.13 | 9.89 |
| ENSMUSG00000028187 | <i>Bxdc5</i>        | 4.2  | 4.32 | 4.49  | 4.11 |
| ENSMUSG00000028189 | <i>Ctbs</i>         | 2.83 | 2.04 | 2.69  | 2.49 |
| ENSMUSG00000028191 | <i>Bcl10</i>        | 3.24 | 2.41 | 2.7   | 2.6  |
| ENSMUSG00000028194 | <i>Ddah1</i>        | 6.46 | 6.31 | 6.62  | 5.9  |
| ENSMUSG00000028195 | <i>Cyr61</i>        | 2.12 | 2.27 | 2.87  | 3.13 |
| ENSMUSG00000028199 | <i>Cryz</i>         | 6.16 | 5.95 | 6.13  | 5.75 |
| ENSMUSG00000028207 | <i>Asph</i>         | 2.29 | 1.42 | 1.73  | 1.28 |
| ENSMUSG00000028211 | <i>Trp53inpl</i>    | 4.75 | 3.76 | 4.63  | 4.49 |
| ENSMUSG00000028218 | <i>6720467C03Ri</i> | 3.09 | 2.81 | 3.11  | 2.38 |
| ENSMUSG00000028221 | <i>Tmem55a</i>      | 3.27 | 2.58 | 3.39  | 2.95 |
| ENSMUSG00000028223 | <i>Decr1</i>        | 7.43 | 6.5  | 6.95  | 6.51 |
| ENSMUSG00000028224 | <i>Nbn</i>          | 3.68 | 3.11 | 3.35  | 3.04 |
| ENSMUSG00000028228 | <i>Cpne3</i>        | 4.24 | 2.9  | 3.77  | 3.22 |
| ENSMUSG00000028229 | <i>2410005O16Ri</i> | 4.69 | 4.05 | 4.75  | 3.9  |
| ENSMUSG00000028232 | <i>Tmem68</i>       | 2.12 | 1.18 | 2.04  | 1.72 |
| ENSMUSG00000028233 | <i>Tgs1</i>         | 1.86 | 1.5  | 1.72  | 1.16 |
| ENSMUSG00000028234 | <i>Rps20</i>        | 5.06 | 6.17 | 6.21  | 6.2  |
| ENSMUSG00000028238 | <i>Atp6v0d2</i>     | 3.41 | 2.48 | 2.78  | 2.07 |
| ENSMUSG00000028240 | <i>Cyp7a1</i>       | 4.68 | 1.55 | 6.77  | 6.02 |
| ENSMUSG00000028243 | <i>3110003A22Ri</i> | 1.89 | 1.09 | 1.8   | 0.92 |
| ENSMUSG00000028245 | <i>Nsmaf</i>        | 2.63 | 2.55 | 2.92  | 2.11 |
| ENSMUSG00000028247 | <i>Coq3</i>         | 3.49 | 3.09 | 3.7   | 3.39 |
| ENSMUSG00000028248 | <i>NA</i>           | 2.38 | 1.83 | 2.44  | 1.96 |
| ENSMUSG00000028249 | <i>Sdcbp</i>        | 4.41 | 3.85 | 3.96  | 3.79 |
| ENSMUSG00000028251 | <i>NA</i>           | 4.71 | 3.78 | 4.59  | 3.98 |

|                    |                     |       |       |       |       |
|--------------------|---------------------|-------|-------|-------|-------|
| ENSMUSG00000028252 | <i>Ccnc</i>         | 3.66  | 2.38  | 3.33  | 2.76  |
| ENSMUSG00000028256 | <i>Odf2l</i>        | 1.93  | 0.85  | 1.63  | 1.02  |
| ENSMUSG00000028261 | <i>I110007M04Ri</i> | 4.71  | 4.22  | 4.78  | 4.27  |
| ENSMUSG00000028266 | <i>Lmo4</i>         | 3.01  | 3.32  | 3.1   | 2.72  |
| ENSMUSG00000028268 | <i>Gbp3</i>         | 2.98  | 1.25  | 1.29  | 1.88  |
| ENSMUSG00000028269 | <i>Gbp1</i>         | 2.43  | 1.2   | 0.62  | 1.27  |
| ENSMUSG00000028270 | <i>Gbp2</i>         | 2.96  | 1.63  | 1.42  | 1.42  |
| ENSMUSG00000028271 | <i>Gtf2b</i>        | 3.88  | 3.5   | 3.62  | 3.36  |
| ENSMUSG00000028273 | <i>Pdlim5</i>       | 4.19  | 3.35  | 3.56  | 3.21  |
| ENSMUSG00000028274 | <i>Rngtt</i>        | 2.24  | 1.25  | 1.93  | 1.65  |
| ENSMUSG00000028277 | <i>Ube2j1</i>       | 4.41  | 4.46  | 4.48  | 4.44  |
| ENSMUSG00000028282 | <i>Casp8ap2</i>     | 1.17  | -0.14 | 0.43  | 0.01  |
| ENSMUSG00000028284 | <i>Map3k7</i>       | 3.6   | 3.21  | 3.19  | 3.12  |
| ENSMUSG00000028291 | <i>2700059D21Ri</i> | 3.99  | 3.63  | 4     | 3.7   |
| ENSMUSG00000028292 | <i>Rars2</i>        | 3.17  | 3.1   | 3.07  | 2.28  |
| ENSMUSG00000028293 | <i>Slc35a1</i>      | 4.12  | 3.95  | 3.95  | 3.35  |
| ENSMUSG00000028295 | <i>1810030N24Ri</i> | 3.8   | 2.88  | 3.24  | 3.13  |
| ENSMUSG00000028300 | <i>3110043O21Ri</i> | 2.36  | 1.82  | 2.23  | 1.82  |
| ENSMUSG00000028307 | <i>Aldob</i>        | 11.31 | 11.13 | 11.61 | 11.24 |
| ENSMUSG00000028309 | <i>mKIAA4116</i>    | 3.22  | 3.31  | 3.16  | 2.75  |
| ENSMUSG00000028318 | <i>Polr1e</i>       | 1.15  | 2.16  | 1.71  | 1.83  |
| ENSMUSG00000028322 | <i>Exosc3</i>       | 3.2   | 3.65  | 3.25  | 2.7   |
| ENSMUSG00000028327 | <i>1300002K09Ri</i> | 6.13  | 6.25  | 5.67  | 5.55  |
| ENSMUSG00000028328 | <i>Tmod1</i>        | 2.14  | 1.53  | 2.21  | 1.78  |
| ENSMUSG00000028329 | <i>Xpa</i>          | 3.45  | 3.58  | 3.82  | 3.08  |
| ENSMUSG00000028330 | <i>AU014645</i>     | 3.62  | 3.7   | 3.65  | 3.47  |
| ENSMUSG00000028331 | <i>5830415F09Ri</i> | 0.93  | 1.05  | 1.09  | 0.81  |
| ENSMUSG00000028333 | <i>Anp32b</i>       | 3.95  | 4.58  | 4.32  | 3.69  |
| ENSMUSG00000028334 | <i>Nans</i>         | 3.31  | 3.98  | 3.24  | 3.41  |
| ENSMUSG00000028339 | <i>Coll5a1</i>      | 1.05  | -0.87 | 0.84  | -0.09 |
| ENSMUSG00000028343 | <i>Txndc4</i>       | 5.74  | 5     | 5.29  | 4.79  |

|                    |                     |       |       |       |       |
|--------------------|---------------------|-------|-------|-------|-------|
| ENSMUSG00000028344 | <i>inv</i>          | 2.16  | 2.56  | 2.64  | 2.81  |
| ENSMUSG00000028345 | <i>Tex10</i>        | 2.03  | 1.92  | 1.92  | 1.53  |
| ENSMUSG00000028356 | <i>Ambp</i>         | 10.65 | 10.72 | 10.39 | 10.69 |
| ENSMUSG00000028359 | <i>Orm3</i>         | 4.89  | 4.58  | 5.42  | 4.09  |
| ENSMUSG00000028367 | <i>Txn1</i>         | 7.71  | 6.64  | 6.72  | 6.19  |
| ENSMUSG00000028381 | <i>Ugcg</i>         | 3.3   | 2     | 3.07  | 3.16  |
| ENSMUSG00000028382 | <i>AK088920</i>     | 4.4   | 3.44  | 3.76  | 3.47  |
| ENSMUSG00000028383 | <i>Hsd12</i>        | 6.23  | 5.25  | 5.78  | 5.36  |
| ENSMUSG00000028385 | <i>Snx30</i>        | 1.34  | 0.95  | 1.46  | 1     |
| ENSMUSG00000028393 | <i>Alad</i>         | 7.54  | 7.52  | 7.21  | 7.09  |
| ENSMUSG00000028394 | <i>Pole3</i>        | 3.62  | 3.64  | 3.63  | 3.42  |
| ENSMUSG00000028397 | <i>Jmjd2c</i>       | 1.63  | 1.37  | 1.54  | 1.45  |
| ENSMUSG00000028398 | <i>3110001D03Ri</i> | 4.36  | 4.39  | 4.52  | 4.18  |
| ENSMUSG00000028399 | <i>Ptprd</i>        | 4.38  | 3.51  | 4     | 3.77  |
| ENSMUSG00000028402 | <i>Mpdz</i>         | 2.92  | 2.16  | 2.5   | 1.72  |
| ENSMUSG00000028403 | <i>Zdhhc21</i>      | 1.64  | 0.79  | 0.43  | 0.2   |
| ENSMUSG00000028405 | <i>Acol</i>         | 6.5   | 6.54  | 6.36  | 6.06  |
| ENSMUSG00000028407 | <i>NA</i>           | 3.53  | 3     | 3.35  | 3.12  |
| ENSMUSG00000028409 | <i>Smu1</i>         | 4.96  | 5.2   | 4.9   | 4.7   |
| ENSMUSG00000028410 | <i>Dnaja1</i>       | 5.74  | 4.5   | 5.03  | 4.69  |
| ENSMUSG00000028412 | <i>Slc44a1</i>      | 3.44  | 3.5   | 3.24  | 2.78  |
| ENSMUSG00000028413 | <i>B4galt1</i>      | 4.29  | 3.47  | 3.19  | 3.3   |
| ENSMUSG00000028414 | <i>Fcmd</i>         | 1.39  | -0.02 | 1.33  | 1.03  |
| ENSMUSG00000028416 | <i>Bag1</i>         | 6.14  | 6.14  | 5.78  | 5.63  |
| ENSMUSG00000028419 | <i>Chmp5</i>        | 5.13  | 4.69  | 5.08  | 4.61  |
| ENSMUSG00000028420 | <i>Tmem38b</i>      | 4.89  | 4.57  | 4.68  | 4.47  |
| ENSMUSG00000028423 | <i>Nfx1</i>         | 3.73  | 3.61  | 3.73  | 3.73  |
| ENSMUSG00000028426 | <i>Rad23b</i>       | 6.04  | 5.97  | 5.96  | 5.94  |
| ENSMUSG00000028430 | <i>Nol6</i>         | 2.67  | 3.84  | 3.1   | 3.2   |
| ENSMUSG00000028431 | <i>Ikkkap</i>       | 1.08  | 1.71  | 1.2   | 1.26  |
| ENSMUSG00000028433 | <i>Ubap2</i>        | 3     | 3.61  | 3.25  | 3.17  |

|                    |                     |      |      |      |      |
|--------------------|---------------------|------|------|------|------|
| ENSMUSG00000028434 | <i>NA</i>           | 4.92 | 4.79 | 4.76 | 4.53 |
| ENSMUSG00000028436 | <i>Wdr40a</i>       | 4.15 | 3.94 | 4.02 | 3.64 |
| ENSMUSG00000028437 | <i>Ubap1</i>        | 4.89 | 4.82 | 4.72 | 4.46 |
| ENSMUSG00000028439 | <i>2310028H24Rt</i> | 1.31 | 1.8  | 1.27 | 0.56 |
| ENSMUSG00000028443 | <i>Nudt2</i>        | 3.88 | 3.26 | 3.63 | 3.58 |
| ENSMUSG00000028444 | <i>Cntfr</i>        | 0.78 | 1.61 | 1.9  | 1.37 |
| ENSMUSG00000028445 | <i>NA</i>           | 4.2  | 5.4  | 3.74 | 5.23 |
| ENSMUSG00000028447 | <i>Dctn3</i>        | 4.94 | 5.26 | 4.76 | 4.79 |
| ENSMUSG00000028452 | <i>Vcp</i>          | 3.95 | 3.71 | 3.4  | 1.71 |
| ENSMUSG00000028454 | <i>Pigo</i>         | 2.32 | 2.75 | 2.93 | 2.81 |
| ENSMUSG00000028455 | <i>Stoml2</i>       | 4.8  | 5.16 | 4.9  | 4.83 |
| ENSMUSG00000028458 | <i>Tesk1</i>        | 2.79 | 3.61 | 3.18 | 3.01 |
| ENSMUSG00000028459 | <i>Cd72</i>         | 0.73 | 1.28 | 1.45 | 0.37 |
| ENSMUSG00000028461 | <i>LOC622404</i>    | 5.84 | 6.11 | 6.26 | 6.11 |
| ENSMUSG00000028464 | <i>Tpm2</i>         | 1.28 | 1.36 | 2.8  | 2.26 |
| ENSMUSG00000028465 | <i>Tln1</i>         | 3.85 | 4.27 | 4.14 | 3.86 |
| ENSMUSG00000028466 | <i>Creb3</i>        | 4.57 | 5.24 | 5.2  | 5.04 |
| ENSMUSG00000028467 | <i>mKIAA1605</i>    | 1.56 | 2.22 | 2.01 | 1.45 |
| ENSMUSG00000028468 | <i>1110029E03Ri</i> | 3.39 | 3.7  | 3.66 | 3.46 |
| ENSMUSG00000028469 | <i>Npr2</i>         | 3.87 | 4.1  | 3.97 | 3.45 |
| ENSMUSG00000028470 | <i>Hint2</i>        | 6.57 | 6.35 | 6.82 | 6.3  |
| ENSMUSG00000028476 | <i>Reck</i>         | 1.35 | 0.15 | 1.44 | 0.64 |
| ENSMUSG00000028478 | <i>Clta</i>         | 6.22 | 6.6  | 6.63 | 6.34 |
| ENSMUSG00000028479 | <i>Gne</i>          | 5.65 | 5.77 | 5.83 | 5.52 |
| ENSMUSG00000028483 | <i>Snpc3</i>        | 1.25 | 0.79 | 1.11 | 0.53 |
| ENSMUSG00000028484 | <i>Psip1</i>        | 2.9  | 1.91 | 2.48 | 1.81 |
| ENSMUSG00000028494 | <i>Adfp</i>         | 8.08 | 7.94 | 7.74 | 7.5  |
| ENSMUSG00000028514 | <i>NA</i>           | 3.35 | 3.32 | 3.36 | 3.08 |
| ENSMUSG00000028517 | <i>Ppap2b</i>       | 6.37 | 6.61 | 6.49 | 6.25 |
| ENSMUSG00000028518 | <i>Prkaa2</i>       | 3.16 | 2.94 | 3.11 | 2.94 |
| ENSMUSG00000028521 | <i>Slc35d1</i>      | 5    | 5.11 | 5.32 | 4.82 |



|                    |                      |      |       |      |      |
|--------------------|----------------------|------|-------|------|------|
| ENSMUSG00000028522 | <i>Mier1</i>         | 4.3  | 3.29  | 4    | 3.38 |
| ENSMUSG00000028525 | <i>Pde4b</i>         | 1.61 | 1.17  | 0.94 | 1    |
| ENSMUSG00000028527 | <i>Ak311</i>         | 4.57 | 3.85  | 4.81 | 4.34 |
| ENSMUSG00000028530 | <i>Jak1</i>          | 5.07 | 4.82  | 4.8  | 4.62 |
| ENSMUSG00000028536 | <i>2610528J11Rik</i> | 3.53 | 3.76  | 4.02 | 3.43 |
| ENSMUSG00000028538 | <i>St3gal3</i>       | 4.12 | 4.64  | 4.88 | 4.95 |
| ENSMUSG00000028540 | <i>Dph2</i>          | 1.28 | 1.9   | 1.3  | 1.44 |
| ENSMUSG00000028542 | <i>Slc6a9</i>        | 4.09 | 4.59  | 4.36 | 4.39 |
| ENSMUSG00000028549 | <i>Itgb3bp</i>       | 1.21 | -0.17 | 1.17 | 0.02 |
| ENSMUSG00000028550 | <i>Atg4c</i>         | 3.52 | 2.95  | 3.31 | 2.89 |
| ENSMUSG00000028551 | <i>Cdkn2c</i>        | 1.17 | 0.21  | 1.61 | 0.53 |
| ENSMUSG00000028552 | <i>Eps15</i>         | 4.06 | 3.21  | 3.83 | 3.26 |
| ENSMUSG00000028553 | <i>Angptl3</i>       | 9.54 | 8.83  | 9.59 | 8.95 |
| ENSMUSG00000028556 | <i>Dock7</i>         | 1.5  | 1.07  | 1.19 | 1.02 |
| ENSMUSG00000028557 | <i>AK139182</i>      | 5.91 | 5.18  | 5.26 | 4.73 |
| ENSMUSG00000028559 | <i>Osbp19</i>        | 5.64 | 5.3   | 5.63 | 5.27 |
| ENSMUSG00000028560 | <i>Usp1</i>          | 2.75 | 1.8   | 2.29 | 1.96 |
| ENSMUSG00000028563 | <i>Tm2d1</i>         | 1.8  | 0.9   | 1.63 | 1.3  |
| ENSMUSG00000028565 | <i>mKIAA1439</i>     | 5.1  | 4.44  | 4.94 | 4.6  |
| ENSMUSG00000028567 | <i>Txndc12</i>       | 5.34 | 5.27  | 5.27 | 5.16 |
| ENSMUSG00000028572 | <i>Hook1</i>         | 3.93 | 3.2   | 3.36 | 3.09 |
| ENSMUSG00000028573 | <i>2310009E04Ri</i>  | 5.27 | 5.16  | 5.28 | 4.83 |
| ENSMUSG00000028576 | <i>Ift74</i>         | 1.29 | 0.11  | 1.02 | 0.14 |
| ENSMUSG00000028577 | <i>Plaa</i>          | 3.69 | 3.3   | 3.28 | 2.9  |
| ENSMUSG00000028578 | <i>5830433M19R</i>   | 1.84 | 1.28  | 1.53 | 1.39 |
| ENSMUSG00000028580 | <i>Pum1</i>          | 3.85 | 3.7   | 4.02 | 3.8  |
| ENSMUSG00000028581 | <i>Laptm5</i>        | 3.67 | 3.84  | 3.96 | 3.85 |
| ENSMUSG00000028582 | <i>Cc2d1b</i>        | 1.86 | 2.21  | 2.12 | 1.8  |
| ENSMUSG00000028597 | <i>Gpx7</i>          | 1.02 | 0.58  | 0.93 | 0.67 |
| ENSMUSG00000028599 | <i>Tnfrsf1b</i>      | 3.79 | 3.71  | 4.11 | 4.15 |
| ENSMUSG00000028601 | <i>Echdc2</i>        | 5.43 | 6.09  | 5.96 | 5.72 |

|                    |                      |      |      |      |       |
|--------------------|----------------------|------|------|------|-------|
| ENSMUSG00000028603 | <i>Scp2</i>          | 8.07 | 8.05 | 7.96 | 8.27  |
| ENSMUSG00000028607 | <i>Cpt2</i>          | 7.1  | 6.84 | 6.98 | 6.55  |
| ENSMUSG00000028608 | <i>0610037L13Ri</i>  | 3.24 | 3.89 | 3.5  | 3.46  |
| ENSMUSG00000028609 | <i>Magoh</i>         | 4.85 | 4.11 | 4.49 | 4.47  |
| ENSMUSG00000028614 | <i>Tmem48</i>        | 2.82 | 2.18 | 2.55 | 2.49  |
| ENSMUSG00000028617 | <i>Lrrc42</i>        | 2.72 | 3.25 | 3.13 | 3.33  |
| ENSMUSG00000028618 | <i>Tmem59</i>        | 8.03 | 7.43 | 7.9  | 7.62  |
| ENSMUSG00000028619 | <i>2210012G02Ri</i>  | 1.02 | 1.65 | 1.28 | 1.48  |
| ENSMUSG00000028621 | <i>mFLJ00377</i>     | 1.65 | 2.23 | 2    | 1.9   |
| ENSMUSG00000028622 | <i>Mrpl37</i>        | 4.87 | 5.26 | 5.19 | 4.92  |
| ENSMUSG00000028629 | <i>3110037I16Rik</i> | 1.38 | 0.79 | 0.52 | -0.52 |
| ENSMUSG00000028630 | <i>Dyrk2</i>         | 3.35 | 4.02 | 3.52 | 3.22  |
| ENSMUSG00000028633 | <i>Ctps</i>          | 0.69 | 1.29 | 1.28 | 1.2   |
| ENSMUSG00000028636 | <i>Ppcs</i>          | 3.06 | 3.13 | 3.15 | 3.15  |
| ENSMUSG00000028639 | <i>Ybx1</i>          | 5.41 | 4.58 | 4.89 | 4.34  |
| ENSMUSG00000028641 | <i>Lepre1</i>        | 2.48 | 3.19 | 2.62 | 2.83  |
| ENSMUSG00000028643 | <i>Ccdc23</i>        | 2.27 | 2.93 | 2.61 | 2.76  |
| ENSMUSG00000028645 | <i>Slc2a1</i>        | 2.46 | 3.15 | 2.28 | 1.93  |
| ENSMUSG00000028646 | <i>Rragc</i>         | 4.84 | 4.48 | 4.91 | 4.28  |
| ENSMUSG00000028647 | <i>amy-1</i>         | 4.51 | 2.7  | 3.63 | 3.2   |
| ENSMUSG00000028649 | <i>NA</i>            | 2.06 | 1.88 | 2.09 | 1.68  |
| ENSMUSG00000028651 | <i>Ppie</i>          | 3.02 | 3.51 | 3.12 | 3.45  |
| ENSMUSG00000028653 | <i>Trit1</i>         | 2.97 | 2.46 | 2.61 | 2.41  |
| ENSMUSG00000028654 | <i>Mycl1</i>         | 3.13 | 2.48 | 3.36 | 2.67  |
| ENSMUSG00000028655 | <i>Mfsd2</i>         | 6.56 | 6.65 | 6.93 | 6.64  |
| ENSMUSG00000028656 | <i>Cap1</i>          | 5.76 | 5.33 | 5.77 | 5.38  |
| ENSMUSG00000028657 | <i>Ppt1</i>          | 4.81 | 4.2  | 4.51 | 3.8   |
| ENSMUSG00000028668 | <i>Tceb3</i>         | 4.3  | 4.17 | 4.17 | 4.1   |
| ENSMUSG00000028669 | <i>1110049F12Rik</i> | 3.7  | 3.77 | 3.78 | 3.36  |
| ENSMUSG00000028670 | <i>Lypla2</i>        | 4.92 | 5.94 | 5.18 | 5.17  |
| ENSMUSG00000028671 | <i>Gale</i>          | 2.3  | 2.58 | 1.56 | 1.41  |

|                    |                      |       |      |      |      |
|--------------------|----------------------|-------|------|------|------|
| ENSMUSG00000028672 | <i>Hmgcl</i>         | 7.31  | 7.8  | 7.41 | 7.37 |
| ENSMUSG00000028673 | <i>Fucal</i>         | 6.13  | 6.23 | 6.03 | 5.99 |
| ENSMUSG00000028675 | <i>Pnrc2</i>         | 5.06  | 4.5  | 5.17 | 4.52 |
| ENSMUSG00000028676 | <i>nssr 1</i>        | 1.78  | 0.41 | 0.95 | 0.56 |
| ENSMUSG00000028677 | <i>4931406120Rik</i> | 2.61  | 3.29 | 2.62 | 2.29 |
| ENSMUSG00000028680 | <i>Plk3</i>          | 4.1   | 3.83 | 4.91 | 5.33 |
| ENSMUSG00000028683 | <i>Eif2b3</i>        | 1.86  | 1.76 | 2.19 | 1.98 |
| ENSMUSG00000028684 | <i>Urod</i>          | 5.74  | 6.17 | 6.06 | 5.96 |
| ENSMUSG00000028688 | <i>Toe1</i>          | 2.25  | 2.18 | 1.43 | 1.52 |
| ENSMUSG00000028689 | <i>0610037D15Ri</i>  | 1.29  | 1.19 | 1.87 | 2.25 |
| ENSMUSG00000028690 | <i>Mmachc</i>        | 3.73  | 3.87 | 4.06 | 3.77 |
| ENSMUSG00000028691 | <i>Prdx1</i>         | 8.28  | 7.8  | 7.95 | 7.69 |
| ENSMUSG00000028692 | <i>Akr1a4</i>        | 8.14  | 8.53 | 8.22 | 8.03 |
| ENSMUSG00000028693 | <i>Nasp</i>          | 2.57  | 2.09 | 2.4  | 1.95 |
| ENSMUSG00000028696 | <i>Ipp</i>           | 2.66  | 2.23 | 2.4  | 2.23 |
| ENSMUSG00000028700 | <i>Pomgnt1</i>       | 2.77  | 3.54 | 2.9  | 3.01 |
| ENSMUSG00000028703 | <i>Lrrc41</i>        | 4.26  | 4.58 | 4.4  | 4.26 |
| ENSMUSG00000028706 | <i>Nsun4</i>         | 3.21  | 3.44 | 3.24 | 3.03 |
| ENSMUSG00000028708 | <i>Mknk1</i>         | 3.33  | 3.13 | 3.31 | 2.91 |
| ENSMUSG00000028709 | <i>Mobkl2c</i>       | 3.05  | 2.95 | 2.73 | 2.33 |
| ENSMUSG00000028712 | <i>NA</i>            | 2.66  | 2.94 | 2.4  | 2.86 |
| ENSMUSG00000028713 | <i>Cyp4b1</i>        | 3.42  | 3.75 | 3.12 | 3.45 |
| ENSMUSG00000028715 | <i>Cyp4a14</i>       | 10.18 | 9.24 | 9.73 | 8.96 |
| ENSMUSG00000028716 | <i>Pdzklip1</i>      | 0.77  | 1.52 | 1.32 | 0.73 |
| ENSMUSG00000028719 | <i>Cmpk</i>          | 5.73  | 4.37 | 5.22 | 4.73 |
| ENSMUSG00000028729 | <i>Ebna1bp2</i>      | 3.94  | 4.71 | 4.12 | 4.13 |
| ENSMUSG00000028737 | <i>Aldh4a1</i>       | 8.07  | 8.25 | 7.99 | 7.64 |
| ENSMUSG00000028741 | <i>Mrto4</i>         | 2.16  | 2.83 | 2.44 | 2.48 |
| ENSMUSG00000028743 | <i>Akr7a5</i>        | 6.53  | 7.18 | 6.82 | 6.92 |
| ENSMUSG00000028744 | <i>Pqlc2</i>         | 1.82  | 2.66 | 2.37 | 2.52 |
| ENSMUSG00000028745 | <i>Capzb</i>         | 6.1   | 5.9  | 6.02 | 5.86 |

|                    |                     |       |      |      |       |
|--------------------|---------------------|-------|------|------|-------|
| ENSMUSG00000028755 | <i>Cda</i>          | 2.7   | 3.68 | 2.86 | 2.71  |
| ENSMUSG00000028756 | <i>Pink1</i>        | 6.14  | 6.7  | 6.29 | 6.2   |
| ENSMUSG00000028757 | <i>Ddost</i>        | 6.31  | 6.97 | 6.23 | 6.18  |
| ENSMUSG00000028759 | <i>Hp1bp3</i>       | 4.79  | 4.5  | 4.65 | 4.46  |
| ENSMUSG00000028760 | <i>Eif4g3</i>       | 2.94  | 3.22 | 3.16 | 2.83  |
| ENSMUSG00000028763 | <i>NA</i>           | 0.93  | 1.99 | 1.41 | 1.51  |
| ENSMUSG00000028766 | <i>Akp2</i>         | 2.89  | 3.32 | 3.57 | 3.37  |
| ENSMUSG00000028771 | <i>Ptpn12</i>       | 3.93  | 3.64 | 3.66 | 3.36  |
| ENSMUSG00000028772 | <i>Zcchc17</i>      | 3.11  | 3.34 | 3.15 | 2.94  |
| ENSMUSG00000028776 | <i>arg1</i>         | 3.28  | 3.94 | 3.31 | 3.21  |
| ENSMUSG00000028779 | <i>Pef1</i>         | 4.56  | 5.35 | 4.89 | 4.69  |
| ENSMUSG00000028788 | <i>Ptp4a2</i>       | 5.82  | 4.7  | 5.37 | 4.91  |
| ENSMUSG00000028790 | <i>Khdrbs1</i>      | 3.28  | 2.7  | 2.87 | 2.63  |
| ENSMUSG00000028792 | <i>Ak2</i>          | 6.49  | 6.41 | 6.73 | 6.53  |
| ENSMUSG00000028793 | <i>NA</i>           | 4     | 4.1  | 4.23 | 3.99  |
| ENSMUSG00000028795 | <i>Ccdc28b</i>      | 1.21  | 1.83 | 2    | 1.78  |
| ENSMUSG00000028796 | <i>Phc2</i>         | 3.32  | 4.02 | 3.37 | 3.35  |
| ENSMUSG00000028797 | <i>2510006D16R1</i> | 5.49  | 5.86 | 5.53 | 5.45  |
| ENSMUSG00000028798 | <i>Eif3i</i>        | 6     | 6.45 | 6.12 | 6.06  |
| ENSMUSG00000028799 | <i>BC039093</i>     | 1.03  | 1.84 | 1.83 | 1.54  |
| ENSMUSG00000028800 | <i>Hdac1</i>        | -0.66 | -1.5 | 1.03 | -0.49 |
| ENSMUSG00000028803 | <i>Npal3</i>        | 1.42  | 1.54 | 2.03 | 1.29  |
| ENSMUSG00000028809 | <i>Srrm1</i>        | 4.01  | 3.87 | 4.05 | 3.63  |
| ENSMUSG00000028811 | <i>Yars</i>         | 4.05  | 4.8  | 4.08 | 4.2   |
| ENSMUSG00000028820 | <i>Sfpq</i>         | 5.07  | 4.96 | 4.62 | 4.44  |
| ENSMUSG00000028821 | <i>Syf2</i>         | 4.78  | 5.12 | 5.13 | 4.78  |
| ENSMUSG00000028822 | <i>Tmem50a</i>      | 6.61  | 6    | 6.44 | 6.23  |
| ENSMUSG00000028826 | <i>Tmem57</i>       | 4.45  | 3.95 | 4.22 | 3.84  |
| ENSMUSG00000028830 | <i>AU040320</i>     | 3.14  | 3.29 | 3.25 | 3.1   |
| ENSMUSG00000028833 | <i>Ncdn</i>         | 2.07  | 3.13 | 2.7  | 2.44  |
| ENSMUSG00000028837 | <i>Psmb2</i>        | 6.65  | 6.6  | 6.52 | 6.33  |

|                    |                     |       |       |      |       |
|--------------------|---------------------|-------|-------|------|-------|
| ENSMUSG00000028838 | <i>Extl1</i>        | 3.22  | 3.42  | 3.71 | 3.66  |
| ENSMUSG00000028840 | <i>Zfp593</i>       | 0.81  | 2.1   | 1.2  | 1.4   |
| ENSMUSG00000028843 | <i>Sh3bgrl3</i>     | 3.01  | 3.54  | 3.9  | 3.18  |
| ENSMUSG00000028847 | <i>Trappc3</i>      | 5.13  | 4.49  | 4.7  | 4.73  |
| ENSMUSG00000028848 | <i>Atpbd1b</i>      | 2.85  | 3.04  | 2.93 | 2.38  |
| ENSMUSG00000028849 | <i>Mtap7d1</i>      | 3.18  | 4     | 3.52 | 3.53  |
| ENSMUSG00000028850 | <i>Gpatch3</i>      | 1.06  | 1.93  | 1.3  | 1.26  |
| ENSMUSG00000028851 | <i>Nudc</i>         | 4.4   | 5.19  | 4.48 | 4.56  |
| ENSMUSG00000028854 | <i>Slc9a1</i>       | 2.18  | 2.62  | 2.52 | 2.29  |
| ENSMUSG00000028857 | <i>D4Ert196e</i>    | 4.04  | 4.23  | 4.04 | 3.92  |
| ENSMUSG00000028860 | <i>slp1</i>         | -3.25 | -0.78 | 1.61 | -0.74 |
| ENSMUSG00000028861 | <i>Mrps15</i>       | 5.69  | 5.05  | 5.4  | 5.23  |
| ENSMUSG00000028863 | <i>2310005N01Ri</i> | 2.81  | 2.71  | 3.24 | 2.28  |
| ENSMUSG00000028864 | <i>Hgf</i>          | 2.66  | 1.77  | 2.3  | 2.15  |
| ENSMUSG00000028868 | <i>Wasf2</i>        | 3.54  | 3.51  | 3.5  | 3.31  |
| ENSMUSG00000028869 | <i>Gnl2</i>         | 3.71  | 3.77  | 3.85 | 3.4   |
| ENSMUSG00000028878 | <i>BC008163</i>     | 2.03  | 2.12  | 2.55 | 2.12  |
| ENSMUSG00000028879 | <i>Stx12</i>        | 4.08  | 3.24  | 3.72 | 3.25  |
| ENSMUSG00000028882 | <i>Ppp1r8</i>       | 3.17  | 3.87  | 3.47 | 3.17  |
| ENSMUSG00000028884 | <i>Rpa2</i>         | 1.09  | 1.67  | 2.24 | 1.53  |
| ENSMUSG00000028886 | <i>Eya3</i>         | 3.17  | 3.07  | 2.85 | 2.73  |
| ENSMUSG00000028889 | <i>Yrdc</i>         | 3.44  | 3.89  | 3.5  | 3.4   |
| ENSMUSG00000028890 | <i>Mtf1</i>         | 2.48  | 2.52  | 2.39 | 2.46  |
| ENSMUSG00000028893 | <i>Sesn2</i>        | 2.52  | 2.87  | 2.53 | 2.54  |
| ENSMUSG00000028894 | <i>Inpp5b</i>       | 3.86  | 3.9   | 4.24 | 3.96  |
| ENSMUSG00000028896 | <i>Rcc1</i>         | 3.9   | 3.26  | 2.67 | 3.09  |
| ENSMUSG00000028898 | <i>Trspap1</i>      | 3.47  | 3.4   | 3.3  | 3.03  |
| ENSMUSG00000028899 | <i>Taf12</i>        | 4.2   | 4.24  | 4.5  | 4.11  |
| ENSMUSG00000028902 | <i>Sf3a3</i>        | 3.8   | 3.71  | 3.29 | 3.03  |
| ENSMUSG00000028906 | <i>Epb4.1</i>       | 4.79  | 4.63  | 4.9  | 4.64  |
| ENSMUSG00000028907 | <i>Utp11l</i>       | 4.71  | 4.77  | 4.63 | 4.17  |

|                    |                 |       |       |      |      |
|--------------------|-----------------|-------|-------|------|------|
| ENSMUSG00000028910 | <i>Mecr</i>     | 4.75  | 5.13  | 4.92 | 4.72 |
| ENSMUSG00000028911 | <i>Sfrs4</i>    | 4.96  | 5     | 4.83 | 4.68 |
| ENSMUSG00000028914 | <i>Casp9</i>    | 3.02  | 3.04  | 2.79 | 2.13 |
| ENSMUSG00000028917 | <i>NA</i>       | 1.66  | 2.81  | 2.34 | 1.87 |
| ENSMUSG00000028919 | <i>Arhgef19</i> | 3.09  | 4     | 4.12 | 2.89 |
| ENSMUSG00000028920 | <i>Fbxo42</i>   | 1.66  | 1.9   | 1.85 | 1.89 |
| ENSMUSG00000028923 | <i>Necap2</i>   | 2.07  | 2.52  | 2.17 | 2.2  |
| ENSMUSG00000028932 | <i>Psmc2</i>    | 6.05  | 6.15  | 6.02 | 5.91 |
| ENSMUSG00000028936 | <i>Rpl22</i>    | 6.42  | 6.64  | 6.65 | 7.19 |
| ENSMUSG00000028937 | <i>Acot7</i>    | 3.82  | 4.4   | 4.19 | 4.21 |
| ENSMUSG00000028944 | <i>Prkag2</i>   | 4.27  | 3.74  | 3.96 | 3.66 |
| ENSMUSG00000028945 | <i>Rheb</i>     | 5.52  | 5.44  | 5.41 | 5.04 |
| ENSMUSG00000028948 | <i>Nol9</i>     | 2.75  | 2.79  | 2.73 | 2.43 |
| ENSMUSG00000028949 | <i>Smarcd3</i>  | 0.03  | 0.33  | 1.13 | 0.39 |
| ENSMUSG00000028952 | <i>Zbtb48</i>   | 2.13  | 2     | 2.85 | 1.69 |
| ENSMUSG00000028953 | <i>Abcf2</i>    | 4.27  | 4.69  | 4.37 | 4.32 |
| ENSMUSG00000028954 | <i>Nub1</i>     | 4.18  | 3.98  | 4.15 | 3.94 |
| ENSMUSG00000028955 | <i>Vamp3</i>    | 3.25  | 2.65  | 3.23 | 2.92 |
| ENSMUSG00000028957 | <i>Per3</i>     | -1.26 | -1.21 | 1.54 | 1.46 |
| ENSMUSG00000028958 | <i>Tmub1</i>    | 2.4   | 2.65  | 3.02 | 2.95 |
| ENSMUSG00000028959 | <i>Fastk</i>    | 3.73  | 4.2   | 4.08 | 3.77 |
| ENSMUSG00000028960 | <i>Ube4b</i>    | 4.06  | 4.08  | 4.37 | 4.01 |
| ENSMUSG00000028961 | <i>Pgd</i>      | 4.53  | 4.69  | 4.34 | 4.22 |
| ENSMUSG00000028962 | <i>Slc4a2</i>   | 3.23  | 4.08  | 3.58 | 3.45 |
| ENSMUSG00000028964 | <i>Park7</i>    | 6.65  | 6.98  | 6.85 | 6.7  |
| ENSMUSG00000028967 | <i>Errfi1</i>   | 9.21  | 8.85  | 9.08 | 8.98 |
| ENSMUSG00000028969 | <i>Cdk5</i>     | 3.04  | 3.32  | 2.87 | 2.97 |
| ENSMUSG00000028970 | <i>Abcb1b</i>   | 2.44  | 2.04  | 2.28 | 1.87 |
| ENSMUSG00000028973 | <i>Abcb8</i>    | 3.52  | 4     | 3.72 | 3.26 |
| ENSMUSG00000028974 | <i>Dffa</i>     | 3.08  | 3.21  | 3.11 | 2.92 |
| ENSMUSG00000028975 | <i>Pex14</i>    | 5.15  | 5.59  | 5.53 | 5.12 |

|                    |                     |      |      |       |      |
|--------------------|---------------------|------|------|-------|------|
| ENSMUSG00000028976 | <i>Slc2a5</i>       | 1.31 | 0.45 | 2.31  | 1.81 |
| ENSMUSG00000028978 | <i>Nos3</i>         | 1.07 | 1.32 | 0.08  | 0.03 |
| ENSMUSG00000028979 | <i>Masp2</i>        | 6.45 | 6.49 | 6.56  | 6.36 |
| ENSMUSG00000028980 | <i>H6pd</i>         | 7.25 | 7.78 | 7.4   | 7.19 |
| ENSMUSG00000028982 | <i>Slc25a33</i>     | 3.81 | 3.72 | 3.47  | 3.35 |
| ENSMUSG00000028986 | <i>Klhl7</i>        | 3.46 | 2.16 | 3     | 2.18 |
| ENSMUSG00000028988 | <i>Ctnnbip1</i>     | 2.22 | 2    | 2.49  | 1.86 |
| ENSMUSG00000028990 | <i>Lzic</i>         | 1.73 | 1.9  | 2.04  | 1.98 |
| ENSMUSG00000028991 | <i>Frap1</i>        | 3.28 | 3.3  | 3.52  | 3.21 |
| ENSMUSG00000028992 | <i>D4Cole1e</i>     | 3.25 | 2.99 | 3.32  | 3.18 |
| ENSMUSG00000028995 | <i>Drctnnb1a</i>    | 2.69 | 0.96 | 2.47  | 0.72 |
| ENSMUSG00000028998 | <i>Tomm7</i>        | 6.75 | 4.4  | 6.07  | 5.55 |
| ENSMUSG00000028999 | <i>Rint1</i>        | 1.82 | 2.16 | 1.72  | 1.92 |
| ENSMUSG00000029003 | <i>Mad2l2</i>       | 4.32 | 4.79 | 3.96  | 3.84 |
| ENSMUSG00000029004 | <i>NA</i>           | 3.43 | 2.83 | 3.35  | 2.99 |
| ENSMUSG00000029007 | <i>Agtrap</i>       | 1.12 | 1.1  | -0.26 | 0.75 |
| ENSMUSG00000029009 | <i>Mthfr</i>        | 1.66 | 2.4  | 0.58  | 0.22 |
| ENSMUSG00000029012 | <i>Orc5l</i>        | 3.75 | 3.19 | 3.66  | 3.3  |
| ENSMUSG00000029014 | <i>Dnajc2</i>       | 2.6  | 1.45 | 2.17  | 1.1  |
| ENSMUSG00000029016 | <i>Clcn6</i>        | 1.09 | 1.21 | 0.01  | 0.5  |
| ENSMUSG00000029017 | <i>Pmpcb</i>        | 6.68 | 5.99 | 6.42  | 5.81 |
| ENSMUSG00000029020 | <i>Mfn2</i>         | 5.11 | 5.23 | 5.4   | 5.05 |
| ENSMUSG00000029022 | <i>D4Wsu114e</i>    | 1.24 | 1.65 | 2.1   | 1.47 |
| ENSMUSG00000029028 | <i>Lrrc47</i>       | 3.61 | 4.3  | 3.79  | 3.62 |
| ENSMUSG00000029029 | <i>DD57</i>         | 2.27 | 3.12 | 1.92  | 2.4  |
| ENSMUSG00000029030 | <i>I200015A19Ri</i> | 5.25 | 5.59 | 5.27  | 4.97 |
| ENSMUSG00000029033 | <i>Centb5</i>       | 0.6  | 1.27 | 1.04  | 0.86 |
| ENSMUSG00000029034 | <i>Cpsf3l</i>       | 3.44 | 3.65 | 3.61  | 3.54 |
| ENSMUSG00000029036 | <i>AK154077</i>     | 3.61 | 4.4  | 4.21  | 3.87 |
| ENSMUSG00000029038 | <i>Ssu72</i>        | 4.67 | 4.66 | 4.68  | 4.59 |
| ENSMUSG00000029047 | <i>Pex10</i>        | 2.11 | 2.46 | 2.3   | 1.82 |

|                    |                     |      |      |      |       |
|--------------------|---------------------|------|------|------|-------|
| ENSMUSG00000029048 | <i>Rer1</i>         | 6.72 | 6.59 | 7    | 7.06  |
| ENSMUSG00000029050 | <i>Ski</i>          | 3.22 | 3.9  | 3.8  | 3.69  |
| ENSMUSG00000029053 | <i>Prkcz</i>        | 1.04 | 0.69 | 1.42 | 1.42  |
| ENSMUSG00000029056 | <i>Pank4</i>        | 2.22 | 2.15 | 2.45 | 1.73  |
| ENSMUSG00000029059 | <i>2810405K02Ri</i> | 4.34 | 5.07 | 4.8  | 4.64  |
| ENSMUSG00000029060 | <i>Mib2</i>         | 2.11 | 2.97 | 2.65 | 2.47  |
| ENSMUSG00000029062 | <i>Cdc21l</i>       | 3.78 | 4.05 | 3.86 | 3.5   |
| ENSMUSG00000029063 | <i>Nadk</i>         | 7.19 | 7.07 | 6.9  | 6.81  |
| ENSMUSG00000029064 | <i>Gnb1</i>         | 5.42 | 5.36 | 5.24 | 5.01  |
| ENSMUSG00000029066 | <i>Mrpl20</i>       | 5.65 | 5.61 | 6.11 | 5.9   |
| ENSMUSG00000029068 | <i>Ccnl2</i>        | 4.5  | 4.44 | 4.34 | 4.01  |
| ENSMUSG00000029070 | <i>Mxra8</i>        | 1.68 | 2.03 | 1.79 | 1.61  |
| ENSMUSG00000029071 | <i>Dvl1</i>         | 4.31 | 4.92 | 4.74 | 4.53  |
| ENSMUSG00000029073 | <i>BC002216</i>     | 3.86 | 4.3  | 3.92 | 3.91  |
| ENSMUSG00000029076 | <i>Sdf4</i>         | 6.14 | 6.36 | 6.23 | 5.96  |
| ENSMUSG00000029084 | <i>Cd38</i>         | 3.67 | 2.85 | 3.12 | 2.65  |
| ENSMUSG00000029086 | <i>Prom1</i>        | 2.48 | 0.48 | 0.95 | -1.41 |
| ENSMUSG00000029089 | <i>4933428G09Ri</i> | 2.05 | 1.49 | 1.29 | 1.2   |
| ENSMUSG00000029090 | <i>NA</i>           | 3.98 | 4.03 | 3.93 | 3.61  |
| ENSMUSG00000029098 | <i>Acox3</i>        | 2.95 | 3.09 | 3.01 | 2.86  |
| ENSMUSG00000029101 | <i>Rgs12</i>        | 0.62 | 0.49 | 1.45 | 1.02  |
| ENSMUSG00000029102 | <i>Hgfac</i>        | 7.15 | 7.61 | 7.47 | 7.32  |
| ENSMUSG00000029103 | <i>Lrpap1</i>       | 4.96 | 5.22 | 4.89 | 4.75  |
| ENSMUSG00000029104 | <i>Hdh</i>          | 1.74 | 1.81 | 1.66 | 1.2   |
| ENSMUSG00000029106 | <i>Add1</i>         | 3.57 | 4.06 | 3.78 | 3.56  |
| ENSMUSG00000029110 | <i>Rnf4</i>         | 5.65 | 5.41 | 5.42 | 5.23  |
| ENSMUSG00000029111 | <i>Whsc2</i>        | 2.26 | 2.43 | 2.16 | 2.26  |
| ENSMUSG00000029119 | <i>Man2b2</i>       | 4.94 | 5.65 | 5.25 | 5.14  |
| ENSMUSG00000029122 | <i>Evc</i>          | 1.59 | 2.1  | 1.75 | 1.41  |
| ENSMUSG00000029125 | <i>Stx18</i>        | 3.13 | 2.89 | 2.86 | 2.77  |
| ENSMUSG00000029128 | <i>Rab28</i>        | 3.7  | 3.27 | 3.47 | 2.78  |



|                    |                     |      |      |      |      |
|--------------------|---------------------|------|------|------|------|
| ENSMUSG00000029131 | <i>Dnajb6</i>       | 0.76 | 1.24 | 1.64 | 1.47 |
| ENSMUSG00000029135 | <i>Fosl2</i>        | 0.13 | 1.43 | 1.17 | 1.05 |
| ENSMUSG00000029136 | <i>Rbks</i>         | 3.87 | 3.38 | 3.7  | 3.52 |
| ENSMUSG00000029141 | <i>Slc4a1ap</i>     | 2.74 | 2.76 | 2.95 | 2.62 |
| ENSMUSG00000029142 | <i>Mrpl33</i>       | 4.99 | 5.53 | 5.45 | 5.28 |
| ENSMUSG00000029144 | <i>Mpv17</i>        | 4.23 | 4.2  | 4.28 | 4.05 |
| ENSMUSG00000029145 | <i>Eif2b4</i>       | 3.84 | 4.62 | 4.37 | 4.28 |
| ENSMUSG00000029146 | <i>Snx17</i>        | 3.56 | 3.49 | 3.2  | 3.54 |
| ENSMUSG00000029147 | <i>Ppmlg</i>        | 4.91 | 5.39 | 5.09 | 5.03 |
| ENSMUSG00000029148 | <i>Nrbp1</i>        | 4.93 | 5.24 | 5.06 | 4.76 |
| ENSMUSG00000029152 | <i>Ociad1</i>       | 6.93 | 6.23 | 6.51 | 6.05 |
| ENSMUSG00000029153 | <i>Ociad2</i>       | 4.05 | 3.7  | 3.55 | 3.66 |
| ENSMUSG00000029162 | <i>Khk</i>          | 8.06 | 8.2  | 8.48 | 8.07 |
| ENSMUSG00000029163 | <i>Emilin1</i>      | 2.09 | 2.99 | 2.05 | 2.2  |
| ENSMUSG00000029165 | <i>Agbl5</i>        | 1.42 | 0.94 | 1.21 | 1.63 |
| ENSMUSG00000029166 | <i>Mapre3</i>       | 4.06 | 4.11 | 4.49 | 4.4  |
| ENSMUSG00000029167 | <i>Ppargc1a</i>     | 2.06 | 1.53 | 2.61 | 2.41 |
| ENSMUSG00000029169 | <i>Dhx15</i>        | 5.05 | 4.72 | 4.95 | 4.64 |
| ENSMUSG00000029171 | <i>Pgm1</i>         | 2.08 | 1.64 | 2.11 | 1.88 |
| ENSMUSG00000029173 | <i>Sepsecs</i>      | 5.08 | 4.32 | 4.66 | 4.07 |
| ENSMUSG00000029175 | <i>4930471M23R</i>  | 3.78 | 4.04 | 3.93 | 3.82 |
| ENSMUSG00000029176 | <i>Anapc4</i>       | 2.38 | 1.92 | 2.02 | 1.5  |
| ENSMUSG00000029177 | <i>Cenpa</i>        | 1.14 | 1.22 | 1.59 | 0.66 |
| ENSMUSG00000029178 | <i>Klf3</i>         | 4.1  | 4.7  | 4.73 | 4.66 |
| ENSMUSG00000029185 | <i>9130005N14Ri</i> | 3.65 | 3.61 | 3.53 | 3.4  |
| ENSMUSG00000029186 | <i>Pi4k2b</i>       | 3.39 | 2.85 | 3.3  | 2.93 |
| ENSMUSG00000029190 | <i>D5Erttd579e</i>  | 3.63 | 3.1  | 2.98 | 2.6  |
| ENSMUSG00000029191 | <i>Rfc1</i>         | 3.08 | 2.49 | 2.94 | 2.57 |
| ENSMUSG00000029192 | <i>kiaa1322</i>     | 3.29 | 3.05 | 3.12 | 2.58 |
| ENSMUSG00000029195 | <i>Klb</i>          | 3.75 | 3.87 | 3.84 | 3.76 |
| ENSMUSG00000029196 | <i>NA</i>           | 3.69 | 3.8  | 3.49 | 3.44 |

|                    |                     |      |       |      |      |
|--------------------|---------------------|------|-------|------|------|
| ENSMUSG00000029198 | <i>Grpel1</i>       | 6.88 | 7.06  | 6.83 | 6.66 |
| ENSMUSG00000029199 | <i>mLIP1</i>        | 5.03 | 4.4   | 4.61 | 4.37 |
| ENSMUSG00000029201 | <i>Ugdh</i>         | 6.43 | 5.72  | 6.07 | 5.34 |
| ENSMUSG00000029202 | <i>Pds5a</i>        | 4.02 | 3.71  | 3.93 | 3.52 |
| ENSMUSG00000029203 | <i>Hip2</i>         | 5.31 | 4.07  | 4.69 | 4.36 |
| ENSMUSG00000029207 | <i>Apbb2</i>        | 1.14 | 0.86  | 1.29 | 1.12 |
| ENSMUSG00000029208 | <i>Guf1</i>         | 2.63 | 1.82  | 2.16 | 1.39 |
| ENSMUSG00000029213 | <i>Commd8</i>       | 4.33 | 2.73  | 3.98 | 3.3  |
| ENSMUSG00000029217 | <i>Tec</i>          | 3.48 | 3.55  | 3.39 | 3.03 |
| ENSMUSG00000029221 | <i>Slc30a9</i>      | 4.71 | 4.04  | 4.77 | 4.13 |
| ENSMUSG00000029227 | <i>Fip1l1</i>       | 3.74 | 3.27  | 3.52 | 3.31 |
| ENSMUSG00000029228 | <i>Lnx1</i>         | 2.04 | -0.13 | 2.53 | 1.52 |
| ENSMUSG00000029229 | <i>Chic2</i>        | 3.58 | 2.61  | 3.47 | 2.91 |
| ENSMUSG00000029231 | <i>Pdgfra</i>       | 1.17 | 0.94  | 1.33 | 0.71 |
| ENSMUSG00000029233 | <i>Srd5a2l</i>      | 2.79 | 3.27  | 2.96 | 2.89 |
| ENSMUSG00000029234 | <i>Tmem165</i>      | 3.05 | 1.97  | 2.58 | 1.52 |
| ENSMUSG00000029238 | <i>Clock</i>        | 3.99 | 3.15  | 3.34 | 2.73 |
| ENSMUSG00000029246 | <i>NA</i>           | 3.56 | 2.56  | 3.67 | 3.28 |
| ENSMUSG00000029247 | <i>Paics</i>        | 7.17 | 6.27  | 7.11 | 6.6  |
| ENSMUSG00000029249 | <i>Rest</i>         | 2.31 | 1.52  | 2.16 | 1.61 |
| ENSMUSG00000029250 | <i>Polr2b</i>       | 4.33 | 3.92  | 4.28 | 4.02 |
| ENSMUSG00000029254 | <i>stap-1</i>       | 1.9  | -3.39 | 2.24 | 0.35 |
| ENSMUSG00000029260 | <i>Ugt2b34</i>      | 7.48 | 7.04  | 6.92 | 6.62 |
| ENSMUSG00000029263 | <i>Pigg</i>         | 2.51 | 2.06  | 2.7  | 2.16 |
| ENSMUSG00000029265 | <i>Dr1</i>          | 3.94 | 3.21  | 3.56 | 3.23 |
| ENSMUSG00000029267 | <i>Mtf2</i>         | 1.82 | 0.55  | 1.08 | 0.43 |
| ENSMUSG00000029269 | <i>Sult1b1</i>      | 4.89 | 3.53  | 4.27 | 3.58 |
| ENSMUSG00000029270 | <i>2900024C23Ri</i> | 3.3  | 2.63  | 2.89 | 2.33 |
| ENSMUSG00000029272 | <i>Sult1e1</i>      | 2.67 | -2.05 | 4.02 | 0.17 |
| ENSMUSG00000029273 | <i>Sult1d1</i>      | 7.9  | 5.85  | 7.61 | 6.52 |
| ENSMUSG00000029276 | <i>Glmn</i>         | 1.54 | 0.55  | 1.12 | 0.39 |

|                    |                    |       |       |       |       |
|--------------------|--------------------|-------|-------|-------|-------|
| ENSMUSG00000029287 | <i>Tgfb3</i>       | 1.71  | 1.49  | 2     | 1.87  |
| ENSMUSG00000029290 | <i>Zfp326</i>      | 2.85  | 2.22  | 2.37  | 1.9   |
| ENSMUSG00000029291 | <i>Rufy3</i>       | 2.73  | 2.98  | 3.28  | 2.8   |
| ENSMUSG00000029304 | <i>Spp1</i>        | 4.11  | 4.02  | 3.75  | 3.88  |
| ENSMUSG00000029309 | <i>Sparcl1</i>     | 1.86  | -1.03 | 2.02  | 0.95  |
| ENSMUSG00000029310 | <i>Nudt9</i>       | 4.78  | 5.02  | 4.6   | 4.59  |
| ENSMUSG00000029311 | <i>Hsd17b11</i>    | 6.32  | 6.27  | 6.16  | 6.08  |
| ENSMUSG00000029313 | <i>Aff1</i>        | 3.28  | 2.81  | 2.99  | 2.62  |
| ENSMUSG00000029314 | <i>A230097K15R</i> | 4.55  | 4.05  | 4.4   | 3.59  |
| ENSMUSG00000029319 | <i>Coq2</i>        | 3.49  | 3.36  | 3.52  | 2.98  |
| ENSMUSG00000029322 | <i>Plac8</i>       | 1.83  | 1.58  | 2.16  | 2.12  |
| ENSMUSG00000029326 | <i>Enoph1</i>      | 1.37  | 1.78  | 1.85  | 1.4   |
| ENSMUSG00000029328 | <i>Hnrpd1</i>      | 3.38  | 3.17  | 3.8   | 3.13  |
| ENSMUSG00000029333 | <i>Rasgef1b</i>    | 4.01  | 3.72  | 4.38  | 4.74  |
| ENSMUSG00000029338 | <i>Antxr2</i>      | 3.22  | 2.8   | 3.07  | 2.49  |
| ENSMUSG00000029344 | <i>Tpst2</i>       | 4.57  | 5.16  | 4.6   | 4.45  |
| ENSMUSG00000029345 | <i>Tfip11</i>      | 3.23  | 3.91  | 3.6   | 3.5   |
| ENSMUSG00000029346 | <i>2810002G02R</i> | 3.56  | 3.71  | 3.63  | 3.7   |
| ENSMUSG00000029360 | <i>NA</i>          | 2.76  | 3.23  | 2.9   | 2.79  |
| ENSMUSG00000029363 | <i>Rfc5</i>        | 1.01  | 1.29  | 1.13  | 1.11  |
| ENSMUSG00000029364 | <i>Wsb2</i>        | 3.88  | 4.51  | 3.89  | 3.77  |
| ENSMUSG00000029366 | <i>Dck</i>         | 1.57  | 0.35  | 1.86  | 1.13  |
| ENSMUSG00000029368 | <i>Alb</i>         | 15.02 | 15.24 | 15.06 | 15.19 |
| ENSMUSG00000029369 | <i>Afm</i>         | 8.48  | 7.77  | 8.03  | 7.94  |
| ENSMUSG00000029370 | <i>Rassf6</i>      | 2.79  | 2.54  | 3.07  | 2.32  |
| ENSMUSG00000029372 | <i>Ppbp</i>        | -3.43 | -2.85 | 1.35  | -3.43 |
| ENSMUSG00000029380 | <i>Cxcl1</i>       | -0.39 | 2     | 1.58  | 2.04  |
| ENSMUSG00000029385 | <i>Ccng2</i>       | 4.18  | 2.55  | 3.32  | 1.6   |
| ENSMUSG00000029386 | <i>Tctn2</i>       | 0.96  | 1.37  | 1.08  | 0.97  |
| ENSMUSG00000029387 | <i>Gtf2h3</i>      | 3.21  | 3.19  | 3.38  | 3.23  |
| ENSMUSG00000029388 | <i>Eif2b1</i>      | 4.26  | 4.65  | 4.47  | 4.33  |

|                    |                     |       |       |       |      |
|--------------------|---------------------|-------|-------|-------|------|
| ENSMUSG00000029389 | <i>Ddx55</i>        | 1.39  | 1.45  | 1.4   | 1.23 |
| ENSMUSG00000029390 | <i>Tmed2</i>        | 3.51  | 2.85  | 3.33  | 3.07 |
| ENSMUSG00000029397 | <i>Rchyl</i>        | 4.67  | 4.71  | 4.6   | 4.22 |
| ENSMUSG00000029401 | <i>BC003324</i>     | 2.04  | 3.02  | 2.95  | 2.64 |
| ENSMUSG00000029402 | <i>6330548G22R1</i> | 1.76  | 2.4   | 1.99  | 2.03 |
| ENSMUSG00000029403 | <i>Cdkl2</i>        | 1.48  | 0.77  | 1.3   | 0.54 |
| ENSMUSG00000029404 | <i>Arl6ip4</i>      | 4.04  | 4.74  | 4.35  | 4.02 |
| ENSMUSG00000029405 | <i>G3bp2</i>        | 4.37  | 3.98  | 4.33  | 3.87 |
| ENSMUSG00000029406 | <i>Pitpnm2</i>      | 3.37  | 3.84  | 3.55  | 3.49 |
| ENSMUSG00000029407 | <i>Uso1</i>         | 5.41  | 5.21  | 4.92  | 4.62 |
| ENSMUSG00000029415 | <i>Sdad1</i>        | 2.14  | 1.99  | 1.85  | 1.64 |
| ENSMUSG00000029416 | <i>Slc15a4</i>      | 3.8   | 4.33  | 4.67  | 4.54 |
| ENSMUSG00000029417 | <i>Cxcl9</i>        | 3.86  | 2.42  | 3.06  | 3.21 |
| ENSMUSG00000029422 | <i>Rsrc2</i>        | 2.97  | 1.93  | 2.66  | 2.02 |
| ENSMUSG00000029426 | <i>Scarb2</i>       | 5.58  | 5.85  | 5.45  | 5.64 |
| ENSMUSG00000029427 | <i>Zcchc8</i>       | 3.17  | 2.9   | 3.18  | 2.66 |
| ENSMUSG00000029428 | <i>Stx2</i>         | 3.37  | 3.37  | 3.33  | 3.04 |
| ENSMUSG00000029430 | <i>Ran</i>          | 3.78  | 3.77  | 3.85  | 4.27 |
| ENSMUSG00000029432 | <i>Gbas</i>         | 2.15  | 2.13  | 2.29  | 2.11 |
| ENSMUSG00000029433 | <i>Diablo</i>       | 3.89  | 4.32  | 3.89  | 3.57 |
| ENSMUSG00000029434 | <i>Vps33a</i>       | 3.79  | 3.96  | 3.92  | 3.75 |
| ENSMUSG00000029438 | <i>Bcl7a</i>        | 0.85  | 1.39  | 1.1   | 0.79 |
| ENSMUSG00000029439 | <i>Sfrs8</i>        | 1.97  | 2.38  | 2.16  | 2.21 |
| ENSMUSG00000029440 | <i>Psmc9</i>        | 5.46  | 4.98  | 5.66  | 5.4  |
| ENSMUSG00000029445 | <i>Hpd</i>          | 11.36 | 11.16 | 11.52 | 11.1 |
| ENSMUSG00000029446 | <i>Psph</i>         | 1.73  | 2.41  | 1.64  | 1.88 |
| ENSMUSG00000029447 | <i>Cct6a</i>        | 5.85  | 5.77  | 5.64  | 5.72 |
| ENSMUSG00000029454 | <i>Mapkapk5</i>     | 4.28  | 3.91  | 4.17  | 3.99 |
| ENSMUSG00000029455 | <i>Aldh2</i>        | 9.67  | 10.05 | 10.07 | 10   |
| ENSMUSG00000029456 | <i>Acad10</i>       | 4.63  | 4.35  | 4.72  | 4.04 |
| ENSMUSG00000029458 | <i>Brap</i>         | 5.73  | 5.55  | 6.26  | 5.93 |

|                    |                     |      |      |      |      |
|--------------------|---------------------|------|------|------|------|
| ENSMUSG00000029461 | <i>B930006L02Ri</i> | 3.67 | 3.25 | 3.51 | 3.44 |
| ENSMUSG00000029462 | <i>Vps29</i>        | 5.29 | 4.42 | 4.99 | 4.53 |
| ENSMUSG00000029463 | <i>1500011H22Ri</i> | 1.63 | 1.42 | 1.76 | 1.18 |
| ENSMUSG00000029464 | <i>Atpbd1c</i>      | 2.82 | 3.31 | 3.1  | 3.04 |
| ENSMUSG00000029465 | <i>Arpc3</i>        | 5.41 | 5.55 | 5.74 | 5.45 |
| ENSMUSG00000029466 | <i>Anapc7</i>       | 2.16 | 2.65 | 2.56 | 2.27 |
| ENSMUSG00000029467 | <i>Atp2a2</i>       | 5.84 | 6.24 | 5.52 | 5.43 |
| ENSMUSG00000029469 | <i>Cdv1R</i>        | 1.04 | 0.97 | 1.37 | 0.76 |
| ENSMUSG00000029470 | <i>P2rx4</i>        | 3.73 | 4.01 | 3.79 | 3.56 |
| ENSMUSG00000029471 | <i>Camkk2</i>       | 1.34 | 2.01 | 1.48 | 1.58 |
| ENSMUSG00000029472 | <i>Anapc5</i>       | 5.18 | 4.99 | 4.89 | 4.71 |
| ENSMUSG00000029474 | <i>Rnf34</i>        | 2.69 | 2.76 | 2.68 | 2.37 |
| ENSMUSG00000029475 | <i>Fbxl10</i>       | 2.5  | 2.91 | 2.21 | 2.41 |
| ENSMUSG00000029478 | <i>Smrte</i>        | 2.01 | 3.09 | 3.18 | 2.82 |
| ENSMUSG00000029480 | <i>Dhx37</i>        | 2.15 | 2.75 | 2.3  | 2.12 |
| ENSMUSG00000029482 | <i>Aacs</i>         | 4.66 | 3.73 | 4.71 | 4.84 |
| ENSMUSG00000029486 | <i>Mrpl1</i>        | 3.79 | 2.76 | 3.33 | 2.56 |
| ENSMUSG00000029499 | <i>Pxmp2</i>        | 6.79 | 6.46 | 6.92 | 6.26 |
| ENSMUSG00000029500 | <i>Pgam5</i>        | 3.7  | 3.93 | 3.78 | 3.55 |
| ENSMUSG00000029501 | <i>D5Ert585e</i>    | 3.53 | 2.84 | 3.54 | 3.14 |
| ENSMUSG00000029502 | <i>Golga3</i>       | 2.59 | 2.79 | 2.46 | 2.38 |
| ENSMUSG00000029504 | <i>Ddx51</i>        | 2.13 | 2.85 | 2.42 | 2.63 |
| ENSMUSG00000029505 | <i>Ep400</i>        | 2.31 | 2.75 | 2.45 | 2.41 |
| ENSMUSG00000029507 | <i>Pus1</i>         | 2.81 | 3.42 | 3.46 | 3.09 |
| ENSMUSG00000029512 | <i>Ulk1</i>         | 5.59 | 5.19 | 5.62 | 5.22 |
| ENSMUSG00000029513 | <i>Prkab1</i>       | 3.6  | 4.32 | 3.87 | 3.71 |
| ENSMUSG00000029518 | <i>Rab35</i>        | 3.88 | 4.21 | 3.89 | 3.82 |
| ENSMUSG00000029524 | <i>NA</i>           | 2.26 | 2.35 | 2.71 | 2.53 |
| ENSMUSG00000029528 | <i>Pxn</i>          | 4.01 | 4.37 | 3.99 | 3.8  |
| ENSMUSG00000029534 | <i>St7</i>          | 3.1  | 3.31 | 2.78 | 2.87 |
| ENSMUSG00000029535 | <i>Triap1</i>       | 4.26 | 4.25 | 4.09 | 4.22 |

|                    |                    |      |      |      |      |
|--------------------|--------------------|------|------|------|------|
| ENSMUSG00000029536 | <i>2010003O18R</i> | 4.5  | 4.42 | 4.64 | 3.99 |
| ENSMUSG00000029538 | <i>Sfrs9</i>       | 3.78 | 3.86 | 3.75 | 3.5  |
| ENSMUSG00000029545 | <i>Acads</i>       | 7.13 | 7.35 | 7.19 | 6.82 |
| ENSMUSG00000029547 | <i>Ints1</i>       | 2.21 | 3.3  | 2.56 | 2.31 |
| ENSMUSG00000029550 | <i>Sppl3</i>       | 3.37 | 3.34 | 3.39 | 2.96 |
| ENSMUSG00000029551 | <i>Psmg3</i>       | 3.64 | 4.13 | 4.27 | 4.07 |
| ENSMUSG00000029554 | <i>Mad1</i>        | 1.86 | 2.33 | 2.87 | 2.71 |
| ENSMUSG00000029556 | <i>Hnfla</i>       | 3.45 | 4.21 | 4.42 | 4.18 |
| ENSMUSG00000029557 | <i>Ftsj2</i>       | 2.57 | 3.25 | 2.88 | 2.59 |
| ENSMUSG00000029559 | <i>2210016L21R</i> | 2.61 | 3.06 | 3.27 | 3.08 |
| ENSMUSG00000029560 | <i>Snx8</i>        | 2.42 | 3.34 | 3.19 | 3    |
| ENSMUSG00000029561 | <i>Oasl2</i>       | 1.71 | 1.71 | 1.12 | 2.06 |
| ENSMUSG00000029569 | <i>Tmem168</i>     | 3.34 | 2.36 | 2.74 | 2.29 |
| ENSMUSG00000029571 | <i>Tmem106b</i>    | 6.65 | 5.77 | 6.44 | 5.91 |
| ENSMUSG00000029575 | <i>Mmab</i>        | 3.07 | 2.73 | 2.43 | 2.19 |
| ENSMUSG00000029577 | <i>Ube3b</i>       | 4.77 | 5.03 | 4.77 | 4.35 |
| ENSMUSG00000029578 | <i>Wipi2</i>       | 4.98 | 5.32 | 4.81 | 4.72 |
| ENSMUSG00000029580 | <i>Actb</i>        | 7.47 | 7.91 | 7.72 | 7.52 |
| ENSMUSG00000029587 | <i>Zfp12</i>       | 1.73 | 1.89 | 1.72 | 1.5  |
| ENSMUSG00000029591 | <i>Ung</i>         | 0.47 | 0.99 | 1.43 | 1.51 |
| ENSMUSG00000029592 | <i>Usp30</i>       | 2.87 | 3.53 | 3.35 | 3.27 |
| ENSMUSG00000029594 | <i>Rbm19</i>       | 1.75 | 2.56 | 2.47 | 1.99 |
| ENSMUSG00000029596 | <i>Sdsl</i>        | 2.34 | 3.53 | 3.29 | 2.97 |
| ENSMUSG00000029597 | <i>Sds</i>         | 7.54 | 7.78 | 8.28 | 7.57 |
| ENSMUSG00000029598 | <i>1300012G16R</i> | 5.08 | 6.17 | 5.76 | 5.71 |
| ENSMUSG00000029599 | <i>Ddx54</i>       | 3.63 | 4.88 | 4.26 | 4.11 |
| ENSMUSG00000029600 | <i>1110008J03R</i> | 0.78 | 1.79 | 1.2  | 1.13 |
| ENSMUSG00000029607 | <i>4921520G13R</i> | 1.27 | 1.37 | 1.49 | 1.23 |
| ENSMUSG00000029610 | <i>Jtv1</i>        | 3.44 | 3.75 | 3.69 | 4.06 |
| ENSMUSG00000029613 | <i>mKIAA1369</i>   | 4.8  | 4.66 | 5.02 | 4.68 |
| ENSMUSG00000029614 | <i>Rpl6</i>        | 3.71 | 4.53 | 4.21 | 3.55 |

|                    |                  |      |      |      |      |
|--------------------|------------------|------|------|------|------|
| ENSMUSG00000029616 | <i>Erp29</i>     | 4.84 | 5.71 | 5.01 | 4.91 |
| ENSMUSG00000029617 | <i>AU022870</i>  | 4.98 | 4.19 | 4.42 | 3.97 |
| ENSMUSG00000029621 | <i>Arpc1a</i>    | 5.26 | 5.18 | 5.06 | 4.92 |
| ENSMUSG00000029622 | <i>Arpc1b</i>    | 4.07 | 3.84 | 3.72 | 3.59 |
| ENSMUSG00000029623 | <i>Pdap1</i>     | 5.7  | 4.87 | 4.95 | 4.98 |
| ENSMUSG00000029624 | <i>Ptcd1</i>     | 2.95 | 2.94 | 3.51 | 3.4  |
| ENSMUSG00000029625 | <i>Cpsf4</i>     | 3.5  | 3.95 | 4.02 | 4    |
| ENSMUSG00000029627 | <i>Zkscan14</i>  | 2.37 | 1.68 | 2.22 | 2.31 |
| ENSMUSG00000029629 | <i>Phf14</i>     | 2.58 | 2.08 | 2.57 | 2.05 |
| ENSMUSG00000029630 | <i>Cyp3a25</i>   | 7.41 | 6.85 | 7.48 | 6.81 |
| ENSMUSG00000029632 | <i>Ndufa4</i>    | 8.83 | 8.36 | 9.02 | 9.14 |
| ENSMUSG00000029633 | <i>NA</i>        | 3.77 | 3.36 | 3.63 | 3.18 |
| ENSMUSG00000029634 | <i>Rnf6</i>      | 3.83 | 4.23 | 3.9  | 3.79 |
| ENSMUSG00000029635 | <i>Cdk8</i>      | 2.79 | 1.96 | 2.57 | 2.14 |
| ENSMUSG00000029638 | <i>Glcc1</i>     | 1.1  | 0.68 | 1.37 | 1.13 |
| ENSMUSG00000029640 | <i>Usp12</i>     | 3.1  | 2.72 | 2.45 | 2.58 |
| ENSMUSG00000029642 | <i>Rpo1-3</i>    | 4.08 | 3.78 | 4.09 | 4.14 |
| ENSMUSG00000029647 | <i>Pan3</i>      | 2.84 | 2    | 3.11 | 2.39 |
| ENSMUSG00000029648 | <i>Flt1</i>      | 1.38 | 1.19 | 0.77 | 0.9  |
| ENSMUSG00000029649 | <i>Pomp</i>      | 7.54 | 6.42 | 7.36 | 7.08 |
| ENSMUSG00000029650 | <i>Slc46a3</i>   | 3.86 | 3.23 | 3.77 | 3.4  |
| ENSMUSG00000029655 | <i>BC037393</i>  | 2.82 | 1.57 | 2.09 | 1.58 |
| ENSMUSG00000029656 | <i>C8b</i>       | 6.29 | 7.05 | 6.44 | 6.42 |
| ENSMUSG00000029657 | <i>Hsp110</i>    | 5.34 | 5.7  | 5.24 | 5.89 |
| ENSMUSG00000029661 | <i>Colla2</i>    | 1.45 | 1.63 | 1.43 | 1.44 |
| ENSMUSG00000029664 | <i>Tfpi2</i>     | 6.04 | 4.76 | 5.24 | 4.71 |
| ENSMUSG00000029669 | <i>Tspan12</i>   | 6.92 | 6.04 | 6.85 | 6.3  |
| ENSMUSG00000029670 | <i>Ing3</i>      | 1.65 | 1.27 | 1.18 | 1.02 |
| ENSMUSG00000029672 | <i>D6Wsu176e</i> | 3.99 | 3.79 | 3.77 | 3.25 |
| ENSMUSG00000029681 | <i>BCL7B</i>     | 3.4  | 3.73 | 3.34 | 3.34 |
| ENSMUSG00000029684 | <i>Wasl</i>      | 5.2  | 3.99 | 4.84 | 4.37 |

|                    |                     |      |      |      |      |
|--------------------|---------------------|------|------|------|------|
| ENSMUSG00000029686 | <i>Cull1</i>        | 5.25 | 4.71 | 4.83 | 4.25 |
| ENSMUSG00000029687 | <i>Ezh2</i>         | 1.1  | 0.33 | 1.36 | 0.72 |
| ENSMUSG00000029695 | <i>Aass</i>         | 7.66 | 6.92 | 7.56 | 6.77 |
| ENSMUSG00000029701 | <i>Rbm28</i>        | 2.92 | 2.93 | 2.96 | 2.77 |
| ENSMUSG00000029703 | <i>I200011O22Ri</i> | 1.8  | 2.72 | 2.32 | 1.78 |
| ENSMUSG00000029705 | <i>Cutl1</i>        | 1.88 | 2.35 | 2.45 | 2.18 |
| ENSMUSG00000029708 | <i>Gcc1</i>         | 2.15 | 2.12 | 2.09 | 2.06 |
| ENSMUSG00000029710 | <i>Ephb4</i>        | 3.47 | 4.38 | 3.6  | 3.66 |
| ENSMUSG00000029713 | <i>Gnb2</i>         | 5.41 | 6.15 | 5.56 | 5.5  |
| ENSMUSG00000029714 | <i>mKIAA4110</i>    | 2.09 | 2.5  | 2.41 | 1.93 |
| ENSMUSG00000029715 | <i>Pop7</i>         | 2.09 | 2.73 | 2.51 | 2.6  |
| ENSMUSG00000029716 | <i>Trfr2</i>        | 7.24 | 7.92 | 7.51 | 7.38 |
| ENSMUSG00000029718 | <i>Pcolce</i>       | 2.28 | 2.24 | 2.18 | 2.38 |
| ENSMUSG00000029720 | <i>Lrch4</i>        | 2.53 | 3.33 | 3.06 | 2.7  |
| ENSMUSG00000029722 | <i>Hrbl</i>         | 4.7  | 5.03 | 4.66 | 4.35 |
| ENSMUSG00000029723 | <i>Tsc22d4</i>      | 0.94 | 1.23 | 1.5  | 0.89 |
| ENSMUSG00000029725 | <i>2010007H12Ri</i> | 2.59 | 3.87 | 3.87 | 3.64 |
| ENSMUSG00000029726 | <i>Mepce</i>        | 3.82 | 4.21 | 4.15 | 4.03 |
| ENSMUSG00000029727 | <i>Cyp3a13</i>      | 7.49 | 7.21 | 7.27 | 6.84 |
| ENSMUSG00000029729 | <i>Zkscan1</i>      | 3.47 | 2.89 | 3.33 | 2.98 |
| ENSMUSG00000029730 | <i>Mcm7</i>         | 1.62 | 1.23 | 1.82 | 1.71 |
| ENSMUSG00000029735 | <i>Tpk1</i>         | 3.52 | 3.19 | 3.23 | 2.82 |
| ENSMUSG00000029759 | <i>Pon3</i>         | 6.49 | 5.78 | 5.97 | 5.68 |
| ENSMUSG00000029761 | <i>Cald1</i>        | 6.93 | 6.1  | 6.35 | 5.97 |
| ENSMUSG00000029763 | <i>Exoc4</i>        | 2.03 | 1.93 | 1.84 | 1.95 |
| ENSMUSG00000029767 | <i>Calu</i>         | 6.06 | 5.37 | 5.45 | 5.05 |
| ENSMUSG00000029771 | <i>Irf5</i>         | 2.29 | 3.29 | 2.47 | 2.5  |
| ENSMUSG00000029772 | <i>4631427C17Ri</i> | 2.65 | 2.26 | 2.49 | 2.06 |
| ENSMUSG00000029775 | <i>2410127E18Ri</i> | 4.16 | 4.03 | 4.17 | 3.86 |
| ENSMUSG00000029776 | <i>Hibadh</i>       | 8.45 | 7.55 | 8.01 | 7.59 |
| ENSMUSG00000029777 | <i>Gars</i>         | 5.27 | 4.96 | 4.88 | 4.58 |



|                    |                     |      |      |      |      |
|--------------------|---------------------|------|------|------|------|
| ENSMUSG00000029780 | <i>Nt5c3</i>        | 4.87 | 3.54 | 4.55 | 3.76 |
| ENSMUSG00000029781 | <i>Fkbp9</i>        | 4.29 | 4.37 | 3.88 | 3.89 |
| ENSMUSG00000029782 | <i>2700094F01Ri</i> | 2.58 | 2.78 | 2.68 | 2.47 |
| ENSMUSG00000029787 | <i>NA</i>           | 2.92 | 1.77 | 2.7  | 1.97 |
| ENSMUSG00000029798 | <i>NA</i>           | 2.35 | 0.87 | 1.51 | 0.84 |
| ENSMUSG00000029802 | <i>Abcg2</i>        | 4.52 | 3.87 | 4.31 | 3.84 |
| ENSMUSG00000029810 | <i>Tmem176b</i>     | 7.64 | 8.19 | 8    | 7.89 |
| ENSMUSG00000029815 | <i>NA</i>           | 2.51 | 2.39 | 2.7  | 2.26 |
| ENSMUSG00000029817 | <i>Tra2a</i>        | 4.34 | 4    | 3.61 | 3.64 |
| ENSMUSG00000029823 | <i>Luc7l2</i>       | 3.44 | 2.49 | 3.28 | 2.99 |
| ENSMUSG00000029826 | <i>Zc3hav1</i>      | 4.1  | 3.31 | 3.7  | 3.42 |
| ENSMUSG00000029833 | <i>Trim24</i>       | 4.06 | 3.87 | 3.56 | 3.51 |
| ENSMUSG00000029840 | <i>Mtpn</i>         | 5.94 | 5.52 | 5.67 | 5.47 |
| ENSMUSG00000029859 | <i>Ephal</i>        | 3.8  | 4.26 | 4.26 | 3.88 |
| ENSMUSG00000029860 | <i>Zyx</i>          | 4.39 | 5.37 | 4.82 | 4.48 |
| ENSMUSG00000029863 | <i>Casp2</i>        | 1.88 | 1.47 | 1.39 | 0.84 |
| ENSMUSG00000029864 | <i>Gstk1</i>        | 7.64 | 7.47 | 8.13 | 7.57 |
| ENSMUSG00000029910 | <i>Mad2l1</i>       | 2.02 | 0.79 | 1.81 | 1.43 |
| ENSMUSG00000029911 | <i>Ssbp1</i>        | 1.87 | 1.46 | 1.87 | 1.41 |
| ENSMUSG00000029918 | <i>Mrps33</i>       | 1.46 | 0.83 | 1.68 | 1.99 |
| ENSMUSG00000029920 | <i>mKIAA1122</i>    | 2.3  | 1.43 | 1.93 | 1.4  |
| ENSMUSG00000029922 | <i>Mkrn1</i>        | 2.88 | 2.84 | 3.09 | 2.56 |
| ENSMUSG00000029924 | <i>Slc37a3</i>      | 3.46 | 3.42 | 3.34 | 2.94 |
| ENSMUSG00000029992 | <i>Gfpt1</i>        | 2.74 | 2.68 | 2.12 | 1.89 |
| ENSMUSG00000029993 | <i>Nfu1</i>         | 2.82 | 1.89 | 2.74 | 2.43 |
| ENSMUSG00000029994 | <i>Anxa4</i>        | 4.95 | 4.77 | 4.66 | 4.55 |
| ENSMUSG00000029998 | <i>Pcyox1</i>       | 6.23 | 6.07 | 5.98 | 5.77 |
| ENSMUSG00000029999 | <i>Tgfa</i>         | 3.29 | 3.32 | 3.28 | 3.13 |
| ENSMUSG00000030002 | <i>Dusp11</i>       | 4.18 | 3.53 | 3.81 | 3.59 |
| ENSMUSG00000030007 | <i>AK153821</i>     | 6.09 | 6.38 | 6.04 | 6.06 |
| ENSMUSG00000030008 | <i>1700040I03Ri</i> | 2.53 | 2.97 | 3.02 | 2.48 |

|                    |                     |      |      |      |      |
|--------------------|---------------------|------|------|------|------|
| ENSMUSG00000030016 | <i>Zfml</i>         | 3.45 | 2.42 | 3.15 | 2.52 |
| ENSMUSG00000030019 | <i>Fbxl14</i>       | 2.68 | 2.93 | 2.73 | 2.63 |
| ENSMUSG00000030029 | <i>Lrig1</i>        | 3.08 | 3.38 | 3.21 | 3.23 |
| ENSMUSG00000030034 | <i>Znhit4</i>       | 3.39 | 3.95 | 3.72 | 3.66 |
| ENSMUSG00000030035 | <i>Wbp1</i>         | 4.55 | 4.97 | 4.44 | 4.38 |
| ENSMUSG00000030036 | <i>Gcs1</i>         | 4.15 | 5.04 | 4.38 | 4.59 |
| ENSMUSG00000030037 | <i>NA</i>           | 5.11 | 5.12 | 5.26 | 4.78 |
| ENSMUSG00000030042 | <i>Pole4</i>        | 5.37 | 4.67 | 4.85 | 4.34 |
| ENSMUSG00000030045 | <i>Mrpl19</i>       | 2.94 | 3.32 | 2.84 | 2.79 |
| ENSMUSG00000030055 | <i>Rab43</i>        | 5.65 | 5.7  | 5.57 | 5.46 |
| ENSMUSG00000030056 | <i>Isy1</i>         | 3.85 | 3.5  | 3.34 | 2.99 |
| ENSMUSG00000030057 | <i>Cnbp</i>         | 7.63 | 7.15 | 7.39 | 6.97 |
| ENSMUSG00000030058 | <i>Copg</i>         | 4.64 | 4.81 | 4.38 | 4.43 |
| ENSMUSG00000030059 | <i>Tmfl</i>         | 3.75 | 3.25 | 3.07 | 2.86 |
| ENSMUSG00000030060 | <i>8430410A17Ri</i> | 2.1  | 2.37 | 2.28 | 2.28 |
| ENSMUSG00000030061 | <i>Ube1c</i>        | 4.1  | 3.28 | 3.82 | 2.96 |
| ENSMUSG00000030062 | <i>Rpn1</i>         | 6.15 | 6.37 | 5.64 | 5.7  |
| ENSMUSG00000030064 | <i>Frmd4b</i>       | 4.21 | 3.66 | 3.89 | 3.39 |
| ENSMUSG00000030067 | <i>Foxp1</i>        | 2.55 | 2.25 | 2.22 | 1.67 |
| ENSMUSG00000030068 | <i>Eif4e3</i>       | 2.17 | 1.5  | 2    | 1.03 |
| ENSMUSG00000030082 | <i>Sec61a1</i>      | 6.23 | 6.61 | 5.82 | 6.06 |
| ENSMUSG00000030083 | <i>Abtb1</i>        | 3.17 | 4.28 | 3.9  | 3.76 |
| ENSMUSG00000030086 | <i>Chchd6</i>       | 1.99 | 2.52 | 2.55 | 2.55 |
| ENSMUSG00000030087 | <i>Klf15</i>        | 6.39 | 7.07 | 7.03 | 7.03 |
| ENSMUSG00000030088 | <i>Aldh1l1</i>      | 9.2  | 9.33 | 9.47 | 9.01 |
| ENSMUSG00000030091 | <i>Nup210</i>       | 1.18 | 2.17 | 1.39 | 1.37 |
| ENSMUSG00000030094 | <i>Xpc</i>          | 2.84 | 3.26 | 3.12 | 3.15 |
| ENSMUSG00000030095 | <i>Tmem43</i>       | 2.38 | 2.56 | 2.34 | 2.23 |
| ENSMUSG00000030096 | <i>Slc6a6</i>       | 4.29 | 4.41 | 4.39 | 4.31 |
| ENSMUSG00000030101 | <i>Sumf1</i>        | 4.38 | 4.24 | 4.17 | 4.1  |
| ENSMUSG00000030102 | <i>Itpr1</i>        | 3.76 | 3.76 | 3.82 | 3.52 |

|                    |                     |       |      |      |       |
|--------------------|---------------------|-------|------|------|-------|
| ENSMUSG00000030103 | <i>Bhlhb2</i>       | 5.42  | 5.35 | 6.28 | 6.58  |
| ENSMUSG00000030104 | <i>Edem1</i>        | 5.92  | 5.76 | 5.45 | 5.05  |
| ENSMUSG00000030105 | <i>Arl8b</i>        | 5.55  | 5.06 | 5.35 | 4.72  |
| ENSMUSG00000030107 | <i>Usp18</i>        | 3.73  | 2.52 | 2.66 | 3.44  |
| ENSMUSG00000030108 | <i>Slc6a13</i>      | 6.84  | 6.97 | 6.83 | 6.61  |
| ENSMUSG00000030109 | <i>Slc6a12</i>      | 6.03  | 6.07 | 6.1  | 5.62  |
| ENSMUSG00000030113 | <i>NA</i>           | 2.07  | 1.48 | 2.06 | 1.8   |
| ENSMUSG00000030120 | <i>Mlf2</i>         | 6.52  | 7.25 | 6.94 | 6.86  |
| ENSMUSG00000030122 | <i>Ptms</i>         | 8.45  | 9.13 | 8.79 | 8.63  |
| ENSMUSG00000030123 | <i>Plxnd1</i>       | 2.25  | 3.26 | 2.38 | 2.65  |
| ENSMUSG00000030126 | <i>NA</i>           | 3.51  | 3.01 | 3.67 | 3.75  |
| ENSMUSG00000030127 | <i>Cops7a</i>       | 5.35  | 5.55 | 5.52 | 5.15  |
| ENSMUSG00000030131 | <i>Mug2</i>         | 1.26  | 1.92 | 1.47 | 1.48  |
| ENSMUSG00000030137 | <i>Tuba8</i>        | -1.19 | 0.18 | 1.16 | -0.04 |
| ENSMUSG00000030138 | <i>Bms1</i>         | 3.06  | 2.99 | 2.91 | 2.74  |
| ENSMUSG00000030157 | <i>Clec2d</i>       | 5.98  | 4.35 | 5.38 | 5     |
| ENSMUSG00000030159 | <i>Clec1b</i>       | 3.4   | 1.93 | 3    | 2.49  |
| ENSMUSG00000030161 | <i>Gabarapl1</i>    | 8.07  | 8.52 | 8.72 | 8.51  |
| ENSMUSG00000030166 | <i>Rad52</i>        | 1.97  | 1.45 | 2.1  | 1.56  |
| ENSMUSG00000030168 | <i>Adipor2</i>      | 7.28  | 6.87 | 6.86 | 6.67  |
| ENSMUSG00000030170 | <i>Wnt5b</i>        | 1.17  | 1.48 | 1.83 | 1.77  |
| ENSMUSG00000030172 | <i>Erc1</i>         | 2.45  | 2.59 | 2.67 | 2.3   |
| ENSMUSG00000030180 | <i>NA</i>           | 2.18  | 1.56 | 2.03 | 1.75  |
| ENSMUSG00000030188 | <i>2010012C16Ri</i> | 1.34  | 0.56 | 1.11 | 0.77  |
| ENSMUSG00000030189 | <i>Csda</i>         | 4.67  | 4.62 | 4.68 | 4.44  |
| ENSMUSG00000030199 | <i>Etv6</i>         | 2.59  | 2.48 | 2.88 | 2.44  |
| ENSMUSG00000030201 | <i>Lrp6</i>         | 3.86  | 3.31 | 3.51 | 3.13  |
| ENSMUSG00000030203 | <i>Dusp16</i>       | 4.27  | 4.04 | 3.84 | 3.62  |
| ENSMUSG00000030204 | <i>Ddx47</i>        | 4.35  | 4.34 | 4.44 | 4.26  |
| ENSMUSG00000030207 | <i>8430419L09Ri</i> | 3.82  | 3.52 | 4.22 | 3.43  |
| ENSMUSG00000030208 | <i>Emp1</i>         | 1.12  | 1.27 | 0.33 | 0.42  |

|                    |                     |      |       |      |       |
|--------------------|---------------------|------|-------|------|-------|
| ENSMUSG00000030213 | <i>Atf7ip</i>       | 2.46 | 2.75  | 2.9  | 2.36  |
| ENSMUSG00000030214 | <i>I100001H23Ri</i> | 5.39 | 4.99  | 4.92 | 4.74  |
| ENSMUSG00000030216 | <i>Wbp11</i>        | 4.63 | 4.51  | 4.62 | 4.58  |
| ENSMUSG00000030218 | <i>Mgp</i>          | 1.17 | 1.73  | 2    | 2.35  |
| ENSMUSG00000030219 | <i>Erp27</i>        | 0.42 | 0.68  | 1.63 | -0.05 |
| ENSMUSG00000030220 | <i>Arhgdib</i>      | 2.98 | 2.97  | 3.38 | 2.72  |
| ENSMUSG00000030222 | <i>Rerg</i>         | 1.09 | -0.33 | 0.69 | 0.07  |
| ENSMUSG00000030224 | <i>Strap</i>        | 6.02 | 5.06  | 5.46 | 5.2   |
| ENSMUSG00000030225 | <i>Dera</i>         | 6.12 | 5.94  | 5.96 | 5.66  |
| ENSMUSG00000030228 | <i>Pik3c2g</i>      | 3.35 | 2.36  | 3.1  | 2.26  |
| ENSMUSG00000030231 | <i>Plekha5</i>      | 2.53 | 2.7   | 2.79 | 2.39  |
| ENSMUSG00000030232 | <i>Aebp2</i>        | 2.95 | 2.19  | 2.53 | 1.98  |
| ENSMUSG00000030236 | <i>Slco1b2</i>      | 9.16 | 7.9   | 8.86 | 8.22  |
| ENSMUSG00000030237 | <i>Slco1a4</i>      | 6.52 | 5.6   | 6.68 | 5.84  |
| ENSMUSG00000030243 | <i>Recql</i>        | 1.49 | 1.25  | 1.34 | 1.27  |
| ENSMUSG00000030244 | <i>Gys2</i>         | 5.77 | 5.57  | 6.43 | 6.55  |
| ENSMUSG00000030245 | <i>Golt1b</i>       | 1.97 | 1.24  | 1.45 | 1.1   |
| ENSMUSG00000030247 | <i>Kcnj8</i>        | 1.58 | 1.02  | 1.57 | 1.14  |
| ENSMUSG00000030249 | <i>Abcc9</i>        | 2.87 | 2.27  | 2.37 | 2.15  |
| ENSMUSG00000030259 | <i>Rassf8</i>       | 3.47 | 3.21  | 3.04 | 3.02  |
| ENSMUSG00000030264 | <i>Thumpd3</i>      | 3.45 | 3.23  | 3.19 | 2.95  |
| ENSMUSG00000030265 | <i>Kras</i>         | 3.89 | 2.86  | 3.24 | 2.63  |
| ENSMUSG00000030269 | <i>I110061O04Ri</i> | 3.81 | 4.06  | 3.98 | 3.58  |
| ENSMUSG00000030271 | <i>Ogg1</i>         | 0.74 | 1.8   | 1.74 | 1.8   |
| ENSMUSG00000030272 | <i>Camk1</i>        | 3.3  | 3.59  | 3.26 | 3.21  |
| ENSMUSG00000030275 | <i>NA</i>           | 4.24 | 4.04  | 4.14 | 3.74  |
| ENSMUSG00000030281 | <i>Il17rc</i>       | 4.3  | 4.91  | 4.43 | 4.06  |
| ENSMUSG00000030282 | <i>Cmas</i>         | 5.29 | 4.6   | 4.71 | 4.42  |
| ENSMUSG00000030284 | <i>Creld1</i>       | 4.54 | 5.18  | 4.92 | 4.71  |
| ENSMUSG00000030286 | <i>Tmem111</i>      | 5.46 | 5.32  | 5.23 | 5.09  |
| ENSMUSG00000030287 | <i>Itpr2</i>        | 2.62 | 2.49  | 2.93 | 2.65  |

|                    |                     |        |       |       |       |
|--------------------|---------------------|--------|-------|-------|-------|
| ENSMUSG00000030291 | <i>Med21</i>        | 3.68   | 3.39  | 3.71  | 3.33  |
| ENSMUSG00000030298 | <i>Sec13</i>        | 5.01   | 5.53  | 5.11  | 5.07  |
| ENSMUSG00000030301 | <i>Ccdc91</i>       | 3.74   | 3.75  | 3.82  | 3.74  |
| ENSMUSG00000030303 | <i>Mlst1</i>        | 2.62   | 1.84  | 2.1   | 1.72  |
| ENSMUSG00000030304 | <i>Ergic2</i>       | 4.63   | 4.12  | 4.39  | 3.96  |
| ENSMUSG00000030313 | <i>D030011O10R</i>  | 4.82   | 4.02  | 4.6   | 4.15  |
| ENSMUSG00000030314 | <i>Atg7</i>         | 4.08   | 4.29  | 3.99  | 3.86  |
| ENSMUSG00000030315 | <i>Vgll4</i>        | 3.31   | 3.12  | 3.27  | 3.53  |
| ENSMUSG00000030327 | <i>Necap1</i>       | 5      | 4.28  | 4.81  | 4.46  |
| ENSMUSG00000030330 | <i>Ing4</i>         | 4.31   | 3.92  | 4.1   | 3.6   |
| ENSMUSG00000030335 | <i>bMRP64</i>       | 4.84   | 4.34  | 4.8   | 4.72  |
| ENSMUSG00000030339 | <i>Ltbr</i>         | 5.51   | 6.32  | 6     | 5.82  |
| ENSMUSG00000030340 | <i>Scnn1a</i>       | 3.37   | 3.66  | 4.07  | 3.95  |
| ENSMUSG00000030341 | <i>Tnfrsf1a</i>     | 5.94   | 6.18  | 6.02  | 6     |
| ENSMUSG00000030342 | <i>Cd9</i>          | 4      | 4.57  | 3.88  | 4.4   |
| ENSMUSG00000030347 | <i>D6Wsu163e</i>    | 2.52   | 2.42  | 2.55  | 2.44  |
| ENSMUSG00000030352 | <i>Tspan9</i>       | 3.78   | 4.04  | 3.64  | 3.68  |
| ENSMUSG00000030357 | <i>Fkbp4</i>        | 6.86   | 7.04  | 6.66  | 6.68  |
| ENSMUSG00000030359 | <i>Pzp</i>          | 10.14  | 10.31 | 10.14 | 10.19 |
| ENSMUSG00000030374 | <i>Strn4</i>        | 3.64   | 4.27  | 4.03  | 3.72  |
| ENSMUSG00000030378 | <i>2810007J24Ri</i> | 8.88   | 7.21  | 8.06  | 7.16  |
| ENSMUSG00000030382 | <i>Slc27a5</i>      | 9      | 9.16  | 9.06  | 8.95  |
| ENSMUSG00000030397 | <i>mKIAA1860</i>    | 2.22   | 2.43  | 2.51  | 2.19  |
| ENSMUSG00000030399 | <i>Ckm</i>          | #NAME? | -2.82 | 3.08  | 3.3   |
| ENSMUSG00000030400 | <i>Ercc2</i>        | 1.79   | 1.91  | 1.85  | 1.34  |
| ENSMUSG00000030403 | <i>Vasp</i>         | 2.97   | 2.93  | 2.99  | 2.67  |
| ENSMUSG00000030407 | <i>Qpctl</i>        | 2.97   | 3.09  | 3.21  | 2.82  |
| ENSMUSG00000030409 | <i>Dmpk</i>         | 2.28   | 2.65  | 2.72  | 2.37  |
| ENSMUSG00000030410 | <i>Dmwd</i>         | 3.02   | 3.71  | 3.41  | 3.32  |
| ENSMUSG00000030417 | <i>Pdcd5</i>        | 1.58   | 2.02  | 2.31  | 2.02  |
| ENSMUSG00000030421 | <i>C80913</i>       | 4.04   | 3.31  | 3.89  | 3.5   |

|                    |                     |      |      |      |      |
|--------------------|---------------------|------|------|------|------|
| ENSMUSG00000030423 | <i>Pop4</i>         | 3.89 | 3.71 | 3.48 | 3.55 |
| ENSMUSG00000030424 | <i>NA</i>           | 1.44 | 0.07 | 1    | 0.47 |
| ENSMUSG00000030431 | <i>2210411K11Ri</i> | 2.38 | 4.23 | 3.39 | 3.07 |
| ENSMUSG00000030432 | <i>Rpl28</i>        | 0.75 | 1.71 | 1.71 | 1.42 |
| ENSMUSG00000030435 | <i>U2af2</i>        | 2.46 | 3.2  | 3    | 2.88 |
| ENSMUSG00000030447 | <i>Cyfp1</i>        | 3.95 | 3.78 | 3.76 | 3.56 |
| ENSMUSG00000030451 | <i>Herc2</i>        | 2.26 | 2.34 | 2.21 | 1.91 |
| ENSMUSG00000030452 | <i>Nipa2</i>        | 4.05 | 2.81 | 3.72 | 3.17 |
| ENSMUSG00000030465 | <i>Psd3</i>         | 2.8  | 1.62 | 2.62 | 2.1  |
| ENSMUSG00000030469 | <i>NA</i>           | 1.08 | 0.38 | 0.47 | 0.31 |
| ENSMUSG00000030470 | <i>Csrp3</i>        | 4.29 | 5.17 | 4.34 | 3.7  |
| ENSMUSG00000030471 | <i>Zdhc13</i>       | 2.09 | 1.3  | 1.63 | 0.93 |
| ENSMUSG00000030474 | <i>Siglece</i>      | 1.86 | 1.67 | 1.69 | 0.78 |
| ENSMUSG00000030483 | <i>Cyp2b10</i>      | 6.48 | 2.86 | 4.91 | 2.87 |
| ENSMUSG00000030494 | <i>Rhpn2</i>        | 2.83 | 3.48 | 2.95 | 2.53 |
| ENSMUSG00000030498 | <i>Gas2</i>         | 4.38 | 3.33 | 4.23 | 3.33 |
| ENSMUSG00000030499 | <i>Kctd15</i>       | 2.11 | 2.69 | 2.15 | 2    |
| ENSMUSG00000030505 | <i>Prmt3</i>        | 2.46 | 2.9  | 2.12 | 2.28 |
| ENSMUSG00000030509 | <i>Asb7</i>         | 1.89 | 1.39 | 1.74 | 1.37 |
| ENSMUSG00000030512 | <i>Snrpa1</i>       | 3.75 | 3.67 | 3.61 | 3.34 |
| ENSMUSG00000030513 | <i>NA</i>           | 5.23 | 5.68 | 5.09 | 5.28 |
| ENSMUSG00000030515 | <i>Tarsl2</i>       | 2.84 | 2.39 | 2.91 | 2.45 |
| ENSMUSG00000030516 | <i>Tjp1</i>         | 3.35 | 2.7  | 3.36 | 2.84 |
| ENSMUSG00000030521 | <i>Mphosph10</i>    | 3.5  | 3.29 | 2.88 | 2.91 |
| ENSMUSG00000030522 | <i>Mtmr10</i>       | 3.77 | 3.27 | 3.88 | 3.55 |
| ENSMUSG00000030527 | <i>Crtc3</i>        | 1.8  | 2.36 | 2.12 | 2.11 |
| ENSMUSG00000030530 | <i>Furin</i>        | 7.01 | 7.37 | 7.45 | 7.3  |
| ENSMUSG00000030532 | <i>Hddc3</i>        | 3.73 | 3.82 | 3.44 | 3.37 |
| ENSMUSG00000030533 | <i>Unc45a</i>       | 2.04 | 2.8  | 2.65 | 2.4  |
| ENSMUSG00000030534 | <i>Vps33b</i>       | 1.59 | 1.69 | 1.77 | 1.76 |
| ENSMUSG00000030536 | <i>Iqgap1</i>       | 1.36 | 1.04 | 1.16 | 0.81 |

|                    |                     |      |      |      |      |
|--------------------|---------------------|------|------|------|------|
| ENSMUSG00000030538 | <i>Cib1</i>         | 4.68 | 5.2  | 5.35 | 5.23 |
| ENSMUSG00000030539 | <i>Sema4b</i>       | 1.71 | 2.38 | 2.34 | 1.9  |
| ENSMUSG00000030541 | <i>Idh2</i>         | 6.86 | 6.8  | 6.74 | 6.3  |
| ENSMUSG00000030545 | <i>Pex11a</i>       | 6.57 | 6.55 | 6.25 | 5.78 |
| ENSMUSG00000030551 | <i>Nr2f2</i>        | 3.31 | 2.78 | 3.51 | 3.31 |
| ENSMUSG00000030555 | <i>Ttc23</i>        | 4.94 | 4.2  | 5.08 | 4.72 |
| ENSMUSG00000030556 | <i>Lrrc28</i>       | 3.89 | 3.05 | 3.92 | 3.82 |
| ENSMUSG00000030557 | <i>Mef2a</i>        | 3.4  | 2.68 | 3.24 | 2.86 |
| ENSMUSG00000030560 | <i>Ctsc</i>         | 6.53 | 6    | 5.66 | 5.42 |
| ENSMUSG00000030562 | <i>Kox-1</i>        | 2.48 | 2.28 | 1.88 | 2.35 |
| ENSMUSG00000030579 | <i>Tyrobp</i>       | 3.92 | 3.79 | 4.03 | 3.47 |
| ENSMUSG00000030587 | <i>NA</i>           | 2.91 | 3.69 | 3.43 | 3.34 |
| ENSMUSG00000030588 | <i>Yif1b</i>        | 4.39 | 5.23 | 4.96 | 4.86 |
| ENSMUSG00000030590 | <i>I110006G06Ri</i> | 1.12 | 1.86 | 1.49 | 1.51 |
| ENSMUSG00000030591 | <i>Psmc8</i>        | 6.56 | 7.08 | 6.69 | 6.7  |
| ENSMUSG00000030595 | <i>Nfkbib</i>       | 2.9  | 3.74 | 3.6  | 3.37 |
| ENSMUSG00000030602 | <i>Pak4</i>         | 2.47 | 3.37 | 2.76 | 2.45 |
| ENSMUSG00000030603 | <i>Psmc4</i>        | 6.25 | 6.66 | 6.22 | 6.14 |
| ENSMUSG00000030605 | <i>Mfge8</i>        | 2.28 | 2.84 | 3.31 | 2.46 |
| ENSMUSG00000030609 | <i>Isg2011</i>      | 1.77 | 3.02 | 2.07 | 2.28 |
| ENSMUSG00000030610 | <i>Det1</i>         | 1.76 | 2.2  | 1.61 | 1.43 |
| ENSMUSG00000030611 | <i>Mrps11</i>       | 3.54 | 4.15 | 3.94 | 4    |
| ENSMUSG00000030612 | <i>Mrpl46</i>       | 4.04 | 4.46 | 4.37 | 4.24 |
| ENSMUSG00000030613 | <i>Ccdc90b</i>      | 2.94 | 2.24 | 2.87 | 1.88 |
| ENSMUSG00000030614 | <i>Tmem126b</i>     | 4.58 | 3.39 | 4.31 | 3.84 |
| ENSMUSG00000030615 | <i>Tmem126a</i>     | 4.95 | 4.46 | 4.67 | 4.56 |
| ENSMUSG00000030619 | <i>Eed</i>          | 3.61 | 2.41 | 3.34 | 3.08 |
| ENSMUSG00000030623 | <i>NA</i>           | 1.67 | 1.58 | 0.99 | 0.82 |
| ENSMUSG00000030629 | <i>Zfand6</i>       | 6.27 | 5.39 | 5.98 | 5.43 |
| ENSMUSG00000030630 | <i>Fah</i>          | 9.04 | 9.22 | 9.34 | 9.07 |
| ENSMUSG00000030643 | <i>Rab30</i>        | 4.08 | 2.89 | 4.17 | 3.3  |

|                    |                     |       |       |      |      |
|--------------------|---------------------|-------|-------|------|------|
| ENSMUSG00000030647 | <i>Ndufc2</i>       | 5.97  | 5.76  | 5.96 | 5.64 |
| ENSMUSG00000030649 | <i>3200002M19R</i>  | 1     | 1.1   | 1.22 | 0.91 |
| ENSMUSG00000030652 | <i>clk-1</i>        | 3.19  | 3.15  | 3.38 | 3.08 |
| ENSMUSG00000030653 | <i>Pde2a</i>        | 3.6   | 4.23  | 3.62 | 3.57 |
| ENSMUSG00000030654 | <i>Arl6ipl</i>      | 7.11  | 6.11  | 6.94 | 6.37 |
| ENSMUSG00000030655 | <i>2610207I05Ri</i> | 2.92  | 1.93  | 2.47 | 2.13 |
| ENSMUSG00000030659 | <i>Nucb2</i>        | 1.29  | 0.98  | 0.9  | 0.75 |
| ENSMUSG00000030660 | <i>Pik3c2a</i>      | 3.12  | 2.03  | 2.67 | 2.24 |
| ENSMUSG00000030662 | <i>Ranbp5</i>       | 3.77  | 3.57  | 3.85 | 3.56 |
| ENSMUSG00000030663 | <i>1110004F10Ri</i> | 4.19  | 4.1   | 4    | 3.72 |
| ENSMUSG00000030664 | <i>NA</i>           | 0.53  | 0.65  | 1.68 | 1.42 |
| ENSMUSG00000030670 | <i>Cyp2r1</i>       | 3.66  | 2.23  | 2.81 | 2.05 |
| ENSMUSG00000030671 | <i>Pde3b</i>        | 4.84  | 3.97  | 4.71 | 4.3  |
| ENSMUSG00000030672 | <i>Mylpf</i>        | -1.55 | -0.46 | 2.71 | 2.96 |
| ENSMUSG00000030674 | <i>Qprt</i>         | 6.52  | 6.89  | 6.61 | 6.3  |
| ENSMUSG00000030678 | <i>Maz</i>          | 4.68  | 5.51  | 4.86 | 4.9  |
| ENSMUSG00000030680 | <i>2900092E17Ri</i> | 3.66  | 4     | 3.95 | 3.63 |
| ENSMUSG00000030681 | <i>Mvp</i>          | 3.29  | 4.18  | 3.63 | 3.46 |
| ENSMUSG00000030682 | <i>Cdipt</i>        | 4.73  | 5.68  | 5.12 | 4.95 |
| ENSMUSG00000030685 | <i>Kctd13</i>       | 0.97  | 1.53  | 2.05 | 1.42 |
| ENSMUSG00000030688 | <i>Stard10</i>      | 9.45  | 10.13 | 9.74 | 9.55 |
| ENSMUSG00000030689 | <i>Ccdc95</i>       | 1.97  | 2.59  | 2    | 2.21 |
| ENSMUSG00000030691 | <i>mKIAA0769</i>    | 3.58  | 2.62  | 3.42 | 3.05 |
| ENSMUSG00000030695 | <i>Aldoa</i>        | 5.15  | 5.62  | 5.65 | 5.37 |
| ENSMUSG00000030697 | <i>Ppp4c</i>        | 4.91  | 5.21  | 4.75 | 4.73 |
| ENSMUSG00000030701 | <i>Plekhb1</i>      | 4.13  | 3.93  | 3.65 | 3.27 |
| ENSMUSG00000030703 | <i>Gdpd3</i>        | 3.54  | 3.81  | 4.22 | 3.99 |
| ENSMUSG00000030704 | <i>Rab6</i>         | 5.06  | 3.91  | 4.71 | 4.28 |
| ENSMUSG00000030706 | <i>Mrpl48</i>       | 2.57  | 1.95  | 2.59 | 2.54 |
| ENSMUSG00000030707 | <i>Coro1a</i>       | 1.08  | 1.46  | 2.82 | 1.02 |
| ENSMUSG00000030711 | <i>Sult1a1</i>      | 8.85  | 8.15  | 8.71 | 8.16 |



|                    |                 |        |        |      |        |
|--------------------|-----------------|--------|--------|------|--------|
| ENSMUSG00000030714 | <i>Ccdc101</i>  | 3.02   | 4.09   | 4.03 | 3.74   |
| ENSMUSG00000030718 | <i>Ppme1</i>    | 4.48   | 4.6    | 4.46 | 4.21   |
| ENSMUSG00000030720 | <i>Cln3</i>     | 2.23   | 2.77   | 2.55 | 2.38   |
| ENSMUSG00000030724 | <i>Cd19</i>     | -2.31  | #NAME? | 1.29 | #NAME? |
| ENSMUSG00000030726 | <i>Pold3</i>    | 1.78   | 1.66   | 2.07 | 1.73   |
| ENSMUSG00000030727 | <i>Rabep2</i>   | 1.44   | 1.82   | 1.58 | 1.63   |
| ENSMUSG00000030730 | <i>Atp2a1</i>   | -4.34  | -3.96  | 3.47 | 3.23   |
| ENSMUSG00000030731 | <i>Syt3</i>     | 1.8    | 2.8    | 1.93 | 2.21   |
| ENSMUSG00000030733 | <i>Psmbeta</i>  | 3.54   | 4.17   | 4.04 | 4.05   |
| ENSMUSG00000030737 | <i>Slco2b1</i>  | 6.13   | 6.31   | 6.15 | 5.98   |
| ENSMUSG00000030738 | <i>Eif3c</i>    | 5.82   | 6.07   | 5.82 | 5.67   |
| ENSMUSG00000030739 | <i>Myh14</i>    | 1.81   | 2.42   | 2.15 | 1.76   |
| ENSMUSG00000030741 | <i>Spns1</i>    | 3.48   | 4.39   | 4.12 | 4.02   |
| ENSMUSG00000030744 | <i>Rps3</i>     | 6.36   | 6.93   | 6.76 | 6.7    |
| ENSMUSG00000030747 | <i>Dgat2</i>    | 8.57   | 8.77   | 8.66 | 8.72   |
| ENSMUSG00000030748 | <i>Il4ra</i>    | 3.05   | 3.83   | 3.68 | 3.27   |
| ENSMUSG00000030750 | <i>Nsmce1</i>   | 2.72   | 3.54   | 2.73 | 2.87   |
| ENSMUSG00000030751 | <i>Psmal</i>    | 6.63   | 6.37   | 6.44 | 6.03   |
| ENSMUSG00000030753 | <i>Prkrir</i>   | 4.97   | 3.91   | 4.29 | 4.03   |
| ENSMUSG00000030754 | <i>Copb1</i>    | 5.63   | 5.36   | 5.61 | 5.19   |
| ENSMUSG00000030760 | <i>Phca</i>     | 2.59   | 1.54   | 2.11 | 1.45   |
| ENSMUSG00000030761 | <i>Myo7a</i>    | 1.22   | 1.96   | 0.97 | 1.34   |
| ENSMUSG00000030762 | <i>Aqp8</i>     | 6.67   | 6.9    | 6.14 | 6      |
| ENSMUSG00000030763 | <i>Lcmt1</i>    | 2.67   | 2.68   | 2.62 | 2.38   |
| ENSMUSG00000030766 | <i>Arhgap17</i> | 2.21   | 2.3    | 2.61 | 2.47   |
| ENSMUSG00000030770 | <i>Parva</i>    | 5.45   | 5.39   | 5.25 | 4.89   |
| ENSMUSG00000030779 | <i>Rbbp6</i>    | 3.31   | 2.55   | 3.02 | 2.69   |
| ENSMUSG00000030780 | <i>BC017158</i> | 3.7    | 3.79   | 3.5  | 3.05   |
| ENSMUSG00000030781 | <i>Slc5a2</i>   | 2.21   | 2.34   | 1.87 | 1.47   |
| ENSMUSG00000030785 | <i>Cox6a2</i>   | #NAME? | #NAME? | 2.53 | 2.66   |
| ENSMUSG00000030787 | <i>Lyve1</i>    | 2.19   | 2      | 1.12 | 2.13   |

|                    |                     |      |      |      |       |
|--------------------|---------------------|------|------|------|-------|
| ENSMUSG00000030788 | <i>Znf230</i>       | 4.76 | 3.94 | 4.3  | 3.7   |
| ENSMUSG00000030795 | <i>Fus</i>          | 3.64 | 4.08 | 4.08 | 3.93  |
| ENSMUSG00000030798 | <i>Cd37</i>         | 0.53 | 0.15 | 1.81 | -1.35 |
| ENSMUSG00000030801 | <i>Myst1</i>        | 3.47 | 3.78 | 3.69 | 3.55  |
| ENSMUSG00000030802 | <i>Bckdk</i>        | 2.57 | 3.38 | 3.05 | 2.69  |
| ENSMUSG00000030804 | <i>Vkorc1</i>       | 7.78 | 8.17 | 7.93 | 7.9   |
| ENSMUSG00000030805 | <i>Stx4a</i>        | 3.94 | 4.38 | 3.77 | 3.65  |
| ENSMUSG00000030815 | <i>Phkg2</i>        | 3.35 | 3.95 | 3.63 | 3.33  |
| ENSMUSG00000030816 | <i>Rnf40</i>        | 3.45 | 4.01 | 3.68 | 3.61  |
| ENSMUSG00000030822 | <i>Prr14</i>        | 4.39 | 4.82 | 4.56 | 4.38  |
| ENSMUSG00000030824 | <i>Nucb1</i>        | 6.71 | 7.41 | 6.91 | 6.79  |
| ENSMUSG00000030826 | <i>Bcat2</i>        | 4.13 | 4.56 | 4.42 | 3.96  |
| ENSMUSG00000030827 | <i>Fgf21</i>        | 2.69 | 2.84 | 2.86 | 3.14  |
| ENSMUSG00000030830 | <i>Itgal</i>        | 1.88 | 1.78 | 1.62 | 1.53  |
| ENSMUSG00000030834 | <i>Abcc6</i>        | 4.13 | 4.51 | 4.45 | 4.38  |
| ENSMUSG00000030835 | <i>Nomol</i>        | 3.94 | 4.52 | 4.07 | 3.95  |
| ENSMUSG00000030842 | <i>2400001E08Ri</i> | 4.21 | 4.85 | 4.68 | 4.44  |
| ENSMUSG00000030846 | <i>Tiall</i>        | 3.7  | 2.97 | 3.54 | 3.04  |
| ENSMUSG00000030847 | <i>Bag3</i>         | 4.47 | 4.96 | 4.62 | 5.3   |
| ENSMUSG00000030849 | <i>Fgfr2</i>        | 2.58 | 3.07 | 2.94 | 3     |
| ENSMUSG00000030850 | <i>Ate1</i>         | 3.51 | 2.95 | 3.19 | 2.66  |
| ENSMUSG00000030852 | <i>Tacc2</i>        | 2.65 | 2.52 | 2.36 | 1.97  |
| ENSMUSG00000030861 | <i>Acadsb</i>       | 6.5  | 5.5  | 6.02 | 5.62  |
| ENSMUSG00000030868 | <i>Dctn5</i>        | 4.54 | 4.28 | 4.5  | 4.57  |
| ENSMUSG00000030869 | <i>Ndufab1</i>      | 2.75 | 1.95 | 2.75 | 2.71  |
| ENSMUSG00000030870 | <i>Ubfd1</i>        | 3.89 | 3.85 | 3.28 | 3.67  |
| ENSMUSG00000030871 | <i>Ears2</i>        | 2.83 | 3.76 | 2.67 | 2.47  |
| ENSMUSG00000030872 | <i>Gga2</i>         | 3.2  | 3.51 | 3.32 | 3.03  |
| ENSMUSG00000030876 | <i>Mettl9</i>       | 5.31 | 4.29 | 4.57 | 3.97  |
| ENSMUSG00000030879 | <i>Mrpl17</i>       | 5.8  | 6.66 | 6.2  | 5.9   |
| ENSMUSG00000030880 | <i>Polr3e</i>       | 2.24 | 2.77 | 2.46 | 2.52  |

|                    |                     |       |       |      |       |
|--------------------|---------------------|-------|-------|------|-------|
| ENSMUSG00000030881 | <i>Arfp2</i>        | 2.18  | 2.95  | 2.25 | 2.39  |
| ENSMUSG00000030882 | <i>Fxc1</i>         | 1.04  | 1.37  | 1.62 | 1.79  |
| ENSMUSG00000030884 | <i>Uqcr2</i>        | 8     | 7.58  | 7.97 | 7.54  |
| ENSMUSG00000030887 | <i>4930408O21Ri</i> | 2.11  | -0.19 | 0.93 | 0.13  |
| ENSMUSG00000030888 | <i>1500003O22Ri</i> | 2.92  | 3.17  | 2.92 | 2.98  |
| ENSMUSG00000030890 | <i>Ilk</i>          | 4.82  | 4.73  | 5.01 | 4.95  |
| ENSMUSG00000030894 | <i>Tpp1</i>         | 5.68  | 5.73  | 5.82 | 5.62  |
| ENSMUSG00000030895 | <i>Hpx</i>          | 10.71 | 10.97 | 11   | 11.01 |
| ENSMUSG00000030909 | <i>Anks4b</i>       | 5.17  | 5.16  | 4.93 | 4.9   |
| ENSMUSG00000030917 | <i>Tmem159</i>      | 1.25  | 0.86  | 0.72 | 0.93  |
| ENSMUSG00000030921 | <i>Trim30</i>       | 1.05  | -0.2  | 0.08 | -0.45 |
| ENSMUSG00000030922 | <i>Lyrml</i>        | 1.33  | 1.1   | 1.49 | 1.27  |
| ENSMUSG00000030929 | <i>Exod1</i>        | 4.53  | 3.28  | 4.27 | 3.46  |
| ENSMUSG00000030930 | <i>4631426J05Ri</i> | 2.66  | 2.9   | 2.42 | 2.37  |
| ENSMUSG00000030934 | <i>Oat</i>          | 9.18  | 8.8   | 9.57 | 9.08  |
| ENSMUSG00000030935 | <i>Acsm3</i>        | 5.78  | 4.72  | 5.57 | 5.02  |
| ENSMUSG00000030942 | <i>Thumpd1</i>      | 3.74  | 3.4   | 3.47 | 3.21  |
| ENSMUSG00000030946 | <i>2310007H09Ri</i> | 5.99  | 6.11  | 6.1  | 5.69  |
| ENSMUSG00000030956 | <i>A930008G19Ri</i> | 2.13  | 2.02  | 2.85 | 2.47  |
| ENSMUSG00000030960 | <i>2010208K18Ri</i> | 1.99  | 1.14  | 1.58 | 1.67  |
| ENSMUSG00000030965 | <i>C430003P19Ri</i> | 3.99  | 3.66  | 3.94 | 3.64  |
| ENSMUSG00000030966 | <i>Trim21</i>       | 2.2   | 1.71  | 1.46 | 1.23  |
| ENSMUSG00000030967 | <i>Zranb1</i>       | 4.44  | 3.69  | 4.19 | 4.02  |
| ENSMUSG00000030968 | <i>NA</i>           | 1.58  | 1.11  | 0.36 | 1.07  |
| ENSMUSG00000030972 | <i>C730027J19Ri</i> | 5.66  | 5.73  | 5.29 | 5.23  |
| ENSMUSG00000030978 | <i>Rrm1</i>         | 2.02  | 1.87  | 2.33 | 2.16  |
| ENSMUSG00000030979 | <i>Uros</i>         | 3.35  | 3.48  | 3.5  | 2.92  |
| ENSMUSG00000030980 | <i>Tsg118</i>       | 3.75  | 3.65  | 3.6  | 3.47  |
| ENSMUSG00000030982 | <i>9030624J02Ri</i> | 3.25  | 3.45  | 3.58 | 3.3   |
| ENSMUSG00000030983 | <i>Bccip</i>        | 6.1   | 5.93  | 5.89 | 5.57  |
| ENSMUSG00000030986 | <i>Dhx32</i>        | 4.01  | 3.99  | 3.78 | 3.5   |

|                    |                    |       |        |      |      |
|--------------------|--------------------|-------|--------|------|------|
| ENSMUSG00000030987 | <i>Stim1</i>       | 4.19  | 4.54   | 4.38 | 4.28 |
| ENSMUSG00000030990 | <i>Frag1</i>       | 3.78  | 3.53   | 3.3  | 3.12 |
| ENSMUSG00000031007 | <i>Atp6ap2</i>     | 4.69  | 3.89   | 4.52 | 4.12 |
| ENSMUSG00000031010 | <i>Usp9x</i>       | 3.67  | 3      | 3.32 | 2.79 |
| ENSMUSG00000031012 | <i>Cask</i>        | 2.17  | 1.66   | 1.96 | 1.79 |
| ENSMUSG00000031015 | <i>Swap70</i>      | 1.04  | 1.49   | 1.89 | 1.58 |
| ENSMUSG00000031016 | <i>Wee1</i>        | 0.11  | -0.6   | 1.46 | 1.39 |
| ENSMUSG00000031021 | <i>Tmem9b</i>      | 4.17  | 3.97   | 4.08 | 3.94 |
| ENSMUSG00000031023 | <i>D930014E17R</i> | 4.17  | 3.81   | 3.76 | 3.7  |
| ENSMUSG00000031024 | <i>St5</i>         | 4.34  | 4.08   | 3.73 | 3.13 |
| ENSMUSG00000031029 | <i>Eif3f</i>       | 6.41  | 6.45   | 6.45 | 6.33 |
| ENSMUSG00000031059 | <i>Ndufb11</i>     | 5.65  | 5.88   | 6.2  | 6.02 |
| ENSMUSG00000031060 | <i>Rbm10</i>       | 1.56  | 2.13   | 1.88 | 1.39 |
| ENSMUSG00000031065 | <i>Pctk1</i>       | 3.34  | 3.33   | 3.28 | 2.98 |
| ENSMUSG00000031068 | <i>PICOT</i>       | 3.34  | 1.78   | 2.73 | 2.09 |
| ENSMUSG00000031072 | <i>Oraov1</i>      | 2.53  | 2.82   | 2.56 | 2.32 |
| ENSMUSG00000031077 | <i>Fadd</i>        | 3.02  | 3.36   | 3.23 | 3.31 |
| ENSMUSG00000031078 | <i>Ctnn</i>        | 3.75  | 3.82   | 3.74 | 3.55 |
| ENSMUSG00000031090 | <i>Nadsyn1</i>     | 3.11  | 3.38   | 3.39 | 3.01 |
| ENSMUSG00000031095 | <i>Cul4b</i>       | 3.94  | 2.68   | 3.59 | 3    |
| ENSMUSG00000031097 | <i>Tnni2</i>       | -4.02 | #NAME? | 2.89 | 3.84 |
| ENSMUSG00000031109 | <i>Enox2</i>       | 2.48  | 1.8    | 2.17 | 1.58 |
| ENSMUSG00000031119 | <i>Gpc4</i>        | 5.09  | 4.79   | 5.21 | 4.98 |
| ENSMUSG00000031129 | <i>Slc9a9</i>      | 1.48  | 1.39   | 0.64 | 0.64 |
| ENSMUSG00000031134 | <i>Rbmx</i>        | 2.42  | 1.84   | 2.02 | 1.67 |
| ENSMUSG00000031138 | <i>F9</i>          | 7.51  | 6.24   | 7.15 | 6.47 |
| ENSMUSG00000031143 | <i>Ccdc22</i>      | 2.58  | 3      | 2.96 | 3.1  |
| ENSMUSG00000031147 | <i>Pdzx</i>        | 3.32  | 4.19   | 3.82 | 3.71 |
| ENSMUSG00000031148 | <i>Gpkow</i>       | 3.18  | 2.41   | 2.71 | 2.5  |
| ENSMUSG00000031149 | <i>Praf2</i>       | 1.56  | 1.58   | 1.33 | 1.94 |
| ENSMUSG00000031153 | <i>Gripap1</i>     | 2.7   | 2.98   | 2.82 | 2.62 |

|                    |                     |      |      |      |      |
|--------------------|---------------------|------|------|------|------|
| ENSMUSG00000031154 | <i>Otud5</i>        | 3.67 | 3.65 | 3.87 | 3.5  |
| ENSMUSG00000031156 | <i>Slc35a2</i>      | 2.82 | 2.68 | 2.51 | 2.5  |
| ENSMUSG00000031157 | <i>Pqbp1</i>        | 4.19 | 4.34 | 4.34 | 4.1  |
| ENSMUSG00000031158 | <i>Timm17b</i>      | 5.37 | 5.59 | 5.43 | 5.28 |
| ENSMUSG00000031161 | <i>Hdac6</i>        | 2.19 | 2.53 | 2.32 | 2.57 |
| ENSMUSG00000031166 | <i>Wdr13</i>        | 3.25 | 3.24 | 2.73 | 2.61 |
| ENSMUSG00000031168 | <i>Ebp</i>          | 7.87 | 7.9  | 7.88 | 7.74 |
| ENSMUSG00000031169 | <i>Porcn</i>        | 1.45 | 2.29 | 1.57 | 1.38 |
| ENSMUSG00000031171 | <i>Ftsj1</i>        | 2.86 | 3.11 | 3.07 | 3.08 |
| ENSMUSG00000031173 | <i>Otc</i>          | 8.42 | 7.85 | 8.22 | 7.68 |
| ENSMUSG00000031176 | <i>Dynlt3</i>       | 5.88 | 4.71 | 5.43 | 4.88 |
| ENSMUSG00000031196 | <i>F8</i>           | 2.58 | 1.42 | 1.73 | 1.57 |
| ENSMUSG00000031197 | <i>Vbp1</i>         | 3.7  | 2.52 | 3.33 | 2.58 |
| ENSMUSG00000031198 | <i>Fundc2</i>       | 3.06 | 1.87 | 2.53 | 0.18 |
| ENSMUSG00000031201 | <i>Brcc3</i>        | 2.31 | 1.56 | 2.1  | 1.54 |
| ENSMUSG00000031207 | <i>Msn</i>          | 3.72 | 3.52 | 3.66 | 3.26 |
| ENSMUSG00000031216 | <i>Stard8</i>       | 2.7  | 2.71 | 2.22 | 1.96 |
| ENSMUSG00000031217 | <i>Efnb1</i>        | 3    | 3.71 | 2.87 | 2.85 |
| ENSMUSG00000031221 | <i>Igbp1</i>        | 5.63 | 5.54 | 5.46 | 5.46 |
| ENSMUSG00000031226 | <i>2610029G23R1</i> | 2.82 | 2.32 | 2.5  | 2.98 |
| ENSMUSG00000031229 | <i>Atrx</i>         | 2.77 | 1.96 | 2.23 | 1.59 |
| ENSMUSG00000031231 | <i>Cox7b</i>        | 6.22 | 6.9  | 6.86 | 7.65 |
| ENSMUSG00000031232 | <i>2610529C04R1</i> | 5.27 | 5.07 | 4.21 | 4.54 |
| ENSMUSG00000031242 | <i>2610002M06R1</i> | 3.01 | 2.36 | 2.49 | 1.89 |
| ENSMUSG00000031245 | <i>Nsbp1</i>        | 5.44 | 4.86 | 4.72 | 3.96 |
| ENSMUSG00000031246 | <i>Sh3bgrl</i>      | 6.21 | 4.46 | 5.54 | 4.8  |
| ENSMUSG00000031256 | <i>Cstf2</i>        | 2.4  | 2.18 | 2.33 | 1.96 |
| ENSMUSG00000031266 | <i>Gla</i>          | 2.27 | 1.47 | 2.08 | 1.56 |
| ENSMUSG00000031271 | <i>Serpina7</i>     | 3.55 | 3.04 | 2.68 | 2.09 |
| ENSMUSG00000031278 | <i>Acsl4</i>        | 3.94 | 3.29 | 3.69 | 3.31 |
| ENSMUSG00000031286 | <i>Glt28d2</i>      | 1.94 | 1.03 | 1.9  | 1.08 |

|                    |                |      |       |      |       |
|--------------------|----------------|------|-------|------|-------|
| ENSMUSG00000031295 | <i>Phka2</i>   | 2.6  | 2.54  | 2.36 | 2.46  |
| ENSMUSG00000031299 | <i>Pdhal</i>   | 6.23 | 5.51  | 6.09 | 5.53  |
| ENSMUSG00000031303 | <i>NA</i>      | 3.83 | 3.02  | 3.64 | 3.04  |
| ENSMUSG00000031304 | <i>Gm614</i>   | 0.37 | -0.08 | 1.3  | 0.34  |
| ENSMUSG00000031309 | <i>Rps6ka3</i> | 1.41 | 0.76  | 1.17 | 0.67  |
| ENSMUSG00000031310 | <i>Zmym3</i>   | 1.17 | 0.9   | 1.01 | 1.22  |
| ENSMUSG00000031311 | <i>Nono</i>    | 4.01 | 3.87  | 4.09 | 3.43  |
| ENSMUSG00000031314 | <i>Taf1</i>    | 1.78 | 1.29  | 1.53 | 1.1   |
| ENSMUSG00000031320 | <i>Rps4x</i>   | 3.91 | 5     | 4.79 | 3.95  |
| ENSMUSG00000031327 | <i>Chic1</i>   | 1.93 | 0.04  | 0.72 | -0.18 |
| ENSMUSG00000031328 | <i>Flna</i>    | 2.11 | 2.34  | 1.95 | 2.06  |
| ENSMUSG00000031333 | <i>NA</i>      | 4.27 | 3.03  | 3.74 | 3.19  |
| ENSMUSG00000031337 | <i>Mtm1</i>    | 2.47 | 1.39  | 2.36 | 1.73  |
| ENSMUSG00000031347 | <i>Cetn2</i>   | 4.27 | 3.14  | 3.73 | 3     |
| ENSMUSG00000031349 | <i>Nsdhl</i>   | 6.25 | 5.48  | 5.66 | 4.96  |
| ENSMUSG00000031352 | <i>Hccs</i>    | 3.23 | 2.41  | 3.07 | 2.64  |
| ENSMUSG00000031353 | <i>Rbbp7</i>   | 4.21 | 3.74  | 3.72 | 3.46  |
| ENSMUSG00000031357 | <i>Syap1</i>   | 5.79 | 4.27  | 5.2  | 4.56  |
| ENSMUSG00000031358 | <i>Msl3l</i>   | 4.7  | 3.76  | 4.36 | 3.82  |
| ENSMUSG00000031360 | <i>Ctps2</i>   | 2.14 | 1.72  | 1.56 | 1.42  |
| ENSMUSG00000031365 | <i>Zfp275</i>  | 2.21 | 2.04  | 1.88 | 1.43  |
| ENSMUSG00000031371 | <i>Uchl5ip</i> | 2.97 | 3.27  | 2.83 | 2.08  |
| ENSMUSG00000031373 | <i>Car5b</i>   | 1.05 | 0.91  | 1.23 | 0.68  |
| ENSMUSG00000031375 | <i>Bgn</i>     | 6.41 | 6.54  | 6.57 | 6.34  |
| ENSMUSG00000031378 | <i>Abcd1</i>   | 3.4  | 3.74  | 3.99 | 3.3   |
| ENSMUSG00000031379 | <i>Pir</i>     | 3.97 | 4.02  | 3.97 | 3.9   |
| ENSMUSG00000031381 | <i>Piga</i>    | 1.1  | 1.17  | 0.81 | 0.92  |
| ENSMUSG00000031386 | <i>Hcfe1</i>   | 2.82 | 3.34  | 3.08 | 2.88  |
| ENSMUSG00000031387 | <i>Renbp</i>   | 1.06 | 1.61  | 1.41 | 1.16  |
| ENSMUSG00000031388 | <i>Ard1</i>    | 3.63 | 4.14  | 4.13 | 3.87  |
| ENSMUSG00000031392 | <i>IRAK1-S</i> | 4.85 | 4.88  | 4.73 | 4.46  |

|                    |                     |      |      |       |       |
|--------------------|---------------------|------|------|-------|-------|
| ENSMUSG00000031393 | <i>Mecp2</i>        | 1.84 | 1.36 | 1.72  | 1.32  |
| ENSMUSG00000031399 | <i>I810037C20Ri</i> | 2.57 | 3.53 | 3.32  | 3.02  |
| ENSMUSG00000031400 | <i>G6pdx</i>        | 1.36 | 1.74 | 1.03  | 1.17  |
| ENSMUSG00000031402 | <i>Mpp1</i>         | 3.72 | 3.48 | 3.74  | 3.46  |
| ENSMUSG00000031403 | <i>Dkc1</i>         | 3.31 | 3.58 | 3.41  | 2.8   |
| ENSMUSG00000031422 | <i>Morf4l2</i>      | 4.4  | 4.6  | 3.89  | 3.71  |
| ENSMUSG00000031429 | <i>Psm10</i>        | 3.05 | 2.96 | 2.46  | 3.05  |
| ENSMUSG00000031431 | <i>Tsc22d3</i>      | 6.93 | 6.56 | 6.84  | 7.02  |
| ENSMUSG00000031432 | <i>Prps1</i>        | 4.19 | 4.21 | 4.28  | 3.89  |
| ENSMUSG00000031433 | <i>Rbm41</i>        | 1.01 | -1.6 | -0.36 | -0.52 |
| ENSMUSG00000031438 | <i>Rnf128</i>       | 6.16 | 5.37 | 5.7   | 5.19  |
| ENSMUSG00000031443 | <i>F7</i>           | 6.26 | 6.86 | 6.32  | 6.19  |
| ENSMUSG00000031444 | <i>F10</i>          | 7.91 | 8.47 | 8.09  | 8.01  |
| ENSMUSG00000031445 | <i>Proz</i>         | 7.78 | 7.63 | 7.49  | 7.34  |
| ENSMUSG00000031446 | <i>Cul4a</i>        | 5.28 | 5.19 | 5.28  | 5.08  |
| ENSMUSG00000031447 | <i>Lamp1</i>        | 8.59 | 8.42 | 8.55  | 8.4   |
| ENSMUSG00000031451 | <i>Gas6</i>         | 4.18 | 4.88 | 3.83  | 3.93  |
| ENSMUSG00000031453 | <i>Rasa3</i>        | 2.1  | 2.27 | 2.88  | 2.52  |
| ENSMUSG00000031458 | <i>2410022L05Ri</i> | 1.69 | 1.66 | 1.57  | 0.33  |
| ENSMUSG00000031467 | <i>Agpat5</i>       | 3.84 | 3.12 | 3.28  | 3.07  |
| ENSMUSG00000031478 | <i>Nek3</i>         | 0.19 | 0.45 | 1.31  | -0.17 |
| ENSMUSG00000031479 | <i>Vps36</i>        | 4.38 | 3.81 | 3.75  | 3.61  |
| ENSMUSG00000031482 | <i>Slc25a15</i>     | 7.99 | 7.05 | 7.85  | 7.28  |
| ENSMUSG00000031483 | <i>Erlin2</i>       | 4.27 | 3.6  | 3.99  | 3.68  |
| ENSMUSG00000031485 | <i>Prosc</i>        | 5.89 | 5.53 | 5.83  | 5.63  |
| ENSMUSG00000031487 | <i>Brf2</i>         | 2.24 | 2.93 | 2.89  | 2.48  |
| ENSMUSG00000031488 | <i>Rab11fip1</i>    | 1.32 | 1.64 | 1.59  | 1.52  |
| ENSMUSG00000031490 | <i>Eif4ebp1</i>     | 4.76 | 5.76 | 5.45  | 5.34  |
| ENSMUSG00000031502 | <i>Col4a1</i>       | 2.71 | 3.49 | 2.97  | 2.83  |
| ENSMUSG00000031503 | <i>Col4a2</i>       | 2.15 | 2.72 | 2.5   | 2.17  |
| ENSMUSG00000031504 | <i>Rab20</i>        | 2.01 | 3.21 | 2.39  | 2.35  |

|                    |                     |      |      |      |      |
|--------------------|---------------------|------|------|------|------|
| ENSMUSG00000031505 | <i>0710008K08Ri</i> | 5.45 | 5.86 | 5.56 | 5.44 |
| ENSMUSG00000031508 | <i>Ankrd10</i>      | 1.47 | 1.74 | 1.61 | 1.15 |
| ENSMUSG00000031511 | <i>Arhgef7</i>      | 2.06 | 2.63 | 2.22 | 1.99 |
| ENSMUSG00000031513 | <i>Leprotl1</i>     | 3.51 | 3.17 | 3.14 | 3.02 |
| ENSMUSG00000031516 | <i>Dctn6</i>        | 3.26 | 3.52 | 3.29 | 2.96 |
| ENSMUSG00000031520 | <i>Vegfc</i>        | 1.19 | 0.69 | 0.88 | 0.97 |
| ENSMUSG00000031521 | <i>Aga</i>          | 4.18 | 3.01 | 3.73 | 3.32 |
| ENSMUSG00000031523 | <i>Dlc1</i>         | 2.89 | 3.2  | 2.75 | 2.63 |
| ENSMUSG00000031527 | <i>Thex1</i>        | 2.75 | 1.71 | 2.41 | 2    |
| ENSMUSG00000031529 | <i>Tnks</i>         | 2.27 | 1.81 | 2.02 | 1.97 |
| ENSMUSG00000031532 | <i>Tmem66</i>       | 6.02 | 5.77 | 5.59 | 5.68 |
| ENSMUSG00000031533 | <i>Mrps31</i>       | 4.76 | 4.93 | 5.05 | 4.78 |
| ENSMUSG00000031534 | <i>A1316807</i>     | 4.56 | 4.12 | 4.21 | 3.86 |
| ENSMUSG00000031536 | <i>Polb</i>         | 3.86 | 3.52 | 4.14 | 3.63 |
| ENSMUSG00000031537 | <i>Ikkbb</i>        | 3.81 | 3.92 | 3.79 | 3.66 |
| ENSMUSG00000031540 | <i>Myst3</i>        | 2.66 | 2.24 | 2.54 | 2.33 |
| ENSMUSG00000031545 | <i>Agpat6</i>       | 6.36 | 6.45 | 6.09 | 5.78 |
| ENSMUSG00000031546 | <i>Gins4</i>        | 3.58 | 3.57 | 3.63 | 3.35 |
| ENSMUSG00000031549 | <i>Indol1</i>       | 5.99 | 5.76 | 6.47 | 6.18 |
| ENSMUSG00000031555 | <i>Adam9</i>        | 4.94 | 4.7  | 4.69 | 4.46 |
| ENSMUSG00000031556 | <i>Tm2d2</i>        | 5.84 | 6.32 | 5.86 | 5.61 |
| ENSMUSG00000031557 | <i>Plekha2</i>      | 1.09 | 0.65 | 0.79 | 0.38 |
| ENSMUSG00000031561 | <i>Odz3</i>         | 1.86 | 1.17 | 2.05 | 1.44 |
| ENSMUSG00000031563 | <i>BC040690</i>     | 1.83 | 1.67 | 2.12 | 1.79 |
| ENSMUSG00000031568 | <i>Rwdd4a</i>       | 3.97 | 3.72 | 3.78 | 3.75 |
| ENSMUSG00000031570 | <i>Ppapdc1</i>      | 4.05 | 4.1  | 3.4  | 3.15 |
| ENSMUSG00000031575 | <i>Ash2l</i>        | 2.78 | 3    | 3.11 | 2.79 |
| ENSMUSG00000031577 | <i>BC019943</i>     | 2.72 | 2.61 | 2.62 | 2.58 |
| ENSMUSG00000031578 | <i>Rbm13</i>        | 3.74 | 3.18 | 3.34 | 3.27 |
| ENSMUSG00000031583 | <i>Wrn</i>          | 1.78 | 0.9  | 1.56 | 1.59 |
| ENSMUSG00000031584 | <i>Gsr</i>          | 5.23 | 5.14 | 5.03 | 4.8  |



|                    |                     |      |       |      |      |
|--------------------|---------------------|------|-------|------|------|
| ENSMUSG00000031585 | <i>Gtf2e2</i>       | 3.63 | 3.03  | 3.4  | 2.99 |
| ENSMUSG00000031586 | <i>Rbpms</i>        | 4.33 | 4.11  | 4.28 | 3.96 |
| ENSMUSG00000031590 | <i>Frg1</i>         | 4.53 | 3.4   | 4.38 | 3.78 |
| ENSMUSG00000031591 | <i>Asah1</i>        | 4.9  | 3.83  | 4.48 | 3.85 |
| ENSMUSG00000031592 | <i>pcm-1</i>        | 2.4  | 1.32  | 2.05 | 1.54 |
| ENSMUSG00000031594 | <i>Fgl1</i>         | 8.71 | 9.01  | 8.43 | 8.19 |
| ENSMUSG00000031596 | <i>Slc7a2</i>       | 7.27 | 6.24  | 7.14 | 6.54 |
| ENSMUSG00000031600 | <i>Vps37a</i>       | 3.73 | 2.56  | 3.35 | 2.97 |
| ENSMUSG00000031601 | <i>Cnot7</i>        | 3.88 | 2.71  | 3.41 | 2.83 |
| ENSMUSG00000031604 | <i>Sc4mol</i>       | 6.76 | 5.86  | 6.04 | 5.5  |
| ENSMUSG00000031605 | <i>Klhl2</i>        | 3.75 | 3.62  | 3.67 | 3.83 |
| ENSMUSG00000031609 | <i>Sap30</i>        | 1.32 | 1.78  | 1.85 | 1.08 |
| ENSMUSG00000031613 | <i>Hpgd</i>         | 7.77 | 6.83  | 7.05 | 6.77 |
| ENSMUSG00000031616 | <i>Ednra</i>        | 1.06 | 0.67  | 0.86 | 0.6  |
| ENSMUSG00000031617 | <i>Tmem34</i>       | 3.44 | 2.98  | 3.12 | 2.29 |
| ENSMUSG00000031618 | <i>Nr3c2</i>        | 0.1  | -0.53 | 1.66 | 1.49 |
| ENSMUSG00000031622 | <i>NA</i>           | 3.13 | 3.67  | 3.1  | 3.19 |
| ENSMUSG00000031626 | <i>Sorbs2</i>       | 3.9  | 3.23  | 3.49 | 3.35 |
| ENSMUSG00000031627 | <i>Irf2</i>         | 5.45 | 5.2   | 5.54 | 5.23 |
| ENSMUSG00000031628 | <i>Casp3</i>        | 3.96 | 3.31  | 3.25 | 2.84 |
| ENSMUSG00000031631 | <i>4933411K20Ri</i> | 2.92 | 2.1   | 2.51 | 2.1  |
| ENSMUSG00000031633 | <i>Slc25a4</i>      | 2.34 | 1.9   | 2.91 | 2.94 |
| ENSMUSG00000031634 | <i>1810047C23Ri</i> | 4.94 | 4.36  | 4.78 | 4.42 |
| ENSMUSG00000031640 | <i>Klkb1</i>        | 6.89 | 6.47  | 6.8  | 6.54 |
| ENSMUSG00000031641 | <i>Cbr4</i>         | 4.55 | 4.32  | 4.29 | 3.7  |
| ENSMUSG00000031644 | <i>Nek1</i>         | 2.13 | 0.87  | 1.61 | 1    |
| ENSMUSG00000031645 | <i>F11</i>          | 5.82 | 5.44  | 5.77 | 5.47 |
| ENSMUSG00000031652 | <i>NA</i>           | 3    | 2.97  | 3.05 | 2.69 |
| ENSMUSG00000031657 | <i>Heatr3</i>       | 3.86 | 3.79  | 3.84 | 3.62 |
| ENSMUSG00000031660 | <i>Brd7</i>         | 4.37 | 4.36  | 4.5  | 4.06 |
| ENSMUSG00000031661 | <i>Nkd1</i>         | 1.13 | 2.53  | 2.13 | 2.18 |

|                    |                     |      |       |       |       |
|--------------------|---------------------|------|-------|-------|-------|
| ENSMUSG00000031665 | <i>Sall1</i>        | 3.67 | 4.06  | 4.01  | 3.92  |
| ENSMUSG00000031666 | <i>Rbl2</i>         | 4.27 | 3.71  | 4.39  | 3.8   |
| ENSMUSG00000031667 | <i>Aktip</i>        | 2.99 | 2.49  | 2.93  | 2.48  |
| ENSMUSG00000031668 | <i>Eif2ak3</i>      | 2.12 | 2.83  | 2.16  | 2.18  |
| ENSMUSG00000031671 | <i>Setd6</i>        | 3.58 | 3.58  | 2.95  | 2.78  |
| ENSMUSG00000031672 | <i>Got2</i>         | 6.5  | 6.69  | 6.61  | 6.31  |
| ENSMUSG00000031681 | <i>Smad1</i>        | 2.03 | 2.02  | 2     | 1.77  |
| ENSMUSG00000031683 | <i>Lsm6</i>         | 2.1  | 2.07  | 2.07  | 1.81  |
| ENSMUSG00000031684 | <i>P7</i>           | 1.53 | 1.34  | 1.49  | 1.41  |
| ENSMUSG00000031691 | <i>Tnpo2</i>        | 3.64 | 3.95  | 3.91  | 3.63  |
| ENSMUSG00000031696 | <i>Vps35</i>        | 5.91 | 4.83  | 5.42  | 4.87  |
| ENSMUSG00000031697 | <i>Orc6l</i>        | 1.52 | 1.45  | 1.55  | -0.1  |
| ENSMUSG00000031700 | <i>Gpt2</i>         | 7.62 | 7.16  | 7.94  | 7.16  |
| ENSMUSG00000031701 | <i>Dnaja2</i>       | 6.27 | 5.86  | 6.12  | 5.62  |
| ENSMUSG00000031703 | <i>Itfg1</i>        | 5.4  | 4.63  | 4.91  | 4.42  |
| ENSMUSG00000031706 | <i>Rfx1</i>         | 1.76 | 2.35  | 1.93  | 1.67  |
| ENSMUSG00000031708 | <i>Gpsn2</i>        | 7.58 | 7.82  | 7.85  | 7.74  |
| ENSMUSG00000031711 | <i>Zfp330</i>       | 2.17 | 2.35  | 2.28  | 2.23  |
| ENSMUSG00000031714 | <i>Gab1</i>         | 2.28 | 2     | 2.34  | 2.23  |
| ENSMUSG00000031715 | <i>Smarca5</i>      | 2.19 | 0.55  | 1.62  | 0.69  |
| ENSMUSG00000031722 | <i>Hp</i>           | 9.94 | 10.43 | 10.13 | 10.25 |
| ENSMUSG00000031723 | <i>Txn14b</i>       | 3.26 | 3.28  | 3.24  | 3.16  |
| ENSMUSG00000031725 | <i>AU018778</i>     | 8.09 | 8.04  | 7.77  | 7.76  |
| ENSMUSG00000031729 | <i>mKIAA0174</i>    | 5.04 | 4.89  | 4.91  | 4.72  |
| ENSMUSG00000031730 | <i>Dhodh</i>        | 2.27 | 2.75  | 2.47  | 2.09  |
| ENSMUSG00000031731 | <i>Aplg1</i>        | 5.41 | 4.98  | 4.98  | 4.77  |
| ENSMUSG00000031750 | <i>2010004A03Ri</i> | 1.33 | 2.11  | 1.58  | 1.42  |
| ENSMUSG00000031751 | <i>Amfr</i>         | 7.32 | 7.51  | 7.01  | 6.94  |
| ENSMUSG00000031753 | <i>Cog4</i>         | 4.94 | 4.88  | 4.87  | 4.55  |
| ENSMUSG00000031755 | <i>Bbs2</i>         | 1.05 | 0.16  | 0.85  | 1.12  |
| ENSMUSG00000031762 | <i>Mt2</i>          | 8.79 | 8.06  | 8.56  | 8.24  |

|                    |                     |       |      |      |      |
|--------------------|---------------------|-------|------|------|------|
| ENSMUSG00000031765 | <i>Mtl</i>          | 8.79  | 8.04 | 8.8  | 8.56 |
| ENSMUSG00000031767 | <i>Nudt7</i>        | 5.46  | 5.45 | 5.18 | 5.45 |
| ENSMUSG00000031770 | <i>Herpud1</i>      | 8.22  | 8.99 | 8.66 | 8.74 |
| ENSMUSG00000031774 | <i>2310065K24Ri</i> | 3.89  | 4.37 | 4.11 | 4.02 |
| ENSMUSG00000031775 | <i>Pllp</i>         | 3.24  | 4.32 | 4.1  | 3.97 |
| ENSMUSG00000031776 | <i>Arl2bp</i>       | 1.04  | 1.24 | 1.47 | 0.7  |
| ENSMUSG00000031781 | <i>Ciapi1</i>       | 4.65  | 5.34 | 5.29 | 5.19 |
| ENSMUSG00000031782 | <i>Coq9</i>         | 5.96  | 6.24 | 6.16 | 6.01 |
| ENSMUSG00000031783 | <i>Polr2c</i>       | 1.66  | 1.89 | 2.09 | 1.88 |
| ENSMUSG00000031788 | <i>Kifc3</i>        | 1.56  | 2.84 | 1.68 | 1.55 |
| ENSMUSG00000031790 | <i>Mmp15</i>        | 3.12  | 3.47 | 3.74 | 3.61 |
| ENSMUSG00000031791 | <i>Tmem38a</i>      | -0.03 | 0.52 | 1.02 | 0.86 |
| ENSMUSG00000031792 | <i>AA960436</i>     | 3.07  | 3.09 | 3.03 | 2.82 |
| ENSMUSG00000031796 | <i>Gtl3</i>         | 4.2   | 4.29 | 4.63 | 4.2  |
| ENSMUSG00000031799 | <i>Tpm4</i>         | 3.5   | 2.98 | 2.83 | 2.68 |
| ENSMUSG00000031805 | <i>Jak3</i>         | 1.02  | 1.48 | 1.38 | 0.37 |
| ENSMUSG00000031807 | <i>Pgls</i>         | 4.87  | 5.7  | 5.42 | 5.42 |
| ENSMUSG00000031808 | <i>Slc27a1</i>      | 1.39  | 2.21 | 2.04 | 1.34 |
| ENSMUSG00000031811 | <i>Fbxo31</i>       | 5.55  | 6.32 | 6.12 | 5.7  |
| ENSMUSG00000031812 | <i>Map1lc3b</i>     | 6.71  | 6.5  | 6.85 | 6.52 |
| ENSMUSG00000031813 | <i>1110012M11Ri</i> | 5.05  | 5.98 | 5.87 | 5.73 |
| ENSMUSG00000031816 | <i>Mthfsd</i>       | 2.22  | 2.38 | 2.13 | 1.9  |
| ENSMUSG00000031818 | <i>Cox4i1</i>       | 8.06  | 8.74 | 8.61 | 8.6  |
| ENSMUSG00000031819 | <i>Cox4nb</i>       | 3.51  | 4.33 | 4.13 | 4    |
| ENSMUSG00000031820 | <i>5430437P03Ri</i> | 5.18  | 5.97 | 5.64 | 5.39 |
| ENSMUSG00000031822 | <i>Gsel</i>         | 1.1   | 2.85 | 1.69 | 1.39 |
| ENSMUSG00000031823 | <i>Zdhhc7</i>       | 3.58  | 3.98 | 3.56 | 3.23 |
| ENSMUSG00000031826 | <i>Usp10</i>        | 4.82  | 5.38 | 5.16 | 4.93 |
| ENSMUSG00000031827 | <i>Cot11</i>        | 2.99  | 3.61 | 3.56 | 2.88 |
| ENSMUSG00000031828 | <i>BC025816</i>     | 1.15  | 2.34 | 1.43 | 1.51 |
| ENSMUSG00000031833 | <i>NA</i>           | 2.87  | 3.73 | 3.43 | 3.21 |

|                    |                     |      |      |      |      |
|--------------------|---------------------|------|------|------|------|
| ENSMUSG00000031834 | <i>Pik3r2</i>       | 3.09 | 4.05 | 3.38 | 3.11 |
| ENSMUSG00000031835 | <i>Mbtps1</i>       | 4.78 | 4.88 | 4.63 | 4.54 |
| ENSMUSG00000031838 | <i>Ifi30</i>        | 4.32 | 4.56 | 4.86 | 4.34 |
| ENSMUSG00000031839 | <i>Hsbp1</i>        | 6.72 | 6.61 | 6.64 | 6.51 |
| ENSMUSG00000031840 | <i>Rab3a</i>        | 0.88 | 2.6  | 2.01 | 1.31 |
| ENSMUSG00000031841 | <i>Cdh13</i>        | 0.94 | 0.96 | 1.3  | 0.49 |
| ENSMUSG00000031842 | <i>Pde4c</i>        | 2.16 | 3.01 | 3.05 | 2.48 |
| ENSMUSG00000031843 | <i>Mphosph6</i>     | 1.47 | 0.36 | 0.13 | -0.7 |
| ENSMUSG00000031844 | <i>Hsd17b2</i>      | 7.17 | 7.38 | 6.74 | 6.78 |
| ENSMUSG00000031845 | <i>Bcmo1</i>        | 2.87 | 2.6  | 3.09 | 2.57 |
| ENSMUSG00000031848 | <i>Lsm4</i>         | 3.48 | 3.84 | 4.04 | 3.59 |
| ENSMUSG00000031851 | <i>2310079N02Ri</i> | 1.63 | 2.3  | 2.02 | 1.66 |
| ENSMUSG00000031853 | <i>BC021891</i>     | 1.28 | 1.29 | 1.19 | 0.55 |
| ENSMUSG00000031858 | <i>mKIAA0892</i>    | 3.48 | 3.87 | 3.48 | 3.12 |
| ENSMUSG00000031862 | <i>Atp13a1</i>      | 3.75 | 4.57 | 4.21 | 4.16 |
| ENSMUSG00000031864 | <i>Ints10</i>       | 1.46 | 1.7  | 1.42 | 0.79 |
| ENSMUSG00000031865 | <i>Dctn1</i>        | 2.75 | 3.45 | 3.4  | 2.98 |
| ENSMUSG00000031871 | <i>Cdh5</i>         | 3.38 | 3.72 | 3.17 | 3.37 |
| ENSMUSG00000031875 | <i>Cmtm3</i>        | 2.5  | 2.74 | 2.46 | 2.52 |
| ENSMUSG00000031877 | <i>2210023G05Ri</i> | 4.76 | 4.59 | 4.9  | 4.36 |
| ENSMUSG00000031878 | <i>Appbp1</i>       | 3.9  | 3.13 | 3.75 | 2.95 |
| ENSMUSG00000031879 | <i>1110019N10Ri</i> | 3.43 | 3.9  | 3.58 | 3.37 |
| ENSMUSG00000031885 | <i>Cbfb</i>         | 3.39 | 2.27 | 2.68 | 2.52 |
| ENSMUSG00000031886 | <i>Ces5</i>         | 6.43 | 6.13 | 6.27 | 6.05 |
| ENSMUSG00000031887 | <i>Tradd</i>        | 2.21 | 3.36 | 2.97 | 2.78 |
| ENSMUSG00000031889 | <i>D230025D16Ri</i> | 5.35 | 4.63 | 4.93 | 4.79 |
| ENSMUSG00000031897 | <i>Psmb10</i>       | 4.35 | 4.89 | 4.15 | 4.42 |
| ENSMUSG00000031901 | <i>Dus2l</i>        | 2.17 | 2.63 | 2.16 | 2.02 |
| ENSMUSG00000031902 | <i>Nfatc3</i>       | 4.1  | 3.75 | 3.72 | 3.5  |
| ENSMUSG00000031903 | <i>Lypla3</i>       | 2.77 | 2.92 | 2.86 | 2.64 |
| ENSMUSG00000031913 | <i>Vps4a</i>        | 4.07 | 3.94 | 3.74 | 3.72 |

|                    |                     |        |       |      |      |
|--------------------|---------------------|--------|-------|------|------|
| ENSMUSG00000031916 | <i>Cog8</i>         | 4.56   | 4.75  | 4.41 | 4.17 |
| ENSMUSG00000031917 | <i>Nip7</i>         | 3.26   | 3.34  | 3.55 | 3.3  |
| ENSMUSG00000031918 | <i>Mtmr2</i>        | 2.81   | 2.51  | 2.65 | 2.37 |
| ENSMUSG00000031921 | <i>Terf2</i>        | 1.94   | 1.58  | 2.07 | 1.57 |
| ENSMUSG00000031922 | <i>Cep57</i>        | 2.99   | 1.82  | 2.5  | 2.05 |
| ENSMUSG00000031924 | <i>Cyb5b</i>        | 7.48   | 7.03  | 6.7  | 6.52 |
| ENSMUSG00000031930 | <i>Wwp2</i>         | 2.98   | 3.43  | 3.12 | 2.7  |
| ENSMUSG00000031931 | <i>Ankrd49</i>      | 2.85   | 1.99  | 2.63 | 2.12 |
| ENSMUSG00000031935 | <i>Med17</i>        | 3.09   | 3.11  | 2.94 | 2.75 |
| ENSMUSG00000031938 | <i>4931406C07Ri</i> | 7.23   | 6.64  | 6.93 | 6.46 |
| ENSMUSG00000031939 | <i>Josd3</i>        | 2.19   | 1.03  | 2.01 | 1.09 |
| ENSMUSG00000031948 | <i>Kars</i>         | 5.59   | 5.65  | 5.43 | 5.28 |
| ENSMUSG00000031950 | <i>Gabarapl2</i>    | 2.21   | 3.64  | 3.23 | 3.11 |
| ENSMUSG00000031953 | <i>Tmem170</i>      | 2.92   | 2.3   | 2.7  | 2.14 |
| ENSMUSG00000031954 | <i>Cfdp1</i>        | 5.35   | 5.42  | 5.05 | 4.82 |
| ENSMUSG00000031955 | <i>Bcar1</i>        | 3.18   | 4.42  | 3.74 | 3.75 |
| ENSMUSG00000031958 | <i>Ldhd</i>         | 6.28   | 6.42  | 6.41 | 6    |
| ENSMUSG00000031959 | <i>Wdr59</i>        | 1.88   | 1.98  | 1.74 | 1.15 |
| ENSMUSG00000031960 | <i>Aars</i>         | 6.02   | 6.58  | 6.16 | 6.14 |
| ENSMUSG00000031967 | <i>Afg3l1</i>       | 5.13   | 4.9   | 4.83 | 4.47 |
| ENSMUSG00000031969 | <i>Acad8</i>        | 4.97   | 4.72  | 4.83 | 4.56 |
| ENSMUSG00000031972 | <i>Acta1</i>        | #NAME? | -4.85 | 4.81 | 4.89 |
| ENSMUSG00000031974 | <i>Abcb10</i>       | 3.42   | 3.37  | 3.49 | 3.02 |
| ENSMUSG00000031976 | <i>AK122209</i>     | 1.45   | 1.52  | 1.27 | 1.23 |
| ENSMUSG00000031977 | <i>Galnt2</i>       | 4.51   | 4.68  | 4.19 | 3.91 |
| ENSMUSG00000031979 | <i>Cog2</i>         | 3.42   | 3.39  | 3.25 | 2.84 |
| ENSMUSG00000031980 | <i>Agt</i>          | 9.17   | 9.78  | 9.8  | 9.57 |
| ENSMUSG00000031983 | <i>2310022B05Ri</i> | 2.94   | 3.29  | 3.16 | 2.52 |
| ENSMUSG00000031984 | <i>2810004N23Ri</i> | 4.72   | 4.41  | 4.53 | 4.35 |
| ENSMUSG00000031985 | <i>AK148282</i>     | 4.76   | 5.08  | 4.77 | 4.48 |
| ENSMUSG00000031986 | <i>NA</i>           | 1.06   | 1.14  | 1.18 | 1.07 |

|                    |                     |       |       |      |       |
|--------------------|---------------------|-------|-------|------|-------|
| ENSMUSG00000031987 | <i>Egln1</i>        | 4.03  | 4.29  | 3.94 | 4.12  |
| ENSMUSG00000031988 | <i>AK040818</i>     | 3.76  | 4.11  | 4.04 | 3.8   |
| ENSMUSG00000031993 | <i>Snx19</i>        | 3.46  | 3.42  | 3.54 | 3.27  |
| ENSMUSG00000031996 | <i>Aplp2</i>        | 7.28  | 6.85  | 7.03 | 6.81  |
| ENSMUSG00000032000 | <i>Birc3</i>        | 1.57  | 0.95  | 1.76 | 1.09  |
| ENSMUSG00000032002 | <i>Dcun1d5</i>      | 4.29  | 3.38  | 3.91 | 3.26  |
| ENSMUSG00000032009 | <i>Sesn3</i>        | 2.5   | 1.86  | 2.09 | 1.74  |
| ENSMUSG00000032010 | <i>Usp2</i>         | 3.34  | 3.26  | 4.42 | 4.46  |
| ENSMUSG00000032012 | <i>Pvrl1</i>        | 3.75  | 4.53  | 4.2  | 4.09  |
| ENSMUSG00000032014 | <i>Oaf</i>          | 7.06  | 7.53  | 7.59 | 7.51  |
| ENSMUSG00000032018 | <i>Sc5d</i>         | 7.56  | 6.9   | 6.58 | 6.5   |
| ENSMUSG00000032026 | <i>Rexo2</i>        | 6.22  | 6.4   | 6.11 | 5.78  |
| ENSMUSG00000032028 | <i>4432416J03Ri</i> | 3.02  | 2.9   | 2.52 | 2.88  |
| ENSMUSG00000032030 | <i>Cul5</i>         | 2.83  | 2.13  | 2.61 | 1.96  |
| ENSMUSG00000032035 | <i>Ets1</i>         | 2.86  | 2.77  | 2.6  | 2.23  |
| ENSMUSG00000032038 | <i>St3gal4</i>      | 5.9   | 5.96  | 5.72 | 5.66  |
| ENSMUSG00000032040 | <i>Dcps</i>         | 3.83  | 4     | 3.93 | 3.81  |
| ENSMUSG00000032041 | <i>Tirap</i>        | 3.78  | 3.4   | 3.32 | 3.26  |
| ENSMUSG00000032042 | <i>Srpr</i>         | 5.84  | 6.25  | 5.67 | 5.73  |
| ENSMUSG00000032044 | <i>Rpusd4</i>       | 2.2   | 2.16  | 2.7  | 2.25  |
| ENSMUSG00000032046 | <i>NA</i>           | 4.69  | 4.53  | 4.38 | 4.11  |
| ENSMUSG00000032047 | <i>Acat1</i>        | 8.38  | 8.11  | 8.21 | 7.95  |
| ENSMUSG00000032050 | <i>Rdx</i>          | 6.49  | 5.87  | 6.24 | 5.82  |
| ENSMUSG00000032051 | <i>Fdx1</i>         | 6.42  | 6.56  | 6.5  | 6.48  |
| ENSMUSG00000032053 | <i>Pou2af1</i>      | -1.78 | -2.69 | 1.08 | -3.67 |
| ENSMUSG00000032058 | <i>Ppp2r1b</i>      | 2.82  | 2.54  | 2.59 | 2.25  |
| ENSMUSG00000032059 | <i>Alg9</i>         | 2.84  | 3.06  | 2.82 | 2.57  |
| ENSMUSG00000032060 | <i>Cryab</i>        | 1.33  | 2.13  | 1.55 | 2.3   |
| ENSMUSG00000032062 | <i>2310030G06Rt</i> | 3.69  | 3.44  | 3.54 | 3.34  |
| ENSMUSG00000032065 | <i>Tex12</i>        | 2.5   | 1     | 1.89 | 0.18  |
| ENSMUSG00000032066 | <i>Bcdo2</i>        | 2.98  | 3.5   | 3.49 | 3.36  |

|                    |                     |       |       |       |       |
|--------------------|---------------------|-------|-------|-------|-------|
| ENSMUSG00000032067 | <i>Pts</i>          | 5.04  | 4.71  | 5.17  | 4.55  |
| ENSMUSG00000032076 | <i>sgigsf</i>       | 3.15  | 2.82  | 3.28  | 2.84  |
| ENSMUSG00000032077 | <i>Bud13</i>        | 1.75  | 1.83  | 1.79  | 1.7   |
| ENSMUSG00000032078 | <i>Zfp259</i>       | 4.6   | 5.28  | 4.9   | 4.68  |
| ENSMUSG00000032079 | <i>Apoa5</i>        | 8.9   | 9.11  | 9.14  | 9.11  |
| ENSMUSG00000032080 | <i>Apoa4</i>        | 9.44  | 10.1  | 9.87  | 9.69  |
| ENSMUSG00000032081 | <i>Apoc3</i>        | 10.59 | 10.16 | 10.61 | 10.67 |
| ENSMUSG00000032083 | <i>Apoa1</i>        | 11.79 | 12.17 | 12.21 | 12.56 |
| ENSMUSG00000032085 | <i>Tagln</i>        | 2.26  | 2.41  | 2.57  | 2.35  |
| ENSMUSG00000032086 | <i>Bace</i>         | 3.78  | 4.06  | 3.71  | 3.44  |
| ENSMUSG00000032092 | <i>Mpzl2</i>        | 6.11  | 5.65  | 6.24  | 5.88  |
| ENSMUSG00000032096 | <i>Arcn1</i>        | 5.97  | 5.59  | 5.43  | 5.08  |
| ENSMUSG00000032097 | <i>Ddx6</i>         | 4.32  | 3.67  | 3.77  | 3.77  |
| ENSMUSG00000032103 | <i>Pus3</i>         | 1.84  | 1.7   | 1.57  | 0.93  |
| ENSMUSG00000032109 | <i>Nlr1</i>         | 1.64  | 2.07  | 1.81  | 1.83  |
| ENSMUSG00000032112 | <i>Trappc4</i>      | 3.68  | 2.89  | 3.17  | 3.24  |
| ENSMUSG00000032114 | <i>Slc37a4</i>      | 7.27  | 7.33  | 7.76  | 7.51  |
| ENSMUSG00000032115 | <i>Hyou1</i>        | 5.57  | 6.61  | 4.78  | 5.45  |
| ENSMUSG00000032116 | <i>Stt3a</i>        | 5.54  | 5.11  | 4.79  | 4.69  |
| ENSMUSG00000032119 | <i>Mizf</i>         | 1.01  | 1.16  | 1.12  | 1.02  |
| ENSMUSG00000032120 | <i>Tmem24</i>       | 4.31  | 5.05  | 4.9   | 4.67  |
| ENSMUSG00000032121 | <i>1810021J13Ri</i> | 2.23  | 1.73  | 2.12  | 2.36  |
| ENSMUSG00000032123 | <i>Dpagt1</i>       | 4.58  | 5.24  | 4.43  | 4.39  |
| ENSMUSG00000032125 | <i>Robo4</i>        | 2.08  | 2.96  | 2.14  | 2.14  |
| ENSMUSG00000032126 | <i>Hmbs</i>         | 4.94  | 4.82  | 4.56  | 4.4   |
| ENSMUSG00000032127 | <i>Vps11</i>        | 3.2   | 3.64  | 3.47  | 3.31  |
| ENSMUSG00000032171 | <i>Pin1</i>         | 3.25  | 4.17  | 3.62  | 3.43  |
| ENSMUSG00000032175 | <i>Tyk2</i>         | 2.53  | 2.88  | 2.41  | 2.2   |
| ENSMUSG00000032178 | <i>Ilf3</i>         | 1.85  | 2.16  | 2.17  | 2.22  |
| ENSMUSG00000032179 | <i>Bmp5</i>         | 2.58  | 1.49  | 1.92  | 1.32  |
| ENSMUSG00000032180 | <i>Tmed1</i>        | 3.62  | 4.13  | 3.79  | 3.73  |

|                    |                 |      |      |      |      |
|--------------------|-----------------|------|------|------|------|
| ENSMUSG00000032182 | <i>Yipf2</i>    | 3.97 | 4.71 | 4.28 | 4.22 |
| ENSMUSG00000032184 | <i>Lysmd2</i>   | 1.4  | 1.7  | 0.42 | 0.34 |
| ENSMUSG00000032185 | <i>Carm1</i>    | 3.88 | 4.58 | 4.4  | 4.39 |
| ENSMUSG00000032187 | <i>Smarca4</i>  | 3.86 | 4.55 | 4.21 | 3.94 |
| ENSMUSG00000032193 | <i>Ldlr</i>     | 4.83 | 5.23 | 5.22 | 5.09 |
| ENSMUSG00000032194 | <i>Ankrd25</i>  | 3.25 | 4.16 | 3.78 | 3.55 |
| ENSMUSG00000032198 | <i>Dock6</i>    | 1.23 | 1.86 | 1.24 | 1.13 |
| ENSMUSG00000032199 | <i>Grin1a</i>   | 5.53 | 5.81 | 5.57 | 5.31 |
| ENSMUSG00000032203 | <i>NA</i>       | 3.93 | 3.61 | 3.72 | 3.58 |
| ENSMUSG00000032204 | <i>Aqp9</i>     | 7.43 | 7.36 | 7.56 | 7.3  |
| ENSMUSG00000032207 | <i>Lipc</i>     | 7.56 | 7.33 | 7.16 | 7.16 |
| ENSMUSG00000032212 | <i>Met</i>      | 3.78 | 3.37 | 3.37 | 3.2  |
| ENSMUSG00000032215 | <i>BC003885</i> | 3.28 | 2.93 | 3.22 | 2.68 |
| ENSMUSG00000032216 | <i>Nedd4</i>    | 6.64 | 6.2  | 6.47 | 6.17 |
| ENSMUSG00000032217 | <i>Arkadia</i>  | 2.74 | 2.17 | 2.65 | 2.38 |
| ENSMUSG00000032220 | <i>Myo1e</i>    | 4.52 | 4.53 | 4.38 | 4.22 |
| ENSMUSG00000032228 | <i>Tcf12</i>    | 3.07 | 2.58 | 2.99 | 2.69 |
| ENSMUSG00000032231 | <i>Anxa2</i>    | 3.42 | 3.59 | 3.05 | 3.11 |
| ENSMUSG00000032232 | <i>Cgn11</i>    | 3.99 | 4.17 | 4.09 | 4.01 |
| ENSMUSG00000032235 | <i>Narg2</i>    | 2.15 | 1.69 | 1.99 | 1.53 |
| ENSMUSG00000032238 | <i>Rora</i>     | 3.93 | 3.7  | 3.25 | 3.16 |
| ENSMUSG00000032239 | <i>rp9</i>      | 5.5  | 5.69 | 5.53 | 5.29 |
| ENSMUSG00000032244 | <i>Fem1b</i>    | 2.92 | 2.64 | 2.64 | 2.31 |
| ENSMUSG00000032245 | <i>Cln6</i>     | 1.24 | 1.95 | 2.14 | 2.26 |
| ENSMUSG00000032249 | <i>Anp32a</i>   | 6.79 | 6.87 | 7.19 | 6.98 |
| ENSMUSG00000032252 | <i>Glce</i>     | 3.31 | 2.81 | 2.91 | 2.55 |
| ENSMUSG00000032253 | <i>Phip</i>     | 1.3  | 0    | 1.2  | 0.3  |
| ENSMUSG00000032261 | <i>Sh3bgrl2</i> | 4.11 | 3.93 | 3.74 | 3.77 |
| ENSMUSG00000032263 | <i>Bckdhb</i>   | 7.16 | 6.48 | 6.66 | 6.4  |
| ENSMUSG00000032264 | <i>Zw10</i>     | 2.74 | 3.09 | 3.04 | 2.61 |
| ENSMUSG00000032265 | <i>NA</i>       | 3.68 | 3.09 | 3.42 | 3.57 |



|                    |                     |      |       |      |      |
|--------------------|---------------------|------|-------|------|------|
| ENSMUSG00000032271 | <i>Nnmt</i>         | 6.61 | 5.78  | 7.58 | 6.79 |
| ENSMUSG00000032279 | <i>Idh3a</i>        | 5.17 | 4.77  | 4.88 | 4.7  |
| ENSMUSG00000032280 | <i>Tle3</i>         | 0.09 | 1.71  | 1.13 | 1.44 |
| ENSMUSG00000032288 | <i>Imp3</i>         | 4.94 | 4.79  | 5.04 | 4.67 |
| ENSMUSG00000032290 | <i>Ptpn9</i>        | 3.5  | 3.61  | 2.62 | 2.65 |
| ENSMUSG00000032293 | <i>Ireb2</i>        | 4.66 | 3.71  | 4.38 | 3.97 |
| ENSMUSG00000032294 | <i>Pkm2</i>         | 1.44 | 1.69  | 1.51 | 1.42 |
| ENSMUSG00000032295 | <i>Man2c1</i>       | 3.12 | 3.58  | 3.12 | 3.15 |
| ENSMUSG00000032298 | <i>Neil1</i>        | 1.7  | 2.14  | 2.13 | 1.43 |
| ENSMUSG00000032299 | <i>Commd4</i>       | 4.32 | 4.72  | 4.43 | 4.15 |
| ENSMUSG00000032300 | <i>14-Sep</i>       | 2.8  | 3.05  | 2.62 | 2.55 |
| ENSMUSG00000032301 | <i>PsmA4</i>        | 5.69 | 5.49  | 5.28 | 4.72 |
| ENSMUSG00000032305 | <i>2310046O06R1</i> | 2.05 | 1.95  | 2.19 | 1.8  |
| ENSMUSG00000032306 | <i>Mpi</i>          | 3.11 | 3.41  | 3.1  | 2.92 |
| ENSMUSG00000032307 | <i>Ube2q2</i>       | 2.72 | 1.92  | 2.54 | 2.1  |
| ENSMUSG00000032308 | <i>NA</i>           | 1.73 | 2.15  | 2.3  | 1.82 |
| ENSMUSG00000032309 | <i>Fbxo22</i>       | 5.6  | 5.21  | 5.46 | 5.1  |
| ENSMUSG00000032310 | <i>Cyp1a2</i>       | 9.15 | 9.24  | 9.44 | 9.25 |
| ENSMUSG00000032311 | <i>Nrg4</i>         | 0.94 | -0.83 | 1.39 | 0.65 |
| ENSMUSG00000032312 | <i>Csk</i>          | 4.78 | 4.99  | 5.18 | 4.96 |
| ENSMUSG00000032314 | <i>EtfA</i>         | 7.26 | 6.64  | 7.22 | 6.73 |
| ENSMUSG00000032316 | <i>Clk3</i>         | 4.24 | 4.27  | 4.13 | 4.08 |
| ENSMUSG00000032320 | <i>Rcn2</i>         | 2.41 | 2.22  | 2.35 | 1.58 |
| ENSMUSG00000032324 | <i>Tspan3</i>       | 2.07 | 2.19  | 2    | 1.57 |
| ENSMUSG00000032328 | <i>Tmem30a</i>      | 6.56 | 5.85  | 5.86 | 5.19 |
| ENSMUSG00000032329 | <i>Hmg20a</i>       | 2.57 | 2.56  | 2.21 | 1.92 |
| ENSMUSG00000032330 | <i>Cox7a2</i>       | 7.18 | 6.8   | 7.37 | 6.94 |
| ENSMUSG00000032336 | <i>Nptn</i>         | 4.92 | 4.17  | 4.71 | 4.51 |
| ENSMUSG00000032340 | <i>Neol</i>         | 2.03 | 1.94  | 2.19 | 1.97 |
| ENSMUSG00000032342 | <i>Mtol</i>         | 3.12 | 3.34  | 3.24 | 3.28 |
| ENSMUSG00000032348 | <i>Gsta4</i>        | 6.86 | 6.07  | 6.6  | 6.26 |

|                    |                     |      |      |      |      |
|--------------------|---------------------|------|------|------|------|
| ENSMUSG00000032349 | <i>Elovl5</i>       | 8.71 | 8.22 | 7.84 | 7.69 |
| ENSMUSG00000032350 | <i>Gclc</i>         | 6.79 | 6.89 | 6.4  | 6.44 |
| ENSMUSG00000032353 | <i>Tmed3</i>        | 3.38 | 4.76 | 3.04 | 3.57 |
| ENSMUSG00000032359 | <i>Ctsh</i>         | 8.01 | 7.46 | 7.72 | 7.64 |
| ENSMUSG00000032363 | <i>Adamts7</i>      | 0.47 | 2.28 | 1.22 | 1.58 |
| ENSMUSG00000032366 | <i>Perq1</i>        | 3.1  | 2.83 | 3.32 | 3.14 |
| ENSMUSG00000032369 | <i>Plscr1</i>       | 1.94 | 1.5  | 2.46 | 2.71 |
| ENSMUSG00000032370 | <i>Lactb</i>        | 4.92 | 4.28 | 4.62 | 4.21 |
| ENSMUSG00000032372 | <i>Plscr2</i>       | 5.1  | 4.17 | 5.15 | 4.72 |
| ENSMUSG00000032376 | <i>Usp3</i>         | 4.26 | 3.62 | 4.09 | 3.6  |
| ENSMUSG00000032380 | <i>DAPK2</i>        | 2.52 | 3.56 | 3.34 | 3.5  |
| ENSMUSG00000032381 | <i>5730536A07Ri</i> | 5.71 | 5.06 | 5.38 | 5.1  |
| ENSMUSG00000032382 | <i>Snx1</i>         | 3.3  | 3.34 | 3.36 | 3.08 |
| ENSMUSG00000032383 | <i>Ppib</i>         | 7.83 | 7.93 | 7.7  | 7.48 |
| ENSMUSG00000032386 | <i>Trip4</i>        | 3.74 | 2.92 | 3.78 | 3.28 |
| ENSMUSG00000032387 | <i>Rbpms2</i>       | 4.91 | 5.04 | 5.23 | 5.13 |
| ENSMUSG00000032388 | <i>Spg21</i>        | 4.21 | 3.25 | 3.7  | 3.5  |
| ENSMUSG00000032392 | <i>Parp16</i>       | 3.31 | 3.33 | 3.59 | 3.27 |
| ENSMUSG00000032393 | <i>Dpp8</i>         | 4.53 | 4.12 | 4.19 | 3.92 |
| ENSMUSG00000032396 | <i>Dis3l</i>        | 3.41 | 3.43 | 3.34 | 3.26 |
| ENSMUSG00000032397 | <i>Tipin</i>        | 2.21 | 1.18 | 1.66 | 1.16 |
| ENSMUSG00000032398 | <i>Snpc5</i>        | 4.73 | 4.18 | 4.88 | 4.45 |
| ENSMUSG00000032399 | <i>Rpl4</i>         | 7.71 | 7.81 | 7.68 | 7.63 |
| ENSMUSG00000032402 | <i>Smad3</i>        | 2.14 | 3    | 2.52 | 2.62 |
| ENSMUSG00000032403 | <i>NA</i>           | 3.51 | 3.53 | 4.08 | 3.58 |
| ENSMUSG00000032405 | <i>Pias1</i>        | 2.95 | 2.76 | 2.84 | 2.84 |
| ENSMUSG00000032407 | <i>2610101N10Ri</i> | 3.69 | 2.85 | 3    | 2.41 |
| ENSMUSG00000032409 | <i>NA</i>           | 1.18 | 0.48 | 1.02 | 0.35 |
| ENSMUSG00000032410 | <i>Xrn1</i>         | 1.25 | 0.59 | 0.94 | 0.38 |
| ENSMUSG00000032411 | <i>Tfdp2</i>        | 3.51 | 2.07 | 3.13 | 2.65 |
| ENSMUSG00000032412 | <i>Atp1b3</i>       | 4.24 | 3.52 | 4.05 | 3.6  |

|                    |                      |      |       |      |      |
|--------------------|----------------------|------|-------|------|------|
| ENSMUSG00000032415 | <i>2610018I03Rik</i> | 0.92 | -0.08 | 1.01 | 1.16 |
| ENSMUSG00000032418 | <i>Mod1</i>          | 3.77 | 2.45  | 3.2  | 2.8  |
| ENSMUSG00000032420 | <i>Nt5e</i>          | 5.95 | 5.33  | 4.93 | 4.59 |
| ENSMUSG00000032422 | <i>Snx14</i>         | 3.74 | 2.74  | 3.58 | 3.01 |
| ENSMUSG00000032423 | <i>Syncrip</i>       | 3.34 | 2.44  | 2.91 | 2.37 |
| ENSMUSG00000032424 | <i>NA</i>            | 2.13 | 1.17  | 2.7  | 1.83 |
| ENSMUSG00000032425 | <i>NA</i>            | 1.6  | 1.29  | 1.4  | 1.29 |
| ENSMUSG00000032431 | <i>Crtap</i>         | 3.12 | 3.49  | 2.51 | 2.8  |
| ENSMUSG00000032434 | <i>Cmtm6</i>         | 5.46 | 5.95  | 5.23 | 4.94 |
| ENSMUSG00000032435 | <i>Dync1li1</i>      | 3.65 | 3.21  | 3.57 | 3.1  |
| ENSMUSG00000032437 | <i>Stt3b</i>         | 5.11 | 5.03  | 4.75 | 4.46 |
| ENSMUSG00000032438 | <i>NA</i>            | 0.28 | 2.45  | 1.9  | 1.78 |
| ENSMUSG00000032440 | <i>Tgfbr2</i>        | 1.75 | 1.77  | 2.1  | 1.7  |
| ENSMUSG00000032456 | <i>Nmnat3</i>        | 1.18 | 0.76  | 1.72 | 1.21 |
| ENSMUSG00000032458 | <i>Copb2</i>         | 6.1  | 5.67  | 5.88 | 5.66 |
| ENSMUSG00000032459 | <i>Mrps22</i>        | 4.4  | 4.31  | 4.06 | 3.82 |
| ENSMUSG00000032462 | <i>Pik3cb</i>        | 2.7  | 2     | 2.91 | 2.4  |
| ENSMUSG00000032463 | <i>Faim</i>          | 2.61 | 1.84  | 2.24 | 1.56 |
| ENSMUSG00000032468 | <i>Armc8</i>         | 1.96 | 2.18  | 2.32 | 2.24 |
| ENSMUSG00000032469 | <i>Dbr1</i>          | 2.64 | 2.08  | 2.1  | 1.87 |
| ENSMUSG00000032470 | <i>Mras</i>          | 0.48 | 1.1   | 1    | 0.61 |
| ENSMUSG00000032475 | <i>Nck1</i>          | 2.85 | 1.69  | 2.27 | 2.13 |
| ENSMUSG00000032478 | <i>Nme6</i>          | 2.75 | 3.16  | 3.11 | 3    |
| ENSMUSG00000032479 | <i>Mtap4</i>         | 3.51 | 3.39  | 3.3  | 3.14 |
| ENSMUSG00000032480 | <i>Dhx30</i>         | 2.95 | 3.85  | 3.23 | 3.17 |
| ENSMUSG00000032481 | <i>Smarcc1</i>       | 2.65 | 2.34  | 2.53 | 2.1  |
| ENSMUSG00000032485 | <i>Scap</i>          | 5.55 | 6.27  | 5.83 | 5.79 |
| ENSMUSG00000032492 | <i>Pthr1</i>         | 2.47 | 3.49  | 2.62 | 2.65 |
| ENSMUSG00000032497 | <i>Lrrfip2</i>       | 3    | 3.09  | 3.3  | 2.92 |
| ENSMUSG00000032498 | <i>Mlh1</i>          | 0.6  | 0.39  | 1.56 | 0.1  |
| ENSMUSG00000032500 | <i>Dclk3</i>         | 1.77 | 2.63  | 2.58 | 2.64 |

|                    |                      |       |       |       |       |
|--------------------|----------------------|-------|-------|-------|-------|
| ENSMUSG00000032501 | <i>Trib1</i>         | 3.39  | 3.37  | 3.49  | 3.38  |
| ENSMUSG00000032504 | <i>Pdcd6ip</i>       | 5.58  | 5.48  | 5.71  | 5.41  |
| ENSMUSG00000032507 | <i>Fbxl2</i>         | 0.92  | 0.22  | 1.09  | 0.19  |
| ENSMUSG00000032508 | <i>Myd88</i>         | 3.77  | 3.51  | 3.41  | 3.34  |
| ENSMUSG00000032512 | <i>Wdr48</i>         | 4.26  | 3.53  | 3.88  | 3.58  |
| ENSMUSG00000032513 | <i>Gorasp1</i>       | 4.14  | 4.5   | 4.24  | 4.16  |
| ENSMUSG00000032515 | <i>Axud1</i>         | 1.72  | 2.41  | 1.92  | 1.74  |
| ENSMUSG00000032519 | <i>Slc25a38</i>      | 4.22  | 4.77  | 4.22  | 4.05  |
| ENSMUSG00000032525 | <i>Nktr</i>          | 3.07  | 3.23  | 2.89  | 2.73  |
| ENSMUSG00000032526 | <i>Deb1</i>          | 5.24  | 4.75  | 5.49  | 5.37  |
| ENSMUSG00000032527 | <i>Pccb</i>          | 7.09  | 6.87  | 6.85  | 6.56  |
| ENSMUSG00000032528 | <i>Vipr1</i>         | 3.73  | 4.11  | 3.9   | 3.57  |
| ENSMUSG00000032531 | <i>Amotl2</i>        | 3.74  | 4.2   | 3.4   | 3.45  |
| ENSMUSG00000032534 | <i>Cep63</i>         | 2.6   | 2.37  | 2.23  | 2.15  |
| ENSMUSG00000032536 | <i>Trak1</i>         | 4.02  | 4.15  | 3.79  | 3.75  |
| ENSMUSG00000032540 | <i>Abhd5</i>         | 4.29  | 4.84  | 4.21  | 4.18  |
| ENSMUSG00000032547 | <i>Ryk</i>           | 4.57  | 4.31  | 4.36  | 4.24  |
| ENSMUSG00000032548 | <i>Slco2a1</i>       | 4.39  | 5.34  | 4.65  | 4.35  |
| ENSMUSG00000032551 | <i>I1110059G10Ri</i> | 3.31  | 2.97  | 3.21  | 2.91  |
| ENSMUSG00000032553 | <i>Srprb</i>         | 3.66  | 4.55  | 3.57  | 3.91  |
| ENSMUSG00000032554 | <i>Trf</i>           | 12.38 | 12.65 | 12.37 | 12.45 |
| ENSMUSG00000032555 | <i>Topbp1</i>        | 1.94  | 1.46  | 2.14  | 1.37  |
| ENSMUSG00000032557 | <i>Ube1dc1</i>       | 4.61  | 4.44  | 3.81  | 3.86  |
| ENSMUSG00000032558 | <i>Nphp3</i>         | 6.17  | 5.92  | 5.97  | 5.74  |
| ENSMUSG00000032560 | <i>NA</i>            | 3.78  | 3.16  | 3.43  | 3.06  |
| ENSMUSG00000032562 | <i>Gnai2</i>         | 6.04  | 6.48  | 6.15  | 6.09  |
| ENSMUSG00000032563 | <i>Mrpl3</i>         | 3.86  | 4.16  | 4.27  | 3.74  |
| ENSMUSG00000032565 | <i>Nudt16</i>        | 2.95  | 2.97  | 3.29  | 2.95  |
| ENSMUSG00000032567 | <i>Aste1</i>         | 1.34  | 0.7   | 1.63  | 1.33  |
| ENSMUSG00000032570 | <i>Atp2c1</i>        | 3.97  | 3.53  | 3.72  | 3.34  |
| ENSMUSG00000032571 | <i>Pik3r4</i>        | 2.25  | 2.55  | 2.6   | 2.43  |

|                    |                     |       |       |      |       |
|--------------------|---------------------|-------|-------|------|-------|
| ENSMUSG00000032575 | <i>Armet</i>        | 6.21  | 7.4   | 5.32 | 6.2   |
| ENSMUSG00000032578 | <i>Cish</i>         | 3.88  | 1.33  | -0.2 | 1.36  |
| ENSMUSG00000032579 | <i>Hemkl</i>        | 3.48  | 4.03  | 3.33 | 3.32  |
| ENSMUSG00000032580 | <i>Rbm5</i>         | 3.97  | 3.95  | 3.62 | 3.44  |
| ENSMUSG00000032582 | <i>Rbm6</i>         | 2.29  | 2.28  | 2.2  | 1.86  |
| ENSMUSG00000032583 | <i>Mon1a</i>        | 3.37  | 3.82  | 3.51 | 3.45  |
| ENSMUSG00000032590 | <i>Apeh</i>         | 4.74  | 5.42  | 4.99 | 5.03  |
| ENSMUSG00000032591 | <i>Mst1</i>         | 6.7   | 7.17  | 6.59 | 6.6   |
| ENSMUSG00000032594 | <i>Ihpk1</i>        | 4.56  | 4.48  | 4.63 | 4.46  |
| ENSMUSG00000032596 | <i>AK157941</i>     | 2.45  | 2.3   | 2.02 | 1.73  |
| ENSMUSG00000032598 | <i>Nckipsd</i>      | 1.27  | 1.86  | 1.21 | 1.08  |
| ENSMUSG00000032599 | <i>AK057615</i>     | 4.03  | 4.07  | 4.8  | 4.5   |
| ENSMUSG00000032601 | <i>Prkar2a</i>      | 5.42  | 5.17  | 5.06 | 4.81  |
| ENSMUSG00000032602 | <i>Slc25a20</i>     | 6.73  | 6.73  | 6.76 | 6.69  |
| ENSMUSG00000032604 | <i>Qars</i>         | 4.59  | 4.55  | 4.67 | 4.38  |
| ENSMUSG00000032606 | <i>Nicn1</i>        | 3.91  | 3.88  | 3.73 | 3.54  |
| ENSMUSG00000032607 | <i>Amt</i>          | 5.78  | 5.97  | 5.56 | 5.1   |
| ENSMUSG00000032612 | <i>mKIAA4155</i>    | 5.06  | 5.3   | 4.98 | 4.94  |
| ENSMUSG00000032615 | <i>Nt5m</i>         | 2.67  | 3.1   | 3.3  | 3.15  |
| ENSMUSG00000032621 | <i>Sfrs12</i>       | 2.93  | 2.15  | 2.57 | 2.3   |
| ENSMUSG00000032624 | <i>Eml4</i>         | 2.67  | 2.22  | 2.33 | 2.12  |
| ENSMUSG00000032633 | <i>Flcn</i>         | 3.72  | 3.68  | 4.29 | 3.75  |
| ENSMUSG00000032637 | <i>Atxn2l</i>       | 3.79  | 4.24  | 4.52 | 4.29  |
| ENSMUSG00000032648 | <i>Pygm</i>         | -1.19 | -0.14 | 1.09 | 1.28  |
| ENSMUSG00000032652 | <i>Crebl2</i>       | 5.17  | 4.83  | 4.8  | 4.34  |
| ENSMUSG00000032667 | <i>Pon2</i>         | 5.41  | 5.25  | 5.14 | 4.92  |
| ENSMUSG00000032673 | <i>2010316F05Ri</i> | 4.33  | 3.22  | 4.4  | 4.13  |
| ENSMUSG00000032679 | <i>Cd59a</i>        | 4.62  | 5.57  | 4.62 | 5.3   |
| ENSMUSG00000032688 | <i>Malt1</i>        | 1.12  | 0.41  | 1.22 | -0.05 |
| ENSMUSG00000032698 | <i>Lmo2</i>         | 1.77  | 2.2   | 2.61 | 1.66  |
| ENSMUSG00000032702 | <i>Ankrd15</i>      | 3.47  | 4.2   | 3.67 | 3.44  |

|                    |                        |      |      |      |      |
|--------------------|------------------------|------|------|------|------|
| ENSMUSG00000032705 | <i>Exdl2</i>           | 2.6  | 2.55 | 2.47 | 1.96 |
| ENSMUSG00000032712 | <i>2810474O19R</i>     | 2.73 | 2.19 | 2.47 | 1.96 |
| ENSMUSG00000032714 | <i>NA</i>              | 1.1  | 1.46 | 1.15 | 0.74 |
| ENSMUSG00000032715 | <i>Trib3</i>           | 2.46 | 3.15 | 3.15 | 2.53 |
| ENSMUSG00000032724 | <i>Abtb2</i>           | 2.16 | 3.09 | 2.92 | 2.62 |
| ENSMUSG00000032725 | <i>Folr2</i>           | 3.46 | 2.94 | 2.52 | 2.86 |
| ENSMUSG00000032727 | <i>Mier3</i>           | 2.51 | 1.4  | 2.12 | 1.62 |
| ENSMUSG00000032733 | <i>Sh3px3</i>          | 3.19 | 3.31 | 2.97 | 2.76 |
| ENSMUSG00000032735 | <i>Ablim3</i>          | 3.87 | 4.61 | 3.43 | 3.47 |
| ENSMUSG00000032737 | <i>Inpp1</i>           | 3.5  | 3.7  | 3.83 | 3.36 |
| ENSMUSG00000032741 | <i>calcium channel</i> | 4.39 | 4.91 | 4.6  | 4.51 |
| ENSMUSG00000032743 | <i>D430042O09R</i>     | 1.93 | 2.27 | 2.19 | 1.88 |
| ENSMUSG00000032745 | <i>GPBP</i>            | 4.71 | 3.78 | 4.39 | 3.76 |
| ENSMUSG00000032754 | <i>Slc24a6</i>         | 4.44 | 4.88 | 4.81 | 4.36 |
| ENSMUSG00000032757 | <i>Bet1</i>            | 5.15 | 4.29 | 4.59 | 4.1  |
| ENSMUSG00000032763 | <i>Ilvbl</i>           | 4.09 | 4.28 | 4.12 | 3.83 |
| ENSMUSG00000032766 | <i>Gng11</i>           | 4.39 | 3.1  | 3.44 | 2.98 |
| ENSMUSG00000032776 | <i>Mctp2</i>           | 1.87 | 1.13 | 1.81 | 1.27 |
| ENSMUSG00000032777 | <i>Gtf3c1</i>          | 3.24 | 3.68 | 3.55 | 3.39 |
| ENSMUSG00000032786 | <i>Alas1</i>           | 7.26 | 6.06 | 6.61 | 7.3  |
| ENSMUSG00000032788 | <i>Pdxk</i>            | 3.65 | 3.48 | 4.28 | 3.93 |
| ENSMUSG00000032802 | <i>Srxn1</i>           | 4.23 | 4.57 | 4.32 | 3.91 |
| ENSMUSG00000032803 | <i>AK048941</i>        | 3.92 | 3.34 | 3.65 | 3.24 |
| ENSMUSG00000032806 | <i>Slc10a3</i>         | 1.65 | 1.59 | 1.6  | 1.46 |
| ENSMUSG00000032808 | <i>Cyp2c38</i>         | 7.22 | 6.42 | 7.07 | 6.66 |
| ENSMUSG00000032812 | <i>Centd2</i>          | 3.19 | 3.4  | 3.28 | 2.93 |
| ENSMUSG00000032834 | <i>Pwp2</i>            | 2.33 | 3    | 2.26 | 2.1  |
| ENSMUSG00000032840 | <i>2410131K14R</i>     | 2.68 | 2.9  | 2.82 | 2.86 |
| ENSMUSG00000032842 | <i>Abcc10</i>          | 0.62 | 1.26 | 1.23 | 0.62 |
| ENSMUSG00000032855 | <i>Pkd1</i>            | 1.35 | 1.69 | 1.57 | 1.19 |
| ENSMUSG00000032860 | <i>P2ry2</i>           | 2.46 | 3.1  | 2.98 | 3.14 |

|                    |                     |       |       |       |       |
|--------------------|---------------------|-------|-------|-------|-------|
| ENSMUSG00000032867 | <i>Fbxw8</i>        | 4.56  | 5.27  | 4.78  | 4.61  |
| ENSMUSG00000032869 | <i>Psmf1</i>        | 4.04  | 3.96  | 3.99  | 3.65  |
| ENSMUSG00000032870 | <i>Smap1l</i>       | 5.07  | 5.21  | 5.14  | 4.98  |
| ENSMUSG00000032872 | <i>Cyb5r4</i>       | 1.15  | 0.93  | 1.57  | 0.98  |
| ENSMUSG00000032883 | <i>Acs13</i>        | 1.69  | 1.29  | 1.75  | 1.52  |
| ENSMUSG00000032897 | <i>Nfyc</i>         | 1.08  | 0.62  | 0.88  | 1.12  |
| ENSMUSG00000032898 | <i>Fbxo21</i>       | 4.73  | 5.54  | 5.75  | 5.5   |
| ENSMUSG00000032902 | <i>Slc16a1</i>      | 4.85  | 4.38  | 4.13  | 3.8   |
| ENSMUSG00000032905 | <i>Atg12</i>        | 3.75  | 3.34  | 4.1   | 3.62  |
| ENSMUSG00000032913 | <i>mKIAA0806</i>    | 1.06  | 0.48  | 0.71  | -0.08 |
| ENSMUSG00000032915 | <i>Emr4</i>         | 1.79  | 0.87  | 0.93  | 0.91  |
| ENSMUSG00000032932 | <i>Stch</i>         | 4.27  | 3.46  | 3.24  | 3.09  |
| ENSMUSG00000032939 | <i>Nup93</i>        | 0.9   | 1.32  | 1.26  | 1.08  |
| ENSMUSG00000032946 | <i>Rasgrp2</i>      | 1.14  | 1.66  | 1.72  | 1.44  |
| ENSMUSG00000032952 | <i>Ap4b1</i>        | 3.38  | 3.46  | 3.44  | 3.36  |
| ENSMUSG00000032959 | <i>Pebp1</i>        | 5.01  | 5.12  | 5.2   | 5.06  |
| ENSMUSG00000032965 | <i>Ift57</i>        | 1.41  | 1.22  | 1.48  | 0.84  |
| ENSMUSG00000032966 | <i>FKBP12-T1</i>    | 5.43  | 5.49  | 5.33  | 5.13  |
| ENSMUSG00000032977 | <i>I810008A18Ri</i> | 3.88  | 4.41  | 4.26  | 4.1   |
| ENSMUSG00000032998 | <i>Foxj3</i>        | 2.2   | 1.57  | 1.92  | 1.81  |
| ENSMUSG00000033004 | <i>Phr1</i>         | 1.98  | 1.72  | 1.94  | 1.45  |
| ENSMUSG00000033009 | <i>mKIAA1612</i>    | 2.42  | 2.45  | 2.34  | 2.33  |
| ENSMUSG00000033014 | <i>Trim33</i>       | 2.08  | 1.49  | 2.02  | 1.63  |
| ENSMUSG00000033016 | <i>Nfatc1</i>       | 1.65  | 1.79  | 2.03  | 1.73  |
| ENSMUSG00000033020 | <i>Polr2f</i>       | 5.3   | 5.57  | 5.22  | 5.43  |
| ENSMUSG00000033021 | <i>Gmppa</i>        | 3.65  | 4.21  | 3.55  | 3.42  |
| ENSMUSG00000033022 | <i>Cdo1</i>         | 10.26 | 10.27 | 10.25 | 9.93  |
| ENSMUSG00000033029 | <i>I700088E04Ri</i> | 2.03  | 2.04  | 2.12  | 1.76  |
| ENSMUSG00000033032 | <i>Afap1ll</i>      | 1.59  | 1.56  | 0.41  | 0.56  |
| ENSMUSG00000033039 | <i>NA</i>           | 1.62  | 1.9   | 1.96  | 1.63  |
| ENSMUSG00000033047 | <i>Eif3eip</i>      | 6.17  | 6.19  | 5.91  | 5.8   |

|                    |                     |      |      |      |      |
|--------------------|---------------------|------|------|------|------|
| ENSMUSG00000033054 | <i>Npat</i>         | 1.36 | 0.37 | 1.13 | 0.5  |
| ENSMUSG00000033055 | <i>Ankrd54</i>      | 2.25 | 3.01 | 2.4  | 2.55 |
| ENSMUSG00000033059 | <i>Pygb</i>         | 1.05 | 1.1  | 0.93 | 0.91 |
| ENSMUSG00000033060 | <i>Lmo7</i>         | 2.25 | 2.03 | 2.68 | 2.33 |
| ENSMUSG00000033065 | <i>Pfkm</i>         | 2.42 | 3.05 | 3.34 | 3.03 |
| ENSMUSG00000033068 | <i>Entpd6</i>       | 2.68 | 3.12 | 2.58 | 2.27 |
| ENSMUSG00000033075 | <i>Senp1</i>        | 1.55 | 1.08 | 1.33 | 1.19 |
| ENSMUSG00000033088 | <i>Triobp</i>       | 1.69 | 2.28 | 2.14 | 1.92 |
| ENSMUSG00000033096 | <i>2310001A20Ri</i> | 4.87 | 4.58 | 4.75 | 4.47 |
| ENSMUSG00000033099 | <i>Nol12</i>        | 3.08 | 4.24 | 3.51 | 3.45 |
| ENSMUSG00000033102 | <i>Cdc14b</i>       | 3.17 | 2.29 | 3.07 | 2.1  |
| ENSMUSG00000033105 | <i>Lss</i>          | 3.37 | 3.67 | 2.88 | 2.75 |
| ENSMUSG00000033106 | <i>Slc7a6os</i>     | 3.92 | 3.55 | 3.66 | 3.51 |
| ENSMUSG00000033107 | <i>Rnf125</i>       | 4.43 | 4.11 | 3.55 | 3.02 |
| ENSMUSG00000033111 | <i>3830406C13Ri</i> | 3.37 | 2.58 | 3.36 | 2.79 |
| ENSMUSG00000033114 | <i>Slc35d2</i>      | 4.89 | 4.51 | 4.58 | 4.47 |
| ENSMUSG00000033124 | <i>Atg9a</i>        | 4.78 | 5.41 | 5.13 | 5.07 |
| ENSMUSG00000033128 | <i>Ggal</i>         | 3.65 | 4.76 | 4.46 | 4.43 |
| ENSMUSG00000033147 | <i>NA</i>           | 1.22 | 1.43 | 1.73 | 0.98 |
| ENSMUSG00000033149 | <i>Phldb2</i>       | 2.84 | 2.22 | 2.61 | 2.42 |
| ENSMUSG00000033157 | <i>Abhd10</i>       | 1.34 | 0.77 | 1.42 | 1.26 |
| ENSMUSG00000033159 | <i>1810031K17Ri</i> | 4.69 | 4.91 | 5.5  | 5.13 |
| ENSMUSG00000033161 | <i>Atp1a1</i>       | 7.35 | 7.34 | 7.74 | 7.6  |
| ENSMUSG00000033166 | <i>Dis3</i>         | 2.02 | 1.98 | 1.91 | 1.06 |
| ENSMUSG00000033170 | <i>Card10</i>       | 1.66 | 2.83 | 2.55 | 2.46 |
| ENSMUSG00000033174 | <i>Mgll</i>         | 6.68 | 6.64 | 6.65 | 6.32 |
| ENSMUSG00000033184 | <i>NA</i>           | 6.21 | 5.68 | 5.59 | 5.37 |
| ENSMUSG00000033186 | <i>2410129H14Ri</i> | 3.99 | 1.89 | 3.32 | 3.11 |
| ENSMUSG00000033191 | <i>Tiel</i>         | 2.09 | 2.95 | 2.49 | 2.67 |
| ENSMUSG00000033216 | <i>Eefsec</i>       | 4.5  | 4.82 | 4.59 | 4.25 |
| ENSMUSG00000033220 | <i>Rac2</i>         | 2.53 | 2.65 | 3.19 | 1.9  |



|                    |                    |      |       |      |      |
|--------------------|--------------------|------|-------|------|------|
| ENSMUSG00000033228 | <i>Sfrs2ip</i>     | 3.8  | 3.48  | 3.75 | 3.39 |
| ENSMUSG00000033237 | <i>Arid2</i>       | 2.18 | 1.96  | 2.35 | 1.91 |
| ENSMUSG00000033249 | <i>Hsf4</i>        | 1.61 | 2.1   | 2.46 | 2.4  |
| ENSMUSG00000033253 | <i>NA</i>          | 0.85 | 1.54  | 1.13 | 0.96 |
| ENSMUSG00000033256 | <i>Shf</i>         | 1.34 | 2.28  | 2.59 | 1.93 |
| ENSMUSG00000033257 | <i>Till4</i>       | 1.82 | 1.46  | 1.52 | 1.28 |
| ENSMUSG00000033272 | <i>Slc35a4</i>     | 3.04 | 3.13  | 2.92 | 2.96 |
| ENSMUSG00000033285 | <i>Wdr3</i>        | 2.65 | 2.53  | 2.31 | 2.35 |
| ENSMUSG00000033294 | <i>Noc4l</i>       | 2.61 | 3.75  | 3.21 | 3.33 |
| ENSMUSG00000033295 | <i>Ptprf</i>       | 5.2  | 5.81  | 5    | 4.93 |
| ENSMUSG00000033306 | <i>Lpp</i>         | 2.02 | 1.37  | 1.25 | 0.82 |
| ENSMUSG00000033307 | <i>Mif</i>         | 2.93 | 4.04  | 3.58 | 3.68 |
| ENSMUSG00000033308 | <i>Dpyd</i>        | 7.74 | 6.96  | 7.46 | 7.06 |
| ENSMUSG00000033313 | <i>Fbxl8</i>       | 0.76 | 1.65  | 1.02 | 0.54 |
| ENSMUSG00000033318 | <i>Gstt2</i>       | 5.74 | 6.47  | 6.58 | 6.56 |
| ENSMUSG00000033319 | <i>Fem1c</i>       | 3.11 | 2.46  | 2.39 | 2.18 |
| ENSMUSG00000033323 | <i>Ctdp1</i>       | 2.25 | 2.28  | 2.07 | 2    |
| ENSMUSG00000033326 | <i>Jmjd2a</i>      | 2.68 | 3.16  | 2.71 | 2.35 |
| ENSMUSG00000033335 | <i>Dnm2</i>        | 4.01 | 4.7   | 4.4  | 4.36 |
| ENSMUSG00000033352 | <i>Map2k4</i>      | 4.82 | 4.31  | 4.69 | 4.35 |
| ENSMUSG00000033355 | <i>Rtp4</i>        | 4.38 | 3.61  | 3.74 | 4.13 |
| ENSMUSG00000033365 | <i>Ipo13</i>       | 2.71 | 3.67  | 3.08 | 2.95 |
| ENSMUSG00000033373 | <i>Fntb</i>        | 1.2  | 2.05  | 1.71 | 1.19 |
| ENSMUSG00000033377 | <i>Palmd</i>       | 4.43 | 4.09  | 4.1  | 3.69 |
| ENSMUSG00000033379 | <i>Atp6v0b</i>     | 5.83 | 5.81  | 6.15 | 6.24 |
| ENSMUSG00000033382 | <i>D030074E01R</i> | 4.29 | 3.78  | 4.04 | 3.41 |
| ENSMUSG00000033386 | <i>Frrs1</i>       | 3.2  | 3.27  | 3.42 | 3.1  |
| ENSMUSG00000033392 | <i>Clasp2</i>      | 1.68 | 1.32  | 1.85 | 1.39 |
| ENSMUSG00000033395 | <i>Churc1</i>      | 5.42 | 5.33  | 5.21 | 5.36 |
| ENSMUSG00000033400 | <i>Agl</i>         | 3.51 | 3     | 3.14 | 2.89 |
| ENSMUSG00000033411 | <i>Ctdspl2</i>     | 1.28 | -0.08 | 0.91 | 0.64 |

|                    |                     |      |      |      |      |
|--------------------|---------------------|------|------|------|------|
| ENSMUSG00000033416 | <i>I110038D17Ri</i> | 6.73 | 7.15 | 6.5  | 6.26 |
| ENSMUSG00000033417 | <i>2700078E11Ri</i> | 3.83 | 3.39 | 3.59 | 3.27 |
| ENSMUSG00000033423 | <i>Prnpip1</i>      | 4.52 | 5.06 | 4.62 | 4.59 |
| ENSMUSG00000033427 | <i>Upb1</i>         | 6.81 | 6.94 | 6.92 | 6.72 |
| ENSMUSG00000033429 | <i>Mcee</i>         | 6.03 | 5.98 | 6.32 | 6.07 |
| ENSMUSG00000033430 | <i>Terf2ip</i>      | 3.55 | 3.34 | 3.04 | 3.09 |
| ENSMUSG00000033434 | <i>Gtpbp6</i>       | 1.93 | 2.86 | 1.84 | 2.19 |
| ENSMUSG00000033444 | <i>mKIAA0376</i>    | 2.65 | 2.61 | 2.4  | 2.28 |
| ENSMUSG00000033446 | <i>P2ry5</i>        | 3.83 | 2.82 | 2.87 | 2.5  |
| ENSMUSG00000033454 | <i>Zbtb1</i>        | 1.79 | 1.33 | 1.5  | 1.1  |
| ENSMUSG00000033475 | <i>I110002E23Ri</i> | 6.29 | 6.95 | 7.01 | 6.71 |
| ENSMUSG00000033478 | <i>AI450540</i>     | 3.38 | 3.76 | 3.81 | 3.89 |
| ENSMUSG00000033487 | <i>Fndc3a</i>       | 4.61 | 4.05 | 4.13 | 3.81 |
| ENSMUSG00000033488 | <i>BC026585</i>     | 4.42 | 4.58 | 4.28 | 3.98 |
| ENSMUSG00000033499 | <i>Larp5</i>        | 4.87 | 4.59 | 4.77 | 4.7  |
| ENSMUSG00000033530 | <i>NA</i>           | 3.15 | 3.28 | 3.41 | 3.23 |
| ENSMUSG00000033533 | <i>Acsml</i>        | 7.97 | 8.02 | 7.94 | 7.64 |
| ENSMUSG00000033540 | <i>Idua</i>         | 2.58 | 2.94 | 2.77 | 2.7  |
| ENSMUSG00000033542 | <i>NA</i>           | 2.93 | 3.39 | 3.02 | 2.55 |
| ENSMUSG00000033543 | <i>Gtf2a2</i>       | 3.16 | 2.18 | 3.75 | 3.75 |
| ENSMUSG00000033545 | <i>Znrf1</i>        | 2.82 | 2.92 | 3.09 | 2.82 |
| ENSMUSG00000033554 | <i>Dph5</i>         | 2.08 | 1.98 | 1.78 | 1.54 |
| ENSMUSG00000033557 | <i>C530043G21R</i>  | 3.77 | 3.54 | 3.5  | 3.15 |
| ENSMUSG00000033565 | <i>Rbm9</i>         | 2.5  | 2.2  | 2.49 | 2.25 |
| ENSMUSG00000033577 | <i>Myo6</i>         | 3.17 | 2.28 | 3.15 | 2.65 |
| ENSMUSG00000033589 | <i>Reep4</i>        | 2.35 | 2.62 | 2.85 | 2.35 |
| ENSMUSG00000033594 | <i>Spata2L</i>      | 5.06 | 5.36 | 5.75 | 5.13 |
| ENSMUSG00000033596 | <i>Rfwd3</i>        | 1.78 | 1.42 | 1.83 | 1.08 |
| ENSMUSG00000033610 | <i>Pank1</i>        | 7.51 | 6.35 | 7.26 | 6.55 |
| ENSMUSG00000033618 | <i>Map3k13</i>      | 1.59 | 0.83 | 1.03 | 0.7  |
| ENSMUSG00000033623 | <i>Pcgf3</i>        | 2.68 | 2.27 | 2.67 | 2.53 |

|                    |                     |      |      |      |      |
|--------------------|---------------------|------|------|------|------|
| ENSMUSG00000033624 | <i>4930402E16Ri</i> | 3.28 | 2.5  | 3.01 | 2.51 |
| ENSMUSG00000033628 | <i>Pik3c3</i>       | 3.12 | 2.8  | 3.15 | 2.7  |
| ENSMUSG00000033629 | <i>Ptplad1</i>      | 6.54 | 6.27 | 6.37 | 5.94 |
| ENSMUSG00000033634 | <i>Cml2</i>         | 8.05 | 8.22 | 7.99 | 7.93 |
| ENSMUSG00000033653 | <i>Vps8</i>         | 0.84 | 0.93 | 1.02 | 0.77 |
| ENSMUSG00000033658 | <i>Ddx19b</i>       | 1.97 | 1.6  | 1.07 | 1.38 |
| ENSMUSG00000033671 | <i>NA</i>           | 2.98 | 2.5  | 2.83 | 2.42 |
| ENSMUSG00000033684 | <i>Qsox1</i>        | 7.18 | 7.84 | 7.29 | 7.22 |
| ENSMUSG00000033685 | <i>Ucp2</i>         | 5.14 | 5.2  | 5.09 | 4.66 |
| ENSMUSG00000033688 | <i>1300017J02Ri</i> | 8.29 | 8.36 | 8.22 | 8.18 |
| ENSMUSG00000033701 | <i>Acbd6</i>        | 3.84 | 4.21 | 4.18 | 4.18 |
| ENSMUSG00000033703 | <i>Fuk</i>          | 0.98 | 1.9  | 1.53 | 1.51 |
| ENSMUSG00000033706 | <i>Smyd5</i>        | 2.72 | 3.68 | 2.69 | 2.68 |
| ENSMUSG00000033712 | <i>NA</i>           | 2.52 | 2.8  | 2.81 | 2.56 |
| ENSMUSG00000033713 | <i>Foxn3</i>        | 2.96 | 2.41 | 3.01 | 2.69 |
| ENSMUSG00000033715 | <i>Akr1c14</i>      | 7.43 | 6.55 | 7.13 | 6.91 |
| ENSMUSG00000033720 | <i>Sfxn5</i>        | 3    | 2.54 | 3.44 | 2.93 |
| ENSMUSG00000033728 | <i>Lrrc14</i>       | 2.6  | 3.05 | 2.36 | 2.32 |
| ENSMUSG00000033732 | <i>Sf3b3</i>        | 3.45 | 3.99 | 3.81 | 3.65 |
| ENSMUSG00000033735 | <i>Spr</i>          | 5.54 | 6.31 | 6.06 | 5.8  |
| ENSMUSG00000033739 | <i>Fkbpl</i>        | 2.38 | 2.68 | 2.3  | 2.85 |
| ENSMUSG00000033751 | <i>Gadd45gip1</i>   | 4.41 | 5.28 | 4.76 | 4.6  |
| ENSMUSG00000033760 | <i>Rbm4b</i>        | 2.8  | 2.76 | 2.8  | 2.3  |
| ENSMUSG00000033767 | <i>D930015E06R</i>  | 2.98 | 3.01 | 3.54 | 2.87 |
| ENSMUSG00000033769 | <i>NA</i>           | 1.47 | 1.33 | 1.3  | 0.85 |
| ENSMUSG00000033773 | <i>Rpap2</i>        | 1.81 | 0.64 | 1.45 | 0.59 |
| ENSMUSG00000033781 | <i>Asb13</i>        | 5.31 | 4.67 | 5.04 | 4.85 |
| ENSMUSG00000033790 | <i>Tubgcp5</i>      | 1.65 | 1.18 | 1.45 | 0.95 |
| ENSMUSG00000033793 | <i>Atp6v1h</i>      | 5.3  | 4.48 | 4.95 | 4.48 |
| ENSMUSG00000033799 | <i>NA</i>           | 2.11 | 1.27 | 1.68 | 0.77 |
| ENSMUSG00000033808 | <i>Tmem87a</i>      | 2.16 | 1.66 | 1.84 | 1.41 |

|                    |                     |       |       |       |       |
|--------------------|---------------------|-------|-------|-------|-------|
| ENSMUSG00000033809 | <i>Alg3</i>         | 4.02  | 4.38  | 4.42  | 4.33  |
| ENSMUSG00000033813 | <i>Tceal</i>        | 2.15  | 1.31  | 1.82  | 1.43  |
| ENSMUSG00000033819 | <i>Ppp1r16a</i>     | 3.56  | 4.28  | 4.1   | 3.87  |
| ENSMUSG00000033831 | <i>Fgb</i>          | 10.83 | 11.29 | 10.79 | 10.82 |
| ENSMUSG00000033845 | <i>Mrpl15</i>       | 5.89  | 5.48  | 5.8   | 5.44  |
| ENSMUSG00000033855 | <i>NA</i>           | 1.91  | 2.15  | 1.43  | 1.57  |
| ENSMUSG00000033857 | <i>D230014K01R</i>  | 0.94  | 1.23  | 1.24  | 0.69  |
| ENSMUSG00000033860 | <i>Fgg</i>          | 11.03 | 11.24 | 10.81 | 10.77 |
| ENSMUSG00000033862 | <i>Cdk10</i>        | 2.18  | 3.14  | 2.76  | 2.61  |
| ENSMUSG00000033863 | <i>Klf9</i>         | 6.12  | 5.47  | 5.49  | 5.21  |
| ENSMUSG00000033871 | <i>Ppargc1b</i>     | 1.49  | 1.42  | 1.72  | 1.32  |
| ENSMUSG00000033880 | <i>Lgals3bp</i>     | 5.64  | 5.49  | 5.43  | 5.71  |
| ENSMUSG00000033885 | <i>Pxk</i>          | 3.8   | 3.77  | 4.01  | 3.7   |
| ENSMUSG00000033898 | <i>BC026782</i>     | 7.37  | 6     | 6.96  | 6.46  |
| ENSMUSG00000033909 | <i>NA</i>           | 2.35  | 3.15  | 2.6   | 2.87  |
| ENSMUSG00000033910 | <i>Gucyl1a3</i>     | 2.22  | 1.48  | 1.46  | 0.82  |
| ENSMUSG00000033916 | <i>Chmp2a</i>       | 6.18  | 6.58  | 6.51  | 6.29  |
| ENSMUSG00000033917 | <i>Mir16</i>        | 5.43  | 5.54  | 5.81  | 5.39  |
| ENSMUSG00000033918 | <i>Parl</i>         | 3.91  | 3.6   | 3.83  | 3.41  |
| ENSMUSG00000033931 | <i>Rbm34</i>        | 2.52  | 1.43  | 1.98  | 1.67  |
| ENSMUSG00000033933 | <i>Vhlh</i>         | 3.15  | 2.88  | 2.56  | 2.53  |
| ENSMUSG00000033938 | <i>Ndufb7</i>       | 6.25  | 6.84  | 6.91  | 7.05  |
| ENSMUSG00000033940 | <i>6720456B07Ri</i> | 6     | 6.12  | 6.15  | 6.04  |
| ENSMUSG00000033943 | <i>Mga</i>          | 2.51  | 1.84  | 2.01  | 1.5   |
| ENSMUSG00000033953 | <i>Ppp3r1</i>       | 4.94  | 4.11  | 4.52  | 3.89  |
| ENSMUSG00000033955 | <i>Tnks1bp1</i>     | 3.11  | 3.6   | 3.64  | 3.55  |
| ENSMUSG00000033960 | <i>9430020K01Ri</i> | 1.69  | 1.66  | 1.32  | 1.24  |
| ENSMUSG00000033964 | <i>Zbtb41</i>       | 2.66  | 1.86  | 2.29  | 1.83  |
| ENSMUSG00000033965 | <i>Slc16a2</i>      | 6.4   | 6.44  | 6.04  | 6.02  |
| ENSMUSG00000033970 | <i>Rfc3</i>         | 2.33  | 1.35  | 1.94  | 1.94  |
| ENSMUSG00000033972 | <i>6330416L07Ri</i> | 1.4   | 0.43  | 0.55  | 0.7   |

|                    |                     |      |      |      |      |
|--------------------|---------------------|------|------|------|------|
| ENSMUSG00000033983 | <i>Coil</i>         | 1.52 | 1.48 | 1.06 | 0.2  |
| ENSMUSG00000033985 | <i>Tesk2</i>        | 2.94 | 3.13 | 2.8  | 2.9  |
| ENSMUSG00000033991 | <i>AK129128</i>     | 2.23 | 2.14 | 1.95 | 2.06 |
| ENSMUSG00000034006 | <i>Pqlc1</i>        | 5    | 5.81 | 5.61 | 5.88 |
| ENSMUSG00000034007 | <i>Scaper</i>       | 1.02 | 0.33 | 1.08 | 0.31 |
| ENSMUSG00000034021 | <i>Pds5b</i>        | 2.23 | 1.75 | 2.01 | 1.71 |
| ENSMUSG00000034022 | <i>Cpsf1</i>        | 3.46 | 4.26 | 3.78 | 3.54 |
| ENSMUSG00000034024 | <i>Cct2</i>         | 6.29 | 6.35 | 6.35 | 6.19 |
| ENSMUSG00000034032 | <i>Rpap1</i>        | 1.86 | 2.18 | 2.34 | 1.45 |
| ENSMUSG00000034042 | <i>Gpbp111</i>      | 4.06 | 3.31 | 3.86 | 3.37 |
| ENSMUSG00000034064 | <i>Ktelc1</i>       | 3.67 | 3.31 | 3.35 | 3.02 |
| ENSMUSG00000034066 | <i>Farp2</i>        | 3.28 | 3.14 | 3.38 | 3.04 |
| ENSMUSG00000034075 | <i>Zdhhc5</i>       | 4.93 | 5.15 | 5.08 | 4.92 |
| ENSMUSG00000034083 | <i>C130022K22R</i>  | 2.37 | 1.45 | 1.89 | 1.62 |
| ENSMUSG00000034088 | <i>Hdlbp</i>        | 7.41 | 7.06 | 7.16 | 7.07 |
| ENSMUSG00000034101 | <i>Ctnnd1</i>       | 5.26 | 4.85 | 5.08 | 4.85 |
| ENSMUSG00000034105 | <i>4632415K11Ri</i> | 1.81 | 2.71 | 2.25 | 2.26 |
| ENSMUSG00000034108 | <i>Ccs</i>          | 6.92 | 7.34 | 6.93 | 6.68 |
| ENSMUSG00000034109 | <i>Golim4</i>       | 4.98 | 4.29 | 5.02 | 4.56 |
| ENSMUSG00000034118 | <i>Tpst1</i>        | 3.52 | 3.36 | 3.2  | 3.55 |
| ENSMUSG00000034120 | <i>Sfrs2</i>        | 5.55 | 5.15 | 5.11 | 4.82 |
| ENSMUSG00000034126 | <i>Pomt2</i>        | 3.17 | 3.47 | 3.3  | 3.36 |
| ENSMUSG00000034135 | <i>BC033915</i>     | 3.51 | 3.82 | 3.85 | 3.87 |
| ENSMUSG00000034152 | <i>Exoc3</i>        | 3.92 | 4.33 | 4.28 | 4.1  |
| ENSMUSG00000034154 | <i>Inoc1</i>        | 2.16 | 2.03 | 1.91 | 1.92 |
| ENSMUSG00000034157 | <i>mKIAA1737</i>    | 4.38 | 3.93 | 4.07 | 3.85 |
| ENSMUSG00000034158 | <i>Lrrc58</i>       | 4.32 | 3.68 | 4.16 | 4.02 |
| ENSMUSG00000034160 | <i>Ogt</i>          | 3.63 | 3    | 3.41 | 3.16 |
| ENSMUSG00000034163 | <i>Ccdc131</i>      | 2.41 | 1.93 | 2.61 | 1.94 |
| ENSMUSG00000034165 | <i>Ccnd3</i>        | 4.2  | 4.79 | 4.38 | 4.24 |
| ENSMUSG00000034168 | <i>6430527G18Rt</i> | 3.04 | 4.12 | 3.53 | 3.41 |

|                    |                     |      |      |      |      |
|--------------------|---------------------|------|------|------|------|
| ENSMUSG00000034171 | <i>Faah</i>         | 6.01 | 6.02 | 6.02 | 5.74 |
| ENSMUSG00000034173 | <i>2410018M08R</i>  | 1.55 | 0.12 | 1.51 | 0.79 |
| ENSMUSG00000034175 | <i>Rhbdd3</i>       | 3.03 | 3.55 | 3.38 | 3.38 |
| ENSMUSG00000034177 | <i>Rnf43</i>        | 2.5  | 3.39 | 2.76 | 2.9  |
| ENSMUSG00000034187 | <i>Nsf</i>          | 2.6  | 2.67 | 2.96 | 2.37 |
| ENSMUSG00000034189 | <i>Hsd11</i>        | 2.08 | 2.29 | 2.17 | 1.81 |
| ENSMUSG00000034190 | <i>Chmp7</i>        | 4.76 | 5.1  | 4.73 | 4.86 |
| ENSMUSG00000034192 | <i>Lsm3</i>         | 3.32 | 2.59 | 3.21 | 3.19 |
| ENSMUSG00000034194 | <i>NA</i>           | 2.33 | 3.17 | 2.39 | 2.35 |
| ENSMUSG00000034201 | <i>Gas2l1</i>       | 2.25 | 3.33 | 2.54 | 2.86 |
| ENSMUSG00000034203 | <i>Chchd4</i>       | 3.92 | 3.73 | 3.99 | 3.71 |
| ENSMUSG00000034210 | <i>4732418C07Ri</i> | 3.16 | 2.62 | 2.91 | 2.53 |
| ENSMUSG00000034211 | <i>Mrps17</i>       | 4.16 | 4.24 | 4.52 | 4.03 |
| ENSMUSG00000034216 | <i>Vps18</i>        | 1.97 | 2.97 | 2.39 | 2.54 |
| ENSMUSG00000034243 | <i>NA</i>           | 3.33 | 3.17 | 3.23 | 2.82 |
| ENSMUSG00000034245 | <i>Hdac11</i>       | 4.81 | 4.72 | 4.8  | 4.72 |
| ENSMUSG00000034247 | <i>Plekhm1</i>      | 3.17 | 3.46 | 3.43 | 3.28 |
| ENSMUSG00000034248 | <i>Slc25a37</i>     | 2.84 | 2.86 | 3.5  | 3.1  |
| ENSMUSG00000034252 | <i>Senp6</i>        | 3.86 | 3.26 | 3.68 | 3.06 |
| ENSMUSG00000034254 | <i>Agpat1</i>       | 1.99 | 2.83 | 2.62 | 2.47 |
| ENSMUSG00000034258 | <i>Flvcr2</i>       | 1.72 | 1.93 | 1.46 | 1.47 |
| ENSMUSG00000034259 | <i>Exosc4</i>       | 3.47 | 4.59 | 4.07 | 4.22 |
| ENSMUSG00000034263 | <i>2010321M09R</i>  | 1.92 | 1.9  | 1.79 | 1.39 |
| ENSMUSG00000034269 | <i>mKIAA1757</i>    | 3.21 | 3.14 | 2.99 | 2.84 |
| ENSMUSG00000034271 | <i>Jundm2</i>       | 0.69 | 0.94 | 1.03 | 0.35 |
| ENSMUSG00000034274 | <i>Thoc5</i>        | 3.13 | 3.26 | 3.23 | 2.99 |
| ENSMUSG00000034285 | <i>Nipsnap1</i>     | 7.77 | 7.33 | 7.52 | 7.13 |
| ENSMUSG00000034290 | <i>Nek9</i>         | 4.14 | 4.21 | 4.07 | 3.87 |
| ENSMUSG00000034292 | <i>Traf3ip1</i>     | 1.41 | 1.88 | 1.87 | 1.48 |
| ENSMUSG00000034297 | <i>Med13</i>        | 3.15 | 1.95 | 2.71 | 2.3  |
| ENSMUSG00000034300 | <i>2810012G03Ri</i> | 2.63 | 2.62 | 2.32 | 2.41 |

|                    |                     |      |      |      |      |
|--------------------|---------------------|------|------|------|------|
| ENSMUSG00000034308 | <i>4632417N05Rt</i> | 6.18 | 6.53 | 6.08 | 5.83 |
| ENSMUSG00000034312 | <i>NA</i>           | 3.75 | 4.52 | 4.12 | 3.99 |
| ENSMUSG00000034321 | <i>Exosc1</i>       | 3.53 | 3.54 | 3.55 | 3.37 |
| ENSMUSG00000034327 | <i>Kctd9</i>        | 2.52 | 1.41 | 1.44 | 1.29 |
| ENSMUSG00000034334 | <i>NA</i>           | 1.89 | 1.78 | 1.84 | 2    |
| ENSMUSG00000034341 | <i>Wbp2</i>         | 6.01 | 6.76 | 6.6  | 6.54 |
| ENSMUSG00000034345 | <i>Gtf2h5</i>       | 5.03 | 4.76 | 5.09 | 5.05 |
| ENSMUSG00000034349 | <i>Smc4</i>         | 2.82 | 1.21 | 2.32 | 1.22 |
| ENSMUSG00000034353 | <i>RAMP1</i>        | 1.29 | 1.96 | 2.04 | 1.47 |
| ENSMUSG00000034354 | <i>mKIAA0371</i>    | 3.51 | 3.68 | 3.5  | 3.44 |
| ENSMUSG00000034361 | <i>Cpne2</i>        | 2.19 | 2.46 | 2.36 | 2.27 |
| ENSMUSG00000034371 | <i>Dak</i>          | 7.81 | 7.74 | 8.57 | 8.41 |
| ENSMUSG00000034377 | <i>Tulp4</i>        | 1    | 0.68 | 1.05 | 0.89 |
| ENSMUSG00000034382 | <i>Al661453</i>     | 1.47 | 2.74 | 2.32 | 2.04 |
| ENSMUSG00000034390 | <i>NA</i>           | 3.36 | 3.87 | 4.08 | 4.02 |
| ENSMUSG00000034403 | <i>Pja1</i>         | 4.2  | 4.64 | 4.26 | 4.13 |
| ENSMUSG00000034412 | <i>Tbc1d10a</i>     | 2.46 | 3.34 | 3.34 | 3.19 |
| ENSMUSG00000034422 | <i>Parp14</i>       | 3.05 | 2.08 | 2.58 | 2.76 |
| ENSMUSG00000034424 | <i>Gesh</i>         | 6.25 | 5.75 | 5.9  | 5.43 |
| ENSMUSG00000034429 | <i>Zfp707</i>       | 3.13 | 3.52 | 3.54 | 3.31 |
| ENSMUSG00000034430 | <i>Zxdc</i>         | 2.13 | 1.97 | 2.26 | 2.05 |
| ENSMUSG00000034432 | <i>Cops8</i>        | 4.23 | 4.67 | 4.35 | 4.22 |
| ENSMUSG00000034435 | <i>Tmem30b</i>      | 3.1  | 4.31 | 3.74 | 3.71 |
| ENSMUSG00000034442 | <i>Trmt5</i>        | 2.66 | 2.44 | 2.4  | 2.42 |
| ENSMUSG00000034445 | <i>Cybase3</i>      | 2.87 | 3.45 | 3.4  | 3.23 |
| ENSMUSG00000034449 | <i>BC022224</i>     | 4.34 | 5.11 | 4.96 | 4.52 |
| ENSMUSG00000034450 | <i>Gulo</i>         | 8.06 | 8.09 | 8.18 | 7.83 |
| ENSMUSG00000034453 | <i>Polr3b</i>       | 2.6  | 2.49 | 2.57 | 2.46 |
| ENSMUSG00000034456 | <i>Uroc1</i>        | 7.72 | 7.92 | 8.17 | 7.92 |
| ENSMUSG00000034459 | <i>Ifit1</i>        | 3.51 | 2.01 | 2.38 | 2.97 |
| ENSMUSG00000034462 | <i>Pkd2</i>         | 2.75 | 0.68 | 2.62 | 1.37 |

|                    |                      |       |       |      |       |
|--------------------|----------------------|-------|-------|------|-------|
| ENSMUSG00000034471 | <i>Caskin2</i>       | 1.88  | 2.97  | 2    | 2.15  |
| ENSMUSG00000034473 | <i>Sec22a</i>        | 2.36  | 1.86  | 2.38 | 2.27  |
| ENSMUSG00000034480 | <i>Diap2</i>         | 2.41  | 1.12  | 1.94 | 1.22  |
| ENSMUSG00000034484 | <i>Snx2</i>          | 4.18  | 3.79  | 4.17 | 3.91  |
| ENSMUSG00000034485 | <i>Uaca</i>          | 1.47  | 1.89  | 1.96 | 1.53  |
| ENSMUSG00000034487 | <i>Kdelc2</i>        | 1.99  | 1.39  | 1.53 | 1.48  |
| ENSMUSG00000034501 | <i>I810048J11Rik</i> | 1.52  | 1.37  | 1.66 | 1.11  |
| ENSMUSG00000034509 | <i>Mad2l1bp</i>      | 2.93  | 2.68  | 2.76 | 3.05  |
| ENSMUSG00000034518 | <i>Hmgb2l1</i>       | 1.61  | 1.38  | 1.37 | 0.81  |
| ENSMUSG00000034522 | <i>Zfp395</i>        | 1.97  | 3.31  | 2.88 | 2.79  |
| ENSMUSG00000034525 | <i>NA</i>            | 2.44  | 2.53  | 2.32 | 2.19  |
| ENSMUSG00000034528 | <i>Hsd17b13</i>      | 7.79  | 6.19  | 7.95 | 7.19  |
| ENSMUSG00000034543 | <i>Morc2a</i>        | 2.52  | 2.38  | 2.55 | 2.35  |
| ENSMUSG00000034544 | <i>Rsrc1</i>         | 2.78  | 2.3   | 2.37 | 1.91  |
| ENSMUSG00000034557 | <i>Zfyve9</i>        | 2.83  | 2.37  | 2.66 | 2.58  |
| ENSMUSG00000034560 | <i>A230046K03Rik</i> | 3.05  | 2.16  | 2.59 | 2.21  |
| ENSMUSG00000034563 | <i>Ccpg1</i>         | 4.9   | 4.89  | 4.85 | 4.64  |
| ENSMUSG00000034566 | <i>Atp5h</i>         | 4.78  | 4.89  | 4.76 | 4.68  |
| ENSMUSG00000034574 | <i>Daam1</i>         | 3.54  | 3.21  | 3.47 | 3.15  |
| ENSMUSG00000034575 | <i>Pols</i>          | 2.93  | 3.25  | 3.3  | 3.14  |
| ENSMUSG00000034584 | <i>Exph5</i>         | 2.04  | 1.65  | 1.57 | 1.15  |
| ENSMUSG00000034591 | <i>Slc41a2</i>       | 1.1   | 0.61  | 0.7  | -0.13 |
| ENSMUSG00000034595 | <i>NA</i>            | 0.72  | 1.33  | 1.4  | 1.02  |
| ENSMUSG00000034602 | <i>Mon2</i>          | 4.27  | 4.35  | 4.35 | 4.05  |
| ENSMUSG00000034610 | <i>Zcchc11</i>       | 2.61  | 1.89  | 3    | 2.36  |
| ENSMUSG00000034616 | <i>Ssh3</i>          | 1.8   | 2.62  | 2.46 | 1.9   |
| ENSMUSG00000034617 | <i>Mtrr</i>          | 1.52  | 1.63  | 1.53 | 1.62  |
| ENSMUSG00000034620 | <i>Tmem5</i>         | 3.29  | 2.84  | 2.94 | 2.65  |
| ENSMUSG00000034621 | <i>NA</i>            | 2.44  | 2.26  | 2.43 | 2.28  |
| ENSMUSG00000034634 | <i>Ly6d</i>          | -0.76 | -0.44 | 1.56 | -0.79 |
| ENSMUSG00000034636 | <i>Zyg11b</i>        | 3.4   | 2.96  | 3.09 | 2.89  |



|                    |                     |      |      |       |       |
|--------------------|---------------------|------|------|-------|-------|
| ENSMUSG00000034639 | <i>NA</i>           | 1.94 | 1.65 | 1.8   | 1.86  |
| ENSMUSG00000034640 | <i>Tiparp</i>       | 2.26 | 0.78 | 1.48  | -0.19 |
| ENSMUSG00000034641 | <i>4732429D16R1</i> | 1.05 | 1.45 | -0.04 | 1.41  |
| ENSMUSG00000034645 | <i>NA</i>           | 1.39 | 0.57 | 0.64  | 1.03  |
| ENSMUSG00000034659 | <i>Tmem109</i>      | 4.08 | 4.88 | 4.22  | 4.28  |
| ENSMUSG00000034663 | <i>Bmp2k</i>        | 1.35 | 1.07 | 1.5   | 0.96  |
| ENSMUSG00000034667 | <i>Xpot</i>         | 3.7  | 3.27 | 3.6   | 3.15  |
| ENSMUSG00000034673 | <i>Pbx2</i>         | 2.95 | 3.22 | 3.13  | 3.02  |
| ENSMUSG00000034684 | <i>Sema3f</i>       | 1.32 | 1.75 | 1.04  | 1.24  |
| ENSMUSG00000034707 | <i>Gns</i>          | 6.37 | 6.39 | 6.47  | 6.2   |
| ENSMUSG00000034708 | <i>Grn</i>          | 7.04 | 7.32 | 7.49  | 7.08  |
| ENSMUSG00000034709 | <i>Ccdc128</i>      | 3.22 | 3.4  | 3.38  | 2.75  |
| ENSMUSG00000034714 | <i>Tyh2</i>         | 4.59 | 5.19 | 5.04  | 4.97  |
| ENSMUSG00000034723 | <i>Txndc13</i>      | 2.54 | 1.38 | 2.37  | 1.59  |
| ENSMUSG00000034724 | <i>Cnot6l</i>       | 4.13 | 2.66 | 3.64  | 2.95  |
| ENSMUSG00000034729 | <i>Mrps10</i>       | 2.7  | 3.1  | 2.57  | 2.04  |
| ENSMUSG00000034738 | <i>Nostrin</i>      | 3.4  | 2.52 | 3.22  | 3.16  |
| ENSMUSG00000034744 | <i>Nagk</i>         | 3.18 | 3.47 | 3.04  | 2.5   |
| ENSMUSG00000034757 | <i>Tmub2</i>        | 3.96 | 4.41 | 4.38  | 4.2   |
| ENSMUSG00000034761 | <i>Map4k5</i>       | 2.52 | 1.6  | 2.38  | 2.17  |
| ENSMUSG00000034771 | <i>Tle2</i>         | 1.02 | 1.66 | 1.43  | 1.11  |
| ENSMUSG00000034780 | <i>B3galt1</i>      | 2.01 | 0.89 | 2.52  | 1.46  |
| ENSMUSG00000034781 | <i>Gna11</i>        | 4.87 | 5.33 | 5.17  | 5.1   |
| ENSMUSG00000034783 | <i>Cd207</i>        | 1.81 | 1.96 | 1.63  | 1.6   |
| ENSMUSG00000034785 | <i>Dio1</i>         | 5.66 | 5.87 | 4.91  | 5.94  |
| ENSMUSG00000034786 | <i>Gpsm3</i>        | 1.34 | 1.34 | 1.63  | 1.37  |
| ENSMUSG00000034789 | <i>Rab24</i>        | 3.53 | 4.04 | 4.05  | 3.98  |
| ENSMUSG00000034793 | <i>G6pc3</i>        | 1.61 | 2.47 | 2.39  | 1.86  |
| ENSMUSG00000034795 | <i>Ccdc122</i>      | 1.67 | 0.76 | 0.96  | 0.79  |
| ENSMUSG00000034801 | <i>NA</i>           | 2.92 | 2.07 | 3     | 2.58  |
| ENSMUSG00000034807 | <i>Gltx25d1</i>     | 5    | 5.02 | 4.98  | 5.05  |

|                    |                      |      |      |      |       |
|--------------------|----------------------|------|------|------|-------|
| ENSMUSG00000034820 | <i>5730453I16Rik</i> | 3.25 | 3.11 | 3.14 | 2.97  |
| ENSMUSG00000034826 | <i>Nup54</i>         | 2.06 | 1.14 | 2.17 | 1.82  |
| ENSMUSG00000034832 | <i>NA</i>            | 1.1  | 1.35 | 1.38 | 1.06  |
| ENSMUSG00000034837 | <i>Gnat1</i>         | 0.11 | 0.57 | 1.53 | 0.86  |
| ENSMUSG00000034845 | <i>Plvap</i>         | 4.99 | 5.78 | 5.38 | 5.34  |
| ENSMUSG00000034848 | <i>Ttc21b</i>        | 0.99 | 0.08 | 1.04 | 0.29  |
| ENSMUSG00000034850 | <i>Tmem127</i>       | 4.08 | 4.3  | 4.16 | 4.01  |
| ENSMUSG00000034853 | <i>Acot11</i>        | 2.14 | 0.84 | 2.82 | 1.26  |
| ENSMUSG00000034854 | <i>F630110N24Rik</i> | 1.58 | 2.52 | 1.78 | 1.64  |
| ENSMUSG00000034858 | <i>BC031353</i>      | 5.17 | 4.86 | 4.85 | 4.09  |
| ENSMUSG00000034863 | <i>NA</i>            | 0.07 | 0.55 | 1.21 | -0.17 |
| ENSMUSG00000034867 | <i>Ankrd27</i>       | 2.82 | 3.01 | 3.22 | 2.85  |
| ENSMUSG00000034868 | <i>Mylc2b</i>        | 5.14 | 5.44 | 5.72 | 5.17  |
| ENSMUSG00000034871 | <i>BC026682</i>      | 1.48 | 0.52 | 2.5  | 0.45  |
| ENSMUSG00000034875 | <i>Nudt19</i>        | 5    | 4.73 | 5.1  | 4.71  |
| ENSMUSG00000034880 | <i>Mrpl34</i>        | 5.17 | 5.77 | 5.76 | 5.6   |
| ENSMUSG00000034889 | <i>2510012J08Rik</i> | 2.38 | 3.45 | 2.49 | 2.73  |
| ENSMUSG00000034892 | <i>Rps29</i>         | 3.09 | 2.76 | 3.55 | 4.15  |
| ENSMUSG00000034893 | <i>Cog3</i>          | 2.58 | 2.76 | 2.3  | 2.32  |
| ENSMUSG00000034902 | <i>Pip5k1c</i>       | 2.78 | 3.7  | 3.31 | 3.12  |
| ENSMUSG00000034903 | <i>Cobll1</i>        | 4.12 | 3.52 | 4.06 | 3.68  |
| ENSMUSG00000034908 | <i>Sidt2</i>         | 6.44 | 6.91 | 6.03 | 6.04  |
| ENSMUSG00000034911 | <i>Ushbp1</i>        | 1.29 | 2.03 | 1.16 | 1.29  |
| ENSMUSG00000034917 | <i>Tjp3</i>          | 3.08 | 4.06 | 3.76 | 3.53  |
| ENSMUSG00000034926 | <i>Dhcr24</i>        | 8.47 | 8.86 | 8.68 | 8.47  |
| ENSMUSG00000034928 | <i>Rnf44</i>         | 4.26 | 4.6  | 4.56 | 4.47  |
| ENSMUSG00000034930 | <i>Rtkn</i>          | 1.39 | 2.1  | 2.09 | 1.8   |
| ENSMUSG00000034931 | <i>Dhx8</i>          | 3.04 | 3.23 | 3.18 | 2.94  |
| ENSMUSG00000034932 | <i>Mrpl54</i>        | 4.63 | 4.84 | 4.6  | 4.54  |
| ENSMUSG00000034936 | <i>Arl4d</i>         | 3.92 | 4.17 | 4.94 | 4.95  |
| ENSMUSG00000034940 | <i>Aplgbp1</i>       | 2.54 | 1.98 | 2.1  | 1.87  |

|                    |                      |      |       |      |      |
|--------------------|----------------------|------|-------|------|------|
| ENSMUSG00000034947 | <i>Tmem106a</i>      | 2.72 | 2.57  | 2.53 | 2.13 |
| ENSMUSG00000034951 | <i>Cog7</i>          | 3.45 | 3.99  | 3.32 | 3.1  |
| ENSMUSG00000034957 | <i>Cebpa</i>         | 7.27 | 8.01  | 7.49 | 7.39 |
| ENSMUSG00000034973 | <i>NA</i>            | 1.49 | 1.18  | 1.26 | 0.67 |
| ENSMUSG00000034974 | <i>Dapk3</i>         | 3.46 | 4.67  | 4.26 | 3.96 |
| ENSMUSG00000034993 | <i>Vat1</i>          | 3.8  | 4.56  | 4.18 | 4    |
| ENSMUSG00000034994 | <i>Eef2</i>          | 8.62 | 9.2   | 8.76 | 8.93 |
| ENSMUSG00000034998 | <i>Foxn2</i>         | 1.88 | 1.65  | 1.74 | 1.24 |
| ENSMUSG00000035000 | <i>Dpp4</i>          | 6.16 | 5.48  | 5.94 | 5.42 |
| ENSMUSG00000035004 | <i>Igsf6</i>         | 1.66 | 0.96  | 1.77 | 0.37 |
| ENSMUSG00000035007 | <i>Rundc1</i>        | 2.88 | 3.18  | 2.52 | 2.58 |
| ENSMUSG00000035011 | <i>Zbtb7a</i>        | 3.97 | 4.07  | 3.73 | 3.64 |
| ENSMUSG00000035021 | <i>NA</i>            | 2.35 | 2.18  | 2.24 | 2.1  |
| ENSMUSG00000035024 | <i>Ncapd3</i>        | 0.66 | 0.71  | 1.23 | 0.63 |
| ENSMUSG00000035027 | <i>Map2k2</i>        | 6.06 | 6.88  | 6.42 | 6.24 |
| ENSMUSG00000035031 | <i>C8a</i>           | 6.13 | 6.63  | 6.1  | 6.36 |
| ENSMUSG00000035041 | <i>Creb3l3</i>       | 7.88 | 7.48  | 7.78 | 7.49 |
| ENSMUSG00000035042 | <i>Ccl5</i>          | 1.06 | -0.08 | 1.68 | 0.69 |
| ENSMUSG00000035047 | <i>Kri1</i>          | 2.19 | 2.84  | 2.77 | 2.45 |
| ENSMUSG00000035048 | <i>Anapc13</i>       | 6.04 | 5.82  | 6.19 | 6.09 |
| ENSMUSG00000035049 | <i>Rrp12</i>         | 0.6  | 2.22  | 1.02 | 1.51 |
| ENSMUSG00000035051 | <i>Dhx57</i>         | 1.62 | 1.83  | 1.65 | 1.33 |
| ENSMUSG00000035064 | <i>Eef2k</i>         | 1.18 | 1.82  | 1.63 | 1.57 |
| ENSMUSG00000035069 | <i>Oma1</i>          | 3.26 | 3.52  | 3.4  | 2.85 |
| ENSMUSG00000035078 | <i>Mtmr9</i>         | 3.9  | 3.89  | 3.66 | 3.45 |
| ENSMUSG00000035086 | <i>Becn1</i>         | 4.96 | 5.07  | 4.87 | 4.5  |
| ENSMUSG00000035093 | <i>3110001120Rik</i> | 4.15 | 3.7   | 3.92 | 3.69 |
| ENSMUSG00000035104 | <i>Tmem166</i>       | 5.66 | 5.42  | 5.85 | 5.39 |
| ENSMUSG00000035105 | <i>Egln3</i>         | 3.66 | 4.02  | 3.76 | 3.5  |
| ENSMUSG00000035133 | <i>Arhgap5</i>       | 4.64 | 3.25  | 3.69 | 3.01 |
| ENSMUSG00000035139 | <i>Secisbp2</i>      | 1.86 | 2.48  | 2.22 | 2.04 |

|                    |                     |      |      |      |       |
|--------------------|---------------------|------|------|------|-------|
| ENSMUSG00000035142 | <i>Nubpl</i>        | 2.59 | 1.36 | 1.69 | 1.49  |
| ENSMUSG00000035150 | <i>Eif2s3x</i>      | 1.46 | 1.52 | 1.54 | 1.55  |
| ENSMUSG00000035151 | <i>Elmod2</i>       | 2.75 | 1.6  | 2.35 | 1.65  |
| ENSMUSG00000035152 | <i>Ap2b1</i>        | 4.22 | 4.4  | 4.08 | 3.9   |
| ENSMUSG00000035161 | <i>Ints6</i>        | 1.86 | 1.86 | 2.51 | 2.12  |
| ENSMUSG00000035164 | <i>NA</i>           | 1.17 | 0.37 | 1.26 | 1.25  |
| ENSMUSG00000035168 | <i>AK134490</i>     | 0.88 | 0.69 | 1.09 | 0.79  |
| ENSMUSG00000035171 | <i>1110059E24Ri</i> | 3.47 | 2.8  | 3.56 | 2.92  |
| ENSMUSG00000035172 | <i>Plekhh3</i>      | 1.48 | 2.76 | 1.82 | 2.04  |
| ENSMUSG00000035173 | <i>A630007B06Ri</i> | 2.32 | 1.6  | 2.05 | 1.53  |
| ENSMUSG00000035181 | <i>D930036F22Ri</i> | 1.67 | 2.13 | 1.6  | 1.51  |
| ENSMUSG00000035184 | <i>NA</i>           | 1.62 | 2.2  | 1.96 | 1.94  |
| ENSMUSG00000035198 | <i>Tubg1</i>        | 3.18 | 3.87 | 3.94 | 4.08  |
| ENSMUSG00000035199 | <i>Arl6ip5</i>      | 5.12 | 5.05 | 5    | 4.75  |
| ENSMUSG00000035202 | <i>Kiaa0028</i>     | 7.33 | 7.11 | 7.11 | 6.27  |
| ENSMUSG00000035203 | <i>Epn1</i>         | 5.99 | 7    | 6.81 | 6.67  |
| ENSMUSG00000035206 | <i>3110056O03Ri</i> | 1.98 | 3.16 | 2.94 | 2.61  |
| ENSMUSG00000035212 | <i>Leprot</i>       | 3.44 | 2.87 | 2.97 | 2.67  |
| ENSMUSG00000035215 | <i>Lsm7</i>         | 1.82 | 0.8  | 0.85 | -0.23 |
| ENSMUSG00000035227 | <i>Spcs2</i>        | 4.96 | 4.76 | 4.19 | 4.06  |
| ENSMUSG00000035234 | <i>Ccdc98</i>       | 2.11 | 1.52 | 1.95 | 1.58  |
| ENSMUSG00000035237 | <i>Lcat</i>         | 9.07 | 9.52 | 9.17 | 9.08  |
| ENSMUSG00000035242 | <i>Oaz1</i>         | 3.6  | 2.83 | 3.03 | 3.09  |
| ENSMUSG00000035245 | <i>A130022J15Ri</i> | 0.7  | 1.15 | 1.05 | 0.42  |
| ENSMUSG00000035247 | <i>NA</i>           | 4.75 | 4.7  | 4.73 | 4.5   |
| ENSMUSG00000035248 | <i>Zcchc6</i>       | 4.69 | 4.2  | 4.2  | 3.96  |
| ENSMUSG00000035258 | <i>Abi3bp</i>       | 1.47 | 0.63 | 1.15 | 0.9   |
| ENSMUSG00000035266 | <i>Hel308</i>       | 0.77 | 0.88 | 1.37 | 0.3   |
| ENSMUSG00000035268 | <i>Pkig</i>         | 3.13 | 3.31 | 3.27 | 2.86  |
| ENSMUSG00000035273 | <i>Hpse</i>         | 1.66 | 0.44 | 1.22 | 1.05  |
| ENSMUSG00000035278 | <i>Plekhj1</i>      | 4.24 | 4.81 | 4.62 | 4.57  |

|                    |                     |      |      |      |      |
|--------------------|---------------------|------|------|------|------|
| ENSMUSG00000035284 | <i>Vps13c</i>       | 2.33 | 1.85 | 2.35 | 1.86 |
| ENSMUSG00000035297 | <i>Cops4</i>        | 5.01 | 4.89 | 4.95 | 4.82 |
| ENSMUSG00000035299 | <i>Mid1</i>         | 1.35 | 1.12 | 1.27 | 1.19 |
| ENSMUSG00000035310 | <i>Al461788</i>     | 2.11 | 1.22 | 1.94 | 1.52 |
| ENSMUSG00000035311 | <i>Gnptab</i>       | 2    | 2.04 | 2.19 | 1.68 |
| ENSMUSG00000035325 | <i>NA</i>           | 5.67 | 6.04 | 6.1  | 5.9  |
| ENSMUSG00000035329 | <i>Fbxo33</i>       | 3.1  | 1.91 | 2.51 | 2.34 |
| ENSMUSG00000035342 | <i>Lzts2</i>        | 1.36 | 2.67 | 1.62 | 1.91 |
| ENSMUSG00000035349 | <i>Mia2</i>         | 6.12 | 5.22 | 5.92 | 5.37 |
| ENSMUSG00000035351 | <i>Nup37</i>        | 2.01 | 0.89 | 2.35 | 1.01 |
| ENSMUSG00000035354 | <i>Uvrag</i>        | 3.51 | 3.31 | 3.85 | 3.68 |
| ENSMUSG00000035356 | <i>Nfkbiz</i>       | 1.32 | 0.24 | 1.27 | 0.51 |
| ENSMUSG00000035357 | <i>Pdzrn3</i>       | 1.92 | 1.67 | 2.6  | 2.01 |
| ENSMUSG00000035367 | <i>Rmi1</i>         | 3.28 | 2.13 | 2.93 | 2.59 |
| ENSMUSG00000035370 | <i>Adat3</i>        | 3.2  | 3.84 | 3.41 | 3.43 |
| ENSMUSG00000035372 | <i>1810055G02R1</i> | 4.97 | 4.71 | 5.44 | 4.92 |
| ENSMUSG00000035376 | <i>Ptplb</i>        | 4.15 | 3.96 | 4.15 | 4.02 |
| ENSMUSG00000035378 | <i>Shq1</i>         | 1.06 | 1.46 | 1.05 | 1.1  |
| ENSMUSG00000035382 | <i>Pcsk7</i>        | 3.09 | 3.62 | 3.17 | 2.99 |
| ENSMUSG00000035392 | <i>Dennd1a</i>      | 2.83 | 3.28 | 3.3  | 3.13 |
| ENSMUSG00000035397 | <i>Klf16</i>        | 0.55 | 1.51 | 1.29 | 0.64 |
| ENSMUSG00000035401 | <i>AK009395</i>     | 2.25 | 2.38 | 2.36 | 2.19 |
| ENSMUSG00000035413 | <i>Tmem98</i>       | 4.6  | 4.08 | 4.47 | 3.44 |
| ENSMUSG00000035437 | <i>Rabgap1</i>      | 2.47 | 1.72 | 2.27 | 1.74 |
| ENSMUSG00000035441 | <i>Myo1d</i>        | 2.68 | 3.12 | 2.77 | 2.44 |
| ENSMUSG00000035443 | <i>mThy28</i>       | 4.02 | 4.03 | 3.81 | 3.52 |
| ENSMUSG00000035451 | <i>Foxa1</i>        | 3.23 | 3.01 | 2.73 | 2.75 |
| ENSMUSG00000035459 | <i>Stab2</i>        | 3.32 | 4.06 | 3.35 | 3.6  |
| ENSMUSG00000035469 | <i>Rcbtb1</i>       | 4.5  | 4    | 4.35 | 4.03 |
| ENSMUSG00000035472 | <i>Slc25a21</i>     | 3.56 | 2.2  | 2.9  | 2.39 |
| ENSMUSG00000035473 | <i>Galm</i>         | 6.7  | 6.44 | 6.72 | 6.47 |

|                    |                     |       |       |       |       |
|--------------------|---------------------|-------|-------|-------|-------|
| ENSMUSG00000035476 | <i>Map3k7ip3</i>    | 1.7   | 0.68  | 0.98  | 0.32  |
| ENSMUSG00000035478 | <i>Mbd3</i>         | 4.44  | 5.38  | 4.6   | 4.73  |
| ENSMUSG00000035492 | <i>NA</i>           | 2.31  | 1.72  | 2.34  | 1.91  |
| ENSMUSG00000035493 | <i>Tgfb1</i>        | 4.14  | 4.66  | 3.97  | 4.06  |
| ENSMUSG00000035495 | <i>BC057893</i>     | 3.15  | 2.92  | 3.07  | 2.97  |
| ENSMUSG00000035498 | <i>Cdcp1</i>        | 0.7   | 0.8   | 1.14  | 0.47  |
| ENSMUSG00000035504 | <i>Reep6</i>        | 8.47  | 9.05  | 8.89  | 8.76  |
| ENSMUSG00000035505 | <i>Cox18</i>        | 4.32  | 4.16  | 3.92  | 3.79  |
| ENSMUSG00000035509 | <i>Fbxl21</i>       | 0.96  | 1.6   | 1.3   | 1.29  |
| ENSMUSG00000035517 | <i>Tdrd7</i>        | 3.51  | 3.61  | 3.4   | 3.39  |
| ENSMUSG00000035521 | <i>Gnptg</i>        | 3.6   | 3.84  | 3.65  | 3.36  |
| ENSMUSG00000035529 | <i>Prdm4</i>        | 2.06  | 2.07  | 1.9   | 1.73  |
| ENSMUSG00000035530 | <i>Eif1</i>         | 5.33  | 4.94  | 5.76  | 5.55  |
| ENSMUSG00000035540 | <i>Gc</i>           | 12.29 | 12.07 | 12.19 | 12.11 |
| ENSMUSG00000035545 | <i>Leng8</i>        | 2.44  | 2.72  | 3.04  | 2.49  |
| ENSMUSG00000035559 | <i>BC051227</i>     | 3.87  | 4.33  | 4.28  | 3.99  |
| ENSMUSG00000035561 | <i>Aldh1b1</i>      | 5.88  | 5.97  | 6.08  | 5.54  |
| ENSMUSG00000035569 | <i>Ankrd11</i>      | 3.42  | 3.73  | 3.62  | 3.42  |
| ENSMUSG00000035572 | <i>Wdr32</i>        | 3.52  | 2.99  | 2.93  | 3.03  |
| ENSMUSG00000035575 | <i>Utp6</i>         | 4.02  | 3.55  | 3.75  | 3.38  |
| ENSMUSG00000035585 | <i>Tsen34</i>       | 2.06  | 2.94  | 2.32  | 2.08  |
| ENSMUSG00000035595 | <i>I600002K03R1</i> | 1.74  | 2.25  | 2.51  | 2.85  |
| ENSMUSG00000035596 | <i>Leng4</i>        | 4.42  | 4.73  | 4.57  | 4.29  |
| ENSMUSG00000035597 | <i>Prpf39</i>       | 2.84  | 1.7   | 2.38  | 1.65  |
| ENSMUSG00000035601 | <i>Rg9mtd3</i>      | 1.6   | 1.23  | 1.34  | 1.6   |
| ENSMUSG00000035614 | <i>NA</i>           | 2.53  | 1.64  | 2.42  | 1.9   |
| ENSMUSG00000035620 | <i>Ric8b</i>        | 2.78  | 2.62  | 2.17  | 2.31  |
| ENSMUSG00000035621 | <i>Midn</i>         | 3.58  | 4.42  | 4.33  | 3.95  |
| ENSMUSG00000035623 | <i>Rsfl</i>         | 1.69  | 0.84  | 1.55  | 0.97  |
| ENSMUSG00000035629 | <i>mKIAA0226</i>    | 2.27  | 2.49  | 2.58  | 2.46  |
| ENSMUSG00000035632 | <i>AK031165</i>     | 2.46  | 3.08  | 2.94  | 2.85  |

|                    |                     |       |      |      |       |
|--------------------|---------------------|-------|------|------|-------|
| ENSMUSG00000035637 | <i>Grhpr</i>        | 7.04  | 7.55 | 7.21 | 7.03  |
| ENSMUSG00000035642 | <i>I810020D17Ri</i> | 3.84  | 3.92 | 4.57 | 4.39  |
| ENSMUSG00000035649 | <i>D4Wsu132e</i>    | 1.48  | 0.96 | 0.95 | 0.83  |
| ENSMUSG00000035666 | <i>Gtf3c4</i>       | 2.94  | 2.61 | 2.75 | 2.59  |
| ENSMUSG00000035671 | <i>Zswim4</i>       | 1.25  | 2.27 | 1.17 | 0.88  |
| ENSMUSG00000035673 | <i>Sbno2</i>        | 2.2   | 2.84 | 2.22 | 1.97  |
| ENSMUSG00000035674 | <i>Ndufa3</i>       | 5.37  | 5.42 | 5.93 | 6.05  |
| ENSMUSG00000035686 | <i>Thrsp</i>        | 7.52  | 6.46 | 7.97 | 7.84  |
| ENSMUSG00000035692 | <i>Isg15</i>        | 3.05  | 3.1  | 2.22 | 3.04  |
| ENSMUSG00000035696 | <i>Rnf38</i>        | 1.76  | 1.18 | 1.6  | 1.03  |
| ENSMUSG00000035697 | <i>Hmha1</i>        | 0.86  | 1.45 | 1.64 | 0.48  |
| ENSMUSG00000035699 | <i>Osta</i>         | 3     | 1.42 | 2.75 | 1.98  |
| ENSMUSG00000035704 | <i>Alg8</i>         | 2.93  | 2.56 | 2.79 | 2.94  |
| ENSMUSG00000035711 | <i>Dok3</i>         | -0.63 | 0.01 | 1.08 | -0.25 |
| ENSMUSG00000035726 | <i>Supt16h</i>      | 3.59  | 3.33 | 3.54 | 3.23  |
| ENSMUSG00000035754 | <i>Wdr18</i>        | 4.93  | 5.71 | 5.33 | 5.14  |
| ENSMUSG00000035757 | <i>I300018J18Ri</i> | 5.67  | 5.8  | 5.81 | 5.46  |
| ENSMUSG00000035759 | <i>NA</i>           | 1.27  | 1.76 | 1.92 | 1.5   |
| ENSMUSG00000035762 | <i>Tmem161b</i>     | 1.95  | 0.89 | 2.07 | 0.97  |
| ENSMUSG00000035764 | <i>Fbxo45</i>       | 2.24  | 1.46 | 1.96 | 1.4   |
| ENSMUSG00000035765 | <i>Dym</i>          | 4.38  | 4.51 | 4.69 | 4.38  |
| ENSMUSG00000035769 | <i>Xylb</i>         | 6.31  | 6.15 | 6.57 | 6.36  |
| ENSMUSG00000035770 | <i>Dync1li2</i>     | 3.14  | 2.91 | 2.77 | 2.63  |
| ENSMUSG00000035772 | <i>MRP-S2</i>       | 4.37  | 5.29 | 5.17 | 5.14  |
| ENSMUSG00000035776 | <i>Cd99l2</i>       | 4.38  | 4.09 | 3.91 | 3.61  |
| ENSMUSG00000035778 | <i>Ggta1</i>        | 1.11  | 0.81 | 0.82 | 0.57  |
| ENSMUSG00000035780 | <i>Ugt2a3</i>       | 7.46  | 6.83 | 7.03 | 6.78  |
| ENSMUSG00000035781 | <i>C030046I01Ri</i> | 4.92  | 5.21 | 5.1  | 4.94  |
| ENSMUSG00000035783 | <i>AK080187</i>     | 1.91  | 1.85 | 2.36 | 2.58  |
| ENSMUSG00000035790 | <i>I500031L02Ri</i> | 2.33  | 2.03 | 2.12 | 2.01  |
| ENSMUSG00000035798 | <i>mKIAA0946</i>    | 2.06  | 1.55 | 1.4  | 0.99  |

|                    |                    |      |      |      |      |
|--------------------|--------------------|------|------|------|------|
| ENSMUSG00000035811 | <i>Ugt2b35</i>     | 5.28 | 5.11 | 4.91 | 4.89 |
| ENSMUSG00000035824 | <i>Tk2</i>         | 3.39 | 3.64 | 3.37 | 3.1  |
| ENSMUSG00000035828 | <i>Pim3</i>        | 4.99 | 5.4  | 5.63 | 5.53 |
| ENSMUSG00000035834 | <i>Polr3g</i>      | 2.82 | 1.94 | 2.3  | 1.72 |
| ENSMUSG00000035836 | <i>Ugt2b1</i>      | 8.1  | 7.37 | 7.7  | 7.48 |
| ENSMUSG00000035840 | <i>Lysmd3</i>      | 4.24 | 2.93 | 3.43 | 3.1  |
| ENSMUSG00000035845 | <i>Alg12</i>       | 1.93 | 2.79 | 2.07 | 1.8  |
| ENSMUSG00000035847 | <i>Ids</i>         | 3.26 | 2.58 | 2.95 | 2.78 |
| ENSMUSG00000035851 | <i>Ythdc1</i>      | 4.33 | 3.72 | 3.65 | 3.28 |
| ENSMUSG00000035864 | <i>Syt1</i>        | 2.93 | 2.27 | 2.53 | 1.94 |
| ENSMUSG00000035868 | NA                 | 2    | 0.87 | 1.74 | 0.77 |
| ENSMUSG00000035873 | <i>Pawr</i>        | 2.4  | 1.87 | 2.23 | 2.01 |
| ENSMUSG00000035875 | <i>AII82371</i>    | 7.73 | 7.48 | 7.28 | 7.17 |
| ENSMUSG00000035877 | <i>Zhx3</i>        | 4.4  | 3.86 | 4    | 3.88 |
| ENSMUSG00000035878 | <i>C630028N24R</i> | 5.78 | 4.62 | 5.85 | 5.1  |
| ENSMUSG00000035885 | <i>Cox8a</i>       | 7.08 | 7.7  | 7.7  | 7.68 |
| ENSMUSG00000035890 | <i>Rnf126</i>      | 3.75 | 4.83 | 4.56 | 4.33 |
| ENSMUSG00000035898 | <i>AK017645</i>    | 1.87 | 0.39 | 1.17 | 0.69 |
| ENSMUSG00000035900 | <i>BC021523</i>    | 1.65 | 2.09 | 1.44 | 0.98 |
| ENSMUSG00000035901 | <i>ORF37</i>       | 3.8  | 3.82 | 3.64 | 3.46 |
| ENSMUSG00000035919 | <i>Bbs9</i>        | 1.18 | 1.09 | 0.92 | 0.56 |
| ENSMUSG00000035929 | NA                 | 3.7  | 3.52 | 3.45 | 3.5  |
| ENSMUSG00000035933 | NA                 | 2.64 | 2.4  | 2.35 | 2.38 |
| ENSMUSG00000035936 | <i>Aldh5a1</i>     | 4.61 | 4.52 | 4.58 | 4.22 |
| ENSMUSG00000035941 | <i>mKIAA1417</i>   | 4.24 | 3.67 | 4.04 | 3.51 |
| ENSMUSG00000035944 | <i>AW124722</i>    | 4.69 | 5.26 | 4.72 | 4.96 |
| ENSMUSG00000035948 | <i>8430416H19R</i> | 2.88 | 1.62 | 2.57 | 1.63 |
| ENSMUSG00000035949 | <i>Fbxw2</i>       | 3.91 | 3.56 | 3.81 | 3.55 |
| ENSMUSG00000035953 | <i>Tmem55b</i>     | 4.12 | 3.95 | 4.04 | 3.66 |
| ENSMUSG00000035954 | <i>mKIAA0716</i>   | 2.15 | 1.69 | 2.2  | 2    |
| ENSMUSG00000035958 | <i>AK140178</i>    | 3.53 | 2.4  | 3.49 | 2.75 |



|                    |                     |      |       |      |      |
|--------------------|---------------------|------|-------|------|------|
| ENSMUSG00000035960 | <i>Apex1</i>        | 4.23 | 4.83  | 4.16 | 4.2  |
| ENSMUSG00000035969 | <i>Rusc2</i>        | 2.68 | 3.66  | 3.39 | 3.1  |
| ENSMUSG00000035992 | <i>Fnip1</i>        | 3.99 | 2.27  | 3.78 | 3.02 |
| ENSMUSG00000036002 | <i>B230312A22Rt</i> | 2.21 | 2.54  | 2.22 | 1.91 |
| ENSMUSG00000036019 | <i>Tmtc2</i>        | 2.63 | 2.61  | 2.09 | 2.05 |
| ENSMUSG00000036023 | <i>Parp2</i>        | 2.92 | 2.18  | 2.7  | 1.97 |
| ENSMUSG00000036026 | <i>Tmem63b</i>      | 4.59 | 5.29  | 4.56 | 4.62 |
| ENSMUSG00000036027 | <i>NA</i>           | 0.54 | -0.07 | 1.35 | 0.54 |
| ENSMUSG00000036046 | <i>5031439G07Rt</i> | 3.47 | 3.67  | 3.74 | 3.19 |
| ENSMUSG00000036053 | <i>Fmnl2</i>        | 2.05 | 1.18  | 1.31 | 0.99 |
| ENSMUSG00000036057 | <i>Ptpn23</i>       | 2.13 | 2.99  | 2.65 | 2.58 |
| ENSMUSG00000036061 | <i>Smug1</i>        | 1.84 | 1.94  | 1.75 | 1.73 |
| ENSMUSG00000036073 | <i>Galt</i>         | 4.06 | 5.1   | 4.22 | 4.51 |
| ENSMUSG00000036078 | <i>Oprs1</i>        | 6.69 | 7.39  | 6.33 | 6.51 |
| ENSMUSG00000036083 | <i>Slc17a3</i>      | 4.25 | 4.22  | 3.99 | 3.89 |
| ENSMUSG00000036087 | <i>Slain2</i>       | 4.57 | 3.65  | 4.1  | 3.63 |
| ENSMUSG00000036093 | <i>Arl5a</i>        | 5.38 | 4.66  | 4.82 | 4.7  |
| ENSMUSG00000036097 | <i>6030443O07Rt</i> | 2.08 | 1.56  | 1.93 | 1.67 |
| ENSMUSG00000036098 | <i>NA</i>           | 2.89 | 3.95  | 3.42 | 3.32 |
| ENSMUSG00000036103 | <i>Colec12</i>      | 4.48 | 4.28  | 4.04 | 3.52 |
| ENSMUSG00000036104 | <i>Rab3gap1</i>     | 3.8  | 3.79  | 3.8  | 3.32 |
| ENSMUSG00000036106 | <i>Arhgap8</i>      | 1.66 | 2.12  | 2.37 | 1.89 |
| ENSMUSG00000036110 | <i>Slc17a2</i>      | 5.66 | 5.34  | 5.19 | 5.29 |
| ENSMUSG00000036112 | <i>Metap2</i>       | 3.64 | 3.35  | 3.45 | 3.14 |
| ENSMUSG00000036114 | <i>2810432D09Rt</i> | 3.84 | 4.49  | 3.81 | 4.03 |
| ENSMUSG00000036120 | <i>Rfxank</i>       | 2.6  | 3.57  | 2.84 | 2.75 |
| ENSMUSG00000036138 | <i>Acaal1a</i>      | 5.21 | 5.68  | 5.86 | 5.67 |
| ENSMUSG00000036151 | <i>Tm6sf2</i>       | 5.97 | 6.2   | 5.9  | 5.6  |
| ENSMUSG00000036160 | <i>Surf6</i>        | 2.48 | 2.89  | 2.27 | 2.3  |
| ENSMUSG00000036167 | <i>Pphln1</i>       | 2.33 | 2.61  | 2.46 | 2.12 |
| ENSMUSG00000036180 | <i>Gatad2a</i>      | 4.3  | 4.61  | 4.54 | 4.53 |

|                    |                     |      |      |      |       |
|--------------------|---------------------|------|------|------|-------|
| ENSMUSG00000036181 | <i>Hist1h1c</i>     | 3.25 | 3.76 | 4.08 | 3.76  |
| ENSMUSG00000036188 | <i>Ankmy2</i>       | 2.87 | 2.65 | 2.8  | 2.48  |
| ENSMUSG00000036197 | <i>Glt8d3</i>       | 2.2  | 1.54 | 1.81 | 1.52  |
| ENSMUSG00000036199 | <i>Ndufa13</i>      | 7.39 | 7.34 | 7.57 | 7.4   |
| ENSMUSG00000036202 | <i>Rif1</i>         | 1.84 | 0.91 | 1.55 | 1.1   |
| ENSMUSG00000036208 | <i>BC027231</i>     | 2.12 | 1.87 | 2.27 | 1.68  |
| ENSMUSG00000036214 | <i>I700022C21Ri</i> | 3.49 | 3.43 | 3.58 | 3.22  |
| ENSMUSG00000036216 | <i>Leap2</i>        | 6.96 | 6.65 | 7.1  | 6.53  |
| ENSMUSG00000036241 | <i>Ube2r2</i>       | 7.12 | 7.15 | 7.32 | 7.11  |
| ENSMUSG00000036249 | <i>Rbm43</i>        | 1.69 | 1.61 | 1.35 | 1.05  |
| ENSMUSG00000036256 | <i>Igfbp7</i>       | 6.63 | 6.42 | 6.31 | 6.22  |
| ENSMUSG00000036257 | <i>Pnpla8</i>       | 5.77 | 4.77 | 5.47 | 4.89  |
| ENSMUSG00000036270 | <i>Edc4</i>         | 2.53 | 2.88 | 2.52 | 2.38  |
| ENSMUSG00000036275 | <i>9530068E07Ri</i> | 7.01 | 6.53 | 6.68 | 6.41  |
| ENSMUSG00000036278 | <i>Macrodl</i>      | 4.99 | 5.84 | 5.18 | 5.18  |
| ENSMUSG00000036279 | <i>NA</i>           | 4.79 | 3.76 | 4    | 3.36  |
| ENSMUSG00000036281 | <i>Snapc4</i>       | 0.82 | 1.7  | 1.4  | 0.95  |
| ENSMUSG00000036282 | <i>Nat12</i>        | 3.5  | 2.2  | 2.92 | 2.31  |
| ENSMUSG00000036285 | <i>2610024G14Ri</i> | 3.14 | 3.45 | 3.05 | 2.95  |
| ENSMUSG00000036291 | <i>4932432K03Ri</i> | 2.77 | 2    | 2.63 | 1.96  |
| ENSMUSG00000036292 | <i>Gramd1c</i>      | 3.11 | 2.21 | 3.07 | 2.12  |
| ENSMUSG00000036299 | <i>BC031181</i>     | 6.03 | 5.84 | 5.83 | 5.79  |
| ENSMUSG00000036309 | <i>Skp1a</i>        | 6.9  | 6.28 | 6.7  | 6.17  |
| ENSMUSG00000036315 | <i>Znrd1</i>        | 3.84 | 4    | 3.85 | 4.01  |
| ENSMUSG00000036323 | <i>Srp72</i>        | 5.7  | 5.05 | 5.22 | 4.85  |
| ENSMUSG00000036327 | <i>Qscn6l1</i>      | 1.64 | 1.77 | 1.64 | 1.37  |
| ENSMUSG00000036333 | <i>C330002I19Ri</i> | 3.18 | 3.16 | 3.04 | 2.84  |
| ENSMUSG00000036339 | <i>6720456H20Ri</i> | 2.95 | 1.77 | 2.51 | 1.99  |
| ENSMUSG00000036352 | <i>Ubadc1</i>       | 3.66 | 3.5  | 3.53 | 3.3   |
| ENSMUSG00000036362 | <i>P2ry13</i>       | 1.28 | 0.1  | 0.32 | -0.34 |
| ENSMUSG00000036368 | <i>AW061290</i>     | 5.48 | 4.48 | 5.19 | 4.55  |

|                    |                     |      |      |      |      |
|--------------------|---------------------|------|------|------|------|
| ENSMUSG00000036371 | <i>Serbp1</i>       | 7.08 | 6.43 | 6.79 | 6.42 |
| ENSMUSG00000036372 | <i>NA</i>           | 5.29 | 4.79 | 5.13 | 5.23 |
| ENSMUSG00000036376 | <i>Abt1</i>         | 1.42 | 1.64 | 1.84 | 1.67 |
| ENSMUSG00000036381 | <i>P2ry14</i>       | 0.92 | 0    | 1.12 | 0.06 |
| ENSMUSG00000036391 | <i>Sec24a</i>       | 5.21 | 4.27 | 5.14 | 4.67 |
| ENSMUSG00000036398 | <i>Ppp1r11</i>      | 5.36 | 6.12 | 5.68 | 5.45 |
| ENSMUSG00000036402 | <i>Gng12</i>        | 4.26 | 3.79 | 3.92 | 3.63 |
| ENSMUSG00000036427 | <i>Gpi1</i>         | 5.32 | 5.39 | 5.79 | 5.41 |
| ENSMUSG00000036430 | <i>Tbcc</i>         | 2.41 | 3.16 | 2.76 | 2.22 |
| ENSMUSG00000036432 | <i>Siah2</i>        | 3.05 | 3.33 | 3.33 | 3.26 |
| ENSMUSG00000036435 | <i>Exoc1</i>        | 2.14 | 1.93 | 1.58 | 1.74 |
| ENSMUSG00000036438 | <i>Calm2</i>        | 5.66 | 5.36 | 5.63 | 4.88 |
| ENSMUSG00000036442 | <i>Thap11</i>       | 3.68 | 4.09 | 3.75 | 3.85 |
| ENSMUSG00000036446 | <i>Lum</i>          | 3.43 | 2.17 | 2.9  | 2.56 |
| ENSMUSG00000036450 | <i>Hif1an</i>       | 2.98 | 2.98 | 2.62 | 2.42 |
| ENSMUSG00000036452 | <i>Arhgap26</i>     | 1.5  | 1.4  | 1.44 | 1.15 |
| ENSMUSG00000036461 | <i>Elf1</i>         | 2.89 | 2.47 | 2.96 | 2.75 |
| ENSMUSG00000036473 | <i>Tbcd24</i>       | 3.08 | 2.26 | 2.5  | 2.22 |
| ENSMUSG00000036478 | <i>Btg1</i>         | 5.05 | 4.63 | 4.75 | 4.31 |
| ENSMUSG00000036492 | <i>Rnf39</i>        | 2.62 | 2.95 | 2.78 | 2.78 |
| ENSMUSG00000036499 | <i>Eeal</i>         | 3.54 | 2.8  | 3.01 | 2.68 |
| ENSMUSG00000036501 | <i>2610024E20Ri</i> | 4.08 | 3.47 | 3.8  | 3.33 |
| ENSMUSG00000036503 | <i>Rzf</i>          | 7.13 | 6.27 | 6.65 | 6.11 |
| ENSMUSG00000036504 | <i>Phpt1</i>        | 3.79 | 4.84 | 4.49 | 4.45 |
| ENSMUSG00000036513 | <i>Commd2</i>       | 3.91 | 3.58 | 3.92 | 3.41 |
| ENSMUSG00000036528 | <i>Ppfibp2</i>      | 2.99 | 2.8  | 3.74 | 3.26 |
| ENSMUSG00000036529 | <i>Sbfl</i>         | 3.4  | 4.17 | 3.65 | 3.5  |
| ENSMUSG00000036534 | <i>BC031853</i>     | 3.33 | 3.85 | 3.52 | 3.54 |
| ENSMUSG00000036550 | <i>NA</i>           | 4.3  | 3.85 | 4.13 | 3.76 |
| ENSMUSG00000036555 | <i>Iqce</i>         | 0.24 | 0.65 | 1.3  | 0.93 |
| ENSMUSG00000036561 | <i>Saps2</i>        | 3.39 | 3.9  | 3.76 | 3.52 |

|                    |                     |      |      |      |      |
|--------------------|---------------------|------|------|------|------|
| ENSMUSG00000036565 | <i>Ttyh3</i>        | 1.3  | 2.32 | 2.14 | 2.1  |
| ENSMUSG00000036568 | <i>NA</i>           | 1.84 | 1.85 | 1.84 | 1.91 |
| ENSMUSG00000036570 | <i>Fxyd1</i>        | 8.23 | 8.48 | 8.85 | 8.65 |
| ENSMUSG00000036572 | <i>Upf3b</i>        | 3.01 | 1.83 | 2.97 | 2.55 |
| ENSMUSG00000036580 | <i>Spg20</i>        | 4.41 | 4.28 | 4.1  | 3.68 |
| ENSMUSG00000036585 | <i>Fgf1</i>         | 6.24 | 5.86 | 5.91 | 5.46 |
| ENSMUSG00000036591 | <i>Arhgap21</i>     | 2.68 | 2.87 | 2.84 | 2.75 |
| ENSMUSG00000036594 | <i>H2-Aa</i>        | 6.08 | 5.49 | 6.06 | 5.3  |
| ENSMUSG00000036606 | <i>NA</i>           | 5.47 | 5.96 | 5.73 | 5.54 |
| ENSMUSG00000036611 | <i>2310005P05Ri</i> | 2.45 | 2.61 | 3.09 | 2.84 |
| ENSMUSG00000036613 | <i>Tssc1</i>        | 1.96 | 2.67 | 2.5  | 2.07 |
| ENSMUSG00000036615 | <i>Rfxap</i>        | 2.59 | 2.74 | 2.38 | 2.63 |
| ENSMUSG00000036620 | <i>Mgat4b</i>       | 4.7  | 5.39 | 4.67 | 4.67 |
| ENSMUSG00000036622 | <i>Atp13a2</i>      | 2.57 | 3.38 | 2.92 | 2.85 |
| ENSMUSG00000036632 | <i>Alg5</i>         | 5.17 | 4.9  | 5.01 | 4.57 |
| ENSMUSG00000036636 | <i>Clcn7</i>        | 3.97 | 4.52 | 4.28 | 4.27 |
| ENSMUSG00000036639 | <i>Nudt1</i>        | 3.52 | 3.72 | 3.54 | 3.34 |
| ENSMUSG00000036644 | <i>Tbcl1d9b</i>     | 4.52 | 5.13 | 4.53 | 4.54 |
| ENSMUSG00000036646 | <i>Man1b1</i>       | 4.26 | 4.41 | 4.14 | 4.07 |
| ENSMUSG00000036649 | <i>Slc45a4</i>      | 0.7  | 1.34 | 1.4  | 0.91 |
| ENSMUSG00000036655 | <i>Colec11</i>      | 4.68 | 4.54 | 4.55 | 4.56 |
| ENSMUSG00000036678 | <i>Aaas</i>         | 2.46 | 2.81 | 2.94 | 2.75 |
| ENSMUSG00000036686 | <i>Cc2d1a</i>       | 2.07 | 2.72 | 2.41 | 2.09 |
| ENSMUSG00000036687 | <i>Tmem184a</i>     | 2.11 | 2.23 | 2.58 | 2.23 |
| ENSMUSG00000036693 | <i>Noll4</i>        | 3.5  | 3.55 | 3.46 | 3.3  |
| ENSMUSG00000036698 | <i>Eif2c2</i>       | 1.19 | 1.25 | 1.04 | 0.9  |
| ENSMUSG00000036707 | <i>Cab39</i>        | 5.01 | 4.22 | 4.57 | 4.2  |
| ENSMUSG00000036712 | <i>Cyld</i>         | 2.55 | 1.65 | 2.29 | 1.59 |
| ENSMUSG00000036721 | <i>Zscan12</i>      | 1.91 | 1.11 | 1.7  | 1.3  |
| ENSMUSG00000036733 | <i>3100004P22Ri</i> | 3.95 | 4.77 | 4.51 | 4.35 |
| ENSMUSG00000036737 | <i>Oxsr1</i>        | 3.8  | 3.57 | 3.45 | 3.19 |

|                    |                     |      |      |      |      |
|--------------------|---------------------|------|------|------|------|
| ENSMUSG00000036748 | <i>Cuedc2</i>       | 3.9  | 4.3  | 4.17 | 4.1  |
| ENSMUSG00000036751 | <i>Cox6b1</i>       | 8.29 | 8.13 | 8.75 | 8.6  |
| ENSMUSG00000036752 | <i>Tubb2c</i>       | 5.15 | 5.67 | 4.64 | 4.84 |
| ENSMUSG00000036764 | <i>Dnajc12</i>      | 2.89 | 2.99 | 2.81 | 2.72 |
| ENSMUSG00000036775 | <i>Decr2</i>        | 7.02 | 6.57 | 7    | 6.65 |
| ENSMUSG00000036779 | <i>NA</i>           | 3.85 | 3.5  | 3.99 | 3.77 |
| ENSMUSG00000036781 | <i>Rps27l</i>       | 7.37 | 4.81 | 6.72 | 6.24 |
| ENSMUSG00000036782 | <i>Klhl13</i>       | 2.73 | 2.3  | 2.26 | 1.58 |
| ENSMUSG00000036810 | <i>Tmem188</i>      | 3.13 | 2.38 | 2.91 | 2.36 |
| ENSMUSG00000036813 | <i>Entpd8</i>       | 5.36 | 5.52 | 5.47 | 5.22 |
| ENSMUSG00000036817 | <i>Unc84a</i>       | 2.28 | 2.41 | 2.29 | 2.01 |
| ENSMUSG00000036819 | <i>Jmjd4</i>        | 1.57 | 1.88 | 1.13 | 1.37 |
| ENSMUSG00000036820 | <i>Amdhd2</i>       | 2.54 | 3.27 | 2.97 | 2.57 |
| ENSMUSG00000036822 | <i>Topors</i>       | 3.71 | 3.3  | 3.39 | 3.02 |
| ENSMUSG00000036825 | <i>Ssx2ip</i>       | 1.92 | 1.88 | 2.16 | 1.81 |
| ENSMUSG00000036826 | <i>U2af114</i>      | 1.95 | 2.32 | 2.18 | 2.1  |
| ENSMUSG00000036833 | <i>Pnpla7</i>       | 4.67 | 4.96 | 5.02 | 4.93 |
| ENSMUSG00000036835 | <i>Psenen</i>       | 2.58 | 2.82 | 2.74 | 2.84 |
| ENSMUSG00000036840 | <i>Siah1a</i>       | 1.93 | 1    | 1.53 | 1.09 |
| ENSMUSG00000036845 | <i>Lin37</i>        | 2.45 | 3.12 | 3.05 | 2.26 |
| ENSMUSG00000036850 | <i>Mrpl41</i>       | 4.5  | 4.4  | 4.63 | 4.38 |
| ENSMUSG00000036854 | <i>Hspb6</i>        | 3.18 | 2.81 | 3.35 | 3.21 |
| ENSMUSG00000036860 | <i>Mrpl55</i>       | 3.35 | 4.01 | 4.41 | 3.99 |
| ENSMUSG00000036863 | <i>NA</i>           | 1.8  | 1.96 | 2.18 | 1.82 |
| ENSMUSG00000036867 | <i>Smad6</i>        | 1.62 | 3.28 | 2.1  | 1.87 |
| ENSMUSG00000036873 | <i>2410004B18Ri</i> | 2.2  | 1.98 | 2.14 | 2.51 |
| ENSMUSG00000036875 | <i>Dna2l</i>        | 1.06 | 1.9  | 1.75 | 1.65 |
| ENSMUSG00000036879 | <i>Phkb</i>         | 3.52 | 2.66 | 3.01 | 2.6  |
| ENSMUSG00000036880 | <i>Acaa2</i>        | 9.47 | 9.37 | 9.27 | 9.06 |
| ENSMUSG00000036885 | <i>4631416L12Ri</i> | 4.91 | 4.27 | 4.53 | 4.51 |
| ENSMUSG00000036887 | <i>C1qa</i>         | 5.06 | 5.41 | 5.25 | 4.92 |

|                    |                     |      |      |      |      |
|--------------------|---------------------|------|------|------|------|
| ENSMUSG00000036890 | <i>Gtdc1</i>        | 1.65 | 1.51 | 2.02 | 1.68 |
| ENSMUSG00000036892 | <i>Prodh2</i>       | 6.92 | 7.51 | 7.14 | 6.98 |
| ENSMUSG00000036893 | <i>Ehmt1</i>        | 2.95 | 3.11 | 2.89 | 2.89 |
| ENSMUSG00000036896 | <i>C1qc</i>         | 5.38 | 5.49 | 5.32 | 5.11 |
| ENSMUSG00000036904 | <i>Fzd8</i>         | 1.55 | 2.7  | 2.31 | 1.85 |
| ENSMUSG00000036905 | <i>C1qb</i>         | 6.14 | 5.99 | 5.84 | 5.71 |
| ENSMUSG00000036908 | <i>Unc93b1</i>      | 4.03 | 4.35 | 4.22 | 4.06 |
| ENSMUSG00000036916 | <i>Zfp280c</i>      | 0.85 | 0.23 | 1.06 | 0.46 |
| ENSMUSG00000036918 | <i>Ttc7</i>         | 3.76 | 4.06 | 4.51 | 4.35 |
| ENSMUSG00000036932 | <i>Aifm1</i>        | 6.15 | 5.59 | 5.98 | 5.37 |
| ENSMUSG00000036934 | <i>4921524J17Ri</i> | 2.22 | 1.24 | 2.48 | 2.5  |
| ENSMUSG00000036940 | <i>Aof2</i>         | 2.81 | 2.79 | 3    | 2.63 |
| ENSMUSG00000036941 | <i>Elac1</i>        | 1.64 | 1.08 | 1.74 | 1.35 |
| ENSMUSG00000036943 | <i>Rab8B</i>        | 1.45 | 0.1  | 0.43 | 0.11 |
| ENSMUSG00000036948 | <i>BC037034</i>     | 2.44 | 2.97 | 2.92 | 2.48 |
| ENSMUSG00000036955 | <i>2510003E04Ri</i> | 3.09 | 3.06 | 3.44 | 3.29 |
| ENSMUSG00000036957 | <i>Lrfn3</i>        | 2.11 | 2.87 | 1.68 | 1.74 |
| ENSMUSG00000036959 | <i>Bcor1l</i>       | 1.18 | 1.59 | 1.18 | 1.06 |
| ENSMUSG00000036966 | <i>Spryd3</i>       | 3.6  | 4.21 | 3.73 | 3.57 |
| ENSMUSG00000036968 | <i>2610019P18Ri</i> | 1.98 | 2.09 | 1.53 | 1.79 |
| ENSMUSG00000036975 | <i>Tmem177</i>      | 2.45 | 2.69 | 2.52 | 2.01 |
| ENSMUSG00000036980 | <i>AK047944</i>     | 3.6  | 4.36 | 4.06 | 4    |
| ENSMUSG00000036983 | <i>Tfb1m</i>        | 3.38 | 3.19 | 3.38 | 2.71 |
| ENSMUSG00000036985 | <i>Zdhhc9</i>       | 6.17 | 6.16 | 6.38 | 6.08 |
| ENSMUSG00000036986 | <i>Pml</i>          | 3.11 | 3.48 | 3.33 | 3.33 |
| ENSMUSG00000036989 | <i>hac1</i>         | 1.76 | 2.1  | 2.29 | 1.99 |
| ENSMUSG00000036990 | <i>Otud4</i>        | 3.3  | 2.52 | 3    | 2.83 |
| ENSMUSG00000036992 | <i>Nxt1</i>         | 2.25 | 3.03 | 2.4  | 2.85 |
| ENSMUSG00000036995 | <i>Ddefl1</i>       | 0.55 | 1.94 | 1.07 | 1.57 |
| ENSMUSG00000037003 | <i>Tenc1</i>        | 3.93 | 4.74 | 4.32 | 4.1  |
| ENSMUSG00000037007 | <i>Zfp113</i>       | 1.52 | 0.83 | 1.23 | 0.7  |

|                    |                    |       |      |       |      |
|--------------------|--------------------|-------|------|-------|------|
| ENSMUSG00000037013 | <i>Ss18</i>        | 3.02  | 2.9  | 3.2   | 2.75 |
| ENSMUSG00000037015 | <i>Tmem185b</i>    | 3.19  | 2.47 | 2.9   | 2.17 |
| ENSMUSG00000037017 | <i>Zscan21</i>     | 2.53  | 2.56 | 2.57  | 2.55 |
| ENSMUSG00000037019 | <i>BC038156</i>    | 3.2   | 2.2  | 2.61  | 2.02 |
| ENSMUSG00000037022 | <i>Mmaa</i>        | 2.91  | 2.69 | 2.83  | 2.33 |
| ENSMUSG00000037025 | <i>Foxa2</i>       | 4.43  | 4.42 | 3.67  | 3.21 |
| ENSMUSG00000037029 | <i>Zfp146</i>      | 3.85  | 3.16 | 3.41  | 3.35 |
| ENSMUSG00000037049 | <i>Smpd1</i>       | 4.9   | 5.47 | 5.18  | 5.14 |
| ENSMUSG00000037053 | <i>Azgp1</i>       | 10.05 | 9.76 | 10.06 | 9.89 |
| ENSMUSG00000037058 | <i>Paip2</i>       | 6.05  | 5.45 | 5.75  | 5.3  |
| ENSMUSG00000037062 | <i>Sh3glb1</i>     | 5.64  | 5    | 5.62  | 5.02 |
| ENSMUSG00000037071 | <i>Scd1</i>        | 9.67  | 9.63 | 10.17 | 9.93 |
| ENSMUSG00000037072 | <i>15-Sep</i>      | 7.34  | 6.93 | 7.01  | 6.56 |
| ENSMUSG00000037075 | <i>Rnfl39</i>      | 5.32  | 4.31 | 4.99  | 4.29 |
| ENSMUSG00000037085 | <i>Trmt12</i>      | 2.06  | 2.34 | 1.81  | 1.54 |
| ENSMUSG00000037089 | <i>Slc35b2</i>     | 3.57  | 4.27 | 4.06  | 3.98 |
| ENSMUSG00000037095 | <i>Lrg1</i>        | 7.68  | 8.61 | 8.44  | 7.56 |
| ENSMUSG00000037096 | <i>NA</i>          | 3.6   | 2.05 | 3.31  | 3.7  |
| ENSMUSG00000037098 | <i>NA</i>          | 2.19  | 2.79 | 2.68  | 2.43 |
| ENSMUSG00000037103 | <i>BC057552</i>    | 0.57  | 1.37 | 1.46  | 0.95 |
| ENSMUSG00000037104 | <i>Socs5</i>       | 1.96  | 1.82 | 1.72  | 1.26 |
| ENSMUSG00000037108 | <i>Zcwpw1</i>      | 1.25  | 1.66 | 1.88  | 1.42 |
| ENSMUSG00000037110 | <i>A230067G21R</i> | 3.01  | 2.42 | 2.74  | 2.34 |
| ENSMUSG00000037112 | <i>Snf1lk2</i>     | 1.75  | 1.64 | 2.18  | 1.86 |
| ENSMUSG00000037119 | <i>D15Ert621e</i>  | 5.15  | 4.55 | 4.84  | 4.36 |
| ENSMUSG00000037134 | <i>AI931714</i>    | 2.49  | 2.45 | 2.8   | 2.41 |
| ENSMUSG00000037149 | <i>Ddx1</i>        | 5.41  | 5.06 | 5.11  | 4.87 |
| ENSMUSG00000037151 | <i>Lrrc20</i>      | 1.21  | 2.02 | 2.24  | 1.69 |
| ENSMUSG00000037152 | <i>Ndufc1</i>      | 6.04  | 3.6  | 5.64  | 4.66 |
| ENSMUSG00000037157 | <i>Il22ral</i>     | 0.72  | 1.93 | 2.08  | 0.96 |
| ENSMUSG00000037166 | <i>Ppp1r14a</i>    | 1.05  | 2.9  | 2.04  | 2.42 |

|                    |                     |      |      |      |      |
|--------------------|---------------------|------|------|------|------|
| ENSMUSG00000037174 | <i>Elf2</i>         | 3.67 | 3.77 | 3.56 | 3.27 |
| ENSMUSG00000037190 | <i>Cyb561d2</i>     | 2.61 | 3.27 | 3.03 | 3.16 |
| ENSMUSG00000037197 | <i>Rbm17</i>        | 4.06 | 3.91 | 3.94 | 3.49 |
| ENSMUSG00000037204 | <i>9430023L20Ri</i> | 4.39 | 4.94 | 4.8  | 4.31 |
| ENSMUSG00000037210 | <i>BC037112</i>     | 2.59 | 2.4  | 2.6  | 2.49 |
| ENSMUSG00000037211 | <i>Spry1</i>        | 1.5  | 2.28 | 1.69 | 1.66 |
| ENSMUSG00000037214 | <i>Thap1</i>        | 1.5  | 2.35 | 2.1  | 1.94 |
| ENSMUSG00000037216 | <i>Lipt1</i>        | 2.18 | 1.99 | 2.06 | 1.98 |
| ENSMUSG00000037221 | <i>Mospd3</i>       | 4.65 | 5.9  | 5.39 | 5.33 |
| ENSMUSG00000037234 | <i>Hook3</i>        | 2.62 | 1.35 | 2.12 | 1.89 |
| ENSMUSG00000037235 | <i>Mxd4</i>         | 4.67 | 5.41 | 4.82 | 4.69 |
| ENSMUSG00000037236 | <i>Matr3</i>        | 5.06 | 3.65 | 4.52 | 3.8  |
| ENSMUSG00000037242 | <i>Clic4</i>        | 5    | 5    | 4.41 | 4.86 |
| ENSMUSG00000037251 | <i>4930444A02Ri</i> | 2.13 | 2.49 | 2.3  | 1.49 |
| ENSMUSG00000037253 | <i>Mex3c</i>        | 3.31 | 2.69 | 2.97 | 2.46 |
| ENSMUSG00000037254 | <i>Itih2</i>        | 9.28 | 9.09 | 9.13 | 9.24 |
| ENSMUSG00000037257 | <i>2310007F21Ri</i> | 3.76 | 3.65 | 4.13 | 3.77 |
| ENSMUSG00000037260 | <i>Hgsnat</i>       | 4.92 | 4.97 | 4.95 | 4.98 |
| ENSMUSG00000037262 | <i>Kin</i>          | 3.22 | 2.92 | 3.06 | 2.44 |
| ENSMUSG00000037266 | <i>D4Wsu53e</i>     | 6.14 | 5.5  | 6.33 | 5.57 |
| ENSMUSG00000037270 | <i>NA</i>           | 3.27 | 2.77 | 2.98 | 2.2  |
| ENSMUSG00000037275 | <i>Gemin5</i>       | 1.64 | 2.29 | 1.66 | 1.59 |
| ENSMUSG00000037278 | <i>Tmem97</i>       | 5.56 | 4.69 | 5.14 | 4.92 |
| ENSMUSG00000037286 | <i>Stag1</i>        | 3.23 | 2.59 | 2.93 | 2.45 |
| ENSMUSG00000037287 | <i>Tbcel</i>        | 4.19 | 3.93 | 4.16 | 3.95 |
| ENSMUSG00000037291 | <i>NA</i>           | 1.54 | 0.79 | 1.23 | 0.4  |
| ENSMUSG00000037295 | <i>Ldlrap1</i>      | 3.77 | 4.07 | 4.05 | 3.82 |
| ENSMUSG00000037296 | <i>Lsm1</i>         | 3.74 | 3.01 | 3.57 | 3.51 |
| ENSMUSG00000037300 | <i>Ttc13</i>        | 4.17 | 3.92 | 4.03 | 3.65 |
| ENSMUSG00000037316 | <i>Bag4</i>         | 4.09 | 3.5  | 3.93 | 3.46 |
| ENSMUSG00000037321 | <i>Tap1</i>         | 3.16 | 2.77 | 3.06 | 2.97 |



|                    |                     |      |       |      |       |
|--------------------|---------------------|------|-------|------|-------|
| ENSMUSG00000037325 | <i>Bbs7</i>         | 1.2  | 0.1   | 1.27 | 0.18  |
| ENSMUSG00000037326 | <i>Solh</i>         | 2.43 | 3.28  | 2.91 | 2.82  |
| ENSMUSG00000037331 | <i>NA</i>           | 4.93 | 5.23  | 5.04 | 5.01  |
| ENSMUSG00000037339 | <i>2410018C17Ri</i> | 1.39 | 1.63  | 1.6  | 1.49  |
| ENSMUSG00000037343 | <i>Taf2</i>         | 2.72 | 2.41  | 2.51 | 2.32  |
| ENSMUSG00000037344 | <i>Slc12a9</i>      | 1.13 | 1.94  | 1.75 | 1.78  |
| ENSMUSG00000037348 | <i>Paqr7</i>        | 2.7  | 3.33  | 4.15 | 3.64  |
| ENSMUSG00000037349 | <i>Nudt22</i>       | 2.36 | 3.35  | 3.51 | 3.55  |
| ENSMUSG00000037351 | <i>Actr1b</i>       | 4.86 | 5.35  | 5.05 | 4.88  |
| ENSMUSG00000037353 | <i>Letmd1</i>       | 3.89 | 4.27  | 4.4  | 4.24  |
| ENSMUSG00000037355 | <i>4933407H18Ri</i> | 1.08 | -0.14 | 0.87 | 0.2   |
| ENSMUSG00000037361 | <i>0610009D07Ri</i> | 4.78 | 4.49  | 4.71 | 4.52  |
| ENSMUSG00000037364 | <i>Ars2</i>         | 3.99 | 4.42  | 4.07 | 3.82  |
| ENSMUSG00000037366 | <i>Pafah2</i>       | 5.86 | 5.93  | 6.2  | 5.49  |
| ENSMUSG00000037369 | <i>Utx</i>          | 2.6  | 2.02  | 2.63 | 2.2   |
| ENSMUSG00000037370 | <i>Enpp1</i>        | 3.37 | 2.74  | 3.2  | 2.78  |
| ENSMUSG00000037373 | <i>Ctbp1</i>        | 4.81 | 4.99  | 4.86 | 4.46  |
| ENSMUSG00000037376 | <i>Trmt6</i>        | 1.75 | 2.18  | 1.46 | 1.82  |
| ENSMUSG00000037395 | <i>Rcor3</i>        | 2    | 1.4   | 1.58 | 0.85  |
| ENSMUSG00000037400 | <i>Atp11b</i>       | 4.13 | 3.26  | 3.99 | 3.28  |
| ENSMUSG00000037405 | <i>Hlf0</i>         | 2.22 | 2.65  | 2.37 | 2.46  |
| ENSMUSG00000037406 | <i>Htra4</i>        | 1.67 | 1.72  | 1.09 | -0.24 |
| ENSMUSG00000037408 | <i>Cnnm4</i>        | 1.08 | 1.61  | 1.71 | 1.54  |
| ENSMUSG00000037410 | <i>Tbc1d2b</i>      | 3.45 | 3.66  | 3.35 | 3.7   |
| ENSMUSG00000037415 | <i>Ranbp10</i>      | 4.63 | 4.75  | 4.6  | 4.33  |
| ENSMUSG00000037416 | <i>Dmxl1</i>        | 2.27 | 1.12  | 1.92 | 1.31  |
| ENSMUSG00000037426 | <i>Depdc5</i>       | 1.45 | 1.39  | 1.6  | 1.65  |
| ENSMUSG00000037434 | <i>Slc30a1</i>      | 3.58 | 3.24  | 3.68 | 3.15  |
| ENSMUSG00000037440 | <i>Vnn1</i>         | 5.39 | 4.18  | 4.55 | 4.18  |
| ENSMUSG00000037443 | <i>Ccdc21</i>       | 2.5  | 2.67  | 3.86 | 2.58  |
| ENSMUSG00000037455 | <i>NA</i>           | 1.14 | 0.85  | 1.05 | 1     |

|                    |                     |       |       |      |       |
|--------------------|---------------------|-------|-------|------|-------|
| ENSMUSG00000037458 | <i>Azin1</i>        | 5.23  | 3.62  | 5.05 | 4.56  |
| ENSMUSG00000037461 | <i>Ints7</i>        | 2.45  | 3.01  | 2.58 | 2.55  |
| ENSMUSG00000037465 | <i>Klf10</i>        | 4.67  | 3.72  | 3.99 | 3.79  |
| ENSMUSG00000037470 | <i>Ugcgl1</i>       | 4.29  | 4.5   | 4.15 | 4.03  |
| ENSMUSG00000037475 | <i>Thoc2</i>        | 3.29  | 1.75  | 2.68 | 1.9   |
| ENSMUSG00000037486 | <i>Asxl2</i>        | 2.28  | 1.5   | 1.66 | 1.3   |
| ENSMUSG00000037487 | <i>mKIAA0896</i>    | 3.96  | 3.62  | 4.14 | 3.71  |
| ENSMUSG00000037493 | <i>Cib2</i>         | 1.95  | 1.98  | 1.79 | 1.26  |
| ENSMUSG00000037499 | <i>Nenf</i>         | 2.48  | 3.11  | 2.87 | 2.66  |
| ENSMUSG00000037503 | <i>BC043098</i>     | 4.35  | 4.37  | 4.21 | 4     |
| ENSMUSG00000037513 | <i>Samd4b</i>       | 3.34  | 3.74  | 3.46 | 3.51  |
| ENSMUSG00000037514 | <i>Pank2</i>        | 3.65  | 2.79  | 3.21 | 3.13  |
| ENSMUSG00000037519 | <i>NA</i>           | 3.71  | 3.17  | 3.4  | 3.06  |
| ENSMUSG00000037523 | <i>D430028G21R</i>  | 5.61  | 6.42  | 5.81 | 5.81  |
| ENSMUSG00000037525 | <i>Bcdin3d</i>      | 1.18  | 1.94  | 1.4  | 1.01  |
| ENSMUSG00000037526 | <i>D14Ert436e</i>   | 3.33  | 2.9   | 3.44 | 3.3   |
| ENSMUSG00000037531 | <i>Mrpl47</i>       | 4.12  | 3.48  | 4.16 | 3.51  |
| ENSMUSG00000037533 | <i>Rapgef6</i>      | 2.07  | 1.49  | 2.09 | 1.58  |
| ENSMUSG00000037536 | <i>Fbxo34</i>       | 2.49  | 2.13  | 2.58 | 2.56  |
| ENSMUSG00000037541 | <i>Shank2</i>       | 1.51  | 1.66  | 0.69 | 0.76  |
| ENSMUSG00000037542 | <i>Aldh8a1</i>      | 7.91  | 7.71  | 7.92 | 7.61  |
| ENSMUSG00000037548 | <i>H2-DMb2</i>      | -1.34 | -1.64 | 1    | -2.22 |
| ENSMUSG00000037552 | <i>Plekhg2</i>      | 0.9   | 1.49  | 1.31 | 0.99  |
| ENSMUSG00000037553 | <i>Zdhc18</i>       | 3     | 3.59  | 3.52 | 3.32  |
| ENSMUSG00000037563 | <i>Rps16</i>        | 2.15  | 2.73  | 2.99 | 3.18  |
| ENSMUSG00000037573 | <i>Tob1</i>         | 6.22  | 6.03  | 5.97 | 5.85  |
| ENSMUSG00000037580 | <i>Gch1</i>         | 6.2   | 5.98  | 6.32 | 6.04  |
| ENSMUSG00000037581 | <i>Rps6kc1</i>      | 0.93  | 1.48  | 1.05 | 0.99  |
| ENSMUSG00000037583 | <i>Nr0b2</i>        | 4.3   | 6.16  | 3.91 | 4.32  |
| ENSMUSG00000037600 | <i>I810019J16Ri</i> | 0.79  | 1.97  | 1.6  | 1.24  |
| ENSMUSG00000037601 | <i>Nme1</i>         | 5.94  | 5.94  | 5.89 | 5.65  |

|                    |                     |      |      |      |       |
|--------------------|---------------------|------|------|------|-------|
| ENSMUSG00000037608 | <i>Bclaf1</i>       | 4.19 | 2.89 | 3.37 | 2.72  |
| ENSMUSG00000037621 | <i>Atoh8</i>        | 2.94 | 5.09 | 3.86 | 3.78  |
| ENSMUSG00000037622 | <i>Wdte1</i>        | 5.55 | 5.99 | 6.33 | 5.71  |
| ENSMUSG00000037640 | <i>Zfp60</i>        | 1.76 | 1.26 | 1.44 | 0.74  |
| ENSMUSG00000037643 | <i>Prkci</i>        | 3.08 | 2.26 | 2.68 | 2.25  |
| ENSMUSG00000037646 | <i>NA</i>           | 1.81 | 1.45 | 1.74 | 1.22  |
| ENSMUSG00000037649 | <i>H2-DMa</i>       | 2.67 | 2.05 | 2.35 | 1.37  |
| ENSMUSG00000037652 | <i>Phc3</i>         | 1.12 | 0.75 | 1.24 | 1.13  |
| ENSMUSG00000037656 | <i>Slc20a2</i>      | 5.22 | 5.41 | 5.43 | 5.02  |
| ENSMUSG00000037664 | <i>Cdkn1c</i>       | 2.4  | 1.5  | 2.41 | 1.65  |
| ENSMUSG00000037669 | <i>I110057K04Ri</i> | 4.77 | 4.4  | 4.72 | 4.48  |
| ENSMUSG00000037674 | <i>Rfxdc2</i>       | 2.01 | 1.1  | 1.37 | 1     |
| ENSMUSG00000037679 | <i>2610204M08R</i>  | 3.63 | 4.42 | 3.86 | 3.75  |
| ENSMUSG00000037686 | <i>A530050D06R</i>  | 5.41 | 6.13 | 6.09 | 5.82  |
| ENSMUSG00000037692 | <i>Ahdc1</i>        | 1.74 | 2.72 | 2.2  | 1.94  |
| ENSMUSG00000037697 | <i>AK036369</i>     | 2.01 | 0.94 | 2.21 | 1.83  |
| ENSMUSG00000037703 | <i>Prosapip1</i>    | 3.33 | 3.78 | 3.75 | 3.52  |
| ENSMUSG00000037706 | <i>Cd81</i>         | 7.64 | 7.57 | 7.63 | 7.4   |
| ENSMUSG00000037709 | <i>D430015B01R</i>  | 3.81 | 3.37 | 4.57 | 4.13  |
| ENSMUSG00000037710 | <i>Cisd1</i>        | 6.79 | 6.75 | 7.07 | 6.82  |
| ENSMUSG00000037712 | <i>Plekhc1</i>      | 5.71 | 5.26 | 5.42 | 5.34  |
| ENSMUSG00000037720 | <i>Tmem33</i>       | 4.92 | 4.12 | 4.4  | 4.08  |
| ENSMUSG00000037722 | <i>Gnpnat1</i>      | 4.3  | 3.32 | 4.06 | 3.41  |
| ENSMUSG00000037730 | <i>Mynn</i>         | 2.18 | 1.24 | 1.74 | 1.54  |
| ENSMUSG00000037740 | <i>Mrps26</i>       | 3.38 | 3.89 | 4.04 | 3.9   |
| ENSMUSG00000037742 | <i>Eef1a1</i>       | 7.95 | 7.83 | 8.1  | 8.05  |
| ENSMUSG00000037750 | <i>BC017647</i>     | 3.39 | 3.29 | 3.29 | 3.21  |
| ENSMUSG00000037752 | <i>Xkr8</i>         | 1.42 | 1.55 | 1.74 | 0.98  |
| ENSMUSG00000037761 | <i>Actr5</i>        | 1.41 | 2.25 | 1.56 | 1.63  |
| ENSMUSG00000037762 | <i>Slc16a9</i>      | 1.13 | 0.89 | 0.13 | -0.28 |
| ENSMUSG00000037773 | <i>A930025D01R</i>  | 2.58 | 3.13 | 2.92 | 2.64  |

|                    |                     |       |       |       |       |
|--------------------|---------------------|-------|-------|-------|-------|
| ENSMUSG00000037780 | <i>Mbll</i>         | 6.93  | 7.15  | 6.82  | 6.7   |
| ENSMUSG00000037787 | <i>2810002N01Ri</i> | 4.37  | 4.65  | 4.25  | 4.33  |
| ENSMUSG00000037788 | <i>AW146242</i>     | 1.09  | 0.62  | 0.6   | 0.44  |
| ENSMUSG00000037791 | <i>Phf12</i>        | 2.97  | 3.17  | 3.25  | 2.93  |
| ENSMUSG00000037795 | <i>B3bp</i>         | 3.29  | 2.4   | 3.13  | 2.47  |
| ENSMUSG00000037797 | <i>Adh4</i>         | 5.64  | 5.9   | 5.43  | 5.46  |
| ENSMUSG00000037798 | <i>Mat1a</i>        | 10.58 | 10.71 | 10.83 | 10.42 |
| ENSMUSG00000037805 | <i>Rpl10a</i>       | 0.54  | 1.43  | 1.17  | 1     |
| ENSMUSG00000037808 | <i>2810485105Ri</i> | 2.1   | 0.75  | 1.74  | 1.17  |
| ENSMUSG00000037814 | <i>Larp2</i>        | 5.66  | 5.39  | 5.3   | 5.06  |
| ENSMUSG00000037815 | <i>Ctnna1</i>       | 5.35  | 5.32  | 5.36  | 5.06  |
| ENSMUSG00000037818 | <i>3110057O12Ri</i> | 3.3   | 2.38  | 3.23  | 2.6   |
| ENSMUSG00000037820 | <i>Tgm2</i>         | 5.44  | 6.07  | 5.1   | 5.25  |
| ENSMUSG00000037822 | <i>1110003E01Ri</i> | 5.2   | 5.43  | 5.23  | 4.8   |
| ENSMUSG00000037824 | <i>Tspan14</i>      | 4.31  | 4.59  | 4.28  | 4.1   |
| ENSMUSG00000037826 | <i>Ppm1k</i>        | 5.18  | 4.24  | 5.01  | 4.38  |
| ENSMUSG00000037845 | <i>D630004A14R</i>  | 1.48  | 0.99  | 1.24  | 1.09  |
| ENSMUSG00000037847 | <i>BC016495</i>     | 4.11  | 2.97  | 4.65  | 4.04  |
| ENSMUSG00000037851 | <i>Iars</i>         | 3.45  | 3.55  | 3.07  | 3.07  |
| ENSMUSG00000037857 | <i>Nufip2</i>       | 3.33  | 2.2   | 3.06  | 2.79  |
| ENSMUSG00000037872 | <i>Darc</i>         | 1.85  | 2     | 1.75  | 1.92  |
| ENSMUSG00000037876 | <i>NA</i>           | 3.24  | 2.61  | 2.81  | 2.51  |
| ENSMUSG00000037885 | <i>Stk35</i>        | 2.44  | 2.3   | 2.68  | 2.43  |
| ENSMUSG00000037894 | <i>H2afz</i>        | 0.25  | 1.11  | 1.76  | 1.9   |
| ENSMUSG00000037896 | <i>Rcor1</i>        | 2.7   | 2.74  | 2.6   | 2.48  |
| ENSMUSG00000037902 | <i>Sirpa</i>        | 2.46  | 2.42  | 2.87  | 1.96  |
| ENSMUSG00000037905 | <i>Bri3bp</i>       | 3.46  | 4.26  | 3.88  | 3.87  |
| ENSMUSG00000037916 | <i>Ndufv1</i>       | 6.74  | 6.97  | 7.01  | 6.67  |
| ENSMUSG00000037926 | <i>Ssh2</i>         | 1.72  | 2.04  | 2     | 1.57  |
| ENSMUSG00000037933 | <i>Bicd2</i>        | 2.12  | 2.19  | 1.79  | 1.55  |
| ENSMUSG00000037935 | <i>Smarcel</i>      | 2.53  | 1.68  | 1.99  | 1.93  |

|                    |                     |      |      |      |      |
|--------------------|---------------------|------|------|------|------|
| ENSMUSG00000037936 | <i>Scarb1</i>       | 7.12 | 7.56 | 7.6  | 7.4  |
| ENSMUSG00000037938 | <i>Chchd5</i>       | 3.36 | 3.94 | 4.22 | 4.08 |
| ENSMUSG00000037942 | <i>Crp</i>          | 8.27 | 8.53 | 8.13 | 8.07 |
| ENSMUSG00000037949 | <i>Tmem16k</i>      | 2.44 | 2.9  | 2.45 | 2.49 |
| ENSMUSG00000037957 | <i>Wdr20a</i>       | 2.4  | 2.29 | 2.3  | 2.32 |
| ENSMUSG00000037958 | <i>Ccdc55</i>       | 3.18 | 2.66 | 2.67 | 2.36 |
| ENSMUSG00000037960 | <i>1110007C09Ri</i> | 2.93 | 3.18 | 3.46 | 3.17 |
| ENSMUSG00000037965 | <i>Zc3h7a</i>       | 3.01 | 2.66 | 2.89 | 2.14 |
| ENSMUSG00000037966 | <i>Ninj1</i>        | 6.59 | 7.57 | 6.51 | 6.58 |
| ENSMUSG00000037971 | <i>1110032A03Ri</i> | 3.97 | 3.99 | 4.09 | 3.83 |
| ENSMUSG00000037982 | <i>NA</i>           | 1.95 | 2    | 1.49 | 1.41 |
| ENSMUSG00000037992 | <i>Rara</i>         | 2.33 | 3.68 | 3.23 | 2.81 |
| ENSMUSG00000037993 | <i>Dhx38</i>        | 2.68 | 3.61 | 2.82 | 2.73 |
| ENSMUSG00000037997 | <i>Parp11</i>       | 1.22 | 0.91 | 0.96 | 0.7  |
| ENSMUSG00000037999 | <i>NA</i>           | 2.09 | 1.34 | 1.56 | 0.76 |
| ENSMUSG00000038000 | <i>Acd</i>          | 3.16 | 3.92 | 4.05 | 3.72 |
| ENSMUSG00000038002 | <i>NA</i>           | 1.43 | 1.57 | 1.76 | 1.53 |
| ENSMUSG00000038005 | <i>NA</i>           | 2.81 | 2.23 | 2.49 | 2.17 |
| ENSMUSG00000038007 | <i>Asah3l</i>       | 3.25 | 2.85 | 2.93 | 3.01 |
| ENSMUSG00000038009 | <i>2810451A06Ri</i> | 6.34 | 6.43 | 6.34 | 6.28 |
| ENSMUSG00000038013 | <i>Wipf2</i>        | 2.24 | 2.11 | 2.32 | 1.95 |
| ENSMUSG00000038014 | <i>BC010304</i>     | 5.95 | 5.82 | 5.92 | 5.58 |
| ENSMUSG00000038023 | <i>Atp6v0a2</i>     | 3.75 | 3.65 | 3.84 | 3.47 |
| ENSMUSG00000038024 | <i>Dennd4c</i>      | 2.26 | 1.87 | 2    | 1.89 |
| ENSMUSG00000038025 | <i>Phf2</i>         | 2.67 | 3.33 | 3.03 | 3.04 |
| ENSMUSG00000038028 | <i>9630033F20Ri</i> | 2.09 | 2.36 | 1.82 | 2.08 |
| ENSMUSG00000038034 | <i>Igsf8</i>        | 1.39 | 2.28 | 1.86 | 2.17 |
| ENSMUSG00000038039 | <i>Gcc2</i>         | 3.24 | 2.37 | 2.53 | 2.19 |
| ENSMUSG00000038046 | <i>Rnmtl1</i>       | 2.67 | 2.51 | 2.73 | 2.37 |
| ENSMUSG00000038055 | <i>Dexi</i>         | 3.12 | 3.67 | 3.84 | 3.68 |
| ENSMUSG00000038056 | <i>Mll3</i>         | 2.08 | 1.58 | 2    | 1.61 |

|                    |                     |      |      |      |      |
|--------------------|---------------------|------|------|------|------|
| ENSMUSG00000038058 | <i>Nod1</i>         | 1.58 | 2.22 | 2.09 | 1.6  |
| ENSMUSG00000038068 | <i>Rnf144b</i>      | 4.33 | 3.94 | 3.37 | 3.37 |
| ENSMUSG00000038069 | <i>Cdkn2aip</i>     | 2.81 | 2.45 | 2.94 | 2.49 |
| ENSMUSG00000038072 | <i>Galnt11</i>      | 3.62 | 3.44 | 3.46 | 3.13 |
| ENSMUSG00000038074 | <i>Fkbp14</i>       | 1.22 | 0.67 | 0.52 | 0.34 |
| ENSMUSG00000038079 | <i>Als2cr4</i>      | 1.34 | 0.43 | 0.91 | 0.11 |
| ENSMUSG00000038080 | <i>Aof1</i>         | 3.7  | 2.88 | 3.71 | 3.08 |
| ENSMUSG00000038084 | <i>Opal</i>         | 5.27 | 4.76 | 5.08 | 4.69 |
| ENSMUSG00000038095 | <i>Sbno1</i>        | 3.69 | 3.22 | 3.41 | 3.05 |
| ENSMUSG00000038102 | <i>D030016E14R</i>  | 3.13 | 3.21 | 3.51 | 3.2  |
| ENSMUSG00000038116 | <i>Phf20</i>        | 2.08 | 1.57 | 1.78 | 1.28 |
| ENSMUSG00000038121 | <i>4933403F05Ri</i> | 4.49 | 3.2  | 4.09 | 3.48 |
| ENSMUSG00000038127 | <i>Ccdc50</i>       | 3.41 | 2.35 | 2.82 | 2.09 |
| ENSMUSG00000038145 | <i>Snrk</i>         | 3.78 | 4.11 | 4    | 4.07 |
| ENSMUSG00000038147 | <i>Cd84</i>         | 1.05 | 1.26 | 1.51 | 0.76 |
| ENSMUSG00000038150 | <i>Ormdl3</i>       | 5.52 | 5.74 | 5.54 | 5.26 |
| ENSMUSG00000038160 | <i>Atg5</i>         | 5.33 | 4.58 | 5.25 | 4.66 |
| ENSMUSG00000038167 | <i>Plekhg6</i>      | 1.75 | 2.38 | 2.89 | 2.6  |
| ENSMUSG00000038170 | <i>Pde4dip</i>      | 3.7  | 3.77 | 3.8  | 3.71 |
| ENSMUSG00000038171 | <i>Rbm12</i>        | 1.06 | 1.17 | 0.9  | 0.7  |
| ENSMUSG00000038172 | <i>I810054D07Ri</i> | 2.74 | 1.96 | 2.31 | 1.87 |
| ENSMUSG00000038174 | <i>BC049806</i>     | 3.17 | 1.8  | 2.46 | 1.82 |
| ENSMUSG00000038175 | <i>Myliip</i>       | 3.26 | 3.03 | 3.25 | 3.04 |
| ENSMUSG00000038178 | <i>Slc43a2</i>      | 1.69 | 2.25 | 1.13 | 1.55 |
| ENSMUSG00000038181 | <i>NA</i>           | 2.13 | 3.05 | 2.63 | 2.68 |
| ENSMUSG00000038188 | <i>Scarfl</i>       | 1.46 | 1.87 | 1.5  | 1.32 |
| ENSMUSG00000038193 | <i>Hand2</i>        | 1.93 | 1.78 | 2.02 | 1.8  |
| ENSMUSG00000038195 | <i>Rilp</i>         | 4.19 | 4.55 | 4.6  | 4.38 |
| ENSMUSG00000038206 | <i>Fbxo8</i>        | 5.51 | 4.73 | 5.36 | 4.78 |
| ENSMUSG00000038212 | <i>Hiatl1</i>       | 4.17 | 3.31 | 3.85 | 3.54 |
| ENSMUSG00000038213 | <i>Tapbpl</i>       | 3.46 | 3.74 | 3.38 | 3.2  |

|                    |                     |      |      |      |      |
|--------------------|---------------------|------|------|------|------|
| ENSMUSG00000038215 | <i>BC088983</i>     | 2.15 | 1.44 | 1.94 | 1.55 |
| ENSMUSG00000038217 | <i>2010305C02Ri</i> | 5.63 | 5.42 | 5.23 | 4.54 |
| ENSMUSG00000038224 | <i>Serpinf2</i>     | 8.95 | 9.53 | 9    | 8.95 |
| ENSMUSG00000038225 | <i>Ccdc111</i>      | 1.23 | 0.44 | 1.21 | 0.47 |
| ENSMUSG00000038233 | <i>C730027P07Ri</i> | 2.29 | 1.91 | 1.68 | 0.97 |
| ENSMUSG00000038235 | <i>F11r</i>         | 5.08 | 5.71 | 5.48 | 5.32 |
| ENSMUSG00000038240 | <i>Pdss2</i>        | 3.08 | 3.16 | 3.07 | 2.85 |
| ENSMUSG00000038244 | <i>mKIAA0750</i>    | 2.05 | 2.34 | 1.89 | 1.65 |
| ENSMUSG00000038250 | <i>Usp38</i>        | 4.24 | 3.24 | 3.38 | 3.2  |
| ENSMUSG00000038267 | <i>3110004L20Ri</i> | 4.53 | 4.89 | 4.7  | 4.56 |
| ENSMUSG00000038268 | <i>Ovca2</i>        | 3.55 | 3.72 | 3.41 | 3.28 |
| ENSMUSG00000038274 | <i>Fau</i>          | 2.22 | 3.64 | 3.8  | 3.24 |
| ENSMUSG00000038279 | <i>Noll</i>         | 3.3  | 4.28 | 3.63 | 3.72 |
| ENSMUSG00000038280 | <i>gl</i>           | 2.7  | 2.05 | 2.84 | 2.08 |
| ENSMUSG00000038286 | <i>Bphl</i>         | 7.63 | 6.93 | 7.53 | 7.03 |
| ENSMUSG00000038290 | <i>Smg6</i>         | 2.79 | 2.86 | 3.07 | 2.65 |
| ENSMUSG00000038291 | <i>Snx25</i>        | 2.56 | 2.67 | 2.7  | 2.37 |
| ENSMUSG00000038298 | <i>Pdzk1</i>        | 5.23 | 5.53 | 5.12 | 5.09 |
| ENSMUSG00000038299 | <i>Wdr36</i>        | 4    | 3.46 | 3.98 | 3.4  |
| ENSMUSG00000038301 | <i>Snx10</i>        | 4.71 | 3.05 | 3.83 | 3.49 |
| ENSMUSG00000038302 | <i>Lace1</i>        | 3.22 | 2.39 | 3.35 | 2.96 |
| ENSMUSG00000038312 | <i>Edem2</i>        | 4.83 | 5.32 | 4.87 | 4.87 |
| ENSMUSG00000038323 | <i>NA</i>           | 3.38 | 2.49 | 2.68 | 2.28 |
| ENSMUSG00000038324 | <i>Trpc4ap</i>      | 5.76 | 6.13 | 5.81 | 5.61 |
| ENSMUSG00000038332 | <i>Sesn1</i>        | 2.61 | 2.5  | 2.68 | 2.25 |
| ENSMUSG00000038335 | <i>Tsr1</i>         | 5.08 | 5.06 | 4.84 | 4.62 |
| ENSMUSG00000038342 | <i>Mlxip</i>        | 1.56 | 1.72 | 1.22 | 1.22 |
| ENSMUSG00000038344 | <i>4932441K18Ri</i> | 2.1  | 1.08 | 1.61 | 1.04 |
| ENSMUSG00000038346 | <i>Zfp384</i>       | 2.23 | 2.48 | 2.58 | 2.2  |
| ENSMUSG00000038351 | <i>Sgsm2</i>        | 1.76 | 1.91 | 1.31 | 1.28 |
| ENSMUSG00000038365 | <i>Fbxo25</i>       | 2.36 | 2.18 | 2.08 | 1.82 |

|                    |                     |      |      |      |      |
|--------------------|---------------------|------|------|------|------|
| ENSMUSG00000038366 | <i>Laspl</i>        | 5.14 | 5.31 | 4.95 | 4.7  |
| ENSMUSG00000038368 | <i>BC057079</i>     | 1.08 | 1.1  | 0.94 | 0.76 |
| ENSMUSG00000038369 | <i>Ncoa6</i>        | 2.69 | 2.57 | 2.87 | 2.54 |
| ENSMUSG00000038370 | <i>Pcp4l1</i>       | 6.27 | 6.07 | 5.97 | 5.85 |
| ENSMUSG00000038371 | <i>NA</i>           | 3.29 | 2.51 | 3.07 | 2.49 |
| ENSMUSG00000038374 | <i>Rbm8a</i>        | 4.56 | 4.47 | 4.19 | 4.29 |
| ENSMUSG00000038375 | <i>Trp53inp2</i>    | 7.16 | 7.55 | 7.03 | 6.87 |
| ENSMUSG00000038383 | <i>Pigu</i>         | 3.79 | 3.62 | 3.27 | 3.33 |
| ENSMUSG00000038384 | <i>NA</i>           | 2.43 | 3.64 | 2.96 | 2.81 |
| ENSMUSG00000038387 | <i>Rras</i>         | 4.49 | 5.14 | 4.4  | 4.49 |
| ENSMUSG00000038388 | <i>Mpp6</i>         | 5.84 | 5.17 | 5.2  | 4.83 |
| ENSMUSG00000038393 | <i>Txnip</i>        | 5.89 | 5.46 | 5.26 | 5.5  |
| ENSMUSG00000038398 | <i>Upf3a</i>        | 2.6  | 3.25 | 2.99 | 2.53 |
| ENSMUSG00000038403 | <i>NA</i>           | 5.25 | 5.29 | 5.02 | 4.15 |
| ENSMUSG00000038406 | <i>Scaf1</i>        | 3.27 | 4.16 | 3.64 | 3.51 |
| ENSMUSG00000038412 | <i>Higd1a</i>       | 3.99 | 3.46 | 4.61 | 5.22 |
| ENSMUSG00000038415 | <i>Foxq1</i>        | 2.69 | 3.52 | 2.23 | 2.52 |
| ENSMUSG00000038416 | <i>Cdc16</i>        | 3.86 | 3.65 | 3.83 | 3.2  |
| ENSMUSG00000038417 | <i>Fig4</i>         | 2.86 | 2.7  | 2.75 | 2.24 |
| ENSMUSG00000038418 | <i>Egr1</i>         | 1    | 0.79 | 2.8  | 1.9  |
| ENSMUSG00000038422 | <i>Hdhd3</i>        | 3.64 | 4.37 | 3.97 | 4.28 |
| ENSMUSG00000038425 | <i>Poli</i>         | 1.53 | 1.82 | 1.24 | 1.37 |
| ENSMUSG00000038429 | <i>Usp5</i>         | 4.44 | 5.14 | 4.65 | 4.54 |
| ENSMUSG00000038437 | <i>Mllt6</i>        | 1.77 | 2.3  | 2.03 | 1.99 |
| ENSMUSG00000038446 | <i>NA</i>           | 3.82 | 3.23 | 3.88 | 3.38 |
| ENSMUSG00000038451 | <i>Spsb2</i>        | 2.21 | 2.9  | 2.88 | 2.67 |
| ENSMUSG00000038459 | <i>2210412D01R1</i> | 5.87 | 5.82 | 5.61 | 5.35 |
| ENSMUSG00000038462 | <i>Uqcrls1</i>      | 7.38 | 7.59 | 7.64 | 7.3  |
| ENSMUSG00000038467 | <i>Chmp4b</i>       | 5.25 | 6.01 | 5.48 | 5.18 |
| ENSMUSG00000038481 | <i>mKIAA1028</i>    | 1.65 | 0.49 | 1.38 | 0.73 |
| ENSMUSG00000038482 | <i>Tfdp1</i>        | 2.32 | 2.39 | 2.47 | 1.91 |



|                    |                     |      |      |      |      |
|--------------------|---------------------|------|------|------|------|
| ENSMUSG00000038485 | <i>Socs7</i>        | 2.08 | 1.89 | 1.71 | 1.77 |
| ENSMUSG00000038489 | <i>NA</i>           | 1.08 | 2.49 | 1.88 | 2.08 |
| ENSMUSG00000038495 | <i>Otud7b</i>       | 2.69 | 2.52 | 2.59 | 2.6  |
| ENSMUSG00000038497 | <i>Tmco3</i>        | 1.78 | 1.69 | 1.63 | 1.15 |
| ENSMUSG00000038500 | <i>Prr3</i>         | 0.82 | 1.45 | 1.79 | 1.11 |
| ENSMUSG00000038502 | <i>Ptov1</i>        | 4.3  | 5.25 | 4.82 | 4.69 |
| ENSMUSG00000038503 | <i>Mesdc2</i>       | 4.77 | 5.37 | 4.64 | 4.58 |
| ENSMUSG00000038506 | <i>Dcun1d2</i>      | 2.83 | 2.46 | 2.99 | 3.04 |
| ENSMUSG00000038507 | <i>Parp12</i>       | 4.02 | 3.3  | 3.82 | 3.78 |
| ENSMUSG00000038508 | <i>Gdf15</i>        | 0.57 | 1.58 | 1.11 | 0.6  |
| ENSMUSG00000038510 | <i>Bxdc1</i>        | 2.09 | 1.14 | 1.73 | 1.67 |
| ENSMUSG00000038515 | <i>Grtp1</i>        | 3.79 | 3.82 | 3.91 | 3.68 |
| ENSMUSG00000038517 | <i>Tbkbp1</i>       | 1.25 | 2.21 | 2.39 | 1.8  |
| ENSMUSG00000038518 | <i>Jarid2</i>       | 1.6  | 1.42 | 1.73 | 1.45 |
| ENSMUSG00000038520 | <i>Tbc1d17</i>      | 3.91 | 4.42 | 4.49 | 4.3  |
| ENSMUSG00000038521 | <i>C1s</i>          | 6.79 | 6.67 | 6.51 | 6.58 |
| ENSMUSG00000038522 | <i>AI317395</i>     | 5.08 | 4.95 | 5.14 | 4.81 |
| ENSMUSG00000038525 | <i>Armc10</i>       | 1.27 | 0.8  | 1.44 | 0.59 |
| ENSMUSG00000038526 | <i>Car14</i>        | 5.72 | 4.86 | 5.85 | 4.83 |
| ENSMUSG00000038527 | <i>C1rl</i>         | 6.05 | 6.37 | 6.28 | 6.21 |
| ENSMUSG00000038530 | <i>Rgs4</i>         | 1.08 | 1.02 | 1.54 | 1.6  |
| ENSMUSG00000038533 | <i>Cbfa2t2</i>      | 1.74 | 1.51 | 1.86 | 1.56 |
| ENSMUSG00000038535 | <i>Suhw4</i>        | 2.31 | 1.39 | 2.1  | 1.55 |
| ENSMUSG00000038538 | <i>D130059P03R</i>  | 1.29 | 1.38 | 1.53 | 1.44 |
| ENSMUSG00000038539 | <i>Atf5</i>         | 7.53 | 7.91 | 7.65 | 7.5  |
| ENSMUSG00000038542 | <i>Pcid2</i>        | 3.07 | 3.29 | 2.85 | 2.78 |
| ENSMUSG00000038544 | <i>I110054O05Ri</i> | 1.46 | 0.83 | 0.83 | 0.49 |
| ENSMUSG00000038546 | <i>Ranbp9</i>       | 4.08 | 3.99 | 3.76 | 3.65 |
| ENSMUSG00000038550 | <i>Gm129</i>        | 1.72 | 1.07 | 2.97 | 2.95 |
| ENSMUSG00000038552 | <i>Fndc4</i>        | 4.52 | 4.61 | 4.51 | 4.37 |
| ENSMUSG00000038563 | <i>Eftud1</i>       | 2.17 | 2.36 | 2.31 | 2.14 |

|                    |                     |      |      |      |      |
|--------------------|---------------------|------|------|------|------|
| ENSMUSG00000038564 | <i>Ift172</i>       | 1.64 | 2.09 | 1.77 | 1.73 |
| ENSMUSG00000038569 | <i>Rad9b</i>        | 3.65 | 2.2  | 3.55 | 2.68 |
| ENSMUSG00000038576 | <i>Susd4</i>        | 2.02 | 2.55 | 1    | 2.53 |
| ENSMUSG00000038578 | <i>NA</i>           | 1.63 | 1.66 | 1.11 | 1.18 |
| ENSMUSG00000038582 | <i>Pptc7</i>        | 4.62 | 3.64 | 4.44 | 3.93 |
| ENSMUSG00000038591 | <i>Colec10</i>      | 5.09 | 4.09 | 4.2  | 3.89 |
| ENSMUSG00000038594 | <i>NA</i>           | 3.3  | 2.82 | 3.43 | 3.34 |
| ENSMUSG00000038604 | <i>2310066E14Ri</i> | 1.9  | 2.36 | 1.89 | 1.89 |
| ENSMUSG00000038607 | <i>Gng10</i>        | 4.18 | 2.52 | 3.09 | 2.71 |
| ENSMUSG00000038611 | <i>AA673488</i>     | 2.54 | 2.89 | 2.6  | 2.68 |
| ENSMUSG00000038612 | <i>Mcl1</i>         | 5.64 | 5.17 | 6.02 | 5.42 |
| ENSMUSG00000038615 | <i>Nfe2l1</i>       | 5.43 | 5.55 | 5.35 | 5.07 |
| ENSMUSG00000038618 | <i>Rassf7</i>       | 3.82 | 4.49 | 4.08 | 3.74 |
| ENSMUSG00000038619 | <i>Ensa</i>         | 3.93 | 3.91 | 3.97 | 3.68 |
| ENSMUSG00000038622 | <i>Med30</i>        | 2.67 | 2.21 | 2.44 | 1.8  |
| ENSMUSG00000038628 | <i>Polr3k</i>       | 3.28 | 2.63 | 3    | 2.57 |
| ENSMUSG00000038633 | <i>Degs1</i>        | 6.25 | 5.34 | 5.79 | 5.54 |
| ENSMUSG00000038637 | <i>Lrrc56</i>       | 0.63 | 0.99 | 1.4  | 0.9  |
| ENSMUSG00000038641 | <i>Akr1d1</i>       | 7.51 | 6.54 | 7.07 | 6.43 |
| ENSMUSG00000038642 | <i>Ctss</i>         | 5.24 | 3.82 | 4.76 | 4.27 |
| ENSMUSG00000038646 | <i>2610204K14Ri</i> | 1.89 | 0.98 | 1.77 | 1.3  |
| ENSMUSG00000038648 | <i>Creb3l2</i>      | 2.24 | 2.97 | 2.33 | 2.66 |
| ENSMUSG00000038650 | <i>Rnh1</i>         | 5.77 | 5.86 | 5.86 | 5.75 |
| ENSMUSG00000038656 | <i>Cyp3a16</i>      | 8.63 | 4.8  | 6.45 | 4.01 |
| ENSMUSG00000038658 | <i>C030046E11Ri</i> | 2.99 | 2.37 | 2.98 | 2.63 |
| ENSMUSG00000038664 | <i>NA</i>           | 2.03 | 2.08 | 2.17 | 1.57 |
| ENSMUSG00000038671 | <i>Arfrp1</i>       | 3.79 | 3.81 | 3.47 | 3.5  |
| ENSMUSG00000038683 | <i>Pak1ip1</i>      | 4.55 | 4.67 | 4.71 | 4.53 |
| ENSMUSG00000038685 | <i>Rtel1</i>        | 1.77 | 1.89 | 1.79 | 1.56 |
| ENSMUSG00000038690 | <i>AK164124</i>     | 8.27 | 6.68 | 8.27 | 8.4  |
| ENSMUSG00000038695 | <i>Josd2</i>        | 2.64 | 3.96 | 3.54 | 3.18 |

|                    |                     |      |       |      |       |
|--------------------|---------------------|------|-------|------|-------|
| ENSMUSG00000038696 | <i>Mapkap1</i>      | 4.31 | 4.08  | 4.33 | 3.93  |
| ENSMUSG00000038697 | <i>Taf5l</i>        | 2.96 | 2.84  | 2.69 | 2.43  |
| ENSMUSG00000038704 | <i>0610012D14Ri</i> | 6.4  | 7.02  | 6.87 | 6.7   |
| ENSMUSG00000038705 | <i>Gmeb2</i>        | 2.49 | 2.55  | 2.55 | 2.34  |
| ENSMUSG00000038708 | <i>Golga4</i>       | 4.12 | 4.01  | 3.79 | 3.6   |
| ENSMUSG00000038712 | <i>4930504E06Ri</i> | 5.17 | 5.64  | 5.59 | 5.35  |
| ENSMUSG00000038722 | <i>Bud3l</i>        | 5.76 | 5.49  | 5.89 | 5.78  |
| ENSMUSG00000038733 | <i>Wdr26</i>        | 5.14 | 4.66  | 4.67 | 4.5   |
| ENSMUSG00000038736 | <i>Nudcd1</i>       | 2.74 | 1.82  | 2.13 | 2.13  |
| ENSMUSG00000038742 | <i>Angptl6</i>      | 3.23 | 3.9   | 3.59 | 3.76  |
| ENSMUSG00000038745 | <i>Nlrp6</i>        | 4.89 | 5.42  | 4.97 | 4.93  |
| ENSMUSG00000038754 | <i>Elovl3</i>       | 2.34 | 1.11  | 0.52 | -0.06 |
| ENSMUSG00000038759 | <i>NA</i>           | 1.54 | 1.48  | 1.67 | 1.29  |
| ENSMUSG00000038762 | <i>Abcf1</i>        | 4.6  | 5.34  | 4.97 | 4.74  |
| ENSMUSG00000038764 | <i>Ptpn3</i>        | 3.09 | 3.17  | 3.19 | 2.95  |
| ENSMUSG00000038766 | <i>Gabpb2</i>       | 2.55 | 2.1   | 2.25 | 1.96  |
| ENSMUSG00000038768 | <i>9130409I23Ri</i> | 3.48 | 1.77  | 3.14 | 2.19  |
| ENSMUSG00000038773 | <i>Jmjd1b</i>       | 2.24 | 2.36  | 2.32 | 1.95  |
| ENSMUSG00000038774 | <i>NA</i>           | 2.77 | 2.16  | 2.57 | 2.2   |
| ENSMUSG00000038776 | <i>Ephx1</i>        | 7.6  | 8.31  | 7.91 | 7.98  |
| ENSMUSG00000038780 | <i>Smurf1</i>       | 2.23 | 2.59  | 2.69 | 2.52  |
| ENSMUSG00000038781 | <i>Stap2</i>        | 4.5  | 4.89  | 4.9  | 4.65  |
| ENSMUSG00000038784 | <i>Cnot4</i>        | 2.55 | 2.09  | 2.56 | 2.41  |
| ENSMUSG00000038803 | <i>2310016E02Ri</i> | 4.75 | 5.02  | 5.03 | 5.19  |
| ENSMUSG00000038806 | <i>BC031781</i>     | 2.69 | 2.25  | 2.55 | 2.53  |
| ENSMUSG00000038811 | <i>Gngt2</i>        | 1.45 | 1.29  | 1.36 | 1.13  |
| ENSMUSG00000038812 | <i>0610038D11Ri</i> | 1.76 | 2.45  | 2.01 | 1.91  |
| ENSMUSG00000038827 | <i>BC026590</i>     | 1.27 | 1.23  | 1.12 | 1.1   |
| ENSMUSG00000038828 | <i>1110039B18Ri</i> | 4.87 | 5.55  | 4.9  | 4.78  |
| ENSMUSG00000038831 | <i>Ralgps1</i>      | 1.34 | -0.13 | 0.45 | 0.21  |
| ENSMUSG00000038838 | <i>Vars2</i>        | 2.77 | 3.3   | 2.83 | 2.71  |

|                    |                     |      |      |      |      |
|--------------------|---------------------|------|------|------|------|
| ENSMUSG00000038844 | <i>Kif16b</i>       | 2.16 | 1.44 | 1.81 | 1.39 |
| ENSMUSG00000038845 | <i>Phb</i>          | 2.57 | 2    | 2.25 | 1.74 |
| ENSMUSG00000038848 | <i>Ythdf1</i>       | 4.49 | 4.08 | 4.24 | 4.12 |
| ENSMUSG00000038859 | <i>Baiap2l1</i>     | 4.88 | 4.26 | 4.89 | 4.38 |
| ENSMUSG00000038861 | <i>Pi4kb</i>        | 3.98 | 4.24 | 3.99 | 4    |
| ENSMUSG00000038866 | <i>NA</i>           | 3.47 | 3.15 | 3.3  | 2.9  |
| ENSMUSG00000038871 | <i>Bpgm</i>         | 3.15 | 3.26 | 3.51 | 3.65 |
| ENSMUSG00000038872 | <i>Zfhx3</i>        | 0.79 | 0.48 | 1.43 | 0.96 |
| ENSMUSG00000038876 | <i>Rnf146</i>       | 4.31 | 3.93 | 3.9  | 4.01 |
| ENSMUSG00000038880 | <i>Mrps34</i>       | 4.91 | 5.23 | 5.3  | 5.4  |
| ENSMUSG00000038884 | <i>A230050P20R1</i> | 3.39 | 3.72 | 3.46 | 3.5  |
| ENSMUSG00000038886 | <i>Man2a2</i>       | 2.9  | 3.13 | 2.39 | 2.75 |
| ENSMUSG00000038888 | <i>Atpbd3</i>       | 1.43 | 1.91 | 1.21 | 1.41 |
| ENSMUSG00000038894 | <i>Irs2</i>         | 2.35 | 2.64 | 2.3  | 1.98 |
| ENSMUSG00000038895 | <i>Zfp653</i>       | 1.21 | 1.48 | 0.97 | 1.48 |
| ENSMUSG00000038902 | <i>Pogz</i>         | 1.79 | 2.03 | 2.2  | 1.99 |
| ENSMUSG00000038903 | <i>Ccdc68</i>       | 1.07 | 1.25 | 1.28 | 1.5  |
| ENSMUSG00000038909 | <i>Myst2</i>        | 3.95 | 3.82 | 3.67 | 3.6  |
| ENSMUSG00000038910 | <i>Plcl2</i>        | 2.82 | 2.7  | 3.08 | 2.55 |
| ENSMUSG00000038914 | <i>Didol</i>        | 1.8  | 1.67 | 1.97 | 1.88 |
| ENSMUSG00000038949 | <i>9630058J23R1</i> | 2.49 | 2.22 | 2.77 | 2.07 |
| ENSMUSG00000038954 | <i>Supt3h</i>       | 2.5  | 2.31 | 1.82 | 1.41 |
| ENSMUSG00000038957 | <i>Edc3</i>         | 2.92 | 3.17 | 2.56 | 2.65 |
| ENSMUSG00000038965 | <i>Ube2l3</i>       | 5.77 | 5.61 | 5.51 | 5.22 |
| ENSMUSG00000038967 | <i>Pdk2</i>         | 6.79 | 6.94 | 7.55 | 7.14 |
| ENSMUSG00000038970 | <i>Lmtk2</i>        | 2.41 | 2.37 | 2.66 | 2.3  |
| ENSMUSG00000038975 | <i>Rabggtb</i>      | 5.07 | 4.75 | 5.14 | 5.01 |
| ENSMUSG00000038976 | <i>Ppp1r9b</i>      | 1.64 | 2.11 | 2.1  | 1.59 |
| ENSMUSG00000038982 | <i>Muted</i>        | 4.3  | 4.18 | 4.11 | 3.82 |
| ENSMUSG00000038990 | <i>Cables2</i>      | 3.55 | 3.89 | 3.54 | 3.37 |
| ENSMUSG00000038991 | <i>Txndc5</i>       | 6.07 | 6.55 | 5.55 | 5.75 |

|                    |                     |      |      |      |      |
|--------------------|---------------------|------|------|------|------|
| ENSMUSG00000039000 | <i>mKIAA0010</i>    | 4.48 | 3.9  | 4.17 | 3.73 |
| ENSMUSG00000039001 | <i>Rps21</i>        | 5.74 | 4.34 | 5.85 | 6.65 |
| ENSMUSG00000039004 | <i>Bmp6</i>         | 2.07 | 2.08 | 1.67 | 1.5  |
| ENSMUSG00000039007 | <i>HLS2</i>         | 5.6  | 5.29 | 5.3  | 5.04 |
| ENSMUSG00000039016 | <i>Timm8b</i>       | 5.5  | 5.4  | 5.74 | 5.59 |
| ENSMUSG00000039018 | <i>Mtg1</i>         | 3.3  | 3.32 | 3.39 | 3.36 |
| ENSMUSG00000039031 | <i>Arhgap18</i>     | 2.35 | 1.59 | 2.24 | 1.59 |
| ENSMUSG00000039033 | <i>Tasp1</i>        | 1.16 | 1.72 | 1.47 | 1.12 |
| ENSMUSG00000039041 | <i>Adrm1</i>        | 2.77 | 3.59 | 3.41 | 3.11 |
| ENSMUSG00000039043 | <i>2610034B18Ri</i> | 2.21 | 2.28 | 2.48 | 1.92 |
| ENSMUSG00000039046 | <i>Usp6nl</i>       | 2.71 | 1.89 | 2.29 | 2.14 |
| ENSMUSG00000039047 | <i>Ptgk</i>         | 4.18 | 3.86 | 3.98 | 3.66 |
| ENSMUSG00000039048 | <i>Foxred1</i>      | 3.78 | 3.84 | 3.98 | 3.72 |
| ENSMUSG00000039050 | <i>Osdbl2</i>       | 4.2  | 4.13 | 4.43 | 4.15 |
| ENSMUSG00000039055 | <i>Eme1</i>         | 1.77 | 1.17 | 1.48 | 1.28 |
| ENSMUSG00000039062 | <i>Anpep</i>        | 5.88 | 6.37 | 6.16 | 6.16 |
| ENSMUSG00000039063 | <i>Echdc3</i>       | 6.1  | 6.15 | 6.18 | 5.74 |
| ENSMUSG00000039065 | <i>A930016P21Ri</i> | 1.92 | 2.93 | 2.55 | 2.24 |
| ENSMUSG00000039067 | <i>Psmc7</i>        | 5.95 | 6.29 | 5.87 | 5.6  |
| ENSMUSG00000039068 | <i>Zzz3</i>         | 2    | 1.84 | 1.93 | 1.72 |
| ENSMUSG00000039069 | <i>Gtpbp5</i>       | 3.4  | 3.98 | 3.62 | 3.59 |
| ENSMUSG00000039087 | <i>Rreb1</i>        | 2.79 | 3.01 | 2.83 | 2.86 |
| ENSMUSG00000039089 | <i>L3mbtl3</i>      | 0.91 | 0.88 | 1.62 | 1.19 |
| ENSMUSG00000039096 | <i>Rsad1</i>        | 0.96 | 0.67 | 1.2  | 0.87 |
| ENSMUSG00000039100 | <i>6-Mar</i>        | 6    | 5.36 | 5.54 | 5.03 |
| ENSMUSG00000039105 | <i>Atp6v1g1</i>     | 4.19 | 3.33 | 3.77 | 2.76 |
| ENSMUSG00000039108 | <i>Lsm14b</i>       | 3.7  | 3.71 | 3.61 | 3.37 |
| ENSMUSG00000039114 | <i>Nrn1</i>         | 8.19 | 7.74 | 8.1  | 7.92 |
| ENSMUSG00000039115 | <i>Itga9</i>        | 2.7  | 2.94 | 2.1  | 1.96 |
| ENSMUSG00000039117 | <i>Taf4a</i>        | 2.35 | 2.37 | 2.49 | 2.14 |
| ENSMUSG00000039128 | <i>Cdc123</i>       | 4.87 | 5.03 | 4.8  | 4.72 |

|                    |                     |      |      |      |      |
|--------------------|---------------------|------|------|------|------|
| ENSMUSG00000039130 | <i>Zc3hc1</i>       | 2.71 | 2.91 | 2.79 | 2.95 |
| ENSMUSG00000039145 | <i>Camk1d</i>       | 4.32 | 3.9  | 3.67 | 3.2  |
| ENSMUSG00000039148 | <i>Sart1</i>        | 2.76 | 3.12 | 2.92 | 2.6  |
| ENSMUSG00000039156 | <i>Stim2</i>        | 2.66 | 2.41 | 2.49 | 2.5  |
| ENSMUSG00000039157 | <i>C230093N12R</i>  | 1.93 | 2.58 | 2.82 | 2.65 |
| ENSMUSG00000039159 | <i>Ube2h</i>        | 3.25 | 2.13 | 3.01 | 2.63 |
| ENSMUSG00000039163 | <i>2010110K16Ri</i> | 4.86 | 4.39 | 4.98 | 4.4  |
| ENSMUSG00000039166 | <i>Akap7</i>        | 1.76 | 1.18 | 1.54 | 0.75 |
| ENSMUSG00000039167 | <i>Eltf1</i>        | 3.16 | 2.31 | 2.28 | 2.15 |
| ENSMUSG00000039168 | <i>Dap</i>          | 7.79 | 7.99 | 7.59 | 7.53 |
| ENSMUSG00000039176 | <i>Polg</i>         | 3.96 | 4.22 | 4.08 | 3.75 |
| ENSMUSG00000039178 | <i>Tbc1d19</i>      | 0.82 | 0.69 | 1.59 | 1.05 |
| ENSMUSG00000039182 | <i>AW209491</i>     | 3.75 | 3.13 | 3.48 | 3.43 |
| ENSMUSG00000039183 | <i>Nubp2</i>        | 4.57 | 5.22 | 4.77 | 4.83 |
| ENSMUSG00000039187 | <i>Fanci</i>        | 1.69 | 0.65 | 1.37 | 0.75 |
| ENSMUSG00000039191 | <i>Rbpj</i>         | 1.03 | 0.92 | 0.62 | 0.06 |
| ENSMUSG00000039195 | <i>I110008P14Ri</i> | 4.69 | 5.71 | 5.02 | 5.1  |
| ENSMUSG00000039196 | <i>Orm1</i>         | 9.14 | 8.55 | 9.02 | 8.95 |
| ENSMUSG00000039197 | <i>Adk</i>          | 9.06 | 8.57 | 9.04 | 8.61 |
| ENSMUSG00000039199 | <i>Zdhhc1</i>       | 0.15 | 1.18 | 1.11 | 0.72 |
| ENSMUSG00000039201 | <i>Tbc1d25</i>      | 1.13 | 1.62 | 1.11 | 1.68 |
| ENSMUSG00000039202 | <i>Abhd2</i>        | 6.16 | 6.4  | 5.45 | 5.58 |
| ENSMUSG00000039205 | <i>Ciz1</i>         | 2.86 | 3.27 | 3.14 | 2.8  |
| ENSMUSG00000039206 | <i>Daglb</i>        | 2.38 | 2.95 | 2.83 | 2.62 |
| ENSMUSG00000039210 | <i>Gpatch2</i>      | 2.23 | 2.41 | 2.13 | 1.64 |
| ENSMUSG00000039217 | <i>Il18</i>         | 4.68 | 3.37 | 3.91 | 3.08 |
| ENSMUSG00000039218 | <i>Srrm2</i>        | 5    | 5.31 | 5.13 | 4.91 |
| ENSMUSG00000039219 | <i>Arid4b</i>       | 2.98 | 1.38 | 2.38 | 1.83 |
| ENSMUSG00000039220 | <i>Ppp1r10</i>      | 2.84 | 2.66 | 3.72 | 3.97 |
| ENSMUSG00000039221 | <i>Rpl22l1</i>      | 4.79 | 1.48 | 3.61 | 3.04 |
| ENSMUSG00000039230 | <i>Tbcd</i>         | 2.96 | 3.48 | 3.09 | 2.9  |

|                    |                     |      |      |      |      |
|--------------------|---------------------|------|------|------|------|
| ENSMUSG00000039231 | <i>Suv39h1</i>      | 2.43 | 2.19 | 2.07 | 1.6  |
| ENSMUSG00000039233 | <i>Tbce</i>         | 3.24 | 2.97 | 2.78 | 2.55 |
| ENSMUSG00000039234 | <i>Sec24d</i>       | 5.25 | 5.31 | 4.94 | 4.66 |
| ENSMUSG00000039236 | <i>Isg20</i>        | 0.11 | 0.44 | 1.05 | 1.19 |
| ENSMUSG00000039238 | <i>Zfp750</i>       | 1.61 | 1.74 | 1.81 | 2.12 |
| ENSMUSG00000039242 | <i>B3galnt2</i>     | 3.27 | 3.19 | 3.42 | 2.82 |
| ENSMUSG00000039244 | <i>E130309D02R</i>  | 3.64 | 3.96 | 3.72 | 3.75 |
| ENSMUSG00000039246 | <i>Lypl1</i>        | 5.16 | 4.22 | 4.8  | 4.07 |
| ENSMUSG00000039253 | <i>BC032265</i>     | 2.16 | 2.27 | 2.69 | 2.54 |
| ENSMUSG00000039254 | <i>Pomt1</i>        | 3.34 | 3.48 | 3.19 | 3.1  |
| ENSMUSG00000039262 | <i>5830434P21Ri</i> | 3.11 | 3.7  | 3.31 | 3.39 |
| ENSMUSG00000039263 | <i>Npepl1</i>       | 4.88 | 5.47 | 5.07 | 4.96 |
| ENSMUSG00000039270 | <i>Megf9</i>        | 5.4  | 4.11 | 4.18 | 3.39 |
| ENSMUSG00000039275 | <i>Foxk2</i>        | 2.36 | 2.58 | 2.16 | 2.79 |
| ENSMUSG00000039282 | <i>Shprh</i>        | 1.67 | 0.88 | 1.44 | 0.74 |
| ENSMUSG00000039285 | <i>Azi2</i>         | 4.12 | 3.89 | 3.82 | 3.53 |
| ENSMUSG00000039286 | <i>Fndc3b</i>       | 2.73 | 2.43 | 1.85 | 1.72 |
| ENSMUSG00000039294 | <i>BC017643</i>     | 2.71 | 2.61 | 2.43 | 1.97 |
| ENSMUSG00000039307 | <i>Hexdc</i>        | 1.08 | 1.55 | 1.85 | 1.27 |
| ENSMUSG00000039308 | <i>Ndst2</i>        | 3.32 | 3.61 | 3.21 | 2.94 |
| ENSMUSG00000039318 | <i>NA</i>           | 2.93 | 2.77 | 2.55 | 2.37 |
| ENSMUSG00000039323 | <i>Igfbp2</i>       | 7.79 | 8.63 | 8.06 | 8.36 |
| ENSMUSG00000039345 | <i>BC024814</i>     | 2.95 | 3.15 | 2.49 | 2.81 |
| ENSMUSG00000039349 | <i>C130074G19R</i>  | 6.35 | 6.42 | 6.29 | 6.18 |
| ENSMUSG00000039354 | <i>Smarcal1</i>     | 2.65 | 3.1  | 2.59 | 2.76 |
| ENSMUSG00000039356 | <i>Exosc2</i>       | 2.94 | 3.69 | 2.98 | 3.18 |
| ENSMUSG00000039357 | <i>Fut11</i>        | 1.28 | 0.78 | 0.73 | 0.48 |
| ENSMUSG00000039361 | <i>mKIAA4114</i>    | 5.75 | 4.77 | 5.35 | 4.99 |
| ENSMUSG00000039367 | <i>Sec24c</i>       | 5.08 | 5.36 | 5.06 | 4.85 |
| ENSMUSG00000039377 | <i>Hlx</i>          | 0.63 | 1.54 | 1.34 | 1.74 |
| ENSMUSG00000039382 | <i>Wdr45</i>        | 4.7  | 4.97 | 4.69 | 4.81 |

|                    |                    |      |      |      |      |
|--------------------|--------------------|------|------|------|------|
| ENSMUSG00000039395 | <i>Mreg</i>        | 4.83 | 4.68 | 4.78 | 4.33 |
| ENSMUSG00000039405 | <i>Prss23</i>      | 1.07 | 0.88 | 0.85 | 0.51 |
| ENSMUSG00000039414 | <i>Heatr5b</i>     | 1.76 | 1.55 | 1.9  | 1.69 |
| ENSMUSG00000039427 | <i>Alg1</i>        | 4.2  | 4.65 | 4.25 | 4.21 |
| ENSMUSG00000039428 | <i>Tmem135</i>     | 5.08 | 4.08 | 4.38 | 4.06 |
| ENSMUSG00000039431 | <i>Mtmr7</i>       | 1.41 | 1.23 | 1.73 | 1.23 |
| ENSMUSG00000039438 | <i>BC021608</i>    | 8.27 | 9    | 9    | 8.86 |
| ENSMUSG00000039449 | <i>Prpf18</i>      | 3.85 | 3.49 | 3.84 | 3.29 |
| ENSMUSG00000039450 | <i>Dcxr</i>        | 6.95 | 7.69 | 7.41 | 7    |
| ENSMUSG00000039452 | <i>Snx22</i>       | 5.57 | 5.88 | 5.51 | 5.33 |
| ENSMUSG00000039456 | <i>mKIAA0136</i>   | 2.26 | 1.68 | 2.44 | 2.26 |
| ENSMUSG00000039457 | <i>Ppl</i>         | 2.38 | 2.79 | 2.66 | 2.17 |
| ENSMUSG00000039458 | <i>Mtmr12</i>      | 1.8  | 1.94 | 1.49 | 1.23 |
| ENSMUSG00000039461 | <i>Tcta</i>        | 4.19 | 3.95 | 3.95 | 3.72 |
| ENSMUSG00000039463 | <i>NHE8</i>        | 3.81 | 4.39 | 3.77 | 3.69 |
| ENSMUSG00000039473 | <i>Ubn1</i>        | 3.36 | 3.58 | 3.32 | 3.25 |
| ENSMUSG00000039474 | <i>Wfs1</i>        | 1.65 | 2.76 | 2.3  | 2.06 |
| ENSMUSG00000039477 | <i>Zfp469</i>      | 1.12 | 2.34 | 1.84 | 1.95 |
| ENSMUSG00000039480 | <i>Nt5dc1</i>      | 3.56 | 2.54 | 3.05 | 2.57 |
| ENSMUSG00000039483 | <i>Asb6</i>        | 1.35 | 1.89 | 1.3  | 1.08 |
| ENSMUSG00000039485 | <i>Tspyl4</i>      | 2.14 | 2.24 | 2.09 | 1.15 |
| ENSMUSG00000039497 | <i>Dse</i>         | 2.18 | 1.62 | 1.24 | 1.39 |
| ENSMUSG00000039501 | <i>Znfx1</i>       | 3.09 | 3.47 | 3.18 | 3.28 |
| ENSMUSG00000039509 | <i>Nup133</i>      | 2.14 | 2.47 | 2.85 | 2.43 |
| ENSMUSG00000039512 | <i>F830021D11R</i> | 2.29 | 2.45 | 2.51 | 2.03 |
| ENSMUSG00000039515 | <i>Ppp2r4</i>      | 4.74 | 5.35 | 4.79 | 4.53 |
| ENSMUSG00000039519 | <i>Cyp7b1</i>      | 4.73 | 4.21 | 4.16 | 3.74 |
| ENSMUSG00000039523 | <i>BC046331</i>    | 1.84 | 2.26 | 2.11 | 1.96 |
| ENSMUSG00000039529 | <i>Atp8b1</i>      | 2.96 | 3.15 | 3.24 | 2.99 |
| ENSMUSG00000039530 | <i>Tusc3</i>       | 2.63 | 2.54 | 3.24 | 2.68 |
| ENSMUSG00000039531 | <i>2700019D07R</i> | 1.24 | 1.07 | 1.23 | 0.69 |



|                    |                    |       |      |      |      |
|--------------------|--------------------|-------|------|------|------|
| ENSMUSG00000039533 | <i>Mmd2</i>        | 3.21  | 2    | 3.07 | 2.33 |
| ENSMUSG00000039536 | <i>Stau1</i>       | 5.53  | 5.25 | 5.24 | 5.17 |
| ENSMUSG00000039552 | <i>NA</i>          | 1.92  | 1.47 | 1.12 | 0.13 |
| ENSMUSG00000039568 | <i>NA</i>          | 3.71  | 4.49 | 4.27 | 4.28 |
| ENSMUSG00000039599 | <i>AA536717</i>    | 2.78  | 2.91 | 2.87 | 2.65 |
| ENSMUSG00000039601 | <i>Rcan2</i>       | 3.83  | 2.23 | 3.33 | 1.52 |
| ENSMUSG00000039615 | <i>Stub1</i>       | 5.55  | 6.31 | 5.62 | 5.73 |
| ENSMUSG00000039616 | <i>Mocos</i>       | 4.88  | 4.67 | 4.66 | 4.24 |
| ENSMUSG00000039617 | <i>NA</i>          | 1.69  | 1.23 | 1.18 | 1.67 |
| ENSMUSG00000039623 | <i>C330006K01R</i> | 1.15  | 1.89 | 2.34 | 2.01 |
| ENSMUSG00000039628 | <i>Hs3st6</i>      | -0.89 | 1.69 | 1.21 | 1.03 |
| ENSMUSG00000039630 | <i>Hnrnpu</i>      | 6.21  | 5.55 | 5.72 | 5.33 |
| ENSMUSG00000039634 | <i>Zfp189</i>      | 2.21  | 1.33 | 1.55 | 1.65 |
| ENSMUSG00000039637 | <i>Coro7</i>       | 2.63  | 3.06 | 2.74 | 2.36 |
| ENSMUSG00000039640 | <i>Mrpl12</i>      | 6     | 6.28 | 6.52 | 6.67 |
| ENSMUSG00000039646 | <i>Vasn</i>        | 1.74  | 3.43 | 2.48 | 2.88 |
| ENSMUSG00000039648 | <i>Ceb1l</i>       | 5.16  | 6.05 | 4.88 | 5.12 |
| ENSMUSG00000039652 | <i>Cpeb3</i>       | 1.77  | 0.83 | 1.93 | 1.49 |
| ENSMUSG00000039653 | <i>Baat</i>        | 7.55  | 7.03 | 7.04 | 6.86 |
| ENSMUSG00000039656 | <i>Rxrb</i>        | 3.73  | 4.21 | 4.03 | 4.02 |
| ENSMUSG00000039660 | <i>D2Wsu81e</i>    | 3.39  | 4.16 | 3.79 | 3.69 |
| ENSMUSG00000039662 | <i>Icmt</i>        | 3.27  | 3.59 | 3.32 | 3.38 |
| ENSMUSG00000039670 | <i>I810049H13R</i> | 2.87  | 3.32 | 3.91 | 3.31 |
| ENSMUSG00000039671 | <i>Prkcbp1</i>     | 1.65  | 1.73 | 1.77 | 1.5  |
| ENSMUSG00000039678 | <i>Tbc1d13</i>     | 3.76  | 4.01 | 3.81 | 3.68 |
| ENSMUSG00000039680 | <i>Mrps6</i>       | 4.19  | 3.91 | 4.06 | 3.62 |
| ENSMUSG00000039682 | <i>Lap3</i>        | 7.46  | 7.49 | 7.44 | 7.25 |
| ENSMUSG00000039686 | <i>Zer1</i>        | 2.77  | 3.39 | 3.22 | 3.13 |
| ENSMUSG00000039701 | <i>Usp53</i>       | 1.67  | 0.95 | 1.39 | 1.26 |
| ENSMUSG00000039703 | <i>Nploc4</i>      | 5.34  | 5.63 | 5.31 | 5.22 |
| ENSMUSG00000039704 | <i>Lmbrd2</i>      | 4.08  | 2.89 | 3.5  | 3.11 |

|                    |                    |      |      |      |      |
|--------------------|--------------------|------|------|------|------|
| ENSMUSG00000039706 | <i>Ldb2</i>        | 1.35 | 1.44 | 1.08 | 1.37 |
| ENSMUSG00000039713 | <i>mKIAA0720</i>   | 0.65 | 1.83 | 1.63 | 1.44 |
| ENSMUSG00000039715 | <i>Wdr34</i>       | 1.41 | 2.59 | 2.04 | 1.84 |
| ENSMUSG00000039725 | <i>2810408M09R</i> | 1.49 | 2.28 | 2.48 | 2.01 |
| ENSMUSG00000039735 | <i>Fnbp11</i>      | 2.36 | 2.03 | 2.02 | 1.47 |
| ENSMUSG00000039737 | <i>Prkrip1</i>     | 2.12 | 2.01 | 2.42 | 2.09 |
| ENSMUSG00000039740 | <i>Alg2</i>        | 2.7  | 3.64 | 2.59 | 2.96 |
| ENSMUSG00000039745 | <i>Htati2</i>      | 4.73 | 4.94 | 4.77 | 4.74 |
| ENSMUSG00000039752 | <i>NA</i>          | 1.86 | 3.28 | 2.75 | 2.55 |
| ENSMUSG00000039753 | <i>Fbxl5</i>       | 4.13 | 3.76 | 3.97 | 3.58 |
| ENSMUSG00000039754 | <i>Alkbh4</i>      | 1.45 | 1.57 | 1.31 | 1.91 |
| ENSMUSG00000039756 | <i>Dnttip2</i>     | 4.17 | 3.57 | 3.78 | 3.5  |
| ENSMUSG00000039759 | <i>Thap3</i>       | 1.79 | 2.92 | 2.48 | 2.17 |
| ENSMUSG00000039763 | <i>ORF28</i>       | 2.71 | 2.44 | 3.01 | 2.47 |
| ENSMUSG00000039768 | <i>Dnajc11</i>     | 3.03 | 3.72 | 3.62 | 3.59 |
| ENSMUSG00000039770 | <i>Ypel5</i>       | 5.18 | 3.72 | 4.94 | 4.4  |
| ENSMUSG00000039771 | <i>Polr2j</i>      | 4.08 | 4.36 | 4.47 | 4.49 |
| ENSMUSG00000039782 | <i>cpeb2</i>       | 4.62 | 2.72 | 4.26 | 3.27 |
| ENSMUSG00000039783 | <i>Kmo</i>         | 7.19 | 6.65 | 6.91 | 6.48 |
| ENSMUSG00000039789 | <i>Zfp597</i>      | 1.73 | 0.58 | 1.31 | 0.82 |
| ENSMUSG00000039795 | <i>Zfand1</i>      | 1.13 | 1.01 | 1.33 | 1.36 |
| ENSMUSG00000039804 | <i>Ncoa5</i>       | 2.71 | 3    | 2.36 | 2.34 |
| ENSMUSG00000039809 | <i>Gabbr2</i>      | 2.9  | 3.36 | 2.4  | 2.76 |
| ENSMUSG00000039810 | <i>Zc3h10</i>      | 2.12 | 2.77 | 2.44 | 2.43 |
| ENSMUSG00000039826 | <i>Trub2</i>       | 2.47 | 2.92 | 2.62 | 2.8  |
| ENSMUSG00000039828 | <i>Wdr70</i>       | 1.05 | 0.74 | 0.95 | 0.88 |
| ENSMUSG00000039831 | <i>Arhgap29</i>    | 4.85 | 3.54 | 3.94 | 3.67 |
| ENSMUSG00000039834 | <i>Zfp335</i>      | 2.33 | 2.97 | 2.47 | 2.43 |
| ENSMUSG00000039840 | <i>NA</i>          | 2.73 | 2.56 | 2.76 | 2.26 |
| ENSMUSG00000039841 | <i>Zfp800</i>      | 2.09 | 0.8  | 1.64 | 1.2  |
| ENSMUSG00000039844 | <i>Rapgef1</i>     | 3.8  | 4.42 | 4.02 | 3.96 |

|                    |                     |      |      |      |      |
|--------------------|---------------------|------|------|------|------|
| ENSMUSG00000039849 | <i>F730014I05Ri</i> | 3.01 | 3.61 | 3.37 | 3.05 |
| ENSMUSG00000039852 | <i>Rere</i>         | 2.6  | 2.62 | 2.91 | 2.77 |
| ENSMUSG00000039853 | <i>Trim14</i>       | 3.84 | 4.22 | 3.71 | 3.45 |
| ENSMUSG00000039865 | <i>Slc44a3</i>      | 2.24 | 2.04 | 1.95 | 1.43 |
| ENSMUSG00000039878 | <i>Slc39a5</i>      | 0.97 | 0.18 | 1.36 | 0.41 |
| ENSMUSG00000039879 | <i>Heca</i>         | 4.23 | 3.56 | 3.98 | 3.44 |
| ENSMUSG00000039886 | <i>Tmem120a</i>     | 5.62 | 5.4  | 5.96 | 5.37 |
| ENSMUSG00000039887 | <i>Alg14</i>        | 4.44 | 4.03 | 4.1  | 3.55 |
| ENSMUSG00000039901 | <i>9130011E15Ri</i> | 2.15 | 2.11 | 2.49 | 2.03 |
| ENSMUSG00000039908 | <i>Slc26a11</i>     | 1.41 | 1.66 | 2    | 1.61 |
| ENSMUSG00000039910 | <i>Cited2</i>       | 3.65 | 4.22 | 3.85 | 3.41 |
| ENSMUSG00000039914 | <i>Coq10a</i>       | 3.34 | 3.44 | 3.7  | 3.49 |
| ENSMUSG00000039917 | <i>Rhbdd2</i>       | 3.33 | 3.74 | 3.45 | 3.2  |
| ENSMUSG00000039934 | <i>A530088I07Ri</i> | 2.93 | 2.71 | 2.8  | 2.62 |
| ENSMUSG00000039952 | <i>Dagl</i>         | 5.22 | 5.17 | 5.03 | 4.9  |
| ENSMUSG00000039953 | <i>Clstn1</i>       | 1.04 | 1.46 | 0.71 | 0.85 |
| ENSMUSG00000039956 | <i>Mrap</i>         | 5.28 | 6.13 | 5.84 | 5.92 |
| ENSMUSG00000039958 | <i>4833442J19Ri</i> | 3.61 | 3.76 | 4.15 | 3.75 |
| ENSMUSG00000039959 | <i>Hipl</i>         | 1.43 | 1.19 | 0.5  | 0.5  |
| ENSMUSG00000039960 | <i>Rhou</i>         | 5.39 | 5.09 | 5.15 | 4.86 |
| ENSMUSG00000039967 | <i>NA</i>           | 2.34 | 0.87 | 1.44 | 0.36 |
| ENSMUSG00000039968 | <i>Rsbn11</i>       | 1.96 | 1.16 | 1.66 | 0.94 |
| ENSMUSG00000039976 | <i>Tbc1d16</i>      | 1.48 | 1.63 | 1.62 | 1.71 |
| ENSMUSG00000039982 | <i>Dtx4</i>         | 3.32 | 3.03 | 2.41 | 1.95 |
| ENSMUSG00000039983 | <i>Ccdc32</i>       | 2.05 | 2.54 | 2.34 | 2.27 |
| ENSMUSG00000039987 | <i>Phf2</i>         | 0.93 | 0.94 | 1.07 | 0.91 |
| ENSMUSG00000039988 | <i>Ankrd13c</i>     | 4.05 | 3.32 | 4.13 | 3.59 |
| ENSMUSG00000039989 | <i>Cbx4</i>         | 2.61 | 3.66 | 3.13 | 2.35 |
| ENSMUSG00000039990 | <i>2700050L05Ri</i> | 2.78 | 2.45 | 2.46 | 2.57 |
| ENSMUSG00000039997 | <i>Ifi203</i>       | 1.82 | 0.7  | 1    | 0.75 |
| ENSMUSG00000040006 | <i>BC013529</i>     | 5.18 | 4.44 | 4.78 | 4.32 |

|                    |                |      |      |      |      |
|--------------------|----------------|------|------|------|------|
| ENSMUSG00000040007 | <i>Bahd1</i>   | 1.98 | 2.81 | 2.29 | 2.15 |
| ENSMUSG00000040010 | <i>Slc7a5</i>  | 0.58 | 1.49 | 1.21 | 0.96 |
| ENSMUSG00000040017 | <i>Saa4</i>    | 8.82 | 8.63 | 9.17 | 8.65 |
| ENSMUSG00000040018 | <i>Cox15</i>   | 4.11 | 4.06 | 4.02 | 3.76 |
| ENSMUSG00000040021 | <i>NA</i>      | 3.39 | 2.65 | 3.17 | 3    |
| ENSMUSG00000040025 | <i>Ythdf2</i>  | 3.71 | 3.28 | 3.25 | 3.09 |
| ENSMUSG00000040026 | <i>Saa3</i>    | 1.46 | 2.17 | 1.7  | 1.86 |
| ENSMUSG00000040028 | <i>Elavl1</i>  | 4.78 | 3.96 | 4.41 | 4.27 |
| ENSMUSG00000040029 | <i>Ipo8</i>    | 4.38 | 3.98 | 4.13 | 3.74 |
| ENSMUSG00000040033 | <i>Stat2</i>   | 4.03 | 4.28 | 3.83 | 4.14 |
| ENSMUSG00000040034 | <i>Nup43</i>   | 1.57 | 1.43 | 1.47 | 0.96 |
| ENSMUSG00000040040 | <i>Ift88</i>   | 1.07 | 0.84 | 1.15 | 0.67 |
| ENSMUSG00000040043 | <i>Rbms2</i>   | 2.4  | 2.09 | 2.31 | 2.22 |
| ENSMUSG00000040044 | <i>Orc3l</i>   | 3.74 | 3.3  | 3.58 | 3.07 |
| ENSMUSG00000040048 | <i>Ndufb10</i> | 7.1  | 7.29 | 7.91 | 8.2  |
| ENSMUSG00000040054 | <i>TIP5</i>    | 2.83 | 2.86 | 2.74 | 2.59 |
| ENSMUSG00000040078 | <i>NA</i>      | 4.27 | 2.66 | 3.02 | 3.76 |
| ENSMUSG00000040097 | <i>Flywch1</i> | 3.16 | 3.58 | 3.1  | 3.15 |
| ENSMUSG00000040102 | <i>Klhdc5</i>  | 1.5  | 1.24 | 1.59 | 0.79 |
| ENSMUSG00000040105 | <i>Ppapdc2</i> | 3.24 | 3.14 | 3.46 | 2.68 |
| ENSMUSG00000040112 | <i>Mrps35</i>  | 4.72 | 4.79 | 4.68 | 4.54 |
| ENSMUSG00000040123 | <i>Zmym5</i>   | 3.61 | 2.08 | 3.16 | 2.69 |
| ENSMUSG00000040127 | <i>Sdro</i>    | 5.83 | 4.92 | 5.47 | 4.79 |
| ENSMUSG00000040128 | <i>Pnrc1</i>   | 6.02 | 6.17 | 5.9  | 5.32 |
| ENSMUSG00000040134 | <i>Rdh7</i>    | 9.47 | 9.53 | 9.5  | 9.31 |
| ENSMUSG00000040146 | <i>Rgl3</i>    | 3.04 | 3.63 | 3.8  | 3.47 |
| ENSMUSG00000040147 | <i>Maob</i>    | 7.95 | 7.28 | 7.68 | 7.09 |
| ENSMUSG00000040151 | <i>Hs2st1</i>  | 2.4  | 1.84 | 1.97 | 1.79 |
| ENSMUSG00000040167 | <i>Ikzf5</i>   | 1.66 | 0.43 | 1.13 | 0.83 |
| ENSMUSG00000040170 | <i>Fmo2</i>    | 3.92 | 3.85 | 3.61 | 3.87 |
| ENSMUSG00000040174 | <i>Alkbh3</i>  | 3.3  | 3.37 | 3.69 | 3.16 |

|                    |                     |      |      |      |      |
|--------------------|---------------------|------|------|------|------|
| ENSMUSG00000040177 | <i>2310057M21R</i>  | 0.8  | 1.22 | 1.02 | 1.15 |
| ENSMUSG00000040181 | <i>Fmo1</i>         | 7.86 | 7.27 | 7.5  | 7.16 |
| ENSMUSG00000040188 | <i>Scamp2</i>       | 3.83 | 4.1  | 3.89 | 3.62 |
| ENSMUSG00000040212 | <i>Emp3</i>         | 1.72 | 2.01 | 1.43 | 1.73 |
| ENSMUSG00000040213 | <i>Ccbl2</i>        | 7.29 | 7.2  | 6.51 | 6.53 |
| ENSMUSG00000040225 | <i>Bat2d</i>        | 2.89 | 2.59 | 2.89 | 2.49 |
| ENSMUSG00000040234 | <i>Tm7sf3</i>       | 4.63 | 4.93 | 4.71 | 4.61 |
| ENSMUSG00000040236 | <i>Trappc5</i>      | 4.15 | 4.79 | 4.98 | 4.98 |
| ENSMUSG00000040242 | <i>Fgfr1op2</i>     | 4.28 | 3.53 | 3.91 | 3.59 |
| ENSMUSG00000040249 | <i>Lrp1</i>         | 5.73 | 6.46 | 5.99 | 5.77 |
| ENSMUSG00000040250 | <i>4933424B01Ri</i> | 2.83 | 2.93 | 3    | 2.89 |
| ENSMUSG00000040253 | <i>Gbp6</i>         | 3.06 | 2.03 | 1.13 | 1.58 |
| ENSMUSG00000040263 | <i>Klhdc4</i>       | 1.7  | 2.22 | 1.86 | 1.64 |
| ENSMUSG00000040268 | <i>Plekha1</i>      | 1.94 | 1.65 | 1.79 | 1.42 |
| ENSMUSG00000040269 | <i>Mrps28</i>       | 4.4  | 4.33 | 4.29 | 4.04 |
| ENSMUSG00000040274 | <i>Cdk6</i>         | 1.18 | 0.8  | 1.24 | 0.93 |
| ENSMUSG00000040280 | <i>Ndufa4l2</i>     | 0.03 | 0.19 | 1.57 | 1.34 |
| ENSMUSG00000040282 | <i>BC052040</i>     | 1.23 | 0.65 | 1.11 | 0.56 |
| ENSMUSG00000040296 | <i>Ddx58</i>        | 3.62 | 3.28 | 3.29 | 3.43 |
| ENSMUSG00000040297 | <i>NA</i>           | 2.61 | 1.44 | 2.12 | 1.13 |
| ENSMUSG00000040302 | <i>C030048B08Ri</i> | 2.19 | 1.36 | 1.9  | 1.77 |
| ENSMUSG00000040321 | <i>Zfp770</i>       | 2.11 | 1.08 | 1.71 | 1.3  |
| ENSMUSG00000040323 | <i>NA</i>           | 1.43 | 0.99 | 1.47 | 1.9  |
| ENSMUSG00000040325 | <i>Vprbp</i>        | 3.24 | 3.24 | 3.23 | 3.01 |
| ENSMUSG00000040331 | <i>NA</i>           | 4.89 | 4.12 | 4.75 | 4.14 |
| ENSMUSG00000040350 | <i>Trim7</i>        | 0.69 | 0.59 | 1.03 | 0.63 |
| ENSMUSG00000040351 | <i>mKIAA1386</i>    | 3.13 | 2.58 | 2.79 | 2.46 |
| ENSMUSG00000040354 | <i>Mars</i>         | 4.49 | 5.2  | 4.57 | 4.7  |
| ENSMUSG00000040356 | <i>Skiv2l</i>       | 3.93 | 4.66 | 4.31 | 4.09 |
| ENSMUSG00000040359 | <i>mKIAA0776</i>    | 3.53 | 3.38 | 2.91 | 2.78 |
| ENSMUSG00000040363 | <i>Bcor</i>         | 1.66 | 2.71 | 1.74 | 1.35 |

|                    |                     |      |      |      |      |
|--------------------|---------------------|------|------|------|------|
| ENSMUSG00000040365 | <i>Trim41</i>       | 3.08 | 3.42 | 3.19 | 2.76 |
| ENSMUSG00000040370 | <i>Lyrm5</i>        | 5.45 | 3.93 | 5.06 | 3.98 |
| ENSMUSG00000040374 | <i>Pxmp3</i>        | 5.23 | 4.42 | 4.94 | 4.44 |
| ENSMUSG00000040383 | <i>Aqr</i>          | 2.79 | 2.82 | 2.91 | 2.74 |
| ENSMUSG00000040385 | <i>Ppp1ca</i>       | 7.26 | 7.33 | 7.18 | 6.85 |
| ENSMUSG00000040390 | <i>Map3k10</i>      | 1.56 | 2.28 | 1.9  | 1.96 |
| ENSMUSG00000040396 | <i>Abhd13</i>       | 3.17 | 2.61 | 2.62 | 2.38 |
| ENSMUSG00000040407 | <i>Akap9</i>        | 2.42 | 1.92 | 2.2  | 1.9  |
| ENSMUSG00000040410 | <i>Fbxl4</i>        | 3.5  | 3.49 | 3.48 | 3.23 |
| ENSMUSG00000040413 | <i>Timd2</i>        | 5.87 | 5.39 | 5.88 | 5.62 |
| ENSMUSG00000040414 | <i>Slc25a28</i>     | 3.33 | 3.74 | 3.79 | 3.68 |
| ENSMUSG00000040423 | <i>Rc3h1</i>        | 2.23 | 1.81 | 2.25 | 1.79 |
| ENSMUSG00000040430 | <i>Pitpnc1</i>      | 2.72 | 2.24 | 3.25 | 2.9  |
| ENSMUSG00000040433 | <i>Zbtb38</i>       | 2.22 | 1.91 | 1.82 | 1.83 |
| ENSMUSG00000040435 | <i>Myd116</i>       | 2.65 | 2.81 | 2.69 | 2.76 |
| ENSMUSG00000040441 | NA                  | 4.2  | 4.92 | 4.58 | 4.55 |
| ENSMUSG00000040446 | <i>BC021395</i>     | 1.88 | 1.12 | 1.59 | 1.29 |
| ENSMUSG00000040447 | NA                  | 3.86 | 4.06 | 4.51 | 3.79 |
| ENSMUSG00000040451 | <i>Sgms1</i>        | 2.69 | 2.25 | 2.38 | 2.05 |
| ENSMUSG00000040455 | <i>Usp45</i>        | 2.54 | 1.45 | 2.25 | 1.88 |
| ENSMUSG00000040459 | <i>9430010O03R1</i> | 4.65 | 3.55 | 3.94 | 3.9  |
| ENSMUSG00000040462 | <i>Os9</i>          | 6.76 | 7.44 | 7.05 | 6.94 |
| ENSMUSG00000040463 | <i>Mybbp1a</i>      | 3.72 | 4.69 | 4.21 | 4.08 |
| ENSMUSG00000040464 | <i>Gtpbp10</i>      | 2.27 | 1.04 | 2.01 | 1.45 |
| ENSMUSG00000040466 | <i>Blvrb</i>        | 6.2  | 7.01 | 6.36 | 6.5  |
| ENSMUSG00000040471 | <i>Ggt6</i>         | 3.45 | 4.09 | 4.09 | 3.54 |
| ENSMUSG00000040472 | <i>Rabggta</i>      | 3.63 | 3.91 | 4.04 | 3.95 |
| ENSMUSG00000040479 | <i>Dgkz</i>         | 3.15 | 3.86 | 3.6  | 3.3  |
| ENSMUSG00000040481 | <i>Bptf</i>         | 2.36 | 2.05 | 2.25 | 2.09 |
| ENSMUSG00000040482 | <i>Dom3z</i>        | 3.05 | 4.12 | 3.51 | 3.67 |
| ENSMUSG00000040488 | <i>Ltbp4</i>        | 2.74 | 3.72 | 3.13 | 3.29 |

|                    |                     |       |       |       |       |
|--------------------|---------------------|-------|-------|-------|-------|
| ENSMUSG00000040498 | <i>2210010C17R1</i> | 1.67  | 3.21  | 2.97  | 3.13  |
| ENSMUSG00000040505 | <i>Abcg5</i>        | 4.89  | 4.93  | 4.95  | 5.16  |
| ENSMUSG00000040506 | <i>D030051N19R</i>  | 3.13  | 3.45  | 3.14  | 3     |
| ENSMUSG00000040511 | <i>Pvr</i>          | 1.55  | 1.26  | 1.55  | 1.23  |
| ENSMUSG00000040520 | <i>Manea</i>        | 3.59  | 2.05  | 3.13  | 2.56  |
| ENSMUSG00000040521 | <i>Tsfn</i>         | 2.83  | 3.2   | 2.81  | 2.68  |
| ENSMUSG00000040524 | <i>Zfp609</i>       | 1.5   | 1.75  | 1.54  | 1.76  |
| ENSMUSG00000040525 | <i>Cblc</i>         | 3.24  | 4.17  | 3.68  | 3.42  |
| ENSMUSG00000040532 | <i>Abhd11</i>       | 4.73  | 4.65  | 4.73  | 4.41  |
| ENSMUSG00000040536 | <i>Efcbp1</i>       | 3.78  | 2.91  | 3.45  | 3.11  |
| ENSMUSG00000040548 | <i>Tex2</i>         | 5.87  | 5.66  | 5.74  | 5.59  |
| ENSMUSG00000040549 | <i>mKIAA0097</i>    | 2.02  | 1.49  | 1.91  | 1.43  |
| ENSMUSG00000040550 | <i>Otud6b</i>       | 3.44  | 2.92  | 3.26  | 2.85  |
| ENSMUSG00000040557 | <i>Wbscr27</i>      | 2.42  | 2.91  | 2.23  | 2.34  |
| ENSMUSG00000040560 | <i>NA</i>           | 2.54  | 2.24  | 2.75  | 2.42  |
| ENSMUSG00000040562 | <i>Gstm2</i>        | 5.62  | 4.6   | 5.79  | 5.02  |
| ENSMUSG00000040564 | <i>Apoc1</i>        | 11.88 | 11.23 | 12.26 | 11.95 |
| ENSMUSG00000040565 | <i>Btafl</i>        | 2.71  | 1.99  | 2.42  | 1.9   |
| ENSMUSG00000040583 | <i>Cyp2b13</i>      | 6.85  | -5.23 | 4.18  | -5.23 |
| ENSMUSG00000040584 | <i>Abcb1a</i>       | 0.87  | 0.28  | 1.01  | 0.09  |
| ENSMUSG00000040592 | <i>Cd79b</i>        | -0.74 | -0.66 | 2.4   | -0.94 |
| ENSMUSG00000040599 | <i>Mis12</i>        | 3.43  | 2.78  | 3.01  | 2.93  |
| ENSMUSG00000040605 | <i>Bace2</i>        | 2.16  | 2.56  | 2.01  | 1.59  |
| ENSMUSG00000040612 | <i>NA</i>           | 4.23  | 4.64  | 4.07  | 4.09  |
| ENSMUSG00000040613 | <i>Apobec1</i>      | 3.53  | 3.15  | 3.4   | 2.88  |
| ENSMUSG00000040616 | <i>Tmem51</i>       | 3.38  | 4.33  | 3.58  | 3.74  |
| ENSMUSG00000040620 | <i>Dhx33</i>        | 2.86  | 3.13  | 2.78  | 2.59  |
| ENSMUSG00000040648 | <i>mKIAA0433</i>    | 5.18  | 4.07  | 4.53  | 3.77  |
| ENSMUSG00000040651 | <i>NA</i>           | 2.5   | 1.77  | 2.44  | 1.87  |
| ENSMUSG00000040652 | <i>Oaz2</i>         | 2     | 2.27  | 2.54  | 2.03  |
| ENSMUSG00000040658 | <i>BC048355</i>     | 3.29  | 3.97  | 3.91  | 3.44  |

|                    |                     |        |       |      |       |
|--------------------|---------------------|--------|-------|------|-------|
| ENSMUSG00000040659 | <i>Efhd2</i>        | 4.82   | 5.81  | 4.92 | 5.32  |
| ENSMUSG00000040660 | <i>Cyp2b9</i>       | 7.96   | -3.23 | 5.65 | -3.65 |
| ENSMUSG00000040661 | <i>Rad54l2</i>      | 3.22   | 2.81  | 3.11 | 2.76  |
| ENSMUSG00000040667 | <i>Nup88</i>        | 3.79   | 3.49  | 3.82 | 3.35  |
| ENSMUSG00000040681 | <i>Hmgn1</i>        | 5.04   | 3.82  | 4.34 | 3.42  |
| ENSMUSG00000040687 | <i>Madd</i>         | 1.72   | 2.23  | 2.36 | 2.04  |
| ENSMUSG00000040688 | <i>Tbl3</i>         | 3.2    | 3.98  | 3.68 | 3.54  |
| ENSMUSG00000040697 | <i>Dnajc16</i>      | 2.46   | 2.64  | 2.36 | 2.26  |
| ENSMUSG00000040699 | <i>Limd2</i>        | 3.74   | 3.63  | 3.63 | 3.06  |
| ENSMUSG00000040701 | <i>Aplg2</i>        | 1.51   | 2.26  | 2.13 | 1.88  |
| ENSMUSG00000040705 | <i>NA</i>           | #NAME? | -4.89 | 1.75 | 1.95  |
| ENSMUSG00000040706 | <i>Agmat</i>        | 6.94   | 7.5   | 7.28 | 6.99  |
| ENSMUSG00000040712 | <i>Camta2</i>       | 2.69   | 3.47  | 3.25 | 3.19  |
| ENSMUSG00000040713 | <i>Cregl</i>        | 8.51   | 8.04  | 8.3  | 8.02  |
| ENSMUSG00000040715 | <i>Ddi2</i>         | 6.66   | 7.04  | 6.55 | 6.41  |
| ENSMUSG00000040720 | <i>1110037F02Ri</i> | 2.39   | 2.21  | 2.34 | 2.05  |
| ENSMUSG00000040721 | <i>Zfx2</i>         | 0.62   | 1.45  | 1.26 | 1.57  |
| ENSMUSG00000040722 | <i>Scamp5</i>       | 2.47   | 2.61  | 2.43 | 2.23  |
| ENSMUSG00000040723 | <i>Rcsd1</i>        | 2.17   | 2.49  | 1.98 | 1.4   |
| ENSMUSG00000040725 | <i>Hnrp11</i>       | 4.69   | 5.07  | 5.05 | 4.76  |
| ENSMUSG00000040731 | <i>Eif4h</i>        | 6.41   | 6.77  | 6.39 | 6.3   |
| ENSMUSG00000040732 | <i>Erg</i>          | 1.45   | 1.29  | 1.25 | 1.02  |
| ENSMUSG00000040738 | <i>Ints8</i>        | 2.84   | 2.15  | 2.44 | 2.12  |
| ENSMUSG00000040740 | <i>Slc25a34</i>     | 2.13   | 1.92  | 1.98 | 1.36  |
| ENSMUSG00000040746 | <i>Rnf167</i>       | 5.3    | 5.77  | 5.85 | 5.51  |
| ENSMUSG00000040747 | <i>Cd53</i>         | 3.53   | 1.85  | 2.88 | 1.81  |
| ENSMUSG00000040760 | <i>Appl1</i>        | 1.69   | 0.75  | 1.64 | 0.61  |
| ENSMUSG00000040761 | <i>Spn</i>          | 2.07   | 2.62  | 2.4  | 2.28  |
| ENSMUSG00000040767 | <i>3300001G02Ri</i> | 1.33   | 1.52  | 2.15 | 1.69  |
| ENSMUSG00000040771 | <i>AI314976</i>     | 3.75   | 3.71  | 3.91 | 3.54  |
| ENSMUSG00000040774 | <i>Cept1</i>        | 5.62   | 5.14  | 5.12 | 4.55  |



|                    |                     |      |      |      |      |
|--------------------|---------------------|------|------|------|------|
| ENSMUSG00000040782 | <i>Rfwd2</i>        | 1.67 | 0.96 | 1.51 | 0.88 |
| ENSMUSG00000040785 | <i>mKIAA4119</i>    | 2.58 | 1.36 | 2.07 | 1.61 |
| ENSMUSG00000040795 | <i>Iqcc</i>         | 2.44 | 2.12 | 1.78 | 1.65 |
| ENSMUSG00000040811 | <i>NA</i>           | 1.11 | 1.85 | 1.16 | 0.85 |
| ENSMUSG00000040813 | <i>Tex264</i>       | 6.08 | 6.7  | 6.45 | 6.28 |
| ENSMUSG00000040818 | <i>A630054L15Ri</i> | 3.16 | 2.19 | 2.66 | 2.5  |
| ENSMUSG00000040820 | <i>Hlcs</i>         | 2.13 | 1.81 | 2.18 | 1.99 |
| ENSMUSG00000040822 | <i>1700123O20Ri</i> | 4.55 | 4.84 | 4.79 | 4.66 |
| ENSMUSG00000040824 | <i>Snrpd2</i>       | 4.36 | 4.26 | 4.1  | 4.54 |
| ENSMUSG00000040842 | <i>D4Ert22e</i>     | 4.73 | 5.18 | 5.07 | 4.93 |
| ENSMUSG00000040843 | <i>Tiprl</i>        | 4.12 | 3.21 | 3.76 | 3.52 |
| ENSMUSG00000040848 | <i>Sft2d2</i>       | 5    | 4.76 | 4.68 | 4.45 |
| ENSMUSG00000040850 | <i>Psme4</i>        | 5.28 | 4.62 | 4.65 | 4.23 |
| ENSMUSG00000040855 | <i>Reps2</i>        | 3.64 | 2.82 | 3.5  | 2.86 |
| ENSMUSG00000040857 | <i>Erf</i>          | 2.74 | 3.31 | 3.49 | 3.07 |
| ENSMUSG00000040859 | <i>Bsdcl</i>        | 5.25 | 5.66 | 5.45 | 5.13 |
| ENSMUSG00000040865 | <i>A430093A21Ri</i> | 1.22 | 0.37 | 0.99 | 0.9  |
| ENSMUSG00000040883 | <i>BC010787</i>     | 8.64 | 8.95 | 9.08 | 9.05 |
| ENSMUSG00000040888 | <i>Gfer</i>         | 4.06 | 4.38 | 4.23 | 4.12 |
| ENSMUSG00000040891 | <i>Foxa3</i>        | 4.17 | 4.91 | 4.55 | 5.04 |
| ENSMUSG00000040904 | <i>D11Bwg0434e</i>  | 6.14 | 6.9  | 7.01 | 6.9  |
| ENSMUSG00000040913 | <i>Fbxw4</i>        | 2.88 | 3.46 | 3.04 | 2.73 |
| ENSMUSG00000040918 | <i>Slc19a2</i>      | 6.01 | 5.67 | 5.84 | 5.44 |
| ENSMUSG00000040928 | <i>S100pbp</i>      | 2.65 | 2.12 | 2.1  | 1.61 |
| ENSMUSG00000040938 | <i>Slc16a11</i>     | 1.49 | 2.52 | 2.02 | 2.38 |
| ENSMUSG00000040940 | <i>mFLJ00369</i>    | 3.23 | 4.32 | 3.79 | 3.58 |
| ENSMUSG00000040943 | <i>E130014J05Ri</i> | 1.23 | 0.75 | 0.99 | 0.26 |
| ENSMUSG00000040945 | <i>Rcc2</i>         | 2.69 | 3.27 | 3.26 | 3    |
| ENSMUSG00000040952 | <i>Rps19</i>        | 1.32 | 0.9  | 1.43 | 1.73 |
| ENSMUSG00000040957 | <i>Cables1</i>      | 0.59 | 1.14 | 1.9  | 1.25 |
| ENSMUSG00000040963 | <i>Asgr2</i>        | 7.99 | 7.87 | 8.19 | 7.95 |

|                    |                     |      |       |      |      |
|--------------------|---------------------|------|-------|------|------|
| ENSMUSG00000040964 | <i>mKIAA1626</i>    | 1.93 | 3     | 2.21 | 2.04 |
| ENSMUSG00000040997 | <i>Abhd4</i>        | 5.04 | 5.35  | 5.02 | 4.87 |
| ENSMUSG00000041003 | <i>Nbeal1</i>       | 1.03 | -0.61 | 0.42 | 0.19 |
| ENSMUSG00000041012 | <i>Cmtm8</i>        | 5.27 | 5.24  | 5.96 | 5.68 |
| ENSMUSG00000041025 | <i>C79267</i>       | 2.29 | 3.16  | 2.56 | 2.63 |
| ENSMUSG00000041028 | <i>Ghitm</i>        | 7.83 | 7.26  | 7.52 | 7.06 |
| ENSMUSG00000041035 | <i>5330431N19Ri</i> | 3.03 | 3.39  | 3.33 | 3.2  |
| ENSMUSG00000041037 | <i>Irgq</i>         | 2.62 | 3.2   | 2.66 | 2.67 |
| ENSMUSG00000041040 | <i>Als2cr13</i>     | 2.3  | 1.43  | 1.74 | 1.12 |
| ENSMUSG00000041044 | <i>Lrit1</i>        | 1.16 | -1.91 | 1.52 | 1.29 |
| ENSMUSG00000041057 | <i>NA</i>           | 3.55 | 3.48  | 3.11 | 3.21 |
| ENSMUSG00000041058 | <i>Wwp1</i>         | 4.92 | 4.09  | 4.36 | 4    |
| ENSMUSG00000041075 | <i>Fzd7</i>         | 2.87 | 2.74  | 2.36 | 1.97 |
| ENSMUSG00000041079 | <i>Rwdd2b</i>       | 2.61 | 2.59  | 2.74 | 2.46 |
| ENSMUSG00000041084 | <i>2310008M10R</i>  | 6.04 | 5.77  | 5.22 | 5.52 |
| ENSMUSG00000041096 | <i>Tspyl2</i>       | 1.25 | 0.99  | 0.67 | 0.3  |
| ENSMUSG00000041115 | <i>Iqsec2</i>       | 1.4  | 1.49  | 1.75 | 1.57 |
| ENSMUSG00000041119 | <i>Pde9a</i>        | 3.49 | 3.37  | 4.03 | 3.54 |
| ENSMUSG00000041124 | <i>8430410K20Ri</i> | 4.01 | 3.24  | 3.47 | 3    |
| ENSMUSG00000041126 | <i>NA</i>           | 3.87 | 3.89  | 4.06 | 3.76 |
| ENSMUSG00000041130 | <i>Zfp598</i>       | 4.31 | 5.1   | 4.62 | 4.62 |
| ENSMUSG00000041132 | <i>B230342M21R</i>  | 5.48 | 5.39  | 5.4  | 5.2  |
| ENSMUSG00000041133 | <i>SmcB</i>         | 4.37 | 4.08  | 4.2  | 3.93 |
| ENSMUSG00000041135 | <i>Ripk2</i>        | 2.14 | 1.51  | 2.41 | 2.14 |
| ENSMUSG00000041143 | <i>Tmco4</i>        | 2.13 | 2.77  | 2.6  | 2.41 |
| ENSMUSG00000041161 | <i>NA</i>           | 1.82 | 2.3   | 2.19 | 2.01 |
| ENSMUSG00000041164 | <i>Zmiz2</i>        | 3.22 | 4.33  | 3.9  | 3.79 |
| ENSMUSG00000041168 | <i>Lonpl</i>        | 6.01 | 6.47  | 6.2  | 5.9  |
| ENSMUSG00000041180 | <i>Hectd2</i>       | 5.97 | 4.48  | 4.86 | 4.46 |
| ENSMUSG00000041187 | <i>Prkd2</i>        | 1.21 | 1.57  | 1.04 | 1.01 |
| ENSMUSG00000041203 | <i>2310036O22Ri</i> | 6.01 | 6.22  | 5.99 | 5.95 |

|                    |                     |      |      |      |      |
|--------------------|---------------------|------|------|------|------|
| ENSMUSG00000041215 | <i>Yeats2</i>       | 1.15 | 1.29 | 1.07 | 0.76 |
| ENSMUSG00000041216 | <i>Rlbp111</i>      | 1.53 | 0.11 | 1.07 | 0.44 |
| ENSMUSG00000041220 | <i>Elovl6</i>       | 4.58 | 3.28 | 4.06 | 3.63 |
| ENSMUSG00000041225 | <i>Arhgap12</i>     | 3.03 | 2.06 | 2.84 | 2.28 |
| ENSMUSG00000041229 | <i>Phf8</i>         | 1.03 | 1.05 | 1.17 | 1.07 |
| ENSMUSG00000041231 | <i>Ublcp1</i>       | 1.74 | 1.51 | 2.07 | 1.63 |
| ENSMUSG00000041235 | <i>Chd7</i>         | 2.02 | 2    | 2.14 | 1.81 |
| ENSMUSG00000041236 | <i>Vps41</i>        | 4.71 | 4.1  | 4.3  | 3.79 |
| ENSMUSG00000041237 | <i>Pklr</i>         | 6.84 | 6.45 | 6.8  | 7    |
| ENSMUSG00000041238 | <i>Rbbp8</i>        | 1.8  | 1.4  | 1.7  | 1.06 |
| ENSMUSG00000041241 | <i>0610009K11Ri</i> | 3.65 | 4    | 4.1  | 3.75 |
| ENSMUSG00000041258 | <i>NA</i>           | 1.89 | 1.78 | 1.77 | 1.26 |
| ENSMUSG00000041261 | <i>Car8</i>         | 4.68 | 4.51 | 4.52 | 4.31 |
| ENSMUSG00000041263 | <i>Rusc1</i>        | 1.25 | 1.73 | 1.47 | 1.47 |
| ENSMUSG00000041264 | <i>Usp11</i>        | 3.58 | 3.64 | 3.34 | 3.49 |
| ENSMUSG00000041268 | <i>NA</i>           | 2.25 | 1.38 | 2.19 | 1.61 |
| ENSMUSG00000041272 | <i>Tox</i>          | 3.19 | 2.72 | 2.26 | 1.95 |
| ENSMUSG00000041278 | <i>Ttc1</i>         | 3.86 | 3.61 | 3.81 | 3.69 |
| ENSMUSG00000041297 | <i>Cdc215</i>       | 3.26 | 2.8  | 2.94 | 2.78 |
| ENSMUSG00000041303 | <i>Gtf3c3</i>       | 1.74 | 1.21 | 1.75 | 1.21 |
| ENSMUSG00000041308 | <i>Sntb2</i>        | 1.45 | 1.22 | 1.17 | 0.89 |
| ENSMUSG00000041319 | <i>Thoc6</i>        | 1.75 | 2.14 | 2.03 | 2.14 |
| ENSMUSG00000041324 | <i>Inhba</i>        | 1.31 | 0.71 | 0.91 | 1.66 |
| ENSMUSG00000041328 | <i>Pcf11</i>        | 2.68 | 1.76 | 2.58 | 2.04 |
| ENSMUSG00000041341 | <i>Atg2b</i>        | 2.89 | 2.7  | 2.98 | 2.56 |
| ENSMUSG00000041346 | <i>Wdr79</i>        | 2.29 | 2.96 | 2.51 | 2.28 |
| ENSMUSG00000041354 | <i>Rgl2</i>         | 1.84 | 2.42 | 2.22 | 1.88 |
| ENSMUSG00000041355 | <i>Ssr2</i>         | 6.59 | 6.33 | 6.03 | 6.09 |
| ENSMUSG00000041360 | <i>D19Bwg1357e</i>  | 3.29 | 3.55 | 3.31 | 3.2  |
| ENSMUSG00000041362 | <i>4930506M07R</i>  | 3.21 | 3.23 | 3.34 | 3.13 |
| ENSMUSG00000041375 | <i>Ccdc9</i>        | 1.84 | 2.77 | 2.44 | 2.23 |

|                    |                     |      |      |      |      |
|--------------------|---------------------|------|------|------|------|
| ENSMUSG00000041378 | <i>Cldn5</i>        | 1.7  | 2.91 | 1.45 | 2.05 |
| ENSMUSG00000041390 | <i>Mdfic</i>        | 3.19 | 2.27 | 2.59 | 1.86 |
| ENSMUSG00000041396 | <i>2810422O20Ra</i> | 1.73 | 1.65 | 1.72 | 1.33 |
| ENSMUSG00000041406 | <i>BC055324</i>     | 1.47 | 0.38 | 1.4  | 0.79 |
| ENSMUSG00000041408 | <i>Wapal</i>        | 4.93 | 4.3  | 4.37 | 3.77 |
| ENSMUSG00000041415 | <i>Dicer1</i>       | 3.02 | 2.81 | 3.01 | 2.57 |
| ENSMUSG00000041417 | <i>Pik3r1</i>       | 4.56 | 3.97 | 4.31 | 4.29 |
| ENSMUSG00000041426 | <i>Hibch</i>        | 6.09 | 5.18 | 5.82 | 5.17 |
| ENSMUSG00000041429 | <i>Nthl1</i>        | 1.33 | 2.48 | 2.44 | 2.52 |
| ENSMUSG00000041438 | <i>Cirh1a</i>       | 3.68 | 4    | 3.87 | 3.68 |
| ENSMUSG00000041439 | <i>2210010L05Ri</i> | 1.25 | 1.48 | 1.46 | 1.49 |
| ENSMUSG00000041444 | <i>Grit</i>         | 1.35 | 1.47 | 1.34 | 1.26 |
| ENSMUSG00000041445 | <i>Mmrn2</i>        | 2.43 | 2.87 | 2.53 | 2.71 |
| ENSMUSG00000041459 | <i>Tardbp</i>       | 5.15 | 4.58 | 4.87 | 4.5  |
| ENSMUSG00000041471 | <i>3110001K24Ri</i> | 5.08 | 3.84 | 4.49 | 4.21 |
| ENSMUSG00000041481 | <i>Serpina3g</i>    | 3.08 | 2.26 | 2.21 | 1.85 |
| ENSMUSG00000041483 | <i>Zfp281</i>       | 3.42 | 2.62 | 3.36 | 2.83 |
| ENSMUSG00000041488 | <i>Stx3</i>         | 2.15 | 1.58 | 1.65 | 1.15 |
| ENSMUSG00000041506 | <i>Rrp9</i>         | 1.93 | 3.22 | 2.82 | 2.91 |
| ENSMUSG00000041515 | <i>Irf8</i>         | 1.3  | 1.64 | 1.78 | 1.41 |
| ENSMUSG00000041528 | <i>Kpc1</i>         | 3.91 | 4.47 | 4.3  | 4.02 |
| ENSMUSG00000041530 | <i>Eif2c1</i>       | 3.06 | 2.86 | 2.68 | 2.46 |
| ENSMUSG00000041540 | <i>Sox5</i>         | 1.92 | 1.01 | 2.21 | 2.24 |
| ENSMUSG00000041548 | <i>Hspb8</i>        | 7.65 | 8.04 | 7.45 | 7.61 |
| ENSMUSG00000041560 | <i>Gltscr2</i>      | 4.56 | 5.24 | 4.76 | 4.9  |
| ENSMUSG00000041570 | <i>Camsap11l</i>    | 2.57 | 1.79 | 2.2  | 1.97 |
| ENSMUSG00000041571 | <i>Sepw1</i>        | 6.81 | 7.38 | 7.41 | 6.88 |
| ENSMUSG00000041577 | <i>Prelp</i>        | 4.86 | 5.32 | 5.02 | 5.07 |
| ENSMUSG00000041594 | <i>Tmtc4</i>        | 1.06 | 0.37 | 1.33 | 0.99 |
| ENSMUSG00000041598 | <i>Cdc42ep4</i>     | 4.65 | 5.36 | 4.8  | 4.79 |
| ENSMUSG00000041623 | <i>D11Wsu47e</i>    | 1.34 | 1.61 | 1.32 | 0.7  |

|                    |                      |      |      |      |      |
|--------------------|----------------------|------|------|------|------|
| ENSMUSG00000041625 | <i>BC006662</i>      | 5.96 | 6.04 | 5.72 | 5.71 |
| ENSMUSG00000041629 | <i>D11Wsu99e</i>     | 2.79 | 2.6  | 2.92 | 2.88 |
| ENSMUSG00000041632 | <i>Mrps27</i>        | 4.54 | 4.88 | 4.16 | 4.09 |
| ENSMUSG00000041638 | <i>Gcn11l</i>        | 2.86 | 3.64 | 3.38 | 3.12 |
| ENSMUSG00000041645 | <i>Ddx24</i>         | 4.52 | 4.64 | 4.56 | 4.33 |
| ENSMUSG00000041650 | <i>Pcca</i>          | 5.56 | 4.79 | 5.45 | 4.93 |
| ENSMUSG00000041654 | <i>Slc39a11</i>      | 3.32 | 3.52 | 3.05 | 2.74 |
| ENSMUSG00000041660 | <i>Bbox1</i>         | 6.34 | 5.75 | 6.19 | 5.75 |
| ENSMUSG00000041671 | <i>Pyroxd1</i>       | 2.55 | 2.05 | 2.74 | 1.97 |
| ENSMUSG00000041684 | <i>Bivm</i>          | 2.8  | 1.68 | 2.5  | 1.95 |
| ENSMUSG00000041685 | <i>Fcho2</i>         | 3.68 | 2.21 | 2.99 | 2.19 |
| ENSMUSG00000041688 | <i>Amot</i>          | 1.14 | 0.53 | 0.28 | 0.27 |
| ENSMUSG00000041697 | <i>Cox6a1</i>        | 7.44 | 8.17 | 8.13 | 8.08 |
| ENSMUSG00000041698 | <i>Slco1a1</i>       | 5.37 | 5.62 | 5.12 | 5.71 |
| ENSMUSG00000041702 | <i>Btbd7</i>         | 1.93 | 1.74 | 1.93 | 1.61 |
| ENSMUSG00000041712 | <i>5730410119Rik</i> | 3.45 | 3.38 | 3.32 | 3.28 |
| ENSMUSG00000041716 | <i>Moap1</i>         | 1.58 | 1.77 | 2.05 | 1.76 |
| ENSMUSG00000041717 | <i>Golt1a</i>        | 3.42 | 3.6  | 3.67 | 3.43 |
| ENSMUSG00000041720 | <i>Pik4ca</i>        | 3.25 | 3.43 | 3.35 | 3.17 |
| ENSMUSG00000041733 | <i>Coq5</i>          | 4.98 | 4.97 | 5    | 4.72 |
| ENSMUSG00000041736 | <i>Tspo</i>          | 5.31 | 5.46 | 5.66 | 5.51 |
| ENSMUSG00000041740 | <i>Rnf10</i>         | 6.36 | 6.66 | 6.37 | 6.11 |
| ENSMUSG00000041747 | <i>Utp15</i>         | 2.07 | 1.63 | 1.93 | 1.97 |
| ENSMUSG00000041748 | <i>NA</i>            | 3.18 | 2.76 | 3.15 | 2.93 |
| ENSMUSG00000041750 | <i>Cd1d2</i>         | 1.97 | 2.01 | 2.09 | 2.41 |
| ENSMUSG00000041757 | <i>Plekha6</i>       | 3.41 | 3.73 | 3.52 | 3.38 |
| ENSMUSG00000041762 | <i>Gpr155</i>        | 3.08 | 2.83 | 3.27 | 2.88 |
| ENSMUSG00000041763 | <i>Tpp2</i>          | 3.88 | 3.2  | 3.68 | 3.12 |
| ENSMUSG00000041765 | <i>Ubac2</i>         | 4.43 | 4.66 | 4.64 | 4.53 |
| ENSMUSG00000041769 | <i>Ppp2r2d</i>       | 5.13 | 4.6  | 4.6  | 4.15 |
| ENSMUSG00000041773 | <i>Enc1</i>          | 1.56 | 1.09 | 0.82 | 0.24 |

|                    |                 |       |      |      |      |
|--------------------|-----------------|-------|------|------|------|
| ENSMUSG00000041775 | <i>Mapklip1</i> | 2.65  | 2.34 | 2.46 | 2.1  |
| ENSMUSG00000041779 | <i>Tram2</i>    | 1.42  | 1.78 | 2.1  | 2.05 |
| ENSMUSG00000041781 | <i>Cpsf2</i>    | 2.87  | 2.96 | 2.87 | 2.45 |
| ENSMUSG00000041782 | <i>Lad1</i>     | 2.3   | 3.34 | 3.06 | 2.08 |
| ENSMUSG00000041798 | <i>Gck</i>      | 6.26  | 7.85 | 6.29 | 6.93 |
| ENSMUSG00000041815 | <i>Poldip3</i>  | 4.77  | 4.58 | 4.77 | 4.18 |
| ENSMUSG00000041827 | <i>Oasl1</i>    | 1.22  | 1.23 | 0.71 | 1.64 |
| ENSMUSG00000041828 | <i>Abca8a</i>   | 5.1   | 4.95 | 4.73 | 4.71 |
| ENSMUSG00000041837 | <i>Pdcd7</i>    | 1.93  | 2.23 | 2.15 | 1.94 |
| ENSMUSG00000041840 | <i>Ccdc5</i>    | 1.79  | 1.38 | 2.28 | 1.28 |
| ENSMUSG00000041841 | <i>Rpl37</i>    | 1.77  | 1.9  | 2.59 | 2.41 |
| ENSMUSG00000041845 | <i>Rhod</i>     | 3.74  | 4.02 | 3.21 | 3.3  |
| ENSMUSG00000041846 | <i>Smek1</i>    | 4.72  | 3.57 | 4.1  | 3.82 |
| ENSMUSG00000041849 | <i>NA</i>       | 3.07  | 2.26 | 3.13 | 2.6  |
| ENSMUSG00000041852 | <i>Tcf20</i>    | 2.52  | 2.42 | 2.51 | 2.18 |
| ENSMUSG00000041859 | <i>Mcm3</i>     | 1.17  | 1.27 | 1.49 | 1    |
| ENSMUSG00000041870 | <i>Ankrd13a</i> | 4.37  | 4.13 | 4.01 | 3.53 |
| ENSMUSG00000041879 | <i>Ipo9</i>     | 3.25  | 3.22 | 2.96 | 2.83 |
| ENSMUSG00000041881 | <i>Ndufa7</i>   | 5.32  | 5.69 | 5.56 | 5.48 |
| ENSMUSG00000041890 | <i>Git2</i>     | 2.32  | 2.5  | 2.54 | 2.42 |
| ENSMUSG00000041891 | <i>Lman1</i>    | 6.63  | 5.87 | 6.27 | 5.83 |
| ENSMUSG00000041895 | <i>Wipi1</i>    | 2.24  | 2.66 | 2.44 | 2.43 |
| ENSMUSG00000041915 | <i>Ammecr1l</i> | 4.78  | 4.37 | 4.49 | 4.54 |
| ENSMUSG00000041920 | <i>Slc16a6</i>  | 2.04  | 1.88 | 1.44 | 1.01 |
| ENSMUSG00000041921 | <i>Metap1l</i>  | 4     | 4.29 | 4.18 | 3.66 |
| ENSMUSG00000041926 | <i>Rnpep</i>    | 3.62  | 4.22 | 4.33 | 4.01 |
| ENSMUSG00000041930 | <i>BC057022</i> | -0.28 | 1.61 | 1.56 | 1.02 |
| ENSMUSG00000041935 | <i>AW549877</i> | 3.49  | 2.46 | 3.06 | 2.49 |
| ENSMUSG00000041936 | <i>Agrn</i>     | 2.21  | 2.52 | 2.02 | 2    |
| ENSMUSG00000041939 | <i>Mvk</i>      | 3.91  | 4.68 | 3.36 | 3.18 |
| ENSMUSG00000041949 | <i>Tmco7</i>    | 0.95  | 1.55 | 1.33 | 1.44 |

|                    |                     |      |      |      |      |
|--------------------|---------------------|------|------|------|------|
| ENSMUSG00000041957 | <i>Pkp2</i>         | 4.35 | 3.96 | 4.14 | 3.7  |
| ENSMUSG00000041958 | <i>Pigs</i>         | 3.04 | 3.94 | 3.49 | 3.14 |
| ENSMUSG00000041959 | <i>S100a10</i>      | 7.28 | 6.68 | 7.08 | 6.65 |
| ENSMUSG00000041961 | <i>Znrf3</i>        | 1.28 | 1    | 1.55 | 1.34 |
| ENSMUSG00000041966 | <i>4833418A01Ri</i> | 1.78 | 1.23 | 1.43 | 0.96 |
| ENSMUSG00000041974 | <i>2310008H04Ri</i> | 1.9  | 1.27 | 1.56 | 0.88 |
| ENSMUSG00000041975 | <i>Mettl8</i>       | 3.25 | 2.76 | 3.07 | 2.67 |
| ENSMUSG00000041977 | <i>Arhgef11</i>     | 3.32 | 3.56 | 3.73 | 3.46 |
| ENSMUSG00000041992 | <i>Rapgef5</i>      | 1.07 | 0.9  | 0.58 | 0.31 |
| ENSMUSG00000041995 | <i>Zbed3</i>        | 2.2  | 2.05 | 2.5  | 1.9  |
| ENSMUSG00000041997 | <i>Tlk1</i>         | 4.62 | 4.03 | 4.43 | 3.94 |
| ENSMUSG00000042010 | <i>Acacb</i>        | 4.44 | 4.17 | 4.11 | 3.27 |
| ENSMUSG00000042015 | <i>Wdr41</i>        | 3.13 | 2.9  | 3.09 | 2.67 |
| ENSMUSG00000042032 | <i>Mat2b</i>        | 3.43 | 2.88 | 3.49 | 3.11 |
| ENSMUSG00000042041 | <i>2010003K11Ri</i> | 3.52 | 3.59 | 4.23 | 3.96 |
| ENSMUSG00000042042 | <i>Galnact2</i>     | 2.47 | 1.89 | 2.35 | 1.47 |
| ENSMUSG00000042043 | <i>Tbca</i>         | 4.13 | 1.41 | 3.26 | 2.95 |
| ENSMUSG00000042046 | <i>Ripk5</i>        | 1.97 | 1.61 | 1.55 | 1.22 |
| ENSMUSG00000042055 | <i>Brwd2</i>        | 3.35 | 2.94 | 3.55 | 2.87 |
| ENSMUSG00000042063 | <i>mKIAA4205</i>    | 2.24 | 2.06 | 1.84 | 1.59 |
| ENSMUSG00000042066 | <i>Tmcc2</i>        | 0.71 | 1.38 | 1.27 | 1.18 |
| ENSMUSG00000042073 | <i>Abhd14b</i>      | 6.95 | 7.45 | 7.61 | 7.24 |
| ENSMUSG00000042079 | <i>Hnrpf</i>        | 2.56 | 2.56 | 2.98 | 2.45 |
| ENSMUSG00000042082 | <i>Arsb</i>         | 3.41 | 2.96 | 3.38 | 2.8  |
| ENSMUSG00000042099 | <i>Ankrd47</i>      | 1.17 | 2.05 | 1.04 | 1.21 |
| ENSMUSG00000042102 | <i>Dmgdh</i>        | 8.39 | 7.67 | 8.34 | 7.57 |
| ENSMUSG00000042105 | <i>Inpp5f</i>       | 2.48 | 2.47 | 2.54 | 2.34 |
| ENSMUSG00000042111 | <i>Ccdc115</i>      | 2.65 | 2.8  | 2.94 | 2.66 |
| ENSMUSG00000042118 | <i>Bhmt2</i>        | 7.77 | 7.59 | 7.61 | 7.11 |
| ENSMUSG00000042121 | <i>Ssh1</i>         | 1.8  | 2.3  | 2.14 | 1.93 |
| ENSMUSG00000042129 | <i>Rassf4</i>       | 1.45 | 0.83 | 1.32 | 0.95 |

|                    |                     |      |      |      |      |
|--------------------|---------------------|------|------|------|------|
| ENSMUSG00000042133 | <i>Ppig</i>         | 3.35 | 2.61 | 3    | 2.23 |
| ENSMUSG00000042138 | <i>BC024479</i>     | 1.39 | 1.2  | 1.41 | 0.83 |
| ENSMUSG00000042148 | <i>Cox10</i>        | 2.85 | 3.18 | 3.7  | 3.24 |
| ENSMUSG00000042165 | <i>NA</i>           | 1.25 | 2.14 | 1.95 | 2.89 |
| ENSMUSG00000042167 | <i>Papd4</i>        | 1.85 | 1.05 | 1.92 | 1.53 |
| ENSMUSG00000042178 | <i>Armc5</i>        | 2.02 | 3.27 | 2.6  | 2.29 |
| ENSMUSG00000042185 | <i>Nfrkb</i>        | 1.2  | 1.61 | 1.55 | 1.41 |
| ENSMUSG00000042198 | <i>Chchd7</i>       | 3.15 | 3.04 | 3.3  | 2.88 |
| ENSMUSG00000042202 | <i>A530082C11R1</i> | 4.56 | 3.77 | 4.57 | 4.11 |
| ENSMUSG00000042203 | <i>Tbcd22b</i>      | 0.94 | 1.72 | 1.23 | 1.17 |
| ENSMUSG00000042207 | <i>Jarid1b</i>      | 2.17 | 2.17 | 2.43 | 2.02 |
| ENSMUSG00000042208 | <i>0610010F05R1</i> | 2.55 | 1.6  | 2.5  | 1.93 |
| ENSMUSG00000042210 | <i>Abhd14a</i>      | 2.23 | 2.04 | 2.52 | 2.25 |
| ENSMUSG00000042211 | <i>Fbxo38</i>       | 3.53 | 3.15 | 3.27 | 3.03 |
| ENSMUSG00000042213 | <i>Anub11</i>       | 4.42 | 2.61 | 3.31 | 2.67 |
| ENSMUSG00000042228 | <i>Lyn</i>          | 3.5  | 3.53 | 3.6  | 3.41 |
| ENSMUSG00000042229 | <i>Rabif</i>        | 3.43 | 3.21 | 3.09 | 2.83 |
| ENSMUSG00000042246 | <i>Tmc7</i>         | 1.04 | 0.73 | 0.8  | 0.31 |
| ENSMUSG00000042248 | <i>Cyp2c37</i>      | 8.64 | 7.87 | 7.83 | 7.55 |
| ENSMUSG00000042251 | <i>4732466D17R1</i> | 7.06 | 6.96 | 6.84 | 6.6  |
| ENSMUSG00000042271 | <i>Nxt2</i>         | 4.41 | 3.07 | 3.98 | 3.36 |
| ENSMUSG00000042275 | <i>Pelo</i>         | 3.29 | 3.61 | 3.07 | 3.42 |
| ENSMUSG00000042284 | <i>Itgal</i>        | 2.82 | 2.24 | 2.52 | 2.41 |
| ENSMUSG00000042286 | <i>Stab1</i>        | 3.29 | 4.11 | 3.22 | 3.24 |
| ENSMUSG00000042289 | <i>Hsd3b7</i>       | 7.77 | 8.43 | 7.82 | 7.66 |
| ENSMUSG00000042292 | <i>Mkl1</i>         | 1.56 | 2.4  | 2.01 | 2.1  |
| ENSMUSG00000042293 | <i>NA</i>           | 4.54 | 5.07 | 5.25 | 4.96 |
| ENSMUSG00000042298 | <i>Ttc19</i>        | 2.78 | 2.23 | 2.73 | 2.2  |
| ENSMUSG00000042302 | <i>Ehbp1</i>        | 1.86 | 1.27 | 1.74 | 0.65 |
| ENSMUSG00000042303 | <i>Sgsm3</i>        | 1.88 | 2.47 | 2.23 | 2.17 |
| ENSMUSG00000042305 | <i>Tmem183a</i>     | 6.17 | 5.49 | 5.73 | 5.28 |



|                    |                     |      |      |      |      |
|--------------------|---------------------|------|------|------|------|
| ENSMUSG00000042308 | <i>Setd1a</i>       | 2.52 | 2.94 | 2.46 | 2.33 |
| ENSMUSG00000042312 | <i>SI00a13</i>      | 5.37 | 3.64 | 5.63 | 5.7  |
| ENSMUSG00000042323 | <i>Pbrm1</i>        | 3.6  | 2.68 | 3.57 | 2.93 |
| ENSMUSG00000042328 | <i>AK008458</i>     | 2.64 | 2.6  | 3.06 | 2.16 |
| ENSMUSG00000042333 | <i>Tnfrsf14</i>     | 2.82 | 2.48 | 2.74 | 2.28 |
| ENSMUSG00000042340 | <i>Ctfl</i>         | 2.11 | 2.12 | 1.96 | 1.55 |
| ENSMUSG00000042348 | <i>Arl15</i>        | 2.73 | 1.83 | 2.85 | 2.02 |
| ENSMUSG00000042349 | <i>Ikbke</i>        | 2.43 | 2.69 | 2    | 1.8  |
| ENSMUSG00000042350 | <i>1110018G07Ri</i> | 3.91 | 3.64 | 4    | 3.53 |
| ENSMUSG00000042354 | <i>Gnl3</i>         | 4.31 | 3.73 | 4.07 | 3.87 |
| ENSMUSG00000042363 | <i>1110067D22Ri</i> | 4.59 | 4.04 | 3.34 | 2.16 |
| ENSMUSG00000042364 | <i>Snagl</i>        | 3.35 | 3.09 | 3.19 | 3.07 |
| ENSMUSG00000042369 | <i>Rbm45</i>        | 3.18 | 2.67 | 2.63 | 2.65 |
| ENSMUSG00000042380 | <i>BC003266</i>     | 3.73 | 4.43 | 4.01 | 4.1  |
| ENSMUSG00000042389 | <i>Tsen2</i>        | 1.22 | 2.26 | 1.91 | 1.76 |
| ENSMUSG00000042390 | <i>Gatad2b</i>      | 2.93 | 2.81 | 2.87 | 2.66 |
| ENSMUSG00000042396 | <i>Rbm7</i>         | 5.09 | 3.79 | 4.57 | 4.35 |
| ENSMUSG00000042404 | <i>Dennd4b</i>      | 0.09 | 0.8  | 1.06 | 0.14 |
| ENSMUSG00000042406 | <i>Atf4</i>         | 5.91 | 6.36 | 6.24 | 6.22 |
| ENSMUSG00000042408 | <i>Zmym6</i>        | 1.46 | 0.17 | 1.6  | 0.95 |
| ENSMUSG00000042410 | <i>Agps</i>         | 2.39 | 1.49 | 2.1  | 1.42 |
| ENSMUSG00000042419 | <i>Nfkbil1</i>      | 1.58 | 2.37 | 2.71 | 2.31 |
| ENSMUSG00000042423 | <i>NA</i>           | 3.64 | 4.15 | 3.88 | 3.79 |
| ENSMUSG00000042426 | <i>Dhx29</i>        | 2.09 | 1.96 | 1.98 | 1.76 |
| ENSMUSG00000042429 | <i>Adoral</i>       | 3    | 3.41 | 3.6  | 3.42 |
| ENSMUSG00000042444 | <i>B230380D07R</i>  | 1.59 | 1.1  | 1.86 | 1.12 |
| ENSMUSG00000042446 | <i>NA</i>           | 1.63 | 0.56 | 1.09 | 0.63 |
| ENSMUSG00000042447 | <i>BC020002</i>     | 1.99 | 1.52 | 1.52 | 1.38 |
| ENSMUSG00000042451 | <i>Mybph</i>        | 1    | 1.09 | 1.78 | 1.58 |
| ENSMUSG00000042453 | <i>Reln</i>         | 2.97 | 3.25 | 2.61 | 3.05 |
| ENSMUSG00000042460 | <i>C1galt1</i>      | 4.04 | 3.31 | 3.47 | 3.03 |

|                    |                     |       |       |      |       |
|--------------------|---------------------|-------|-------|------|-------|
| ENSMUSG00000042462 | <i>2410015N17R1</i> | 4.83  | 4.94  | 5.66 | 5.17  |
| ENSMUSG00000042472 | <i>Zfp410</i>       | 3.25  | 3.36  | 3.05 | 2.98  |
| ENSMUSG00000042473 | <i>Tbc1d8b</i>      | 3.02  | 2.22  | 2.37 | 2.17  |
| ENSMUSG00000042474 | <i>Faim3</i>        | -2.38 | -2.97 | 1.27 | -2.38 |
| ENSMUSG00000042476 | <i>Abcb4</i>        | 6.92  | 6.26  | 6.62 | 6.14  |
| ENSMUSG00000042485 | <i>Mustn1</i>       | 2.27  | 2.97  | 2.91 | 3.07  |
| ENSMUSG00000042487 | <i>Leo1</i>         | 3.55  | 3.61  | 2.72 | 2.45  |
| ENSMUSG00000042492 | <i>Tbc1d10b</i>     | 2.21  | 2.47  | 2.32 | 2.2   |
| ENSMUSG00000042502 | <i>Cd2bp2</i>       | 2.87  | 3.77  | 3.51 | 3.53  |
| ENSMUSG00000042505 | <i>Acn9</i>         | 1.67  | 1.06  | 1.14 | 0.71  |
| ENSMUSG00000042506 | <i>Usp22</i>        | 3.68  | 3.66  | 3.73 | 3.18  |
| ENSMUSG00000042507 | <i>NA</i>           | 1.55  | 1.88  | 1.62 | 1.17  |
| ENSMUSG00000042508 | <i>Dmtf1</i>        | 3.1   | 2.53  | 2.67 | 2.36  |
| ENSMUSG00000042510 | <i>AA986860</i>     | 1.3   | 1.89  | 1.42 | 1.76  |
| ENSMUSG00000042520 | <i>Ubap2l</i>       | 3.8   | 4.04  | 4.11 | 3.8   |
| ENSMUSG00000042524 | <i>Unc84b</i>       | 4.68  | 4.83  | 5.19 | 4.93  |
| ENSMUSG00000042535 | <i>Gtpbp1</i>       | 3.25  | 3.63  | 3.6  | 3.36  |
| ENSMUSG00000042541 | <i>Shfm1</i>        | 6.06  | 6.13  | 6.25 | 5.94  |
| ENSMUSG00000042548 | <i>Asxl1</i>        | 2.51  | 2.46  | 2.16 | 2.04  |
| ENSMUSG00000042557 | <i>Sin3a</i>        | 3.64  | 3.4   | 3.12 | 3.08  |
| ENSMUSG00000042558 | <i>Adprhl2</i>      | 2.88  | 3.67  | 2.88 | 2.85  |
| ENSMUSG00000042569 | <i>Dhrs7b</i>       | 3.05  | 3.13  | 3.16 | 2.92  |
| ENSMUSG00000042570 | <i>Mier2</i>        | 2.23  | 3.03  | 2.13 | 2.08  |
| ENSMUSG00000042572 | <i>Ube2q1</i>       | 4.2   | 4.53  | 4.24 | 4.26  |
| ENSMUSG00000042589 | <i>Cutl2</i>        | 2.21  | 1.69  | 0.21 | 1.89  |
| ENSMUSG00000042590 | <i>Ipo11</i>        | 2.66  | 2.39  | 2.41 | 1.94  |
| ENSMUSG00000042594 | <i>Sh2b3</i>        | 2.87  | 3.2   | 3.36 | 2.88  |
| ENSMUSG00000042595 | <i>BC031748</i>     | 1.01  | 0.04  | 0.65 | -0.02 |
| ENSMUSG00000042599 | <i>Jhdm1d</i>       | 1.95  | 0.78  | 1.7  | 0.95  |
| ENSMUSG00000042605 | <i>Atxn2</i>        | 4.45  | 4.56  | 4.97 | 4.64  |
| ENSMUSG00000042608 | <i>Stk40</i>        | 4.18  | 4.84  | 4.01 | 4.14  |

|                    |                    |      |       |      |       |
|--------------------|--------------------|------|-------|------|-------|
| ENSMUSG00000042613 | <i>Pbxip1</i>      | 1.49 | 2.1   | 2.17 | 1.97  |
| ENSMUSG00000042622 | <i>Maff</i>        | 1.73 | 0.37  | 1.94 | 1.17  |
| ENSMUSG00000042625 | <i>Safb2</i>       | 3.16 | 3.75  | 3.46 | 3.03  |
| ENSMUSG00000042626 | <i>Shc1</i>        | 3.84 | 3.89  | 3.59 | 3.54  |
| ENSMUSG00000042628 | <i>Zfyve1</i>      | 4.86 | 4.81  | 4.96 | 4.51  |
| ENSMUSG00000042632 | <i>Pla2g6</i>      | 3.94 | 4.16  | 4.42 | 3.71  |
| ENSMUSG00000042638 | <i>Gucy2c</i>      | 0.71 | -0.22 | 1.03 | -0.08 |
| ENSMUSG00000042642 | <i>Flad1</i>       | 4.42 | 4.96  | 4.65 | 4.53  |
| ENSMUSG00000042647 | <i>NA</i>          | 1.94 | 1.86  | 2.45 | 1.87  |
| ENSMUSG00000042650 | <i>Alkbh5</i>      | 5.06 | 5.06  | 5.2  | 5.03  |
| ENSMUSG00000042659 | <i>Arrdc4</i>      | 3.27 | 2.79  | 3.35 | 3.02  |
| ENSMUSG00000042660 | <i>Wdr55</i>       | 3.38 | 4.05  | 3.34 | 3.43  |
| ENSMUSG00000042670 | <i>Immp1l</i>      | 2.2  | 0.06  | 1.23 | 1.23  |
| ENSMUSG00000042675 | <i>Ypel3</i>       | 4    | 4.12  | 4.37 | 4.23  |
| ENSMUSG00000042680 | <i>Gm944</i>       | 3.63 | 3.7   | 3.74 | 3.59  |
| ENSMUSG00000042682 | <i>Selk</i>        | 4.86 | 4.08  | 4.46 | 4.04  |
| ENSMUSG00000042688 | <i>Mapk6</i>       | 4.21 | 3.42  | 3.96 | 3.42  |
| ENSMUSG00000042694 | <i>Obfc1</i>       | 1.09 | 1.05  | 1.27 | 1.09  |
| ENSMUSG00000042699 | <i>Dhx9</i>        | 4.43 | 3.74  | 4.22 | 3.91  |
| ENSMUSG00000042700 | <i>Sipa1l1</i>     | 2.62 | 2.76  | 2.68 | 2.6   |
| ENSMUSG00000042705 | <i>Commd10</i>     | 3.07 | 2.83  | 2.04 | 2.27  |
| ENSMUSG00000042709 | <i>Atpaf2</i>      | 4.28 | 4.26  | 4.03 | 3.93  |
| ENSMUSG00000042712 | <i>Wbp5</i>        | 4.23 | 2.88  | 3.66 | 3.44  |
| ENSMUSG00000042719 | <i>C330023M02R</i> | 3.39 | 3.13  | 2.8  | 2.37  |
| ENSMUSG00000042726 | <i>Trafd1</i>      | 3.92 | 4.04  | 4.07 | 3.95  |
| ENSMUSG00000042729 | <i>Wdr74</i>       | 4.03 | 4.61  | 4.26 | 4.3   |
| ENSMUSG00000042737 | <i>Dpm3</i>        | 3.8  | 3.83  | 3.94 | 4.27  |
| ENSMUSG00000042742 | <i>B630005N14R</i> | 2.06 | 1.69  | 1.49 | 1.15  |
| ENSMUSG00000042744 | <i>NA</i>          | 1.72 | 1.97  | 2.05 | 1.69  |
| ENSMUSG00000042745 | <i>Id1</i>         | 2.18 | 3.42  | 1.73 | 1.22  |
| ENSMUSG00000042747 | <i>Krtcap2</i>     | 5.95 | 5.66  | 6.05 | 6.1   |

|                    |                     |      |      |      |      |
|--------------------|---------------------|------|------|------|------|
| ENSMUSG00000042770 | <i>Hebp1</i>        | 7.68 | 8.13 | 8.18 | 7.96 |
| ENSMUSG00000042772 | <i>Smg7</i>         | 3.63 | 3.19 | 3.68 | 3.48 |
| ENSMUSG00000042790 | <i>D130054N24R</i>  | 3.74 | 3.34 | 3.74 | 3.21 |
| ENSMUSG00000042797 | <i>Aqp11</i>        | 5.71 | 5.07 | 6.18 | 5.36 |
| ENSMUSG00000042814 | <i>Mcts2</i>        | 1.8  | 2.11 | 2.49 | 2.42 |
| ENSMUSG00000042831 | <i>Alkbh6</i>       | 2.83 | 3.14 | 2.82 | 2.96 |
| ENSMUSG00000042834 | <i>D0H4S114</i>     | 2.44 | 2.68 | 1.34 | 1.16 |
| ENSMUSG00000042874 | <i>NA</i>           | 2.72 | 4.11 | 2.88 | 2.87 |
| ENSMUSG00000042878 | <i>Ccdc85b</i>      | 1.68 | 3.14 | 2.21 | 2.61 |
| ENSMUSG00000042903 | <i>Foxo4</i>        | 3.89 | 4.23 | 3.74 | 3.68 |
| ENSMUSG00000042922 | <i>NA</i>           | 2.18 | 2.89 | 2.64 | 2.52 |
| ENSMUSG00000042962 | <i>NA</i>           | 5.63 | 3.78 | 5.15 | 6.04 |
| ENSMUSG00000042969 | <i>NA</i>           | 1.12 | 1.42 | 1.91 | 1.8  |
| ENSMUSG00000042978 | <i>Sbkl</i>         | 3.57 | 3.8  | 4.34 | 4.13 |
| ENSMUSG00000042988 | <i>Notum</i>        | 3.89 | 4.77 | 4.74 | 4.56 |
| ENSMUSG00000042992 | <i>Loh12cr1</i>     | 2.54 | 2.93 | 2.86 | 2.77 |
| ENSMUSG00000042997 | <i>8030451K01Ri</i> | 2.93 | 2.65 | 2.81 | 2.57 |
| ENSMUSG00000043008 | <i>Klhl6</i>        | 0.76 | 0.96 | 1.14 | 0.1  |
| ENSMUSG00000043013 | <i>Onecut1</i>      | 3.56 | 2.82 | 1.62 | 3.07 |
| ENSMUSG00000043019 | <i>EDEM3</i>        | 3.9  | 3.39 | 3.46 | 2.94 |
| ENSMUSG00000043059 | <i>Zfp513</i>       | 2.13 | 2.32 | 1.83 | 2.07 |
| ENSMUSG00000043061 | <i>Tmem18</i>       | 3.53 | 3.28 | 3.43 | 3.13 |
| ENSMUSG00000043067 | <i>Dpy1911</i>      | 4.01 | 3.35 | 3.77 | 3.53 |
| ENSMUSG00000043068 | <i>2310031A18Ri</i> | 2.74 | 4.18 | 3.34 | 3.18 |
| ENSMUSG00000043085 | <i>Tmem82</i>       | 4.11 | 4.89 | 4.45 | 4.55 |
| ENSMUSG00000043090 | <i>D330038O06R</i>  | 1.31 | 1.52 | 1.58 | 1.01 |
| ENSMUSG00000043091 | <i>Tuba1c</i>       | 2.94 | 3.15 | 2.57 | 2.53 |
| ENSMUSG00000043131 | <i>Mobkl1b</i>      | 4.85 | 4.31 | 4.43 | 4.01 |
| ENSMUSG00000043140 | <i>Tmem186</i>      | 2.77 | 3.02 | 3.17 | 2.55 |
| ENSMUSG00000043146 | <i>NA</i>           | 2.36 | 2.57 | 2.12 | 2.17 |
| ENSMUSG00000043154 | <i>NA</i>           | 2.69 | 1.66 | 2.42 | 2.01 |

|                    |                     |      |       |       |      |
|--------------------|---------------------|------|-------|-------|------|
| ENSMUSG00000043162 | <i>Pigy</i>         | 4.85 | 5.38  | 4.96  | 4.63 |
| ENSMUSG00000043183 | <i>4732471D19Ri</i> | 0.66 | 1.04  | 1.1   | 0.99 |
| ENSMUSG00000043190 | <i>Rfefd</i>        | 2.13 | 1.1   | 2.17  | 1.48 |
| ENSMUSG00000043192 | <i>NA</i>           | 3.9  | 3.08  | 3.7   | 4.54 |
| ENSMUSG00000043207 | <i>Zmpste24</i>     | 5.34 | 4.72  | 5.03  | 4.57 |
| ENSMUSG00000043241 | <i>Upf2</i>         | 2.99 | 2.48  | 2.86  | 2.32 |
| ENSMUSG00000043252 | <i>Tmem64</i>       | 4.82 | 3.88  | 4.22  | 3.66 |
| ENSMUSG00000043257 | <i>Pigv</i>         | 1.85 | 2.11  | 2.07  | 1.84 |
| ENSMUSG00000043270 | <i>NA</i>           | 1.17 | 0.24  | 0.86  | 1.24 |
| ENSMUSG00000043279 | <i>Trim56</i>       | 1.57 | 1.22  | 1.28  | 1.43 |
| ENSMUSG00000043284 | <i>Tmem11</i>       | 4.44 | 4.71  | 4.65  | 4.63 |
| ENSMUSG00000043290 | <i>Zfp784</i>       | 1.15 | 1.9   | 1.69  | 1.2  |
| ENSMUSG00000043300 | <i>B3galnt1</i>     | 1.35 | -0.22 | 0.87  | 1.02 |
| ENSMUSG00000043311 | <i>D17H6S53E</i>    | 2.94 | 2.95  | 2.75  | 2.52 |
| ENSMUSG00000043323 | <i>2410025L10Ri</i> | 1.25 | 2.02  | 1.93  | 1.71 |
| ENSMUSG00000043336 | <i>NA</i>           | 1.45 | 1.05  | 1.69  | 1.18 |
| ENSMUSG00000043391 | <i>2510009E07Ri</i> | 1.91 | 1.51  | 1.49  | 1.15 |
| ENSMUSG00000043411 | <i>Usp48</i>        | 2.52 | 2.43  | 2.31  | 2.04 |
| ENSMUSG00000043415 | <i>NA</i>           | 1.95 | 1.69  | 1.87  | 1.07 |
| ENSMUSG00000043421 | <i>2310016C08Ri</i> | 1.16 | 1.29  | 0.75  | 0.4  |
| ENSMUSG00000043424 | <i>NA</i>           | 2.55 | 1.01  | 0.85  | 2.28 |
| ENSMUSG00000043432 | <i>Leng9</i>        | 1.86 | 1.83  | 2.06  | 1.69 |
| ENSMUSG00000043445 | <i>1700012G19Ri</i> | 2.93 | 4.01  | 3.34  | 3.5  |
| ENSMUSG00000043484 | <i>NA</i>           | 2.48 | 1.24  | 0.68  | 1.43 |
| ENSMUSG00000043488 | <i>NA</i>           | 1.53 | -0.61 | 1.5   | 0.64 |
| ENSMUSG00000043510 | <i>Hscb</i>         | 2.14 | 2.47  | 2.67  | 2.32 |
| ENSMUSG00000043535 | <i>Setx</i>         | 2.23 | 1.52  | 2.01  | 1.18 |
| ENSMUSG00000043574 | <i>NA</i>           | 1.52 | -0.26 | -0.26 | 0.4  |
| ENSMUSG00000043587 | <i>Acpl2</i>        | 0.24 | 0.11  | 1.07  | 0.36 |
| ENSMUSG00000043618 | <i>NA</i>           | 4.93 | 4.81  | 4.44  | 4.84 |
| ENSMUSG00000043681 | <i>2200001115Ri</i> | 3.09 | 2.48  | 4.73  | 5.54 |

|                    |                      |      |      |      |       |
|--------------------|----------------------|------|------|------|-------|
| ENSMUSG00000043683 | <i>Fem1a</i>         | 3.73 | 4.19 | 3.52 | 3.4   |
| ENSMUSG00000043687 | <i>I190005I06Rik</i> | 1.94 | 2.52 | 2.7  | 3.01  |
| ENSMUSG00000043688 | <i>NA</i>            | 2.62 | 3.19 | 2.76 | 2.67  |
| ENSMUSG00000043702 | <i>E430028B21Rt</i>  | 2.58 | 3.18 | 2.52 | 2.67  |
| ENSMUSG00000043716 | <i>Rpl7</i>          | 4.32 | 4.41 | 4.41 | 3.61  |
| ENSMUSG00000043733 | <i>Ptpn11</i>        | 4.44 | 4.62 | 4.39 | 4.25  |
| ENSMUSG00000043770 | <i>NA</i>            | 4.57 | 4.45 | 5.71 | 5.91  |
| ENSMUSG00000043773 | <i>NA</i>            | 1.31 | 0.8  | 1.28 | -0.15 |
| ENSMUSG00000043789 | <i>NA</i>            | 3.23 | 3.46 | 3.76 | 3.6   |
| ENSMUSG00000043801 | <i>NA</i>            | 4.23 | 4.65 | 4.31 | 5.04  |
| ENSMUSG00000043831 | <i>Lysmd4</i>        | 2.6  | 2.8  | 2.05 | 2.28  |
| ENSMUSG00000043832 | <i>Clec4a3</i>       | 1.27 | 0.55 | 0.92 | 0.43  |
| ENSMUSG00000043858 | <i>Nup62</i>         | 3.37 | 3.69 | 3.19 | 3.4   |
| ENSMUSG00000043866 | <i>Taf10</i>         | 4.69 | 4.58 | 4.36 | 4.32  |
| ENSMUSG00000043872 | <i>Zmym1</i>         | 1    | 0.05 | 0.7  | 0.63  |
| ENSMUSG00000043881 | <i>Kbtbd7</i>        | 2.81 | 1.9  | 2.42 | 2.04  |
| ENSMUSG00000043885 | <i>Slc36a4</i>       | 1.39 | 0.92 | 0.63 | 1.1   |
| ENSMUSG00000043895 | <i>Edg5</i>          | 0.98 | 1.4  | 1.45 | 1.37  |
| ENSMUSG00000043909 | <i>Trp53bp1</i>      | 2.14 | 2.06 | 1.87 | 1.65  |
| ENSMUSG00000043923 | <i>Ccdc84</i>        | 3.18 | 3.07 | 2.99 | 3.08  |
| ENSMUSG00000043940 | <i>mKIAA0993</i>     | 2.03 | 2.14 | 2.24 | 2.02  |
| ENSMUSG00000043962 | <i>Thrap3</i>        | 2.73 | 2.35 | 2.8  | 2.21  |
| ENSMUSG00000043964 | <i>Orai3</i>         | 3.73 | 3.93 | 3.62 | 3.63  |
| ENSMUSG00000043987 | <i>Cep164</i>        | 0.89 | 1.74 | 1.87 | 1.93  |
| ENSMUSG00000043991 | <i>Pura</i>          | 2.94 | 3.76 | 3.23 | 2.82  |
| ENSMUSG00000043998 | <i>NA</i>            | 5.42 | 5.35 | 5.2  | 5.1   |
| ENSMUSG00000044005 | <i>Gls2</i>          | 8.15 | 7.89 | 8.13 | 7.48  |
| ENSMUSG00000044018 | <i>Mrpl50</i>        | 5.88 | 5.18 | 5.6  | 5.17  |
| ENSMUSG00000044026 | <i>Tmem20</i>        | 4.72 | 3.55 | 4.44 | 4.01  |
| ENSMUSG00000044030 | <i>Irf2bp1</i>       | 2.93 | 3.94 | 3.41 | 3.45  |
| ENSMUSG00000044037 | <i>Als2cl</i>        | 2.8  | 2.86 | 2.87 | 2.44  |

|                    |                     |      |       |      |       |
|--------------------|---------------------|------|-------|------|-------|
| ENSMUSG00000044066 | <i>Cep68</i>        | 2.4  | 2.62  | 2.49 | 2.23  |
| ENSMUSG00000044068 | <i>Zrsr1</i>        | 3.2  | 2.52  | 2.92 | 2.92  |
| ENSMUSG00000044071 | <i>AI851790</i>     | 1.66 | -0.73 | 0.6  | -1.36 |
| ENSMUSG00000044080 | <i>S100a1</i>       | 7.03 | 7.08  | 7.47 | 7.34  |
| ENSMUSG00000044098 | <i>Rsbnl</i>        | 1.67 | 0.63  | 0.96 | 0.45  |
| ENSMUSG00000044134 | <i>A230106M15R</i>  | 2.54 | 3.21  | 3.06 | 2.24  |
| ENSMUSG00000044139 | <i>BC039632</i>     | 1.91 | 2.14  | 2.25 | 2.12  |
| ENSMUSG00000044145 | <i>NA</i>           | -0.7 | 0.09  | 1.1  | 1.43  |
| ENSMUSG00000044147 | <i>Arf6</i>         | 5.04 | 5.01  | 4.83 | 4.72  |
| ENSMUSG00000044148 | <i>I810030O07R</i>  | 2.63 | 2.32  | 2.31 | 1.52  |
| ENSMUSG00000044149 | <i>Nkrf</i>         | 1.88 | 0.99  | 1.19 | 0.84  |
| ENSMUSG00000044155 | <i>Lsm8</i>         | 2.54 | 2.11  | 2.47 | 2.55  |
| ENSMUSG00000044167 | <i>Foxo1</i>        | 4.24 | 4.5   | 4.9  | 4.87  |
| ENSMUSG00000044197 | <i>Gpr146</i>       | 4.09 | 4.47  | 4.9  | 4.61  |
| ENSMUSG00000044206 | <i>Vsig4</i>        | 4.92 | 4.09  | 4.27 | 3.54  |
| ENSMUSG00000044211 | <i>NA</i>           | 3.05 | 2.36  | 3.01 | 3.86  |
| ENSMUSG00000044221 | <i>Grsfl</i>        | 6    | 5.29  | 5.91 | 5.53  |
| ENSMUSG00000044224 | <i>NA</i>           | 2.19 | 2.82  | 2.32 | 2.21  |
| ENSMUSG00000044252 | <i>Osbp11a</i>      | 5.87 | 4.54  | 5.29 | 5.19  |
| ENSMUSG00000044254 | <i>Pcsk9</i>        | 2.82 | 4.16  | 2.54 | 3.61  |
| ENSMUSG00000044258 | <i>Ctla2a</i>       | 1.72 | 0.86  | 2.63 | 1.8   |
| ENSMUSG00000044279 | <i>Crb3</i>         | 3.42 | 4.01  | 3.84 | 3.39  |
| ENSMUSG00000044308 | <i>Zfp650</i>       | 4.97 | 4.16  | 4.35 | 4.08  |
| ENSMUSG00000044328 | <i>Trp53i13</i>     | 1.79 | 2.71  | 1.86 | 1.46  |
| ENSMUSG00000044330 | <i>NA</i>           | 0.21 | -0.44 | 1.51 | 1     |
| ENSMUSG00000044339 | <i>Alkbh2</i>       | 1.44 | 1.83  | 1.87 | 1.53  |
| ENSMUSG00000044340 | <i>NA</i>           | 2.83 | 2.85  | 3.18 | 2.97  |
| ENSMUSG00000044345 | <i>NA</i>           | 3.53 | 3.76  | 4.23 | 4.21  |
| ENSMUSG00000044350 | <i>9030625A04Ri</i> | 3.08 | 2.85  | 2.29 | 2.28  |
| ENSMUSG00000044359 | <i>P2ry4</i>        | 2.75 | 1.89  | 3.01 | 2.46  |
| ENSMUSG00000044361 | <i>Eppk1</i>        | 1.28 | 1.83  | 2.33 | 1.71  |

|                    |                     |      |       |      |       |
|--------------------|---------------------|------|-------|------|-------|
| ENSMUSG00000044393 | <i>Dsg2</i>         | 3.38 | 3.83  | 3.29 | 2.94  |
| ENSMUSG00000044408 | <i>I110002B05Ri</i> | 5.36 | 4.57  | 5.14 | 4.45  |
| ENSMUSG00000044424 | <i>NA</i>           | 3.87 | 3.39  | 3.74 | 3.79  |
| ENSMUSG00000044433 | <i>2310057J16Ri</i> | 2.31 | 3.24  | 2.74 | 2.72  |
| ENSMUSG00000044434 | <i>NA</i>           | 1.38 | 0.59  | 1.37 | 2.46  |
| ENSMUSG00000044442 | <i>N6amt1</i>       | 1.24 | 0.94  | 1.06 | 0.47  |
| ENSMUSG00000044447 | <i>Dock5</i>        | 1.42 | 1.22  | 2.03 | 1.65  |
| ENSMUSG00000044452 | <i>NA</i>           | 1.99 | 1.77  | 1.93 | 1.75  |
| ENSMUSG00000044456 | <i>Rin3</i>         | 3.49 | 4.19  | 4.11 | 4.01  |
| ENSMUSG00000044465 | <i>4632419K20Ri</i> | 1.83 | 2.79  | 2.24 | 1.98  |
| ENSMUSG00000044468 | <i>NA</i>           | 2.31 | 3.05  | 2.66 | 2.71  |
| ENSMUSG00000044469 | <i>Tnfaip8l1</i>    | 4.58 | 5.37  | 4.71 | 4.43  |
| ENSMUSG00000044475 | <i>Ascc1</i>        | 4.13 | 3.61  | 3.78 | 3.8   |
| ENSMUSG00000044477 | <i>Zfand3</i>       | 5.03 | 5.24  | 5.22 | 5.12  |
| ENSMUSG00000044496 | <i>2510039O18Ri</i> | 4.04 | 4.77  | 4.2  | 4.02  |
| ENSMUSG00000044501 | <i>Zfp758</i>       | 1.66 | -0.37 | 0.79 | 0.5   |
| ENSMUSG00000044502 | <i>2310022M17Ri</i> | 3.36 | 3.67  | 3.53 | 3.14  |
| ENSMUSG00000044533 | <i>Rps2</i>         | 2.96 | 3.59  | 3.48 | 3.4   |
| ENSMUSG00000044534 | <i>Cebp2</i>        | 1.09 | 1.46  | 1.04 | 0.49  |
| ENSMUSG00000044600 | <i>9130011J15Ri</i> | 5.53 | 5.55  | 5.7  | 5.59  |
| ENSMUSG00000044617 | <i>Zbtb39</i>       | 1.81 | 2.1   | 1.65 | 1.54  |
| ENSMUSG00000044627 | <i>2900010J23Ri</i> | 6.84 | 6.13  | 6.39 | 5.89  |
| ENSMUSG00000044641 | <i>Pard6b</i>       | 2    | 2.16  | 1.94 | 1.72  |
| ENSMUSG00000044661 | <i>NA</i>           | 4.76 | 4.15  | 4.43 | 4.22  |
| ENSMUSG00000044674 | <i>Fzd1</i>         | 2.12 | 2.1   | 2.18 | 1.53  |
| ENSMUSG00000044676 | <i>Zfp612</i>       | 1    | 0.42  | 1.3  | 1.15  |
| ENSMUSG00000044700 | <i>D4Ert429e</i>    | 2.24 | 3.05  | 2.77 | 2.46  |
| ENSMUSG00000044709 | <i>Gemin7</i>       | 3.58 | 4.02  | 3.89 | 3.59  |
| ENSMUSG00000044712 | <i>NA</i>           | 1.24 | 0.3   | 0.44 | -0.13 |
| ENSMUSG00000044715 | <i>4933433P14Ri</i> | 3.05 | 2.32  | 3.28 | 2.76  |
| ENSMUSG00000044730 | <i>9930104L06Ri</i> | 0.89 | 1.61  | 1.08 | 0.35  |



|                    |                     |      |       |      |       |
|--------------------|---------------------|------|-------|------|-------|
| ENSMUSG00000044734 | <i>Serpinb1a</i>    | 3.73 | 2.11  | 2.78 | 1.26  |
| ENSMUSG00000044749 | <i>Abca6</i>        | 6.09 | 5.46  | 6.18 | 5.5   |
| ENSMUSG00000044751 | <i>NA</i>           | 2.18 | 2.11  | 2.4  | 3.01  |
| ENSMUSG00000044763 | <i>Rg9mtd1</i>      | 4.18 | 3.22  | 3.84 | 3.26  |
| ENSMUSG00000044768 | <i>D1Ert622e</i>    | 3.68 | 2.82  | 3.21 | 2.79  |
| ENSMUSG00000044783 | <i>6430706D22Rt</i> | 3.44 | 2.82  | 3.45 | 2.97  |
| ENSMUSG00000044786 | <i>Zfp36</i>        | 5.51 | 6.02  | 6.04 | 5.93  |
| ENSMUSG00000044788 | <i>Fads6</i>        | 3.61 | 4.22  | 3.93 | 4.01  |
| ENSMUSG00000044791 | <i>Setd2</i>        | 3.59 | 3.03  | 3.31 | 3.03  |
| ENSMUSG00000044792 | <i>Isca1</i>        | 4.24 | 3.83  | 4.25 | 3.97  |
| ENSMUSG00000044795 | <i>Cyb5d1</i>       | 1.6  | 1.67  | 1.4  | 1.34  |
| ENSMUSG00000044811 | <i>Cd300d</i>       | 1.36 | 1.19  | 1.44 | 1.37  |
| ENSMUSG00000044813 | <i>NA</i>           | 4.06 | 4.96  | 4.13 | 4.49  |
| ENSMUSG00000044820 | <i>AY074887</i>     | 0.13 | 2.22  | 1.63 | 1.4   |
| ENSMUSG00000044857 | <i>Lemd2</i>        | 3.3  | 4.2   | 3.89 | 3.71  |
| ENSMUSG00000044864 | <i>Ankrd50</i>      | 1.43 | 1.07  | 1.12 | 0.86  |
| ENSMUSG00000044867 | <i>Gimap1</i>       | 0.26 | 0.92  | 1.38 | -0.16 |
| ENSMUSG00000044873 | <i>NA</i>           | 0.88 | -1.72 | 1.1  | 0.65  |
| ENSMUSG00000044876 | <i>Zfp444</i>       | 2.92 | 3.54  | 3.38 | 3.18  |
| ENSMUSG00000044881 | <i>AK171117</i>     | 2.42 | 2.75  | 2.52 | 2.32  |
| ENSMUSG00000044894 | <i>Uqcrq</i>        | 6.22 | 6.34  | 6.52 | 6.51  |
| ENSMUSG00000044934 | <i>Zfp367</i>       | 1.43 | 0.95  | 1.54 | 0.9   |
| ENSMUSG00000044950 | <i>NA</i>           | 1.46 | 0.9   | 0.91 | 1.2   |
| ENSMUSG00000044952 | <i>Kctd21</i>       | 2.54 | 2.68  | 2.27 | 2.75  |
| ENSMUSG00000044965 | <i>NA</i>           | 4.95 | 5.16  | 5.07 | 5.19  |
| ENSMUSG00000044976 | <i>Wdr72</i>        | 1.68 | 2.26  | 1.02 | 0.99  |
| ENSMUSG00000044986 | <i>Tst</i>          | 7.85 | 8.55  | 7.95 | 7.54  |
| ENSMUSG00000044991 | <i>NA</i>           | 2.06 | 2.02  | 3.01 | 2.16  |
| ENSMUSG00000045038 | <i>Prkce</i>        | 1.79 | 2.22  | 1.22 | 1.74  |
| ENSMUSG00000045039 | <i>NA</i>           | 0.8  | 1.77  | 1.45 | 1.22  |
| ENSMUSG00000045078 | <i>Rnf216</i>       | 3.18 | 3.14  | 3.16 | 3.05  |

|                    |                     |      |      |      |      |
|--------------------|---------------------|------|------|------|------|
| ENSMUSG00000045087 | <i>Edg8</i>         | 0.87 | 0.98 | 1.87 | 1.29 |
| ENSMUSG00000045092 | <i>Edg1</i>         | 5.06 | 5.25 | 4.72 | 4.56 |
| ENSMUSG00000045094 | <i>4933429F08Ri</i> | 3.39 | 3.27 | 2.74 | 2.47 |
| ENSMUSG00000045095 | <i>Mag1</i>         | 2.41 | 2.68 | 2.05 | 2.23 |
| ENSMUSG00000045098 | <i>Suv420h1</i>     | 2.4  | 1.9  | 2.18 | 1.99 |
| ENSMUSG00000045100 | <i>Slc25a26</i>     | 2.72 | 2.77 | 2.69 | 2.62 |
| ENSMUSG00000045103 | <i>dystrophin</i>   | 1.77 | 0.48 | 1.85 | 1.41 |
| ENSMUSG00000045107 | <i>NA</i>           | 2.3  | 2.41 | 2.2  | 2.57 |
| ENSMUSG00000045110 | <i>NA</i>           | 3.94 | 3.39 | 3.75 | 3.28 |
| ENSMUSG00000045128 | <i>Rpl18a</i>       | 1.33 | 2.46 | 2.32 | 2.56 |
| ENSMUSG00000045140 | <i>Pigw</i>         | 1.44 | 0.24 | 1.24 | 0.67 |
| ENSMUSG00000045160 | <i>Bola3</i>        | 5.33 | 4.42 | 5.23 | 4.79 |
| ENSMUSG00000045176 | <i>2310047M10R</i>  | 2.45 | 2.32 | 2.38 | 2.22 |
| ENSMUSG00000045180 | <i>Shroom2</i>      | 2.97 | 2.84 | 2.13 | 2.23 |
| ENSMUSG00000045193 | <i>Cirbp</i>        | 1.78 | 1.63 | 2.23 | 1.71 |
| ENSMUSG00000045205 | <i>Dpy19l4</i>      | 2.37 | 1.57 | 1.88 | 0.99 |
| ENSMUSG00000045210 | <i>AK031819</i>     | 3.8  | 2.8  | 3.05 | 2.92 |
| ENSMUSG00000045211 | <i>Nudt18</i>       | 1.99 | 2.65 | 2.06 | 2.46 |
| ENSMUSG00000045216 | <i>Hs6st1</i>       | 6.09 | 6.38 | 6.36 | 6.37 |
| ENSMUSG00000045237 | <i>1110012L19Ri</i> | 2.98 | 2.81 | 3.68 | 3.88 |
| ENSMUSG00000045248 | <i>Med26</i>        | 1.47 | 1.98 | 1.56 | 1.53 |
| ENSMUSG00000045251 | <i>Zfp688</i>       | 1.04 | 1.7  | 1.08 | 1.21 |
| ENSMUSG00000045252 | <i>Zfp574</i>       | 2.93 | 3.89 | 3.28 | 3.41 |
| ENSMUSG00000045257 | <i>Morn2</i>        | 3.75 | 3.15 | 3.97 | 4.06 |
| ENSMUSG00000045259 | <i>Klhdc9</i>       | 2.09 | 1.52 | 2.1  | 1.45 |
| ENSMUSG00000045268 | <i>Zfp691</i>       | 2.45 | 2.15 | 2.44 | 2.11 |
| ENSMUSG00000045282 | <i>Tmem86b</i>      | 6.68 | 6.92 | 7.03 | 6.65 |
| ENSMUSG00000045287 | <i>Rtn4r11</i>      | 2.36 | 3.93 | 3.33 | 3.22 |
| ENSMUSG00000045294 | <i>Insig1</i>       | 5.71 | 5.73 | 5.65 | 5.51 |
| ENSMUSG00000045302 | <i>Preb</i>         | 5.41 | 6.27 | 5.51 | 5.69 |
| ENSMUSG00000045312 | <i>Lhfpl2</i>       | 1.27 | 1.72 | 1.28 | 0.95 |

|                    |                     |       |       |      |       |
|--------------------|---------------------|-------|-------|------|-------|
| ENSMUSG00000045314 | <i>Ankrd56</i>      | 2.01  | 2.91  | 1.54 | 1.29  |
| ENSMUSG00000045316 | <i>Fahd1</i>        | 4.59  | 5.08  | 5.04 | 4.82  |
| ENSMUSG00000045319 | <i>5430407P10Ri</i> | 3.21  | 3.85  | 3.21 | 3.08  |
| ENSMUSG00000045359 | <i>NA</i>           | 1.69  | 2.04  | 1.15 | -0.34 |
| ENSMUSG00000045365 | <i>NA</i>           | 2.58  | 3.35  | 2.42 | 2.93  |
| ENSMUSG00000045374 | <i>NA</i>           | 3.35  | 3.79  | 3.89 | 3.3   |
| ENSMUSG00000045377 | <i>Tmem88</i>       | 1.92  | 2.52  | 1.71 | 2.22  |
| ENSMUSG00000045382 | <i>Cxcr4</i>        | -1.72 | -0.86 | 2.05 | 0.07  |
| ENSMUSG00000045391 | <i>NA</i>           | 1.65  | -0.7  | 0.99 | 1.32  |
| ENSMUSG00000045392 | <i>Olfr1033</i>     | 2.22  | 0.71  | 1.15 | 0.72  |
| ENSMUSG00000045406 | <i>NA</i>           | 1.89  | 2.64  | 1.95 | 2.37  |
| ENSMUSG00000045409 | <i>Trim39</i>       | 1.89  | 2.21  | 1.78 | 2.08  |
| ENSMUSG00000045410 | <i>Akr1e1</i>       | 5.04  | 4.77  | 4.8  | 4.33  |
| ENSMUSG00000045414 | <i>1190002N15Ri</i> | 3.64  | 2.85  | 3.56 | 3.12  |
| ENSMUSG00000045427 | <i>Hnrph2</i>       | 2.97  | 2.6   | 2.88 | 2.55  |
| ENSMUSG00000045435 | <i>Tmem60</i>       | 4.11  | 2.75  | 3.95 | 3.36  |
| ENSMUSG00000045438 | <i>Cox19</i>        | 4.85  | 4.78  | 5.08 | 4.83  |
| ENSMUSG00000045441 | <i>Gprin3</i>       | 2.94  | 2.02  | 2.56 | 2.05  |
| ENSMUSG00000045472 | <i>NA</i>           | 3.24  | 4.17  | 3.51 | 3.55  |
| ENSMUSG00000045482 | <i>Trrap</i>        | 1.78  | 2.16  | 2    | 1.62  |
| ENSMUSG00000045503 | <i>Sys1</i>         | 4.43  | 4.95  | 4.44 | 4.36  |
| ENSMUSG00000045538 | <i>Ddx28</i>        | 3.19  | 3.38  | 2.95 | 2.9   |
| ENSMUSG00000045546 | <i>Rnf113a2</i>     | 2.57  | 2.42  | 2.83 | 2.84  |
| ENSMUSG00000045551 | <i>Fpr1</i>         | 1.99  | 1.58  | 1.31 | 1.09  |
| ENSMUSG00000045576 | <i>St7l</i>         | 3.61  | 3.03  | 3.2  | 3.21  |
| ENSMUSG00000045594 | <i>Glb1</i>         | 1.86  | 1.47  | 2.05 | 1.54  |
| ENSMUSG00000045598 | <i>Zfp553</i>       | 1.78  | 2.22  | 1.97 | 2.04  |
| ENSMUSG00000045624 | <i>Esfl</i>         | 3.54  | 2.82  | 2.75 | 2.28  |
| ENSMUSG00000045636 | <i>Mtus1</i>        | 5.68  | 5.43  | 5.47 | 5.17  |
| ENSMUSG00000045639 | <i>mKIAA0326</i>    | 1.8   | 2.03  | 2.15 | 1.73  |
| ENSMUSG00000045658 | <i>5033414K04Ri</i> | 6.21  | 5.87  | 6.02 | 5.51  |

|                    |                     |       |       |       |       |
|--------------------|---------------------|-------|-------|-------|-------|
| ENSMUSG00000045659 | <i>Plekha7</i>      | 0.35  | 1.23  | 1.03  | 0.64  |
| ENSMUSG00000045664 | <i>Cdc42ep2</i>     | 1.28  | 1.79  | 0.53  | 0.75  |
| ENSMUSG00000045665 | <i>D15Mgi27</i>     | 3.59  | 4.63  | 4.26  | 4.08  |
| ENSMUSG00000045671 | <i>Spred-2</i>      | 1.64  | 1.89  | 1.54  | 1.11  |
| ENSMUSG00000045680 | <i>Tcf21</i>        | 1.54  | 2.32  | 2.1   | 1.59  |
| ENSMUSG00000045690 | <i>NA</i>           | 1.62  | 2.3   | 2.09  | 2.65  |
| ENSMUSG00000045691 | <i>Thtpa</i>        | 3.7   | 3.98  | 3.81  | 3.61  |
| ENSMUSG00000045730 | <i>Adrb2</i>        | 0.74  | -0.56 | 1.02  | -0.8  |
| ENSMUSG00000045744 | <i>9930021D14R1</i> | 1.52  | 2.34  | 2.07  | 2     |
| ENSMUSG00000045752 | <i>Tssc4</i>        | 2.73  | 3.73  | 3.29  | 3.2   |
| ENSMUSG00000045767 | <i>B230219D22R1</i> | 4.07  | 3.63  | 3.9   | 3.62  |
| ENSMUSG00000045775 | <i>Slc16a5</i>      | 3.88  | 4.02  | 4.06  | 3.76  |
| ENSMUSG00000045776 | <i>Lrtm1</i>        | 3.6   | 1.75  | 3.24  | 1.39  |
| ENSMUSG00000045795 | <i>Whdc1</i>        | 3.64  | 4.46  | 4.27  | 4     |
| ENSMUSG00000045817 | <i>Zfp36l2</i>      | 4.23  | 3.91  | 4.14  | 3.8   |
| ENSMUSG00000045826 | <i>Ptprcap</i>      | -0.91 | -0.62 | 1.65  | -0.91 |
| ENSMUSG00000045827 | <i>Serpinb9</i>     | 2.42  | 1.86  | 1.51  | 0.67  |
| ENSMUSG00000045854 | <i>Lymr2</i>        | 3.7   | 2.53  | 3.95  | 3.4   |
| ENSMUSG00000045867 | <i>Cradd</i>        | 3.77  | 4.15  | 3.85  | 3.91  |
| ENSMUSG00000045875 | <i>Adra1a</i>       | 0.61  | -0.1  | 1.46  | 1.03  |
| ENSMUSG00000045886 | <i>NA</i>           | 2.69  | 1.57  | 2.95  | 3.78  |
| ENSMUSG00000045896 | <i>Paip2b</i>       | 3.71  | 3.45  | 3.32  | 2.89  |
| ENSMUSG00000045917 | <i>6330416G13R1</i> | 1.22  | 1.16  | 1.01  | 0.68  |
| ENSMUSG00000045930 | <i>Clec14a</i>      | 3.18  | 3.62  | 3.27  | 2.95  |
| ENSMUSG00000045932 | <i>Ifit2</i>        | 1.28  | 0.04  | -0.54 | 0.02  |
| ENSMUSG00000045934 | <i>Mtmr11</i>       | 1.96  | 1.45  | 1.95  | 0.87  |
| ENSMUSG00000045948 | <i>Mrps12</i>       | 4.61  | 4.74  | 4.5   | 4.75  |
| ENSMUSG00000045954 | <i>Sdpr</i>         | 3.6   | 3.14  | 2.85  | 2.79  |
| ENSMUSG00000045962 | <i>Wnk1</i>         | 4.25  | 3.93  | 4.1   | 3.8   |
| ENSMUSG00000045969 | <i>Ingl</i>         | 3.1   | 3.43  | 2.85  | 2.43  |
| ENSMUSG00000045973 | <i>Mcart1</i>       | 4.34  | 3.79  | 4.02  | 4.38  |

|                    |                     |      |       |      |      |
|--------------------|---------------------|------|-------|------|------|
| ENSMUSG00000045975 | <i>5830404H04R</i>  | 5.91 | 5.71  | 5.64 | 5.41 |
| ENSMUSG00000045980 | <i>Tmem104</i>      | 2.21 | 3.02  | 2.66 | 2.55 |
| ENSMUSG00000045983 | <i>Eif4g1</i>       | 6.51 | 6.88  | 6.62 | 6.56 |
| ENSMUSG00000045991 | <i>Onecut2</i>      | 4.51 | 3.62  | 4.1  | 3.62 |
| ENSMUSG00000045996 | <i>Polr2k</i>       | 1.31 | -0.87 | 1.61 | 1.04 |
| ENSMUSG00000045999 | <i>NA</i>           | 6.71 | 7.45  | 7.25 | 7.01 |
| ENSMUSG00000046010 | <i>Ccdc16</i>       | 2.93 | 2.19  | 2.71 | 2.24 |
| ENSMUSG00000046020 | <i>Pofut1</i>       | 2.26 | 2.34  | 1.82 | 1.59 |
| ENSMUSG00000046027 | <i>Stard5</i>       | 4.74 | 4.91  | 5.24 | 4.86 |
| ENSMUSG00000046032 | <i>Snx12</i>        | 3.89 | 3.19  | 3.3  | 3.08 |
| ENSMUSG00000046034 | <i>BC087945</i>     | 5.16 | 5.18  | 5.09 | 4.83 |
| ENSMUSG00000046062 | <i>Ppp1r15b</i>     | 5.12 | 4.9   | 5.27 | 5.17 |
| ENSMUSG00000046070 | <i>Igfals</i>       | 6.33 | 6.86  | 5.73 | 5.97 |
| ENSMUSG00000046079 | <i>Lrrc8d</i>       | 3.97 | 3.45  | 3.81 | 3.28 |
| ENSMUSG00000046085 | <i>NA</i>           | 0.52 | 1.56  | 1.36 | 1.48 |
| ENSMUSG00000046096 | <i>NA</i>           | 2.72 | 1.81  | 1.77 | 1.93 |
| ENSMUSG00000046110 | <i>LOC574418</i>    | 3    | 2.95  | 2.96 | 2.63 |
| ENSMUSG00000046138 | <i>9930021J03Ri</i> | 3.13 | 3.05  | 3.04 | 3.1  |
| ENSMUSG00000046139 | <i>AV312086</i>     | 3.44 | 3.29  | 3.29 | 3.08 |
| ENSMUSG00000046153 | <i>NA</i>           | 3.25 | 1.88  | 2.45 | 3.59 |
| ENSMUSG00000046179 | <i>E2f8</i>         | 2.21 | 2.06  | 1.49 | 1.44 |
| ENSMUSG00000046185 | <i>Zfp84</i>        | 1.66 | 1.29  | 1.41 | 1.49 |
| ENSMUSG00000046201 | <i>NA</i>           | 3.29 | 2.15  | 2.77 | 2.51 |
| ENSMUSG00000046229 | <i>Scand1</i>       | 4.41 | 5.96  | 5.88 | 5.56 |
| ENSMUSG00000046230 | <i>Vps13a</i>       | 1.44 | 0.29  | 1.29 | 0.65 |
| ENSMUSG00000046280 | <i>She</i>          | 1.25 | 0.92  | 0.12 | 0.63 |
| ENSMUSG00000046311 | <i>Zfp62</i>        | 2.53 | 1.94  | 2.28 | 1.79 |
| ENSMUSG00000046312 | <i>AI464131</i>     | 4.32 | 4.69  | 4.54 | 4.55 |
| ENSMUSG00000046314 | <i>Stxbp6</i>       | 2.32 | 1.15  | 1.85 | 1.74 |
| ENSMUSG00000046318 | <i>mKIAA1983</i>    | 1.06 | 0.24  | 0.84 | 0.59 |
| ENSMUSG00000046324 | <i>Ermp1</i>        | 3.06 | 2.78  | 3.11 | 2.51 |

|                    |                     |      |       |      |      |
|--------------------|---------------------|------|-------|------|------|
| ENSMUSG00000046329 | <i>Slc25a23</i>     | 7.42 | 7.48  | 7.41 | 7.44 |
| ENSMUSG00000046330 | <i>Rpl37a</i>       | 2.81 | 2.11  | 2.17 | 2.16 |
| ENSMUSG00000046334 | <i>NA</i>           | 1.53 | -1.46 | 0.61 | 1.24 |
| ENSMUSG00000046351 | <i>Zfp322a</i>      | 2.39 | 1.51  | 1.95 | 1.39 |
| ENSMUSG00000046352 | <i>Gjb2</i>         | 7.28 | 7.3   | 7.6  | 7.57 |
| ENSMUSG00000046364 | <i>Rpl27a</i>       | 2.46 | 2.87  | 2.28 | 1.24 |
| ENSMUSG00000046379 | <i>NA</i>           | 2.6  | 1.1   | 3.39 | 2.06 |
| ENSMUSG00000046402 | <i>Rbp1</i>         | 4.18 | 4.96  | 4.35 | 4.92 |
| ENSMUSG00000046404 | <i>Yod1</i>         | 2.95 | 1.32  | 2.35 | 2.39 |
| ENSMUSG00000046441 | <i>BC025546</i>     | 1.19 | -0.13 | 0.95 | 0.47 |
| ENSMUSG00000046447 | <i>Camk2n1</i>      | 5.9  | 5.35  | 5.95 | 5.55 |
| ENSMUSG00000046470 | <i>Sox18</i>        | 1.74 | 3.1   | 1.39 | 1.46 |
| ENSMUSG00000046516 | <i>Cox17</i>        | 2.51 | 2.53  | 2.84 | 2.71 |
| ENSMUSG00000046519 | <i>Golph3l</i>      | 2.57 | 1.81  | 1.83 | 1.54 |
| ENSMUSG00000046532 | <i>Ar</i>           | 1.45 | 0.42  | 1.22 | 0.52 |
| ENSMUSG00000046546 | <i>BC022623</i>     | 1.16 | 1.81  | 1.38 | 1.26 |
| ENSMUSG00000046556 | <i>Zfp319</i>       | 1.39 | 1.71  | 1.73 | 1.56 |
| ENSMUSG00000046562 | <i>Unc119b</i>      | 3.69 | 4.36  | 3.7  | 3.71 |
| ENSMUSG00000046567 | <i>4930430F08Ri</i> | 2.81 | 1.19  | 2.52 | 1.77 |
| ENSMUSG00000046573 | <i>Lym4</i>         | 4.28 | 3.84  | 4.27 | 3.57 |
| ENSMUSG00000046574 | <i>mKIAA1205</i>    | 1.14 | 2.23  | 1.85 | 1.65 |
| ENSMUSG00000046598 | <i>Bdh1</i>         | 6.98 | 7.22  | 6.9  | 6.8  |
| ENSMUSG00000046603 | <i>D9Ert402e</i>    | 3.33 | 2.81  | 2.96 | 2.55 |
| ENSMUSG00000046605 | <i>B3gnt1l</i>      | 1.11 | 1.56  | 1.08 | 0.76 |
| ENSMUSG00000046635 | <i>NA</i>           | 2.92 | 3.44  | 3.88 | 3.22 |
| ENSMUSG00000046667 | <i>Rbm12b</i>       | 1.58 | 0.64  | 1.99 | 1.29 |
| ENSMUSG00000046668 | <i>Cxxc5</i>        | 5.02 | 5.44  | 5    | 4.62 |
| ENSMUSG00000046671 | <i>2410166I05Ri</i> | 5.36 | 5.82  | 5.57 | 5.19 |
| ENSMUSG00000046675 | <i>D230037D09R</i>  | 1.67 | 1.17  | 1.45 | 1.32 |
| ENSMUSG00000046679 | <i>C87436</i>       | 2.82 | 2.7   | 2.57 | 2.64 |
| ENSMUSG00000046687 | <i>NA</i>           | 7.06 | 6.8   | 7.43 | 7.66 |

|                    |                     |      |      |      |      |
|--------------------|---------------------|------|------|------|------|
| ENSMUSG00000046688 | <i>T2bp</i>         | 2.28 | 1.01 | 3.08 | 2.01 |
| ENSMUSG00000046691 | <i>5830457O10Ra</i> | 4.76 | 4.43 | 4.54 | 4.58 |
| ENSMUSG00000046706 | <i>NA</i>           | 0.66 | 0.37 | 1.1  | 2.09 |
| ENSMUSG00000046707 | <i>Csnk2a2</i>      | 4.1  | 3.68 | 4    | 3.77 |
| ENSMUSG00000046718 | <i>Bst2</i>         | 7.13 | 6.94 | 7.15 | 7.34 |
| ENSMUSG00000046721 | <i>NA</i>           | 0.46 | 0.79 | 1.54 | 0.65 |
| ENSMUSG00000046722 | <i>Cdc42sel</i>     | 3.24 | 3.45 | 3.49 | 3.57 |
| ENSMUSG00000046727 | <i>0610010O12Ra</i> | 2.64 | 2.66 | 3.01 | 2.7  |
| ENSMUSG00000046753 | <i>Ccdc66</i>       | 1.39 | 1.36 | 1.33 | 0.91 |
| ENSMUSG00000046756 | <i>Mrps7</i>        | 5.08 | 5.41 | 5.18 | 5.24 |
| ENSMUSG00000046761 | <i>AA409316</i>     | 2.19 | 2.64 | 2.51 | 2.2  |
| ENSMUSG00000046785 | <i>Epm2aip1</i>     | 2.18 | 1.41 | 1.89 | 1.1  |
| ENSMUSG00000046791 | <i>2410016O06Ra</i> | 2.04 | 2.16 | 1.89 | 1.93 |
| ENSMUSG00000046792 | <i>Zfp787</i>       | 3.13 | 3.74 | 3.28 | 3.41 |
| ENSMUSG00000046794 | <i>Ppp1r3b</i>      | 7    | 7.03 | 6.74 | 6.85 |
| ENSMUSG00000046798 | <i>Cldn12</i>       | 5.24 | 4.36 | 4.89 | 4.41 |
| ENSMUSG00000046805 | <i>Mpeg1</i>        | 4.27 | 3.16 | 3.39 | 3.29 |
| ENSMUSG00000046806 | <i>3110062M04Ra</i> | 2.85 | 2.8  | 2.87 | 2.54 |
| ENSMUSG00000046808 | <i>Atp10d</i>       | 1.95 | 0.59 | 1.82 | 0.58 |
| ENSMUSG00000046811 | <i>C730027E14Ra</i> | 5.64 | 6.5  | 6.1  | 6.02 |
| ENSMUSG00000046814 | <i>Gchfr</i>        | 6.74 | 7.45 | 7.39 | 7.71 |
| ENSMUSG00000046822 | <i>Slc39a3</i>      | 2.2  | 2.81 | 2.19 | 2.05 |
| ENSMUSG00000046840 | <i>NA</i>           | 1.88 | 2.02 | 2.33 | 2.42 |
| ENSMUSG00000046841 | <i>Ckap4</i>        | 1.24 | 0.98 | 0.9  | 0.51 |
| ENSMUSG00000046861 | <i>Hectd3</i>       | 4.17 | 4.39 | 4.56 | 4.13 |
| ENSMUSG00000046862 | <i>4732496O08Ra</i> | 1.76 | 1.68 | 1.27 | 1.12 |
| ENSMUSG00000046865 | <i>Fbl</i>          | 1.01 | 1.36 | 1.6  | 1.86 |
| ENSMUSG00000046873 | <i>Mbtps2</i>       | 1.22 | 0.71 | 1.02 | 0.41 |
| ENSMUSG00000046879 | <i>Irgm</i>         | 5.48 | 4.87 | 4.74 | 4.89 |
| ENSMUSG00000046897 | <i>Znf740</i>       | 3.01 | 2.87 | 2.93 | 2.6  |
| ENSMUSG00000046909 | <i>1110002N22Ra</i> | 3.49 | 3.34 | 3.1  | 2.64 |

|                    |                     |      |       |      |       |
|--------------------|---------------------|------|-------|------|-------|
| ENSMUSG00000046916 | <i>Myct1</i>        | 1.52 | 0.81  | 1.12 | 1.05  |
| ENSMUSG00000046947 | <i>Adck2</i>        | 3.05 | 3.17  | 3.09 | 2.93  |
| ENSMUSG00000046949 | <i>Nqo2</i>         | 6.45 | 5.9   | 6.45 | 6.02  |
| ENSMUSG00000046959 | <i>Slc26a1</i>      | 6.66 | 6.87  | 6.93 | 6.76  |
| ENSMUSG00000046962 | <i>Zfp295</i>       | 1.54 | 1.55  | 1.35 | 1.17  |
| ENSMUSG00000046982 | <i>Tshz1</i>        | 3.14 | 2.87  | 3.24 | 2.84  |
| ENSMUSG00000046985 | <i>Tapt1</i>        | 4.88 | 4.31  | 4.87 | 4.57  |
| ENSMUSG00000047030 | <i>Spata2</i>       | 2.13 | 2.75  | 2.16 | 2.68  |
| ENSMUSG00000047036 | <i>Zfp445</i>       | 3.49 | 2.99  | 3.04 | 2.72  |
| ENSMUSG00000047037 | <i>Nipa1</i>        | 1.64 | 0.93  | 0.51 | 0.19  |
| ENSMUSG00000047044 | <i>D030056L22Ri</i> | 2.05 | 1.18  | 2.35 | 1.29  |
| ENSMUSG00000047045 | <i>Tmem164</i>      | 1.5  | 1.67  | 1.21 | 1.1   |
| ENSMUSG00000047067 | <i>Dusp28</i>       | 2.55 | 2.99  | 2.88 | 2.52  |
| ENSMUSG00000047084 | <i>fi58gm</i>       | 4.46 | 4.2   | 4.32 | 4.2   |
| ENSMUSG00000047090 | <i>I110012D08Ri</i> | 4.37 | 3.87  | 4.04 | 3.66  |
| ENSMUSG00000047098 | <i>Rnf31</i>        | 2.77 | 3.09  | 2.39 | 2.43  |
| ENSMUSG00000047109 | <i>Cldn14</i>       | 2.42 | 3.67  | 1.99 | 3.05  |
| ENSMUSG00000047112 | <i>NA</i>           | 4.42 | 5.42  | 5.16 | 4.94  |
| ENSMUSG00000047123 | <i>Ticam1</i>       | 3.64 | 4.09  | 3.63 | 3.26  |
| ENSMUSG00000047126 | <i>Cltc</i>         | 5.88 | 5.59  | 5.67 | 5.3   |
| ENSMUSG00000047139 | <i>Cd24a</i>        | 0.11 | -0.48 | 2.67 | 0.97  |
| ENSMUSG00000047141 | <i>Zfp654</i>       | 3.48 | 1.9   | 2.8  | 1.89  |
| ENSMUSG00000047150 | <i>I700001C19Ri</i> | 1.96 | 2.24  | 2.3  | 2.31  |
| ENSMUSG00000047153 | <i>9130227C08Ri</i> | 3.18 | 3.58  | 3.03 | 2.57  |
| ENSMUSG00000047166 | <i>Tigd5</i>        | 0.68 | 1.87  | 1.53 | 1.24  |
| ENSMUSG00000047180 | <i>Lincr</i>        | 1.11 | 1.28  | 1.06 | 0.5   |
| ENSMUSG00000047187 | <i>Rab2</i>         | 6.04 | 5.35  | 5.63 | 5.29  |
| ENSMUSG00000047213 | <i>Ythdf3</i>       | 5.04 | 3.78  | 4.57 | 4.12  |
| ENSMUSG00000047221 | <i>A1847670</i>     | 2.07 | 1.83  | 2.06 | 1.51  |
| ENSMUSG00000047228 | <i>BC048546</i>     | 0.79 | -1.87 | 1.32 | -1.21 |
| ENSMUSG00000047230 | <i>Cldn2</i>        | 4.28 | 4.96  | 4.32 | 4.62  |



|                    |                     |      |      |       |      |
|--------------------|---------------------|------|------|-------|------|
| ENSMUSG00000047238 | <i>Mageh1</i>       | 0.47 | 1.11 | 1.45  | 1.37 |
| ENSMUSG00000047248 | <i>AU020772</i>     | 1.93 | 1.69 | 1.95  | 1.75 |
| ENSMUSG00000047250 | <i>Ptgs1</i>        | 3.09 | 2.32 | 2.4   | 1.99 |
| ENSMUSG00000047260 | <i>Tmem93</i>       | 5.54 | 6.06 | 6.13  | 5.99 |
| ENSMUSG00000047264 | <i>Zfp358</i>       | 3.11 | 3.9  | 3.22  | 3.3  |
| ENSMUSG00000047284 | <i>0610025P10Ri</i> | 2.49 | 2.73 | 2.45  | 2.15 |
| ENSMUSG00000047308 | <i>NA</i>           | 0.49 | 1.79 | 1.35  | 1.61 |
| ENSMUSG00000047368 | <i>5730446C15Ri</i> | 3.84 | 2.68 | 3.14  | 2.87 |
| ENSMUSG00000047371 | <i>Zfp768</i>       | 3.82 | 3.81 | 3.64  | 3.62 |
| ENSMUSG00000047379 | <i>B3gnt1</i>       | 3.65 | 4.04 | 3.74  | 3.71 |
| ENSMUSG00000047388 | <i>BC060631</i>     | 2.14 | 2.38 | 2.24  | 1.81 |
| ENSMUSG00000047394 | <i>2010001J22Ri</i> | 1.89 | 2.87 | 2.31  | 1.43 |
| ENSMUSG00000047407 | <i>Tgif1</i>        | 2.9  | 3.21 | 3.09  | 2.49 |
| ENSMUSG00000047409 | <i>Ctdspl</i>       | 1.22 | 1.54 | 1.28  | 1.04 |
| ENSMUSG00000047412 | <i>Zbtb44</i>       | 3.85 | 2.94 | 3.56  | 3.26 |
| ENSMUSG00000047417 | <i>Rexo1</i>        | 2.7  | 3.48 | 2.96  | 2.75 |
| ENSMUSG00000047423 | <i>AI837181</i>     | 4.1  | 4.75 | 4.31  | 3.92 |
| ENSMUSG00000047446 | <i>Arl4a</i>        | 5.08 | 4.58 | 4.38  | 3.76 |
| ENSMUSG00000047454 | <i>Gphn</i>         | 5.44 | 5.38 | 5.61  | 5.25 |
| ENSMUSG00000047459 | <i>Dynlrb1</i>      | 6.88 | 6.85 | 7.21  | 7.17 |
| ENSMUSG00000047466 | <i>8030462N17Ri</i> | 1.78 | 1.61 | 1.49  | 1.74 |
| ENSMUSG00000047492 | <i>Inhbe</i>        | 4.97 | 5.1  | 4.62  | 4.48 |
| ENSMUSG00000047496 | <i>Rnf152</i>       | 1.48 | 0.43 | 1.47  | 0.87 |
| ENSMUSG00000047514 | <i>Tspyl1</i>       | 4.44 | 4.02 | 3.81  | 3.54 |
| ENSMUSG00000047517 | <i>Dmbt1</i>        | 2.2  | 0.33 | -0.62 | 0.62 |
| ENSMUSG00000047539 | <i>Fbxo28</i>       | 2.07 | 1.73 | 1.87  | 1.68 |
| ENSMUSG00000047547 | <i>Cltb</i>         | 4.83 | 5.28 | 4.87  | 4.81 |
| ENSMUSG00000047554 | <i>Tmem41b</i>      | 1.73 | 0.9  | 1.46  | 0.87 |
| ENSMUSG00000047603 | <i>Zfp235</i>       | 0.86 | 0.48 | 1.02  | 0.61 |
| ENSMUSG00000047613 | <i>A430005L14Ri</i> | 4.21 | 4.43 | 4.47  | 4.23 |
| ENSMUSG00000047617 | <i>BC029214</i>     | 4.06 | 4.47 | 3.81  | 3.83 |

|                    |                     |      |      |      |      |
|--------------------|---------------------|------|------|------|------|
| ENSMUSG00000047631 | <i>Apof</i>         | 8.25 | 8.28 | 8.32 | 8.4  |
| ENSMUSG00000047635 | <i>2810006K23Ri</i> | 2.58 | 2.46 | 2.55 | 2.24 |
| ENSMUSG00000047638 | <i>Nr1h4</i>        | 6.24 | 5.64 | 6.19 | 6    |
| ENSMUSG00000047648 | <i>Fbxo30</i>       | 2.68 | 1.98 | 2.29 | 1.83 |
| ENSMUSG00000047649 | <i>Cd3eap</i>       | 1.81 | 2.98 | 1.76 | 2.23 |
| ENSMUSG00000047656 | <i>Trpt1</i>        | 0.99 | 1.66 | 1.28 | 1.16 |
| ENSMUSG00000047675 | <i>LOC10004218</i>  | 5.33 | 4.99 | 4.96 | 4.56 |
| ENSMUSG00000047694 | <i>Yipf6</i>        | 3.94 | 2.68 | 3.52 | 2.83 |
| ENSMUSG00000047710 | <i>D8Ert457e</i>    | 2.03 | 1.94 | 1.92 | 1.53 |
| ENSMUSG00000047714 | <i>Ppp1r2</i>       | 2.04 | 1.36 | 1.77 | 1.47 |
| ENSMUSG00000047719 | <i>Ubiad1</i>       | 4.02 | 4.26 | 3.89 | 3.74 |
| ENSMUSG00000047721 | <i>Bola2</i>        | 3.58 | 4.52 | 4.12 | 4.46 |
| ENSMUSG00000047728 | <i>NA</i>           | 7.21 | 6.9  | 6.83 | 6.57 |
| ENSMUSG00000047731 | <i>D19Wsu162e</i>   | 7.41 | 7.53 | 7.3  | 7.04 |
| ENSMUSG00000047735 | <i>NA</i>           | 2.43 | 1.09 | 1.63 | 1.04 |
| ENSMUSG00000047777 | <i>Phf13</i>        | 1.19 | 1.9  | 1.66 | 1.47 |
| ENSMUSG00000047789 | <i>9130023D20Ri</i> | 1.53 | 1.12 | 1.52 | 1.33 |
| ENSMUSG00000047793 | <i>Sned1</i>        | 0.94 | 1.02 | 1.13 | 0.91 |
| ENSMUSG00000047797 | <i>Gjb1</i>         | 8.72 | 9.38 | 8.71 | 8.72 |
| ENSMUSG00000047804 | <i>Akap10</i>       | 1.63 | 1.43 | 1.64 | 1.27 |
| ENSMUSG00000047822 | <i>EG624219</i>     | 4.2  | 6.17 | 4.3  | 4.54 |
| ENSMUSG00000047824 | <i>Pygo2</i>        | 2.76 | 3.42 | 2.98 | 2.84 |
| ENSMUSG00000047832 | <i>Cdca4</i>        | 1.7  | 1.44 | 1.3  | 1.55 |
| ENSMUSG00000047843 | <i>Bri3</i>         | 3.28 | 4.12 | 4.02 | 3.81 |
| ENSMUSG00000047866 | <i>Lonp2</i>        | 7.02 | 6.84 | 6.89 | 6.52 |
| ENSMUSG00000047867 | <i>Gimap6</i>       | 1.83 | 1.82 | 1.88 | 1.53 |
| ENSMUSG00000047879 | <i>Usp14</i>        | 4.67 | 3.35 | 3.84 | 3.18 |
| ENSMUSG00000047881 | <i>Rell1</i>        | 2.45 | 2.37 | 1.91 | 1.79 |
| ENSMUSG00000047888 | <i>Tnrc6b</i>       | 2.27 | 1.75 | 2.37 | 1.89 |
| ENSMUSG00000047907 | <i>Tshz2</i>        | 2.11 | 1.89 | 1.69 | 1.55 |
| ENSMUSG00000047909 | <i>Ankrd16</i>      | 1.49 | 1.85 | 1.21 | 1.24 |

|                    |                      |      |      |      |      |
|--------------------|----------------------|------|------|------|------|
| ENSMUSG00000047921 | <i>I1810044A24Ri</i> | 2.5  | 2.62 | 2.42 | 2.22 |
| ENSMUSG00000047945 | <i>Marcks11</i>      | 2.16 | 2.9  | 2.53 | 2.51 |
| ENSMUSG00000047963 | <i>Stbd1</i>         | 4.31 | 5.55 | 4.68 | 5.28 |
| ENSMUSG00000047989 | <i>D030070L09R</i>   | 2.92 | 3.28 | 3    | 2.79 |
| ENSMUSG00000048000 | <i>Tnrc15</i>        | 3.39 | 3.35 | 3.21 | 2.97 |
| ENSMUSG00000048007 | <i>Timm8a1</i>       | 1.92 | 1.27 | 2.04 | 1.12 |
| ENSMUSG00000048039 | <i>Isg20l2</i>       | 3.48 | 3.27 | 2.91 | 3.29 |
| ENSMUSG00000048047 | <i>Zbtb33</i>        | 2.9  | 1.9  | 2.19 | 1.79 |
| ENSMUSG00000048058 | <i>Ldlrad3</i>       | 2.25 | 2.04 | 2.98 | 2.64 |
| ENSMUSG00000048076 | <i>Arf1</i>          | 6.32 | 5.9  | 6.05 | 5.91 |
| ENSMUSG00000048087 | <i>NA</i>            | 2.35 | 1.9  | 1.29 | 2.66 |
| ENSMUSG00000048100 | <i>Taf13</i>         | 3.04 | 2.38 | 2.91 | 2.45 |
| ENSMUSG00000048106 | <i>NA</i>            | 1.95 | 1    | 0.96 | 0.89 |
| ENSMUSG00000048109 | <i>Rbm15</i>         | 2.58 | 2.24 | 2.24 | 2.3  |
| ENSMUSG00000048118 | <i>Arid4a</i>        | 2.68 | 2.36 | 2.5  | 2.29 |
| ENSMUSG00000048120 | <i>Entpd1</i>        | 2.18 | 1.95 | 1.4  | 1.23 |
| ENSMUSG00000048149 | <i>NA</i>            | 2.3  | 1.73 | 1.96 | 2.37 |
| ENSMUSG00000048154 | <i>NA</i>            | 1.6  | 2.21 | 1.74 | 1.72 |
| ENSMUSG00000048163 | <i>Selpl</i>         | 0.61 | 0.69 | 1.11 | 0.18 |
| ENSMUSG00000048164 | <i>NA</i>            | 1.71 | 1.6  | 2.05 | 2.35 |
| ENSMUSG00000048170 | <i>I1110007A13Ri</i> | 3.99 | 3.96 | 4.07 | 3.83 |
| ENSMUSG00000048175 | <i>Asb8</i>          | 3.81 | 4.46 | 3.97 | 3.87 |
| ENSMUSG00000048186 | <i>E130319B15R</i>   | 1.71 | 1.67 | 1.69 | 1.67 |
| ENSMUSG00000048217 | <i>Nags</i>          | 5.36 | 6.25 | 5.53 | 5.42 |
| ENSMUSG00000048218 | <i>Amigo2</i>        | 3.39 | 2.51 | 3.22 | 2.51 |
| ENSMUSG00000048222 | <i>Mfap1b</i>        | 1.45 | 0.34 | 1.08 | 0.9  |
| ENSMUSG00000048234 | <i>AK040602</i>      | 6.41 | 5.73 | 5.93 | 5.32 |
| ENSMUSG00000048249 | <i>A930001N09R</i>   | 2.83 | 1.45 | 2.26 | 1.66 |
| ENSMUSG00000048264 | <i>Dip2c</i>         | 1.68 | 1.24 | 1.76 | 1.46 |
| ENSMUSG00000048271 | <i>Prr8</i>          | 2.93 | 2.45 | 2.7  | 2.36 |
| ENSMUSG00000048277 | <i>Clast2</i>        | 5.32 | 6.25 | 5.81 | 5.82 |

|                    |                     |       |       |       |       |
|--------------------|---------------------|-------|-------|-------|-------|
| ENSMUSG00000048307 | <i>Ankrd46</i>      | 4.49  | 4.42  | 4.6   | 4.32  |
| ENSMUSG00000048310 | <i>Pskhl</i>        | 3.99  | 4.36  | 4.12  | 4.07  |
| ENSMUSG00000048316 | <i>NA</i>           | 3.77  | 4.42  | 3.67  | 3.76  |
| ENSMUSG00000048332 | <i>Lhfp</i>         | 2.06  | 2.2   | 1.87  | 1.87  |
| ENSMUSG00000048351 | <i>2010305A19Ri</i> | 3.99  | 4.15  | 4.35  | 4.37  |
| ENSMUSG00000048365 | <i>NA</i>           | 3.15  | 3.31  | 3.17  | 2.9   |
| ENSMUSG00000048371 | <i>4833426J09Ri</i> | 3.6   | 3.16  | 2.92  | 2.62  |
| ENSMUSG00000048376 | <i>F2r</i>          | 3.14  | 2.72  | 2.63  | 2.38  |
| ENSMUSG00000048379 | <i>Socs4</i>        | 2.76  | 1.77  | 2.28  | 1.93  |
| ENSMUSG00000048429 | <i>1810026J23Ri</i> | 4.79  | 4.81  | 4.64  | 4.42  |
| ENSMUSG00000048439 | <i>Nupl2</i>        | 1.5   | 1.39  | 1.37  | 0.6   |
| ENSMUSG00000048486 | <i>D930001I22Ri</i> | 4.56  | 4.74  | 4.76  | 4.52  |
| ENSMUSG00000048489 | <i>8430408G22Ri</i> | 5.62  | 5.95  | 6.4   | 6.1   |
| ENSMUSG00000048490 | <i>Nrip1</i>        | 1.92  | 1.35  | 1.93  | 1.4   |
| ENSMUSG00000048495 | <i>1110034B05Ri</i> | 2.37  | 1.34  | 2.11  | 0.89  |
| ENSMUSG00000048498 | <i>Cd300e</i>       | 1.36  | 0.19  | -0.89 | -0.05 |
| ENSMUSG00000048546 | <i>Tob2</i>         | 4.77  | 5.01  | 4.94  | 4.93  |
| ENSMUSG00000048550 | <i>Thnsl1</i>       | 0.67  | 0.19  | 1.26  | 0.15  |
| ENSMUSG00000048578 | <i>2410014A08Ri</i> | 5.3   | 5.72  | 4.69  | 4.82  |
| ENSMUSG00000048581 | <i>E130311K13Ri</i> | 2.3   | 1.76  | 2.11  | 1.74  |
| ENSMUSG00000048647 | <i>Exdl1</i>        | 1.49  | -0.48 | 0.99  | -1.03 |
| ENSMUSG00000048661 | <i>Lemd3</i>        | 1.93  | 1.1   | 1.43  | 1.19  |
| ENSMUSG00000048668 | <i>5930416I19Ri</i> | 1.65  | 2.05  | 1.64  | 1.4   |
| ENSMUSG00000048701 | <i>NA</i>           | 2.91  | 3.02  | 3.01  | 2.89  |
| ENSMUSG00000048706 | <i>D4Bwg0951e</i>   | 5.83  | 5.59  | 5.87  | 5.9   |
| ENSMUSG00000048720 | <i>Tbc1d12</i>      | 2.34  | 0.81  | 1.75  | 1.1   |
| ENSMUSG00000048731 | <i>Ggnbp1</i>       | 1.96  | 2.3   | 2.3   | 2.37  |
| ENSMUSG00000048755 | <i>Mcat</i>         | 3.79  | 4.27  | 4.05  | 3.75  |
| ENSMUSG00000048756 | <i>Foxo3a</i>       | 3.52  | 3.39  | 3.79  | 3.49  |
| ENSMUSG00000048758 | <i>Rpl29</i>        | -1.29 | -2.65 | 1.88  | -1.15 |
| ENSMUSG00000048769 | <i>Hlf0</i>         | 6.03  | 6.83  | 6.7   | 6.6   |

|                    |                   |      |       |       |       |
|--------------------|-------------------|------|-------|-------|-------|
| ENSMUSG00000048772 | <i>Tmem53</i>     | 4.17 | 4.79  | 4.21  | 4.36  |
| ENSMUSG00000048782 | <i>Insc</i>       | 2.74 | 3.78  | 2.31  | 2.31  |
| ENSMUSG00000048787 | <i>Dcun1d3</i>    | 2.9  | 1.79  | 2.05  | 2.07  |
| ENSMUSG00000048796 | <i>Cyb561d1</i>   | 1.07 | 1.49  | 0.98  | 0.78  |
| ENSMUSG00000048799 | <i>Ccdc100</i>    | 2.62 | 2.5   | 2.7   | 2.14  |
| ENSMUSG00000048826 | <i>Dact2</i>      | 2.52 | 3.67  | 2.7   | 2.35  |
| ENSMUSG00000048832 | <i>Vps37c</i>     | 2.74 | 3.47  | 2.82  | 2.8   |
| ENSMUSG00000048833 | NA                | 4.67 | 4.49  | 4.21  | 3.98  |
| ENSMUSG00000048856 | <i>Ail32487</i>   | 8.29 | 8.48  | 8.91  | 8.63  |
| ENSMUSG00000048874 | <i>Phf3</i>       | 3.85 | 3.38  | 3.67  | 3.57  |
| ENSMUSG00000048878 | <i>Hexim1</i>     | 4.27 | 4.45  | 4.22  | 4.09  |
| ENSMUSG00000048897 | <i>Zfp710</i>     | 1.8  | 2.47  | 2.19  | 2.12  |
| ENSMUSG00000048910 | NA                | 1.78 | 2.42  | 2.02  | 1.98  |
| ENSMUSG00000048911 | <i>Rnf24</i>      | 1.34 | 0.72  | 1.07  | 0.9   |
| ENSMUSG00000048916 | NA                | 2.96 | 2.51  | 2.88  | 3.64  |
| ENSMUSG00000048920 | <i>Fkrp</i>       | 2.78 | 2.95  | 2.54  | 2.2   |
| ENSMUSG00000048924 | <i>Ccdc125</i>    | 1.66 | 1.46  | 1.31  | 1.13  |
| ENSMUSG00000048930 | <i>Tada3l</i>     | 1.6  | 2.56  | 2.22  | 2.06  |
| ENSMUSG00000048949 | NA                | 1.26 | 0.24  | -0.07 | 0.99  |
| ENSMUSG00000048970 | <i>Clgalt1c1</i>  | 4.45 | 3.31  | 4.3   | 4.1   |
| ENSMUSG00000049037 | <i>Clec4a1</i>    | 1.36 | 0.44  | 1.15  | 0.53  |
| ENSMUSG00000049038 | <i>Mterfd3</i>    | 1.67 | -0.09 | 1.46  | -0.21 |
| ENSMUSG00000049044 | <i>cAMP-GEFII</i> | 6.22 | 5.83  | 5.31  | 5.32  |
| ENSMUSG00000049076 | <i>Centb2</i>     | 3.05 | 2.41  | 2.73  | 2.23  |
| ENSMUSG00000049086 | <i>Bmyc</i>       | 0.68 | 2.04  | 2.06  | 1.79  |
| ENSMUSG00000049090 | <i>Zadh2</i>      | 5.72 | 5.25  | 5.45  | 5.07  |
| ENSMUSG00000049091 | <i>Sephs2</i>     | 9.22 | 9.36  | 9.15  | 8.92  |
| ENSMUSG00000049106 | <i>Wdr22</i>      | 3.44 | 3.54  | 3.2   | 3.25  |
| ENSMUSG00000049115 | <i>Agtr1a</i>     | 6.75 | 6.34  | 6.44  | 6.01  |
| ENSMUSG00000049124 | NA                | 1.05 | -0.63 | 2.36  | 2.83  |
| ENSMUSG00000049152 | <i>Ugt3a2</i>     | 8.12 | 7.66  | 7.73  | 7.48  |

|                    |                     |      |      |       |      |
|--------------------|---------------------|------|------|-------|------|
| ENSMUSG00000049164 | <i>Zfp518</i>       | 2.01 | 0.47 | 1.09  | 0.35 |
| ENSMUSG00000049232 | <i>Tigd2</i>        | 3.24 | 1.89 | 2.8   | 2.08 |
| ENSMUSG00000049246 | <i>NA</i>           | 1.88 | 2.15 | 2.3   | 2.93 |
| ENSMUSG00000049266 | <i>NA</i>           | 3.78 | 2.89 | 3.61  | 2.76 |
| ENSMUSG00000049287 | <i>A230051G13R</i>  | 2.39 | 2.89 | 2.35  | 2.12 |
| ENSMUSG00000049288 | <i>NA</i>           | 1.32 | 0.65 | -0.14 | 0.43 |
| ENSMUSG00000049295 | <i>Zfp219</i>       | 2.5  | 3.48 | 2.59  | 3    |
| ENSMUSG00000049299 | <i>Trappc1</i>      | 5.39 | 4.99 | 5.35  | 5.09 |
| ENSMUSG00000049300 | <i>Prmt6</i>        | 1.46 | 1.28 | 0.86  | 0.83 |
| ENSMUSG00000049305 | <i>Ccdc71</i>       | 3.36 | 3.98 | 3.25  | 3.22 |
| ENSMUSG00000049313 | <i>Sorl1</i>        | 1.23 | 1.61 | 1.77  | 1.17 |
| ENSMUSG00000049321 | <i>Zfp2</i>         | 1.32 | 0.89 | 1.06  | 0.87 |
| ENSMUSG00000049323 | <i>Smcr8</i>        | 2.81 | 2.65 | 2.55  | 2.37 |
| ENSMUSG00000049327 | <i>Setd8</i>        | 3.67 | 3.46 | 3.78  | 3.25 |
| ENSMUSG00000049329 | <i>NA</i>           | 4.15 | 3.25 | 3.73  | 3.85 |
| ENSMUSG00000049339 | <i>BC038286</i>     | 6.7  | 7.06 | 6.69  | 6.59 |
| ENSMUSG00000049354 | <i>Wdr68</i>        | 2.78 | 3.41 | 3.06  | 3.26 |
| ENSMUSG00000049382 | <i>Krt8</i>         | 4.57 | 5.19 | 4.66  | 4.2  |
| ENSMUSG00000049396 | <i>Gemin4</i>       | 1.94 | 2.2  | 2.03  | 1.86 |
| ENSMUSG00000049401 | <i>Ogfr</i>         | 4.15 | 4.56 | 4.24  | 4.45 |
| ENSMUSG00000049404 | <i>NA</i>           | 5.44 | 5.44 | 4.86  | 5.13 |
| ENSMUSG00000049421 | <i>Zfp260</i>       | 3.76 | 2.87 | 3.09  | 2.77 |
| ENSMUSG00000049422 | <i>Ndg2</i>         | 8.79 | 9.23 | 9.04  | 8.98 |
| ENSMUSG00000049439 | <i>Cyp20a1</i>      | 3.2  | 3.18 | 3.2   | 2.71 |
| ENSMUSG00000049470 | <i>Aff4</i>         | 4    | 3.33 | 3.64  | 3.26 |
| ENSMUSG00000049477 | <i>NA</i>           | 2.49 | 2.14 | 2.18  | 3.26 |
| ENSMUSG00000049482 | <i>2310061F22Ri</i> | 1.22 | 2.43 | 1.59  | 1.59 |
| ENSMUSG00000049489 | <i>1810009O10Ri</i> | 2.87 | 2.9  | 2.95  | 2.37 |
| ENSMUSG00000049494 | <i>NA</i>           | 2.78 | 1.21 | 1.91  | 2.65 |
| ENSMUSG00000049502 | <i>Dtx3l</i>        | 4.49 | 3.31 | 4.11  | 3.82 |
| ENSMUSG00000049504 | <i>2810046L04Ri</i> | 1.81 | 1.88 | 1.93  | 1.49 |

|                    |                     |       |       |      |       |
|--------------------|---------------------|-------|-------|------|-------|
| ENSMUSG00000049516 | <i>Spty2d1</i>      | 2.67  | 2.45  | 2.2  | 2.49  |
| ENSMUSG00000049521 | <i>Cdc42ep1</i>     | 3.72  | 5.45  | 4.2  | 4.62  |
| ENSMUSG00000049550 | <i>Clip50</i>       | 3.79  | 3.12  | 3.45 | 3.11  |
| ENSMUSG00000049553 | <i>Rpo1-4</i>       | 2.35  | 2.84  | 2.28 | 2.21  |
| ENSMUSG00000049555 | <i>Tmie</i>         | 3.31  | 3.14  | 3.6  | 2.65  |
| ENSMUSG00000049577 | <i>Zfpm1</i>        | 3.81  | 5.06  | 4.58 | 4.75  |
| ENSMUSG00000049580 | <i>Tsku</i>         | 4.82  | 5.63  | 4.88 | 5.89  |
| ENSMUSG00000049600 | <i>Zbtb45</i>       | 1.1   | 1.98  | 1.26 | 1.02  |
| ENSMUSG00000049606 | <i>Zfp644</i>       | 2.31  | 1.35  | 2.07 | 1.35  |
| ENSMUSG00000049624 | <i>Slc17a5</i>      | 4.03  | 3.44  | 3.79 | 3.47  |
| ENSMUSG00000049630 | <i>C1ql3</i>        | 1.63  | 0.34  | 1.32 | 0.49  |
| ENSMUSG00000049643 | <i>2310022A10Ri</i> | 1.73  | 1.84  | 1.69 | 1.61  |
| ENSMUSG00000049647 | <i>Purb</i>         | 3.82  | 2.63  | 3.24 | 2.55  |
| ENSMUSG00000049657 | <i>Zbtb5</i>        | 1.54  | 1.92  | 1.26 | 1.05  |
| ENSMUSG00000049658 | <i>Bdp1</i>         | 2.41  | 1.28  | 1.89 | 1.61  |
| ENSMUSG00000049659 | <i>Aftph</i>        | 4.39  | 3.87  | 4.1  | 3.87  |
| ENSMUSG00000049672 | <i>Zfp161</i>       | 0.98  | 1.13  | 1    | 0.82  |
| ENSMUSG00000049680 | <i>2010005J08Ri</i> | 2.94  | 3.48  | 2.92 | 2.96  |
| ENSMUSG00000049685 | <i>Cyp2g1</i>       | 2.16  | 0.71  | 0.06 | -0.27 |
| ENSMUSG00000049686 | <i>Orai1</i>        | 3.58  | 4.52  | 3.98 | 3.97  |
| ENSMUSG00000049717 | <i>Lig4</i>         | 1.09  | 0.34  | 0.47 | 0.18  |
| ENSMUSG00000049734 | <i>Trex1</i>        | 2.1   | 2.43  | 2.14 | 2.21  |
| ENSMUSG00000049739 | <i>Zfp646</i>       | 1.98  | 2.33  | 1.98 | 2.27  |
| ENSMUSG00000049742 | <i>NA</i>           | -0.94 | -1.18 | 1.11 | 0.58  |
| ENSMUSG00000049751 | <i>Rpl36al</i>      | 4.28  | 4.16  | 4.26 | 4.5   |
| ENSMUSG00000049755 | <i>Zfp672</i>       | 2.69  | 2.79  | 2.65 | 2.44  |
| ENSMUSG00000049760 | <i>2410015M20R</i>  | 6.73  | 6.72  | 6.98 | 6.99  |
| ENSMUSG00000049764 | <i>Zfp280b</i>      | 1.4   | 1.63  | 1.4  | 1.41  |
| ENSMUSG00000049775 | <i>Tmsb4x</i>       | 6     | 5.61  | 6.04 | 5.47  |
| ENSMUSG00000049791 | <i>Fzd4</i>         | 2.76  | 2.42  | 2.79 | 2.27  |
| ENSMUSG00000049792 | <i>Bag5</i>         | 3.32  | 3.35  | 3    | 3.22  |

|                    |                     |      |      |      |      |
|--------------------|---------------------|------|------|------|------|
| ENSMUSG00000049800 | <i>Sertad2</i>      | 2.78 | 2.07 | 2.74 | 2.44 |
| ENSMUSG00000049804 | <i>NA</i>           | 1.78 | 0.87 | 0.73 | 0.3  |
| ENSMUSG00000049807 | <i>Arhgap23</i>     | 1.98 | 2.73 | 1.99 | 1.7  |
| ENSMUSG00000049832 | <i>NA</i>           | 3.75 | 4.01 | 3.81 | 4.57 |
| ENSMUSG00000049858 | <i>Suox</i>         | 7.13 | 6.93 | 7    | 6.48 |
| ENSMUSG00000049878 | <i>Rlf</i>          | 2.32 | 1.13 | 1.77 | 1.48 |
| ENSMUSG00000049881 | <i>NA</i>           | 1.72 | 1.65 | 1.67 | 1.94 |
| ENSMUSG00000049882 | <i>Gm71</i>         | 3.46 | 3.18 | 3.1  | 2.34 |
| ENSMUSG00000049883 | <i>NA</i>           | 2.9  | 4.11 | 3.82 | 4.19 |
| ENSMUSG00000049922 | <i>Slc35c1</i>      | 3.49 | 3.76 | 3.35 | 3.28 |
| ENSMUSG00000049932 | <i>H2afx</i>        | 2.76 | 3.09 | 2.79 | 2.83 |
| ENSMUSG00000049940 | <i>NA</i>           | 5.03 | 5.09 | 4.76 | 4.53 |
| ENSMUSG00000049950 | <i>Rpp38</i>        | 1.6  | 2.09 | 1.94 | 1.56 |
| ENSMUSG00000049957 | <i>Ccdc137</i>      | 1.68 | 2.12 | 1.61 | 1.55 |
| ENSMUSG00000049960 | <i>Mrps16</i>       | 4.62 | 5.31 | 5.25 | 5.24 |
| ENSMUSG00000049969 | <i>Plekhf2</i>      | 3.25 | 2.33 | 2.92 | 2.38 |
| ENSMUSG00000049971 | <i>Glt1d1</i>       | 4.18 | 3.64 | 4.05 | 3.72 |
| ENSMUSG00000049988 | <i>Lrrc25</i>       | 0.96 | 1.31 | 1.11 | 0.41 |
| ENSMUSG00000049992 | <i>NA</i>           | 0.89 | 0.39 | 1.46 | 0.49 |
| ENSMUSG00000050002 | <i>5133401N09Ri</i> | 4.22 | 4    | 4.01 | 4.05 |
| ENSMUSG00000050017 | <i>Pitpnb</i>       | 5.77 | 5.43 | 5.41 | 5.19 |
| ENSMUSG00000050029 | <i>Rap2c</i>        | 4.43 | 3.55 | 3.87 | 3.3  |
| ENSMUSG00000050043 | <i>Txndc14</i>      | 3.53 | 2.95 | 3.38 | 3.04 |
| ENSMUSG00000050052 | <i>2610019F03Ri</i> | 1.84 | 1.95 | 2.04 | 1.99 |
| ENSMUSG00000050069 | <i>Grem2</i>        | 1.92 | 1.1  | 2.24 | 2.34 |
| ENSMUSG00000050077 | <i>NA</i>           | 1.55 | 1.05 | 1.37 | 1.41 |
| ENSMUSG00000050079 | <i>Rspry1</i>       | 2.46 | 2.34 | 2.42 | 1.95 |
| ENSMUSG00000050088 | <i>1600012H06Ri</i> | 4.65 | 3.57 | 4.07 | 3.42 |
| ENSMUSG00000050103 | <i>A530016O06Ri</i> | 6.34 | 5.03 | 5.47 | 5.22 |
| ENSMUSG00000050144 | <i>Slc25a44</i>     | 5.88 | 5.98 | 5.66 | 5.47 |
| ENSMUSG00000050148 | <i>Ubqln2</i>       | 3.22 | 3.5  | 3.34 | 3.18 |



|                    |                     |       |       |       |       |
|--------------------|---------------------|-------|-------|-------|-------|
| ENSMUSG00000050157 | <i>Gm867</i>        | 3.82  | 2.73  | 3.02  | 3.49  |
| ENSMUSG00000050174 | <i>Nudt6</i>        | 2.56  | 3.23  | 2.87  | 2.88  |
| ENSMUSG00000050188 | <i>Lsm10</i>        | 3.9   | 3.87  | 4.06  | 3.6   |
| ENSMUSG00000050199 | <i>Lgr4</i>         | 4.48  | 3.88  | 4.32  | 3.99  |
| ENSMUSG00000050213 | <i>Snip1</i>        | 2.72  | 3.02  | 2.79  | 2.52  |
| ENSMUSG00000050229 | <i>Pigm</i>         | 1.46  | 1.25  | 1.02  | 0.73  |
| ENSMUSG00000050234 | <i>Gja4</i>         | 1.28  | 2.39  | 1.82  | 1.71  |
| ENSMUSG00000050244 | <i>Heatr1</i>       | 1.97  | 2.48  | 1.95  | 1.68  |
| ENSMUSG00000050270 | <i>A730055C05Ri</i> | 3.5   | 3.39  | 3.75  | 3.22  |
| ENSMUSG00000050299 | <i>NA</i>           | 4.06  | 3.85  | 3.8   | 4.48  |
| ENSMUSG00000050310 | <i>4921505C17Ri</i> | 2.07  | 1.27  | 1.85  | 1.24  |
| ENSMUSG00000050312 | <i>Nsun3</i>        | 2.87  | 1.84  | 2.53  | 2.08  |
| ENSMUSG00000050323 | <i>2310030N02Ri</i> | 4.03  | 3.43  | 3.96  | 3.65  |
| ENSMUSG00000050324 | <i>NA</i>           | 2.5   | 2.09  | 2.54  | 1.95  |
| ENSMUSG00000050335 | <i>Lgals3</i>       | 2.2   | 2.23  | 2.23  | 2.34  |
| ENSMUSG00000050347 | <i>NA</i>           | 1.75  | 0.45  | 2.75  | 3.57  |
| ENSMUSG00000050373 | <i>5730407K14Ri</i> | 2.84  | 3.16  | 3.31  | 2.72  |
| ENSMUSG00000050390 | <i>C77080</i>       | 4.58  | 5.07  | 5.26  | 5.1   |
| ENSMUSG00000050428 | <i>Fbxo46</i>       | 1.12  | 1.6   | 1.76  | 1.69  |
| ENSMUSG00000050440 | <i>Hamp1</i>        | 11.04 | 10.58 | 11.21 | 11.34 |
| ENSMUSG00000050445 | <i>Cyp8b1</i>       | 7.59  | 7.81  | 7.82  | 7.48  |
| ENSMUSG00000050471 | <i>Ppp4r1l</i>      | 2.07  | 2.18  | 2.06  | 2.32  |
| ENSMUSG00000050493 | <i>BC030183</i>     | 2.5   | 3.69  | 2.78  | 3.27  |
| ENSMUSG00000050530 | <i>9630050M13Ri</i> | 1.24  | 1.58  | 0.91  | 0.58  |
| ENSMUSG00000050541 | <i>Adra1b</i>       | 4.39  | 4.73  | 4.14  | 3.83  |
| ENSMUSG00000050549 | <i>5730508B09Ri</i> | 1.97  | 1.21  | 1.94  | 0.22  |
| ENSMUSG00000050550 | <i>NA</i>           | 3.14  | 2.65  | 1.75  | 2.25  |
| ENSMUSG00000050552 | <i>0910001L09Ri</i> | 5.76  | 6.01  | 5.98  | 5.83  |
| ENSMUSG00000050565 | <i>Tor1aip2</i>     | 5     | 4.24  | 4.56  | 4.4   |
| ENSMUSG00000050567 | <i>Maml1</i>        | 2.63  | 2.84  | 2.68  | 2.58  |
| ENSMUSG00000050608 | <i>NA</i>           | 6.46  | 6.39  | 6.6   | 6.5   |

|                    |                     |      |      |      |      |
|--------------------|---------------------|------|------|------|------|
| ENSMUSG00000050619 | <i>NA</i>           | 2.27 | 1.67 | 2.08 | 1.64 |
| ENSMUSG00000050627 | <i>Gpd1l</i>        | 4.07 | 3.81 | 3.8  | 3.81 |
| ENSMUSG00000050663 | <i>Trhde</i>        | 2.08 | 1.16 | 1.87 | 1.52 |
| ENSMUSG00000050668 | <i>2310002B06Ri</i> | 3.29 | 2.41 | 2.8  | 2.36 |
| ENSMUSG00000050697 | <i>Prkaa1</i>       | 3.07 | 1.81 | 2.58 | 2.22 |
| ENSMUSG00000050705 | <i>NA</i>           | 4.48 | 4.61 | 5.1  | 4.78 |
| ENSMUSG00000050708 | <i>Ftl1</i>         | 8.09 | 8.15 | 8.51 | 8.7  |
| ENSMUSG00000050721 | <i>Plekhq1</i>      | 1.63 | 2.14 | 1.87 | 1.64 |
| ENSMUSG00000050730 | <i>NA</i>           | 4.12 | 3.73 | 4.01 | 3.85 |
| ENSMUSG00000050732 | <i>Vamp8</i>        | 6.69 | 7.26 | 7.02 | 7    |
| ENSMUSG00000050777 | <i>Tmem37</i>       | 5.44 | 6.48 | 5.87 | 5.64 |
| ENSMUSG00000050812 | <i>AI314180</i>     | 4.69 | 4.37 | 4.58 | 4.36 |
| ENSMUSG00000050846 | <i>Zfp623</i>       | 3.31 | 3.17 | 2.98 | 3.26 |
| ENSMUSG00000050854 | <i>Tmem125</i>      | 1.91 | 2.19 | 2.13 | 1.74 |
| ENSMUSG00000050856 | <i>Atp5k</i>        | 4.91 | 3.67 | 4.41 | 4.64 |
| ENSMUSG00000050860 | <i>Phosphol</i>     | 2.93 | 3.63 | 2.26 | 2.82 |
| ENSMUSG00000050890 | <i>Pdik1l</i>       | 2.63 | 1.8  | 2.24 | 1.73 |
| ENSMUSG00000050891 | <i>Tatdn1</i>       | 2.89 | 1.6  | 2.69 | 1.93 |
| ENSMUSG00000050904 | <i>NA</i>           | 2.85 | 2.81 | 2.88 | 3.49 |
| ENSMUSG00000050908 | <i>BC068110</i>     | 1.74 | 2.08 | 1.5  | 1.36 |
| ENSMUSG00000050912 | <i>Tmem123</i>      | 4.28 | 3.97 | 4.4  | 3.86 |
| ENSMUSG00000050931 | <i>Sgms2</i>        | 3.75 | 3.3  | 3.94 | 3.71 |
| ENSMUSG00000050947 | <i>Amigo1</i>       | 1.96 | 2.23 | 2.04 | 2.2  |
| ENSMUSG00000050951 | <i>NA</i>           | 0.24 | 1.6  | 1.87 | 1.59 |
| ENSMUSG00000050953 | <i>Gjal</i>         | 1.98 | 1.3  | 1.94 | 1.76 |
| ENSMUSG00000050965 | <i>Prkca</i>        | 2.18 | 1.59 | 2.02 | 1.6  |
| ENSMUSG00000050989 | <i>Sepn1</i>        | 1.16 | 1.71 | 1.25 | 1.37 |
| ENSMUSG00000051000 | <i>9930021J17Ri</i> | 0.74 | 0.84 | 1.79 | 0.62 |
| ENSMUSG00000051007 | <i>Pddc1</i>        | 3.97 | 3.61 | 3.9  | 3.58 |
| ENSMUSG00000051041 | <i>Olfml1</i>       | 2.88 | 2.24 | 1.88 | 2.33 |
| ENSMUSG00000051043 | <i>Gprc5c</i>       | 5.27 | 5.34 | 5.3  | 5.1  |

|                    |                     |      |       |      |       |
|--------------------|---------------------|------|-------|------|-------|
| ENSMUSG00000051065 | <i>I600021P15Ri</i> | 3.92 | 3.18  | 3.79 | 3.01  |
| ENSMUSG00000051076 | <i>Vtcn1</i>        | 1.1  | -1.46 | 0.56 | -2.71 |
| ENSMUSG00000051082 | <i>NA</i>           | 2.46 | 3.31  | 2.88 | 2.77  |
| ENSMUSG00000051098 | <i>2900024O10Ri</i> | 1.78 | 0.32  | 1.74 | 1.11  |
| ENSMUSG00000051124 | <i>Gimap9</i>       | 3.77 | 3.33  | 2.91 | 2.53  |
| ENSMUSG00000051133 | <i>NA</i>           | 2.73 | 3.58  | 1.96 | 2.81  |
| ENSMUSG00000051147 | <i>Nat2</i>         | 4.19 | 3.13  | 3.74 | 3.23  |
| ENSMUSG00000051149 | <i>Adnp</i>         | 4.39 | 3.78  | 4.18 | 3.7   |
| ENSMUSG00000051154 | <i>Commd3</i>       | 6.29 | 5.82  | 5.67 | 5.67  |
| ENSMUSG00000051166 | <i>Eml5</i>         | 1.27 | 0.22  | 0.86 | 0.63  |
| ENSMUSG00000051169 | <i>NA</i>           | 2.99 | 4.26  | 3.82 | 3.69  |
| ENSMUSG00000051177 | <i>Plcb1</i>        | 1.66 | 0.82  | 1.68 | 1.16  |
| ENSMUSG00000051184 | <i>Zfp524</i>       | 3.32 | 3.89  | 3.93 | 3.92  |
| ENSMUSG00000051185 | <i>Tmem157</i>      | 3    | 2.34  | 2.87 | 2.37  |
| ENSMUSG00000051186 | <i>NA</i>           | 3    | 3.39  | 3.81 | 3.32  |
| ENSMUSG00000051223 | <i>Bzw1</i>         | 5.55 | 5.26  | 5.25 | 4.74  |
| ENSMUSG00000051226 | <i>NA</i>           | 8.37 | 7.25  | 7.87 | 6.93  |
| ENSMUSG00000051232 | <i>AI316787</i>     | 3.11 | 2.66  | 3.36 | 2.81  |
| ENSMUSG00000051234 | <i>Rnf7</i>         | 3.84 | 2.42  | 3.11 | 2.7   |
| ENSMUSG00000051236 | <i>Msr3</i>         | 2.59 | 2.11  | 2.06 | 2.08  |
| ENSMUSG00000051238 | <i>NA</i>           | 1.57 | 2.05  | 1.49 | 1.33  |
| ENSMUSG00000051255 | <i>NA</i>           | 2.47 | 2.59  | 2.01 | 1.57  |
| ENSMUSG00000051256 | <i>Jagn1</i>        | 4.64 | 5.06  | 4.61 | 4.66  |
| ENSMUSG00000051285 | <i>Pcmd1</i>        | 5.46 | 4.09  | 5.1  | 4.36  |
| ENSMUSG00000051306 | <i>Usp42</i>        | 1.55 | 1.65  | 1.24 | 1.04  |
| ENSMUSG00000051316 | <i>Taf7</i>         | 2.71 | 1.84  | 2.37 | 1.85  |
| ENSMUSG00000051319 | <i>NA</i>           | 4.99 | 4.63  | 5.48 | 5.19  |
| ENSMUSG00000051329 | <i>Nup160</i>       | 1.13 | 1.07  | 1.38 | 0.84  |
| ENSMUSG00000051339 | <i>2900026A02Ri</i> | 4.16 | 5.06  | 4.6  | 4.71  |
| ENSMUSG00000051346 | <i>Spryd4</i>       | 5.16 | 5.16  | 4.86 | 4.64  |
| ENSMUSG00000051351 | <i>Zfp46</i>        | 0.12 | 0.81  | 1.11 | 0.44  |

|                    |                     |      |      |      |      |
|--------------------|---------------------|------|------|------|------|
| ENSMUSG00000051355 | <i>Commdl</i>       | 5.14 | 4.19 | 4.59 | 4.63 |
| ENSMUSG00000051359 | <i>Ncald</i>        | 2.87 | 2.9  | 2.26 | 2.37 |
| ENSMUSG00000051375 | <i>Pcdhl</i>        | 4.8  | 5.94 | 5.45 | 5.4  |
| ENSMUSG00000051390 | <i>Zbtb22</i>       | 3.04 | 3.82 | 3.31 | 2.75 |
| ENSMUSG00000051391 | <i>Ywhag</i>        | 5.44 | 5.69 | 5.5  | 5.61 |
| ENSMUSG00000051396 | <i>Hspa14</i>       | 3.42 | 3.4  | 3.57 | 3.37 |
| ENSMUSG00000051403 | <i>BC024868</i>     | 4.78 | 5.62 | 5.14 | 5.22 |
| ENSMUSG00000051413 | <i>Plagl2</i>       | 1.02 | 1.01 | 0.99 | 0.8  |
| ENSMUSG00000051427 | <i>4930562D19Ri</i> | 1.71 | 1.96 | 2.1  | 1.82 |
| ENSMUSG00000051428 | <i>NA</i>           | 1.31 | 1.32 | 1.22 | 1.54 |
| ENSMUSG00000051439 | <i>Cd14</i>         | 1.85 | 1.65 | 1.7  | 1.7  |
| ENSMUSG00000051451 | <i>BC051589</i>     | 2.55 | 1.74 | 2.2  | 1.67 |
| ENSMUSG00000051452 | <i>OTTMUSG000</i>   | 3.96 | 3.31 | 3.23 | 2.6  |
| ENSMUSG00000051469 | <i>AK088914</i>     | 3.92 | 2.82 | 2.83 | 2.57 |
| ENSMUSG00000051483 | <i>Cbr1</i>         | 6.78 | 6.88 | 6.54 | 6.59 |
| ENSMUSG00000051495 | <i>NA</i>           | 4.2  | 4.69 | 4.64 | 4.46 |
| ENSMUSG00000051502 | <i>2700038N03Ri</i> | 0.49 | 1.39 | 1.98 | 2.21 |
| ENSMUSG00000051510 | <i>Mafg</i>         | 4.01 | 4.3  | 3.73 | 3.52 |
| ENSMUSG00000051518 | <i>Rps19bp1</i>     | 3.95 | 4.47 | 4.59 | 4.33 |
| ENSMUSG00000051554 | <i>NA</i>           | 3.78 | 2.51 | 3.17 | 3.1  |
| ENSMUSG00000051557 | <i>NA</i>           | 1.95 | 2.35 | 2.41 | 2.1  |
| ENSMUSG00000051578 | <i>Cmtm4</i>        | 3.32 | 3.21 | 2.82 | 2.97 |
| ENSMUSG00000051579 | <i>Tceal8</i>       | 5.25 | 4.23 | 4.98 | 4.82 |
| ENSMUSG00000051586 | <i>NA</i>           | 1.77 | 1.8  | 2.4  | 2.07 |
| ENSMUSG00000051615 | <i>Rap2a</i>        | 2.78 | 2.61 | 3.13 | 2.91 |
| ENSMUSG00000051650 | <i>B3gnt2</i>       | 3.44 | 3.15 | 3.53 | 3.17 |
| ENSMUSG00000051652 | <i>Lrrc3</i>        | 4.57 | 5.26 | 4.71 | 5.06 |
| ENSMUSG00000051669 | <i>AU021092</i>     | 1.06 | 1.08 | 1.33 | 0.53 |
| ENSMUSG00000051671 | <i>1810063B05Ri</i> | 4.77 | 4.29 | 5.18 | 4.42 |
| ENSMUSG00000051674 | <i>Dcun1d4</i>      | 3.62 | 3.12 | 3.49 | 3.2  |
| ENSMUSG00000051675 | <i>Trim32</i>       | 2.25 | 2.2  | 1.96 | 1.71 |

|                    |                     |       |        |      |       |
|--------------------|---------------------|-------|--------|------|-------|
| ENSMUSG00000051682 | <i>Trem14</i>       | 1.62  | 1.47   | 1.19 | 1.11  |
| ENSMUSG00000051695 | <i>Pcbp1</i>        | 6.29  | 7.05   | 6.43 | 6.49  |
| ENSMUSG00000051705 | <i>Senp8</i>        | 0.69  | 0.2    | 1.17 | -0.26 |
| ENSMUSG00000051716 | <i>Apon</i>         | 7.93  | 8.17   | 8.05 | 7.94  |
| ENSMUSG00000051721 | <i>BC068281</i>     | 1.49  | 1.21   | 1.64 | 1.48  |
| ENSMUSG00000051730 | <i>Mettl5</i>       | 2.59  | 1.93   | 2.64 | 2.24  |
| ENSMUSG00000051748 | <i>I100001G20Ri</i> | 9.68  | 9.41   | 9.95 | 9.57  |
| ENSMUSG00000051761 | <i>NA</i>           | 4.34  | 5.26   | 5.08 | 4.19  |
| ENSMUSG00000051768 | <i>Xrcc1</i>        | 2.17  | 2.68   | 2.88 | 2.81  |
| ENSMUSG00000051786 | <i>NA</i>           | 3.43  | 3.56   | 3.52 | 3.17  |
| ENSMUSG00000051811 | <i>Cox6b2</i>       | 5.06  | 4.81   | 5.27 | 5.16  |
| ENSMUSG00000051839 | <i>Gypa</i>         | -4.19 | #NAME? | 1.22 | -1.02 |
| ENSMUSG00000051853 | <i>Arf3</i>         | 4.59  | 5.02   | 4.42 | 4.42  |
| ENSMUSG00000051864 | <i>Tbcd22a</i>      | 3.23  | 3.23   | 3.44 | 3.06  |
| ENSMUSG00000051907 | <i>NA</i>           | 0.32  | 0.6    | 1.93 | 0.64  |
| ENSMUSG00000051910 | <i>Sox6</i>         | 1.79  | 1.49   | 1.69 | 1.2   |
| ENSMUSG00000051934 | <i>Spats2</i>       | 1.52  | 1.13   | 1.48 | 1.31  |
| ENSMUSG00000051977 | <i>NA</i>           | 1.06  | 0.28   | 1.23 | 0.56  |
| ENSMUSG00000051978 | <i>Erich1</i>       | 1.05  | 0.95   | 0.82 | 0.63  |
| ENSMUSG00000051984 | <i>Sec31b</i>       | 1.29  | 0.9    | 1.49 | 0.87  |
| ENSMUSG00000051989 | <i>I190017O12Ri</i> | 2.85  | 3.15   | 3    | 3     |
| ENSMUSG00000052024 | <i>NA</i>           | 4.98  | 4.22   | 4.52 | 5.39  |
| ENSMUSG00000052033 | <i>Pfdn4</i>        | 3.02  | 1.49   | 2.66 | 2.56  |
| ENSMUSG00000052040 | <i>Klf13</i>        | 3.51  | 3.91   | 3.67 | 3.28  |
| ENSMUSG00000052056 | <i>Zfp217</i>       | 1.13  | 1.49   | 1.28 | 0.93  |
| ENSMUSG00000052085 | <i>Dock8</i>        | 3.16  | 2.81   | 2.87 | 2.48  |
| ENSMUSG00000052102 | <i>Gnpdal</i>       | 3.38  | 3.52   | 3.51 | 3.59  |
| ENSMUSG00000052117 | <i>D630039A03R</i>  | 2.84  | 2.86   | 1.65 | 1.11  |
| ENSMUSG00000052131 | <i>Akr1b7</i>       | 0.94  | 0.28   | 1.32 | -0.09 |
| ENSMUSG00000052139 | <i>Bre</i>          | 4.11  | 3.7    | 3.94 | 3.66  |
| ENSMUSG00000052144 | <i>Ppp4r2</i>       | 3     | 2.04   | 2.39 | 1.92  |

|                    |                 |      |       |      |       |
|--------------------|-----------------|------|-------|------|-------|
| ENSMUSG00000052151 | <i>Ppap2c</i>   | 3.41 | 4.46  | 3.8  | 3.79  |
| ENSMUSG00000052154 | <i>NA</i>       | 0.39 | 2.34  | 1.37 | 1.55  |
| ENSMUSG00000052155 | <i>Acvr2a</i>   | 3.66 | 2.55  | 3.2  | 2.72  |
| ENSMUSG00000052160 | <i>Pld4</i>     | 2.23 | 2.33  | 2.1  | 2.26  |
| ENSMUSG00000052192 | <i>NA</i>       | 0.59 | 1.04  | 1.01 | 2.03  |
| ENSMUSG00000052214 | <i>Opa3</i>     | 4.9  | 5.37  | 5.06 | 4.88  |
| ENSMUSG00000052229 | <i>Gpr17</i>    | 1.02 | 1.36  | 1.14 | 0.97  |
| ENSMUSG00000052253 | <i>Zfp622</i>   | 4.18 | 4.27  | 4.25 | 4.11  |
| ENSMUSG00000052293 | <i>Taf9</i>     | 3.34 | 3.09  | 3.42 | 2.81  |
| ENSMUSG00000052296 | <i>Saps1</i>    | 5.12 | 5.63  | 5.43 | 5.28  |
| ENSMUSG00000052298 | <i>Cdc42se2</i> | 2.84 | 2.96  | 2.75 | 2.31  |
| ENSMUSG00000052299 | <i>Zfp294</i>   | 3.22 | 2.64  | 3.21 | 2.58  |
| ENSMUSG00000052302 | <i>NA</i>       | 1.03 | -0.17 | 2.24 | 1.17  |
| ENSMUSG00000052305 | <i>NA</i>       | 5.14 | 6.69  | 7.45 | 7.67  |
| ENSMUSG00000052310 | <i>Slc39a1</i>  | 4.7  | 4.87  | 4.73 | 4.51  |
| ENSMUSG00000052337 | <i>Immt</i>     | 5.77 | 5.55  | 5.47 | 5.14  |
| ENSMUSG00000052369 | <i>AK177749</i> | 3.9  | 4.17  | 4.04 | 3.64  |
| ENSMUSG00000052384 | <i>Lrrc33</i>   | 1.49 | 1.5   | 1.37 | 1.11  |
| ENSMUSG00000052392 | <i>Acot4</i>    | 4.95 | 3.98  | 4.17 | 3.94  |
| ENSMUSG00000052395 | <i>Rft1</i>     | 3.32 | 3.02  | 3.21 | 2.94  |
| ENSMUSG00000052397 | <i>Vil2</i>     | 1.32 | 1.67  | 1.74 | 1.37  |
| ENSMUSG00000052406 | <i>Rexo4</i>    | 2.72 | 3.24  | 2.68 | 2.78  |
| ENSMUSG00000052414 | <i>Atf7</i>     | 1.64 | 1.38  | 1.59 | 1.43  |
| ENSMUSG00000052419 | <i>NA</i>       | 4.41 | 4.48  | 4.67 | 4.67  |
| ENSMUSG00000052423 | <i>B4galt3</i>  | 2.29 | 2.36  | 2.4  | 2.59  |
| ENSMUSG00000052428 | <i>Tmcol</i>    | 6.69 | 6.13  | 6.52 | 5.84  |
| ENSMUSG00000052429 | <i>Prmt1</i>    | 2.61 | 3.29  | 3.01 | 3.04  |
| ENSMUSG00000052439 | <i>NA</i>       | 1.04 | 0.29  | 0.15 | -0.66 |
| ENSMUSG00000052446 | <i>NA</i>       | 2.33 | 1.76  | 1.42 | 0.65  |
| ENSMUSG00000052456 | <i>Asnal</i>    | 4.9  | 5.62  | 5.16 | 5.01  |
| ENSMUSG00000052459 | <i>Atp6v1a</i>  | 4.69 | 4.2   | 4.4  | 3.97  |

|                    |                     |      |      |      |      |
|--------------------|---------------------|------|------|------|------|
| ENSMUSG00000052488 | <i>Cherp</i>        | 3.26 | 3.92 | 3.48 | 3.35 |
| ENSMUSG00000052520 | <i>Cyp2j5</i>       | 8.38 | 7.54 | 8.01 | 7.57 |
| ENSMUSG00000052533 | <i>mKIAA0169</i>    | 1.09 | 1.85 | 1.76 | 1.41 |
| ENSMUSG00000052534 | <i>Pbx1</i>         | 2.31 | 2.27 | 2.64 | 2.49 |
| ENSMUSG00000052539 | <i>Magi3</i>        | 2.89 | 2.94 | 2.93 | 2.6  |
| ENSMUSG00000052562 | <i>C730048C13R</i>  | 5.01 | 4.07 | 4.86 | 4.22 |
| ENSMUSG00000052563 | <i>NA</i>           | 0.74 | 2.12 | 1.28 | 0.67 |
| ENSMUSG00000052566 | <i>Hook2</i>        | 2.47 | 2.82 | 3.01 | 2.73 |
| ENSMUSG00000052593 | <i>Adam17</i>       | 3.7  | 3.27 | 3.35 | 3.01 |
| ENSMUSG00000052595 | <i>1810073H04Ri</i> | 6.03 | 5.45 | 5.81 | 5.5  |
| ENSMUSG00000052605 | <i>Isoc2b</i>       | 3.84 | 3.66 | 4.28 | 3.99 |
| ENSMUSG00000052609 | <i>Plekhg3</i>      | 2.94 | 3.68 | 3.9  | 3.93 |
| ENSMUSG00000052632 | <i>Ddef2</i>        | 2.27 | 1.85 | 1.84 | 1.05 |
| ENSMUSG00000052656 | <i>Rnf103</i>       | 5.14 | 4.16 | 5.15 | 4.44 |
| ENSMUSG00000052673 | <i>NA</i>           | -0.2 | 1.97 | 1.16 | 1.22 |
| ENSMUSG00000052676 | <i>Zmat1</i>        | 2.07 | 0.84 | 2.22 | 1.24 |
| ENSMUSG00000052681 | <i>Rap1b</i>        | 5.69 | 4.75 | 5.04 | 4.68 |
| ENSMUSG00000052684 | <i>Jun</i>          | 1.33 | 1.77 | 2.61 | 2.63 |
| ENSMUSG00000052707 | <i>Tnrc6a</i>       | 3.22 | 2.82 | 3.27 | 2.61 |
| ENSMUSG00000052712 | <i>BC004004</i>     | 6.25 | 6.04 | 5.92 | 5.43 |
| ENSMUSG00000052714 | <i>NA</i>           | 3.08 | 0.68 | 2.81 | 2.12 |
| ENSMUSG00000052738 | <i>Sucla1</i>       | 7.6  | 7.44 | 7.76 | 7.26 |
| ENSMUSG00000052747 | <i>NA</i>           | 5.31 | 5.09 | 5.19 | 4.89 |
| ENSMUSG00000052748 | <i>1200016B10Ri</i> | 3.36 | 2.46 | 3.05 | 2.81 |
| ENSMUSG00000052751 | <i>Repin1</i>       | 4.48 | 5.11 | 4.35 | 4.19 |
| ENSMUSG00000052752 | <i>Traf7</i>        | 2.21 | 2.71 | 2.24 | 2.08 |
| ENSMUSG00000052757 | <i>NA</i>           | 5.01 | 2.67 | 4.02 | 3.23 |
| ENSMUSG00000052763 | <i>Zfp212</i>       | 2.08 | 2.34 | 2.1  | 1.42 |
| ENSMUSG00000052794 | <i>1700030K09Ri</i> | 1.01 | 1.49 | 1.03 | 0.46 |
| ENSMUSG00000052800 | <i>NA</i>           | 3.07 | 3.7  | 3.9  | 4.05 |
| ENSMUSG00000052825 | <i>NA</i>           | 4.43 | 3.54 | 3.63 | 4.05 |

|                    |                     |      |      |      |      |
|--------------------|---------------------|------|------|------|------|
| ENSMUSG00000052833 | <i>Sae1</i>         | 5.22 | 5.32 | 5.35 | 5.5  |
| ENSMUSG00000052837 | <i>Junb</i>         | 2.26 | 3.74 | 3.31 | 2.86 |
| ENSMUSG00000052894 | <i>NA</i>           | 3.71 | 3.17 | 3.18 | 4.2  |
| ENSMUSG00000052906 | <i>Ubx6</i>         | 4.45 | 4.26 | 4.32 | 4.07 |
| ENSMUSG00000052914 | <i>Cyp2j6</i>       | 5.83 | 4.59 | 5.34 | 4.74 |
| ENSMUSG00000052915 | <i>4121402D02Ri</i> | 3.95 | 3.92 | 3.68 | 3.63 |
| ENSMUSG00000052917 | <i>Senp7</i>        | 1.01 | 0.41 | 0.75 | 0.23 |
| ENSMUSG00000052926 | <i>Rnaseh2a</i>     | 3    | 2.97 | 3.35 | 3.15 |
| ENSMUSG00000052928 | <i>Gm672</i>        | 3.03 | 3.54 | 2.85 | 3.01 |
| ENSMUSG00000052934 | <i>NA</i>           | 5.8  | 5.01 | 5.96 | 5.34 |
| ENSMUSG00000052957 | <i>Gas1</i>         | 1.84 | 3.1  | 2.05 | 1.8  |
| ENSMUSG00000052962 | <i>Mrpl35</i>       | 3.66 | 2.6  | 2.97 | 2.75 |
| ENSMUSG00000052974 | <i>Cyp2f2</i>       | 8.86 | 8.91 | 9.27 | 9.25 |
| ENSMUSG00000052997 | <i>Sae2</i>         | 4.05 | 3.61 | 3.69 | 3.45 |
| ENSMUSG00000053012 | <i>Krcc1</i>        | 5.57 | 4.61 | 5.17 | 4.42 |
| ENSMUSG00000053051 | <i>NA</i>           | 3.09 | 2.62 | 3.06 | 2.93 |
| ENSMUSG00000053062 | <i>Jam2</i>         | 2.44 | 1.98 | 2.17 | 2.11 |
| ENSMUSG00000053090 | <i>NA</i>           | 2.52 | 2    | 2.26 | 1.7  |
| ENSMUSG00000053094 | <i>0610007L01Ri</i> | 4.88 | 5.19 | 4.84 | 4.72 |
| ENSMUSG00000053110 | <i>Yap1</i>         | 4.74 | 4.84 | 4.77 | 4.64 |
| ENSMUSG00000053119 | <i>Vps24</i>        | 4.41 | 4.34 | 4.32 | 4.17 |
| ENSMUSG00000053134 | <i>Supt7l</i>       | 2.18 | 2.43 | 2.23 | 2.07 |
| ENSMUSG00000053158 | <i>Fes</i>          | 1.63 | 1.74 | 2.33 | 1.56 |
| ENSMUSG00000053168 | <i>9030619P08Ri</i> | 6.56 | 4.74 | 4.97 | 5.01 |
| ENSMUSG00000053175 | <i>Bcl3</i>         | 3.72 | 5.23 | 3.83 | 4.23 |
| ENSMUSG00000053219 | <i>Raet1e</i>       | 1.87 | 0.5  | 1.94 | 0.7  |
| ENSMUSG00000053226 | <i>SP1</i>          | 0.6  | 1.25 | 1.18 | 0.75 |
| ENSMUSG00000053253 | <i>Ndfip2</i>       | 5.18 | 4.04 | 4.7  | 4.28 |
| ENSMUSG00000053279 | <i>Aldh1a1</i>      | 9.11 | 9.04 | 9.08 | 8.54 |
| ENSMUSG00000053286 | <i>1190005F20Ri</i> | 3.85 | 3.35 | 3.63 | 3.54 |
| ENSMUSG00000053289 | <i>NA</i>           | 2.71 | 2.69 | 2.25 | 2.03 |



|                    |                    |      |      |      |      |
|--------------------|--------------------|------|------|------|------|
| ENSMUSG00000053291 | <i>Rab4b</i>       | 3.45 | 3.29 | 3.46 | 3.6  |
| ENSMUSG00000053293 | <i>Pom121</i>      | 2.43 | 2.93 | 2.79 | 2.84 |
| ENSMUSG00000053303 | <i>BC014805</i>    | 7.13 | 6.62 | 6.09 | 6.01 |
| ENSMUSG00000053317 | <i>Sec61b</i>      | 4.95 | 3.45 | 4.81 | 5.28 |
| ENSMUSG00000053329 | <i>D10Jhu81e</i>   | 6.39 | 6.86 | 6.67 | 6.41 |
| ENSMUSG00000053332 | <i>NA</i>          | 4.35 | 3.86 | 4.05 | 4.45 |
| ENSMUSG00000053333 | <i>Dis3l2</i>      | 2.54 | 2.58 | 2.37 | 2.35 |
| ENSMUSG00000053334 | <i>D5Ert40e</i>    | 2.14 | 3.25 | 2.38 | 2.4  |
| ENSMUSG00000053347 | <i>4930432O21R</i> | 2.66 | 1.07 | 1.82 | 1.26 |
| ENSMUSG00000053353 | <i>NA</i>          | 0.58 | 1.07 | 1.5  | 1.65 |
| ENSMUSG00000053358 | <i>NA</i>          | 1.36 | 2.28 | 1.92 | 1.13 |
| ENSMUSG00000053390 | <i>C920016K16R</i> | 1.46 | 1.04 | 0.7  | 0.45 |
| ENSMUSG00000053407 | <i>NA</i>          | 0.79 | 1.83 | 1.63 | 1.47 |
| ENSMUSG00000053411 | <i>Cbx7</i>        | 0.98 | 1.85 | 1.65 | 1.66 |
| ENSMUSG00000053436 | <i>Mapk14</i>      | 5.35 | 5.34 | 5.42 | 5.32 |
| ENSMUSG00000053453 | <i>Thoc7</i>       | 5.49 | 4.46 | 5.22 | 4.56 |
| ENSMUSG00000053460 | <i>Ggcx</i>        | 5.55 | 5.43 | 5.34 | 5.11 |
| ENSMUSG00000053470 | <i>Jmjd1a</i>      | 2.37 | 1.81 | 2.49 | 2    |
| ENSMUSG00000053474 | <i>NA</i>          | 4.21 | 5.28 | 5.01 | 5.18 |
| ENSMUSG00000053477 | <i>Tcf4</i>        | 1.3  | 1.22 | 1.65 | 1.7  |
| ENSMUSG00000053483 | <i>Usp21</i>       | 2.97 | 3.42 | 3.1  | 2.75 |
| ENSMUSG00000053510 | <i>Nrd1</i>        | 5.09 | 4.92 | 5.01 | 4.52 |
| ENSMUSG00000053536 | <i>Cstf2t</i>      | 3.83 | 3.27 | 3.44 | 2.97 |
| ENSMUSG00000053559 | <i>BC004728</i>    | 4.43 | 4.86 | 4.22 | 4.12 |
| ENSMUSG00000053560 | <i>Ier2</i>        | 3.74 | 4.94 | 3.96 | 4.05 |
| ENSMUSG00000053565 | <i>Eif3k</i>       | 5.6  | 5.98 | 6.1  | 6.36 |
| ENSMUSG00000053581 | <i>Zfand2a</i>     | 2.59 | 2.62 | 2.39 | 2.53 |
| ENSMUSG00000053588 | <i>NA</i>          | 2.34 | 3.2  | 2.65 | 3.05 |
| ENSMUSG00000053600 | <i>Zfp472</i>      | 0.89 | 0.72 | 1.02 | 0.28 |
| ENSMUSG00000053603 | <i>NA</i>          | 0.44 | 1.63 | 2.21 | 1.81 |
| ENSMUSG00000053604 | <i>Rpia</i>        | 1.3  | 0.41 | 1.75 | 0.85 |

|                    |                  |      |      |      |      |
|--------------------|------------------|------|------|------|------|
| ENSMUSG00000053613 | NA               | 0.76 | 1.87 | 1.97 | 1.66 |
| ENSMUSG00000053617 | <i>Sh3pxd2a</i>  | 1.6  | 1.63 | 1.93 | 1.93 |
| ENSMUSG00000053641 | NA               | 1.6  | 0.42 | 1.75 | 1.21 |
| ENSMUSG00000053644 | <i>Aldh7a1</i>   | 8.03 | 7.93 | 8.09 | 7.72 |
| ENSMUSG00000053646 | <i>Plxnb1</i>    | 0.32 | 1.26 | 1.48 | 0.82 |
| ENSMUSG00000053664 | NA               | 2.11 | 1.51 | 2.69 | 1.99 |
| ENSMUSG00000053684 | <i>BC048403</i>  | 0.92 | 1.56 | 1.55 | 1.22 |
| ENSMUSG00000053714 | NA               | 0.51 | 1.58 | 1.7  | 1.01 |
| ENSMUSG00000053716 | <i>Dusp7</i>     | 1.65 | 2.13 | 1.64 | 1.42 |
| ENSMUSG00000053730 | <i>Tmem39b</i>   | 1.66 | 2.35 | 1.87 | 1.74 |
| ENSMUSG00000053754 | <i>Chd8</i>      | 2.85 | 3.02 | 2.8  | 2.46 |
| ENSMUSG00000053768 | <i>Chchd3</i>    | 6    | 5.5  | 5.92 | 5.6  |
| ENSMUSG00000053774 | NA               | 2.6  | 2.03 | 2.35 | 2.17 |
| ENSMUSG00000053799 | <i>Exoc6</i>     | 3.6  | 2.66 | 3.44 | 3.14 |
| ENSMUSG00000053801 | <i>Grwd1</i>     | 1.99 | 3.64 | 2.9  | 2.85 |
| ENSMUSG00000053819 | <i>mKIAA4163</i> | 1.4  | 0.08 | 1.57 | 0.6  |
| ENSMUSG00000053835 | <i>H2-T24</i>    | 2.67 | 2.38 | 2.2  | 2.55 |
| ENSMUSG00000053838 | <i>Nudcd3</i>    | 4.2  | 4.48 | 4.31 | 4.18 |
| ENSMUSG00000053841 | <i>Txlna</i>     | 3.39 | 3.94 | 3.1  | 2.99 |
| ENSMUSG00000053846 | <i>Lipg</i>      | 3.32 | 1.5  | 3.03 | 2.92 |
| ENSMUSG00000053870 | <i>Fpgt</i>      | 3.08 | 1.95 | 2.35 | 2.18 |
| ENSMUSG00000053877 | NA               | 3.34 | 3.46 | 3.52 | 3.39 |
| ENSMUSG00000053886 | NA               | 2.7  | 2.57 | 3.1  | 2.18 |
| ENSMUSG00000053897 | <i>Slc39a8</i>   | 4.84 | 4.35 | 4.13 | 4.2  |
| ENSMUSG00000053898 | <i>Ech1</i>      | 8.2  | 7.78 | 8.26 | 7.94 |
| ENSMUSG00000053906 | NA               | 3.47 | 4.26 | 3.79 | 3.6  |
| ENSMUSG00000053907 | <i>Mat2a</i>     | 5.14 | 4.78 | 5.03 | 4.61 |
| ENSMUSG00000053929 | <i>Cyhr1</i>     | 4.11 | 4.97 | 4.48 | 4.4  |
| ENSMUSG00000053931 | <i>Cnn3</i>      | 5.47 | 5.11 | 5.3  | 4.96 |
| ENSMUSG00000053935 | NA               | 2.35 | 1.29 | 2.11 | 1.5  |
| ENSMUSG00000053950 | NA               | 1.37 | 1.56 | 1.69 | 1.77 |

|                    |                      |       |       |       |       |
|--------------------|----------------------|-------|-------|-------|-------|
| ENSMUSG00000053964 | <i>Lgals4</i>        | 1.71  | 1.19  | 1.96  | 0.4   |
| ENSMUSG00000054008 | <i>Ndst1</i>         | 5.16  | 5.36  | 5.2   | 5.04  |
| ENSMUSG00000054021 | <i>Sirt5</i>         | 3.13  | 2.81  | 3.02  | 2.48  |
| ENSMUSG00000054027 | <i>Nt5dc3</i>        | 2.88  | 2.93  | 2.8   | 2.82  |
| ENSMUSG00000054051 | <i>Ercc6</i>         | 1.12  | 0.5   | 0.9   | 0.69  |
| ENSMUSG00000054072 | <i>ligp1</i>         | 7.68  | 6.3   | 6.49  | 6.47  |
| ENSMUSG00000054079 | <i>Utp18</i>         | 2.59  | 2.61  | 2.61  | 2.03  |
| ENSMUSG00000054083 | <i>Capn12</i>        | 3.54  | 2.48  | 3.4   | 3.1   |
| ENSMUSG00000054091 | <i>1810037117Rik</i> | 3.55  | 3.13  | 3.6   | 3.12  |
| ENSMUSG00000054111 | <i>NA</i>            | 1.96  | 2.72  | 3.21  | 2.99  |
| ENSMUSG00000054178 | <i>NA</i>            | 1.51  | 0.46  | 0.92  | -0.09 |
| ENSMUSG00000054191 | <i>Klfl</i>          | 0.24  | 0.36  | 1.45  | 0.22  |
| ENSMUSG00000054199 | <i>NA</i>            | 1.1   | 1.87  | 1.43  | 1.16  |
| ENSMUSG00000054226 | <i>Tprkb</i>         | 5.74  | 5.46  | 5.93  | 5.56  |
| ENSMUSG00000054237 | <i>5730455O13Rik</i> | 2.65  | 1.92  | 2.82  | 2.15  |
| ENSMUSG00000054252 | <i>Fgfr3</i>         | 2.81  | 3.08  | 2.94  | 2.76  |
| ENSMUSG00000054263 | <i>Lifr</i>          | 6.94  | 6.72  | 6.2   | 6.2   |
| ENSMUSG00000054277 | <i>Arfgap3</i>       | 1.95  | 2.49  | 1.69  | 1.65  |
| ENSMUSG00000054280 | <i>C330019G07Rik</i> | 2.72  | 2.32  | 2.16  | 1.94  |
| ENSMUSG00000054302 | <i>Eapp</i>          | 4.57  | 4.47  | 4.38  | 4.03  |
| ENSMUSG00000054309 | <i>Cpsf3</i>         | 4.68  | 4.66  | 4.67  | 4.31  |
| ENSMUSG00000054312 | <i>Mrps21</i>        | 4.31  | 4.43  | 4.56  | 4.69  |
| ENSMUSG00000054364 | <i>Rhob</i>          | 3.78  | 5.03  | 4.21  | 4.2   |
| ENSMUSG00000054387 | <i>Mdm4</i>          | 2.58  | 1.72  | 2.01  | 1.29  |
| ENSMUSG00000054404 | <i>Slfn5</i>         | 2.14  | 1.32  | 0.84  | 1.02  |
| ENSMUSG00000054405 | <i>Dnajc8</i>        | 3.73  | 3.07  | 3.28  | 3.07  |
| ENSMUSG00000054408 | <i>Spes3</i>         | 4.67  | 4.7   | 4.63  | 4.37  |
| ENSMUSG00000054414 | <i>Slc30a7</i>       | 2.89  | 2.8   | 2.78  | 2.9   |
| ENSMUSG00000054417 | <i>Cyp3a44</i>       | 7.3   | 4.6   | 5.41  | 4.26  |
| ENSMUSG00000054422 | <i>Fabp1</i>         | 10.46 | 10.09 | 10.26 | 10.23 |
| ENSMUSG00000054426 | <i>NA</i>            | 2.73  | 3.15  | 3.86  | 3.41  |

|                    |                      |      |      |       |      |
|--------------------|----------------------|------|------|-------|------|
| ENSMUSG00000054428 | <i>Atpif1</i>        | 5.23 | 5.08 | 5.09  | 4.77 |
| ENSMUSG00000054435 | <i>Gimap4</i>        | 3.29 | 3.02 | 2.83  | 2.64 |
| ENSMUSG00000054452 | <i>Aes</i>           | 8.88 | 9.42 | 9.16  | 8.97 |
| ENSMUSG00000054455 | <i>Vapb</i>          | 5.67 | 5.63 | 5.46  | 5.23 |
| ENSMUSG00000054469 | <i>Lycat</i>         | 4.85 | 4.22 | 4.64  | 4.28 |
| ENSMUSG00000054474 | <i>Thns12</i>        | 5.21 | 5.23 | 5.34  | 4.72 |
| ENSMUSG00000054477 | <i>Kcnn2</i>         | 4.53 | 4.67 | 4.84  | 4.64 |
| ENSMUSG00000054484 | <i>Tmem62</i>        | 2.97 | 2.51 | 2.93  | 2.17 |
| ENSMUSG00000054499 | <i>Dedd2</i>         | 3.88 | 4.94 | 4.96  | 4.8  |
| ENSMUSG00000054509 | NA                   | 2.18 | 2.01 | 2.66  | 2.29 |
| ENSMUSG00000054517 | <i>Trim65</i>        | 1.67 | 1.83 | 1.74  | 1.69 |
| ENSMUSG00000054519 | <i>BC050078</i>      | 1.29 | 0.33 | 0.84  | 0.44 |
| ENSMUSG00000054520 | <i>Sh3bp2</i>        | 2.67 | 3.02 | 2.75  | 2.7  |
| ENSMUSG00000054545 | <i>Ugt1a10</i>       | 7.73 | 7.17 | 7.44  | 7.24 |
| ENSMUSG00000054574 | NA                   | 2.21 | 1.41 | 2.16  | 1.41 |
| ENSMUSG00000054588 | <i>LOC626578</i>     | 1.57 | 0.01 | -0.97 | -0.5 |
| ENSMUSG00000054604 | <i>Cggbp1</i>        | 4.98 | 3.8  | 4.38  | 3.97 |
| ENSMUSG00000054611 | <i>Fbxl11</i>        | 3.84 | 3.69 | 3.59  | 3.55 |
| ENSMUSG00000054612 | <i>Mgmt</i>          | 3.65 | 3.46 | 3.66  | 3.49 |
| ENSMUSG00000054619 | <i>Mettl7a</i>       | 7.1  | 6.73 | 7.04  | 7.08 |
| ENSMUSG00000054630 | <i>Ugt2b5</i>        | 7.71 | 7.37 | 7.44  | 7.32 |
| ENSMUSG00000054648 | <i>1200003I07Rik</i> | 3.13 | 2.65 | 2.8   | 2.37 |
| ENSMUSG00000054676 | <i>1600014C10Ri</i>  | 6.69 | 7.84 | 7.35  | 7.44 |
| ENSMUSG00000054690 | <i>Emcn</i>          | 0.72 | 0.57 | 1.21  | 0.68 |
| ENSMUSG00000054693 | <i>Adam10</i>        | 3.93 | 2.94 | 3.48  | 2.86 |
| ENSMUSG00000054715 | <i>Zscan22</i>       | 1.61 | 2.06 | 1.53  | 1.43 |
| ENSMUSG00000054716 | <i>Zfp771</i>        | 2.99 | 4.49 | 3.48  | 3.38 |
| ENSMUSG00000054720 | <i>Lrrc8c</i>        | 1.22 | 0.2  | 0.85  | 0.17 |
| ENSMUSG00000054723 | <i>AI662250</i>      | 2.81 | 3.4  | 3.08  | 3    |
| ENSMUSG00000054733 | <i>Msra</i>          | 6.64 | 6.7  | 6.64  | 6.51 |
| ENSMUSG00000054757 | <i>Akr1c20</i>       | 6.5  | 5.71 | 5.73  | 5.58 |

|                    |                    |      |      |      |      |
|--------------------|--------------------|------|------|------|------|
| ENSMUSG00000054766 | <i>AK031561</i>    | 3.48 | 2.55 | 3.14 | 2.64 |
| ENSMUSG00000054792 | <i>Klhl18</i>      | 1.59 | 1.85 | 1.79 | 1.51 |
| ENSMUSG00000054793 | <i>Cadm4</i>       | 1.03 | 2.88 | 1.36 | 2.11 |
| ENSMUSG00000054808 | <i>Actn4</i>       | 6.24 | 6.61 | 6.46 | 6.27 |
| ENSMUSG00000054814 | <i>Usp46</i>       | 2.74 | 1.87 | 2.55 | 1.82 |
| ENSMUSG00000054823 | <i>Whsc111</i>     | 2.52 | 2.69 | 2.19 | 2.06 |
| ENSMUSG00000054827 | <i>Cyp2c50</i>     | 8.7  | 7.73 | 8.18 | 8.09 |
| ENSMUSG00000054843 | <i>Atrnl1</i>      | 3.42 | 3.07 | 2.95 | 2.77 |
| ENSMUSG00000054855 | <i>Rnd1</i>        | 2.64 | 3.13 | 3.03 | 2.29 |
| ENSMUSG00000054874 | <i>Pcnxl3</i>      | 2.96 | 3.66 | 3.19 | 3.14 |
| ENSMUSG00000054889 | <i>NA</i>          | 4.38 | 4.04 | 4.18 | 3.69 |
| ENSMUSG00000054894 | <i>Atp5s</i>       | 2.08 | 0.71 | 1.58 | 0.83 |
| ENSMUSG00000054920 | <i>Klhl5</i>       | 2.78 | 2.74 | 2.88 | 2.42 |
| ENSMUSG00000055013 | <i>Centg2</i>      | 0.57 | 0.83 | 1.16 | 1.01 |
| ENSMUSG00000055024 | <i>Ep300</i>       | 2.93 | 2.77 | 3.08 | 3.02 |
| ENSMUSG00000055027 | <i>Smyd1</i>       | 1.99 | 1.78 | 1.52 | 1.36 |
| ENSMUSG00000055041 | <i>Commd5</i>      | 3.23 | 3.75 | 3.51 | 3.36 |
| ENSMUSG00000055044 | <i>Pdlim1</i>      | 3.12 | 3.91 | 3.17 | 3.37 |
| ENSMUSG00000055053 | <i>Nfic</i>        | 4.08 | 5.05 | 4.85 | 4.62 |
| ENSMUSG00000055065 | <i>Ddx17</i>       | 5.03 | 5.03 | 5.06 | 5.38 |
| ENSMUSG00000055116 | <i>Arntl</i>       | 3.88 | 3.88 | 2.38 | 1.62 |
| ENSMUSG00000055128 | <i>Cgrrf1</i>      | 5    | 4.44 | 4.95 | 4.61 |
| ENSMUSG00000055148 | <i>Klf2</i>        | 2.11 | 3.01 | 2.12 | 2.25 |
| ENSMUSG00000055172 | <i>Clr</i>         | 5.06 | 4.64 | 4.77 | 4.65 |
| ENSMUSG00000055178 | <i>NA</i>          | 5.42 | 4.14 | 5.12 | 4.39 |
| ENSMUSG00000055200 | <i>Sertad3</i>     | 2.04 | 2.24 | 2.03 | 1.66 |
| ENSMUSG00000055204 | <i>Ankrd17</i>     | 3.83 | 3.28 | 3.5  | 3.12 |
| ENSMUSG00000055228 | <i>8430426H19R</i> | 1.49 | 0.48 | 1.2  | 0.17 |
| ENSMUSG00000055239 | <i>Kcmfl</i>       | 5.67 | 5.44 | 5.62 | 5.39 |
| ENSMUSG00000055240 | <i>Zfp101</i>      | 1.63 | 0.38 | 1.32 | 0.25 |
| ENSMUSG00000055296 | <i>D730040F13R</i> | 2.19 | 1.41 | 2.21 | 1.88 |

|                    |                     |      |      |      |      |
|--------------------|---------------------|------|------|------|------|
| ENSMUSG00000055301 | <i>Adh7</i>         | 2.68 | 2.36 | 2.53 | 2.46 |
| ENSMUSG00000055302 | <i>Mrfap1</i>       | 5.21 | 5.37 | 5.27 | 5.07 |
| ENSMUSG00000055312 | <i>0610012H03R1</i> | 5.05 | 4    | 4.73 | 3.37 |
| ENSMUSG00000055319 | <i>Sec23ip</i>      | 3.78 | 3.71 | 3.39 | 3.38 |
| ENSMUSG00000055320 | <i>Tead1</i>        | 1.04 | 0.06 | 0.47 | 0.13 |
| ENSMUSG00000055322 | <i>NA</i>           | 4.67 | 5.24 | 4.78 | 4.69 |
| ENSMUSG00000055334 | <i>Snupn</i>        | 2.11 | 2.25 | 2.09 | 1.79 |
| ENSMUSG00000055371 | <i>Stam2</i>        | 2.6  | 2.35 | 2.53 | 2.12 |
| ENSMUSG00000055396 | <i>NA</i>           | 2.41 | 2.63 | 2.87 | 2.78 |
| ENSMUSG00000055401 | <i>Fbxo6</i>        | 4.23 | 4.76 | 4.36 | 3.96 |
| ENSMUSG00000055424 | <i>NA</i>           | 0.24 | 1.45 | 1.78 | 1.25 |
| ENSMUSG00000055435 | <i>Maf</i>          | 3.85 | 3.26 | 3.88 | 3.58 |
| ENSMUSG00000055436 | <i>Sfrs11</i>       | 3.78 | 3.38 | 3.78 | 3.13 |
| ENSMUSG00000055440 | <i>NA</i>           | 5.16 | 5.74 | 5.06 | 5    |
| ENSMUSG00000055447 | <i>Cd47</i>         | 5.92 | 5.67 | 5.89 | 5.59 |
| ENSMUSG00000055491 | <i>Pprc1</i>        | 2.01 | 2.59 | 1.98 | 2.42 |
| ENSMUSG00000055493 | <i>AK041609</i>     | 0.91 | 1.14 | 1.13 | 0.26 |
| ENSMUSG00000055531 | <i>Cpsf6</i>        | 3.21 | 3.1  | 3.04 | 2.77 |
| ENSMUSG00000055538 | <i>NA</i>           | 5.5  | 5.43 | 5.62 | 5.39 |
| ENSMUSG00000055546 | <i>Timd4</i>        | 2.82 | 1.99 | 1.96 | 1.91 |
| ENSMUSG00000055553 | <i>Uba52</i>        | 4.02 | 4.74 | 4.5  | 4.35 |
| ENSMUSG00000055593 | <i>NA</i>           | 2.35 | 1.42 | 1.74 | 1.85 |
| ENSMUSG00000055652 | <i>Klhl25</i>       | 2.78 | 3.99 | 3.11 | 3.08 |
| ENSMUSG00000055660 | <i>Mettl4</i>       | 2.15 | 1.25 | 1.91 | 1.39 |
| ENSMUSG00000055670 | <i>Zzefl</i>        | 2.64 | 2.82 | 2.67 | 2.38 |
| ENSMUSG00000055681 | <i>Copel</i>        | 6.01 | 6.84 | 6.34 | 6.16 |
| ENSMUSG00000055707 | <i>Klhl26</i>       | 2.01 | 2.42 | 2.32 | 2.05 |
| ENSMUSG00000055720 | <i>Ubl7</i>         | 4.89 | 5.15 | 5.33 | 5.03 |
| ENSMUSG00000055723 | <i>Rras2</i>        | 3.47 | 2.86 | 3.43 | 2.88 |
| ENSMUSG00000055725 | <i>Paqr3</i>        | 2.25 | 1.98 | 2.34 | 1.97 |
| ENSMUSG00000055730 | <i>Ces6</i>         | 6.91 | 7.15 | 7.09 | 7.27 |

|                    |                     |       |      |       |      |
|--------------------|---------------------|-------|------|-------|------|
| ENSMUSG00000055737 | <i>Ghr</i>          | 7.31  | 6.76 | 6.98  | 6.71 |
| ENSMUSG00000055755 | <i>NA</i>           | 0.86  | 2.02 | 1.28  | 1.29 |
| ENSMUSG00000055760 | <i>Gemin6</i>       | 1.47  | 0.49 | 1.56  | 1.09 |
| ENSMUSG00000055762 | <i>Eef1d</i>        | 2.63  | 3.18 | 3.14  | 2.98 |
| ENSMUSG00000055771 | <i>NA</i>           | 1.58  | 0.84 | 1.18  | 2.09 |
| ENSMUSG00000055782 | <i>Abcd2</i>        | 4     | 3.74 | 2.95  | 3.08 |
| ENSMUSG00000055799 | <i>Tcf3</i>         | 2.24  | 2.49 | 2.26  | 2.34 |
| ENSMUSG00000055802 | <i>NA</i>           | 1.45  | 1.39 | 2.78  | 2.07 |
| ENSMUSG00000055817 | <i>Mta3</i>         | 1.02  | 1.07 | 1.14  | 0.79 |
| ENSMUSG00000055835 | <i>Zfp1</i>         | 2.01  | 1.62 | 2     | 1.5  |
| ENSMUSG00000055839 | <i>Tceb2</i>        | 5.06  | 4.13 | 4.96  | 4.7  |
| ENSMUSG00000055849 | <i>NA</i>           | 3.59  | 3.4  | 3.36  | 2.71 |
| ENSMUSG00000055850 | <i>Rnf181</i>       | 5.63  | 5.73 | 5.74  | 5.6  |
| ENSMUSG00000055862 | <i>9030607L17Ri</i> | 1.36  | 2.02 | 1.9   | 1.73 |
| ENSMUSG00000055866 | <i>Per2</i>         | 0.63  | 1.22 | 2.33  | 2.73 |
| ENSMUSG00000055900 | <i>Tmem69</i>       | 4.12  | 2.98 | 4.08  | 3.81 |
| ENSMUSG00000055912 | <i>Tmem150</i>      | 5.33  | 5.42 | 5.4   | 5.28 |
| ENSMUSG00000055917 | <i>Zfp277</i>       | 2.53  | 1.81 | 2.59  | 2.08 |
| ENSMUSG00000055932 | <i>Fto</i>          | 3.74  | 4.06 | 3.84  | 3.64 |
| ENSMUSG00000055943 | <i>2900064A13Ri</i> | 5.96  | 5.77 | 5.72  | 5.32 |
| ENSMUSG00000055968 | <i>NA</i>           | 0.14  | 2.39 | 1.87  | 1.2  |
| ENSMUSG00000055980 | <i>AK141842</i>     | 1.56  | 2.15 | 1.76  | 1.92 |
| ENSMUSG00000055991 | <i>Zkscan5</i>      | 2.94  | 2.86 | 2.42  | 2.43 |
| ENSMUSG00000056025 | <i>mCLCA1</i>       | 1.18  | 0.59 | 1.55  | 0.54 |
| ENSMUSG00000056032 | <i>NA</i>           | 2.58  | 0.41 | 2.31  | 0.59 |
| ENSMUSG00000056035 | <i>Cyp3a11</i>      | 10.39 | 9.6  | 10.22 | 9.96 |
| ENSMUSG00000056054 | <i>S100a8</i>       | 0.85  | 1.69 | 1.3   | 0.22 |
| ENSMUSG00000056071 | <i>S100a9</i>       | 1.7   | 1.74 | 1.9   | 1.52 |
| ENSMUSG00000056076 | <i>Eif3b</i>        | 5.66  | 5.99 | 5.7   | 5.65 |
| ENSMUSG00000056091 | <i>St3gal5</i>      | 7.89  | 7.58 | 7.54  | 7.43 |
| ENSMUSG00000056116 | <i>H2-T22</i>       | 4.55  | 4.77 | 4.52  | 4.4  |

|                    |                     |        |        |      |       |
|--------------------|---------------------|--------|--------|------|-------|
| ENSMUSG00000056121 | <i>Fez2</i>         | 3.98   | 4.03   | 3.69 | 3.55  |
| ENSMUSG00000056131 | <i>Pgm3</i>         | 2.37   | 1.86   | 1.8  | 1.46  |
| ENSMUSG00000056148 | <i>Rdh9</i>         | 4.87   | 5.06   | 4.88 | 5     |
| ENSMUSG00000056153 | <i>Cis4</i>         | 1.84   | 1.56   | 1.25 | 1.02  |
| ENSMUSG00000056167 | <i>Cnot10</i>       | 2.86   | 2.8    | 2.92 | 2.91  |
| ENSMUSG00000056199 | <i>NA</i>           | 4.25   | 3.55   | 3.15 | 3.67  |
| ENSMUSG00000056201 | <i>Cfl1</i>         | 6.34   | 6.28   | 6.47 | 6.23  |
| ENSMUSG00000056204 | <i>Pgpep1</i>       | 4.65   | 5.02   | 4.88 | 4.64  |
| ENSMUSG00000056209 | <i>Npm3</i>         | 1.06   | 1.15   | 0.92 | 0.62  |
| ENSMUSG00000056211 | <i>R3hdm1</i>       | 2.89   | 2.6    | 2.83 | 2.53  |
| ENSMUSG00000056216 | <i>Cebpg</i>        | 4.59   | 4.62   | 4.13 | 4.54  |
| ENSMUSG00000056228 | <i>NA</i>           | 2.94   | 3.07   | 2.51 | 2.37  |
| ENSMUSG00000056260 | <i>4933421E11Ri</i> | 2.22   | 1.06   | 2.21 | 1.56  |
| ENSMUSG00000056268 | <i>Dennd1b</i>      | 1.31   | 1.05   | 1.44 | 0.51  |
| ENSMUSG00000056305 | <i>Usp39</i>        | 3.92   | 3.85   | 3.97 | 3.94  |
| ENSMUSG00000056310 | <i>Tyw1</i>         | 1.23   | 1.82   | 1.69 | 1.58  |
| ENSMUSG00000056313 | <i>1810011O10Ri</i> | 5.04   | 4.79   | 5.43 | 5.33  |
| ENSMUSG00000056328 | <i>Myh1</i>         | #NAME? | #NAME? | 1.98 | 1.68  |
| ENSMUSG00000056342 | <i>NA</i>           | 3.38   | 2.86   | 2.9  | 2.58  |
| ENSMUSG00000056383 | <i>AI987944</i>     | 2.89   | 1.86   | 2.36 | 2.01  |
| ENSMUSG00000056412 | <i>NA</i>           | 1.65   | 1.42   | 1.81 | 1.9   |
| ENSMUSG00000056429 | <i>Tgoln2</i>       | 6.7    | 6.35   | 6.53 | 6.07  |
| ENSMUSG00000056438 | <i>NA</i>           | 5.45   | 6.14   | 6.07 | 6.06  |
| ENSMUSG00000056487 | <i>LOC554292</i>    | 0.29   | -4.72  | 1.12 | -3.79 |
| ENSMUSG00000056492 | <i>Gpr116</i>       | 3.58   | 3.42   | 3.23 | 3.08  |
| ENSMUSG00000056493 | <i>Foxk1</i>        | 2.6    | 2.73   | 2.73 | 2.55  |
| ENSMUSG00000056501 | <i>Cebpb</i>        | 5.04   | 6.05   | 6.09 | 5.93  |
| ENSMUSG00000056515 | <i>Rab22B</i>       | 1.21   | 0.89   | 0.78 | 0.79  |
| ENSMUSG00000056536 | <i>Pign</i>         | 1.4    | 0.18   | 0.95 | -0.05 |
| ENSMUSG00000056537 | <i>Rnf12</i>        | 3.38   | 2.54   | 2.88 | 2.57  |
| ENSMUSG00000056550 | <i>NA</i>           | 4.39   | 3.87   | 4.6  | 5.85  |



|                    |                     |      |        |       |      |
|--------------------|---------------------|------|--------|-------|------|
| ENSMUSG00000056552 | <i>E130120F12R</i>  | 1.52 | 0.26   | 1.02  | 0.34 |
| ENSMUSG00000056579 | <i>NA</i>           | 3.9  | 3.55   | 3.71  | 3.16 |
| ENSMUSG00000056608 | <i>Chd9</i>         | 2.49 | 1.74   | 2.03  | 1.89 |
| ENSMUSG00000056612 | <i>Ppp1r14b</i>     | 2.16 | 2.85   | 2.64  | 1.96 |
| ENSMUSG00000056629 | <i>Fkbp2</i>        | 6.96 | 6.6    | 6.69  | 6.84 |
| ENSMUSG00000056643 | <i>NA</i>           | 1.3  | 3.18   | 1.8   | 0.64 |
| ENSMUSG00000056652 | <i>NA</i>           | 2.6  | 3.12   | 2.48  | 2.96 |
| ENSMUSG00000056665 | <i>4930572J05Ri</i> | 1.37 | 1.98   | 2.2   | 1.53 |
| ENSMUSG00000056666 | <i>Retsat</i>       | 7.4  | 7.69   | 7.52  | 6.87 |
| ENSMUSG00000056671 | <i>Preli2</i>       | 3.6  | 3.87   | 2.99  | 2.95 |
| ENSMUSG00000056692 | <i>D17Wsu92e</i>    | 6.7  | 7.09   | 6.8   | 6.79 |
| ENSMUSG00000056698 | <i>Rbed1</i>        | 3.95 | 3.66   | 4.38  | 3.63 |
| ENSMUSG00000056708 | <i>Ier5</i>         | 0.72 | 2.37   | 1.33  | 0.96 |
| ENSMUSG00000056718 | <i>NA</i>           | 1.06 | 0.92   | 0.63  | 0.7  |
| ENSMUSG00000056749 | <i>Nfil3</i>        | 5.14 | 5.58   | 3.98  | 3.78 |
| ENSMUSG00000056763 | <i>Csppl</i>        | 1.82 | 1.63   | 1.92  | 1.31 |
| ENSMUSG00000056770 | <i>Setd3</i>        | 3.64 | 2.77   | 3.47  | 3.26 |
| ENSMUSG00000056820 | <i>Tsnax</i>        | 3.83 | 3.57   | 3.53  | 3.32 |
| ENSMUSG00000056851 | <i>hnRNP X</i>      | 7.24 | 7.51   | 7.52  | 7.34 |
| ENSMUSG00000056880 | <i>NA</i>           | 1.56 | 1.11   | 1.8   | 2.93 |
| ENSMUSG00000056888 | <i>Glipr1</i>       | 2.46 | 2.36   | 2.46  | 1.75 |
| ENSMUSG00000056899 | <i>Immp2l</i>       | 5.74 | 5.06   | 5.27  | 4.93 |
| ENSMUSG00000056917 | <i>Sipal</i>        | 1.79 | 2.52   | 1.97  | 1.73 |
| ENSMUSG00000056938 | <i>Acbd4</i>        | 4.16 | 4.69   | 4.34  | 4.12 |
| ENSMUSG00000056941 | <i>Commd7</i>       | 3.56 | 3.81   | 3.19  | 3.43 |
| ENSMUSG00000056951 | <i>Rbm4</i>         | 2.55 | 3.01   | 2.74  | 2.69 |
| ENSMUSG00000056952 | <i>Tatdn2</i>       | 3.53 | 4.11   | 3.7   | 3.62 |
| ENSMUSG00000056962 | <i>mKIAA0585</i>    | 3.05 | 3.64   | 3.43  | 3.5  |
| ENSMUSG00000056973 | <i>Ces3</i>         | 8.38 | 8.52   | 7.9   | 8.02 |
| ENSMUSG00000056978 | <i>Hamp2</i>        | 9.74 | 9.29   | 10.29 | 9.88 |
| ENSMUSG00000056989 | <i>NA</i>           | 1.75 | #NAME? | 2.07  | 1.1  |

|                    |                     |       |       |      |       |
|--------------------|---------------------|-------|-------|------|-------|
| ENSMUSG00000056999 | <i>Ide</i>          | 4.78  | 4.14  | 4.36 | 4.11  |
| ENSMUSG00000057037 | <i>Cfhr1</i>        | 7.05  | 6.21  | 6.64 | 6.15  |
| ENSMUSG00000057054 | <i>AI842396</i>     | 3.29  | 3.06  | 3.45 | 3.07  |
| ENSMUSG00000057068 | <i>Gm1381</i>       | 3.03  | 2.98  | 2.68 | 3.23  |
| ENSMUSG00000057069 | <i>Ero11b</i>       | 2.46  | 2.5   | 2.04 | 2.22  |
| ENSMUSG00000057074 | <i>Ces1</i>         | 6.4   | 5.34  | 5.87 | 5.7   |
| ENSMUSG00000057088 | <i>NA</i>           | 5.79  | 6.11  | 6.01 | 6     |
| ENSMUSG00000057101 | <i>Zfp180</i>       | 3.19  | 3.2   | 3.01 | 3.03  |
| ENSMUSG00000057103 | <i>Cml1</i>         | 6.66  | 7.05  | 6.68 | 6.74  |
| ENSMUSG00000057110 | <i>NA</i>           | 2.38  | 1.55  | 2.08 | 1.28  |
| ENSMUSG00000057113 | <i>Npm1</i>         | 3.89  | 2.78  | 3.51 | 3.29  |
| ENSMUSG00000057130 | <i>Txn14a</i>       | 5.05  | 4.72  | 4.79 | 5.01  |
| ENSMUSG00000057133 | <i>Chd6</i>         | 1.41  | 0.91  | 1.31 | 0.88  |
| ENSMUSG00000057134 | <i>Gm237</i>        | 1.89  | 3.36  | 2.38 | 2.42  |
| ENSMUSG00000057137 | <i>Tmem140</i>      | 4.15  | 4.11  | 4.26 | 3.88  |
| ENSMUSG00000057143 | <i>9230105E10Ri</i> | 1.97  | 0.26  | 0.95 | 0.53  |
| ENSMUSG00000057147 | <i>Atpbd4</i>       | 1.67  | 1.58  | 1.72 | 1.31  |
| ENSMUSG00000057176 | <i>Gm166</i>        | 0.57  | 0.94  | 1.3  | 1.06  |
| ENSMUSG00000057177 | <i>Gsk3a</i>        | 4.61  | 5.3   | 5.36 | 5.15  |
| ENSMUSG00000057181 | <i>5730455P16Ri</i> | 2.24  | 2.37  | 2.17 | 2.33  |
| ENSMUSG00000057191 | <i>AB124611</i>     | 1.75  | 1.37  | 1.46 | 1.26  |
| ENSMUSG00000057193 | <i>Slc44a2</i>      | 2.42  | 2.72  | 2.56 | 2.46  |
| ENSMUSG00000057220 | <i>NA</i>           | -0.27 | -1.39 | 1.98 | -0.23 |
| ENSMUSG00000057228 | <i>Aadat</i>        | 6.77  | 5.54  | 6.54 | 5.77  |
| ENSMUSG00000057229 | <i>2310004L02Ri</i> | 4.94  | 5.11  | 5.66 | 5.31  |
| ENSMUSG00000057234 | <i>Mett5d1</i>      | 1.61  | -0.15 | 1.4  | 0.95  |
| ENSMUSG00000057236 | <i>Rbbp4</i>        | 5.55  | 5.34  | 5.46 | 5.26  |
| ENSMUSG00000057254 | <i>BC066107</i>     | 1.8   | 1.07  | 1.05 | 0.02  |
| ENSMUSG00000057265 | <i>2900006K08Ri</i> | 4.35  | 3.84  | 4.18 | 3.81  |
| ENSMUSG00000057278 | <i>Snrpg</i>        | 0.69  | 0.96  | 1.25 | 1.12  |
| ENSMUSG00000057315 | <i>Arhgap24</i>     | 1.74  | 1     | 1.58 | 1.24  |

|                    |                     |       |       |       |       |
|--------------------|---------------------|-------|-------|-------|-------|
| ENSMUSG00000057322 | <i>Rpl38</i>        | 0.62  | 0.46  | 1.39  | 0.65  |
| ENSMUSG00000057342 | <i>Sphk2</i>        | 4.03  | 4.39  | 4.33  | 3.89  |
| ENSMUSG00000057346 | <i>2310016F22Ri</i> | 5.34  | 5.31  | 5.42  | 5.75  |
| ENSMUSG00000057356 | <i>NA</i>           | 6.2   | 4.85  | 5.4   | 5.8   |
| ENSMUSG00000057363 | <i>Uxs1</i>         | 2.44  | 1.96  | 2.04  | 1.29  |
| ENSMUSG00000057367 | <i>Birc2</i>        | 3.23  | 2.27  | 2.84  | 2.2   |
| ENSMUSG00000057375 | <i>Yipfl</i>        | 4.57  | 5.04  | 4.75  | 5     |
| ENSMUSG00000057388 | <i>Mrpl18</i>       | 4.54  | 4.52  | 4.69  | 4.59  |
| ENSMUSG00000057396 | <i>Zfp759</i>       | 1.75  | 0.99  | 0.75  | -0.48 |
| ENSMUSG00000057400 | <i>Es1</i>          | 10.32 | 10.32 | 10.31 | 10.22 |
| ENSMUSG00000057406 | <i>Whsc1</i>        | 1.04  | 0.77  | 0.65  | 0.4   |
| ENSMUSG00000057409 | <i>KRAZ1</i>        | 1.78  | 1.08  | 1.26  | 0.55  |
| ENSMUSG00000057411 | <i>BC008155</i>     | 4.03  | 4.79  | 4.54  | 4.45  |
| ENSMUSG00000057421 | <i>Las1l</i>        | 3.89  | 4.36  | 4.04  | 3.77  |
| ENSMUSG00000057465 | <i>Saa2</i>         | 4.17  | 4.7   | 5.3   | 5.3   |
| ENSMUSG00000057469 | <i>E2f6</i>         | 3.54  | 3.65  | 3.66  | 3.19  |
| ENSMUSG00000057497 | <i>2010309E21Ri</i> | 4.98  | 4.84  | 4.88  | 4.26  |
| ENSMUSG00000057506 | <i>NA</i>           | 1.06  | 1.02  | 1.02  | 1.11  |
| ENSMUSG00000057522 | <i>Spop</i>         | 6.08  | 5.84  | 5.71  | 5.37  |
| ENSMUSG00000057530 | <i>Ecel</i>         | 6.14  | 6.42  | 6.47  | 6.41  |
| ENSMUSG00000057531 | <i>Dtnbp1</i>       | 4.88  | 5.37  | 5.25  | 4.97  |
| ENSMUSG00000057541 | <i>mKIAA1897</i>    | 1.24  | 1.11  | 1.1   | 1.06  |
| ENSMUSG00000057551 | <i>Zfp75</i>        | 2.65  | 2.34  | 2.33  | 1.97  |
| ENSMUSG00000057554 | <i>Lgals8</i>       | 5.68  | 5.2   | 5.65  | 5.2   |
| ENSMUSG00000057561 | <i>Eif1a</i>        | 5.39  | 5.59  | 4.88  | 4.84  |
| ENSMUSG00000057572 | <i>Zbtb8os</i>      | 1.42  | 0.37  | 0.67  | 0.78  |
| ENSMUSG00000057594 | <i>Arl16</i>        | 1.68  | 2.19  | 1.94  | 1.8   |
| ENSMUSG00000057637 | <i>Prdm2</i>        | 2.99  | 2.58  | 3.11  | 2.94  |
| ENSMUSG00000057649 | <i>Brd9</i>         | 1.82  | 2.36  | 2.49  | 1.98  |
| ENSMUSG00000057667 | <i>Bloc1s3</i>      | 1.77  | 1.7   | 1.37  | 0.93  |
| ENSMUSG00000057672 | <i>Pkn1</i>         | 2.65  | 3.28  | 2.88  | 2.8   |

|                    |                     |      |        |      |        |
|--------------------|---------------------|------|--------|------|--------|
| ENSMUSG00000057691 | <i>NA</i>           | 2.74 | 3.09   | 2.9  | 2.69   |
| ENSMUSG00000057722 | <i>Lepr</i>         | 1.31 | 0.9    | 0.75 | 0.76   |
| ENSMUSG00000057738 | <i>Spna2</i>        | 4    | 4.33   | 4.24 | 3.96   |
| ENSMUSG00000057778 | <i>Cyb5d2</i>       | 3.71 | 3.86   | 3.44 | 3.4    |
| ENSMUSG00000057788 | <i>Ddx49</i>        | 3.48 | 4.24   | 3.48 | 3.59   |
| ENSMUSG00000057789 | <i>Bak1</i>         | 2.52 | 2.73   | 2.87 | 2.62   |
| ENSMUSG00000057796 | <i>NA</i>           | 4.62 | 3.83   | 3.47 | 2.7    |
| ENSMUSG00000057808 | <i>NA</i>           | 1.48 | 0.48   | 1.11 | 1.27   |
| ENSMUSG00000057835 | <i>Zfp119</i>       | 1.57 | 0.29   | 0.43 | 0.13   |
| ENSMUSG00000057841 | <i>Rpl32</i>        | 5.69 | 6.25   | 5.82 | 5.84   |
| ENSMUSG00000057858 | <i>D19Erttd737e</i> | 1.58 | 0.64   | 1.42 | 0.82   |
| ENSMUSG00000057863 | <i>Rpl36</i>        | 0.57 | 1.12   | 1.13 | 1.18   |
| ENSMUSG00000057880 | <i>Abat</i>         | 7.51 | 7.15   | 7.37 | 6.69   |
| ENSMUSG00000057924 | <i>NA</i>           | 2.07 | 0.45   | 1.35 | 0.18   |
| ENSMUSG00000057933 | <i>Gsta2</i>        | 4.2  | 2.83   | 5.03 | 3.56   |
| ENSMUSG00000057963 | <i>Itpk1</i>        | 3.51 | 3.75   | 3.72 | 3.26   |
| ENSMUSG00000057982 | <i>Zfp809</i>       | 3.35 | 2.72   | 3.39 | 2.8    |
| ENSMUSG00000058013 | <i>11-Sep</i>       | 2.58 | 2.52   | 2.32 | 1.75   |
| ENSMUSG00000058022 | <i>9530008L14Ri</i> | 6.5  | 5.54   | 6.06 | 5.68   |
| ENSMUSG00000058056 | <i>Palld</i>        | 2.9  | 3.85   | 3.15 | 3.7    |
| ENSMUSG00000058057 | <i>ENSMUSG000</i>   | 1.77 | #NAME? | 1.79 | #NAME? |
| ENSMUSG00000058064 | <i>NA</i>           | 4.22 | 3.78   | 2.78 | 3.63   |
| ENSMUSG00000058076 | <i>Sdhc</i>         | 7.36 | 7.47   | 7.52 | 7.15   |
| ENSMUSG00000058093 | <i>NA</i>           | 1.48 | 0.38   | 0.81 | -0.01  |
| ENSMUSG00000058099 | <i>Nfam1</i>        | 0.64 | 1.52   | 1.11 | 0.95   |
| ENSMUSG00000058126 | <i>NA</i>           | 2.39 | 0.03   | 2.24 | 0.92   |
| ENSMUSG00000058135 | <i>Gstm1</i>        | 8.53 | 8.96   | 8.97 | 8.87   |
| ENSMUSG00000058140 | <i>NA</i>           | 2.59 | 3.37   | 2.83 | 2.71   |
| ENSMUSG00000058152 | <i>4833446K15Ri</i> | 1.18 | 1.15   | 1.02 | 0.9    |
| ENSMUSG00000058173 | <i>Fn5</i>          | 2.46 | 2.83   | 2.43 | 2.65   |
| ENSMUSG00000058192 | <i>2210010B09Ri</i> | 1.04 | 0.54   | 0.66 | 0.35   |

|                    |                     |       |       |       |       |
|--------------------|---------------------|-------|-------|-------|-------|
| ENSMUSG00000058207 | <i>Serpina3k</i>    | 11.17 | 11.28 | 11.09 | 11.5  |
| ENSMUSG00000058216 | <i>BC021614</i>     | 4.64  | 4.95  | 5.37  | 5.01  |
| ENSMUSG00000058230 | <i>Grfl1</i>        | 4.49  | 4.7   | 4.46  | 4.38  |
| ENSMUSG00000058239 | <i>Usf2</i>         | 4.74  | 5.01  | 4.49  | 4.47  |
| ENSMUSG00000058240 | <i>Cryzll</i>       | 2.84  | 2.97  | 2.28  | 2.55  |
| ENSMUSG00000058254 | <i>Tspan7</i>       | 2.67  | 2.81  | 2.19  | 2.44  |
| ENSMUSG00000058258 | <i>Idi1</i>         | 1.87  | 0.85  | 0.24  | -0.48 |
| ENSMUSG00000058267 | <i>Mrps14</i>       | 4.33  | 3.73  | 3.95  | 3.53  |
| ENSMUSG00000058291 | <i>Zfp68</i>        | 2.94  | 2.46  | 2.68  | 2.11  |
| ENSMUSG00000058301 | <i>Upfl</i>         | 3.9   | 4.62  | 4.41  | 4.35  |
| ENSMUSG00000058317 | <i>Ube2e2</i>       | 4.04  | 4.05  | 3.73  | 3.41  |
| ENSMUSG00000058318 | <i>Phf21a</i>       | 1.61  | 1.61  | 1.72  | 1.47  |
| ENSMUSG00000058325 | <i>Dock1</i>        | 2.01  | 2.15  | 1.85  | 1.76  |
| ENSMUSG00000058351 | <i>NA</i>           | 2.61  | 3.68  | 3.89  | 3.43  |
| ENSMUSG00000058355 | <i>Abcel</i>        | 5.14  | 4.74  | 4.82  | 4.47  |
| ENSMUSG00000058357 | <i>NA</i>           | 4.73  | 4.13  | 4.49  | 6.51  |
| ENSMUSG00000058388 | <i>Phtfl</i>        | 1.5   | 1.03  | 0.83  | 1.14  |
| ENSMUSG00000058392 | <i>Rrp1b</i>        | 1.01  | 1.19  | 0.77  | 1.02  |
| ENSMUSG00000058396 | <i>Admr</i>         | 4.79  | 5.51  | 4.49  | 4.68  |
| ENSMUSG00000058407 | <i>Txndc9</i>       | 4.25  | 3.87  | 4.34  | 3.66  |
| ENSMUSG00000058440 | <i>Nrf1</i>         | 1.13  | 1.62  | 1.23  | 1.19  |
| ENSMUSG00000058443 | <i>NA</i>           | 0.63  | 1.3   | 1.7   | 1.3   |
| ENSMUSG00000058444 | <i>Map2k5</i>       | 3.22  | 3.27  | 3.68  | 3.23  |
| ENSMUSG00000058446 | <i>Znrf2</i>        | 4.77  | 3.75  | 4.29  | 3.99  |
| ENSMUSG00000058454 | <i>Dhcr7</i>        | 5.92  | 5.83  | 5.49  | 5.07  |
| ENSMUSG00000058486 | <i>Wdr91</i>        | 2.83  | 3.34  | 2.77  | 2.27  |
| ENSMUSG00000058492 | <i>NA</i>           | 7.99  | 7.47  | 7.61  | 8.68  |
| ENSMUSG00000058503 | <i>5830415L20Ri</i> | 2.5   | 1.56  | 2.05  | 1.85  |
| ENSMUSG00000058523 | <i>Mup5</i>         | 2.58  | -0.32 | -1.12 | 1.66  |
| ENSMUSG00000058542 | <i>NA</i>           | 1.06  | 1.35  | 0.62  | 0.88  |
| ENSMUSG00000058546 | <i>Rpl23a</i>       | 2.24  | 2.46  | 2.57  | 2.34  |

|                    |                      |      |       |      |      |
|--------------------|----------------------|------|-------|------|------|
| ENSMUSG00000058569 | <i>Tmed9</i>         | 5.34 | 5.63  | 5    | 5.26 |
| ENSMUSG00000058586 | <i>Serhl</i>         | 3.99 | 4.15  | 4.06 | 3.99 |
| ENSMUSG00000058587 | <i>Tmod3</i>         | 3.92 | 3.14  | 3.45 | 3.1  |
| ENSMUSG00000058594 | <i>Fbxo18</i>        | 3.49 | 3.41  | 3.49 | 2.98 |
| ENSMUSG00000058600 | <i>Rpl30</i>         | 1.46 | 1.05  | 1.81 | 1.28 |
| ENSMUSG00000058603 | <i>NA</i>            | 0.87 | 1.45  | 1.5  | 0.97 |
| ENSMUSG00000058624 | <i>Gda</i>           | 3.78 | 2.59  | 3.08 | 2.44 |
| ENSMUSG00000058638 | <i>Zfp110</i>        | 3.7  | 2.92  | 3.16 | 3.08 |
| ENSMUSG00000058655 | <i>Eif4b</i>         | 6.04 | 6.62  | 6.29 | 6.29 |
| ENSMUSG00000058672 | <i>Tubb2a</i>        | 5.77 | 6.4   | 4.22 | 4.5  |
| ENSMUSG00000058690 | <i>mKIAA1128</i>     | 3.44 | 2.7   | 3.27 | 2.91 |
| ENSMUSG00000058704 | <i>Memo1</i>         | 4.5  | 3.55  | 3.49 | 3.69 |
| ENSMUSG00000058706 | <i>NA</i>            | 4.12 | 3.95  | 4.02 | 3.79 |
| ENSMUSG00000058709 | <i>Egln2</i>         | 4.55 | 5.64  | 4.91 | 4.91 |
| ENSMUSG00000058715 | <i>Fcer1g</i>        | 4.14 | 3.09  | 3.72 | 3.3  |
| ENSMUSG00000058748 | <i>BC003267</i>      | 1.86 | 0.8   | 0.67 | 0.34 |
| ENSMUSG00000058756 | <i>Thra</i>          | 3.15 | 4.14  | 3.76 | 3.73 |
| ENSMUSG00000058761 | <i>NA</i>            | 3.85 | 3.21  | 3.92 | 3.74 |
| ENSMUSG00000058793 | <i>Cds2</i>          | 4.15 | 4.54  | 4    | 4.18 |
| ENSMUSG00000058799 | <i>Nap11l</i>        | 2.9  | 2.68  | 2.57 | 1.9  |
| ENSMUSG00000058812 | <i>NA</i>            | 1.65 | 1.66  | 2.28 | 2.13 |
| ENSMUSG00000058833 | <i>2810428115Rik</i> | 4.52 | 5.55  | 5.14 | 4.87 |
| ENSMUSG00000058835 | <i>Abil</i>          | 4.51 | 4.34  | 4.51 | 4.14 |
| ENSMUSG00000058886 | <i>Deaf1</i>         | 2.8  | 3.4   | 3.34 | 3.13 |
| ENSMUSG00000058905 | <i>NA</i>            | 0.58 | -0.04 | 1.23 | 0.61 |
| ENSMUSG00000058921 | <i>Slc10a5</i>       | 4.22 | 3.79  | 3.73 | 3.75 |
| ENSMUSG00000058927 | <i>NA</i>            | 2.44 | 2.35  | 3.03 | 3.33 |
| ENSMUSG00000058942 | <i>NA</i>            | 1.02 | 0.23  | 0.96 | 0.55 |
| ENSMUSG00000058952 | <i>Cfi</i>           | 8.49 | 8.53  | 8.35 | 8.37 |
| ENSMUSG00000058979 | <i>Cecr5</i>         | 3.62 | 4.2   | 3.91 | 3.66 |
| ENSMUSG00000058997 | <i>NA</i>            | 5.46 | 4.6   | 5.35 | 4.47 |

|                    |                     |      |       |      |      |
|--------------------|---------------------|------|-------|------|------|
| ENSMUSG00000059005 | <i>Hnrpa3</i>       | 1.74 | 1.52  | 0.88 | 0.82 |
| ENSMUSG00000059013 | <i>Sh2d3c</i>       | 1.59 | 2.62  | 1.99 | 1.64 |
| ENSMUSG00000059027 | <i>NA</i>           | 2.01 | 0.93  | 2.01 | 1.14 |
| ENSMUSG00000059039 | <i>NA</i>           | 0.09 | 2.29  | 1.24 | 1.68 |
| ENSMUSG00000059040 | <i>EG433182</i>     | 1.59 | 2.81  | 1.69 | 1.83 |
| ENSMUSG00000059070 | <i>Rpl18</i>        | 0.68 | 2.3   | 1.97 | 1.11 |
| ENSMUSG00000059089 | <i>Fcgr4</i>        | 3.09 | 1.74  | 2.09 | 2.81 |
| ENSMUSG00000059119 | <i>Nap114</i>       | 4.56 | 4.83  | 4.56 | 4.33 |
| ENSMUSG00000059142 | <i>A630033E08R1</i> | 1.6  | -0.08 | 0.57 | 0.19 |
| ENSMUSG00000059144 | <i>NA</i>           | 1.09 | 1.84  | 1.85 | 1.84 |
| ENSMUSG00000059149 | <i>Mfsd4</i>        | 2.06 | 1.76  | 2.25 | 1.7  |
| ENSMUSG00000059182 | <i>Skap2</i>        | 3.67 | 3.15  | 3.4  | 2.92 |
| ENSMUSG00000059183 | <i>Mtfmt</i>        | 1.8  | 1.63  | 2.05 | 1.23 |
| ENSMUSG00000059208 | <i>Hnrpm</i>        | 4.92 | 5.15  | 4.88 | 4.75 |
| ENSMUSG00000059248 | <i>9-Sep</i>        | 5.15 | 4.93  | 5.08 | 4.55 |
| ENSMUSG00000059249 | <i>NA</i>           | 3.02 | 2.47  | 3.85 | 2.53 |
| ENSMUSG00000059263 | <i>Usp47</i>        | 4.76 | 4.62  | 4.74 | 4.35 |
| ENSMUSG00000059273 | <i>mKIAA1064</i>    | 2.36 | 3     | 3.09 | 2.86 |
| ENSMUSG00000059277 | <i>R74862</i>       | 1.03 | 1.03  | 1.08 | 0.29 |
| ENSMUSG00000059278 | <i>Lsmd1</i>        | 4.86 | 5.47  | 4.98 | 5.42 |
| ENSMUSG00000059288 | <i>Cdyl</i>         | 1.4  | 0.91  | 1.23 | 1.13 |
| ENSMUSG00000059316 | <i>Slc27a4</i>      | 3.85 | 4.53  | 4.07 | 4.1  |
| ENSMUSG00000059325 | <i>Hopx</i>         | 4.9  | 4.16  | 5.03 | 4.77 |
| ENSMUSG00000059326 | <i>Csf2ra</i>       | 0.27 | 1.11  | 1.14 | 0.57 |
| ENSMUSG00000059355 | <i>BC056474</i>     | 3.3  | 4.12  | 4.06 | 3.78 |
| ENSMUSG00000059363 | <i>Fxn</i>          | 2.97 | 3.8   | 3.69 | 3.71 |
| ENSMUSG00000059409 | <i>Ppp2r5d</i>      | 4.17 | 4.55  | 4.35 | 4.37 |
| ENSMUSG00000059423 | <i>MGC67181</i>     | 1.66 | 1.02  | 0.58 | 0.13 |
| ENSMUSG00000059434 | <i>Gckr</i>         | 6.27 | 5.96  | 6.36 | 5.99 |
| ENSMUSG00000059436 | <i>Myn</i>          | 4.24 | 3.49  | 4.09 | 4.09 |
| ENSMUSG00000059439 | <i>Bcas3</i>        | 2.39 | 3.04  | 3.05 | 2.85 |

|                    |                     |      |       |       |       |
|--------------------|---------------------|------|-------|-------|-------|
| ENSMUSG00000059447 | <i>Hadhb</i>        | 3.31 | 2.74  | 3.23  | 2.36  |
| ENSMUSG00000059456 | <i>Ptk2b</i>        | 3.72 | 3.46  | 4.26  | 3.72  |
| ENSMUSG00000059474 | <i>Mbtd1</i>        | 2.2  | 0.85  | 1.76  | 1.19  |
| ENSMUSG00000059475 | <i>Zfp426</i>       | 2.06 | 1.64  | 2.1   | 1.6   |
| ENSMUSG00000059479 | <i>B3gnt8</i>       | 4.86 | 5.58  | 5.21  | 4.87  |
| ENSMUSG00000059481 | <i>Plg</i>          | 9.85 | 10.47 | 10.14 | 10.12 |
| ENSMUSG00000059482 | <i>2610301B20Ri</i> | 2.27 | 1.72  | 1.72  | 1.2   |
| ENSMUSG00000059486 | <i>Kbtbd2</i>       | 3.05 | 2.04  | 2.8   | 2.61  |
| ENSMUSG00000059495 | <i>Arhgef12</i>     | 4.44 | 4.07  | 4.27  | 4.12  |
| ENSMUSG00000059498 | <i>Fcgr3</i>        | 3.02 | 2.2   | 3.1   | 2.63  |
| ENSMUSG00000059518 | <i>Znhit1</i>       | 4.29 | 4.89  | 4.9   | 4.75  |
| ENSMUSG00000059534 | <i>1110020P15Ri</i> | 6.71 | 6.42  | 7.1   | 7.34  |
| ENSMUSG00000059552 | <i>p53</i>          | 3.64 | 4.08  | 3.92  | 3.7   |
| ENSMUSG00000059554 | <i>Ccdc28a</i>      | 2.68 | 2.12  | 3.22  | 2.89  |
| ENSMUSG00000059555 | <i>A830007P12Ri</i> | 1.71 | 1.94  | 1.63  | 1     |
| ENSMUSG00000059586 | <i>Nsmce2</i>       | 2.85 | 2.37  | 2.52  | 2.39  |
| ENSMUSG00000059588 | <i>Calcr1</i>       | 3.1  | 2.18  | 2.36  | 2.14  |
| ENSMUSG00000059605 | <i>NA</i>           | 1.37 | 0.65  | 1.12  | 0.45  |
| ENSMUSG00000059634 | <i>NA</i>           | 5.39 | 6.12  | 6.15  | 6.12  |
| ENSMUSG00000059669 | <i>Taf1b</i>        | 1.91 | 1.44  | 1.47  | 1     |
| ENSMUSG00000059689 | <i>Zfp637</i>       | 3.76 | 4.06  | 3.84  | 3.72  |
| ENSMUSG00000059708 | <i>Sfrs17b</i>      | 1.19 | 0.88  | 0.35  | 0.35  |
| ENSMUSG00000059714 | <i>Flot1</i>        | 3.41 | 4.23  | 3.62  | 3.51  |
| ENSMUSG00000059734 | <i>Ndufs8</i>       | 6.66 | 7.07  | 7.07  | 6.56  |
| ENSMUSG00000059743 | <i>Fdps</i>         | 4.2  | 4.08  | 3.18  | 2.47  |
| ENSMUSG00000059751 | <i>NA</i>           | 2.99 | 4.06  | 3.88  | 4.38  |
| ENSMUSG00000059772 | <i>Giyd2</i>        | 1.86 | 2.35  | 2.38  | 2.31  |
| ENSMUSG00000059775 | <i>NA</i>           | 0.6  | 1.04  | 1.07  | 1.56  |
| ENSMUSG00000059796 | <i>Eif4a1</i>       | 4.23 | 3.74  | 3.95  | 3.73  |
| ENSMUSG00000059807 | <i>NA</i>           | 6.9  | 6.8   | 6.23  | 5.92  |
| ENSMUSG00000059811 | <i>Arl6ip2</i>      | 6.48 | 5.75  | 6.15  | 5.85  |



|                    |                     |      |      |      |      |
|--------------------|---------------------|------|------|------|------|
| ENSMUSG00000059820 | <i>AU019823</i>     | 3.27 | 2.24 | 2.56 | 2.04 |
| ENSMUSG00000059824 | <i>Dbp</i>          | 1.22 | 0.62 | 4.95 | 5.29 |
| ENSMUSG00000059834 | <i>Sc11</i>         | 1.1  | 0.53 | 1.21 | 0.27 |
| ENSMUSG00000059839 | <i>9630025I21Ri</i> | 2.31 | 1.83 | 1.87 | 1.24 |
| ENSMUSG00000059851 | <i>Suv420h2</i>     | 2.1  | 2.65 | 2.24 | 2.11 |
| ENSMUSG00000059866 | <i>Tnip2</i>        | 0.86 | 0.8  | 1.19 | 0.91 |
| ENSMUSG00000059878 | <i>Zfp422</i>       | 2.79 | 2.74 | 2.93 | 2.54 |
| ENSMUSG00000059883 | <i>Irak4</i>        | 1.36 | 1.76 | 1.41 | 1.57 |
| ENSMUSG00000059890 | <i>Ube4a</i>        | 4.92 | 4.24 | 4.52 | 4.13 |
| ENSMUSG00000059895 | <i>Ptp4a3</i>       | 1.24 | 2.72 | 1.98 | 2.38 |
| ENSMUSG00000059897 | <i>D10627</i>       | 1.97 | 0.27 | 1.04 | 0.18 |
| ENSMUSG00000059908 | <i>Mug1</i>         | 8.6  | 9.03 | 8.93 | 9.04 |
| ENSMUSG00000059920 | <i>4930453N24Ri</i> | 3.96 | 2.37 | 3.31 | 2.91 |
| ENSMUSG00000059923 | <i>Grb2</i>         | 4.41 | 4.38 | 4.43 | 4.2  |
| ENSMUSG00000059939 | <i>9430015G10Ri</i> | 1.33 | 1.54 | 1.12 | 1.55 |
| ENSMUSG00000059981 | <i>NA</i>           | 2.96 | 3.52 | 3.11 | 3.01 |
| ENSMUSG00000059995 | <i>Atxn7l3</i>      | 3.55 | 3.77 | 3.44 | 3.31 |
| ENSMUSG00000060002 | <i>Chpt1</i>        | 5.01 | 3.94 | 4.76 | 3.98 |
| ENSMUSG00000060012 | <i>Kif13b</i>       | 2.64 | 3    | 2.95 | 2.76 |
| ENSMUSG00000060029 | <i>NA</i>           | 2.44 | 1.81 | 2.2  | 1.65 |
| ENSMUSG00000060032 | <i>H2aff</i>        | 4.61 | 5.68 | 5.49 | 5.47 |
| ENSMUSG00000060036 | <i>Rpl3</i>         | 1.85 | 3.22 | 1.74 | 2.1  |
| ENSMUSG00000060038 | <i>Dhps</i>         | 2.32 | 2.9  | 2.67 | 2.58 |
| ENSMUSG00000060063 | <i>Alox5ap</i>      | 2.49 | 2.49 | 2.43 | 1.71 |
| ENSMUSG00000060068 | <i>NA</i>           | 1.26 | 1.1  | 1.8  | 1.46 |
| ENSMUSG00000060090 | <i>Rp2h</i>         | 1.94 | 0.84 | 1.22 | 0.75 |
| ENSMUSG00000060098 | <i>mKIAA1933</i>    | 2.52 | 3.19 | 2.94 | 2.66 |
| ENSMUSG00000060121 | <i>Sip1</i>         | 3.44 | 3.11 | 3.55 | 3.14 |
| ENSMUSG00000060126 | <i>Tpt1</i>         | 3.51 | 5.05 | 4.56 | 3.96 |
| ENSMUSG00000060147 | <i>Serpinb6a</i>    | 3.66 | 2.98 | 3.26 | 3.23 |
| ENSMUSG00000060149 | <i>BC002059</i>     | 2.16 | 0.34 | 1.83 | 0.76 |

|                    |                     |      |      |      |       |
|--------------------|---------------------|------|------|------|-------|
| ENSMUSG00000060152 | <i>Pop5</i>         | 4.38 | 4.82 | 4.75 | 4.76  |
| ENSMUSG00000060166 | <i>Zdhhc8</i>       | 0.88 | 1.86 | 1.85 | 1.58  |
| ENSMUSG00000060177 | <i>Klk1b22</i>      | 1.09 | 0.16 | 1.52 | -0.91 |
| ENSMUSG00000060181 | <i>Slc35e3</i>      | 1.6  | 1.29 | 1.37 | 1.06  |
| ENSMUSG00000060216 | <i>Arrb2</i>        | 2.43 | 3.32 | 2.93 | 2.92  |
| ENSMUSG00000060224 | <i>4833409A17Ri</i> | 3.97 | 3.94 | 4.44 | 3.85  |
| ENSMUSG00000060244 | <i>Refbp2</i>       | 1    | 1.35 | 1.33 | 0.42  |
| ENSMUSG00000060261 | <i>Diws1t</i>       | 5.03 | 5.35 | 5.16 | 4.99  |
| ENSMUSG00000060279 | <i>Ap2a1</i>        | 3.58 | 4.4  | 4.06 | 4.09  |
| ENSMUSG00000060301 | <i>2610008E11Ri</i> | 2.17 | 1.45 | 1.45 | 0.83  |
| ENSMUSG00000060317 | <i>C730036D15R</i>  | 6.65 | 6.5  | 5.93 | 6.1   |
| ENSMUSG00000060373 | <i>Hnrnpc</i>       | 4.99 | 4.29 | 4.65 | 4.62  |
| ENSMUSG00000060376 | <i>Bckdha</i>       | 6.97 | 7.69 | 7.38 | 7.11  |
| ENSMUSG00000060407 | <i>Cyp2a12</i>      | 8.48 | 8.5  | 8.59 | 8.41  |
| ENSMUSG00000060419 | <i>NA</i>           | 3.47 | 2.31 | 2.97 | 3.88  |
| ENSMUSG00000060427 | <i>AI449175</i>     | 2.72 | 2.48 | 2.46 | 2.08  |
| ENSMUSG00000060429 | <i>Sntb1</i>        | 4.05 | 4.21 | 3.87 | 3.79  |
| ENSMUSG00000060438 | <i>NA</i>           | 0.43 | 1.4  | 1.11 | 1.88  |
| ENSMUSG00000060450 | <i>Triad2</i>       | 5.18 | 5.01 | 5.34 | 4.82  |
| ENSMUSG00000060459 | <i>Kng2</i>         | 7.12 | 6.68 | 6.79 | 6.54  |
| ENSMUSG00000060466 | <i>NA</i>           | 1.57 | 0.86 | 1.77 | 1.35  |
| ENSMUSG00000060470 | <i>Gpr97</i>        | 1.55 | 1.74 | 0.78 | 1.24  |
| ENSMUSG00000060475 | <i>Wtap</i>         | 3.03 | 2.51 | 2.58 | 2.45  |
| ENSMUSG00000060477 | <i>Irak2</i>        | 2.64 | 2.83 | 2.66 | 2.55  |
| ENSMUSG00000060510 | <i>NA</i>           | 2.47 | 1.22 | 2.04 | 1.69  |
| ENSMUSG00000060512 | <i>0610040J01Ri</i> | 4.22 | 4.62 | 4.67 | 4.65  |
| ENSMUSG00000060519 | <i>Tor3a</i>        | 2.73 | 2.83 | 2.08 | 1.66  |
| ENSMUSG00000060538 | <i>I110032O16Ri</i> | 4.1  | 4.65 | 4.6  | 4.65  |
| ENSMUSG00000060550 | <i>H2-Q7</i>        | 2.57 | 3.19 | 2.72 | 2.55  |
| ENSMUSG00000060579 | <i>Fhit</i>         | 2.31 | 2.61 | 2.63 | 2.35  |
| ENSMUSG00000060586 | <i>H2-Eb1</i>       | 5.4  | 4.85 | 5.39 | 4.73  |

|                    |                     |       |       |      |       |
|--------------------|---------------------|-------|-------|------|-------|
| ENSMUSG00000060591 | <i>Ifitm2</i>       | 7.19  | 7.8   | 7.85 | 7.56  |
| ENSMUSG00000060600 | <i>ENO3</i>         | 0.18  | 0.99  | 1.53 | 1.79  |
| ENSMUSG00000060601 | <i>Nr1h2</i>        | 4.49  | 5.25  | 4.76 | 4.72  |
| ENSMUSG00000060613 | <i>Cyp2c70</i>      | 9.42  | 8.96  | 9.14 | 8.74  |
| ENSMUSG00000060628 | <i>NA</i>           | 6.39  | 4.58  | 5.71 | 5.11  |
| ENSMUSG00000060636 | <i>Rpl35a</i>       | 3.39  | 3.23  | 3.31 | 2.94  |
| ENSMUSG00000060639 | <i>Hist1h4i</i>     | 2.37  | 2.38  | 2.66 | 2.42  |
| ENSMUSG00000060647 | <i>NA</i>           | 2.23  | 1.99  | 1.99 | 1.65  |
| ENSMUSG00000060657 | <i>4921513D23Ri</i> | 4.18  | 3.71  | 3.9  | 3.72  |
| ENSMUSG00000060675 | <i>Hrasls3</i>      | 1.68  | 1.46  | 1.25 | 1.36  |
| ENSMUSG00000060679 | <i>Mrps9</i>        | 4.1   | 3.83  | 4.22 | 3.56  |
| ENSMUSG00000060681 | <i>mKIAA0267</i>    | 2.11  | 1.57  | 1.62 | 1.11  |
| ENSMUSG00000060703 | <i>Cd302</i>        | 8.03  | 7.93  | 7.9  | 7.56  |
| ENSMUSG00000060708 | <i>Cno</i>          | 2.67  | 3.62  | 2.26 | 2.7   |
| ENSMUSG00000060730 | <i>NA</i>           | 1.43  | 1.28  | 0.88 | 1.29  |
| ENSMUSG00000060733 | <i>Ipmk</i>         | 4.71  | 3.95  | 4.44 | 4.15  |
| ENSMUSG00000060739 | <i>5730427N09Ri</i> | 2.92  | 2.74  | 2.34 | 1.17  |
| ENSMUSG00000060743 | <i>H3f3a</i>        | 3.38  | 1.47  | 3.12 | 2.89  |
| ENSMUSG00000060802 | <i>B2m</i>          | 10.75 | 9.85  | 10.7 | 10.68 |
| ENSMUSG00000060803 | <i>Gstp1</i>        | 4.66  | 5.94  | 5.6  | 5.95  |
| ENSMUSG00000060807 | <i>Serpina6</i>     | 8.56  | 8.41  | 8.51 | 8.46  |
| ENSMUSG00000060814 | <i>NA</i>           | 1.55  | 2.88  | 1.88 | 1.26  |
| ENSMUSG00000060862 | <i>Zbtb40</i>       | 1.76  | 2.16  | 1.55 | 1.5   |
| ENSMUSG00000060904 | <i>Arl1</i>         | 4.97  | 4.25  | 4.35 | 4.19  |
| ENSMUSG00000060923 | <i>Acyp2</i>        | 1.31  | -0.38 | 0.37 | 1.27  |
| ENSMUSG00000060935 | <i>AI597468</i>     | 3.06  | 1.67  | 1.87 | 1.21  |
| ENSMUSG00000060938 | <i>Rpl26</i>        | 4.07  | 4.54  | 3.87 | 3.57  |
| ENSMUSG00000060950 | <i>6720458F09Ri</i> | 0.84  | 2.47  | 1.25 | 1.44  |
| ENSMUSG00000060961 | <i>Slc4a4</i>       | 3.85  | 3.95  | 3.66 | 3.33  |
| ENSMUSG00000060981 | <i>Hist1h4h</i>     | 2.23  | 2.05  | 3.28 | 3.35  |
| ENSMUSG00000060992 | <i>Copz1</i>        | 6.97  | 7.14  | 6.77 | 6.56  |

|                    |                     |      |      |      |      |
|--------------------|---------------------|------|------|------|------|
| ENSMUSG00000061024 | <i>Rrs1</i>         | 3.16 | 2.88 | 2.78 | 2.97 |
| ENSMUSG00000061028 | <i>Sfrs16</i>       | 1.03 | 1.96 | 1.32 | 1.02 |
| ENSMUSG00000061032 | <i>Rrp1</i>         | 5.16 | 5.51 | 5.24 | 4.85 |
| ENSMUSG00000061046 | <i>Haghl</i>        | 0.37 | 2.04 | 1.77 | 1.36 |
| ENSMUSG00000061079 | <i>Zfp143</i>       | 1.62 | 1.7  | 1.34 | 1.39 |
| ENSMUSG00000061111 | <i>BC003940</i>     | 3.15 | 4.07 | 3.58 | 3.72 |
| ENSMUSG00000061118 | <i>Wbscr18</i>      | 4.44 | 4.77 | 4.6  | 4.35 |
| ENSMUSG00000061119 | <i>Prcp</i>         | 2.26 | 2.12 | 2.27 | 2.19 |
| ENSMUSG00000061130 | <i>Ppm1b</i>        | 3.9  | 3.6  | 3.52 | 3.37 |
| ENSMUSG00000061136 | <i>Prpf40a</i>      | 4.24 | 3.25 | 3.84 | 3.32 |
| ENSMUSG00000061175 | <i>NA</i>           | 2.7  | 2.32 | 3.94 | 3.42 |
| ENSMUSG00000061207 | <i>Stk19</i>        | 0.92 | 1.85 | 1.51 | 1.95 |
| ENSMUSG00000061232 | <i>H2-K1</i>        | 9.09 | 9.33 | 9.2  | 8.97 |
| ENSMUSG00000061244 | <i>Exoc5</i>        | 3.52 | 2.18 | 2.73 | 2.38 |
| ENSMUSG00000061273 | <i>Tmem32</i>       | 4.06 | 3.15 | 3.51 | 2.98 |
| ENSMUSG00000061286 | <i>Exosc5</i>       | 4.27 | 5    | 4.76 | 4.56 |
| ENSMUSG00000061288 | <i>Taok3</i>        | 4.09 | 4.07 | 4.36 | 4.1  |
| ENSMUSG00000061292 | <i>NA</i>           | 4.54 | 3.93 | 4.84 | 4.66 |
| ENSMUSG00000061306 | <i>I810073N04Ri</i> | 4.85 | 5.57 | 4.9  | 4.85 |
| ENSMUSG00000061313 | <i>NA</i>           | 2.85 | 2.07 | 2.96 | 2.67 |
| ENSMUSG00000061353 | <i>Cxcl12</i>       | 5.73 | 5.38 | 5.47 | 5.36 |
| ENSMUSG00000061360 | <i>Phf5a</i>        | 4.86 | 5.45 | 5.22 | 5.16 |
| ENSMUSG00000061374 | <i>Fiz1</i>         | 3.53 | 3.68 | 3.69 | 3.7  |
| ENSMUSG00000061410 | <i>Zcchc14</i>      | 3.2  | 3.36 | 3.55 | 3.35 |
| ENSMUSG00000061436 | <i>Hipk2</i>        | 2.72 | 2.61 | 2.83 | 2.85 |
| ENSMUSG00000061455 | <i>Stx17</i>        | 2.98 | 2.43 | 2.73 | 2.51 |
| ENSMUSG00000061458 | <i>Nol10</i>        | 1.58 | 1.92 | 1.83 | 1.58 |
| ENSMUSG00000061461 | <i>NA</i>           | 2.04 | 1.65 | 2.18 | 2.18 |
| ENSMUSG00000061474 | <i>Mrps36</i>       | 0.95 | 0.83 | 2.1  | 2.92 |
| ENSMUSG00000061477 | <i>Rps7</i>         | 2.54 | 2.94 | 3.28 | 2.58 |
| ENSMUSG00000061479 | <i>Snrpa</i>        | 3.24 | 3.42 | 3.71 | 3.72 |

|                    |                     |        |        |       |       |
|--------------------|---------------------|--------|--------|-------|-------|
| ENSMUSG00000061518 | <i>LOC10004034</i>  | 5.48   | 6.04   | 6.3   | 5.9   |
| ENSMUSG00000061536 | <i>Sec22c</i>       | 1.89   | 1.25   | 2.43  | 1.78  |
| ENSMUSG00000061540 | <i>Orm2</i>         | 5.04   | 5.39   | 5.77  | 5.11  |
| ENSMUSG00000061555 | <i>Vamp5</i>        | 1.18   | 1.62   | 1.56  | 1.58  |
| ENSMUSG00000061559 | <i>Wdr61</i>        | 4.21   | 3.22   | 3.77  | 3.58  |
| ENSMUSG00000061589 | <i>Dot1l</i>        | 2      | 2.46   | 2.09  | 1.82  |
| ENSMUSG00000061607 | <i>Mdc1</i>         | 1.53   | 1.18   | 1.75  | 1.22  |
| ENSMUSG00000061631 | <i>NA</i>           | 0.61   | 1.15   | 1.71  | 3.21  |
| ENSMUSG00000061650 | <i>Med9</i>         | 3.05   | 3.5    | 3.26  | 3.65  |
| ENSMUSG00000061665 | <i>Cd2ap</i>        | 3.4    | 2.31   | 3.17  | 2.75  |
| ENSMUSG00000061689 | <i>Dlgap4</i>       | 1.55   | 1.77   | 1.58  | 1.69  |
| ENSMUSG00000061723 | <i>Tnnt3</i>        | #NAME? | #NAME? | 3.26  | 3.49  |
| ENSMUSG00000061731 | <i>Ext1</i>         | 2.9    | 2.79   | 3.06  | 2.64  |
| ENSMUSG00000061740 | <i>Cyp2d22</i>      | 6.75   | 7.47   | 7.1   | 7.38  |
| ENSMUSG00000061751 | <i>NA</i>           | 1.36   | 1.09   | 2.13  | 1.75  |
| ENSMUSG00000061755 | <i>A230054D04R</i>  | 2.27   | 1.82   | 1.9   | 1.44  |
| ENSMUSG00000061759 | <i>I700052N19Ri</i> | 2.41   | 2.45   | 2.5   | 2.33  |
| ENSMUSG00000061778 | <i>Mospd2</i>       | 4.1    | 3.35   | 4.1   | 3.28  |
| ENSMUSG00000061808 | <i>Ttr</i>          | 11.99  | 12.73  | 12.83 | 12.28 |
| ENSMUSG00000061825 | <i>Ces2</i>         | 2.04   | -0.03  | 1.8   | 0.5   |
| ENSMUSG00000061838 | <i>Suclg2</i>       | 5.51   | 4.93   | 5.42  | 4.5   |
| ENSMUSG00000061859 | <i>Inadl</i>        | 1.41   | 1.54   | 1.42  | 1.04  |
| ENSMUSG00000061887 | <i>Ssbp3</i>        | 3.71   | 4      | 4.6   | 4.28  |
| ENSMUSG00000061898 | <i>Rbak</i>         | 0.91   | 0.45   | 1.03  | 0.49  |
| ENSMUSG00000061904 | <i>Slc25a3</i>      | 8.17   | 8.02   | 8.03  | 7.64  |
| ENSMUSG00000061947 | <i>Serpina10</i>    | 7.5    | 7.59   | 7.2   | 7.34  |
| ENSMUSG00000061950 | <i>Ppp4r1</i>       | 3.53   | 3.66   | 3.41  | 3.34  |
| ENSMUSG00000061959 | <i>Es22</i>         | 6.59   | 6.31   | 6.59  | 6.32  |
| ENSMUSG00000061979 | <i>Wbscr16</i>      | 2.9    | 3.52   | 3.24  | 2.96  |
| ENSMUSG00000061981 | <i>Flot2</i>        | 4.79   | 5.36   | 4.57  | 4.51  |
| ENSMUSG00000061983 | <i>Rps12</i>        | 0.26   | 1.38   | 1.73  | 1.42  |

|                    |                    |      |      |      |       |
|--------------------|--------------------|------|------|------|-------|
| ENSMUSG00000062006 | <i>Rpl34</i>       | 1.91 | 0.7  | 2.24 | 1.96  |
| ENSMUSG00000062014 | <i>Gmfb</i>        | 4.23 | 3.05 | 3.7  | 2.81  |
| ENSMUSG00000062019 | <i>NA</i>          | 5.84 | 5.52 | 5.49 | 5.91  |
| ENSMUSG00000062031 | <i>Athl1</i>       | 3.83 | 4.47 | 4.12 | 4.08  |
| ENSMUSG00000062040 | <i>Zfp27</i>       | 1.43 | 1.16 | 0.73 | 0.71  |
| ENSMUSG00000062054 | <i>Iah1</i>        | 7.16 | 7.15 | 7.35 | 7.01  |
| ENSMUSG00000062070 | <i>Pgk1</i>        | 3.72 | 3.28 | 3.64 | 2.98  |
| ENSMUSG00000062075 | <i>Lmnb2</i>       | 1.66 | 2.08 | 1.67 | 1.55  |
| ENSMUSG00000062078 | <i>Qk</i>          | 3.24 | 2.72 | 3.01 | 2.72  |
| ENSMUSG00000062098 | <i>Btbd3</i>       | 1.17 | 0.59 | 0.82 | 0.28  |
| ENSMUSG00000062101 | <i>BC031441</i>    | 1.25 | 0.32 | 0.78 | -0.29 |
| ENSMUSG00000062110 | <i>Scfd2</i>       | 1.29 | 1.72 | 1.56 | 1.43  |
| ENSMUSG00000062116 | <i>5730403M16R</i> | 2.63 | 2.2  | 2.55 | 2.41  |
| ENSMUSG00000062127 | <i>Cttnbp2nl</i>   | 1.05 | 0.97 | 0.93 | 0.57  |
| ENSMUSG00000062169 | <i>Cnih4</i>       | 2.5  | 2.18 | 2.4  | 2.06  |
| ENSMUSG00000062181 | <i>EG13909</i>     | 7.39 | 6.9  | 6.9  | 6.83  |
| ENSMUSG00000062190 | <i>Lancl2</i>      | 1.69 | 1.43 | 1.41 | 1     |
| ENSMUSG00000062198 | <i>2700097O09R</i> | 2.03 | 2.02 | 2.39 | 1.75  |
| ENSMUSG00000062202 | <i>Btbd9</i>       | 3.17 | 2.93 | 2.9  | 2.51  |
| ENSMUSG00000062203 | <i>Gspt1</i>       | 6.06 | 5.11 | 5.62 | 5.25  |
| ENSMUSG00000062232 | <i>Rapgef2</i>     | 1.48 | 1.46 | 1.56 | 1.54  |
| ENSMUSG00000062234 | <i>Gak</i>         | 4.56 | 4.91 | 4.85 | 4.68  |
| ENSMUSG00000062260 | <i>AA415398</i>    | 1.77 | 1.33 | 2.06 | 1.99  |
| ENSMUSG00000062300 | <i>Pvrl2</i>       | 3.4  | 4.4  | 3.67 | 3.79  |
| ENSMUSG00000062352 | <i>Itgb1bp1</i>    | 3.35 | 3.46 | 3.64 | 3.74  |
| ENSMUSG00000062373 | <i>Tmem65</i>      | 1.93 | 0.89 | 1.41 | 1.14  |
| ENSMUSG00000062376 | <i>2010012O05R</i> | 3.02 | 3.57 | 3.42 | 2.87  |
| ENSMUSG00000062381 | <i>Vps28</i>       | 5.91 | 6.49 | 6.29 | 6.06  |
| ENSMUSG00000062397 | <i>Zfp706</i>      | 5.91 | 4.47 | 5.31 | 4.85  |
| ENSMUSG00000062410 | <i>Hsd3b3</i>      | 6.06 | 4.45 | 5.49 | 5.44  |
| ENSMUSG00000062421 | <i>Arf2</i>        | 2.26 | 2.37 | 1.9  | 1.86  |

|                    |                     |      |      |      |      |
|--------------------|---------------------|------|------|------|------|
| ENSMUSG00000062480 | <i>Acat3</i>        | 7.26 | 6.92 | 6.89 | 6.45 |
| ENSMUSG00000062515 | <i>Fabp4</i>        | 3.48 | 2.36 | 3    | 2.91 |
| ENSMUSG00000062526 | <i>Mppel1</i>       | 2.39 | 2.09 | 2.48 | 2.05 |
| ENSMUSG00000062563 | <i>Cys1</i>         | 0.74 | 2.07 | 1.74 | 1.38 |
| ENSMUSG00000062580 | <i>Timm17a</i>      | 3.51 | 2.52 | 3.08 | 3.09 |
| ENSMUSG00000062585 | <i>Cnr2</i>         | 1.44 | 1.79 | 1.35 | 1.87 |
| ENSMUSG00000062604 | <i>Srpk2</i>        | 2.66 | 1.21 | 2.32 | 1.88 |
| ENSMUSG00000062619 | <i>2310039H08R1</i> | 4.65 | 4.93 | 5.2  | 4.96 |
| ENSMUSG00000062624 | <i>Cyp2c67</i>      | 6.03 | 5.43 | 6.02 | 6.01 |
| ENSMUSG00000062627 | <i>Mysm1</i>        | 2.03 | 0.91 | 1.54 | 1.2  |
| ENSMUSG00000062646 | <i>mFLJ00088</i>    | 3.23 | 1.95 | 3.18 | 1.79 |
| ENSMUSG00000062647 | <i>Rpl7a</i>        | 4.16 | 4.28 | 4.08 | 4.08 |
| ENSMUSG00000062691 | <i>NA</i>           | 4.46 | 3.65 | 4.04 | 3.89 |
| ENSMUSG00000062729 | <i>Ppox</i>         | 2.83 | 3.19 | 2.79 | 2.73 |
| ENSMUSG00000062761 | <i>Zfp512</i>       | 1.53 | 2.08 | 2    | 1.85 |
| ENSMUSG00000062762 | <i>Ei24</i>         | 8.13 | 7.08 | 7.4  | 6.81 |
| ENSMUSG00000062797 | <i>l7Rn6</i>        | 5.1  | 3.93 | 4.49 | 4.43 |
| ENSMUSG00000062822 | <i>4833420G17R1</i> | 1.84 | 0.4  | 2.57 | 1.44 |
| ENSMUSG00000062895 | <i>NA</i>           | 4.75 | 1.52 | 3.84 | 5.34 |
| ENSMUSG00000062901 | <i>Klhl24</i>       | 4.66 | 3.05 | 4.2  | 3.21 |
| ENSMUSG00000062906 | <i>Hdac10</i>       | 2.52 | 2.61 | 2.14 | 2.04 |
| ENSMUSG00000062908 | <i>Acadm</i>        | 8.04 | 7.11 | 7.81 | 7.47 |
| ENSMUSG00000062929 | <i>Cfl2</i>         | 5.95 | 5.35 | 5.5  | 4.96 |
| ENSMUSG00000062931 | <i>NA</i>           | 1.29 | 1.08 | 0.64 | 0.2  |
| ENSMUSG00000062937 | <i>Mtap</i>         | 5.24 | 4.2  | 4.8  | 4.26 |
| ENSMUSG00000062946 | <i>NA</i>           | 0.56 | 0.24 | 1.6  | 0.5  |
| ENSMUSG00000062949 | <i>Atp11c</i>       | 5.72 | 4.65 | 5.25 | 4.58 |
| ENSMUSG00000062960 | <i>Kdr</i>          | 3.56 | 3.98 | 3.21 | 3.47 |
| ENSMUSG00000062963 | <i>Ufc1</i>         | 6.07 | 5.95 | 5.67 | 5.56 |
| ENSMUSG00000062980 | <i>A430107O13R1</i> | 3.73 | 3.3  | 3.69 | 3.53 |
| ENSMUSG00000062981 | <i>D10Ertd322e</i>  | 3.64 | 3.35 | 3.62 | 3.73 |

|                    |                     |      |       |      |      |
|--------------------|---------------------|------|-------|------|------|
| ENSMUSG00000062997 | <i>Rpl35</i>        | 0.35 | 0.34  | 1.06 | 0.77 |
| ENSMUSG00000063015 | <i>Ccni</i>         | 6.07 | 5.23  | 5.72 | 5.15 |
| ENSMUSG00000063019 | <i>Manbal</i>       | 3.16 | 3.6   | 3.26 | 3.38 |
| ENSMUSG00000063049 | <i>Ing2</i>         | 2.44 | 1.88  | 1.77 | 1.45 |
| ENSMUSG00000063052 | <i>Lrrc40</i>       | 2.62 | 1.73  | 2.22 | 1.83 |
| ENSMUSG00000063065 | <i>Mapk3</i>        | 4.3  | 4.89  | 4.54 | 4.5  |
| ENSMUSG00000063077 | <i>Kif1b</i>        | 4.34 | 4.01  | 4.35 | 3.93 |
| ENSMUSG00000063108 | <i>mKIAA4196</i>    | 1.31 | 0.79  | 0.88 | 0.23 |
| ENSMUSG00000063145 | <i>Bbs5</i>         | 1.22 | 0.68  | 2.07 | 0.91 |
| ENSMUSG00000063171 | NA                  | 3.11 | 3.76  | 3.77 | 3.73 |
| ENSMUSG00000063172 | <i>2900042B11Ri</i> | 2.07 | 1.17  | 2.08 | 1.55 |
| ENSMUSG00000063179 | <i>Pstk</i>         | 2.91 | 1.68  | 2.59 | 2.26 |
| ENSMUSG00000063200 | <i>Nol7</i>         | 4.88 | 4.3   | 4.51 | 3.85 |
| ENSMUSG00000063229 | <i>Ldha</i>         | 7.43 | 8.04  | 7.64 | 7.41 |
| ENSMUSG00000063232 | <i>Serpina11</i>    | 6.42 | 7.36  | 6.2  | 6.83 |
| ENSMUSG00000063235 | <i>Ptpmt1</i>       | 5.35 | 5.42  | 5.47 | 5.05 |
| ENSMUSG00000063236 | <i>1110038F14Ri</i> | 2.61 | 2.55  | 2.65 | 2.57 |
| ENSMUSG00000063253 | <i>Scoc</i>         | 1.77 | -0.23 | 0.61 | 0.12 |
| ENSMUSG00000063268 | <i>Plec1</i>        | 2.6  | 2.91  | 2.72 | 2.51 |
| ENSMUSG00000063273 | <i>Narg1</i>        | 4.19 | 3.38  | 3.81 | 3.24 |
| ENSMUSG00000063275 | <i>Ptpla</i>        | 1.45 | 1.66  | 1.47 | 1.22 |
| ENSMUSG00000063281 | <i>Zfp35</i>        | 3.33 | 2.97  | 2.87 | 2.42 |
| ENSMUSG00000063316 | <i>Rpl27</i>        | 0.25 | 1.53  | 1.44 | 1.12 |
| ENSMUSG00000063317 | NA                  | 1.13 | 0.53  | 0.66 | 0.99 |
| ENSMUSG00000063320 | NA                  | 3.26 | 3.54  | 3.96 | 3.71 |
| ENSMUSG00000063334 | <i>Krr1</i>         | 3.75 | 3.42  | 3.52 | 3.3  |
| ENSMUSG00000063354 | <i>Slc39a4</i>      | 4.83 | 5.56  | 5.06 | 5.27 |
| ENSMUSG00000063358 | <i>Mapk1</i>        | 5.45 | 5.1   | 5.43 | 5.07 |
| ENSMUSG00000063362 | <i>Alg11</i>        | 3.42 | 2.99  | 3.14 | 2.78 |
| ENSMUSG00000063382 | <i>Bcl9l</i>        | 3.19 | 4.56  | 3.68 | 3.5  |
| ENSMUSG00000063388 | NA                  | 4.46 | -0.45 | 0.88 | 1.06 |



|                    |                     |      |      |      |      |
|--------------------|---------------------|------|------|------|------|
| ENSMUSG00000063406 | <i>Tmed5</i>        | 4.48 | 3.28 | 3.88 | 3.24 |
| ENSMUSG00000063410 | <i>Stk24</i>        | 3.63 | 3.78 | 3.78 | 3.39 |
| ENSMUSG00000063415 | <i>Cyp26b1</i>      | 1.31 | 1.51 | 1.57 | 1.25 |
| ENSMUSG00000063428 | <i>Ddo</i>          | 3.56 | 3.02 | 3.58 | 3.41 |
| ENSMUSG00000063439 | <i>B9d2</i>         | 1.95 | 2.01 | 2.68 | 2.31 |
| ENSMUSG00000063445 | <i>Nmral1</i>       | 1.73 | 1.83 | 1.59 | 1.99 |
| ENSMUSG00000063450 | <i>Syne2</i>        | 1.71 | 1.76 | 2.1  | 1.89 |
| ENSMUSG00000063457 | <i>Rps15</i>        | 6.57 | 7.08 | 7.02 | 7.55 |
| ENSMUSG00000063488 | NA                  | 1.76 | 1.26 | 1.9  | 1.22 |
| ENSMUSG00000063495 | NA                  | 3.51 | 1.55 | 2.4  | 3.05 |
| ENSMUSG00000063511 | <i>Snrp70</i>       | 3.49 | 4.18 | 3.57 | 3.47 |
| ENSMUSG00000063524 | <i>Eno1</i>         | 3.61 | 3.36 | 4.4  | 3.03 |
| ENSMUSG00000063550 | <i>Nup98</i>        | 2.6  | 2.39 | 2.48 | 2.42 |
| ENSMUSG00000063558 | <i>Aox1</i>         | 4.11 | 4.21 | 3.93 | 3.93 |
| ENSMUSG00000063576 | <i>Klhdc3</i>       | 5.08 | 5.56 | 5.32 | 5.26 |
| ENSMUSG00000063656 | NA                  | 4.88 | 4.48 | 4.53 | 4.44 |
| ENSMUSG00000063659 | <i>Zfp238</i>       | 3.07 | 2.91 | 2.86 | 2.57 |
| ENSMUSG00000063683 | <i>Glyat</i>        | 6.27 | 5.76 | 5.88 | 5.93 |
| ENSMUSG00000063684 | NA                  | 2.84 | 1.7  | 2.4  | 3.29 |
| ENSMUSG00000063696 | NA                  | 2.46 | 3.78 | 3.36 | 3.25 |
| ENSMUSG00000063704 | <i>Mapk15</i>       | 1.56 | 2.33 | 1.36 | 1.3  |
| ENSMUSG00000063727 | <i>Tnfrsf11b</i>    | 1.94 | 1.35 | 1.68 | 1.58 |
| ENSMUSG00000063730 | <i>Hsd3b2</i>       | 2.48 | 3.23 | 2.5  | 3.01 |
| ENSMUSG00000063739 | NA                  | 1.37 | 1.34 | 2.23 | 0.9  |
| ENSMUSG00000063757 | <i>4632433K11Ri</i> | 0.83 | 1.55 | 1.38 | 0.89 |
| ENSMUSG00000063760 | NA                  | 4.19 | 3.4  | 3.29 | 3.71 |
| ENSMUSG00000063785 | <i>Utp14a</i>       | 3.37 | 2.83 | 3.49 | 3.26 |
| ENSMUSG00000063787 | <i>Chchd1</i>       | 5.43 | 4.13 | 5.19 | 5.11 |
| ENSMUSG00000063800 | <i>Prpf38a</i>      | 2.83 | 2.37 | 2.89 | 2.52 |
| ENSMUSG00000063801 | <i>Ap3s2</i>        | 2.94 | 3.13 | 3.04 | 3.03 |
| ENSMUSG00000063802 | <i>1500019G21Ri</i> | 3.89 | 4.83 | 4.19 | 4.12 |

|                    |                  |       |       |       |       |
|--------------------|------------------|-------|-------|-------|-------|
| ENSMUSG00000063808 | <i>Gpatch1</i>   | 1.98  | 1.83  | 1.79  | 1.44  |
| ENSMUSG00000063849 | <i>Ppdc</i>      | 2.33  | 2.67  | 2.38  | 2.4   |
| ENSMUSG00000063856 | <i>Gpx1</i>      | 10.47 | 10.39 | 10.17 | 10.11 |
| ENSMUSG00000063870 | <i>mKIAA4075</i> | 4.59  | 4.66  | 4.56  | 4.2   |
| ENSMUSG00000063882 | <i>Uqcrh</i>     | 6.9   | 6.41  | 7.09  | 7.04  |
| ENSMUSG00000063884 | <i>Ptcd3</i>     | 4.55  | 3.7   | 4.13  | 3.59  |
| ENSMUSG00000063886 | <i>NA</i>        | 2.05  | 2.38  | 2.32  | 2.23  |
| ENSMUSG00000063888 | <i>Rpl7l1</i>    | 5.26  | 5.65  | 5.08  | 5.27  |
| ENSMUSG00000063889 | <i>Crem</i>      | 3.55  | 2.78  | 2.73  | 2.74  |
| ENSMUSG00000063894 | <i>Zfp192</i>    | 1.82  | 1.11  | 1.36  | 0.56  |
| ENSMUSG00000063895 | <i>Nup11</i>     | 2.8   | 2.55  | 2.71  | 2.19  |
| ENSMUSG00000063902 | <i>NA</i>        | 4.69  | 4.31  | 4.22  | 5.13  |
| ENSMUSG00000063904 | <i>Dpp3</i>      | 4.66  | 4.94  | 4.74  | 4.75  |
| ENSMUSG00000063929 | <i>Cyp4a32</i>   | 2.3   | 2.35  | 1.36  | 2.44  |
| ENSMUSG00000063931 | <i>Pepd</i>      | 5.11  | 5.47  | 5.22  | 4.9   |
| ENSMUSG00000063952 | <i>Brpf3</i>     | 3.04  | 3.34  | 3.24  | 3.25  |
| ENSMUSG00000063972 | <i>Nr6a1</i>     | 1.41  | 1.07  | 1.85  | 1.48  |
| ENSMUSG00000064021 | <i>NA</i>        | 0.7   | 1.04  | 1.41  | 2.62  |
| ENSMUSG00000064030 | <i>Wibg</i>      | 3.08  | 4     | 3.4   | 2.93  |
| ENSMUSG00000064037 | <i>Xab1</i>      | 2.58  | 2.92  | 2.59  | 2.42  |
| ENSMUSG00000064068 | <i>Mtx1</i>      | 4.39  | 4.49  | 4.28  | 4.31  |
| ENSMUSG00000064090 | <i>Vrk2</i>      | 1.98  | 1.86  | 2.09  | 1.61  |
| ENSMUSG00000064105 | <i>Cnnm2</i>     | 2.27  | 2.28  | 2.57  | 2.16  |
| ENSMUSG00000064120 | <i>Mocs1</i>     | 6.38  | 6.6   | 6.66  | 6.38  |
| ENSMUSG00000064127 | <i>Med14</i>     | 1.87  | 1.34  | 1.89  | 1.55  |
| ENSMUSG00000064138 | <i>NA</i>        | 2.75  | 2.06  | 2.06  | 1.64  |
| ENSMUSG00000064145 | <i>Ari2</i>      | 3.28  | 3.13  | 2.94  | 2.8   |
| ENSMUSG00000064163 | <i>NA</i>        | 3.92  | 3.4   | 4.32  | 4.66  |
| ENSMUSG00000064181 | <i>Rab3ip</i>    | 4.79  | 4.38  | 4.63  | 4.17  |
| ENSMUSG00000064210 | <i>Tmem16f</i>   | 2.12  | 1.72  | 1.51  | 1.26  |
| ENSMUSG00000064215 | <i>ISG12a</i>    | 5.49  | 5.93  | 5.45  | 5.68  |

|                    |                     |        |       |       |        |
|--------------------|---------------------|--------|-------|-------|--------|
| ENSMUSG00000064225 | <i>Paqr9</i>        | 5.75   | 6.36  | 5.3   | 5.08   |
| ENSMUSG00000064254 | <i>Ethel</i>        | 6.08   | 6.56  | 6.05  | 5.6    |
| ENSMUSG00000064262 | <i>Gimap8</i>       | 1.44   | 0.71  | 0.65  | 0.36   |
| ENSMUSG00000064267 | <i>Hvcn1</i>        | 0.48   | 0.66  | 1.55  | 0.47   |
| ENSMUSG00000064284 | <i>2210021J22Ri</i> | 1.22   | 2.44  | 2.34  | 2.36   |
| ENSMUSG00000064289 | <i>Tank</i>         | 3.21   | 2.08  | 2.84  | 2.33   |
| ENSMUSG00000064294 | <i>Aox3</i>         | 6.14   | 5.84  | 5.78  | 5.85   |
| ENSMUSG00000064302 | <i>Clasp1</i>       | 2.14   | 1.63  | 1.94  | 1.9    |
| ENSMUSG00000064307 | <i>NA</i>           | 1.74   | 1.94  | 1.68  | 1.48   |
| ENSMUSG00000064326 | <i>Siva1</i>        | 0.58   | 1.78  | 1.62  | 0.52   |
| ENSMUSG00000064373 | <i>Sepp1</i>        | 11.57  | 11.49 | 11.69 | 11.43  |
| ENSMUSG00000064405 | <i>NA</i>           | 1.35   | -0.13 | 0.56  | 0.34   |
| ENSMUSG00000064441 | <i>NA</i>           | #NAME? | -2.68 | 1.67  | -0.05  |
| ENSMUSG00000064493 | <i>NA</i>           | 4.73   | 2.34  | 3.66  | 1.83   |
| ENSMUSG00000064540 | <i>NA</i>           | 3.08   | 3.06  | 3.4   | 2.4    |
| ENSMUSG00000064615 | <i>NA</i>           | 1.01   | -0.19 | 0.24  | #NAME? |
| ENSMUSG00000064637 | <i>NA</i>           | 4.22   | 4.24  | 3.52  | 2.9    |
| ENSMUSG00000064647 | <i>NA</i>           | 0.81   | 0.44  | 1.2   | #NAME? |
| ENSMUSG00000064725 | <i>NA</i>           | 1.32   | 1.2   | -0.91 | 0.54   |
| ENSMUSG00000064791 | <i>NA</i>           | 1.67   | 2.1   | 3.38  | 2.38   |
| ENSMUSG00000064797 | <i>NA</i>           | 3.3    | 2.15  | 2.7   | -0.57  |
| ENSMUSG00000064816 | <i>NA</i>           | 1.46   | 1.97  | -0.76 | #NAME? |
| ENSMUSG00000064949 | <i>NA</i>           | 1.23   | 0.68  | 0.91  | 0.29   |
| ENSMUSG00000064981 | <i>NA</i>           | 1.71   | -0.85 | 0.46  | -1.1   |
| ENSMUSG00000064995 | <i>NA</i>           | 0.52   | -0.78 | 1.38  | 0.4    |
| ENSMUSG00000065037 | <i>NA</i>           | 3.6    | 4.51  | 5.79  | 5.01   |
| ENSMUSG00000065087 | <i>NA</i>           | 1.24   | -1.33 | -1.33 | -0.71  |
| ENSMUSG00000065105 | <i>NA</i>           | 2.3    | 2.68  | 2.58  | 0.43   |
| ENSMUSG00000065124 | <i>NA</i>           | 1.11   | -0.58 | -0.42 | -1.14  |
| ENSMUSG00000065126 | <i>NA</i>           | -0.81  | 0.43  | 1.23  | 1.05   |
| ENSMUSG00000065265 | <i>NA</i>           | 1.21   | 0.55  | 1.5   | -0.89  |

|                    |                    |        |       |       |        |
|--------------------|--------------------|--------|-------|-------|--------|
| ENSMUSG00000065331 | NA                 | -0.13  | -0.1  | 1.43  | -1.1   |
| ENSMUSG00000065407 | NA                 | 5.63   | 6.57  | 6.23  | 6.3    |
| ENSMUSG00000065455 | NA                 | 0.12   | 2.12  | 1.13  | 1.93   |
| ENSMUSG00000065463 | NA                 | 1.64   | -0.68 | 0.82  | 0.14   |
| ENSMUSG00000065475 | NA                 | 0.29   | 1.2   | 1.49  | -0.16  |
| ENSMUSG00000065487 | NA                 | 1.4    | 2.73  | 2.32  | 2.42   |
| ENSMUSG00000065529 | NA                 | 2.24   | 2.5   | 2.35  | 2.61   |
| ENSMUSG00000065548 | NA                 | 0.61   | 1.85  | 1.13  | 1.02   |
| ENSMUSG00000065591 | NA                 | 1.32   | -1.1  | -0.19 | -1.25  |
| ENSMUSG00000065663 | NA                 | 1.29   | -0.97 | 0.17  | #NAME? |
| ENSMUSG00000065862 | NA                 | 1.85   | 1.17  | 0.63  | 0.69   |
| ENSMUSG00000065870 | NA                 | #NAME? | -2.08 | 1.37  | -1.08  |
| ENSMUSG00000065887 | NA                 | 3.91   | 1.54  | 2.97  | 3.08   |
| ENSMUSG00000065954 | <i>Tacc1</i>       | 3.58   | 3.95  | 3.41  | 3.51   |
| ENSMUSG00000065979 | <i>C530044N13R</i> | 5.49   | 5.4   | 5.55  | 5.25   |
| ENSMUSG00000065987 | <i>Cd209b</i>      | 1.31   | 1.52  | 0.78  | 0.73   |
| ENSMUSG00000065990 | <i>Aurkaip1</i>    | 5.68   | 5.71  | 5.92  | 5.68   |
| ENSMUSG00000066026 | <i>Dhrs3</i>       | 7.35   | 7.57  | 7.47  | 7.31   |
| ENSMUSG00000066036 | <i>Zubr1</i>       | 3.84   | 4.05  | 3.99  | 3.73   |
| ENSMUSG00000066037 | <i>Hnrnpr</i>      | 2.5    | 2.05  | 1.98  | 1.58   |
| ENSMUSG00000066042 | <i>Med18</i>       | 1.16   | 0.06  | 0.71  | 0.63   |
| ENSMUSG00000066043 | <i>Phactr4</i>     | 4.3    | 4.12  | 4.06  | 3.94   |
| ENSMUSG00000066048 | NA                 | 2.59   | 2.49  | 2.77  | 1.83   |
| ENSMUSG00000066072 | <i>Cyp4a10</i>     | 9.28   | 8.71  | 8.91  | 7.97   |
| ENSMUSG00000066148 | <i>Prpf4</i>       | 2.47   | 2.1   | 2.24  | 2.21   |
| ENSMUSG00000066149 | <i>Cdc26</i>       | 2.07   | 1.74  | 1.7   | 2.25   |
| ENSMUSG00000066150 | <i>Slc31a1</i>     | 6.68   | 6.12  | 6.35  | 5.95   |
| ENSMUSG00000066151 | NA                 | 2.96   | 3.3   | 3.38  | 3.15   |
| ENSMUSG00000066152 | <i>Slc31a2</i>     | 2.94   | 2.78  | 2.81  | 2.71   |
| ENSMUSG00000066153 | <i>OTTMUSG000</i>  | 1.4    | 0.1   | 1.28  | 1.42   |
| ENSMUSG00000066154 | <i>Mup3</i>        | 9.17   | 8.96  | 8.65  | 9.44   |

|                    |                     |      |      |      |      |
|--------------------|---------------------|------|------|------|------|
| ENSMUSG00000066175 | <i>NA</i>           | 1.31 | 2.76 | 2.46 | 3.09 |
| ENSMUSG00000066232 | <i>Ipo7</i>         | 5.56 | 4.87 | 5.3  | 4.76 |
| ENSMUSG00000066233 | <i>Tmem42</i>       | 2.84 | 3.01 | 2.95 | 2.4  |
| ENSMUSG00000066235 | <i>C85492</i>       | 0.71 | 1.4  | 1.36 | 1.57 |
| ENSMUSG00000066278 | <i>Vps37b</i>       | 3.18 | 3.9  | 3.24 | 3.01 |
| ENSMUSG00000066306 | <i>Numa1</i>        | 3.31 | 3.66 | 3.56 | 3.38 |
| ENSMUSG00000066319 | <i>Rtp3</i>         | 4.61 | 4.68 | 4.69 | 4.81 |
| ENSMUSG00000066324 | <i>Impad1</i>       | 4.31 | 3.27 | 3.83 | 3.31 |
| ENSMUSG00000066357 | <i>Wdr6</i>         | 1.73 | 2.48 | 2.44 | 2.21 |
| ENSMUSG00000066361 | <i>Serpina3c</i>    | 4.06 | 4.52 | 3.9  | 3.68 |
| ENSMUSG00000066362 | <i>NA</i>           | 1.28 | 2.08 | 0.72 | 1.87 |
| ENSMUSG00000066363 | <i>Serpina3f</i>    | 2.68 | 1.29 | 1.28 | 0.97 |
| ENSMUSG00000066366 | <i>Serpina1a</i>    | 8.16 | 8.29 | 8.49 | 8.61 |
| ENSMUSG00000066406 | <i>NA</i>           | 2.15 | 1.83 | 2.86 | 2.63 |
| ENSMUSG00000066415 | <i>NA</i>           | 3.9  | 3.32 | 3.56 | 3.24 |
| ENSMUSG00000066440 | <i>Zfyve26</i>      | 2.85 | 2.64 | 3.04 | 2.68 |
| ENSMUSG00000066441 | <i>Rdh11</i>        | 5.73 | 5.33 | 4.83 | 4.55 |
| ENSMUSG00000066442 | <i>Mthfs</i>        | 1.59 | 0.83 | 1.43 | 1.21 |
| ENSMUSG00000066491 | <i>NA</i>           | 4.25 | 3.24 | 3.88 | 5.45 |
| ENSMUSG00000066513 | <i>Klk1b4</i>       | 0.89 | 0.09 | 1.49 | 1.26 |
| ENSMUSG00000066551 | <i>Hmgbl</i>        | 1.27 | 0.29 | 1.36 | 1.02 |
| ENSMUSG00000066553 | <i>NA</i>           | 3.31 | 0.27 | 3.88 | 4.02 |
| ENSMUSG00000066568 | <i>Lsm14a</i>       | 4.32 | 3.83 | 3.98 | 3.74 |
| ENSMUSG00000066571 | <i>4931406P16Ri</i> | 2.06 | 1.72 | 1.91 | 1.99 |
| ENSMUSG00000066595 | <i>Flvcr1</i>       | 1.19 | 0.79 | 1.23 | 0.25 |
| ENSMUSG00000066621 | <i>mKIAA1358</i>    | 1.06 | 1.76 | 1.43 | 0.95 |
| ENSMUSG00000066637 | <i>Ttc32</i>        | 3.98 | 2.17 | 3.65 | 3.09 |
| ENSMUSG00000066640 | <i>Fbxl18</i>       | 0.88 | 1.1  | 1.04 | 0.88 |
| ENSMUSG00000066647 | <i>EG330503</i>     | 1.11 | 0.51 | 0.88 | 0.47 |
| ENSMUSG00000066687 | <i>Zbtb16</i>       | 4.17 | 4.23 | 3.68 | 3.53 |
| ENSMUSG00000066705 | <i>Fxyd6</i>        | 0.73 | 1.27 | 1.17 | 1.62 |

|                    |                     |      |      |      |      |
|--------------------|---------------------|------|------|------|------|
| ENSMUSG00000066735 | <i>Vkorc111</i>     | 0.97 | 0.67 | 1.48 | 0.95 |
| ENSMUSG00000066757 | <i>NA</i>           | 2.67 | 1.55 | 2.04 | 3.07 |
| ENSMUSG00000066798 | <i>Zbtb6</i>        | 2.06 | 0.42 | 1.44 | 1.04 |
| ENSMUSG00000066839 | <i>Ecsit</i>        | 5.05 | 5.53 | 5.3  | 5.12 |
| ENSMUSG00000066880 | <i>Zfp617</i>       | 1.66 | 0.34 | 1.6  | 0.45 |
| ENSMUSG00000066892 | <i>Fbxl12</i>       | 1.1  | 1.02 | 1.45 | 1.45 |
| ENSMUSG00000066900 | <i>Suds3</i>        | 5.47 | 5.96 | 5.69 | 5.57 |
| ENSMUSG00000066944 | <i>NA</i>           | 0.95 | 1.39 | 1.14 | 1.69 |
| ENSMUSG00000066952 | <i>NA</i>           | 2.08 | 2.17 | 1.65 | 1.36 |
| ENSMUSG00000066979 | <i>Bub3</i>         | 3.89 | 4.63 | 4.28 | 4.19 |
| ENSMUSG00000067071 | <i>Hes6</i>         | 4.22 | 5.03 | 4.27 | 4.57 |
| ENSMUSG00000067085 | <i>NA</i>           | 3.68 | 4.27 | 4.15 | 3.9  |
| ENSMUSG00000067124 | <i>NA</i>           | 2.22 | 2.57 | 2.76 | 2.47 |
| ENSMUSG00000067144 | <i>Slc22a7</i>      | 3.23 | 3.07 | 3.62 | 3.06 |
| ENSMUSG00000067148 | <i>Rpo1-1</i>       | 4.13 | 4.84 | 4.49 | 4.35 |
| ENSMUSG00000067149 | <i>Igj</i>          | 0.43 | 1.48 | 3.87 | 1.27 |
| ENSMUSG00000067150 | <i>Xpo5</i>         | 2.5  | 2.68 | 2.66 | 2.51 |
| ENSMUSG00000067189 | <i>NA</i>           | 1.03 | 0.22 | 1.73 | 1.38 |
| ENSMUSG00000067194 | <i>Eif1ay</i>       | 5.48 | 4.16 | 4.71 | 3.91 |
| ENSMUSG00000067212 | <i>H2-T23</i>       | 6.1  | 6.69 | 6.47 | 6.36 |
| ENSMUSG00000067219 | <i>Npall</i>        | 2.95 | 1.15 | 2.99 | 1.43 |
| ENSMUSG00000067225 | <i>Cyp2c54</i>      | 8.24 | 7.63 | 7.57 | 7.46 |
| ENSMUSG00000067235 | <i>H2-Q10</i>       | 9.43 | 9.65 | 9.54 | 9.43 |
| ENSMUSG00000067274 | <i>Arbp</i>         | 4.7  | 5.33 | 5.2  | 4.93 |
| ENSMUSG00000067279 | <i>Ppp1r3c</i>      | 6.26 | 6.11 | 5.48 | 4.96 |
| ENSMUSG00000067284 | <i>Hspa1b</i>       | 0.18 | 2.13 | 2.47 | 4.53 |
| ENSMUSG00000067336 | <i>Bmpr2</i>        | 2.63 | 2.51 | 2.51 | 2.53 |
| ENSMUSG00000067365 | <i>Tmem128</i>      | 3.81 | 3.11 | 3.73 | 3.44 |
| ENSMUSG00000067367 | <i>Lyar</i>         | 3.25 | 3.23 | 3.4  | 2.85 |
| ENSMUSG00000067369 | <i>4732479N06Ri</i> | 3.6  | 3.27 | 3.32 | 2.53 |
| ENSMUSG00000067424 | <i>Zfp563</i>       | 1.15 | 0.26 | 0.77 | 0.16 |

|                    |                     |       |       |      |       |
|--------------------|---------------------|-------|-------|------|-------|
| ENSMUSG00000067480 | <i>OTTMUSG000</i>   | 2.8   | 0.88  | 2.79 | 1.66  |
| ENSMUSG00000067567 | <i>Hdac8</i>        | 1.11  | 0.43  | 1.54 | 1.41  |
| ENSMUSG00000067579 | <i>NA</i>           | 2.32  | 3     | 3.08 | 3.35  |
| ENSMUSG00000067586 | <i>Edg3</i>         | 1.04  | 0.74  | 0.79 | 0.15  |
| ENSMUSG00000067608 | <i>NA</i>           | 2.54  | 1.31  | 2.61 | 1.6   |
| ENSMUSG00000067653 | <i>Ankrd23</i>      | -0.71 | -0.43 | 1.02 | 0.47  |
| ENSMUSG00000067656 | <i>NA</i>           | 3.87  | 2.37  | 3.19 | 2.94  |
| ENSMUSG00000067713 | <i>Prkag1</i>       | 4.33  | 5.02  | 4.57 | 4.43  |
| ENSMUSG00000067722 | <i>NA</i>           | 3.89  | 4.08  | 4.31 | 4.17  |
| ENSMUSG00000067736 | <i>NA</i>           | 3.54  | 0.24  | 0.89 | 0.89  |
| ENSMUSG00000067787 | <i>Blcap</i>        | 4.17  | 4.46  | 4.26 | 3.73  |
| ENSMUSG00000067813 | <i>Xkr9</i>         | 3.27  | 1.73  | 2.84 | 2.48  |
| ENSMUSG00000067818 | <i>NA</i>           | 1.42  | 1.97  | 1.98 | 2.1   |
| ENSMUSG00000067825 | <i>Pex26</i>        | 3.14  | 3.42  | 3.22 | 2.98  |
| ENSMUSG00000067847 | <i>2010100O12R1</i> | 4.37  | 5.32  | 6.75 | 6.67  |
| ENSMUSG00000067851 | <i>Arfgef1</i>      | 4.96  | 4.25  | 4.61 | 4.01  |
| ENSMUSG00000067870 | <i>NA</i>           | 2.29  | 2.52  | 2.03 | 3.33  |
| ENSMUSG00000067873 | <i>Htatsf1</i>      | 3.82  | 3.42  | 3.45 | 2.7   |
| ENSMUSG00000067889 | <i>Spnb3</i>        | 3.32  | 3.94  | 4.09 | 3.65  |
| ENSMUSG00000067928 | <i>Zfp760</i>       | 1.1   | 0.34  | 0.86 | -0.32 |
| ENSMUSG00000067931 | <i>BC049807</i>     | 1.26  | 0.6   | 1    | 0.92  |
| ENSMUSG00000067942 | <i>Zfp160</i>       | 1.83  | 0.43  | 0.9  | 0.13  |
| ENSMUSG00000067995 | <i>Gtf2f2</i>       | 2.98  | 2.76  | 2.79 | 2.61  |
| ENSMUSG00000068011 | <i>NA</i>           | 3.08  | 3.42  | 3.48 | 3.38  |
| ENSMUSG00000068015 | <i>Lrch1</i>        | 1.87  | 1.98  | 2.05 | 1.99  |
| ENSMUSG00000068036 | <i>Mllt4</i>        | 2.43  | 2.47  | 2.81 | 2.58  |
| ENSMUSG00000068039 | <i>AK163149</i>     | 7.33  | 7.1   | 7.04 | 6.77  |
| ENSMUSG00000068040 | <i>Tm9sf4</i>       | 4.8   | 5.06  | 4.8  | 4.73  |
| ENSMUSG00000068083 | <i>Cyp2d40</i>      | 5.07  | 5.17  | 5.07 | 5.03  |
| ENSMUSG00000068086 | <i>Cyp2d9</i>       | 5     | 5.81  | 5.33 | 6.35  |
| ENSMUSG00000068101 | <i>Cenpm</i>        | 2.22  | 2.4   | 2.4  | 1.8   |

|                    |                     |      |       |      |       |
|--------------------|---------------------|------|-------|------|-------|
| ENSMUSG00000068134 | <i>Zfp120</i>       | 2.56 | 1.26  | 1.78 | 0.93  |
| ENSMUSG00000068184 | <i>NA</i>           | 4.79 | 3.52  | 4.2  | 3.7   |
| ENSMUSG00000068188 | <i>NA</i>           | 4    | 3     | 4.1  | 3.32  |
| ENSMUSG00000068206 | <i>Pick1</i>        | 2.16 | 2.89  | 2.6  | 2.2   |
| ENSMUSG00000068220 | <i>Lgals1</i>       | 2.93 | 2.55  | 3.45 | 4.05  |
| ENSMUSG00000068240 | <i>NA</i>           | 3.66 | 3.8   | 3.76 | 5.65  |
| ENSMUSG00000068246 | <i>NA</i>           | 4.34 | 4.09  | 3.93 | 4.35  |
| ENSMUSG00000068250 | <i>NA</i>           | 1.98 | 0.53  | 1.79 | 1.18  |
| ENSMUSG00000068264 | <i>2310035K24Ri</i> | 3.52 | 3.66  | 4.07 | 3.76  |
| ENSMUSG00000068267 | <i>Cenpb</i>        | 4.35 | 5.01  | 4.57 | 4.38  |
| ENSMUSG00000068284 | <i>Gm608</i>        | 3.16 | 2.79  | 2.94 | 2.72  |
| ENSMUSG00000068290 | <i>2600009E05Ri</i> | 6.95 | 6.55  | 6.78 | 6.58  |
| ENSMUSG00000068299 | <i>1700019G17Ri</i> | 1.19 | 1.39  | 0.97 | 0.63  |
| ENSMUSG00000068303 | <i>NA</i>           | 2.77 | 3.17  | 3.11 | 3.09  |
| ENSMUSG00000068328 | <i>Aup1</i>         | 6.94 | 7.29  | 7.21 | 6.97  |
| ENSMUSG00000068329 | <i>HtrA2</i>        | 3.04 | 3.79  | 2.98 | 2.85  |
| ENSMUSG00000068391 | <i>Chrac1</i>       | 4.27 | 4.21  | 4.22 | 4.02  |
| ENSMUSG00000068479 | <i>Mfap1a</i>       | 1.77 | 0.6   | 1.24 | 0.43  |
| ENSMUSG00000068551 | <i>Zfp467</i>       | 1.91 | 2.45  | 2.62 | 2.29  |
| ENSMUSG00000068566 | <i>Myadm</i>        | 3.28 | 3.58  | 3.33 | 2.97  |
| ENSMUSG00000068580 | <i>Zfyve19</i>      | 3.36 | 3.41  | 3.32 | 3.29  |
| ENSMUSG00000068587 | <i>NA</i>           | 3.28 | 2.35  | 2.95 | 2.53  |
| ENSMUSG00000068606 | <i>EG225594</i>     | 1.92 | -0.79 | -1.1 | -0.75 |
| ENSMUSG00000068663 | <i>Clec16a</i>      | 2.86 | 2.8   | 2.47 | 2.47  |
| ENSMUSG00000068706 | <i>NA</i>           | 4.04 | 3.34  | 3.98 | 4.83  |
| ENSMUSG00000068732 | <i>2010200O16Ri</i> | 4.42 | 4.02  | 4.25 | 3.82  |
| ENSMUSG00000068735 | <i>Trp53i11</i>     | 1.48 | 2.27  | 2.44 | 2.21  |
| ENSMUSG00000068739 | <i>Sars</i>         | 5.1  | 5.79  | 5.38 | 5.34  |
| ENSMUSG00000068742 | <i>Cry2</i>         | 3.26 | 3.96  | 3.94 | 3.67  |
| ENSMUSG00000068749 | <i>Psm5</i>         | 1.37 | 1.31  | 1.52 | 0.97  |
| ENSMUSG00000068762 | <i>Gstm6</i>        | 5.49 | 5.75  | 5.69 | 5.32  |



|                    |                    |      |      |      |      |
|--------------------|--------------------|------|------|------|------|
| ENSMUSG00000068798 | <i>Rap1a</i>       | 3.8  | 2.52 | 3.21 | 2.81 |
| ENSMUSG00000068823 | <i>Csdel</i>       | 6.15 | 5.34 | 5.78 | 5.29 |
| ENSMUSG00000068856 | <i>Sf3b4</i>       | 2.8  | 2.51 | 2.04 | 1.74 |
| ENSMUSG00000068874 | <i>Selenbp1</i>    | 6.47 | 6.77 | 6.65 | 6.48 |
| ENSMUSG00000068876 | <i>NA</i>          | 2.15 | 1.85 | 2.03 | 1.43 |
| ENSMUSG00000068877 | <i>Selenbp2</i>    | 3.25 | 0.37 | 3.12 | 2.05 |
| ENSMUSG00000068882 | <i>Ssb</i>         | 5.29 | 4.33 | 4.78 | 4.2  |
| ENSMUSG00000068910 | <i>NA</i>          | 3.96 | 4.18 | 3.74 | 3.92 |
| ENSMUSG00000068917 | <i>Clk2</i>        | 2.15 | 2.36 | 2.41 | 2.24 |
| ENSMUSG00000068921 | <i>Dap3</i>        | 5.2  | 4.63 | 5.15 | 4.58 |
| ENSMUSG00000068922 | <i>Mstol</i>       | 1.86 | 2.78 | 2.71 | 2.07 |
| ENSMUSG00000069020 | <i>Urm1</i>        | 3.77 | 3.75 | 3.72 | 3.56 |
| ENSMUSG00000069089 | <i>Cdk7</i>        | 3.1  | 2.6  | 3.14 | 3.02 |
| ENSMUSG00000069094 | <i>Pde7a</i>       | 0.83 | 0.2  | 1.01 | 0.04 |
| ENSMUSG00000069135 | <i>Fgfr1op</i>     | 3.28 | 2.57 | 3    | 2.63 |
| ENSMUSG00000069204 | <i>Zfp748</i>      | 1.34 | 0.15 | 0.33 | 0.15 |
| ENSMUSG00000069206 | <i>C330011K17R</i> | 1.91 | 1.22 | 1.74 | 1.2  |
| ENSMUSG00000069208 | <i>BC012278</i>    | 3.84 | 2.75 | 3.39 | 3.04 |
| ENSMUSG00000069237 | <i>C78339</i>      | 4.56 | 3.82 | 4.09 | 3.51 |
| ENSMUSG00000069255 | <i>Dusp22</i>      | 3.28 | 2.57 | 2.77 | 2.15 |
| ENSMUSG00000069324 | <i>NA</i>          | 2.92 | 1.99 | 3.42 | 1.38 |
| ENSMUSG00000069394 | <i>Pcdhga2</i>     | 2.27 | 2.52 | 2.28 | 2.37 |
| ENSMUSG00000069456 | <i>Rdh16</i>       | 5.62 | 5.04 | 5.43 | 4.93 |
| ENSMUSG00000069495 | <i>Epc2</i>        | 2.95 | 2.28 | 2.53 | 2.29 |
| ENSMUSG00000069516 | <i>Lyzs</i>        | 5.09 | 5.32 | 5.5  | 5.05 |
| ENSMUSG00000069520 | <i>Tmem19</i>      | 5.83 | 6.11 | 5.35 | 5.54 |
| ENSMUSG00000069539 | <i>Scyl2</i>       | 4.24 | 3.84 | 3.96 | 3.72 |
| ENSMUSG00000069564 | <i>NA</i>          | 3.57 | 2.49 | 3.38 | 2.45 |
| ENSMUSG00000069565 | <i>Dazap1</i>      | 3.93 | 3.81 | 4.44 | 4.24 |
| ENSMUSG00000069618 | <i>NA</i>          | 0.96 | 1.24 | 1.84 | 1.48 |
| ENSMUSG00000069633 | <i>Pex1lg</i>      | 2.88 | 4    | 3.49 | 3.62 |

|                    |                     |      |      |      |       |
|--------------------|---------------------|------|------|------|-------|
| ENSMUSG00000069637 | <i>NA</i>           | 5.21 | 4.86 | 5.05 | 4.38  |
| ENSMUSG00000069662 | <i>Marcks</i>       | 3.66 | 2.51 | 3.26 | 2.64  |
| ENSMUSG00000069668 | <i>Sult3a1</i>      | 9.93 | 7.14 | 9.33 | 8.27  |
| ENSMUSG00000069678 | <i>Pcgfl</i>        | 0.78 | 1.72 | 1.43 | 1.17  |
| ENSMUSG00000069682 | <i>NA</i>           | 1.77 | 1.48 | 1.22 | 1.56  |
| ENSMUSG00000069729 | <i>Arid1b</i>       | 1.66 | 2.02 | 2.36 | 1.99  |
| ENSMUSG00000069733 | <i>Ube2u</i>        | 2.95 | 1.31 | 2.48 | -0.93 |
| ENSMUSG00000069744 | <i>Psmb3</i>        | 2.52 | 2.98 | 3.06 | 2.32  |
| ENSMUSG00000069769 | <i>Msi2</i>         | 2.55 | 1.62 | 2.22 | 1.81  |
| ENSMUSG00000069792 | <i>OTTMUSG000</i>   | 4.92 | 4.71 | 4.55 | 4.38  |
| ENSMUSG00000069805 | <i>Fbp1</i>         | 9.81 | 9.66 | 10   | 9.82  |
| ENSMUSG00000069808 | <i>2310047D13Rt</i> | 1.56 | 0.98 | 1.39 | 1.02  |
| ENSMUSG00000069825 | <i>Spata22</i>      | 1.06 | 0.03 | 0.06 | 0.15  |
| ENSMUSG00000069835 | <i>Sat2</i>         | 3.2  | 3.77 | 3.49 | 3.4   |
| ENSMUSG00000069844 | <i>Sco1</i>         | 3.31 | 2.19 | 2.91 | 2.36  |
| ENSMUSG00000069874 | <i>Iigp2</i>        | 4.76 | 3.53 | 3.32 | 3.9   |
| ENSMUSG00000069895 | <i>D8Erttd587e</i>  | 2.6  | 2.51 | 2.41 | 2.38  |
| ENSMUSG00000069899 | <i>NA</i>           | 2.77 | 1.81 | 2.07 | 2.54  |
| ENSMUSG00000069917 | <i>Hba-a2</i>       | 1.14 | 4    | 4.81 | 5     |
| ENSMUSG00000069919 | <i>Hba-a2</i>       | 1.48 | 4.43 | 5.22 | 5.45  |
| ENSMUSG00000069920 | <i>C76566</i>       | 3.08 | 1.91 | 2.72 | 2.39  |
| ENSMUSG00000069922 | <i>NA</i>           | 8.8  | 8.61 | 8.39 | 8.75  |
| ENSMUSG00000069972 | <i>NA</i>           | 1.59 | 2.26 | 2.44 | 0.93  |
| ENSMUSG00000070002 | <i>Ell</i>          | 3.62 | 3.85 | 3.97 | 3.72  |
| ENSMUSG00000070003 | <i>Ssbp4</i>        | 0.86 | 1.3  | 1.26 | 1.11  |
| ENSMUSG00000070044 | <i>BC035537</i>     | 3.07 | 2.75 | 2.49 | 2.21  |
| ENSMUSG00000070047 | <i>Fat1</i>         | 1.67 | 1.88 | 2.04 | 1.7   |
| ENSMUSG00000070056 | <i>Mfhas1</i>       | 3.06 | 3.64 | 3.23 | 3.32  |
| ENSMUSG00000070283 | <i>4733401H18Rt</i> | 3.63 | 4.26 | 3.69 | 3.84  |
| ENSMUSG00000070284 | <i>Gmppb</i>        | 3.33 | 4.25 | 3.69 | 3.7   |
| ENSMUSG00000070305 | <i>Mpz13</i>        | 1.89 | 1.29 | 1.66 | 1.33  |

|                    |                     |       |      |      |       |
|--------------------|---------------------|-------|------|------|-------|
| ENSMUSG00000070315 | <i>NA</i>           | 2.72  | 3.02 | 2.94 | 3.02  |
| ENSMUSG00000070319 | <i>Eif3g</i>        | 5.15  | 6.24 | 5.84 | 5.82  |
| ENSMUSG00000070327 | <i>Rnf213</i>       | 2.58  | 2    | 2.25 | 2.3   |
| ENSMUSG00000070343 | <i>NA</i>           | -0.53 | -0.9 | 1.05 | -0.12 |
| ENSMUSG00000070348 | <i>Ccnd1</i>        | 3.78  | 4.39 | 3.69 | 3.76  |
| ENSMUSG00000070371 | <i>Prss36</i>       | 1.09  | 1.43 | 1.37 | 1.02  |
| ENSMUSG00000070392 | <i>Hist2h3c1</i>    | 2.87  | 2.26 | 2.74 | 2.13  |
| ENSMUSG00000070394 | <i>1810027O10Ra</i> | 7.42  | 6.37 | 7.27 | 7.01  |
| ENSMUSG00000070397 | <i>Tmem102</i>      | 2.65  | 2.87 | 2.73 | 2.13  |
| ENSMUSG00000070407 | <i>Hs3st3b1</i>     | 4.6   | 4.47 | 4.62 | 4.34  |
| ENSMUSG00000070420 | <i>Zfp498</i>       | 1.85  | 1.43 | 1.69 | 1.55  |
| ENSMUSG00000070426 | <i>Rnf121</i>       | 3.1   | 2.74 | 2.94 | 2.64  |
| ENSMUSG00000070427 | <i>Il18bp</i>       | 3.64  | 3.06 | 3.07 | 2.56  |
| ENSMUSG00000070436 | <i>Serpinh1</i>     | 3.21  | 3.81 | 2.65 | 3.28  |
| ENSMUSG00000070473 | <i>Cldn3</i>        | 5.03  | 6.44 | 6.02 | 5.9   |
| ENSMUSG00000070488 | <i>NA</i>           | 2.49  | 1.61 | 2.15 | 2.97  |
| ENSMUSG00000070493 | <i>Chchd2</i>       | 6.1   | 5.38 | 5.73 | 4.91  |
| ENSMUSG00000070497 | <i>NA</i>           | 4.65  | 3.04 | 4.37 | 5.19  |
| ENSMUSG00000070520 | <i>Ndn12</i>        | 1.61  | 1.85 | 1.74 | 1.74  |
| ENSMUSG00000070528 | <i>NA</i>           | 1.49  | 0.39 | 1.6  | 1.17  |
| ENSMUSG00000070544 | <i>Top1</i>         | 5.21  | 4.33 | 4.82 | 4.42  |
| ENSMUSG00000070572 | <i>NA</i>           | 1.1   | 1.16 | 0.99 | 2.57  |
| ENSMUSG00000070576 | <i>Mn1</i>          | 2.22  | 3.08 | 2.97 | 2.79  |
| ENSMUSG00000070594 | <i>EG214403</i>     | 6.52  | 5.87 | 6.38 | 5.85  |
| ENSMUSG00000070643 | <i>sox-13</i>       | 1.31  | 1.78 | 2.09 | 1.67  |
| ENSMUSG00000070644 | <i>Etnk2</i>        | 7.82  | 7.57 | 7.84 | 7.27  |
| ENSMUSG00000070645 | <i>Ren1</i>         | 2.4   | 1.96 | 3.49 | 1.81  |
| ENSMUSG00000070661 | <i>Rnf186</i>       | 1.93  | 2.17 | 1.92 | 0.88  |
| ENSMUSG00000070690 | <i>NA</i>           | 2.87  | 3.16 | 2.71 | 3.04  |
| ENSMUSG00000070697 | <i>Utp3</i>         | 4.69  | 4.24 | 4.43 | 4.13  |
| ENSMUSG00000070699 | <i>SerRSmt</i>      | 2.77  | 3.37 | 2.96 | 2.83  |

|                    |                     |      |       |      |      |
|--------------------|---------------------|------|-------|------|------|
| ENSMUSG00000070704 | <i>Ugt2b36</i>      | 8.76 | 8.03  | 8.57 | 8.18 |
| ENSMUSG00000070705 | <i>NA</i>           | 1.48 | 0.81  | 1.08 | 0.65 |
| ENSMUSG00000070730 | <i>I200015F23Ri</i> | 5.21 | 5.45  | 5.28 | 5.06 |
| ENSMUSG00000070733 | <i>Fryl</i>         | 1.33 | 1.02  | 1.66 | 1.11 |
| ENSMUSG00000070737 | <i>LOC10003996</i>  | 3.17 | 2.71  | 2.94 | 2.89 |
| ENSMUSG00000070738 | <i>NA</i>           | 2.58 | 2.97  | 2.82 | 2.62 |
| ENSMUSG00000070780 | <i>BC013481</i>     | 4.36 | 3.73  | 4.4  | 4.21 |
| ENSMUSG00000070810 | <i>EG629219</i>     | 4.15 | 0.22  | 4.01 | 0.78 |
| ENSMUSG00000070811 | <i>C730007P19Ri</i> | 7.02 | 2.8   | 6.61 | 3.49 |
| ENSMUSG00000070873 | <i>EG232801</i>     | 2.33 | 1.36  | 1.81 | 1.41 |
| ENSMUSG00000070889 | <i>NA</i>           | 1.66 | 1.42  | 1.61 | 1.31 |
| ENSMUSG00000070923 | <i>Klhl9</i>        | 4.58 | 3.48  | 4.03 | 3.39 |
| ENSMUSG00000070934 | <i>Rraga</i>        | 5.02 | 4.72  | 4.71 | 4.42 |
| ENSMUSG00000070939 | <i>Tgfbrap1</i>     | 3.24 | 3.31  | 3.64 | 3.48 |
| ENSMUSG00000070953 | <i>Rabepk</i>       | 2.33 | 2.73  | 2.16 | 2.46 |
| ENSMUSG00000070960 | <i>NA</i>           | 2.84 | 1.88  | 1.34 | 2.38 |
| ENSMUSG00000070972 | <i>2010203O07Ri</i> | 3.72 | 2.73  | 3.19 | 2.81 |
| ENSMUSG00000070985 | <i>NA</i>           | 5.39 | 4.6   | 4.82 | 4.87 |
| ENSMUSG00000071014 | <i>Ndufb6</i>       | 6.09 | 6.31  | 6.49 | 5.9  |
| ENSMUSG00000071035 | <i>NA</i>           | 2.64 | 2.08  | 1.91 | 3.13 |
| ENSMUSG00000071042 | <i>Rasgrp3</i>      | 1.19 | 1.24  | 1.22 | 0.98 |
| ENSMUSG00000071054 | <i>NA</i>           | 3.68 | 4.29  | 4.06 | 3.97 |
| ENSMUSG00000071072 | <i>Ptges3</i>       | 4.4  | 3.74  | 4.49 | 3.99 |
| ENSMUSG00000071074 | <i>Yipf3</i>        | 6    | 6.57  | 6.01 | 6.06 |
| ENSMUSG00000071076 | <i>Jund1</i>        | 4.55 | 6.11  | 5.74 | 5.62 |
| ENSMUSG00000071078 | <i>2310073E15Ri</i> | 3.41 | 3.76  | 2.96 | 3.38 |
| ENSMUSG00000071083 | <i>NA</i>           | 1.86 | -0.16 | 0.06 | 0.27 |
| ENSMUSG00000071107 | <i>NA</i>           | 3.73 | 2.57  | 2.97 | 2.74 |
| ENSMUSG00000071141 | <i>NA</i>           | 2.25 | 1.61  | 2.01 | 3.44 |
| ENSMUSG00000071151 | <i>NA</i>           | 3.57 | 3.04  | 3.15 | 4.2  |
| ENSMUSG00000071172 | <i>Sfrs3</i>        | 3.06 | 3.04  | 2.92 | 2.22 |

|                    |                     |       |       |       |       |
|--------------------|---------------------|-------|-------|-------|-------|
| ENSMUSG00000071177 | <i>Serpina1d</i>    | 9.97  | 10.14 | 10.64 | 10.77 |
| ENSMUSG00000071178 | <i>Serpina1b</i>    | 10.53 | 10.7  | 10.92 | 11.14 |
| ENSMUSG00000071180 | <i>2810008M24R</i>  | 4.22  | 3.08  | 3.55  | 3.17  |
| ENSMUSG00000071204 | <i>NA</i>           | 2.6   | 2.68  | 2.84  | 2.7   |
| ENSMUSG00000071222 | <i>NA</i>           | 0.83  | 0.04  | 1.27  | 1.71  |
| ENSMUSG00000071226 | <i>NA</i>           | 1.98  | 1.52  | 2.14  | 1.62  |
| ENSMUSG00000071253 | <i>Slc25a16</i>     | 5.45  | 5.1   | 5.18  | 4.97  |
| ENSMUSG00000071256 | <i>Zfp213</i>       | 0.48  | 1.87  | 1.34  | 1.85  |
| ENSMUSG00000071266 | <i>1300003B13Ri</i> | 3.05  | 1.4   | 2.6   | 2.02  |
| ENSMUSG00000071267 | <i>NA</i>           | 2.43  | 1.43  | 1.77  | 1.48  |
| ENSMUSG00000071281 | <i>NA</i>           | 1.58  | 0.48  | 1.2   | 0.47  |
| ENSMUSG00000071284 | <i>NA</i>           | 1.93  | 0.33  | 1.08  | -0.77 |
| ENSMUSG00000071285 | <i>Zfp87</i>        | 2.13  | 1.64  | 1.95  | 2.44  |
| ENSMUSG00000071286 | <i>NA</i>           | 1.92  | 1.54  | 1.34  | 0.8   |
| ENSMUSG00000071291 | <i>Zfp817</i>       | 2.3   | 0.86  | 2     | 0.55  |
| ENSMUSG00000071335 | <i>NA</i>           | 4.41  | 4.07  | 3.9   | 3.59  |
| ENSMUSG00000071345 | <i>NA</i>           | 6.63  | 7.04  | 6.9   | 6.77  |
| ENSMUSG00000071350 | <i>Setdb2</i>       | 2.34  | 2.17  | 2.54  | 2.02  |
| ENSMUSG00000071351 | <i>NA</i>           | 1.75  | 0.13  | -0.08 | 1.67  |
| ENSMUSG00000071358 | <i>NA</i>           | 2.07  | 0.53  | 2.01  | 1.58  |
| ENSMUSG00000071359 | <i>Tbpl1</i>        | 2.94  | 2.09  | 2.91  | 2.79  |
| ENSMUSG00000071369 | <i>Map3k5</i>       | 4.74  | 4.2   | 3.7   | 3.4   |
| ENSMUSG00000071379 | <i>Hpcal1</i>       | 2.7   | 3.24  | 3.31  | 3.02  |
| ENSMUSG00000071415 | <i>Rpl23</i>        | 4.35  | 3.93  | 4.13  | 3.34  |
| ENSMUSG00000071451 | <i>NA</i>           | 2.37  | 3.74  | 3.83  | 3.94  |
| ENSMUSG00000071454 | <i>dtn-b</i>        | 3.94  | 4.26  | 3.93  | 3.78  |
| ENSMUSG00000071456 | <i>NA</i>           | 0.93  | 0.97  | 1.65  | 1.37  |
| ENSMUSG00000071477 | <i>Zfp777</i>       | 1.47  | 2.38  | 2.04  | 1.29  |
| ENSMUSG00000071528 | <i>Usmg5</i>        | 4.58  | 4.59  | 4.82  | 4.07  |
| ENSMUSG00000071533 | <i>Pcnp</i>         | 3.45  | 2.33  | 2.97  | 2.41  |
| ENSMUSG00000071543 | <i>NA</i>           | 1.57  | 1.92  | 0.57  | 0.91  |

|                    |                     |      |       |      |      |
|--------------------|---------------------|------|-------|------|------|
| ENSMUSG00000071547 | <i>Nt5dc2</i>       | 2.71 | 3.32  | 2.81 | 2.47 |
| ENSMUSG00000071551 | <i>Akr1c19</i>      | 4.25 | 3.33  | 3.39 | 3.45 |
| ENSMUSG00000071584 | <i>NA</i>           | 3.91 | 3.7   | 4.31 | 4.15 |
| ENSMUSG00000071632 | <i>2510002D24Rt</i> | 3.43 | 3.72  | 3.11 | 3.21 |
| ENSMUSG00000071633 | <i>EG240549</i>     | 7.16 | 7.05  | 6.54 | 6.25 |
| ENSMUSG00000071637 | <i>Cebpd</i>        | 2.21 | 3.08  | 2.76 | 3.01 |
| ENSMUSG00000071640 | <i>Stxbp3b</i>      | 0.76 | -0.75 | 1.03 | 0.95 |
| ENSMUSG00000071644 | <i>Eef1g</i>        | 2.8  | 2.26  | 2.4  | 2.55 |
| ENSMUSG00000071645 | <i>Tut1</i>         | 2.47 | 2.93  | 2.63 | 2.65 |
| ENSMUSG00000071646 | <i>Mta2</i>         | 4.66 | 4.73  | 4.56 | 4.41 |
| ENSMUSG00000071647 | <i>Eml3</i>         | 2.55 | 3.37  | 2.99 | 2.69 |
| ENSMUSG00000071648 | <i>Rom1</i>         | 1.24 | 1.17  | 0.96 | 0.15 |
| ENSMUSG00000071649 | <i>B3gat3</i>       | 4.73 | 5.18  | 4.83 | 4.72 |
| ENSMUSG00000071650 | <i>Ganab</i>        | 6.43 | 6.63  | 6.26 | 6.19 |
| ENSMUSG00000071652 | <i>Ints5</i>        | 2.68 | 3.13  | 2.6  | 2.93 |
| ENSMUSG00000071653 | <i>1810009A15Ri</i> | 3.74 | 4.36  | 3.85 | 3.98 |
| ENSMUSG00000071654 | <i>NA</i>           | 4.38 | 4.95  | 4.8  | 4.71 |
| ENSMUSG00000071655 | <i>AK172428</i>     | 6.98 | 6.73  | 6.76 | 6.6  |
| ENSMUSG00000071657 | <i>Gng3lg</i>       | 5.35 | 5.78  | 5.32 | 5.22 |
| ENSMUSG00000071659 | <i>Hnrpul2</i>      | 4.76 | 4.7   | 4.49 | 4.18 |
| ENSMUSG00000071660 | <i>Ttc9c</i>        | 3.19 | 2.61  | 3.08 | 2.9  |
| ENSMUSG00000071662 | <i>Polr2g</i>       | 4.21 | 3.28  | 4.33 | 4.26 |
| ENSMUSG00000071711 | <i>Mpst</i>         | 5.44 | 6.27  | 5.96 | 5.71 |
| ENSMUSG00000071713 | <i>Csf2rb</i>       | 1.1  | 0.92  | 1.17 | 0.53 |
| ENSMUSG00000071757 | <i>Zhx2</i>         | 1.98 | 2.33  | 2.53 | 2.27 |
| ENSMUSG00000071791 | <i>NA</i>           | 5.44 | 4.24  | 4.7  | 6.1  |
| ENSMUSG00000071856 | <i>Mcc</i>          | 2.6  | 1.9   | 2.57 | 2.37 |
| ENSMUSG00000072030 | <i>NA</i>           | 1.57 | 3.04  | 3.01 | 2.1  |
| ENSMUSG00000072082 | <i>Ccnf</i>         | 1.09 | 1.7   | 1.41 | 1.62 |
| ENSMUSG00000072115 | <i>Ang</i>          | 7.59 | 8.01  | 8.15 | 8.15 |
| ENSMUSG00000072294 | <i>Klf12</i>        | 3.51 | 2.63  | 3.14 | 3.03 |

|                    |                  |       |      |      |      |
|--------------------|------------------|-------|------|------|------|
| ENSMUSG00000072407 | NA               | 2.8   | 2.94 | 3.6  | 4.28 |
| ENSMUSG00000072493 | NA               | 1.09  | 1.46 | 1.15 | 0.96 |
| ENSMUSG00000072494 | NA               | -0.06 | 0.25 | 1.11 | 1.37 |
| ENSMUSG00000072501 | <i>Phf20l1</i>   | 2.81  | 1.71 | 2.39 | 2.01 |
| ENSMUSG00000072565 | NA               | 2.23  | 1.71 | 2.04 | 3.19 |
| ENSMUSG00000072568 | NA               | 3     | 2.69 | 2.77 | 1.86 |
| ENSMUSG00000072582 | <i>Ptrh2</i>     | 2.55  | 2.35 | 2.33 | 2.23 |
| ENSMUSG00000072593 | NA               | 1.47  | 1.41 | 1.62 | 1.73 |
| ENSMUSG00000072594 | NA               | 3.54  | 3.13 | 3.41 | 4.93 |
| ENSMUSG00000072620 | <i>Slfn2</i>     | 1.81  | 1.11 | 1.39 | 1.26 |
| ENSMUSG00000072625 | <i>Gdf2</i>      | 3.62  | 3.78 | 3.64 | 3.52 |
| ENSMUSG00000072629 | NA               | 1.16  | 1.78 | 1.39 | 1.41 |
| ENSMUSG00000072641 | NA               | 2.77  | 1.01 | 0.22 | 1.78 |
| ENSMUSG00000072657 | NA               | 5.37  | 4.9  | 5.58 | 4.64 |
| ENSMUSG00000072664 | <i>Ugt3a1</i>    | 4.73  | 3.93 | 4.42 | 3.71 |
| ENSMUSG00000072673 | NA               | 4.24  | 4.67 | 4.37 | 3.84 |
| ENSMUSG00000072682 | NA               | 3.19  | 2.91 | 3.18 | 2.67 |
| ENSMUSG00000072684 | NA               | 4.4   | 3.96 | 3.99 | 3.52 |
| ENSMUSG00000072692 | NA               | 2.38  | 0.85 | 2.39 | 4.12 |
| ENSMUSG00000072693 | NA               | 3.98  | 2.93 | 4.15 | 3.5  |
| ENSMUSG00000072698 | NA               | 4.39  | 2.65 | 4.45 | 3.75 |
| ENSMUSG00000072704 | NA               | 6     | 5.01 | 5.72 | 5.22 |
| ENSMUSG00000072734 | NA               | -0.17 | 0.33 | 1.25 | 1.04 |
| ENSMUSG00000072772 | <i>Grc10</i>     | 6.43  | 6.59 | 6.68 | 6.75 |
| ENSMUSG00000072788 | NA               | 2.69  | 2.92 | 2.76 | 2.12 |
| ENSMUSG00000072809 | NA               | 1.65  | 1.48 | 0.85 | 0.81 |
| ENSMUSG00000072825 | <i>AW555464</i>  | 2.77  | 3.91 | 3.32 | 3.37 |
| ENSMUSG00000072836 | NA               | 0.65  | 0.51 | 1.21 | 0.05 |
| ENSMUSG00000072837 | NA               | 4.78  | 5.07 | 5.16 | 4.96 |
| ENSMUSG00000072847 | NA               | 1.17  | 0.62 | 1.45 | 0.54 |
| ENSMUSG00000072849 | <i>Serpina1e</i> | 6.94  | 8.63 | 7.05 | 8.2  |

|                    |                     |      |       |      |        |
|--------------------|---------------------|------|-------|------|--------|
| ENSMUSG00000072853 | <i>NA</i>           | 3.22 | 3.57  | 2.7  | 3.32   |
| ENSMUSG00000072889 | <i>Nfx1l</i>        | 1.8  | 2.29  | 1.62 | 1.67   |
| ENSMUSG00000072896 | <i>NA</i>           | 1.16 | 1.28  | 0.96 | 1.33   |
| ENSMUSG00000072933 | <i>NA</i>           | 5.15 | 5.91  | 5.15 | 5.06   |
| ENSMUSG00000072941 | <i>Sod3</i>         | 5.7  | 5.81  | 6.05 | 5.79   |
| ENSMUSG00000072946 | <i>Zadh1</i>        | 5.28 | 4.86  | 5.24 | 4.88   |
| ENSMUSG00000072949 | <i>Acot1</i>        | 6.62 | 5.71  | 5.85 | 5.15   |
| ENSMUSG00000072955 | <i>LOC666244</i>    | 1.47 | 0.51  | 0.95 | 0.32   |
| ENSMUSG00000073002 | <i>Vamp5</i>        | 1.24 | 1.78  | 1.63 | 1.79   |
| ENSMUSG00000073005 | <i>NA</i>           | 0.96 | -1.81 | 1.13 | #NAME? |
| ENSMUSG00000073019 | <i>NA</i>           | 2.24 | 2.38  | 1.62 | 0.96   |
| ENSMUSG00000073074 | <i>NA</i>           | 2.44 | 1.4   | 2.04 | 2.4    |
| ENSMUSG00000073096 | <i>Lrrc61</i>       | 6.13 | 5.98  | 6.36 | 6.34   |
| ENSMUSG00000073114 | <i>NA</i>           | 2.58 | 2.27  | 2.35 | 1.9    |
| ENSMUSG00000073126 | <i>Atxn7l4</i>      | 2.18 | 1.58  | 2.04 | 1.88   |
| ENSMUSG00000073131 | <i>2610030H06R1</i> | 3.57 | 2.34  | 3.11 | 2.33   |
| ENSMUSG00000073139 | <i>AK197085</i>     | 4.59 | 3.86  | 4.29 | 3.84   |
| ENSMUSG00000073143 | <i>NA</i>           | 3.27 | 2.15  | 2.82 | 2.19   |
| ENSMUSG00000073147 | <i>NA</i>           | 0.85 | 1.45  | 1.4  | 1.79   |
| ENSMUSG00000073155 | <i>NA</i>           | 4.82 | 5.62  | 5.1  | 5.29   |
| ENSMUSG00000073198 | <i>NA</i>           | 2.23 | 0.65  | 1.25 | 1.87   |
| ENSMUSG00000073228 | <i>NA</i>           | 1.72 | 1.27  | 1.55 | 0.99   |
| ENSMUSG00000073240 | <i>NA</i>           | 2.86 | 2.82  | 2.24 | 2.8    |
| ENSMUSG00000073291 | <i>NA</i>           | 1.72 | 1.64  | 0.46 | 0.91   |
| ENSMUSG00000073387 | <i>Med20</i>        | 2.8  | 3     | 2.89 | 2.82   |
| ENSMUSG00000073393 | <i>NA</i>           | 1.62 | 1.16  | 1.6  | 1.15   |
| ENSMUSG00000073406 | <i>H2-B1</i>        | 2.26 | 2.45  | 2.12 | 2.51   |
| ENSMUSG00000073409 | <i>H2-Q6</i>        | 2.14 | 2.43  | 2.56 | 2.23   |
| ENSMUSG00000073411 | <i>H2-B2</i>        | 7.61 | 8.03  | 7.77 | 7.69   |
| ENSMUSG00000073412 | <i>Lst1</i>         | 1.08 | 1.27  | 2.12 | 2.98   |
| ENSMUSG00000073416 | <i>NA</i>           | 1.43 | 2.39  | 3.61 | 5.24   |



|                    |                     |      |       |      |       |
|--------------------|---------------------|------|-------|------|-------|
| ENSMUSG00000073418 | <i>C4b</i>          | 7.34 | 8.18  | 7.64 | 7.68  |
| ENSMUSG00000073421 | <i>H2-Ab1</i>       | 5.61 | 5.25  | 5.58 | 5.18  |
| ENSMUSG00000073422 | <i>H2-Ke6</i>       | 5.53 | 5.75  | 5.68 | 5.48  |
| ENSMUSG00000073423 | <i>Zfp414</i>       | 1.84 | 2.16  | 2.22 | 1.84  |
| ENSMUSG00000073424 | <i>Cyp4f15</i>      | 6.29 | 6.69  | 6.64 | 6.34  |
| ENSMUSG00000073435 | <i>Nme3</i>         | 4.02 | 4.98  | 4.43 | 4.37  |
| ENSMUSG00000073436 | <i>NA</i>           | 1.63 | 2.5   | 1.65 | 1.7   |
| ENSMUSG00000073437 | <i>NA</i>           | 4.73 | 5.16  | 5.06 | 4.64  |
| ENSMUSG00000073440 | <i>NA</i>           | 4.25 | 2.77  | 3.24 | 2.93  |
| ENSMUSG00000073463 | <i>NA</i>           | 2.29 | 0.31  | 1.68 | 1.2   |
| ENSMUSG00000073468 | <i>5630401J11Ri</i> | 0.74 | 0.92  | 1.69 | 0.92  |
| ENSMUSG00000073469 | <i>Rnaset2a</i>     | 1.96 | 1.57  | 2.09 | 1.88  |
| ENSMUSG00000073481 | <i>Mosc2</i>        | 7.98 | 8.39  | 8.32 | 8.05  |
| ENSMUSG00000073520 | <i>NA</i>           | 4.03 | 2.68  | 3.34 | 2.91  |
| ENSMUSG00000073527 | <i>NA</i>           | 2.96 | 2.81  | 3    | 1.94  |
| ENSMUSG00000073534 | <i>NA</i>           | 1.08 | 1.89  | 0.81 | 1.18  |
| ENSMUSG00000073542 | <i>Cep76</i>        | 1.34 | 0.61  | 1.31 | 1.35  |
| ENSMUSG00000073543 | <i>Chmp1b</i>       | 4.33 | 4.13  | 4.17 | 4.22  |
| ENSMUSG00000073552 | <i>NA</i>           | 2.03 | 2.09  | 1.72 | 2.32  |
| ENSMUSG00000073555 | <i>EG240327</i>     | 5.76 | 3.59  | 5.18 | 4.02  |
| ENSMUSG00000073563 | <i>Csnk1g3</i>      | 3.87 | 3.15  | 3.82 | 3.08  |
| ENSMUSG00000073565 | <i>Prr16</i>        | 4.79 | 3.96  | 4.09 | 3.89  |
| ENSMUSG00000073599 | <i>1110006O17Ri</i> | 0.87 | 1.08  | 1.1  | 0.67  |
| ENSMUSG00000073600 | <i>NA</i>           | 1.3  | 1.71  | 1.77 | 1.39  |
| ENSMUSG00000073609 | <i>D2hgdh</i>       | 1.83 | 2.19  | 2.12 | 1.56  |
| ENSMUSG00000073611 | <i>NA</i>           | 2.93 | 3.15  | 2.85 | 2.66  |
| ENSMUSG00000073616 | <i>NA</i>           | 5.74 | 4     | 4.81 | 4.78  |
| ENSMUSG00000073633 | <i>Fbxo36</i>       | 3.09 | 2.98  | 3.3  | 3.03  |
| ENSMUSG00000073635 | <i>NA</i>           | 1.16 | -0.11 | 0.34 | -0.08 |
| ENSMUSG00000073638 | <i>NA</i>           | 1.88 | 1.37  | 1.79 | 0.98  |
| ENSMUSG00000073639 | <i>Rab18</i>        | 6.39 | 5.52  | 5.91 | 5.58  |

|                    |                     |      |      |      |      |
|--------------------|---------------------|------|------|------|------|
| ENSMUSG00000073643 | <i>Wdfyl</i>        | 2.98 | 2.55 | 3.11 | 2.48 |
| ENSMUSG00000073647 | <i>NA</i>           | 1.46 | 0.63 | 0.34 | 1.33 |
| ENSMUSG00000073651 | <i>NA</i>           | 2.41 | 2.39 | 1.91 | 2.35 |
| ENSMUSG00000073652 | <i>NA</i>           | 2.86 | 3.51 | 3.43 | 3.42 |
| ENSMUSG00000073664 | <i>AK041465</i>     | 1.59 | 0.36 | 0.99 | 0.48 |
| ENSMUSG00000073676 | <i>Hspe1</i>        | 5.26 | 5.53 | 5.5  | 5.26 |
| ENSMUSG00000073678 | <i>NA</i>           | 1.54 | 0.48 | 1.89 | 0.69 |
| ENSMUSG00000073684 | <i>2610002J02Ri</i> | 1.42 | 2.87 | 2.6  | 2.46 |
| ENSMUSG00000073700 | <i>Klhl21</i>       | 4.33 | 4.55 | 4.67 | 4.26 |
| ENSMUSG00000073702 | <i>M75</i>          | 1.23 | 0.04 | 0.67 | 0.34 |
| ENSMUSG00000073707 | <i>NA</i>           | 1.88 | 1.48 | 1.88 | 1.52 |
| ENSMUSG00000073719 | <i>NA</i>           | 3.67 | 4    | 3.52 | 3.58 |
| ENSMUSG00000073725 | <i>Lmbrd1</i>       | 4.52 | 4    | 4.37 | 3.96 |
| ENSMUSG00000073731 | <i>NA</i>           | 3.67 | 4.24 | 3.86 | 3.78 |
| ENSMUSG00000073738 | <i>NA</i>           | 3.2  | 3.2  | 1.4  | 2.82 |
| ENSMUSG00000073755 | <i>5730409E04Ri</i> | 1.58 | 1.52 | 1.42 | 1.39 |
| ENSMUSG00000073775 | <i>Kti12</i>        | 3.85 | 4.91 | 3.89 | 4.09 |
| ENSMUSG00000073778 | <i>NA</i>           | 1.03 | 1.44 | 0.91 | 0.75 |
| ENSMUSG00000073787 | <i>NA</i>           | 2.82 | 2.98 | 3.38 | 3.25 |
| ENSMUSG00000073792 | <i>Alg6</i>         | 2.09 | 1.01 | 1.44 | 1.23 |
| ENSMUSG00000073832 | <i>Mup1</i>         | 0.84 | 0.16 | 1.51 | 2.33 |
| ENSMUSG00000073835 | <i>NA</i>           | 2.03 | -2.5 | 1.37 | 1.11 |
| ENSMUSG00000073838 | <i>Tufm</i>         | 2.48 | 2.96 | 3    | 2.99 |
| ENSMUSG00000073849 | <i>NA</i>           | 1.51 | 2.11 | 2.2  | 1.65 |
| ENSMUSG00000073852 | <i>NA</i>           | 4.16 | 3.61 | 3.53 | 2.57 |
| ENSMUSG00000073859 | <i>NA</i>           | 3.24 | 1.71 | 1.89 | 2.08 |
| ENSMUSG00000073889 | <i>Il1ral</i>       | 1.97 | 2.48 | 1.7  | 1.53 |
| ENSMUSG00000073910 | <i>Mobkl2b</i>      | 3.57 | 3.5  | 3.92 | 3.63 |
| ENSMUSG00000073940 | <i>Hbb-b1</i>       | 2.5  | 4.96 | 5.83 | 6.07 |
| ENSMUSG00000073982 | <i>Rhog</i>         | 4.1  | 4.4  | 4.42 | 4.21 |
| ENSMUSG00000073985 | <i>NA</i>           | 0.25 | 0.94 | 1.65 | 0.13 |

|                    |                     |       |       |       |       |
|--------------------|---------------------|-------|-------|-------|-------|
| ENSMUSG00000073987 | <i>Ggh</i>          | 4.52  | 3.77  | 4.19  | 3.57  |
| ENSMUSG00000073988 | <i>Ttpa</i>         | 8.67  | 7.13  | 8.02  | 7.33  |
| ENSMUSG00000074005 | <i>NA</i>           | 4.67  | 4.94  | 4.88  | 4.26  |
| ENSMUSG00000074030 | <i>Exoc8</i>        | 1.57  | 2.18  | 1.42  | 1.43  |
| ENSMUSG00000074040 | <i>NA</i>           | 0.59  | 1.65  | 1.23  | 1.54  |
| ENSMUSG00000074044 | <i>NA</i>           | 1.96  | 3.16  | 3.8   | 3.19  |
| ENSMUSG00000074052 | <i>BC048644</i>     | 4.3   | 4.54  | 4.5   | 4.18  |
| ENSMUSG00000074054 | <i>NA</i>           | 1.22  | 0     | 0.17  | 1.11  |
| ENSMUSG00000074063 | <i>Osgin1</i>       | 4.14  | 5.52  | 4.5   | 5.09  |
| ENSMUSG00000074064 | <i>Mlycd</i>        | 5.73  | 6.38  | 6.09  | 5.92  |
| ENSMUSG00000074071 | <i>EG434197</i>     | 2.98  | 2.8   | 3.65  | 3.2   |
| ENSMUSG00000074085 | <i>NA</i>           | 2.4   | 2.98  | 2.79  | 2.54  |
| ENSMUSG00000074088 | <i>Wdr57</i>        | 2.54  | 2.88  | 2.91  | 2.3   |
| ENSMUSG00000074093 | <i>NA</i>           | 3.42  | 2.59  | 2.48  | 2.21  |
| ENSMUSG00000074102 | <i>NA</i>           | 2.94  | 2.76  | 3.3   | 3.35  |
| ENSMUSG00000074106 | <i>NA</i>           | 2.31  | 3.8   | 3.42  | 2.8   |
| ENSMUSG00000074115 | <i>Saal</i>         | 5.59  | 6.38  | 6.21  | 5.71  |
| ENSMUSG00000074129 | <i>Flt3l</i>        | 1.45  | 1.9   | 2.1   | 1.4   |
| ENSMUSG00000074141 | <i>Il4i1</i>        | 1.15  | 2     | 1.34  | 1.76  |
| ENSMUSG00000074151 | <i>AI451557</i>     | 1.81  | 0.73  | 1.47  | 0.79  |
| ENSMUSG00000074157 | <i>NA</i>           | 4.24  | 3.55  | 4.03  | 3.67  |
| ENSMUSG00000074166 | <i>AW146154</i>     | 1.15  | 0.3   | 0.47  | -0.24 |
| ENSMUSG00000074170 | <i>Plekhfl</i>      | 3.29  | 2.71  | 3.8   | 3.13  |
| ENSMUSG00000074182 | <i>2410019A14Ri</i> | 1.96  | 2.04  | 1.85  | 1.37  |
| ENSMUSG00000074203 | <i>NA</i>           | 2.61  | 3.41  | 3.16  | 3.03  |
| ENSMUSG00000074207 | <i>Adhl</i>         | 10.46 | 10.57 | 10.06 | 10.13 |
| ENSMUSG00000074210 | <i>0610010E21Ri</i> | 2     | 2.65  | 2.75  | 2.56  |
| ENSMUSG00000074211 | <i>NA</i>           | 3.35  | 4.04  | 4.12  | 3.9   |
| ENSMUSG00000074212 | <i>NA</i>           | 2.63  | 2.41  | 2.25  | 2.27  |
| ENSMUSG00000074218 | <i>Cox7al</i>       | 1.81  | 1.66  | 2.14  | 3     |
| ENSMUSG00000074219 | <i>NA</i>           | -0.26 | 0.85  | 1.67  | 1.68  |

|                    |                     |        |        |       |        |
|--------------------|---------------------|--------|--------|-------|--------|
| ENSMUSG00000074221 | <i>Zfp568</i>       | 1.47   | 1.7    | 1.64  | 1.18   |
| ENSMUSG00000074227 | <i>Spint2</i>       | 5.84   | 6.66   | 6.16  | 6.03   |
| ENSMUSG00000074238 | <i>BC002199</i>     | 4.26   | 3.62   | 3.94  | 3.57   |
| ENSMUSG00000074246 | <i>NA</i>           | 3.96   | 4.47   | 4.37  | 4.69   |
| ENSMUSG00000074247 | <i>NA</i>           | 3.42   | 4.2    | 3.16  | 3.27   |
| ENSMUSG00000074254 | <i>Cyp2a4</i>       | 7.71   | 7.66   | 8.01  | 8.05   |
| ENSMUSG00000074264 | <i>Amy1</i>         | 7.85   | 6.96   | 7.61  | 7.14   |
| ENSMUSG00000074269 | <i>NA</i>           | 1.59   | 2.33   | 1.42  | 1.35   |
| ENSMUSG00000074272 | <i>Ceacam1</i>      | 6.35   | 5.97   | 6.3   | 5.88   |
| ENSMUSG00000074280 | <i>NA</i>           | #NAME? | 3.6    | 1.68  | 1.38   |
| ENSMUSG00000074284 | <i>NA</i>           | 3.31   | 2.97   | 3.47  | 3.71   |
| ENSMUSG00000074285 | <i>NA</i>           | 4.01   | 3.46   | 4.52  | 3.99   |
| ENSMUSG00000074336 | <i>Apoc4</i>        | 9.82   | 10.22  | 10.46 | 10.28  |
| ENSMUSG00000074360 | <i>NA</i>           | 1.36   | 1.35   | 1.82  | 0.96   |
| ENSMUSG00000074363 | <i>NA</i>           | 0.53   | 1.22   | 1.04  | 1.14   |
| ENSMUSG00000074373 | <i>NA</i>           | 9.33   | 9.99   | 9.74  | 9.52   |
| ENSMUSG00000074375 | <i>NA</i>           | 1.14   | #NAME? | 4.38  | #NAME? |
| ENSMUSG00000074377 | <i>NA</i>           | 2.03   | -2     | 2.5   | -1     |
| ENSMUSG00000074396 | <i>Pex11b</i>       | 3.89   | 3.85   | 3.81  | 3.61   |
| ENSMUSG00000074398 | <i>NA</i>           | 4.16   | 3.51   | 3.67  | 3.97   |
| ENSMUSG00000074405 | <i>6430526N21Ri</i> | 1.24   | 2.13   | 1.74  | 1.76   |
| ENSMUSG00000074406 | <i>Zfp628</i>       | 1.12   | 1.8    | 1.26  | 1      |
| ENSMUSG00000074457 | <i>S100a16</i>      | 4.38   | 4.85   | 4.29  | 4.19   |
| ENSMUSG00000074460 | <i>NA</i>           | 1.7    | 2.34   | 1.75  | 2.18   |
| ENSMUSG00000074466 | <i>NA</i>           | 1.19   | 1.06   | 1.28  | 1.66   |
| ENSMUSG00000074476 | <i>Spc24</i>        | 2.7    | 2.97   | 2.76  | 2.59   |
| ENSMUSG00000074479 | <i>NA</i>           | 5.21   | 2.46   | 4.43  | 3.84   |
| ENSMUSG00000074482 | <i>NA</i>           | 2.35   | 1.62   | 2     | 1.68   |
| ENSMUSG00000074491 | <i>Clec4g</i>       | 5.11   | 5.8    | 5.19  | 5.17   |
| ENSMUSG00000074498 | <i>NA</i>           | 4.97   | 4.98   | 5.34  | 4.83   |
| ENSMUSG00000074513 | <i>Arfip1</i>       | 4.09   | 2.87   | 3.38  | 2.95   |

|                    |              |      |       |      |       |
|--------------------|--------------|------|-------|------|-------|
| ENSMUSG00000074557 | NA           | 1.37 | 1.1   | 0.84 | -1.33 |
| ENSMUSG00000074576 | NA           | 1.72 | 2.06  | 2.03 | 1.48  |
| ENSMUSG00000074578 | 1500012F01Ri | 3.91 | 3.67  | 4.61 | 4.41  |
| ENSMUSG00000074582 | Arfgef2      | 3.55 | 3.82  | 3.72 | 3.45  |
| ENSMUSG00000074598 | NA           | 2.68 | 0.44  | 0.95 | -1.48 |
| ENSMUSG00000074622 | Mafb         | 5.86 | 5.16  | 6.02 | 5.85  |
| ENSMUSG00000074623 | Gm826        | 2.5  | 1.09  | 2.68 | 1.65  |
| ENSMUSG00000074634 | EG633640     | 2.13 | 0.25  | 1.63 | 1.39  |
| ENSMUSG00000074636 | NA           | 2.09 | 0.23  | 0.56 | 1.73  |
| ENSMUSG00000074639 | BC089597     | 7.91 | 7.49  | 7.68 | 7.4   |
| ENSMUSG00000074642 | NA           | 3.05 | 2.72  | 2.62 | 2.89  |
| ENSMUSG00000074643 | Rbm12        | 3.14 | 2.87  | 2.82 | 2.27  |
| ENSMUSG00000074649 | NA           | 1.75 | 1.42  | 2.06 | 1.57  |
| ENSMUSG00000074656 | Eif2s2       | 3.31 | 2.57  | 2.69 | 2.49  |
| ENSMUSG00000074661 | NA           | 0.42 | -0.55 | 1.18 | 0.28  |
| ENSMUSG00000074698 | Csnk2a1      | 4.43 | 3.83  | 4.21 | 3.55  |
| ENSMUSG00000074700 | NA           | 1.3  | -0.69 | 1.17 | 0.53  |
| ENSMUSG00000074732 | NA           | 1.78 | 0.86  | 1.23 | 0.53  |
| ENSMUSG00000074733 | NA           | 2.09 | 1.54  | 2.02 | 1.97  |
| ENSMUSG00000074743 | Thbd         | 1.5  | 1.58  | 1.02 | 1.15  |
| ENSMUSG00000074746 | Pdzd8        | 3.53 | 3.19  | 3.41 | 3.11  |
| ENSMUSG00000074748 | 4921506J03Ri | 5.19 | 5.76  | 5.31 | 5.19  |
| ENSMUSG00000074749 | Gm114        | 3.5  | 3.58  | 3.67 | 3.45  |
| ENSMUSG00000074754 | Gm561        | 4.79 | 4.1   | 5.25 | 4.82  |
| ENSMUSG00000074768 | BHMT         | 5.7  | 5.16  | 5.92 | 4.85  |
| ENSMUSG00000074781 | Ube2n        | 2.33 | 1.39  | 1.7  | 1.43  |
| ENSMUSG00000074782 | NA           | 1.32 | 1.23  | 1.79 | 1.88  |
| ENSMUSG00000074785 | Plxnc1       | 3.05 | 2.78  | 2.35 | 2.3   |
| ENSMUSG00000074794 | mKIAA1376    | 5.38 | 4.5   | 5.1  | 4.46  |
| ENSMUSG00000074797 | Itpa         | 3.07 | 2.68  | 3.06 | 2.76  |
| ENSMUSG00000074807 | NA           | 0.8  | 2.46  | 1.79 | 2.24  |

|                    |                      |      |       |      |      |
|--------------------|----------------------|------|-------|------|------|
| ENSMUSG00000074824 | NA                   | 1.48 | 0.27  | 0.89 | 0.27 |
| ENSMUSG00000074825 | NA                   | 2.14 | 1.91  | 1.95 | 1.48 |
| ENSMUSG00000074828 | NA                   | 7.19 | 6.8   | 7.01 | 6.84 |
| ENSMUSG00000074861 | NA                   | 1.26 | 1.62  | 1.88 | 1.69 |
| ENSMUSG00000074873 | NA                   | 1.05 | 0.38  | 1    | 0.39 |
| ENSMUSG00000074874 | NA                   | 2.31 | 0.84  | 1.35 | 1.37 |
| ENSMUSG00000074876 | NA                   | 1.25 | 2.69  | 2.13 | 1.93 |
| ENSMUSG00000074880 | NA                   | 2.73 | 3.36  | 2.79 | 2.61 |
| ENSMUSG00000074882 | <i>Cyp2c68</i>       | 7.01 | 6.5   | 6.5  | 6.29 |
| ENSMUSG00000074884 | <i>Serf2</i>         | 4.07 | 3.72  | 4.28 | 3.94 |
| ENSMUSG00000074886 | <i>Grk6</i>          | 2.67 | 2.91  | 2.98 | 2.43 |
| ENSMUSG00000074890 | NA                   | 1.86 | 2.3   | 2.02 | 1.77 |
| ENSMUSG00000074896 | <i>Ifit3</i>         | 2.36 | 1.88  | 1.45 | 2.42 |
| ENSMUSG00000074903 | NA                   | 1.1  | 0.54  | 0    | 1.5  |
| ENSMUSG00000074909 | <i>Ranbp6</i>        | 2.7  | 2.12  | 2.36 | 1.92 |
| ENSMUSG00000074910 | NA                   | 1.12 | -0.82 | 0.37 | 0.59 |
| ENSMUSG00000074917 | NA                   | 3.58 | 3.92  | 2.52 | 1.97 |
| ENSMUSG00000074922 | <i>2900009I07Rik</i> | 3.59 | 4.37  | 3.99 | 3.86 |
| ENSMUSG00000074925 | NA                   | 0.58 | 1.01  | 1.24 | 0.7  |
| ENSMUSG00000074931 | NA                   | 1.23 | 1.16  | 0.89 | 2.06 |
| ENSMUSG00000074940 | NA                   | 3.09 | 1.25  | 2.74 | 2.29 |
| ENSMUSG00000074984 | NA                   | 2.83 | 0.82  | 1.19 | 1.37 |
| ENSMUSG00000074994 | NA                   | 2.67 | 1.91  | 2.34 | 2.06 |
| ENSMUSG00000075000 | <i>Nrbf2</i>         | 2.67 | 2.72  | 2.39 | 2.3  |
| ENSMUSG00000075010 | NA                   | 7.82 | 6.33  | 7.07 | 7.34 |
| ENSMUSG00000075043 | <i>0610006I08Rik</i> | 4.45 | 4.83  | 4.54 | 4.28 |
| ENSMUSG00000075053 | NA                   | 1.64 | 0.49  | 1.34 | 1.8  |
| ENSMUSG00000075054 | <i>1600012F09Rik</i> | 1.45 | 1.15  | 1.7  | 1.97 |
| ENSMUSG00000075216 | NA                   | 3.71 | 3.42  | 4.08 | 3.78 |
| ENSMUSG00000075225 | <i>5033413D22Rik</i> | 2.07 | 1.44  | 1.2  | 0.49 |
| ENSMUSG00000075227 | <i>Znhit2</i>        | 4.01 | 4.69  | 4.44 | 4.42 |

|                    |                   |      |      |      |       |
|--------------------|-------------------|------|------|------|-------|
| ENSMUSG00000075229 | <i>Ccdc58</i>     | 3.99 | 3.72 | 4.35 | 3.84  |
| ENSMUSG00000075232 | <i>Amd2</i>       | 1.47 | 0.9  | 1.33 | 1     |
| ENSMUSG00000075254 | <i>Hegl</i>       | 1.76 | 2.03 | 1.68 | 1.34  |
| ENSMUSG00000075256 | <i>Cerkl</i>      | 1.78 | 0.48 | 1.48 | 0.76  |
| ENSMUSG00000075273 | <i>Ttc30b</i>     | 1.72 | 0.73 | 1.19 | 0.67  |
| ENSMUSG00000075279 | <i>NA</i>         | 3.32 | 2.86 | 3.09 | 3.91  |
| ENSMUSG00000075284 | <i>Wipfl</i>      | 1.12 | 0.76 | 0.93 | 0.65  |
| ENSMUSG00000075285 | <i>NA</i>         | 6.05 | 4.51 | 5.23 | 4.93  |
| ENSMUSG00000075324 | <i>Fign</i>       | 0.82 | 0.47 | 1.29 | 0.98  |
| ENSMUSG00000075327 | <i>Zbtb2</i>      | 1.57 | 1.04 | 1.25 | 0.85  |
| ENSMUSG00000075368 | <i>NA</i>         | 2.88 | 2.16 | 2.67 | 0.33  |
| ENSMUSG00000075376 | <i>Rc3h2</i>      | 2.56 | 1.27 | 2.14 | 1.44  |
| ENSMUSG00000075391 | <i>NA</i>         | 5.64 | 5.66 | 5.46 | 6.18  |
| ENSMUSG00000075401 | <i>NA</i>         | 2.87 | 3.04 | 3.01 | 2.74  |
| ENSMUSG00000075411 | <i>NA</i>         | 0.33 | 1.64 | 1.5  | -0.46 |
| ENSMUSG00000075415 | <i>Fnbpl</i>      | 0.96 | 1.02 | 1.25 | 0.9   |
| ENSMUSG00000075417 | <i>NA</i>         | 1.01 | 2.14 | 1.83 | 2.01  |
| ENSMUSG00000075419 | <i>Dolk</i>       | 3.52 | 4.03 | 3.32 | 3.04  |
| ENSMUSG00000075463 | <i>NA</i>         | 0.45 | 1.31 | 1.3  | 1.48  |
| ENSMUSG00000075467 | <i>D2Bwgl335e</i> | 3.96 | 4.87 | 4.35 | 3.93  |
| ENSMUSG00000075470 | <i>Alg10b</i>     | 3.76 | 3.3  | 3.33 | 3.01  |
| ENSMUSG00000075472 | <i>NA</i>         | 4.73 | 2.68 | 3.92 | 3.49  |
| ENSMUSG00000075486 | <i>Commd6</i>     | 5.55 | 5    | 5.27 | 5.12  |
| ENSMUSG00000075507 | <i>NA</i>         | 2.27 | 1.67 | 2.04 | 1.73  |
| ENSMUSG00000075511 | <i>NA</i>         | 1.22 | 0.9  | 1.67 | 0.99  |
| ENSMUSG00000075514 | <i>NA</i>         | 0.59 | 0.7  | 1.15 | 0.59  |
| ENSMUSG00000075517 | <i>NA</i>         | 5    | 5.25 | 5.04 | 4.83  |
| ENSMUSG00000075528 | <i>Aarsdl</i>     | 2.69 | 3    | 2.95 | 2.51  |
| ENSMUSG00000075536 | <i>NA</i>         | 0.06 | -0.3 | 1.03 | 0.12  |
| ENSMUSG00000075543 | <i>Prhoxnb</i>    | 5.75 | 6.15 | 5.53 | 5.81  |
| ENSMUSG00000075551 | <i>Cyp3a41a</i>   | 2.1  | 0.26 | 0.77 | -0.81 |

|                    |                     |       |        |       |       |
|--------------------|---------------------|-------|--------|-------|-------|
| ENSMUSG00000075552 | NA                  | 4.54  | 0.75   | 3.84  | 2.59  |
| ENSMUSG00000075558 | NA                  | -0.23 | 1.33   | 1.51  | 1.03  |
| ENSMUSG00000075562 | NA                  | 2.44  | 3.96   | 3.8   | 3.35  |
| ENSMUSG00000075576 | NA                  | 1.08  | 1.67   | 0.88  | 1.18  |
| ENSMUSG00000075577 | NA                  | 2.49  | 3.04   | 2.55  | 2.65  |
| ENSMUSG00000075578 | NA                  | 0.8   | 2.51   | 1.2   | 1.35  |
| ENSMUSG00000075582 | NA                  | 6.55  | 7.12   | 6.93  | 7.05  |
| ENSMUSG00000075590 | <i>Nrbp2</i>        | 4.08  | 4.74   | 4.57  | 4.38  |
| ENSMUSG00000075591 | NA                  | 4.11  | 3.37   | 3.62  | 4.51  |
| ENSMUSG00000075595 | <i>Zfp652</i>       | 3.3   | 2.75   | 2.96  | 2.62  |
| ENSMUSG00000075602 | <i>Ly6a</i>         | 4.06  | 2.99   | 3.39  | 3.33  |
| ENSMUSG00000075700 | <i>2810407C02Ri</i> | 6.23  | 4.98   | 5.64  | 5.22  |
| ENSMUSG00000075701 | <i>H47</i>          | 5.77  | 5.9    | 5.36  | 5.42  |
| ENSMUSG00000075702 | <i>Selm</i>         | 0.45  | 0.5    | 1.04  | 0.34  |
| ENSMUSG00000075703 | <i>D5Wsu178e</i>    | 4.29  | 3.82   | 3.76  | 3.11  |
| ENSMUSG00000075704 | <i>Txnrd2</i>       | 4.41  | 4.99   | 4.44  | 4.33  |
| ENSMUSG00000075705 | <i>Sepr1</i>        | 7.41  | 7.99   | 7.98  | 7.94  |
| ENSMUSG00000075706 | <i>GPx4</i>         | 3.85  | 3.26   | 3.97  | 3.58  |
| ENSMUSG00000075876 | NA                  | 1.02  | 0.95   | 2.49  | 0.64  |
| ENSMUSG00000075924 | NA                  | 2.07  | 2.12   | 2.71  | 2.35  |
| ENSMUSG00000076004 | NA                  | 7.23  | 8.71   | 7.8   | 7.2   |
| ENSMUSG00000076036 | NA                  | 10.61 | 10.55  | 10.97 | 11.09 |
| ENSMUSG00000076060 | NA                  | 4.45  | 4.52   | 3.85  | 3.89  |
| ENSMUSG00000076128 | NA                  | 4.96  | 4.79   | 4.98  | 5.07  |
| ENSMUSG00000076130 | NA                  | 1.47  | 2.98   | 1.34  | -0.68 |
| ENSMUSG00000076138 | NA                  | 9.02  | 7.91   | 9.01  | 8.63  |
| ENSMUSG00000076258 | NA                  | 9.46  | 10.02  | 9.76  | 8.91  |
| ENSMUSG00000076270 | NA                  | 3.44  | 3.05   | 3.46  | 2.67  |
| ENSMUSG00000076275 | NA                  | -0.75 | #NAME? | 1.3   | -0.53 |
| ENSMUSG00000076281 | NA                  | 4     | 4.76   | 3.68  | 2.96  |
| ENSMUSG00000076372 | NA                  | 4.55  | 3.33   | 4.14  | 3.12  |



|                    |              |        |        |      |        |
|--------------------|--------------|--------|--------|------|--------|
| ENSMUSG00000076387 | NA           | 1.89   | 2.34   | 2.78 | 2.93   |
| ENSMUSG00000076432 | Ywhag        | 2.89   | 2.68   | 2.9  | 2.37   |
| ENSMUSG00000076435 | BC018371     | 5.02   | 4.16   | 5.14 | 4.48   |
| ENSMUSG00000076437 | 2700094K13Ri | 1.38   | 2.27   | 1.82 | 2.05   |
| ENSMUSG00000076441 | Ass1         | 7.83   | 7.06   | 8.38 | 8.26   |
| ENSMUSG00000076454 | NA           | 1.23   | 2.74   | 0.92 | 1      |
| ENSMUSG00000076502 | NA           | -2.86  | -0.53  | 1.23 | -2.86  |
| ENSMUSG00000076509 | NA           | 0.92   | -0.01  | 2.2  | 0.16   |
| ENSMUSG00000076515 | NA           | -0.82  | -0.04  | 1.86 | #NAME? |
| ENSMUSG00000076516 | NA           | 0.28   | 0.94   | 2.48 | 1.05   |
| ENSMUSG00000076520 | NA           | -0.66  | -1.84  | 1.86 | -2.51  |
| ENSMUSG00000076521 | NA           | -2.86  | #NAME? | 1    | #NAME? |
| ENSMUSG00000076522 | NA           | 0.76   | -1.4   | 1.78 | #NAME? |
| ENSMUSG00000076523 | NA           | -0.87  | #NAME? | 1.31 | #NAME? |
| ENSMUSG00000076527 | NA           | -2.79  | -2.79  | 1.01 | #NAME? |
| ENSMUSG00000076536 | NA           | -2.78  | #NAME? | 1.33 | #NAME? |
| ENSMUSG00000076560 | NA           | -2.84  | -2.84  | 1.57 | -1.99  |
| ENSMUSG00000076563 | NA           | #NAME? | -2.79  | 1.52 | #NAME? |
| ENSMUSG00000076564 | NA           | -1.96  | #NAME? | 1.32 | #NAME? |
| ENSMUSG00000076566 | NA           | -1.79  | -0.96  | 1.4  | -2.05  |
| ENSMUSG00000076579 | NA           | -2.87  | #NAME? | 1.08 | #NAME? |
| ENSMUSG00000076580 | NA           | -1.37  | #NAME? | 2.18 | -2.02  |
| ENSMUSG00000076583 | NA           | -1.87  | -1.28  | 1.03 | -2.87  |
| ENSMUSG00000076585 | NA           | -2.79  | -1.35  | 1.06 | -0.94  |
| ENSMUSG00000076590 | NA           | #NAME? | #NAME? | 1.3  | #NAME? |
| ENSMUSG00000076592 | NA           | -0.47  | -0.79  | 1.29 | -0.51  |
| ENSMUSG00000076600 | NA           | -0.16  | -1.36  | 1.13 | #NAME? |
| ENSMUSG00000076604 | NA           | 1.32   | 2.65   | 4.31 | -1     |
| ENSMUSG00000076605 | NA           | 2.51   | 0.53   | 4.42 | 1.41   |
| ENSMUSG00000076607 | NA           | 1.26   | 1.35   | 3.22 | -0.79  |
| ENSMUSG00000076608 | NA           | -0.75  | 1.19   | 3.39 | -1     |

|                    |               |        |        |       |        |
|--------------------|---------------|--------|--------|-------|--------|
| ENSMUSG00000076609 | NA            | 5.49   | 5.57   | 7.76  | 4.93   |
| ENSMUSG00000076610 | NA            | 1.62   | 3.52   | 3.39  | 2.74   |
| ENSMUSG00000076612 | NA            | -3.33  | -0.76  | 1.02  | -0.17  |
| ENSMUSG00000076613 | NA            | -1.47  | 0.62   | 1.47  | 0.25   |
| ENSMUSG00000076616 | NA            | -0.95  | -3.95  | 2.49  | -1.38  |
| ENSMUSG00000076617 | NA            | 3.23   | 2.75   | 6.23  | 2.22   |
| ENSMUSG00000076618 | NA            | #NAME? | 1.81   | 2.6   | -0.71  |
| ENSMUSG00000076619 | NA            | 0.2    | 0.32   | 2.45  | 0.25   |
| ENSMUSG00000076672 | NA            | -4.45  | -2.81  | 1.34  | -2.81  |
| ENSMUSG00000076687 | NA            | #NAME? | #NAME? | 1.14  | #NAME? |
| ENSMUSG00000076928 | NA            | 0.81   | 0.24   | 1.79  | -0.41  |
| ENSMUSG00000076929 | NA            | -0.84  | -1.09  | 2.44  | -0.22  |
| ENSMUSG00000076930 | NA            | -0.6   | #NAME? | 2.6   | #NAME? |
| ENSMUSG00000076931 | NA            | -0.39  | -0.84  | 3.1   | 0.11   |
| ENSMUSG00000076933 | NA            | -0.79  | 0.66   | 3.46  | 0.18   |
| ENSMUSG00000076934 | NA            | #NAME? | -0.99  | 2.13  | -0.13  |
| ENSMUSG00000076937 | NA            | -0.66  | 1.04   | 2.72  | #NAME? |
| ENSMUSG00000076938 | NA            | #NAME? | 0.16   | 3.08  | #NAME? |
| ENSMUSG00000077220 | NA            | 2.98   | #NAME? | -0.83 | -0.76  |
| ENSMUSG00000077222 | NA            | -1.07  | -0.22  | 1.2   | 0.07   |
| ENSMUSG00000077346 | NA            | 3.6    | 2.67   | 3.12  | 3.18   |
| ENSMUSG00000077370 | NA            | 2.68   | 2.46   | 5.18  | 3.52   |
| ENSMUSG00000077394 | NA            | 1.46   | #NAME? | -0.86 | -0.86  |
| ENSMUSG00000077450 | <i>Rab11b</i> | 4.96   | 4.15   | 4.62  | 4.29   |
| ENSMUSG00000077493 | NA            | 2.21   | -0.9   | 2.81  | 0.45   |
| ENSMUSG00000077625 | NA            | 3.17   | 2.1    | 3.1   | 2.94   |
| ENSMUSG00000077637 | NA            | 2.16   | 1.98   | 1.79  | 0.91   |
| ENSMUSG00000077705 | NA            | 3.56   | 2.68   | 2.61  | 2.95   |
| ENSMUSG00000077709 | NA            | 2.05   | 1.04   | 1.55  | 1.16   |
| ENSMUSG00000077924 | NA            | 3.54   | 4.3    | 2.91  | 3.23   |
| ENSMUSG00000078081 | NA            | 2.11   | 2.24   | 2.18  | 2.49   |

|                    |                    |       |       |       |      |
|--------------------|--------------------|-------|-------|-------|------|
| ENSMUSG00000078092 | <i>NA</i>          | 5.23  | 4.67  | 5.06  | 4.66 |
| ENSMUSG00000078103 | <i>NA</i>          | 2.87  | 0.45  | 2.83  | 2.92 |
| ENSMUSG00000078104 | <i>EG329070</i>    | 2.4   | 2.03  | 2.66  | 2.41 |
| ENSMUSG00000078105 | <i>NA</i>          | 6.29  | 7.29  | 6.72  | 6.59 |
| ENSMUSG00000078108 | <i>NA</i>          | 2.21  | 1.61  | 1.86  | 2.17 |
| ENSMUSG00000078124 | <i>NA</i>          | 3.23  | 4.07  | 3.3   | 3.19 |
| ENSMUSG00000078135 | <i>Eid1</i>        | 3.98  | 3.56  | 3.54  | 3.15 |
| ENSMUSG00000078143 | <i>NA</i>          | 5.09  | 4.24  | 4.58  | 3.97 |
| ENSMUSG00000078152 | <i>NA</i>          | 4.21  | 3.05  | 3.5   | 3.31 |
| ENSMUSG00000078153 | <i>NA</i>          | 3.08  | 3.48  | 3.01  | 3.49 |
| ENSMUSG00000078173 | <i>AK053703</i>    | 1.25  | 1.62  | 1.53  | 1.33 |
| ENSMUSG00000078174 | <i>NA</i>          | 1.98  | 2.34  | 3.29  | 2.82 |
| ENSMUSG00000078178 | <i>NA</i>          | 3.24  | 3.47  | 2.93  | 3.14 |
| ENSMUSG00000078183 | <i>NA</i>          | 1.03  | -0.47 | 0.44  | 0.6  |
| ENSMUSG00000078188 | <i>NA</i>          | 4.38  | 4.5   | 4.76  | 4.55 |
| ENSMUSG00000078193 | <i>NA</i>          | 2.12  | 2.66  | 2.5   | 1.83 |
| ENSMUSG00000078201 | <i>C730025P13R</i> | 2.65  | 3.51  | 2.91  | 3.03 |
| ENSMUSG00000078226 | <i>NA</i>          | 2.61  | 2.05  | 2.45  | 2.52 |
| ENSMUSG00000078234 | <i>Klhdc7a</i>     | 0.83  | 1.46  | 1.87  | 1.71 |
| ENSMUSG00000078250 | <i>NA</i>          | 5.82  | 5.47  | 5.71  | 5.45 |
| ENSMUSG00000078282 | <i>NA</i>          | 1.08  | -2.11 | -0.03 | -1   |
| ENSMUSG00000078284 | <i>NA</i>          | 2.16  | -0.03 | 1.29  | 1.01 |
| ENSMUSG00000078285 | <i>Plekha6</i>     | 3.59  | 3.78  | 3.67  | 3.68 |
| ENSMUSG00000078303 | <i>NA</i>          | 10.28 | 10.18 | 10.09 | 9.06 |
| ENSMUSG00000078317 | <i>F8a</i>         | 2.15  | 2.28  | 2.09  | 1.9  |
| ENSMUSG00000078348 | <i>Sf3b5</i>       | 3.64  | 4.54  | 4.49  | 4.52 |
| ENSMUSG00000078364 | <i>NA</i>          | 3.13  | 1.86  | 3.27  | 2.92 |
| ENSMUSG00000078373 | <i>NA</i>          | 1.54  | 1.42  | 1.61  | 1.08 |
| ENSMUSG00000078429 | <i>Ctdsp2</i>      | 3.73  | 3.98  | 4.03  | 3.82 |
| ENSMUSG00000078440 | <i>Dohh</i>        | 2.73  | 3.59  | 3.3   | 3.22 |
| ENSMUSG00000078441 | <i>Scamp4</i>      | 4.53  | 5.15  | 4.73  | 4.76 |

|                    |                     |      |       |      |      |
|--------------------|---------------------|------|-------|------|------|
| ENSMUSG00000078445 | <i>NA</i>           | 1.01 | 1.49  | 1.27 | 1.31 |
| ENSMUSG00000078449 | <i>NA</i>           | 4.62 | 3.61  | 3.82 | 3.97 |
| ENSMUSG00000078452 | <i>Raet1a</i>       | 4.11 | 1.82  | 3.63 | 1.58 |
| ENSMUSG00000078453 | <i>3110003A17Ri</i> | 3.22 | 2.07  | 2.98 | 2.77 |
| ENSMUSG00000078480 | <i>NA</i>           | 2.15 | 1.34  | 2.3  | 2.14 |
| ENSMUSG00000078482 | <i>NA</i>           | 1.23 | -0.36 | 0.61 | 1.99 |
| ENSMUSG00000078484 | <i>Klhl17</i>       | 1.28 | 2.13  | 1.9  | 1.38 |
| ENSMUSG00000078515 | <i>NA</i>           | 6.66 | 7.04  | 6.55 | 6.41 |
| ENSMUSG00000078517 | <i>C230096C10R</i>  | 2.51 | 3.29  | 3.41 | 3.37 |
| ENSMUSG00000078525 | <i>NA</i>           | 0.85 | 0.98  | 1.96 | 2.45 |
| ENSMUSG00000078548 | <i>NA</i>           | 5.1  | 4.49  | 4.81 | 4.4  |
| ENSMUSG00000078560 | <i>NA</i>           | 2.85 | 3.38  | 2.91 | 3.36 |
| ENSMUSG00000078563 | <i>NA</i>           | 3.49 | 1.85  | 1.76 | 3.15 |
| ENSMUSG00000078566 | <i>Bnip3</i>        | 6    | 5.35  | 5.87 | 5.82 |
| ENSMUSG00000078567 | <i>NA</i>           | 1.97 | 2.59  | 2.34 | 2.39 |
| ENSMUSG00000078570 | <i>NA</i>           | 3.36 | 3.96  | 3.26 | 3.44 |
| ENSMUSG00000078571 | <i>NA</i>           | 2.29 | 2.6   | 2.57 | 2.32 |
| ENSMUSG00000078572 | <i>NA</i>           | 3.8  | 4.16  | 4.47 | 3.84 |
| ENSMUSG00000078578 | <i>Ube2d3</i>       | 5.86 | 4.72  | 5.54 | 5.05 |
| ENSMUSG00000078580 | <i>E430018J23Ri</i> | 1.41 | 1.42  | 1.1  | 1.08 |
| ENSMUSG00000078584 | <i>AU022252</i>     | 5.4  | 5.18  | 5.34 | 5.14 |
| ENSMUSG00000078588 | <i>B4galt2</i>      | 1.7  | 2.04  | 1.84 | 2    |
| ENSMUSG00000078607 | <i>NA</i>           | 1.06 | 1.21  | 2.1  | 0.76 |
| ENSMUSG00000078612 | <i>NA</i>           | 1.07 | 0.64  | 1.24 | 0.48 |
| ENSMUSG00000078619 | <i>Smarcd2</i>      | 5.34 | 5.58  | 5.51 | 5.09 |
| ENSMUSG00000078622 | <i>Ccdc47</i>       | 5.4  | 4.41  | 4.75 | 4.42 |
| ENSMUSG00000078645 | <i>4930504E06Ri</i> | 2.79 | 3.98  | 3.53 | 3.53 |
| ENSMUSG00000078650 | <i>G6pc</i>         | 8.57 | 7.73  | 7.95 | 8.14 |
| ENSMUSG00000078652 | <i>Psme3</i>        | 5.26 | 5.58  | 5.52 | 5.28 |
| ENSMUSG00000078653 | <i>Cntd1</i>        | 2.78 | 2.03  | 2.42 | 1.68 |
| ENSMUSG00000078656 | <i>Vps25</i>        | 5.99 | 6.25  | 6.14 | 5.96 |

|                    |                      |      |       |      |       |
|--------------------|----------------------|------|-------|------|-------|
| ENSMUSG00000078667 | NA                   | 1.69 | 1.82  | 1.74 | 1.77  |
| ENSMUSG00000078670 | NA                   | 1.88 | 2.03  | 1.15 | 1.53  |
| ENSMUSG00000078671 | <i>Chd2</i>          | 1.33 | 0.39  | 1.09 | -0.03 |
| ENSMUSG00000078672 | <i>OTTMUSG000</i>    | 1.45 | 1.45  | 2.43 | 2.15  |
| ENSMUSG00000078674 | <i>Mup2</i>          | 1.4  | -0.82 | 0.35 | 0.97  |
| ENSMUSG00000078675 | <i>Mup2</i>          | 2.22 | -0.31 | 1.34 | 1.98  |
| ENSMUSG00000078676 | <i>Casc3</i>         | 3.27 | 3.51  | 3.18 | 3.17  |
| ENSMUSG00000078680 | <i>Mup2</i>          | 7.41 | 5.96  | 6.62 | 7.43  |
| ENSMUSG00000078681 | <i>Tm2d3</i>         | 3.98 | 4.33  | 3.79 | 3.8   |
| ENSMUSG00000078685 | NA                   | 2.39 | -1.64 | 1.23 | 1.08  |
| ENSMUSG00000078686 | <i>Mup2</i>          | 5.81 | 2.71  | 5.12 | 6.05  |
| ENSMUSG00000078695 | <i>Mell3</i>         | 4.5  | 4.53  | 4.66 | 4.36  |
| ENSMUSG00000078697 | NA                   | 3.66 | 5.11  | 4.32 | 4.12  |
| ENSMUSG00000078699 | NA                   | 3.28 | 4.43  | 4.02 | 4.09  |
| ENSMUSG00000078713 | <i>I110019J04Rik</i> | 2.47 | 2.38  | 2.47 | 2.29  |
| ENSMUSG00000078719 | <i>LOC10003967</i>   | 3.45 | 3.8   | 3.93 | 3.72  |
| ENSMUSG00000078761 | <i>Ankrd50</i>       | 1.78 | 1.8   | 1.51 | 1.38  |
| ENSMUSG00000078765 | <i>U2af26</i>        | 3.39 | 3.82  | 3.7  | 3.65  |
| ENSMUSG00000078772 | NA                   | 3.29 | 2.63  | 3    | 2.75  |
| ENSMUSG00000078784 | <i>I810022K09Ri</i>  | 3.56 | 1.27  | 2.48 | 2.13  |
| ENSMUSG00000078786 | NA                   | 2.07 | 2.51  | 2.61 | 2.6   |
| ENSMUSG00000078789 | NA                   | 3.69 | 4.04  | 3.92 | 3.74  |
| ENSMUSG00000078798 | <i>C730007P19R</i>   | 7.43 | 0.57  | 7.78 | 1.66  |
| ENSMUSG00000078799 | NA                   | 4.73 | -0.38 | 5.49 | 1.22  |
| ENSMUSG00000078812 | <i>Eif5a</i>         | 7.02 | 7.19  | 7.17 | 6.93  |
| ENSMUSG00000078813 | <i>Leng1</i>         | 3.17 | 3.36  | 2.96 | 3.2   |
| ENSMUSG00000078851 | <i>Hist3h2a</i>      | 0.72 | 1.7   | 1.96 | 0.99  |
| ENSMUSG00000078852 | <i>Zfp672</i>        | 1.66 | 1.33  | 1.76 | 1.8   |
| ENSMUSG00000078853 | <i>Igtp</i>          | 5.83 | 4.53  | 4.34 | 4.82  |
| ENSMUSG00000078861 | NA                   | 1.51 | -0.24 | 0.62 | 0.17  |
| ENSMUSG00000078866 | NA                   | 1.42 | 0.33  | 1.86 | 1.26  |

|                    |                     |      |       |       |      |
|--------------------|---------------------|------|-------|-------|------|
| ENSMUSG00000078900 | <i>NA</i>           | 3.78 | 3.63  | 3.55  | 3.73 |
| ENSMUSG00000078908 | <i>Mon1b</i>        | 2.47 | 2.62  | 2.34  | 2.26 |
| ENSMUSG00000078914 | <i>NA</i>           | 2.53 | 1.57  | 2.2   | 3.61 |
| ENSMUSG00000078916 | <i>NA</i>           | 4.7  | 3.85  | 3.86  | 4.78 |
| ENSMUSG00000078919 | <i>Dpm1</i>         | 5.33 | 4.72  | 5.3   | 4.74 |
| ENSMUSG00000078920 | <i>Ifi47</i>        | 3.35 | 3.03  | 2.48  | 2.35 |
| ENSMUSG00000078923 | <i>Ube2v1</i>       | 0.8  | 1.71  | 1.08  | 0.61 |
| ENSMUSG00000078931 | <i>AK209600</i>     | 4.91 | 5.01  | 4.67  | 4.35 |
| ENSMUSG00000078936 | <i>2410002O22Ra</i> | 2.12 | 1.82  | 2.46  | 2.48 |
| ENSMUSG00000078939 | <i>NA</i>           | 4.23 | 3.77  | 4.18  | 4.41 |
| ENSMUSG00000078941 | <i>Taf9</i>         | 4.19 | 3.21  | 4.06  | 3.49 |
| ENSMUSG00000078946 | <i>NA</i>           | 1.99 | 0.21  | 1.11  | 0.45 |
| ENSMUSG00000078960 | <i>AK044623</i>     | 2.26 | 2.73  | 2.26  | 2.6  |
| ENSMUSG00000078961 | <i>NA</i>           | 1.15 | 1.19  | 1.49  | 1.84 |
| ENSMUSG00000078964 | <i>LOC382044</i>    | 7.22 | 6.95  | 6.8   | 6.74 |
| ENSMUSG00000078970 | <i>Wdr92</i>        | 2    | 2.14  | 2.34  | 2.01 |
| ENSMUSG00000078983 | <i>NA</i>           | 3.26 | 2.76  | 3.22  | 3.08 |
| ENSMUSG00000079002 | <i>C030006K11Ra</i> | 4.06 | 4.96  | 4.6   | 4.75 |
| ENSMUSG00000079003 | <i>Samd1</i>        | 2.84 | 3.25  | 3.34  | 2.89 |
| ENSMUSG00000079004 | <i>NA</i>           | 1.1  | 2.09  | 2.49  | 2.77 |
| ENSMUSG00000079012 | <i>Serpina3m</i>    | 9.17 | 9.15  | 9.28  | 9.56 |
| ENSMUSG00000079015 | <i>Serpina1c</i>    | 9.46 | 9.6   | 9.75  | 9.99 |
| ENSMUSG00000079017 | <i>Isg12</i>        | 3.11 | 2.49  | 2.76  | 3.36 |
| ENSMUSG00000079036 | <i>Alkbh1</i>       | 1.53 | 1.32  | 1.43  | 1.34 |
| ENSMUSG00000079037 | <i>Prnp</i>         | 4.3  | 3.92  | 4.14  | 3.39 |
| ENSMUSG00000079040 | <i>NA</i>           | 2.51 | 2.74  | 2.88  | 2.82 |
| ENSMUSG00000079043 | <i>Fastkd5</i>      | 3    | 2.47  | 2.65  | 2.78 |
| ENSMUSG00000079057 | <i>Cyp4v3</i>       | 7.7  | 7.17  | 7.48  | 7.17 |
| ENSMUSG00000079065 | <i>NA</i>           | 1.72 | -0.22 | -0.03 | 0    |
| ENSMUSG00000079068 | <i>NA</i>           | 1.17 | 1.45  | 1.7   | 3.54 |
| ENSMUSG00000079104 | <i>AU021838</i>     | 4.52 | 4.24  | 4.3   | 3.99 |

|                    |                     |       |       |       |       |
|--------------------|---------------------|-------|-------|-------|-------|
| ENSMUSG00000079111 | <i>Kdelr2</i>       | 5.97  | 5.84  | 5.89  | 5.75  |
| ENSMUSG00000079139 | NA                  | 1.78  | 1.68  | 1.08  | 1.47  |
| ENSMUSG00000079144 | <i>A130010J15Ri</i> | 2.15  | 2.02  | 2.03  | 1.87  |
| ENSMUSG00000079145 | NA                  | 5.7   | 4.92  | 5.58  | 4.83  |
| ENSMUSG00000079149 | <i>Atp11a</i>       | 1.08  | 0.73  | 0.86  | 0.03  |
| ENSMUSG00000079164 | <i>Tlr5</i>         | 1.59  | 1.37  | 1.49  | 1.72  |
| ENSMUSG00000079165 | <i>Lrch4</i>        | 1.99  | 2.79  | 2.71  | 2.25  |
| ENSMUSG00000079179 | NA                  | 1.65  | 1.92  | 2.21  | 2.02  |
| ENSMUSG00000079184 | <i>Mphosph8</i>     | 3.88  | 2.92  | 3.22  | 2.7   |
| ENSMUSG00000079185 | NA                  | 1.53  | 1.04  | 1.97  | 1.57  |
| ENSMUSG00000079188 | NA                  | -0.09 | 0.26  | 1.8   | 2.22  |
| ENSMUSG00000079197 | <i>Psme2</i>        | 3.03  | 2.98  | 3.26  | 3.24  |
| ENSMUSG00000079215 | <i>Zfp664</i>       | 3.39  | 3.43  | 3.05  | 2.96  |
| ENSMUSG00000079227 | <i>Ccr5</i>         | 1.69  | 0.7   | 0.68  | -0.07 |
| ENSMUSG00000079252 | <i>Ifrg15</i>       | 5.44  | 4.77  | 5.29  | 4.88  |
| ENSMUSG00000079283 | <i>2310009B15Ri</i> | 1.41  | 1.29  | 1.69  | 2.1   |
| ENSMUSG00000079297 | NA                  | 3.11  | 2.01  | 2.35  | 3.34  |
| ENSMUSG00000079316 | <i>Rab9</i>         | 6.05  | 4.91  | 5.54  | 5.37  |
| ENSMUSG00000079317 | <i>Trappc2</i>      | 1.09  | -0.83 | 0.44  | -0.69 |
| ENSMUSG00000079334 | <i>Hyal1</i>        | 4.56  | 5.26  | 5.11  | 4.81  |
| ENSMUSG00000079343 | <i>EG317677</i>     | 2.18  | -5.73 | 1.82  | -4.15 |
| ENSMUSG00000079351 | NA                  | 2.59  | 1.44  | 1.98  | 1.32  |
| ENSMUSG00000079355 | <i>Ccr11</i>        | 5.22  | 5.27  | 5.1   | 4.82  |
| ENSMUSG00000079357 | NA                  | 2.69  | 1.57  | 2.3   | 1.51  |
| ENSMUSG00000079362 | <i>Mpa2l</i>        | 1.82  | 0.09  | -0.61 | -1.19 |
| ENSMUSG00000079363 | <i>Gbp4</i>         | 1.34  | -0.74 | -1.69 | -1.21 |
| ENSMUSG00000079366 | NA                  | 2.45  | 2.29  | 2.38  | 1.91  |
| ENSMUSG00000079411 | <i>Alg13</i>        | 1.4   | 0.3   | 1.21  | 0.8   |
| ENSMUSG00000079415 | <i>Zfp91-cntf</i>   | 4.01  | 3.96  | 4.02  | 3.8   |
| ENSMUSG00000079419 | <i>Ms4a6c</i>       | 2.16  | 0.14  | 1.04  | 1.14  |
| ENSMUSG00000079426 | <i>Arpc4</i>        | 5.37  | 5.82  | 5.88  | 5.83  |

|                    |                     |      |       |      |      |
|--------------------|---------------------|------|-------|------|------|
| ENSMUSG00000079427 | <i>NA</i>           | 3.4  | 2.49  | 3.15 | 2.92 |
| ENSMUSG00000079437 | <i>I810059G22Ri</i> | 4.25 | 4.63  | 4.49 | 4.21 |
| ENSMUSG00000079447 | <i>AI661453</i>     | 1.95 | 2.89  | 2.51 | 2.35 |
| ENSMUSG00000079468 | <i>NA</i>           | 2.14 | 0.7   | 1.66 | 1.36 |
| ENSMUSG00000079469 | <i>Pigb</i>         | 2.37 | 2.86  | 2.55 | 2.42 |
| ENSMUSG00000079477 | <i>Rab7</i>         | 6.16 | 5.85  | 6.02 | 5.76 |
| ENSMUSG00000079478 | <i>Ssscal</i>       | 3.69 | 4.05  | 3.97 | 3.54 |
| ENSMUSG00000079484 | <i>Phyhd1</i>       | 5.44 | 5.34  | 5.39 | 5.19 |
| ENSMUSG00000079487 | <i>Med12</i>        | 2    | 2.1   | 2.51 | 2.3  |
| ENSMUSG00000079488 | <i>AK018679</i>     | 4.94 | 4.5   | 5.25 | 5    |
| ENSMUSG00000079491 | <i>H2-T10</i>       | 2.13 | 1.76  | 1.4  | 1.72 |
| ENSMUSG00000079498 | <i>Wdr9</i>         | 1.07 | 0.91  | 0.98 | 0.75 |
| ENSMUSG00000079505 | <i>NA</i>           | 2.91 | 3.24  | 3.09 | 2.96 |
| ENSMUSG00000079507 | <i>H2-Q1</i>        | 1.26 | 0.23  | 1.02 | 0.14 |
| ENSMUSG00000079509 | <i>Zfx</i>          | 2.2  | 1.04  | 1.8  | 1.42 |
| ENSMUSG00000079511 | <i>Ccdc142</i>      | 2.82 | 2.92  | 2.9  | 2.63 |
| ENSMUSG00000079529 | <i>Mtcp1</i>        | 1.35 | 0.29  | 1.2  | 0.71 |
| ENSMUSG00000079547 | <i>H2-DMb1</i>      | 1.54 | 1.22  | 0.63 | 1.64 |
| ENSMUSG00000079551 | <i>Cflar</i>        | 2.58 | 2.42  | 3.29 | 3.07 |
| ENSMUSG00000079552 | <i>St3gal6</i>      | 0.6  | -1.44 | 1.07 | 0.66 |
| ENSMUSG00000079555 | <i>BC023882</i>     | 1.83 | 0.47  | 1.36 | 0.24 |
| ENSMUSG00000079557 | <i>2-Mar</i>        | 5.01 | 5.53  | 5    | 4.91 |
| ENSMUSG00000079562 | <i>Maea</i>         | 4.47 | 4.77  | 4.51 | 4.22 |
| ENSMUSG00000079563 | <i>Pglyrp2</i>      | 6.05 | 6.25  | 6.22 | 5.89 |
| ENSMUSG00000079605 | <i>Zbtb9</i>        | 2.36 | 2.41  | 2.13 | 1.93 |
| ENSMUSG00000079611 | <i>NA</i>           | 3.36 | 3.65  | 3.34 | 2.64 |
| ENSMUSG00000079614 | <i>Seh1l</i>        | 4.48 | 3.6   | 3.93 | 3.69 |
| ENSMUSG00000079641 | <i>Rpl39</i>        | 1.64 | 0.86  | 1.4  | 0.88 |
| ENSMUSG00000079658 | <i>Tceb1</i>        | 5.12 | 3.77  | 4.46 | 4.06 |
| ENSMUSG00000079659 | <i>4930420K17Ri</i> | 5.9  | 5.37  | 5.95 | 5.2  |
| ENSMUSG00000079671 | <i>NA</i>           | 1.95 | 1.29  | 1.36 | 0.57 |



|                    |                      |      |       |      |       |
|--------------------|----------------------|------|-------|------|-------|
| ENSMUSG00000079677 | NA                   | 3.95 | 4.85  | 4.48 | 4.33  |
| ENSMUSG00000079681 | <i>Gpl1</i>          | 2.37 | 3.28  | 2.91 | 2.74  |
| ENSMUSG00000079716 | NA                   | 2.73 | 2.31  | 2.42 | 1.63  |
| ENSMUSG00000079737 | <i>3110001122Rik</i> | 1.17 | 0.93  | 1.58 | 1.37  |
| ENSMUSG00000079738 | NA                   | 1.1  | 0.39  | 0.86 | 0.31  |
| ENSMUSG00000079869 | NA                   | 4.05 | 3.47  | 3.16 | 3.29  |
| ENSMUSG00000079880 | NA                   | 1.85 | -0.03 | 0.68 | -1.33 |
| ENSMUSG00000079914 | NA                   | 3.7  | 3.66  | 3.65 | 3.44  |
| ENSMUSG00000079936 | NA                   | 5.89 | 6.61  | 6.62 | 6.47  |
| ENSMUSG00000079954 | NA                   | 2.07 | 1.44  | 1.47 | 1.67  |
| ENSMUSG00000079961 | NA                   | 3.5  | 3.01  | 3.25 | 2.21  |
| ENSMUSG00000079971 | NA                   | 3.73 | 3.9   | 3.87 | 3.59  |
| ENSMUSG00000079985 | NA                   | 1.07 | 1.55  | 1.24 | -0.38 |
| ENSMUSG00000079986 | NA                   | 5.4  | 5.96  | 4.65 | 4.92  |
| ENSMUSG00000079989 | NA                   | 4.3  | 2.98  | 3.59 | 3.21  |
| ENSMUSG00000079990 | NA                   | 3.55 | 3.86  | 3.38 | 3.43  |
| ENSMUSG00000080018 | NA                   | 1.38 | 1.26  | 1.16 | 0.98  |
| ENSMUSG00000080025 | NA                   | 5.54 | 5.71  | 5.61 | 5.01  |
| ENSMUSG00000080049 | <i>Exosc6</i>        | 2.32 | 2.84  | 2.28 | 2.28  |
| ENSMUSG00000080058 | NA                   | 4.73 | 6.54  | 5.99 | 5.86  |
| ENSMUSG00000080124 | NA                   | 1.61 | 1.1   | 0.02 | -0.19 |
| ENSMUSG00000080125 | <i>AK171116</i>      | 2.74 | 2.35  | 2.99 | 2.44  |
| ENSMUSG00000080136 | NA                   | 3.76 | 4.41  | 3.82 | 3.84  |
| ENSMUSG00000080153 | NA                   | 2.9  | 1.04  | 1.27 | 2.13  |
| ENSMUSG00000080225 | NA                   | 1.44 | 2.18  | 2.04 | 1.23  |
| ENSMUSG00000080229 | NA                   | 1.57 | 0.96  | 1.29 | 0.76  |
| ENSMUSG00000080238 | <i>Ubp1</i>          | 4.35 | 4.07  | 4.39 | 4.17  |
| ENSMUSG00000080242 | NA                   | 3.29 | 3.76  | 3.8  | 4.03  |
| ENSMUSG00000080268 | <i>Brms1</i>         | 3.46 | 4.14  | 3.95 | 3.82  |
| ENSMUSG00000080374 | NA                   | 4.14 | 4.57  | 5.13 | 4.08  |
| ENSMUSG00000080395 | NA                   | 7.86 | 5.83  | 7.11 | 8.57  |

|                    |    |      |       |       |       |
|--------------------|----|------|-------|-------|-------|
| ENSMUSG00000080404 | NA | 5.67 | 6.09  | 4.86  | 5.27  |
| ENSMUSG00000080457 | NA | 4.3  | 4.42  | 2.82  | 4.51  |
| ENSMUSG00000080512 | NA | 8.14 | 7.29  | 7.44  | 7.87  |
| ENSMUSG00000080533 | NA | 1.8  | 2.95  | 1.68  | 2.63  |
| ENSMUSG00000080552 | NA | 1.03 | 1.36  | 2.02  | 1.14  |
| ENSMUSG00000080587 | NA | 1.58 | -1.21 | -0.82 | -0.97 |
| ENSMUSG00000080643 | NA | 4.24 | 5.63  | 6.6   | 4.9   |
| ENSMUSG00000080738 | NA | 6.56 | 5.18  | 5.31  | 7.07  |
| ENSMUSG00000080772 | NA | 1.84 | 0.74  | 1.51  | 2.28  |
| ENSMUSG00000080824 | NA | 2.07 | 0.53  | 2.01  | 1.58  |
| ENSMUSG00000080848 | NA | 3.22 | 2.7   | 3.43  | 4.68  |
| ENSMUSG00000080893 | NA | 5.26 | 5     | 5.33  | 5.26  |
| ENSMUSG00000080904 | NA | 8.22 | 6.63  | 7.32  | 7.75  |
| ENSMUSG00000080907 | NA | 0.19 | 0.79  | 1.17  | 1     |
| ENSMUSG00000080921 | NA | 3.92 | 3.4   | 4.32  | 4.66  |
| ENSMUSG00000080935 | NA | 4.98 | 4.22  | 4.52  | 5.39  |
| ENSMUSG00000080973 | NA | 1.17 | -0.26 | 0.3   | 1.82  |
| ENSMUSG00000080989 | NA | 2.18 | 1.84  | 1.59  | 1.71  |
| ENSMUSG00000080991 | NA | 3.51 | 1.54  | 2.39  | 3.05  |
| ENSMUSG00000081049 | NA | 2.92 | 0.45  | 2.05  | 2.72  |
| ENSMUSG00000081051 | NA | 4.53 | 4.71  | 5.38  | 6.02  |
| ENSMUSG00000081059 | NA | 2.75 | 1.56  | 1.66  | 3.09  |
| ENSMUSG00000081094 | NA | 0.55 | 0.16  | 1.01  | 1.2   |
| ENSMUSG00000081121 | NA | 2.07 | 0.71  | 1.26  | 2.32  |
| ENSMUSG00000081149 | NA | 2.33 | 1.78  | 1.67  | 2.24  |
| ENSMUSG00000081164 | NA | 1.04 | 0.49  | -2.15 | 0.23  |
| ENSMUSG00000081204 | NA | 2.78 | 1.21  | 1.91  | 2.64  |
| ENSMUSG00000081223 | NA | 2.23 | 2.93  | 2.69  | 3.24  |
| ENSMUSG00000081272 | NA | 3.09 | 3.2   | 2.75  | 3.39  |
| ENSMUSG00000081277 | NA | 3.5  | 1.89  | 2.46  | 2.99  |
| ENSMUSG00000081344 | NA | 4.65 | 3.04  | 4.37  | 5.19  |

|                    |              |      |      |      |      |
|--------------------|--------------|------|------|------|------|
| ENSMUSG00000081370 | NA           | 1.08 | 0    | 0.24 | 1.59 |
| ENSMUSG00000081393 | NA           | 3.99 | 3.34 | 3.78 | 3.76 |
| ENSMUSG00000081411 | NA           | 3.24 | 2.74 | 1.84 | 2.34 |
| ENSMUSG00000081413 | NA           | 2.25 | 1.56 | 2.54 | 1.67 |
| ENSMUSG00000081419 | NA           | 3.67 | 3.12 | 3.13 | 4.15 |
| ENSMUSG00000081476 | NA           | 2.02 | 1.99 | 1.85 | 2.46 |
| ENSMUSG00000081485 | NA           | 4.75 | 1.52 | 3.84 | 5.34 |
| ENSMUSG00000081512 | NA           | 2.3  | 2.85 | 2.07 | 2.2  |
| ENSMUSG00000081519 | NA           | 2.37 | 1.62 | 1.75 | 1.92 |
| ENSMUSG00000081534 | 4930570C03Ri | 5.17 | 5.55 | 5.27 | 5.05 |
| ENSMUSG00000081603 | NA           | 2.58 | 0.28 | 1.42 | 1.55 |
| ENSMUSG00000081669 | NA           | 2.19 | 1.51 | 1.99 | 3.07 |
| ENSMUSG00000081715 | NA           | 3.51 | 2.68 | 2.59 | 4.18 |
| ENSMUSG00000081726 | NA           | 0.7  | 1.04 | 1.41 | 2.62 |
| ENSMUSG00000081727 | NA           | 0.96 | 1.6  | 1.75 | 2    |
| ENSMUSG00000081729 | NA           | 3.76 | 3.13 | 2.76 | 3.68 |
| ENSMUSG00000081772 | NA           | 2.18 | 0.78 | 1.64 | 1.49 |
| ENSMUSG00000081780 | NA           | 1.74 | 0.04 | 1.08 | 1.35 |
| ENSMUSG00000081787 | NA           | 1.23 | 1.16 | 0.89 | 2.06 |
| ENSMUSG00000081824 | NA           | 5.37 | 4.26 | 5.25 | 5.69 |
| ENSMUSG00000081867 | NA           | 2.83 | 3.78 | 3.65 | 3.71 |
| ENSMUSG00000081888 | NA           | 2.65 | 2.34 | 1.59 | 3.27 |
| ENSMUSG00000081944 | NA           | 0.92 | 0.66 | 1.44 | 0.4  |
| ENSMUSG00000081952 | NA           | 1.36 | 1.6  | 1.86 | 2.28 |
| ENSMUSG00000081956 | NA           | 2.52 | 1.71 | 2.8  | 2.42 |
| ENSMUSG00000081988 | NA           | 2.5  | 1.36 | 2    | 1.5  |
| ENSMUSG00000082044 | NA           | 1.93 | 1.61 | 2.23 | 2.12 |
| ENSMUSG00000082100 | NA           | 3.88 | 4.29 | 4.41 | 5.41 |
| ENSMUSG00000082192 | NA           | 2.38 | 2.32 | 2.11 | 3.49 |
| ENSMUSG00000082209 | NA           | 3.61 | 3.75 | 3.59 | 4.53 |
| ENSMUSG00000082232 | NA           | 2.14 | 1.91 | 2.29 | 2.38 |

|                    |               |      |       |      |       |
|--------------------|---------------|------|-------|------|-------|
| ENSMUSG00000082272 | NA            | 2.49 | 2.03  | 2.19 | 3.8   |
| ENSMUSG00000082286 | NA            | 3.7  | 4.32  | 4.21 | 3.69  |
| ENSMUSG00000082292 | NA            | 2.14 | 1.13  | 0.54 | 0.97  |
| ENSMUSG00000082293 | Bhmt          | 6.66 | 6.07  | 6.69 | 5.09  |
| ENSMUSG00000082319 | NA            | 1.39 | 1.51  | 1.08 | 2.23  |
| ENSMUSG00000082321 | NA            | 2.09 | 0.23  | 0.56 | 1.73  |
| ENSMUSG00000082363 | NA            | 3.52 | 0.4   | 2.54 | 3.45  |
| ENSMUSG00000082385 | NA            | 3.28 | 2.13  | 2.84 | 3.74  |
| ENSMUSG00000082409 | NA            | 1.75 | 1.09  | 1.54 | 3.1   |
| ENSMUSG00000082425 | NA            | 3.78 | 1.7   | 3.72 | 2.92  |
| ENSMUSG00000082431 | NA            | 1.41 | 1.91  | 1.31 | 1.71  |
| ENSMUSG00000082454 | NA            | 2.49 | 1.61  | 2.15 | 2.97  |
| ENSMUSG00000082519 | NA            | 3.8  | 2.39  | 3.21 | 2.82  |
| ENSMUSG00000082530 | NA            | 0.95 | 1.05  | 1.64 | 3.45  |
| ENSMUSG00000082536 | NA            | 4.56 | 3.36  | 3.93 | 5.2   |
| ENSMUSG00000082654 | NA            | 2.3  | 1.73  | 1.96 | 2.37  |
| ENSMUSG00000082674 | NA            | 2.84 | 1.87  | 2.26 | 3.15  |
| ENSMUSG00000082675 | NA            | 1.57 | 0.57  | 1.05 | 2.22  |
| ENSMUSG00000082676 | NA            | 1.17 | -0.06 | 1.2  | 0.2   |
| ENSMUSG00000082697 | NA            | 3.12 | 1.36  | 1.01 | 1.2   |
| ENSMUSG00000082702 | NA            | 1.31 | 0.87  | 0.59 | 0.37  |
| ENSMUSG00000082787 | NA            | 1.68 | 1.84  | 1.6  | 3.23  |
| ENSMUSG00000082811 | NA            | 1.21 | 1.13  | 1.96 | 1.71  |
| ENSMUSG00000082836 | NA            | 1.58 | 1.36  | 1.6  | 2.71  |
| ENSMUSG00000082876 | NA            | 1.32 | 0.32  | 0.85 | 1.06  |
| ENSMUSG00000082908 | NA            | 2.77 | 3.02  | 2.95 | 3.76  |
| ENSMUSG00000082935 | NA            | 2.7  | 1.64  | 2.35 | 2.38  |
| ENSMUSG00000082992 | NA            | 2.96 | -0.95 | 2.01 | -0.61 |
| ENSMUSG00000082998 | NA            | 1.46 | 0.07  | 0.6  | 2.26  |
| ENSMUSG00000083003 | NA            | 1.22 | 1.49  | 2.24 | 2.89  |
| ENSMUSG00000083012 | 2810453106RiA | 1.9  | 2.42  | 2.18 | 2.07  |

|                    |             |      |       |       |        |
|--------------------|-------------|------|-------|-------|--------|
| ENSMUSG00000083097 | NA          | 1.2  | 0.88  | 0.79  | 1.83   |
| ENSMUSG00000083179 | NA          | 2.78 | 0.31  | 1.55  | 1.77   |
| ENSMUSG00000083194 | NA          | 2.85 | 2.37  | 3.05  | 2.15   |
| ENSMUSG00000083240 | NA          | 2.88 | 2.16  | 2.67  | 0.33   |
| ENSMUSG00000083282 | <i>Ctsf</i> | 3.77 | 4.48  | 3.89  | 4.06   |
| ENSMUSG00000083325 | NA          | 1.32 | 0.21  | 0.91  | 1.28   |
| ENSMUSG00000083327 | NA          | 4.97 | 5.16  | 4.18  | 5.59   |
| ENSMUSG00000083354 | NA          | 3.03 | 3.56  | 3.4   | 3.08   |
| ENSMUSG00000083370 | NA          | 3.45 | 4.01  | 3.99  | 4.25   |
| ENSMUSG00000083405 | NA          | 4.35 | 4.56  | 4.66  | 4.77   |
| ENSMUSG00000083443 | NA          | 1.33 | 1.88  | 1.39  | 2.47   |
| ENSMUSG00000083476 | NA          | 1.79 | 1.07  | -0.19 | 2.29   |
| ENSMUSG00000083478 | NA          | 2.35 | 0.51  | 0.97  | -1.53  |
| ENSMUSG00000083480 | NA          | 2.34 | 2.24  | 2.87  | 3.03   |
| ENSMUSG00000083497 | NA          | 6.68 | 6.66  | 6.4   | 7.16   |
| ENSMUSG00000083557 | NA          | 1.17 | 0.24  | 0.86  | 1.24   |
| ENSMUSG00000083563 | NA          | 2.97 | 0.83  | 0.69  | 0.73   |
| ENSMUSG00000083567 | NA          | 2.3  | 1.15  | 1.2   | 1.15   |
| ENSMUSG00000083621 | NA          | 2.42 | 1.27  | 1.67  | 3.78   |
| ENSMUSG00000083626 | NA          | 2.62 | 0.91  | 2.35  | 2.6    |
| ENSMUSG00000083694 | NA          | 2.18 | 2.11  | 2.39  | 3.01   |
| ENSMUSG00000083696 | NA          | 3.02 | 1.83  | 1.54  | 1.51   |
| ENSMUSG00000083736 | NA          | 1.05 | -0.84 | 0.44  | 1.21   |
| ENSMUSG00000083758 | NA          | 3.8  | 3.48  | 3.53  | 3.26   |
| ENSMUSG00000083773 | NA          | 4.5  | -3.32 | 4.68  | -4.32  |
| ENSMUSG00000083798 | NA          | 2.06 | -3.67 | 2.11  | #NAME? |
| ENSMUSG00000083800 | NA          | 5.47 | 4.26  | 4.72  | 6.12   |
| ENSMUSG00000083829 | NA          | 2.43 | 2.87  | 1.87  | 1.6    |
| ENSMUSG00000083840 | NA          | 5.84 | 5.52  | 5.49  | 5.91   |
| ENSMUSG00000083844 | NA          | 2.86 | 2.92  | 2.82  | 3.27   |
| ENSMUSG00000083863 | NA          | 1.94 | 0.48  | 1.13  | 1.28   |

|                    |               |        |       |       |       |
|--------------------|---------------|--------|-------|-------|-------|
| ENSMUSG00000083892 | NA            | 1.23   | -0.81 | 0.02  | -0.66 |
| ENSMUSG00000083899 | NA            | 2.11   | 0.84  | 0.69  | 2.28  |
| ENSMUSG00000083902 | NA            | 2.56   | 1.79  | 2.03  | 2.38  |
| ENSMUSG00000083992 | NA            | 4.78   | 2.98  | 3.59  | 4.97  |
| ENSMUSG00000084013 | NA            | 3.56   | 3.18  | 2.61  | 4.33  |
| ENSMUSG00000084067 | NA            | 1.56   | -2.61 | 0.52  | -0.61 |
| ENSMUSG00000084093 | NA            | 0.67   | 1.22  | 1.89  | 1.09  |
| ENSMUSG00000084098 | NA            | 3.08   | 2.62  | 2.8   | 3.56  |
| ENSMUSG00000084099 | NA            | 2.16   | 2.7   | 1.7   | 3.18  |
| ENSMUSG00000084128 | <i>Rbm35b</i> | 4.7    | 5.46  | 5.09  | 4.95  |
| ENSMUSG00000084132 | NA            | 1.71   | 0.28  | 1.74  | 0.62  |
| ENSMUSG00000084159 | NA            | 3.32   | 2.21  | 2.47  | 3.64  |
| ENSMUSG00000084215 | NA            | 1.72   | 2.1   | 1.73  | 1.98  |
| ENSMUSG00000084241 | NA            | 1.56   | -0.01 | 0.85  | 0.92  |
| ENSMUSG00000084289 | NA            | 3.83   | 3.36  | 3.29  | 4.79  |
| ENSMUSG00000084319 | NA            | 6.2    | 4.85  | 5.4   | 5.8   |
| ENSMUSG00000084329 | NA            | 2.59   | 2.29  | 1.9   | 2.52  |
| ENSMUSG00000084347 | NA            | 1.82   | 2.59  | 2.43  | 2.92  |
| ENSMUSG00000084349 | NA            | 2.76   | 2.38  | 2.58  | 3.45  |
| ENSMUSG00000084384 | NA            | 3.25   | 1.88  | 2.45  | 3.59  |
| ENSMUSG00000084398 | NA            | 2.41   | 1.53  | 2.65  | 2.78  |
| ENSMUSG00000084416 | NA            | 0.61   | 1.15  | 1.71  | 3.21  |
| ENSMUSG00000084479 | NA            | 1.19   | -0.19 | 0.56  | -3.12 |
| ENSMUSG00000084514 | NA            | 0.67   | 1.7   | 1.79  | 1.74  |
| ENSMUSG00000084516 | NA            | 4.42   | 3.07  | 4.32  | 4.38  |
| ENSMUSG00000084523 | NA            | 4.2    | 1.8   | 4.06  | 4.1   |
| ENSMUSG00000084565 | NA            | -0.83  | 1.61  | 2.51  | 1.5   |
| ENSMUSG00000084590 | NA            | 4.08   | 3.44  | 4.15  | 3.61  |
| ENSMUSG00000084616 | NA            | 1.86   | 1.07  | -0.43 | -0.84 |
| ENSMUSG00000084691 | NA            | #NAME? | -0.57 | 1.43  | 1.02  |
| ENSMUSG00000084708 | NA            | 1.02   | -1.53 | -0.53 | -0.87 |

|                    |           |       |       |       |       |
|--------------------|-----------|-------|-------|-------|-------|
| ENSMUSG00000084724 | <i>NA</i> | 5.37  | 5.03  | 4.64  | 4.16  |
| ENSMUSG00000084735 | <i>NA</i> | 10.99 | 11.01 | 11.14 | 10.97 |

**Supplementary Table S11** Enrichment in biological process GO-terms (all levels) of upregulated expressed genes (fold change >2) between *Smarc1<sup>del/del</sup>* and *wt* mouse livers at 20°C.

| Term                                                                                           | Count | PValue      | Fold Enrichment |
|------------------------------------------------------------------------------------------------|-------|-------------|-----------------|
| GO:0009987~cellular process                                                                    | 168   | 0.002641961 | 1.137409509     |
| GO:0008152~metabolic process                                                                   | 126   | 0.041472607 | 1.124285553     |
| GO:0044238~primary metabolic process                                                           | 119   | 0.005718276 | 1.200130932     |
| GO:0044237~cellular metabolic process                                                          | 110   | 0.018369419 | 1.176415284     |
| GO:0043170~macromolecule metabolic process                                                     | 104   | 0.001672704 | 1.274839867     |
| GO:0044260~cellular macromolecule metabolic process                                            | 95    | 0.001393976 | 1.308129879     |
| GO:0010467~gene expression                                                                     | 77    | 1.23E-08    | 1.87599573      |
| GO:0034641~cellular nitrogen compound metabolic process                                        | 77    | 2.61E-05    | 1.553360716     |
| GO:0006807~nitrogen compound metabolic process                                                 | 77    | 7.25E-05    | 1.509131734     |
| GO:0006139~nucleobase, nucleoside, nucleotide and nucleic acid metabolic process               | 71    | 8.23E-05    | 1.54368359      |
| GO:0009058~biosynthetic process                                                                | 69    | 0.001702868 | 1.405095868     |
| GO:0019222~regulation of metabolic process                                                     | 68    | 8.38E-04    | 1.447802897     |
| GO:0044249~cellular biosynthetic process                                                       | 68    | 0.001191447 | 1.429340981     |
| GO:0034645~cellular macromolecule biosynthetic process                                         | 63    | 4.07E-05    | 1.645638987     |
| GO:0009059~macromolecule biosynthetic process                                                  | 63    | 4.50E-05    | 1.640167203     |
| GO:0060255~regulation of macromolecule metabolic process                                       | 63    | 0.00102386  | 1.46809609      |
| GO:0031323~regulation of cellular metabolic process                                            | 63    | 0.002514426 | 1.416454519     |
| GO:0080090~regulation of primary metabolic process                                             | 62    | 0.001479369 | 1.453444433     |
| GO:0032502~developmental process                                                               | 59    | 0.010833413 | 1.347315795     |
| GO:0010468~regulation of gene expression                                                       | 57    | 0.001966547 | 1.469909301     |
| GO:0007275~multicellular organismal development                                                | 57    | 0.004506159 | 1.416267232     |
| GO:0031326~regulation of cellular biosynthetic process                                         | 56    | 0.00455405  | 1.421877148     |
| GO:0009889~regulation of biosynthetic process                                                  | 56    | 0.004919706 | 1.416708774     |
| GO:0010556~regulation of macromolecule biosynthetic process                                    | 55    | 0.003461829 | 1.446926568     |
| GO:0019219~regulation of nucleobase, nucleoside, nucleotide and nucleic acid metabolic process | 54    | 0.004396992 | 1.437523754     |
| GO:0051171~regulation of nitrogen compound metabolic process                                   | 54    | 0.005191711 | 1.426009019     |
| GO:0045449~regulation of transcription                                                         | 53    | 0.002262042 | 1.490729513     |



|                                                                        |    |             |             |
|------------------------------------------------------------------------|----|-------------|-------------|
| GO:0006350~transcription                                               | 49 | 1.30E-04    | 1.732110361 |
| GO:0048856~anatomical structure development                            | 47 | 0.02301666  | 1.356692178 |
| GO:0048731~system development                                          | 43 | 0.04103519  | 1.328794751 |
| GO:0048518~positive regulation of biological process                   | 40 | 0.001247878 | 1.678198701 |
| GO:0030154~cell differentiation                                        | 38 | 0.009112483 | 1.517063816 |
| GO:0048869~cellular developmental process                              | 38 | 0.016942011 | 1.454934675 |
| GO:0048513~organ development                                           | 37 | 0.033211865 | 1.393646639 |
| GO:0048522~positive regulation of cellular process                     | 36 | 0.001771508 | 1.708329996 |
| GO:0006950~response to stress                                          | 32 | 0.003969109 | 1.692939636 |
| GO:0048523~negative regulation of cellular process                     | 32 | 0.004381093 | 1.681577625 |
| GO:0048519~negative regulation of biological process                   | 32 | 0.018742393 | 1.511644441 |
| GO:0042981~regulation of apoptosis                                     | 28 | 2.13E-07    | 3.171583115 |
| GO:0043067~regulation of programmed cell death                         | 28 | 2.77E-07    | 3.131938326 |
| GO:0010941~regulation of cell death                                    | 28 | 3.05E-07    | 3.115249489 |
| GO:0007242~intracellular signaling cascade                             | 28 | 0.00138857  | 1.916814713 |
| GO:0016070~RNA metabolic process                                       | 25 | 1.43E-04    | 2.365512331 |
| GO:0043065~positive regulation of apoptosis                            | 19 | 8.82E-08    | 4.798937758 |
| GO:0043068~positive regulation of programmed cell death                | 19 | 9.95E-08    | 4.760546256 |
| GO:0010942~positive regulation of cell death                           | 19 | 1.12E-07    | 4.722764142 |
| GO:0009790~embryonic development                                       | 19 | 0.020838927 | 1.77632323  |
| GO:0051716~cellular response to stimulus                               | 18 | 0.007637899 | 2.027873736 |
| GO:0009605~response to external stimulus                               | 18 | 0.026914448 | 1.761715308 |
| GO:0048468~cell development                                            | 17 | 0.034895793 | 1.742813471 |
| GO:0006357~regulation of transcription from RNA polymerase II promoter | 17 | 0.037331128 | 1.728667258 |
| GO:0006396~RNA processing                                              | 16 | 0.004303463 | 2.293410216 |
| GO:0033554~cellular response to stress                                 | 15 | 0.005324625 | 2.325696777 |
| GO:0043009~chordate embryonic development                              | 15 | 0.007488582 | 2.23178503  |
| GO:0009792~embryonic development ending in birth or egg hatching       | 15 | 0.008095696 | 2.210779995 |
| GO:0031324~negative regulation of cellular metabolic process           | 15 | 0.024559617 | 1.921434556 |
| GO:0009892~negative regulation of metabolic process                    | 15 | 0.046216925 | 1.759515913 |
| GO:0031327~negative regulation of cellular biosynthetic process        | 14 | 0.019983076 | 2.039401701 |

|                                                                                        |    |             |             |
|----------------------------------------------------------------------------------------|----|-------------|-------------|
| GO:0009890~negative regulation of biosynthetic process                                 | 14 | 0.021588102 | 2.020605372 |
| GO:0012501~programmed cell death                                                       | 14 | 0.03909713  | 1.854001546 |
| GO:0006917~induction of apoptosis                                                      | 13 | 1.46E-05    | 4.876071645 |
| GO:0012502~induction of programmed cell death                                          | 13 | 1.46E-05    | 4.876071645 |
| GO:0010558~negative regulation of macromolecule biosynthetic process                   | 13 | 0.035038155 | 1.948095609 |
| GO:0001701~in utero embryonic development                                              | 12 | 0.003666728 | 2.815225462 |
| GO:0006412~translation                                                                 | 12 | 0.013128177 | 2.356317236 |
| GO:0000122~negative regulation of transcription from RNA polymerase II promoter        | 11 | 0.003909218 | 2.982798406 |
| GO:0007264~small GTPase mediated signal transduction                                   | 11 | 0.008344968 | 2.670645084 |
| GO:0006974~response to DNA damage stimulus                                             | 11 | 0.016570406 | 2.400788961 |
| GO:0045892~negative regulation of transcription, DNA-dependent                         | 11 | 0.02551341  | 2.237098804 |
| GO:0051253~negative regulation of RNA metabolic process                                | 11 | 0.026733462 | 2.222665909 |
| GO:0034470~ncRNA processing                                                            | 10 | 9.56E-04    | 3.964478894 |
| GO:0034660~ncRNA metabolic process                                                     | 10 | 0.005046953 | 3.100929036 |
| GO:0001944~vasculature development                                                     | 10 | 0.018670222 | 2.505550661 |
| GO:0001568~blood vessel development                                                    | 9  | 0.04153762  | 2.310446306 |
| GO:0046578~regulation of Ras protein signal transduction                               | 8  | 0.025696357 | 2.768564266 |
| GO:0048514~blood vessel morphogenesis                                                  | 8  | 0.038985868 | 2.530859253 |
| GO:0006351~transcription, DNA-dependent                                                | 7  | 0.01325368  | 3.594027587 |
| GO:0032774~RNA biosynthetic process                                                    | 7  | 0.015334994 | 3.479931473 |
| GO:0009991~response to extracellular stimulus                                          | 7  | 0.01950439  | 3.296777185 |
| GO:0002460~adaptive immune response based on somatic recombination of immune receptors | 6  | 0.010847465 | 4.474197609 |
| GO:0002250~adaptive immune response                                                    | 6  | 0.010847465 | 4.474197609 |
| GO:0035023~regulation of Rho protein signal transduction                               | 6  | 0.011930806 | 4.370146501 |
| GO:0051789~response to protein stimulus                                                | 6  | 0.012499086 | 4.319914932 |
| GO:0031667~response to nutrient levels                                                 | 6  | 0.036506779 | 3.268109558 |
| GO:0009451~RNA modification                                                            | 5  | 0.00433406  | 7.456996014 |
| GO:0006959~humoral immune response                                                     | 5  | 0.010565775 | 5.799885789 |
| GO:0007050~cell cycle arrest                                                           | 5  | 0.012721112 | 5.494628642 |
| GO:0042770~DNA damage response, signal transduction                                    | 5  | 0.012721112 | 5.494628642 |
| GO:0001666~response to hypoxia                                                         | 5  | 0.018785915 | 4.893653634 |

|                                                                                            |   |             |             |
|--------------------------------------------------------------------------------------------|---|-------------|-------------|
| GO:0070482~response to oxygen levels                                                       | 5 | 0.019775435 | 4.818366655 |
| GO:0008033~tRNA processing                                                                 | 5 | 0.02520166  | 4.474197609 |
| GO:0030330~DNA damage response, signal transduction by p53 class mediator                  | 4 | 0.003181089 | 13.18710874 |
| GO:0008630~DNA damage response, signal transduction resulting in induction of apoptosis    | 4 | 0.005548627 | 10.89369853 |
| GO:0007266~Rho protein signal transduction                                                 | 4 | 0.008747268 | 9.279817262 |
| GO:0008629~induction of apoptosis by intracellular signals                                 | 4 | 0.017840719 | 7.158716174 |
| GO:0002455~humoral immune response mediated by circulating immunoglobulin                  | 4 | 0.017840719 | 7.158716174 |
| GO:0031668~cellular response to extracellular stimulus                                     | 4 | 0.034479228 | 5.567890357 |
| GO:0009266~response to temperature stimulus                                                | 4 | 0.047250824 | 4.912844433 |
| GO:0042771~DNA damage response, signal transduction by p53 class mediator resulting in ind | 3 | 0.020182964 | 13.42259283 |
| GO:0002886~regulation of myeloid leukocyte mediated immunity                               | 3 | 0.023047212 | 12.5277533  |
| GO:0006400~tRNA modification                                                               | 3 | 0.026067652 | 11.74476872 |
| GO:0045682~regulation of epidermis development                                             | 3 | 0.032554682 | 10.43979442 |
| GO:0032764~negative regulation of mast cell cytokine production                            | 2 | 0.031536926 | 62.63876652 |
| GO:0042092~T-helper 2 type immune response                                                 | 2 | 0.031536926 | 62.63876652 |
| GO:0002701~negative regulation of production of molecular mediator of immune response      | 2 | 0.046932062 | 41.75917768 |
| GO:0002719~negative regulation of cytokine production during immune response               | 2 | 0.046932062 | 41.75917768 |
| GO:0032763~regulation of mast cell cytokine production                                     | 2 | 0.046932062 | 41.75917768 |

**Supplementary Table S12** Enrichment in biological process GO-terms (all levels) of downregulated expressed genes (fold change >2) between *Smarc1<sup>del/del</sup>* and *wt* mouse livers at 20°C.

| Term                                                                                           | Count | PValue      | Fold Enrichment |
|------------------------------------------------------------------------------------------------|-------|-------------|-----------------|
| GO:0009987~cellular process                                                                    | 391   | 1.17E-05    | 1.131659221     |
| GO:0008152~metabolic process                                                                   | 343   | 5.69E-13    | 1.308372903     |
| GO:0044238~primary metabolic process                                                           | 293   | 4.96E-08    | 1.263224745     |
| GO:0044237~cellular metabolic process                                                          | 290   | 1.99E-10    | 1.325858896     |
| GO:0043170~macromolecule metabolic process                                                     | 231   | 1.85E-04    | 1.210502283     |
| GO:0044260~cellular macromolecule metabolic process                                            | 218   | 6.15E-06    | 1.283261278     |
| GO:0009058~biosynthetic process                                                                | 159   | 4.32E-06    | 1.384156914     |
| GO:0044249~cellular biosynthetic process                                                       | 155   | 4.28E-06    | 1.392803878     |
| GO:0006807~nitrogen compound metabolic process                                                 | 152   | 5.89E-04    | 1.273536365     |
| GO:0034641~cellular nitrogen compound metabolic process                                        | 148   | 6.43E-04    | 1.276364287     |
| GO:0006139~nucleobase, nucleoside, nucleotide and nucleic acid metabolic process               | 141   | 2.93E-04    | 1.310540322     |
| GO:0019222~regulation of metabolic process                                                     | 128   | 0.034484236 | 1.165042677     |
| GO:0010467~gene expression                                                                     | 126   | 6.91E-04    | 1.312329833     |
| GO:0034645~cellular macromolecule biosynthetic process                                         | 122   | 1.94E-04    | 1.362338986     |
| GO:0009059~macromolecule biosynthetic process                                                  | 122   | 2.29E-04    | 1.357809181     |
| GO:0060255~regulation of macromolecule metabolic process                                       | 121   | 0.015912722 | 1.205398479     |
| GO:0080090~regulation of primary metabolic process                                             | 119   | 0.023253486 | 1.192573187     |
| GO:0019538~protein metabolic process                                                           | 115   | 0.034991225 | 1.177607818     |
| GO:0010468~regulation of gene expression                                                       | 110   | 0.019242851 | 1.212661818     |
| GO:0031326~regulation of cellular biosynthetic process                                         | 109   | 0.03676522  | 1.183128406     |
| GO:0009889~regulation of biosynthetic process                                                  | 109   | 0.039317286 | 1.178827859     |
| GO:0051171~regulation of nitrogen compound metabolic process                                   | 107   | 0.023060951 | 1.20793517      |
| GO:0010556~regulation of macromolecule biosynthetic process                                    | 107   | 0.025084653 | 1.203369266     |
| GO:0006810~transport                                                                           | 106   | 0.021882276 | 1.211974571     |
| GO:0019219~regulation of nucleobase, nucleoside, nucleotide and nucleic acid metabolic process | 106   | 0.025307516 | 1.206308731     |
| GO:0051234~establishment of localization                                                       | 106   | 0.026288695 | 1.203750825     |
| GO:0044267~cellular protein metabolic process                                                  | 105   | 9.52E-04    | 1.346583653     |

|                                                                         |     |             |             |
|-------------------------------------------------------------------------|-----|-------------|-------------|
| GO:0045449~regulation of transcription                                  | 103 | 0.013613902 | 1.238487252 |
| GO:0006350~transcription                                                | 89  | 0.002767204 | 1.344933534 |
| GO:0006464~protein modification process                                 | 60  | 0.039632935 | 1.275132275 |
| GO:0009056~catabolic process                                            | 54  | 0.012234347 | 1.390384615 |
| GO:0033036~macromolecule localization                                   | 48  | 0.012274357 | 1.424981523 |
| GO:0044248~cellular catabolic process                                   | 47  | 0.006673421 | 1.484145702 |
| GO:0006629~lipid metabolic process                                      | 46  | 2.25E-04    | 1.769795658 |
| GO:0009057~macromolecule catabolic process                              | 45  | 1.04E-04    | 1.842507645 |
| GO:0030163~protein catabolic process                                    | 43  | 1.08E-05    | 2.070943245 |
| GO:0044265~cellular macromolecule catabolic process                     | 43  | 9.07E-05    | 1.890713373 |
| GO:0051603~proteolysis involved in cellular protein catabolic process   | 41  | 2.14E-05    | 2.055971702 |
| GO:0044257~cellular protein catabolic process                           | 41  | 2.45E-05    | 2.044485827 |
| GO:0008104~protein localization                                         | 39  | 0.035654369 | 1.386896857 |
| GO:0019941~modification-dependent protein catabolic process             | 38  | 7.88E-05    | 2.003062117 |
| GO:0043632~modification-dependent macromolecule catabolic process       | 38  | 7.88E-05    | 2.003062117 |
| GO:0007049~cell cycle                                                   | 36  | 0.007789552 | 1.577741408 |
| GO:0015031~protein transport                                            | 36  | 0.018992568 | 1.480798771 |
| GO:0045184~establishment of protein localization                        | 36  | 0.020583667 | 1.469512195 |
| GO:0044255~cellular lipid metabolic process                             | 28  | 0.022949004 | 1.555555556 |
| GO:0022402~cell cycle process                                           | 24  | 0.022339819 | 1.635284139 |
| GO:0022403~cell cycle phase                                             | 21  | 0.021679455 | 1.714430894 |
| GO:0000278~mitotic cell cycle                                           | 19  | 0.004626069 | 2.085154827 |
| GO:0055086~nucleobase, nucleoside and nucleotide metabolic process      | 19  | 0.012146806 | 1.891367204 |
| GO:0051301~cell division                                                | 18  | 0.03441481  | 1.715302491 |
| GO:0008610~lipid biosynthetic process                                   | 18  | 0.038563972 | 1.69122807  |
| GO:0009117~nucleotide metabolic process                                 | 17  | 0.023018101 | 1.843004948 |
| GO:0006753~nucleoside phosphate metabolic process                       | 17  | 0.023018101 | 1.843004948 |
| GO:0006511~ubiquitin-dependent protein catabolic process                | 14  | 0.002354923 | 2.658786446 |
| GO:0070647~protein modification by small protein conjugation or removal | 13  | 4.84E-04    | 3.347222222 |
| GO:0008202~steroid metabolic process                                    | 13  | 0.017438114 | 2.162180814 |
| GO:0009165~nucleotide biosynthetic process                              | 13  | 0.02979772  | 2.00063857  |

|                                                                                     |    |             |             |
|-------------------------------------------------------------------------------------|----|-------------|-------------|
| GO:0034654~nucleobase, nucleoside, nucleotide and nucleic acid biosynthetic process | 13 | 0.035923876 | 1.944754811 |
| GO:0034404~nucleobase, nucleoside and nucleotide biosynthetic process               | 13 | 0.035923876 | 1.944754811 |
| GO:0032446~protein modification by small protein conjugation                        | 10 | 0.002625486 | 3.389592124 |
| GO:0009152~purine ribonucleotide biosynthetic process                               | 10 | 0.018414059 | 2.502596054 |
| GO:0009260~ribonucleotide biosynthetic process                                      | 10 | 0.02281297  | 2.412412412 |
| GO:0022900~electron transport chain                                                 | 10 | 0.024020833 | 2.390873016 |
| GO:0009150~purine ribonucleotide metabolic process                                  | 10 | 0.033774613 | 2.250233427 |
| GO:0009259~ribonucleotide metabolic process                                         | 10 | 0.044069951 | 2.142222222 |
| GO:0016567~protein ubiquitination                                                   | 9  | 0.003033492 | 3.651515152 |
| GO:0009206~purine ribonucleoside triphosphate biosynthetic process                  | 9  | 0.022608486 | 2.591397849 |
| GO:0009201~ribonucleoside triphosphate biosynthetic process                         | 9  | 0.022608486 | 2.591397849 |
| GO:0009145~purine nucleoside triphosphate biosynthetic process                      | 9  | 0.023937549 | 2.563829787 |
| GO:0009142~nucleoside triphosphate biosynthetic process                             | 9  | 0.025320479 | 2.536842105 |
| GO:0009205~purine ribonucleoside triphosphate metabolic process                     | 9  | 0.034801002 | 2.386138614 |
| GO:0009199~ribonucleoside triphosphate metabolic process                            | 9  | 0.036586194 | 2.362745098 |
| GO:0009144~purine nucleoside triphosphate metabolic process                         | 9  | 0.04434035  | 2.273584906 |
| GO:0045454~cell redox homeostasis                                                   | 8  | 0.008026038 | 3.455197133 |
| GO:0051236~establishment of RNA localization                                        | 8  | 0.011197479 | 3.245791246 |
| GO:0050657~nucleic acid transport                                                   | 8  | 0.011197479 | 3.245791246 |
| GO:0050658~RNA transport                                                            | 8  | 0.011197479 | 3.245791246 |
| GO:0006403~RNA localization                                                         | 8  | 0.012114748 | 3.1973466   |
| GO:0015931~nucleobase, nucleoside, nucleotide and nucleic acid transport            | 8  | 0.020105616 | 2.894894895 |
| GO:0006754~ATP biosynthetic process                                                 | 8  | 0.033055356 | 2.612466125 |
| GO:0051028~mRNA transport                                                           | 7  | 0.02751857  | 3.023297491 |
| GO:0046777~protein amino acid autophosphorylation                                   | 7  | 0.035972482 | 2.84006734  |
| GO:0051325~interphase                                                               | 6  | 0.04063239  | 3.150326797 |
| GO:0030518~steroid hormone receptor signaling pathway                               | 4  | 0.041583328 | 5.100529101 |
| GO:0060322~head development                                                         | 4  | 0.041583328 | 5.100529101 |
| GO:0030521~androgen receptor signaling pathway                                      | 3  | 0.025712762 | 11.47619048 |

**Supplementary Table S13** Enrichment in biological process GO-terms (all levels) of upregulated expressed genes (fold change >2) between *Smarc1<sup>del/del</sup>* and *wt* mouse livers at 39.5°C.

| Term                                                   | Count | PValue      | Fold Enrichment |
|--------------------------------------------------------|-------|-------------|-----------------|
| GO:0008152~metabolic process                           | 23    | 0.003300414 | 1.552882241     |
| GO:0044237~cellular metabolic process                  | 20    | 0.007034519 | 1.618462239     |
| GO:0044238~primary metabolic process                   | 20    | 0.014637179 | 1.526216927     |
| GO:0043170~macromolecule metabolic process             | 18    | 0.01055318  | 1.669549902     |
| GO:0044260~cellular macromolecule metabolic process    | 17    | 0.00816963  | 1.771253755     |
| GO:0009058~biosynthetic process                        | 13    | 0.013022419 | 2.0031101       |
| GO:0010467~gene expression                             | 12    | 0.00933004  | 2.212213147     |
| GO:0044249~cellular biosynthetic process               | 12    | 0.027232697 | 1.908590604     |
| GO:0034645~cellular macromolecule biosynthetic process | 11    | 0.016557519 | 2.174159021     |
| GO:0009059~macromolecule biosynthetic process          | 11    | 0.016931463 | 2.166929897     |
| GO:0044267~cellular protein metabolic process          | 10    | 0.019537026 | 2.2699553       |
| GO:0009057~macromolecule catabolic process             | 6     | 0.009614252 | 4.348318043     |
| GO:0006412~translation                                 | 5     | 0.003791732 | 7.428944619     |
| GO:0044257~cellular protein catabolic process          | 5     | 0.022593811 | 4.413097455     |
| GO:0030163~protein catabolic process                   | 5     | 0.025292651 | 4.262290168     |
| GO:0044265~cellular macromolecule catabolic process    | 5     | 0.03383289  | 3.891351943     |
| GO:0001889~liver development                           | 3     | 0.003443706 | 33.06744186     |
| GO:0006351~transcription, DNA-dependent                | 3     | 0.025489793 | 11.65491803     |
| GO:0032774~RNA biosynthetic process                    | 3     | 0.027060159 | 11.28492063     |

**Supplementary Table S14** Enrichment in biological process GO-terms (all levels) of downregulated expressed genes (fold change >2) between *Smarc1<sup>del/del</sup>* and *wt* mouse livers at 39.5°C.

| Term                                                    | Count | PValue      | Fold Enrichment |
|---------------------------------------------------------|-------|-------------|-----------------|
| GO:0008152~metabolic process                            | 103   | 0.016272015 | 1.172058164     |
| GO:0050896~response to stimulus                         | 45    | 0.005603062 | 1.475047604     |
| GO:0002376~immune system process                        | 34    | 7.00E-10    | 3.433614114     |
| GO:0048518~positive regulation of biological process    | 27    | 0.048865517 | 1.444617955     |
| GO:0006955~immune response                              | 23    | 9.55E-08    | 3.90082063      |
| GO:0007242~intracellular signaling cascade              | 22    | 0.004868256 | 1.92066065      |
| GO:0048583~regulation of response to stimulus           | 19    | 1.58E-07    | 4.599267961     |
| GO:0002682~regulation of immune system process          | 18    | 5.61E-07    | 4.465454672     |
| GO:0002684~positive regulation of immune system process | 16    | 4.33E-08    | 6.20442893      |
| GO:0050776~regulation of immune response                | 15    | 1.14E-07    | 6.273457262     |
| GO:0002520~immune system development                    | 15    | 1.95E-05    | 4.061797753     |
| GO:0007049~cell cycle                                   | 14    | 0.041924611 | 1.830357307     |
| GO:0048534~hemopoietic or lymphoid organ development    | 13    | 2.09E-04    | 3.695609581     |
| GO:0032879~regulation of localization                   | 13    | 0.004894491 | 2.557798749     |
| GO:0042981~regulation of apoptosis                      | 13    | 0.043815882 | 1.877877563     |
| GO:0043067~regulation of programmed cell death          | 13    | 0.047401685 | 1.854404093     |
| GO:0010941~regulation of cell death                     | 13    | 0.048998886 | 1.844522721     |
| GO:0050778~positive regulation of immune response       | 12    | 1.03E-06    | 7.048413748     |
| GO:0048584~positive regulation of response to stimulus  | 12    | 2.12E-05    | 5.153678869     |
| GO:0006952~defense response                             | 12    | 0.024600279 | 2.13969703      |
| GO:0051249~regulation of lymphocyte activation          | 11    | 1.26E-05    | 6.102098939     |
| GO:0002694~regulation of leukocyte activation           | 11    | 2.27E-05    | 5.705858748     |
| GO:0050865~regulation of cell activation                | 11    | 2.53E-05    | 5.632706713     |
| GO:0001775~cell activation                              | 11    | 0.001033108 | 3.571960354     |
| GO:0002253~activation of immune response                | 10    | 1.18E-06    | 9.288607264     |
| GO:0051251~positive regulation of lymphocyte activation | 10    | 2.51E-06    | 8.498087497     |
| GO:0002696~positive regulation of leukocyte activation  | 10    | 3.88E-06    | 8.068891159     |



|                                                                                           |    |             |             |
|-------------------------------------------------------------------------------------------|----|-------------|-------------|
| GO:0050867~positive regulation of cell activation                                         | 10 | 4.58E-06    | 7.909111136 |
| GO:0045321~leukocyte activation                                                           | 10 | 0.00169721  | 3.647580935 |
| GO:0030097~hemopoiesis                                                                    | 10 | 0.004225054 | 3.182550696 |
| GO:0046649~lymphocyte activation                                                          | 9  | 0.002706634 | 3.764074357 |
| GO:0043065~positive regulation of apoptosis                                               | 9  | 0.012474879 | 2.898944364 |
| GO:0043068~positive regulation of programmed cell death                                   | 9  | 0.013084144 | 2.875752809 |
| GO:0010942~positive regulation of cell death                                              | 9  | 0.013697532 | 2.852929374 |
| GO:0008284~positive regulation of cell proliferation                                      | 9  | 0.025881579 | 2.531472543 |
| GO:0002460~adaptive immune response based on somatic recombination of immune receptors bu | 8  | 8.32E-05    | 7.607811664 |
| GO:0002250~adaptive immune response                                                       | 8  | 8.32E-05    | 7.607811664 |
| GO:0002697~regulation of immune effector process                                          | 8  | 1.12E-04    | 7.262002043 |
| GO:0080134~regulation of response to stress                                               | 8  | 0.009212006 | 3.399234999 |
| GO:0007243~protein kinase cascade                                                         | 8  | 0.028380712 | 2.707865169 |
| GO:0000278~mitotic cell cycle                                                             | 8  | 0.033158027 | 2.619082704 |
| GO:0050851~antigen receptor-mediated signaling pathway                                    | 7  | 4.88E-06    | 15.53261548 |
| GO:0002429~immune response-activating cell surface receptor signaling pathway             | 7  | 1.07E-05    | 13.63839408 |
| GO:0002768~immune response-regulating cell surface receptor signaling pathway             | 7  | 1.63E-05    | 12.70850358 |
| GO:0002699~positive regulation of immune effector process                                 | 7  | 2.12E-05    | 12.15595994 |
| GO:0002757~immune response-activating signal transduction                                 | 7  | 2.72E-05    | 11.64946161 |
| GO:0050671~positive regulation of lymphocyte proliferation                                | 7  | 3.45E-05    | 11.18348315 |
| GO:0032946~positive regulation of mononuclear cell proliferation                          | 7  | 3.45E-05    | 11.18348315 |
| GO:0070665~positive regulation of leukocyte proliferation                                 | 7  | 4.33E-05    | 10.75334918 |
| GO:0002764~immune response-regulating signal transduction                                 | 7  | 4.33E-05    | 10.75334918 |
| GO:0050864~regulation of B cell activation                                                | 7  | 5.98E-05    | 10.16680286 |
| GO:0002703~regulation of leukocyte mediated immunity                                      | 7  | 2.32E-04    | 7.988202247 |
| GO:0042113~B cell activation                                                              | 7  | 4.18E-04    | 7.168899453 |
| GO:0050670~regulation of lymphocyte proliferation                                         | 7  | 4.79E-04    | 6.989676966 |
| GO:0032944~regulation of mononuclear cell proliferation                                   | 7  | 4.79E-04    | 6.989676966 |
| GO:0070663~regulation of leukocyte proliferation                                          | 7  | 5.47E-04    | 6.81919704  |
| GO:0050863~regulation of T cell activation                                                | 7  | 0.002293823 | 5.177538494 |
| GO:0002252~immune effector process                                                        | 7  | 0.004917707 | 4.437890137 |

|                                                                                           |   |             |             |
|-------------------------------------------------------------------------------------------|---|-------------|-------------|
| GO:0002521~leukocyte differentiation                                                      | 7 | 0.008689088 | 3.937846178 |
| GO:0010627~regulation of protein kinase cascade                                           | 7 | 0.013010348 | 3.607575208 |
| GO:0009967~positive regulation of signal transduction                                     | 7 | 0.020681219 | 3.251012542 |
| GO:0010647~positive regulation of cell communication                                      | 7 | 0.030931302 | 2.958593425 |
| GO:0007067~mitosis                                                                        | 7 | 0.031660108 | 2.943021881 |
| GO:0000280~nuclear division                                                               | 7 | 0.031660108 | 2.943021881 |
| GO:0000087~M phase of mitotic cell cycle                                                  | 7 | 0.03454287  | 2.882341017 |
| GO:0048285~organelle fission                                                              | 7 | 0.036832348 | 2.838447499 |
| GO:0050853~B cell receptor signaling pathway                                              | 6 | 5.16E-07    | 34.23515249 |
| GO:0050871~positive regulation of B cell activation                                       | 6 | 8.92E-05    | 12.95384148 |
| GO:0016064~immunoglobulin mediated immune response                                        | 6 | 0.001107776 | 7.607811664 |
| GO:0019724~B cell mediated immunity                                                       | 6 | 0.001276053 | 7.373725151 |
| GO:0002706~regulation of lymphocyte mediated immunity                                     | 6 | 0.001276053 | 7.373725151 |
| GO:0002449~lymphocyte mediated immunity                                                   | 6 | 0.002557754 | 6.306475458 |
| GO:0002443~leukocyte mediated immunity                                                    | 6 | 0.005050415 | 5.385304886 |
| GO:0043408~regulation of MAPKKK cascade                                                   | 6 | 0.006077862 | 5.153678869 |
| GO:0031347~regulation of defense response                                                 | 6 | 0.009273909 | 4.653321697 |
| GO:0030098~lymphocyte differentiation                                                     | 6 | 0.01395435  | 4.204316972 |
| GO:0016053~organic acid biosynthetic process                                              | 6 | 0.031544275 | 3.399234999 |
| GO:0046394~carboxylic acid biosynthetic process                                           | 6 | 0.031544275 | 3.399234999 |
| GO:0006260~DNA replication                                                                | 6 | 0.041482863 | 3.153237729 |
| GO:0030888~regulation of B cell proliferation                                             | 5 | 6.36E-04    | 12.48156601 |
| GO:0002705~positive regulation of leukocyte mediated immunity                             | 5 | 0.001495156 | 9.985252809 |
| GO:0002708~positive regulation of lymphocyte mediated immunity                            | 5 | 0.001495156 | 9.985252809 |
| GO:0030183~B cell differentiation                                                         | 5 | 0.002519638 | 8.68282853  |
| GO:0006959~humoral immune response                                                        | 5 | 0.004521448 | 7.396483562 |
| GO:0002822~regulation of adaptive immune response based on somatic recombination of immun | 5 | 0.005151322 | 7.132323435 |
| GO:0002819~regulation of adaptive immune response                                         | 5 | 0.005151322 | 7.132323435 |
| GO:0050727~regulation of inflammatory response                                            | 5 | 0.005487218 | 7.007194954 |
| GO:0050870~positive regulation of T cell activation                                       | 5 | 0.009185436 | 6.051668369 |
| GO:0002526~acute inflammatory response                                                    | 5 | 0.018381732 | 4.930989041 |

|                                                                                             |   |             |             |
|---------------------------------------------------------------------------------------------|---|-------------|-------------|
| GO:0010740~positive regulation of protein kinase cascade                                    | 5 | 0.024110205 | 4.538751277 |
| GO:0032101~regulation of response to external stimulus                                      | 5 | 0.039684279 | 3.877768081 |
| GO:0042330~taxis                                                                            | 5 | 0.047201078 | 3.664312957 |
| GO:0006935~chemotaxis                                                                       | 5 | 0.047201078 | 3.664312957 |
| GO:0030890~positive regulation of B cell proliferation                                      | 4 | 0.002453711 | 14.52400409 |
| GO:0002889~regulation of immunoglobulin mediated immune response                            | 4 | 0.006014582 | 10.65093633 |
| GO:0002712~regulation of B cell mediated immunity                                           | 4 | 0.006014582 | 10.65093633 |
| GO:0002824~positive regulation of adaptive immune response based on somatic recombination o | 4 | 0.008549035 | 9.397884997 |
| GO:0046634~regulation of alpha-beta T cell activation                                       | 4 | 0.008549035 | 9.397884997 |
| GO:0002821~positive regulation of adaptive immune response                                  | 4 | 0.008549035 | 9.397884997 |
| GO:0042102~positive regulation of T cell proliferation                                      | 4 | 0.009266223 | 9.129373997 |
| GO:0002455~humoral immune response mediated by circulating immunoglobulin                   | 4 | 0.009266223 | 9.129373997 |
| GO:0046651~lymphocyte proliferation                                                         | 4 | 0.015257265 | 7.607811664 |
| GO:0032943~mononuclear cell proliferation                                                   | 4 | 0.016254455 | 7.430885811 |
| GO:0070661~leukocyte proliferation                                                          | 4 | 0.016254455 | 7.430885811 |
| GO:0043410~positive regulation of MAPKKK cascade                                            | 4 | 0.020602171 | 6.798469998 |
| GO:0050730~regulation of peptidyl-tyrosine phosphorylation                                  | 4 | 0.028205284 | 6.028831885 |
| GO:0031349~positive regulation of defense response                                          | 4 | 0.033992386 | 5.605755963 |
| GO:0045619~regulation of lymphocyte differentiation                                         | 4 | 0.03552811  | 5.509104998 |
| GO:0051052~regulation of DNA metabolic process                                              | 4 | 0.03552811  | 5.509104998 |
| GO:0042129~regulation of T cell proliferation                                               | 4 | 0.037099138 | 5.415730337 |
| GO:0043406~positive regulation of MAP kinase activity                                       | 4 | 0.037099138 | 5.415730337 |
| GO:0007059~chromosome segregation                                                           | 4 | 0.04547771  | 4.992626404 |
| GO:0051605~protein maturation by peptide bond cleavage                                      | 4 | 0.047256716 | 4.915816768 |
| GO:0048585~negative regulation of response to stimulus                                      | 4 | 0.047256716 | 4.915816768 |
| GO:0046641~positive regulation of alpha-beta T cell proliferation                           | 3 | 0.006493239 | 23.96460674 |
| GO:0002863~positive regulation of inflammatory response to antigenic stimulus               | 3 | 0.010982563 | 18.43431288 |
| GO:0007159~leukocyte adhesion                                                               | 3 | 0.012708992 | 17.11757624 |
| GO:0002714~positive regulation of B cell mediated immunity                                  | 3 | 0.012708992 | 17.11757624 |
| GO:0002891~positive regulation of immunoglobulin mediated immune response                   | 3 | 0.012708992 | 17.11757624 |
| GO:0046640~regulation of alpha-beta T cell proliferation                                    | 3 | 0.012708992 | 17.11757624 |

|                                                                          |   |             |             |
|--------------------------------------------------------------------------|---|-------------|-------------|
| GO:0002886~regulation of myeloid leukocyte mediated immunity             | 3 | 0.014545318 | 15.97640449 |
| GO:0009067~aspartate family amino acid biosynthetic process              | 3 | 0.01648857  | 14.97787921 |
| GO:0045577~regulation of B cell differentiation                          | 3 | 0.01648857  | 14.97787921 |
| GO:0002861~regulation of inflammatory response to antigenic stimulus     | 3 | 0.020684244 | 13.31367041 |
| GO:0048535~lymph node development                                        | 3 | 0.022931001 | 12.61295092 |
| GO:0051053~negative regulation of DNA metabolic process                  | 3 | 0.025273351 | 11.98230337 |
| GO:0009066~aspartate family amino acid metabolic process                 | 3 | 0.030234083 | 10.89300306 |
| GO:0000018~regulation of DNA recombination                               | 3 | 0.035545458 | 9.985252809 |
| GO:0050729~positive regulation of inflammatory response                  | 3 | 0.035545458 | 9.985252809 |
| GO:0002637~regulation of immunoglobulin production                       | 3 | 0.0383263   | 9.585842697 |
| GO:0046635~positive regulation of alpha-beta T cell activation           | 3 | 0.041187296 | 9.217156439 |
| GO:0042098~T cell proliferation                                          | 3 | 0.047140192 | 8.558788122 |
| GO:0051307~meiotic chromosome separation                                 | 2 | 0.036884021 | 53.25468165 |
| GO:0051304~chromosome separation                                         | 2 | 0.036884021 | 53.25468165 |
| GO:0032413~negative regulation of ion transmembrane transporter activity | 2 | 0.048875547 | 39.94101124 |
| GO:0032410~negative regulation of transporter activity                   | 2 | 0.048875547 | 39.94101124 |

**Supplementary Table S15** qRT-PCR measurement of mRNA levels of stress genes in

the brain and liver of mice following 3 hours of heat shock at 39.5°C.

| Gene           | Brain        |          | Liver        |          | Gene                        | Brain        |          | Liver        |          |
|----------------|--------------|----------|--------------|----------|-----------------------------|--------------|----------|--------------|----------|
|                | Fold change* | p-value  | Fold change* | p-value  |                             | Fold change* | p-value  | Fold change* | p-value  |
| <i>Dnajc21</i> | 0.5539       | 0.103303 | 0.6619       | 0.01114  | <i>Dnajc5</i>               | 1.1447       | 0.283714 | 0.5081       | 0.014792 |
| <i>Atf6</i>    | 1.6647       | 0.005168 | 0.6862       | 0.226613 | <i>Dnajc5b</i>              | 0.7204       | 0.388559 | 0.8587       | 0.44971  |
| <i>Bag1</i>    | 0.8096       | 0.073824 | 1.056        | 0.825353 | <i>Dnajc5g</i>              | 0.5655       | 0.379182 | 0.8058       | 0.445654 |
| <i>Bag2</i>    | 0.6678       | 0.098269 | 0.3263       | 0.008426 | <i>Dnajc6</i>               | 0.967        | 0.607897 | 0.1212       | 0.025154 |
| <i>Bag3</i>    | 1.2282       | 0.69129  | 12.4831      | 0.001895 | <i>Dnajc7</i>               | 1.294        | 0.026786 | 0.7721       | 0.184159 |
| <i>Bag4</i>    | 0.7621       | 0.177136 | 0.4633       | 0.010735 | <i>Dnajc8</i>               | 0.4721       | 0.033914 | 0.5724       | 0.41244  |
| <i>Bag5</i>    | 0.9877       | 0.933817 | 0.3471       | 0.002917 | <i>Dnajc9</i>               | 0.6716       | 0.097667 | 0.3377       | 0.145668 |
| <i>Cabcl</i>   | 0.9734       | 0.799302 | 1.9504       | 0.053862 | <i>Hsf1</i>                 | 0.6871       | 0.09983  | 0.4489       | 0.002501 |
| <i>Ccs</i>     | 1.0806       | 0.855899 | 1.8411       | 0.070995 | <i>Hsf2</i>                 | 0.924        | 0.514831 | 1.481        | 0.214062 |
| <i>Cct2</i>    | 1.3147       | 0.151575 | 0.8364       | 0.516403 | <i>Hsf4</i>                 | 0.701        | 0.260822 | 0.5157       | 0.077468 |
| <i>Cct3</i>    | 0.9056       | 0.328878 | 0.8311       | 0.102503 | <i>Hsph1</i>                | 1.2425       | 0.213459 | 2.6855       | 0.000429 |
| <i>Cct4</i>    | 1.344        | 0.133211 | 1.0124       | 0.868098 | <i>Hsp90aal</i>             | 0.9517       | 0.654922 | 1.2593       | 0.732777 |
| <i>Cct5</i>    | 1.1644       | 0.031368 | 1.1865       | 0.126963 | <i>Hsp90abl</i>             | 1.1284       | 0.031751 | 1.0249       | 0.986762 |
| <i>Cct6a</i>   | 1.1063       | 0.367545 | 0.8571       | 0.116482 | <i>Hsp90b1</i>              | 0.8877       | 0.325235 | 1.0267       | 0.755551 |
| <i>Cct6b</i>   | 0.5358       | 0.394047 | 0.5841       | 0.325782 | <i>Hspa14</i>               | 0.827        | 0.376506 | 0.5518       | 0.043781 |
| <i>Cct7</i>    | 1.005        | 0.843311 | 0.723        | 0.049662 | <i>Hspa1a</i>               | 19.8949      | 0.000918 | 504.2773     | 0.000067 |
| <i>Cryaa</i>   | 0.7794       | 0.396386 | 0.8414       | 0.448701 | <i>Hspa1b</i>               | 18.4604      | 0.000675 | 232.0417     | 0.000392 |
| <i>Cryab</i>   | 0.6529       | 0.13472  | 0.9309       | 0.514309 | <i>Hspa11</i>               | 0.7101       | 0.109201 | 1.7557       | 0.032631 |
| <i>Dnaja1</i>  | 1.4577       | 0.001304 | 1.6457       | 0.104811 | <i>Hspa2</i>                | 1.9834       | 0.03778  | 1.2014       | 0.718687 |
| <i>Dnaja2</i>  | 0.8556       | 0.220376 | 0.4867       | 0.052802 | <i>Hspa4</i>                | 1.2709       | 0.057047 | 0.4114       | 0.028217 |
| <i>Dnaja3</i>  | 0.7889       | 0.053368 | 0.4787       | 0.130644 | <i>Hspa4l</i>               | 0.4652       | 0.063573 | 0.8071       | 0.385973 |
| <i>Dnaja4</i>  | 1.8024       | 0.005696 | 1.3622       | 0.394316 | <i>Hspa5</i>                | 1.0546       | 0.813525 | 1.4061       | 0.086402 |
| <i>Dnajb1</i>  | 2.7974       | 0.003117 | 9.8775       | 0.000192 | <i>Hspa8</i>                | 1.5838       | 0.00096  | 2.3528       | 0.000481 |
| <i>Dnajb2</i>  | 0.6692       | 0.023008 | 0.8844       | 0.465361 | <i>Hspa9</i>                | 0.832        | 0.654396 | 0.7577       | 0.261593 |
| <i>Dnajb11</i> | 0.2557       | 0.339799 | 0.1911       | 0.127867 | <i>Hspb1</i>                | 2.3665       | 0.003963 | 3.8697       | 0.001453 |
| <i>Dnajb12</i> | 0.9954       | 0.900606 | 0.7651       | 0.162726 | <i>Hspb2</i>                | 1.1072       | 0.70863  | 0.4993       | 0.330753 |
| <i>Dnajb13</i> | 0.7095       | 0.428443 | 0.9409       | 0.473346 | <i>Hspb3</i>                | 1.2617       | 0.722348 | 0.4965       | 0.373041 |
| <i>Dnajb14</i> | 0.7177       | 0.071358 | 0.4677       | 0.028752 | <i>Hspb6</i>                | 0.7388       | 0.265384 | 0.5696       | 0.130521 |
| <i>Dnajb5</i>  | 3.126        | 0.006149 | 0.2583       | 0.061209 | <i>Hspb7</i>                | 0.7674       | 0.212276 | 0.6188       | 0.364641 |
| <i>Dnajb6</i>  | 0.9888       | 0.850383 | 0.6414       | 0.007803 | <i>Hspb8</i>                | 0.546        | 0.168098 | 1.9018       | 0.04364  |
| <i>Dnajb7</i>  | 0.6096       | 0.42118  | 2.3162       | 0.067284 | <i>Hspd1</i>                | 1.285        | 0.004456 | 1.7756       | 0.029237 |
| <i>Dnajb8</i>  | 0.5007       | 0.377314 | 0.8587       | 0.44971  | <i>Hspe1</i>                | 1.1327       | 0.213775 | 1.4252       | 0.249831 |
| <i>Dnajb9</i>  | 0.6582       | 0.00112  | 1.3041       | 0.458707 | <i>Pfdn1</i>                | 0.9881       | 0.870701 | 1.2651       | 0.259957 |
| <i>Dnajc1</i>  | 1.4859       | 0.005896 | 0.7579       | 0.235999 | <i>Pfdn2</i>                | 0.7737       | 0.063529 | 0.9846       | 0.870173 |
| <i>Dnajc10</i> | 0.9356       | 0.361546 | 0.3696       | 0.002008 | <i>Serpinh1</i>             | 1.4643       | 0.182529 | 0.63         | 0.493928 |
| <i>Dnajc11</i> | 0.9057       | 0.477053 | 0.7642       | 0.245459 | <i>Sil1</i>                 | 1.2234       | 0.342094 | 1.7865       | 0.015409 |
| <i>Dnajc12</i> | 0.4137       | 0.021857 | 0.8988       | 0.572277 | <i>Tcp1</i>                 | 1.3309       | 0.018088 | 1.0342       | 0.721104 |
| <i>Dnajc13</i> | 0.8298       | 0.177084 | 0.422        | 0.004247 | <i>Tor1a</i>                | 1.2889       | 0.019206 | 0.9866       | 0.968326 |
| <i>Dnajc14</i> | 1.0748       | 0.374884 | 0.5152       | 0.001132 | <i>Gusb<sup>§</sup></i>     | 0.5093       | 0.006591 | 0.8001       | 0.270133 |
| <i>Dnajc15</i> | 0.7344       | 0.144963 | 1.4294       | 0.246661 | <i>Hprt1<sup>§</sup></i>    | 0.955        | 0.343731 | 1.0434       | 0.661078 |
| <i>Dnajc16</i> | 0.7201       | 0.053174 | 0.5555       | 0.090918 | <i>Hsp90abl<sup>§</sup></i> | 1.1395       | 0.020618 | 1.0932       | 0.688567 |
| <i>Dnajc17</i> | 1.1979       | 0.177347 | 0.8909       | 0.519996 | <i>Gapdh<sup>§</sup></i>    | 1.1904       | 0.007638 | 1.417        | 0.083667 |
| <i>Dnajc18</i> | 0.8688       | 0.336257 | 0.4949       | 0.0002   | <i>Actb<sup>§</sup></i>     | 1.5157       | 0.004774 | 0.7732       | 0.352965 |
| <i>Dnajc19</i> | 0.8057       | 0.117401 | 1.0616       | 0.917233 |                             |              |          |              |          |
| <i>Dnajc3</i>  | 0.711        | 0.103528 | 0.8585       | 0.574645 |                             |              |          |              |          |
| <i>Dnajc4</i>  | 0.6764       | 0.184894 | 1.273        | 0.016873 |                             |              |          |              |          |
| <i>Dnajc5</i>  | 1.1447       | 0.283714 | 0.5081       | 0.014792 |                             |              |          |              |          |
| <i>Dnajc5b</i> | 0.7204       | 0.388559 | 0.8587       | 0.44971  |                             |              |          |              |          |

Key: \* Fold change of *Smarcal1<sup>del/del</sup>* relative to *wt*; <sup>§</sup> control genes; blue shading, genes that have significantly different expression just in the brain of *Smarcal1<sup>del/del</sup>* compared to *wt*; pink shading, genes that have significantly different expression just in the liver of *Smarcal1<sup>del/del</sup>* compared to *wt*

**Supplementary Table S16** Enrichment in biological process GO-terms (all levels) of differentially expressed genes (q<0.05) between *RpII215<sup>d</sup>/FM7;Marcal1<sup>del/del</sup>* and *yw* fly ovaries.

| Term                                                                             | Count | PValue      | Fold Enrichment |
|----------------------------------------------------------------------------------|-------|-------------|-----------------|
| GO:0009987~cellular process                                                      | 350   | 7.11E-08    | 1.182962437     |
| GO:0008152~metabolic process                                                     | 300   | 2.90E-05    | 1.168941048     |
| GO:0044238~primary metabolic process                                             | 250   | 8.69E-05    | 1.195140191     |
| GO:0044237~cellular metabolic process                                            | 223   | 2.26E-05    | 1.242854726     |
| GO:0043170~macromolecule metabolic process                                       | 191   | 0.027556497 | 1.121973063     |
| GO:0065007~biological regulation                                                 | 171   | 0.012492805 | 1.158556378     |
| GO:0044260~cellular macromolecule metabolic process                              | 169   | 1.09E-04    | 1.281200439     |
| GO:0050789~regulation of biological process                                      | 160   | 0.005729838 | 1.191211236     |
| GO:0050794~regulation of cellular process                                        | 148   | 0.010568064 | 1.184387145     |
| GO:0016043~cellular component organization                                       | 140   | 4.61E-06    | 1.413131599     |
| GO:0051179~localization                                                          | 118   | 0.009257764 | 1.225732441     |
| GO:0006807~nitrogen compound metabolic process                                   | 115   | 8.13E-04    | 1.320637602     |
| GO:0034641~cellular nitrogen compound metabolic process                          | 111   | 5.10E-05    | 1.425098921     |
| GO:0051234~establishment of localization                                         | 102   | 0.00849426  | 1.256228433     |
| GO:0006139~nucleobase, nucleoside, nucleotide and nucleic acid metabolic process | 99    | 2.04E-04    | 1.41339         |
| GO:0006810~transport                                                             | 97    | 0.016600255 | 1.234697456     |
| GO:0006996~organelle organization                                                | 81    | 1.39E-04    | 1.502611746     |
| GO:0043412~biopolymer modification                                               | 61    | 4.57E-04    | 1.557361707     |
| GO:0006464~protein modification process                                          | 58    | 5.60E-04    | 1.568270202     |
| GO:0033036~macromolecule localization                                            | 53    | 1.71E-05    | 1.843721572     |
| GO:0007049~cell cycle                                                            | 52    | 0.002722216 | 1.50646645      |
| GO:0044085~cellular component biogenesis                                         | 49    | 0.006815028 | 1.459842794     |
| GO:0043687~post-translational protein modification                               | 48    | 9.74E-04    | 1.616226415     |
| GO:0051641~cellular localization                                                 | 47    | 0.001688624 | 1.585546629     |
| GO:0016070~RNA metabolic process                                                 | 47    | 0.002271936 | 1.561925822     |
| GO:0065008~regulation of biological quality                                      | 47    | 0.013660778 | 1.414425239     |
| GO:0009056~catabolic process                                                     | 46    | 7.73E-04    | 1.658400673     |

|                                                           |    |             |             |
|-----------------------------------------------------------|----|-------------|-------------|
| GO:0048519~negative regulation of biological process      | 46 | 0.02861235  | 1.359119757 |
| GO:0022402~cell cycle process                             | 45 | 0.008840369 | 1.468121572 |
| GO:0008104~protein localization                           | 43 | 3.21E-05    | 1.957578656 |
| GO:0006796~phosphate metabolic process                    | 43 | 0.024241749 | 1.392687538 |
| GO:0006793~phosphorus metabolic process                   | 43 | 0.024241749 | 1.392687538 |
| GO:0007010~cytoskeleton organization                      | 42 | 0.002320114 | 1.61188172  |
| GO:0022607~cellular component assembly                    | 42 | 0.025399639 | 1.393169145 |
| GO:0022403~cell cycle phase                               | 41 | 0.011826147 | 1.47515961  |
| GO:0048523~negative regulation of cellular process        | 41 | 0.03795045  | 1.359998451 |
| GO:0051649~establishment of localization in cell          | 40 | 0.002594879 | 1.626044039 |
| GO:0048699~generation of neurons                          | 40 | 0.010288425 | 1.49650594  |
| GO:0000279~M phase                                        | 40 | 0.010691232 | 1.493375174 |
| GO:0006950~response to stress                             | 40 | 0.011361063 | 1.487152778 |
| GO:0022008~neurogenesis                                   | 40 | 0.020110822 | 1.430527722 |
| GO:0007017~microtubule-based process                      | 38 | 0.002135805 | 1.670299672 |
| GO:0000902~cell morphogenesis                             | 36 | 0.022882898 | 1.453506787 |
| GO:0044248~cellular catabolic process                     | 35 | 0.002475963 | 1.70191871  |
| GO:0000278~mitotic cell cycle                             | 34 | 0.00307323  | 1.69485568  |
| GO:0050793~regulation of developmental process            | 33 | 6.51E-04    | 1.881509585 |
| GO:0000226~microtubule cytoskeleton organization          | 32 | 5.86E-04    | 1.916331096 |
| GO:0046907~intracellular transport                        | 32 | 0.001329529 | 1.824494143 |
| GO:0016192~vesicle-mediated transport                     | 32 | 0.030243692 | 1.460528559 |
| GO:0051716~cellular response to stimulus                  | 31 | 2.35E-04    | 2.048966049 |
| GO:0051128~regulation of cellular component organization  | 31 | 3.88E-04    | 1.990002998 |
| GO:0048518~positive regulation of biological process      | 31 | 0.01176345  | 1.589715038 |
| GO:0030030~cell projection organization                   | 31 | 0.021537837 | 1.515673516 |
| GO:0051276~chromosome organization                        | 29 | 0.002171798 | 1.835209811 |
| GO:0051239~regulation of multicellular organismal process | 29 | 0.002398442 | 1.822285798 |
| GO:0045184~establishment of protein localization          | 29 | 0.002512304 | 1.815891813 |
| GO:0006629~lipid metabolic process                        | 29 | 0.003934782 | 1.760303288 |
| GO:0006396~RNA processing                                 | 29 | 0.008777374 | 1.658747329 |

|                                                                  |    |             |             |
|------------------------------------------------------------------|----|-------------|-------------|
| GO:0006259~DNA metabolic process                                 | 28 | 9.92E-05    | 2.261010558 |
| GO:0009057~macromolecule catabolic process                       | 28 | 0.003317298 | 1.803910951 |
| GO:0015031~protein transport                                     | 27 | 0.006769389 | 1.733228417 |
| GO:0048858~cell projection morphogenesis                         | 27 | 0.035267791 | 1.505742188 |
| GO:0032990~cell part morphogenesis                               | 27 | 0.049511237 | 1.455702417 |
| GO:0048667~cell morphogenesis involved in neuron differentiation | 26 | 0.018881001 | 1.611082176 |
| GO:0009966~regulation of signal transduction                     | 26 | 0.023674724 | 1.578202948 |
| GO:0000904~cell morphogenesis involved in differentiation        | 26 | 0.033093738 | 1.531325633 |
| GO:0048522~positive regulation of cellular process               | 26 | 0.042167891 | 1.49193462  |
| GO:0010646~regulation of cell communication                      | 26 | 0.042167891 | 1.49193462  |
| GO:0043933~macromolecular complex subunit organization           | 25 | 0.025116097 | 1.587707592 |
| GO:0048812~neuron projection morphogenesis                       | 25 | 0.030173439 | 1.559950466 |
| GO:0031175~neuron projection development                         | 25 | 0.030993553 | 1.554515099 |
| GO:0045595~regulation of cell differentiation                    | 24 | 2.49E-04    | 2.315135135 |
| GO:0007051~spindle organization                                  | 24 | 0.003623308 | 1.903555556 |
| GO:0010324~membrane invagination                                 | 23 | 0.031610381 | 1.590907623 |
| GO:0006897~endocytosis                                           | 23 | 0.031610381 | 1.590907623 |
| GO:0016071~mRNA metabolic process                                | 22 | 0.010804123 | 1.792732116 |
| GO:0044265~cellular macromolecule catabolic process              | 22 | 0.014372148 | 1.744925926 |
| GO:0009605~response to external stimulus                         | 21 | 0.00621043  | 1.921858974 |
| GO:0030163~protein catabolic process                             | 21 | 0.00817114  | 1.8738125   |
| GO:0033554~cellular response to stress                           | 20 | 0.004358407 | 2.027935606 |
| GO:0006397~mRNA processing                                       | 20 | 0.012084936 | 1.839776632 |
| GO:0006909~phagocytosis                                          | 20 | 0.014066487 | 1.811759729 |
| GO:0051726~regulation of cell cycle                              | 19 | 0.005198615 | 2.042595382 |
| GO:0044255~cellular lipid metabolic process                      | 19 | 0.013769279 | 1.852846084 |
| GO:0006911~phagocytosis, engulfment                              | 19 | 0.016878101 | 1.813213012 |
| GO:0007052~mitotic spindle organization                          | 19 | 0.023601968 | 1.747787801 |
| GO:0007409~axonogenesis                                          | 19 | 0.028265593 | 1.712478956 |
| GO:0034621~cellular macromolecular complex subunit organization  | 19 | 0.035028892 | 1.670299672 |
| GO:0007059~chromosome segregation                                | 18 | 2.53E-04    | 2.745512821 |



|                                                                                                 |    |             |             |
|-------------------------------------------------------------------------------------------------|----|-------------|-------------|
| GO:0042592~homeostatic process                                                                  | 18 | 0.009510974 | 1.970705521 |
| GO:0044257~cellular protein catabolic process                                                   | 18 | 0.027037229 | 1.755327869 |
| GO:0051603~proteolysis involved in cellular protein catabolic process                           | 18 | 0.027037229 | 1.755327869 |
| GO:0032879~regulation of localization                                                           | 17 | 1.08E-04    | 3.064436027 |
| GO:0016311~dephosphorylation                                                                    | 17 | 3.40E-04    | 2.783295107 |
| GO:0019941~modification-dependent protein catabolic process                                     | 17 | 0.026868496 | 1.795142998 |
| GO:0043632~modification-dependent macromolecule catabolic process                               | 17 | 0.028195026 | 1.784583333 |
| GO:0060284~regulation of cell development                                                       | 16 | 0.006283738 | 2.179643766 |
| GO:0022603~regulation of anatomical structure morphogenesis                                     | 16 | 0.033909195 | 1.784583333 |
| GO:0007067~mitosis                                                                              | 15 | 0.033572894 | 1.833476027 |
| GO:0000087~M phase of mitotic cell cycle                                                        | 15 | 0.037073808 | 1.808699324 |
| GO:0000280~nuclear division                                                                     | 15 | 0.037073808 | 1.808699324 |
| GO:0048285~organelle fission                                                                    | 15 | 0.046957866 | 1.749591503 |
| GO:0006470~protein amino acid dephosphorylation                                                 | 14 | 5.70E-04    | 3.046849593 |
| GO:0019725~cellular homeostasis                                                                 | 14 | 0.008806922 | 2.250825826 |
| GO:0006974~response to DNA damage stimulus                                                      | 14 | 0.011710995 | 2.172536232 |
| GO:0009968~negative regulation of signal transduction                                           | 13 | 0.011212454 | 2.274468954 |
| GO:0006281~DNA repair                                                                           | 13 | 0.011212454 | 2.274468954 |
| GO:0010648~negative regulation of cell communication                                            | 13 | 0.012070809 | 2.252386731 |
| GO:0033043~regulation of organelle organization                                                 | 13 | 0.018324001 | 2.128402141 |
| GO:0022604~regulation of cell morphogenesis                                                     | 13 | 0.03372718  | 1.949544818 |
| GO:0006403~RNA localization                                                                     | 13 | 0.04651578  | 1.855966667 |
| GO:0000398~nuclear mRNA splicing, via spliceosome                                               | 13 | 0.048932949 | 1.841236772 |
| GO:0000377~RNA splicing, via transesterification reactions with bulged adenosine as nucleophile | 13 | 0.048932949 | 1.841236772 |
| GO:0006260~DNA replication                                                                      | 12 | 0.01781505  | 2.230729167 |
| GO:0007346~regulation of mitotic cell cycle                                                     | 12 | 0.020496925 | 2.185204082 |
| GO:0007264~small GTPase mediated signal transduction                                            | 12 | 0.040774274 | 1.964678899 |
| GO:0045454~cell redox homeostasis                                                               | 11 | 6.03E-04    | 3.703852201 |
| GO:0060341~regulation of cellular localization                                                  | 11 | 0.004245002 | 2.88682598  |
| GO:0044087~regulation of cellular component biogenesis                                          | 11 | 0.013258339 | 2.453802083 |
| GO:0019637~organophosphate metabolic process                                                    | 11 | 0.043964131 | 2.023754296 |

|                                                                          |    |             |             |
|--------------------------------------------------------------------------|----|-------------|-------------|
| GO:0051049~regulation of transport                                       | 10 | 0.002427666 | 3.367138365 |
| GO:0006261~DNA-dependent DNA replication                                 | 10 | 0.004043948 | 3.130847953 |
| GO:0046486~glycerolipid metabolic process                                | 10 | 0.005731113 | 2.974305556 |
| GO:0006644~phospholipid metabolic process                                | 10 | 0.044237619 | 2.124503968 |
| GO:0045132~meiotic chromosome segregation                                | 9  | 0.01329798  | 2.817763158 |
| GO:0050657~nucleic acid transport                                        | 9  | 0.02332665  | 2.549404762 |
| GO:0050658~RNA transport                                                 | 9  | 0.02332665  | 2.549404762 |
| GO:0051236~establishment of RNA localization                             | 9  | 0.025406222 | 2.509570312 |
| GO:0050767~regulation of neurogenesis                                    | 9  | 0.032413809 | 2.397201493 |
| GO:0002164~larval development                                            | 9  | 0.035016101 | 2.361948529 |
| GO:0015931~nucleobase, nucleoside, nucleotide and nucleic acid transport | 9  | 0.035016101 | 2.361948529 |
| GO:0051169~nuclear transport                                             | 9  | 0.046827578 | 2.230729167 |
| GO:0006913~nucleocytoplasmic transport                                   | 9  | 0.046827578 | 2.230729167 |
| GO:0031023~microtubule organizing center organization                    | 8  | 0.014725806 | 3.037588652 |
| GO:0002168~instar larval development                                     | 8  | 0.01643681  | 2.974305556 |
| GO:0045995~regulation of embryonic development                           | 8  | 0.029728228 | 2.64382716  |
| GO:0006650~glycerophospholipid metabolic process                         | 8  | 0.029728228 | 2.64382716  |
| GO:0032880~regulation of protein localization                            | 7  | 0.017794576 | 3.287390351 |
| GO:0048193~Golgi vesicle transport                                       | 7  | 0.031122715 | 2.905135659 |
| GO:0051297~centrosome organization                                       | 7  | 0.031122715 | 2.905135659 |
| GO:0010627~regulation of protein kinase cascade                          | 7  | 0.034401593 | 2.839109848 |
| GO:0007127~meiosis I                                                     | 7  | 0.037895519 | 2.776018519 |
| GO:0000070~mitotic sister chromatid segregation                          | 7  | 0.041607995 | 2.71567029  |
| GO:0000819~sister chromatid segregation                                  | 7  | 0.045541974 | 2.657890071 |
| GO:0048585~negative regulation of response to stimulus                   | 6  | 0.006380093 | 4.867045455 |
| GO:0051050~positive regulation of transport                              | 6  | 0.013259737 | 4.118269231 |
| GO:0022411~cellular component disassembly                                | 6  | 0.018078793 | 3.824107143 |
| GO:0010769~regulation of cell morphogenesis involved in differentiation  | 6  | 0.023929637 | 3.569166667 |
| GO:0010975~regulation of neuron projection development                   | 6  | 0.023929637 | 3.569166667 |
| GO:0030261~chromosome condensation                                       | 6  | 0.023929637 | 3.569166667 |
| GO:0046822~regulation of nucleocytoplasmic transport                     | 6  | 0.034779589 | 3.24469697  |

|                                                                 |   |             |             |
|-----------------------------------------------------------------|---|-------------|-------------|
| GO:0032386~regulation of intracellular transport                | 6 | 0.038972833 | 3.149264706 |
| GO:0006270~DNA replication initiation                           | 5 | 0.008043526 | 5.948611111 |
| GO:0010741~negative regulation of protein kinase cascade        | 5 | 0.015787154 | 4.957175926 |
| GO:0050770~regulation of axonogenesis                           | 5 | 0.015787154 | 4.957175926 |
| GO:0007426~tracheal outgrowth, open tracheal system             | 5 | 0.027058084 | 4.249007937 |
| GO:0043269~regulation of ion transport                          | 4 | 0.003060597 | 11.89722222 |
| GO:0032508~DNA duplex unwinding                                 | 4 | 0.00787683  | 8.922916667 |
| GO:0032392~DNA geometric change                                 | 4 | 0.00787683  | 8.922916667 |
| GO:0035099~hemocyte migration                                   | 4 | 0.039881238 | 5.098809524 |
| GO:0043624~cellular protein complex disassembly                 | 4 | 0.039881238 | 5.098809524 |
| GO:0043241~protein complex disassembly                          | 4 | 0.039881238 | 5.098809524 |
| GO:0033044~regulation of chromosome organization                | 4 | 0.047840666 | 4.758888889 |
| GO:0034765~regulation of ion transmembrane transport            | 3 | 0.017362884 | 13.384375   |
| GO:0034762~regulation of transmembrane transport                | 3 | 0.017362884 | 13.384375   |
| GO:0032412~regulation of ion transmembrane transporter activity | 3 | 0.017362884 | 13.384375   |
| GO:0051924~regulation of calcium ion transport                  | 3 | 0.017362884 | 13.384375   |
| GO:0032409~regulation of transporter activity                   | 3 | 0.017362884 | 13.384375   |
| GO:0022898~regulation of transmembrane transporter activity     | 3 | 0.017362884 | 13.384375   |
| GO:0010959~regulation of metal ion transport                    | 3 | 0.027873818 | 10.7075     |
| GO:0032837~distributive segregation                             | 3 | 0.027873818 | 10.7075     |
| GO:0006268~DNA unwinding during replication                     | 3 | 0.040280429 | 8.922916667 |
| GO:0006415~translational termination                            | 3 | 0.040280429 | 8.922916667 |

**Supplementary Table S17** Enrichment in biological process GO-terms (all levels) of differentially expressed genes (q<0.05) between *RpII215<sup>d</sup>/FM7* and *yw* fly ovaries.

| <b>Term</b>                                                                     | <b>Count</b> | <b>PValue</b> | <b>Fold Enrichment</b> |
|---------------------------------------------------------------------------------|--------------|---------------|------------------------|
| GO:0009987~cellular process                                                     | 181          | 1.57E-04      | 1.179297493            |
| GO:0008152~metabolic process                                                    | 161          | 2.29E-04      | 1.209314112            |
| GO:0044238~primary metabolic process                                            | 125          | 0.022834886   | 1.151942353            |
| GO:0044237~cellular metabolic process                                           | 124          | 4.59E-05      | 1.332229605            |
| GO:0044260~cellular macromolecule metabolic process                             | 89           | 0.003132667   | 1.300655468            |
| GO:0050789~regulation of biological process                                     | 84           | 0.031554616   | 1.205563179            |
| GO:0016043~cellular component organization                                      | 66           | 0.019002973   | 1.284222864            |
| GO:0006807~nitrogen compound metabolic process                                  | 57           | 0.042133297   | 1.261834985            |
| GO:0034641~cellular nitrogen compound metabolic process                         | 55           | 0.012305381   | 1.361214643            |
| GO:0010467~gene expression                                                      | 51           | 0.019970999   | 1.346494189            |
| GO:0006139~nucleobase, nucleoside, nucleotide and nucleic acid metabolic proces | 50           | 0.014752062   | 1.376064257            |
| GO:0043412~biopolymer modification                                              | 31           | 0.018527719   | 1.525679255            |
| GO:0048519~negative regulation of biological process                            | 28           | 0.015566646   | 1.594776457            |
| GO:0007389~pattern specification process                                        | 27           | 0.001468989   | 1.935090361            |
| GO:0033036~macromolecule localization                                           | 27           | 0.003662632   | 1.810610865            |
| GO:0044085~cellular component biogenesis                                        | 27           | 0.024350343   | 1.550656717            |
| GO:0003002~regionalization                                                      | 26           | 0.00144818    | 1.970136051            |
| GO:0016070~RNA metabolic process                                                | 26           | 0.012464648   | 1.665627127            |
| GO:0006796~phosphate metabolic process                                          | 26           | 0.016586938   | 1.623306292            |
| GO:0006793~phosphorus metabolic process                                         | 26           | 0.016586938   | 1.623306292            |
| GO:0048523~negative regulation of cellular process                              | 24           | 0.038173228   | 1.534644153            |
| GO:0008104~protein localization                                                 | 22           | 0.00482586    | 1.930702401            |
| GO:0007444~imaginal disc development                                            | 21           | 0.01614927    | 1.753479939            |
| GO:0016310~phosphorylation                                                      | 21           | 0.021749883   | 1.699844082            |
| GO:0006396~RNA processing                                                       | 20           | 0.001736517   | 2.205231181            |
| GO:0035220~wing disc development                                                | 18           | 0.003229869   | 2.203661622            |
| GO:0048736~appendage development                                                | 15           | 0.012058473   | 2.097658928            |

|                                                                          |    |             |             |
|--------------------------------------------------------------------------|----|-------------|-------------|
| GO:0007560~imaginal disc morphogenesis                                   | 15 | 0.036210253 | 1.816986255 |
| GO:0048563~post-embryonic organ morphogenesis                            | 15 | 0.036210253 | 1.816986255 |
| GO:0048569~post-embryonic organ development                              | 15 | 0.049294478 | 1.73745487  |
| GO:0002009~morphogenesis of an epithelium                                | 14 | 0.01361855  | 2.1405444   |
| GO:0060429~epithelium development                                        | 14 | 0.018897383 | 2.049457404 |
| GO:0035107~appendage morphogenesis                                       | 14 | 0.023418194 | 1.990175578 |
| GO:0048737~imaginal disc-derived appendage development                   | 14 | 0.024129689 | 1.981985555 |
| GO:0048729~tissue morphogenesis                                          | 14 | 0.027116667 | 1.949888623 |
| GO:0045595~regulation of cell differentiation                            | 13 | 0.007439984 | 2.417410181 |
| GO:0007476~imaginal disc-derived wing morphogenesis                      | 13 | 0.024419573 | 2.051471943 |
| GO:0007472~wing disc morphogenesis                                       | 13 | 0.026027967 | 2.032822198 |
| GO:0035120~post-embryonic appendage morphogenesis                        | 13 | 0.033956683 | 1.952929622 |
| GO:0035114~imaginal disc-derived appendage morphogenesis                 | 13 | 0.044715196 | 1.871217086 |
| GO:0034621~cellular macromolecular complex subunit organization          | 12 | 0.033607907 | 2.033592498 |
| GO:0007167~enzyme linked receptor protein signaling pathway              | 11 | 0.009320195 | 2.609777039 |
| GO:0009891~positive regulation of biosynthetic process                   | 10 | 0.033453144 | 2.248471008 |
| GO:0031328~positive regulation of cellular biosynthetic process          | 10 | 0.033453144 | 2.248471008 |
| GO:0031325~positive regulation of cellular metabolic process             | 10 | 0.047008098 | 2.110528002 |
| GO:0022613~ribonucleoprotein complex biogenesis                          | 9  | 0.00574828  | 3.293770828 |
| GO:0016331~morphogenesis of embryonic epithelium                         | 9  | 0.022953709 | 2.580120482 |
| GO:0006403~RNA localization                                              | 9  | 0.028449931 | 2.476915663 |
| GO:0006730~one-carbon metabolic process                                  | 8  | 0.006261493 | 3.621221729 |
| GO:0009968~negative regulation of signal transduction                    | 8  | 0.028229202 | 2.69816521  |
| GO:0010648~negative regulation of cell communication                     | 8  | 0.029569966 | 2.671969431 |
| GO:0032259~methylation                                                   | 7  | 0.004072624 | 4.543608396 |
| GO:0015931~nucleobase, nucleoside, nucleotide and nucleic acid transport | 7  | 0.013572868 | 3.541341838 |
| GO:0043414~biopolymer methylation                                        | 6  | 0.007662472 | 4.800224152 |
| GO:0017145~stem cell division                                            | 6  | 0.015523668 | 4.047247815 |
| GO:0008356~asymmetric cell division                                      | 6  | 0.02575562  | 3.558786872 |
| GO:0050657~nucleic acid transport                                        | 6  | 0.035215408 | 3.276343469 |
| GO:0050658~RNA transport                                                 | 6  | 0.035215408 | 3.276343469 |

|                                                                       |   |             |             |
|-----------------------------------------------------------------------|---|-------------|-------------|
| GO:0051236~establishment of RNA localization                          | 6 | 0.037333192 | 3.225150602 |
| GO:0042254~ribosome biogenesis                                        | 6 | 0.037333192 | 3.225150602 |
| GO:0035222~wing disc pattern formation                                | 6 | 0.04657453  | 3.035435861 |
| GO:0007173~epidermal growth factor receptor signaling pathway         | 5 | 0.019532476 | 4.778000892 |
| GO:0006364~rRNA processing                                            | 5 | 0.027717191 | 4.300200803 |
| GO:0016072~rRNA metabolic process                                     | 5 | 0.030037905 | 4.195317857 |
| GO:0006446~regulation of translational initiation                     | 4 | 0.014180198 | 7.644801428 |
| GO:0007179~transforming growth factor beta receptor signaling pathway | 4 | 0.027686318 | 5.982888074 |
| GO:0033227~dsRNA transport                                            | 4 | 0.034474406 | 5.504257028 |
| GO:0008213~protein amino acid alkylation                              | 4 | 0.046111135 | 4.914515204 |
| GO:0006479~protein amino acid methylation                             | 4 | 0.046111135 | 4.914515204 |
| GO:0022411~cellular component disassembly                             | 4 | 0.046111135 | 4.914515204 |
| GO:0048096~chromatin-mediated maintenance of transcription            | 3 | 0.032228518 | 10.32048193 |
| GO:0045815~positive regulation of gene expression, epigenetic         | 3 | 0.038650506 | 9.382256298 |

**Supplementary Table S18** Antibodies used for flowcytometry.

| <b>Antigen</b> | <b>Species specificity</b> | <b>Clone</b> | <b>Conjugation</b> |
|----------------|----------------------------|--------------|--------------------|
| TCR $\beta$    | Mouse                      | H57-597      | APC                |
| CD4            | Mouse                      | GK1.5        | APCCy7             |
| CD8            | Mouse                      | 53-6.7       | Pacific Blue       |
| CD44           | Mouse                      | IM7          | PerCPCy5.5         |
| CD25           | Mouse                      | PC61         | PE                 |
| B220           | Mouse                      | RA3-6B2      | Alexa 700          |

**Supplementary Table S19** Oligonucleotide primers.

| Primer                                      | Sequence                                                       |
|---------------------------------------------|----------------------------------------------------------------|
| <i>Marcall cloning</i>                      |                                                                |
| Coding-F                                    | ATGTCCACTTGCAGTTCATCCGAGATAGC                                  |
| HA-coding-F                                 | ATGTACCCATACGACGTCCAGACTACGCTATGTCCACTTGCAGTTCATCCGA<br>GATAGC |
| Coding-R                                    | CTAAATATCTAATTCCAAAAAGCCTCATC                                  |
| <i>Marcall mutagenesis</i>                  |                                                                |
| K275R                                       |                                                                |
| 5' primer                                   | GAAATGGGCCTGGGCAGAACCTATCAGGCCTTG                              |
| 3' primer                                   | CAAGGCCTGATAGGTTCTGCCAGGCCATTTC                                |
| <i>Marcall deletion identification</i>      |                                                                |
| 5'-primer                                   | TCAATTGATGTGCGCAGCATGTCCACTT                                   |
| 3'-primer-1                                 | CCAGATACGGGTTTGGCCATCGTAGCACTT                                 |
| 3'-primer-2                                 | GGTGATTAGCACCTTGGCCTCACCCACATA                                 |
| 3'-primer-3                                 | AGGACGACAGTCTCACTGCGGATGGAAGAA                                 |
| 3'-primer-4                                 | TTCCTGAATTGCAGGCTTTTAGGGAGAGCA                                 |
| 3'-primer-5                                 | GCCGCGATATCCGACTCAGCCTTGTCTTACT                                |
| 3'-primer-6                                 | GCCAGGTCACATGAAACCGGCTATCTGAAA                                 |
| <i>Drosophila heat shock RT-PCR primers</i> |                                                                |
| <i>Hsp83</i>                                |                                                                |
| 5' primer                                   | GGGTTTCTACTCCGCTACC                                            |
| 3' primer                                   | CAGTCGTTGGTCAGGGATTT                                           |
| <i>Hsp68</i>                                |                                                                |
| 5' primer                                   | GACAACGGCAAACCAAAGAT                                           |
| 3' primer                                   | GCGTCAATCTCCAAAGAAGC                                           |
| <i>Hsp67Ba</i>                              |                                                                |
| 5' primer                                   | ATCGCCATCATCCGTACAAT                                           |
| 3' primer                                   | CTGCGCATCCTTATCCTTCT                                           |
| <i>Hsp67Bb</i>                              |                                                                |
| 5' primer                                   | GAAGGAAGAGCTCCAGCAGA                                           |
| 3' primer                                   | ATTCATTCCAGGAGCCTTTG                                           |
| <i>Hsp67Bc</i>                              |                                                                |
| 5' primer                                   | CCACGATATGTTCCCGAATC                                           |
| 3' primer                                   | GAACTCCATCCTCCGACAAA                                           |
| <i>Hsp60</i>                                |                                                                |
| 5' primer                                   | GAGGTTATCGAGGGCATGAA                                           |
| 3' primer                                   | TACTCGGAGGTGGTGTCTCTC                                          |
| <i>Hsp60B</i>                               |                                                                |
| 5' primer                                   | CAAAGTGGGTCCAAGAGGAA                                           |
| 3' primer                                   | CGCATTTCAAAAGTCCTGT                                            |
| <i>Hsp27</i>                                |                                                                |
| 5' primer                                   | GAGGATGACTTCGGTTTTGG                                           |
| 3' primer                                   | ACTTGGCCTGTTCTCTTGTCT                                          |
| <i>Hsp26</i>                                |                                                                |
| 5' primer                                   | GATGGTGCCCTTCTATGAGC                                           |
| 3' primer                                   | CCTTGGGATTCTCCTTCACA                                           |
| <i>Hsp23</i>                                |                                                                |
| 5' primer                                   | GTGTGCGAAAATCGGAAAGGA                                          |
| 3' primer                                   | CCTTGGGATTCTCCTTCACA                                           |



---

|                               |                                                  |
|-------------------------------|--------------------------------------------------|
| <i>Hsp22</i>                  |                                                  |
| 5' primer                     | TGCGTTCCTTACCGATGTTT                             |
| 3' primer                     | ACCTTGTCGCCCTCGTATC                              |
| <i>Hsf</i>                    |                                                  |
| 5' primer                     | CCGCTGGCGGTAATATTCTA                             |
| 3' primer                     | CCCAAATTTTGTGCTGGT                               |
| <i>DnaJ-1 (Droj1)</i>         |                                                  |
| 5' primer                     | CCACATTTGCCAGTCTTT                               |
| 3' primer                     | TTGTTCGCGAATGATGAAGAC                            |
| <i>Gapdh2</i>                 |                                                  |
| 5' primer                     | ATCGTCGAGGGTCTGATGAC                             |
| 3' primer                     | TCAGCTTCACGAACTTGTCG                             |
| <br>                          |                                                  |
| <i>Drosophila RT-PCR</i>      |                                                  |
| <i>primers for microarray</i> |                                                  |
| <i>verifiacation</i>          |                                                  |
| <i>sgg</i>                    |                                                  |
| 5' primer                     | AGCTGAACGACCTGTGGCCC                             |
| 3' primer                     | TCGCGACCTGTCGTCTCCCA                             |
| <i>Cdk9</i>                   |                                                  |
| 5' primer                     | GGCCAAGGCACCTTCGGAGAG                            |
| 3' primer                     | GTGGCCTTGGTGCGGCAGAT                             |
| <i>shi</i>                    |                                                  |
| 5' primer                     | TGAAACGATTTGGAAGCGGAGTGTGG                       |
| 3' primer                     | AGCGCACTGCGATTTGGGCTT                            |
| <i>shn</i>                    |                                                  |
| 5' primer                     | ACCTCCGGCAACGAAAGCGG                             |
| 3' primer                     | TAACGGGCCTGCTGTTGGCG                             |
| <i>Dad</i>                    |                                                  |
| 5' primer                     | CAGCACGTCCAGAGCCACCG                             |
| 3' primer                     | GGCGGGACAAGTGGGCAGTC                             |
| <i>Rab27</i>                  |                                                  |
| 5' primer                     | CGCGACGCCATGGGTTTCCT                             |
| 3' primer                     | CCGCGTTCTCGATCCGCTCC                             |
| <i>srp</i>                    |                                                  |
| 5' primer                     | CGTCGGGAACGGCAGCAACT                             |
| 3' primer                     | TGGTCAGTGGCCGTGGGACA                             |
| <br>                          |                                                  |
| <i>Drosophila N-Dam-</i>      |                                                  |
| <i>Marcall RT-PCR primers</i> |                                                  |
| 5' primer                     | GGCACACGTAAAAAGGTGGA                             |
| 3' primer                     | GGACCGCTCCTGTTGATCT                              |
| <br>                          |                                                  |
| <i>Smarcall cloning</i>       |                                                  |
| Coding-F                      | ATGTCCTTGCCACTTACAGAGGAGCAG                      |
| Coding-R                      | TTAAAGAAAATACTTTATTTCAATGAGC                     |
| <br>                          |                                                  |
| <i>Smarcall KO construct</i>  |                                                  |
| <i>primers</i>                |                                                  |
| 5' HR-F                       | CGGGGTACCCAGAACGGAACAACCGCTAAGGAAG               |
| 5' HR-R                       | ACGCGTCGACGGGACCTTCGAGGATATTCGTCTCC              |
| 3' HR-F                       | ACGCGTCGACTGCATCGCTGTCTCTCATTCTCTC               |
| 3' HR-R                       | ATAAGAATGCGGCCGCGGCACAGTGACATGCCCTGTAATTC        |
| Left Int 1-F                  | ACGCGTCGACGGGCTGGGCCAAACCCTAACTAGAA              |
| Left Int1-R                   | GGAATTCGCTCTTCTCACTACATTTCTGTTGAATCTGCAGGTGACCAA |
| Right Int 1-F                 | CGCGGATCCGATGGAAGGCAAGGGGAAAATTTAGTGTGACG        |

---

---

|               |                                                       |
|---------------|-------------------------------------------------------|
| Right Int 1-R | ATAAGAAT <u>GCGGCCG</u> CAAAAACGTACGTCCACCATGTTTGATT  |
| Left Int 1-F  | ACGCGT <u>CGACTT</u> CACCTGCAGCGGAAAGTTAGCAG          |
| Left Int 1-R  | CCGGAAT <u>TCCAGGGC</u> AGACTCGGAAGATGGGGTACA         |
| Right Int 3-L | CGCGGAT <u>CCTTAATTA</u> TGTCGGTGTCTTCTGTCCTCTTGTCCTG |
| Right Int 3-R | ATAAGAAT <u>GCGGCCG</u> CCATCAGGAAGGCTGAGAGCCACTG     |

*Smarc11 genotyping primers*

|          |                                |
|----------|--------------------------------|
| Primer A | GGTGATGTGTGTTGGTTGAGTTGAA      |
| Primer B | TCAGACAGAAATAGACTGGCCAATGA     |
| Primer C | GGCACAGTGACCCTTGTCCTCCAGTTCTCC |
| Primer D | GCTACAGGGGAAACCAAGCCTGCACACG   |

*Mouse RNA polymerase II large subunit RT-PCR primers*

*Polr2a*

|           |                      |
|-----------|----------------------|
| 5' primer | GGAGGGTGATGAGGATCTGA |
| 3' primer | GCCCAACACAAAACACTCCT |

*Polr2b*

|           |                      |
|-----------|----------------------|
| 5' primer | GTATTGAACCGCCTGACGTT |
| 3' primer | TCCAAAATTGGAGAGGGTTG |

*Human SMARCAL1 RT-PCR primers*

|           |                          |
|-----------|--------------------------|
| 5' primer | CGCCTGACAGCTGGCCTGATC    |
| 3' primer | TGGCAACCTTTAGGACCGGCATAG |

*Human GAPDH RT-PCR primers*

|           |                       |
|-----------|-----------------------|
| 5' primer | CTTTTGCGTCGCCAGCCGAG  |
| 3' primer | GGTGACCAGGCGCCCAATACG |

*Human RNA polymerase II large subunit RT-PCR primers*

*POLR2A*

|           |                      |
|-----------|----------------------|
| 5' primer | CGCTTAAGCCTTCCAACAAG |
| 3' primer | GAGGACGACCTTGCTGTCTC |

*POLR2B*

|           |                      |
|-----------|----------------------|
| 5' primer | AAGAACCGCCACGATATTTG |
| 3' primer | TTGACCGCAACATAATTGGA |

---

- Underlined and italicized bases represent restriction enzyme sites that were introduced into the DNA.
